# Supplementary material for: Dendrochemical Challenge in Climate Science: Whether Chemical Elements in Wood Reflect the Fluctuations in Weather Parameters
Source: MDPI journal article supplement (doi:10.3390/plants11233240), 2022-11-25
Supplement: s1 [file s1]

Table S27. Scots pine #3. Initial core. After alcohol extraction. After HCl extraction.

|      |                          |
|------|--------------------------|
|      | inner border of the bark |
| pith |                          |

|                              |
|------------------------------|
| Scots pine #3. Initial core. |
|------------------------------|

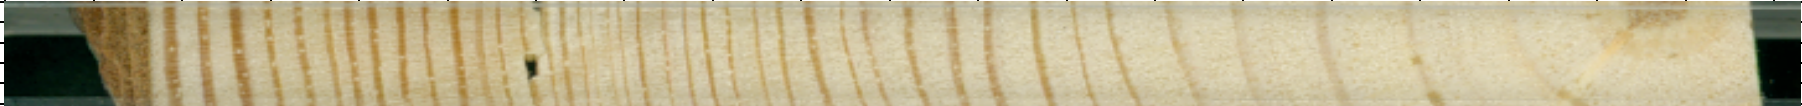[illegible]

[illegible]

[illegible]

[illegible]

|       |    |    |    |    |     |     |     |     |      |     |     |  |  |  |  |  |  |  |  |
|-------|----|----|----|----|-----|-----|-----|-----|------|-----|-----|--|--|--|--|--|--|--|--|
| 41.81 | 0  | 0  | 28 | 0  | 235 | 157 | 47  | 40  | 1905 | 370 | 493 |  |  |  |  |  |  |  |  |
| 41.91 | 0  | 0  | 33 | 0  | 233 | 210 | 116 | 122 | 2169 | 178 | 596 |  |  |  |  |  |  |  |  |
| 42.01 | 0  | 11 | 16 | 7  | 284 | 190 | 144 | 266 | 2190 | 411 | 603 |  |  |  |  |  |  |  |  |
| 42.11 | 9  | 16 | 16 | 0  | 228 | 130 | 142 | 220 | 2023 | 156 | 581 |  |  |  |  |  |  |  |  |
| 42.21 | 24 | 29 | 65 | 0  | 216 | 98  | 146 | 220 | 1883 | 117 | 577 |  |  |  |  |  |  |  |  |
| 42.31 | 0  | 0  | 44 | 12 | 168 | 81  | 121 | 262 | 1849 | 61  | 557 |  |  |  |  |  |  |  |  |
| 42.41 | 11 | 6  | 26 | 0  | 191 | 197 | 186 | 272 | 1776 | 310 | 473 |  |  |  |  |  |  |  |  |
| 42.51 | 0  | 0  | 22 | 0  | 220 | 225 | 167 | 320 | 1658 | 429 | 422 |  |  |  |  |  |  |  |  |
| 42.61 | 0  | 0  | 33 | 0  | 156 | 123 | 196 | 138 | 1507 | 332 | 381 |  |  |  |  |  |  |  |  |
| 42.71 | 0  | 11 | 39 | 0  | 132 | 98  | 101 | 28  | 1743 | 379 | 408 |  |  |  |  |  |  |  |  |
| 42.81 | 13 | 0  | 39 | 0  | 172 | 132 | 56  | 40  | 1836 | 528 | 441 |  |  |  |  |  |  |  |  |
| 42.91 | 11 | 38 | 34 | 18 | 259 | 185 | 43  | 98  | 2063 | 390 | 437 |  |  |  |  |  |  |  |  |
| 43    | 5  | 0  | 41 | 0  | 215 | 172 | 75  | 188 | 2222 | 275 | 574 |  |  |  |  |  |  |  |  |
| 43.11 | 35 | 21 | 44 | 21 | 224 | 115 | 103 | 28  | 2296 | 160 | 596 |  |  |  |  |  |  |  |  |
| 43.2  | 0  | 5  | 0  | 0  | 259 | 67  | 235 | 230 | 2090 | 99  | 672 |  |  |  |  |  |  |  |  |
| 43.31 | 14 | 27 | 49 | 0  | 182 | 99  | 157 | 230 | 1814 | 24  | 603 |  |  |  |  |  |  |  |  |
| 43.4  | 42 | 28 | 37 | 0  | 202 | 162 | 130 | 24  | 1407 | 197 | 401 |  |  |  |  |  |  |  |  |
| 43.51 | 17 | 8  | 31 | 28 | 149 | 155 | 0   | 48  | 1207 | 495 | 356 |  |  |  |  |  |  |  |  |
| 43.6  | 4  | 7  | 19 | 5  | 203 | 424 | 73  | 131 | 1325 | 589 | 378 |  |  |  |  |  |  |  |  |
| 43.7  | 0  | 0  | 33 | 0  | 161 | 508 | 8   | 162 | 1589 | 732 | 428 |  |  |  |  |  |  |  |  |
| 43.81 | 13 | 8  | 24 | 0  | 183 | 268 | 51  | 64  | 1759 | 624 | 462 |  |  |  |  |  |  |  |  |
| 43.9  | 38 | 16 | 48 | 41 | 168 | 223 | 106 | 49  | 2006 | 558 | 508 |  |  |  |  |  |  |  |  |
| 44.01 | 0  | 5  | 38 | 70 | 191 | 425 | 71  | 206 | 2011 | 355 | 509 |  |  |  |  |  |  |  |  |
| 44.11 | 0  | 10 | 36 | 31 | 189 | 306 | 20  | 132 | 1827 | 477 | 477 |  |  |  |  |  |  |  |  |
| 44.21 | 13 | 31 | 37 | 0  | 222 | 249 | 82  | 70  | 1963 | 328 | 535 |  |  |  |  |  |  |  |  |
| 44.3  | 0  | 14 | 21 | 0  | 161 | 237 | 55  | 102 | 2065 | 413 | 516 |  |  |  |  |  |  |  |  |
| 44.41 | 0  | 10 | 34 | 0  | 154 | 79  | 83  | 163 | 2073 | 203 | 493 |  |  |  |  |  |  |  |  |
| 44.5  | 13 | 30 | 37 | 0  | 202 | 96  | 158 | 221 | 1932 | 302 | 500 |  |  |  |  |  |  |  |  |
| 44.61 | 7  | 0  | 0  | 11 | 155 | 56  | 140 | 200 | 1844 | 374 | 457 |  |  |  |  |  |  |  |  |
| 44.7  | 11 | 7  | 20 | 0  | 168 | 125 | 118 | 208 | 2077 | 438 | 450 |  |  |  |  |  |  |  |  |
| 44.81 | 9  | 6  | 13 | 0  | 219 | 68  | 128 | 210 | 2540 | 354 | 442 |  |  |  |  |  |  |  |  |
| 44.91 | 0  | 6  | 56 | 0  | 164 | 123 | 51  | 85  | 2320 | 406 | 446 |  |  |  |  |  |  |  |  |
| 45    | 0  | 0  | 27 | 0  | 177 | 73  | 54  | 53  | 1918 | 395 | 457 |  |  |  |  |  |  |  |  |
| 45.11 | 14 | 0  | 30 | 0  | 202 | 101 | 119 | 158 | 1759 | 393 | 430 |  |  |  |  |  |  |  |  |
| 45.21 | 18 | 16 | 44 | 0  | 147 | 38  | 137 | 299 | 1639 | 125 | 531 |  |  |  |  |  |  |  |  |
| 45.3  | 0  | 8  | 33 | 0  | 190 | 72  | 138 | 227 | 1628 | 292 | 508 |  |  |  |  |  |  |  |  |
| 45.4  | 0  | 22 | 15 | 0  | 192 | 92  | 192 | 180 | 1481 | 82  | 385 |  |  |  |  |  |  |  |  |
| 45.51 | 0  | 15 | 22 | 0  | 215 | 49  | 157 | 0   | 1546 | 253 | 389 |  |  |  |  |  |  |  |  |
| 45.61 | 0  | 0  | 27 | 0  | 162 | 86  | 0   | 11  | 1561 | 555 | 416 |  |  |  |  |  |  |  |  |
| 45.71 | 0  | 16 | 12 | 0  | 143 | 101 | 93  | 173 | 1814 | 382 | 403 |  |  |  |  |  |  |  |  |
| 45.8  | 8  | 14 | 16 | 0  | 187 | 106 | 38  | 113 | 1920 | 506 | 462 |  |  |  |  |  |  |  |  |
| 45.91 | 0  | 7  | 38 | 0  | 157 | 127 | 175 | 142 | 2026 | 367 | 572 |  |  |  |  |  |  |  |  |
| 46.01 | 15 | 0  | 8  | 0  | 143 | 79  | 159 | 176 | 2244 | 288 | 707 |  |  |  |  |  |  |  |  |
| 46.11 | 0  | 15 | 45 | 0  | 199 | 61  | 159 | 219 | 2231 | 204 | 689 |  |  |  |  |  |  |  |  |
| 46.2  | 0  | 7  | 35 | 0  | 187 | 57  | 159 | 167 | 1873 | 143 | 473 |  |  |  |  |  |  |  |  |
| 46.31 | 0  | 0  | 29 | 0  | 188 | 49  | 58  | 158 | 1799 | 227 | 432 |  |  |  |  |  |  |  |  |
| 46.41 | 0  | 23 | 39 | 0  | 182 | 81  | 101 | 163 | 1935 | 429 | 495 |  |  |  |  |  |  |  |  |
| 46.5  | 0  | 0  | 18 | 0  | 169 | 101 | 100 | 252 | 2040 | 324 | 502 |  |  |  |  |  |  |  |  |
| 46.61 | 5  | 16 | 35 | 0  | 163 | 112 | 143 | 185 | 2038 | 132 | 539 |  |  |  |  |  |  |  |  |
| 46.7  | 6  | 0  | 4  | 0  | 130 | 86  | 61  | 68  | 1862 | 193 | 444 |  |  |  |  |  |  |  |  |
| 46.81 | 18 | 0  | 17 | 0  | 172 | 97  | 98  | 220 | 1775 | 429 | 438 |  |  |  |  |  |  |  |  |
| 46.91 | 13 | 6  | 26 | 24 | 181 | 93  | 57  | 0   | 1828 | 512 | 423 |  |  |  |  |  |  |  |  |
| 47.01 | 25 | 20 | 34 | 0  | 177 | 123 | 128 | 10  | 1879 | 682 | 426 |  |  |  |  |  |  |  |  |
| 47.11 | 9  | 0  | 24 | 0  | 164 | 119 | 24  | 103 | 2254 | 512 | 538 |  |  |  |  |  |  |  |  |
| 47.21 | 14 | 4  | 29 | 0  | 209 | 96  | 176 | 159 | 2573 | 275 | 633 |  |  |  |  |  |  |  |  |
| 47.31 | 0  | 8  | 19 | 0  | 207 | 92  | 161 | 195 | 2521 | 225 | 584 |  |  |  |  |  |  |  |  |
| 47.41 | 11 | 19 | 33 | 9  | 211 | 128 | 91  | 174 | 2268 | 271 | 500 |  |  |  |  |  |  |  |  |
| 47.51 | 0  | 21 | 25 | 0  | 275 | 55  | 10  | 223 | 1997 | 219 | 491 |  |  |  |  |  |  |  |  |
| 47.61 | 16 | 14 | 33 | 0  | 172 | 34  | 213 | 168 | 2062 | 214 | 473 |  |  |  |  |  |  |  |  |
| 47.71 | 10 | 15 | 37 | 0  | 185 | 41  | 37  | 141 | 2044 | 385 | 575 |  |  |  |  |  |  |  |  |
| 47.8  | 23 | 37 | 19 | 0  | 179 | 82  | 81  | 97  | 2092 | 244 | 456 |  |  |  |  |  |  |  |  |
| 47.91 | 6  | 19 | 26 | 0  | 163 | 63  | 167 | 62  | 2037 | 334 | 479 |  |  |  |  |  |  |  |  |
| 48    | 17 | 20 | 24 | 0  | 204 | 64  | 138 | 140 | 1895 | 296 | 467 |  |  |  |  |  |  |  |  |

|       |    |   |   |    |     |    |    |     |      |     |     |  |  |  |  |  |  |  |  |  |  |  |  |  |  |  |  |  |  |  |  |  |  |  |  |  |  |  |  |  |  |  |  |  |  |  |  |  |  |  |  |  |  |  |  |  |  |  |  |  |  |  |  |  |  |  |  |  |  |  |  |  |  |  |  |  |  |  |  |  |  |  |  |  |  |  |  |  |  |  |  |  |  |  |  |  |  |  |  |  |  |  |  |  |  |  |  |  |  |  |  |  |  |  |  |  |  |  |  |  |  |  |  |  |  |  |  |  |  |  |  |  |  |  |  |  |  |  |  |  |  |  |  |  |  |  |  |  |  |  |  |  |  |  |  |  |  |  |  |  |  |  |  |  |  |  |  |  |  |  |  |  |  |  |  |  |  |  |  |  |  |  |  |  |  |  |  |  |  |  |  |  |  |  |  |  |  |  |  |  |  |  |  |  |  |  |  |  |  |  |  |  |  |  |  |  |  |  |  |  |  |  |  |  |  |  |  |  |  |  |  |  |  |  |  |  |  |  |  |  |  |  |  |  |  |  |  |  |  |  |  |  |  |  |  |  |  |  |  |  |  |  |  |  |  |  |  |  |  |  |  |  |  |  |  |  |  |  |  |  |  |  |  |  |  |  |  |  |  |  |  |  |  |  |  |  |  |  |  |  |  |  |  |  |  |  |  |  |  |  |  |  |  |  |  |  |  |  |  |  |  |  |  |  |  |  |  |  |  |  |  |  |  |  |  |  |  |  |  |  |  |  |  |  |  |  |  |  |  |  |  |  |  |  |  |  |  |  |  |  |  |  |  |  |  |  |  |  |  |  |  |  |  |  |  |  |  |  |  |  |  |  |  |  |  |  |  |  |  |  |  |  |  |  |  |  |  |  |  |  |  |  |  |  |  |  |  |  |  |  |  |  |  |  |  |  |  |  |  |  |  |  |  |  |  |  |  |  |  |  |  |  |  |  |  |  |  |  |  |  |  |  |  |  |  |  |  |  |  |  |  |  |  |  |  |  |  |  |  |  |  |  |  |  |  |  |  |  |  |  |  |  |  |  |  |  |  |  |  |  |  |  |  |  |  |  |  |  |  |  |  |  |  |  |  |  |  |  |  |  |  |  |  |  |  |  |  |  |  |  |  |  |  |  |  |  |  |  |  |  |  |  |  |  |  |  |  |  |  |  |  |  |  |  |  |  |  |  |  |  |  |  |  |  |  |  |  |  |  |  |  |  |  |  |  |  |  |  |  |  |  |  |  |  |  |  |  |  |  |  |  |  |  |  |  |  |  |  |  |  |  |  |  |  |  |  |  |  |  |  |  |  |  |  |  |  |  |  |  |  |  |  |  |  |  |  |  |  |  |  |  |  |  |  |  |  |  |  |  |  |  |  |  |  |  |  |  |  |  |  |  |  |  |  |  |  |  |  |  |  |  |  |  |  |  |  |  |  |  |  |  |  |  |  |  |  |  |  |  |  |  |  |  |  |  |  |  |  |  |  |  |  |  |  |  |  |  |  |  |  |  |  |  |  |  |  |  |  |  |  |  |  |  |  |  |  |  |  |  |  |  |  |  |  |  |  |  |  |  |  |  |  |  |  |  |  |  |  |  |  |  |  |  |  |  |  |  |  |  |  |  |  |  |  |  |  |  |  |  |  |  |  |  |  |  |  |  |  |  |  |  |  |  |  |  |  |  |  |  |  |  |  |  |  |  |  |  |  |  |  |  |  |  |  |  |  |  |  |  |  |  |  |  |  |  |  |  |  |  |  |  |  |  |  |  |  |  |  |  |  |  |  |  |  |  |  |  |  |  |  |  |  |  |  |  |  |  |  |  |  |  |  |  |  |  |  |  |  |  |  |  |  |  |  |  |  |  |  |  |  |  |  |  |  |  |  |  |  |  |  |  |  |  |  |  |  |  |  |  |  |  |  |  |  |  |  |  |  |  |  |  |  |  |  |  |  |  |  |  |  |  |  |  |  |  |  |  |  |  |  |  |  |  |  |  |  |  |  |  |  |  |  |  |  |  |  |  |  |  |  |  |  |  |  |  |  |  |  |  |  |  |  |  |  |  |  |  |  |  |  |  |  |  |  |  |  |  |  |  |  |  |  |  |  |  |  |  |  |  |  |  |  |  |  |  |  |  |  |  |  |  |  |  |  |  |  |  |  |  |  |  |  |  |  |  |  |  |  |  |  |  |  |  |  |  |  |  |  |  |  |  |  |  |  |  |  |  |  |  |  |  |  |  |  |  |  |  |  |  |  |  |  |  |  |  |  |  |  |  |  |  |  |  |  |  |  |  |  |  |  |  |  |  |  |  |  |  |  |  |  |  |  |  |  |  |  |  |  |  |  |  |  |  |  |  |  |  |  |  |  |  |  |  |  |  |  |  |  |  |  |  |  |  |  |  |  |  |  |  |  |  |  |  |  |  |  |  |  |  |  |  |  |  |  |  |  |  |  |  |  |  |  |  |  |  |  |  |  |  |  |  |  |  |  |  |  |  |  |  |  |  |  |  |  |  |  |  |  |  |  |  |  |  |  |  |  |  |  |  |  |  |  |  |  |  |  |  |  |  |  |  |  |  |  |  |  |  |  |  |  |  |  |  |  |  |  |  |  |  |  |  |  |  |  |  |  |  |  |  |  |  |  |  |  |  |  |  |  |  |  |  |  |  |  |  |  |  |  |  |  |  |  |  |  |  |  |  |  |  |  |  |  |  |  |  |  |  |  |  |  |  |  |  |  |  |  |  |  |  |  |  |  |  |  |  |  |  |  |  |  |  |  |  |  |  |  |  |  |  |  |  |  |  |  |  |  |  |  |  |  |  |  |  |  |  |  |  |  |  |  |  |  |  |  |  |  |  |  |  |  |  |  |  |  |  |  |  |  |  |  |  |  |  |  |  |  |  |  |  |  |  |  |  |  |  |  |  |  |  |  |  |  |  |  |  |  |  |  |  |  |  |  |  |  |  |  |  |  |  |  |  |  |  |  |  |  |  |  |  |  |  |  |  |  |  |  |  |  |  |  |  |  |  |  |  |  |  |  |  |  |  |
|-------|----|---|---|----|-----|----|----|-----|------|-----|-----|--|--|--|--|--|--|--|--|--|--|--|--|--|--|--|--|--|--|--|--|--|--|--|--|--|--|--|--|--|--|--|--|--|--|--|--|--|--|--|--|--|--|--|--|--|--|--|--|--|--|--|--|--|--|--|--|--|--|--|--|--|--|--|--|--|--|--|--|--|--|--|--|--|--|--|--|--|--|--|--|--|--|--|--|--|--|--|--|--|--|--|--|--|--|--|--|--|--|--|--|--|--|--|--|--|--|--|--|--|--|--|--|--|--|--|--|--|--|--|--|--|--|--|--|--|--|--|--|--|--|--|--|--|--|--|--|--|--|--|--|--|--|--|--|--|--|--|--|--|--|--|--|--|--|--|--|--|--|--|--|--|--|--|--|--|--|--|--|--|--|--|--|--|--|--|--|--|--|--|--|--|--|--|--|--|--|--|--|--|--|--|--|--|--|--|--|--|--|--|--|--|--|--|--|--|--|--|--|--|--|--|--|--|--|--|--|--|--|--|--|--|--|--|--|--|--|--|--|--|--|--|--|--|--|--|--|--|--|--|--|--|--|--|--|--|--|--|--|--|--|--|--|--|--|--|--|--|--|--|--|--|--|--|--|--|--|--|--|--|--|--|--|--|--|--|--|--|--|--|--|--|--|--|--|--|--|--|--|--|--|--|--|--|--|--|--|--|--|--|--|--|--|--|--|--|--|--|--|--|--|--|--|--|--|--|--|--|--|--|--|--|--|--|--|--|--|--|--|--|--|--|--|--|--|--|--|--|--|--|--|--|--|--|--|--|--|--|--|--|--|--|--|--|--|--|--|--|--|--|--|--|--|--|--|--|--|--|--|--|--|--|--|--|--|--|--|--|--|--|--|--|--|--|--|--|--|--|--|--|--|--|--|--|--|--|--|--|--|--|--|--|--|--|--|--|--|--|--|--|--|--|--|--|--|--|--|--|--|--|--|--|--|--|--|--|--|--|--|--|--|--|--|--|--|--|--|--|--|--|--|--|--|--|--|--|--|--|--|--|--|--|--|--|--|--|--|--|--|--|--|--|--|--|--|--|--|--|--|--|--|--|--|--|--|--|--|--|--|--|--|--|--|--|--|--|--|--|--|--|--|--|--|--|--|--|--|--|--|--|--|--|--|--|--|--|--|--|--|--|--|--|--|--|--|--|--|--|--|--|--|--|--|--|--|--|--|--|--|--|--|--|--|--|--|--|--|--|--|--|--|--|--|--|--|--|--|--|--|--|--|--|--|--|--|--|--|--|--|--|--|--|--|--|--|--|--|--|--|--|--|--|--|--|--|--|--|--|--|--|--|--|--|--|--|--|--|--|--|--|--|--|--|--|--|--|--|--|--|--|--|--|--|--|--|--|--|--|--|--|--|--|--|--|--|--|--|--|--|--|--|--|--|--|--|--|--|--|--|--|--|--|--|--|--|--|--|--|--|--|--|--|--|--|--|--|--|--|--|--|--|--|--|--|--|--|--|--|--|--|--|--|--|--|--|--|--|--|--|--|--|--|--|--|--|--|--|--|--|--|--|--|--|--|--|--|--|--|--|--|--|--|--|--|--|--|--|--|--|--|--|--|--|--|--|--|--|--|--|--|--|--|--|--|--|--|--|--|--|--|--|--|--|--|--|--|--|--|--|--|--|--|--|--|--|--|--|--|--|--|--|--|--|--|--|--|--|--|--|--|--|--|--|--|--|--|--|--|--|--|--|--|--|--|--|--|--|--|--|--|--|--|--|--|--|--|--|--|--|--|--|--|--|--|--|--|--|--|--|--|--|--|--|--|--|--|--|--|--|--|--|--|--|--|--|--|--|--|--|--|--|--|--|--|--|--|--|--|--|--|--|--|--|--|--|--|--|--|--|--|--|--|--|--|--|--|--|--|--|--|--|--|--|--|--|--|--|--|--|--|--|--|--|--|--|--|--|--|--|--|--|--|--|--|--|--|--|--|--|--|--|--|--|--|--|--|--|--|--|--|--|--|--|--|--|--|--|--|--|--|--|--|--|--|--|--|--|--|--|--|--|--|--|--|--|--|--|--|--|--|--|--|--|--|--|--|--|--|--|--|--|--|--|--|--|--|--|--|--|--|--|--|--|--|--|--|--|--|--|--|--|--|--|--|--|--|--|--|--|--|--|--|--|--|--|--|--|--|--|--|--|--|--|--|--|--|--|--|--|--|--|--|--|--|--|--|--|--|--|--|--|--|--|--|--|--|--|--|--|--|--|--|--|--|--|--|--|--|--|--|--|--|--|--|--|--|--|--|--|--|--|--|--|--|--|--|--|--|--|--|--|--|--|--|--|--|--|--|--|--|--|--|--|--|--|--|--|--|--|--|--|--|--|--|--|--|--|--|--|--|--|--|--|--|--|--|--|--|--|--|--|--|--|--|--|--|--|--|--|--|--|--|--|--|--|--|--|--|--|--|--|--|--|--|--|--|--|--|--|--|--|--|--|--|--|--|--|--|--|--|--|--|--|--|--|--|--|--|--|--|--|--|--|--|--|--|--|--|--|--|--|--|--|--|--|--|--|--|--|--|--|--|--|--|--|--|--|--|--|--|--|--|--|--|--|--|--|--|--|--|--|--|--|--|--|--|--|--|--|--|--|--|--|--|--|--|--|--|--|--|--|--|--|--|--|--|--|--|--|--|--|--|--|--|--|--|--|--|--|--|--|--|--|--|--|--|--|--|--|--|--|--|--|--|--|--|--|--|--|--|--|--|--|--|--|--|--|--|--|--|--|--|--|--|--|--|--|--|--|--|--|--|--|--|--|--|--|--|--|--|--|--|--|--|--|--|--|--|--|--|--|--|--|--|--|--|--|--|--|--|--|--|--|--|--|--|--|--|--|--|--|--|--|--|--|--|--|--|--|--|--|--|--|--|--|--|--|--|--|--|--|--|--|--|--|--|--|--|--|--|--|--|--|--|--|--|--|--|--|--|--|--|--|--|--|--|--|--|--|--|--|--|--|--|--|--|--|--|--|--|--|--|--|--|--|--|--|--|--|--|--|--|--|--|--|--|--|--|--|--|--|
| 48.11 | 11 | 0 | 8 | 10 | 111 | 97 | 74 | 182 | 1872 | 427 | 431 |  |  |  |  |  |  |  |  |  |  |  |  |  |  |  |  |  |  |  |  |  |  |  |  |  |  |  |  |  |  |  |  |  |  |  |  |  |  |  |  |  |  |  |  |  |  |  |  |  |  |  |  |  |  |  |  |  |  |  |  |  |  |  |  |  |  |  |  |  |  |  |  |  |  |  |  |  |  |  |  |  |  |  |  |  |  |  |  |  |  |  |  |  |  |  |  |  |  |  |  |  |  |  |  |  |  |  |  |  |  |  |  |  |  |  |  |  |  |  |  |  |  |  |  |  |  |  |  |  |  |  |  |  |  |  |  |  |  |  |  |  |  |  |  |  |  |  |  |  |  |  |  |  |  |  |  |  |  |  |  |  |  |  |  |  |  |  |  |  |  |  |  |  |  |  |  |  |  |  |  |  |  |  |  |  |  |  |  |  |  |  |  |  |  |  |  |  |  |  |  |  |  |  |  |  |  |  |  |  |  |  |  |  |  |  |  |  |  |  |  |  |  |  |  |  |  |  |  |  |  |  |  |  |  |  |  |  |  |  |  |  |  |  |  |  |  |  |  |  |  |  |  |  |  |  |  |  |  |  |  |  |  |  |  |  |  |  |  |  |  |  |  |  |  |  |  |  |  |  |  |  |  |  |  |  |  |  |  |  |  |  |  |  |  |  |  |  |  |  |  |  |  |  |  |  |  |  |  |  |  |  |  |  |  |  |  |  |  |  |  |  |  |  |  |  |  |  |  |  |  |  |  |  |  |  |  |  |  |  |  |  |  |  |  |  |  |  |  |  |  |  |  |  |  |  |  |  |  |  |  |  |  |  |  |  |  |  |  |  |  |  |  |  |  |  |  |  |  |  |  |  |  |  |  |  |  |  |  |  |  |  |  |  |  |  |  |  |  |  |  |  |  |  |  |  |  |  |  |  |  |  |  |  |  |  |  |  |  |  |  |  |  |  |  |  |  |  |  |  |  |  |  |  |  |  |  |  |  |  |  |  |  |  |  |  |  |  |  |  |  |  |  |  |  |  |  |  |  |  |  |  |  |  |  |  |  |  |  |  |  |  |  |  |  |  |  |  |  |  |  |  |  |  |  |  |  |  |  |  |  |  |  |  |  |  |  |  |  |  |  |  |  |  |  |  |  |  |  |  |  |  |  |  |  |  |  |  |  |  |  |  |  |  |  |  |  |  |  |  |  |  |  |  |  |  |  |  |  |  |  |  |  |  |  |  |  |  |  |  |  |  |  |  |  |  |  |  |  |  |  |  |  |  |  |  |  |  |  |  |  |  |  |  |  |  |  |  |  |  |  |  |  |  |  |  |  |  |  |  |  |  |  |  |  |  |  |  |  |  |  |  |  |  |  |  |  |  |  |  |  |  |  |  |  |  |  |  |  |  |  |  |  |  |  |  |  |  |  |  |  |  |  |  |  |  |  |  |  |  |  |  |  |  |  |  |  |  |  |  |  |  |  |  |  |  |  |  |  |  |  |  |  |  |  |  |  |  |  |  |  |  |  |  |  |  |  |  |  |  |  |  |  |  |  |  |  |  |  |  |  |  |  |  |  |  |  |  |  |  |  |  |  |  |  |  |  |  |  |  |  |  |  |  |  |  |  |  |  |  |  |  |  |  |  |  |  |  |  |  |  |  |  |  |  |  |  |  |  |  |  |  |  |  |  |  |  |  |  |  |  |  |  |  |  |  |  |  |  |  |  |  |  |  |  |  |  |  |  |  |  |  |  |  |  |  |  |  |  |  |  |  |  |  |  |  |  |  |  |  |  |  |  |  |  |  |  |  |  |  |  |  |  |  |  |  |  |  |  |  |  |  |  |  |  |  |  |  |  |  |  |  |  |  |  |  |  |  |  |  |  |  |  |  |  |  |  |  |  |  |  |  |  |  |  |  |  |  |  |  |  |  |  |  |  |  |  |  |  |  |  |  |  |  |  |  |  |  |  |  |  |  |  |  |  |  |  |  |  |  |  |  |  |  |  |  |  |  |  |  |  |  |  |  |  |  |  |  |  |  |  |  |  |  |  |  |  |  |  |  |  |  |  |  |  |  |  |  |  |  |  |  |  |  |  |  |  |  |  |  |  |  |  |  |  |  |  |  |  |  |  |  |  |  |  |  |  |  |  |  |  |  |  |  |  |  |  |  |  |  |  |  |  |  |  |  |  |  |  |  |  |  |  |  |  |  |  |  |  |  |  |  |  |  |  |  |  |  |  |  |  |  |  |  |  |  |  |  |  |  |  |  |  |  |  |  |  |  |  |  |  |  |  |  |  |  |  |  |  |  |  |  |  |  |  |  |  |  |  |  |  |  |  |  |  |  |  |  |  |  |  |  |  |  |  |  |  |  |  |  |  |  |  |  |  |  |  |  |  |  |  |  |  |  |  |  |  |  |  |  |  |  |  |  |  |  |  |  |  |  |  |  |  |  |  |  |  |  |  |  |  |  |  |  |  |  |  |  |  |  |  |  |  |  |  |  |  |  |  |  |  |  |  |  |  |  |  |  |  |  |  |  |  |  |  |  |  |  |  |  |  |  |  |  |  |  |  |  |  |  |  |  |  |  |  |  |  |  |  |  |  |  |  |  |  |  |  |  |  |  |  |  |  |  |  |  |  |  |  |  |  |  |  |  |  |  |  |  |  |  |  |  |  |  |  |  |  |  |  |  |  |  |  |  |  |  |  |  |  |  |  |  |  |  |  |  |  |  |  |  |  |  |  |  |  |  |  |  |  |  |  |  |  |  |  |  |  |  |  |  |  |  |  |  |  |  |  |  |  |  |  |  |  |  |  |  |  |  |  |  |  |  |  |  |  |  |  |  |  |  |  |  |  |  |  |  |  |  |  |  |  |  |  |  |  |  |  |  |  |  |  |  |  |  |  |  |  |  |  |  |  |  |  |  |  |  |  |  |  |  |  |  |  |  |  |  |  |  |  |  |  |  |  |  |  |  |  |  |  |  |  |  |  |  |  |  |  |  |  |  |  |  |  |  |  |  |  |  |  |  |  |  |  |  |  |  |  |  |  |  |  |
|-------|----|---|---|----|-----|----|----|-----|------|-----|-----|--|--|--|--|--|--|--|--|--|--|--|--|--|--|--|--|--|--|--|--|--|--|--|--|--|--|--|--|--|--|--|--|--|--|--|--|--|--|--|--|--|--|--|--|--|--|--|--|--|--|--|--|--|--|--|--|--|--|--|--|--|--|--|--|--|--|--|--|--|--|--|--|--|--|--|--|--|--|--|--|--|--|--|--|--|--|--|--|--|--|--|--|--|--|--|--|--|--|--|--|--|--|--|--|--|--|--|--|--|--|--|--|--|--|--|--|--|--|--|--|--|--|--|--|--|--|--|--|--|--|--|--|--|--|--|--|--|--|--|--|--|--|--|--|--|--|--|--|--|--|--|--|--|--|--|--|--|--|--|--|--|--|--|--|--|--|--|--|--|--|--|--|--|--|--|--|--|--|--|--|--|--|--|--|--|--|--|--|--|--|--|--|--|--|--|--|--|--|--|--|--|--|--|--|--|--|--|--|--|--|--|--|--|--|--|--|--|--|--|--|--|--|--|--|--|--|--|--|--|--|--|--|--|--|--|--|--|--|--|--|--|--|--|--|--|--|--|--|--|--|--|--|--|--|--|--|--|--|--|--|--|--|--|--|--|--|--|--|--|--|--|--|--|--|--|--|--|--|--|--|--|--|--|--|--|--|--|--|--|--|--|--|--|--|--|--|--|--|--|--|--|--|--|--|--|--|--|--|--|--|--|--|--|--|--|--|--|--|--|--|--|--|--|--|--|--|--|--|--|--|--|--|--|--|--|--|--|--|--|--|--|--|--|--|--|--|--|--|--|--|--|--|--|--|--|--|--|--|--|--|--|--|--|--|--|--|--|--|--|--|--|--|--|--|--|--|--|--|--|--|--|--|--|--|--|--|--|--|--|--|--|--|--|--|--|--|--|--|--|--|--|--|--|--|--|--|--|--|--|--|--|--|--|--|--|--|--|--|--|--|--|--|--|--|--|--|--|--|--|--|--|--|--|--|--|--|--|--|--|--|--|--|--|--|--|--|--|--|--|--|--|--|--|--|--|--|--|--|--|--|--|--|--|--|--|--|--|--|--|--|--|--|--|--|--|--|--|--|--|--|--|--|--|--|--|--|--|--|--|--|--|--|--|--|--|--|--|--|--|--|--|--|--|--|--|--|--|--|--|--|--|--|--|--|--|--|--|--|--|--|--|--|--|--|--|--|--|--|--|--|--|--|--|--|--|--|--|--|--|--|--|--|--|--|--|--|--|--|--|--|--|--|--|--|--|--|--|--|--|--|--|--|--|--|--|--|--|--|--|--|--|--|--|--|--|--|--|--|--|--|--|--|--|--|--|--|--|--|--|--|--|--|--|--|--|--|--|--|--|--|--|--|--|--|--|--|--|--|--|--|--|--|--|--|--|--|--|--|--|--|--|--|--|--|--|--|--|--|--|--|--|--|--|--|--|--|--|--|--|--|--|--|--|--|--|--|--|--|--|--|--|--|--|--|--|--|--|--|--|--|--|--|--|--|--|--|--|--|--|--|--|--|--|--|--|--|--|--|--|--|--|--|--|--|--|--|--|--|--|--|--|--|--|--|--|--|--|--|--|--|--|--|--|--|--|--|--|--|--|--|--|--|--|--|--|--|--|--|--|--|--|--|--|--|--|--|--|--|--|--|--|--|--|--|--|--|--|--|--|--|--|--|--|--|--|--|--|--|--|--|--|--|--|--|--|--|--|--|--|--|--|--|--|--|--|--|--|--|--|--|--|--|--|--|--|--|--|--|--|--|--|--|--|--|--|--|--|--|--|--|--|--|--|--|--|--|--|--|--|--|--|--|--|--|--|--|--|--|--|--|--|--|--|--|--|--|--|--|--|--|--|--|--|--|--|--|--|--|--|--|--|--|--|--|--|--|--|--|--|--|--|--|--|--|--|--|--|--|--|--|--|--|--|--|--|--|--|--|--|--|--|--|--|--|--|--|--|--|--|--|--|--|--|--|--|--|--|--|--|--|--|--|--|--|--|--|--|--|--|--|--|--|--|--|--|--|--|--|--|--|--|--|--|--|--|--|--|--|--|--|--|--|--|--|--|--|--|--|--|--|--|--|--|--|--|--|--|--|--|--|--|--|--|--|--|--|--|--|--|--|--|--|--|--|--|--|--|--|--|--|--|--|--|--|--|--|--|--|--|--|--|--|--|--|--|--|--|--|--|--|--|--|--|--|--|--|--|--|--|--|--|--|--|--|--|--|--|--|--|--|--|--|--|--|--|--|--|--|--|--|--|--|--|--|--|--|--|--|--|--|--|--|--|--|--|--|--|--|--|--|--|--|--|--|--|--|--|--|--|--|--|--|--|--|--|--|--|--|--|--|--|--|--|--|--|--|--|--|--|--|--|--|--|--|--|--|--|--|--|--|--|--|--|--|--|--|--|--|--|--|--|--|--|--|--|--|--|--|--|--|--|--|--|--|--|--|--|--|--|--|--|--|--|--|--|--|--|--|--|--|--|--|--|--|--|--|--|--|--|--|--|--|--|--|--|--|--|--|--|--|--|--|--|--|--|--|--|--|--|--|--|--|--|--|--|--|--|--|--|--|--|--|--|--|--|--|--|--|--|--|--|--|--|--|--|--|--|--|--|--|--|--|--|--|--|--|--|--|--|--|--|--|--|--|--|--|--|--|--|--|--|--|--|--|--|--|--|--|--|--|--|--|--|--|--|--|--|--|--|--|--|--|--|--|--|--|--|--|--|--|--|--|--|--|--|--|--|--|--|--|--|--|--|--|--|--|--|--|--|--|--|--|--|--|--|--|--|--|--|--|--|--|--|--|--|--|--|--|--|--|--|--|--|--|--|--|--|--|--|--|--|--|--|--|--|--|--|--|--|--|--|--|--|--|--|--|--|--|--|--|--|--|--|--|--|--|--|--|--|--|--|--|--|--|--|--|--|--|--|--|--|--|--|--|--|--|--|--|--|--|--|--|--|--|--|--|--|--|--|--|--|--|--|--|--|--|--|--|--|--|--|--|--|--|--|--|--|--|--|--|--|--|--|--|--|--|--|--|--|--|

[illegible]

[illegible]

[illegible]

[illegible]

[illegible]

[illegible]

[illegible]



[illegible]

[illegible]

[illegible]

[illegible]

[illegible]

[illegible]

[illegible]

[illegible]

[illegible]

[illegible]



[illegible]

[illegible]

[illegible]

[illegible]

|        |    |    |    |    |     |    |     |     |    |     |    |  |  |  |  |  |  |  |  |  |
|--------|----|----|----|----|-----|----|-----|-----|----|-----|----|--|--|--|--|--|--|--|--|--|
| 102.61 | 49 | 0  | 10 | 24 | 56  | 56 | 0   | 81  | 40 | 104 | 32 |  |  |  |  |  |  |  |  |  |
| 102.70 | 26 | 0  | 0  | 10 | 100 | 52 | 23  | 90  | 46 | 223 | 9  |  |  |  |  |  |  |  |  |  |
| 102.81 | 36 | 0  | 0  | 42 | 58  | 52 | 34  | 0   | 44 | 316 | 0  |  |  |  |  |  |  |  |  |  |
| 102.91 | 41 | 0  | 0  | 5  | 144 | 80 | 113 | 131 | 33 | 191 | 0  |  |  |  |  |  |  |  |  |  |
| 103.01 | 40 | 0  | 0  | 6  | 90  | 52 | 0   | 33  | 28 | 375 | 6  |  |  |  |  |  |  |  |  |  |
| 103.11 | 31 | 0  | 0  | 14 | 83  | 19 | 0   | 91  | 45 | 293 | 33 |  |  |  |  |  |  |  |  |  |
| 103.20 | 46 | 0  | 0  | 20 | 97  | 54 | 75  | 60  | 31 | 403 | 9  |  |  |  |  |  |  |  |  |  |
| 103.30 | 51 | 0  | 0  | 0  | 33  | 38 | 0   | 145 | 28 | 209 | 16 |  |  |  |  |  |  |  |  |  |
| 103.41 | 54 | 0  | 0  | 18 | 123 | 56 | 141 | 106 | 37 | 257 | 16 |  |  |  |  |  |  |  |  |  |
| 103.50 | 14 | 0  | 0  | 19 | 53  | 21 | 73  | 9   | 19 | 286 | 9  |  |  |  |  |  |  |  |  |  |
| 103.61 | 22 | 6  | 0  | 0  | 71  | 35 | 86  | 82  | 30 | 143 | 5  |  |  |  |  |  |  |  |  |  |
| 103.71 | 12 | 5  | 0  | 33 | 69  | 29 | 0   | 44  | 22 | 207 | 0  |  |  |  |  |  |  |  |  |  |
| 103.80 | 36 | 0  | 0  | 0  | 86  | 79 | 0   | 162 | 13 | 390 | 0  |  |  |  |  |  |  |  |  |  |
| 103.91 | 61 | 0  | 0  | 46 | 101 | 79 | 0   | 26  | 19 | 393 | 9  |  |  |  |  |  |  |  |  |  |
| 104.00 | 49 | 0  | 0  | 28 | 77  | 74 | 0   | 120 | 0  | 188 | 19 |  |  |  |  |  |  |  |  |  |
| 104.10 | 50 | 0  | 0  | 14 | 106 | 46 | 0   | 140 | 47 | 210 | 0  |  |  |  |  |  |  |  |  |  |
| 104.21 | 29 | 0  | 0  | 33 | 50  | 18 | 22  | 20  | 42 | 254 | 0  |  |  |  |  |  |  |  |  |  |
| 104.31 | 41 | 0  | 0  | 0  | 72  | 0  | 0   | 0   | 8  | 216 | 29 |  |  |  |  |  |  |  |  |  |
| 104.41 | 45 | 0  | 0  | 0  | 65  | 46 | 126 | 0   | 36 | 333 | 0  |  |  |  |  |  |  |  |  |  |
| 104.51 | 17 | 0  | 0  | 0  | 73  | 72 | 36  | 145 | 38 | 407 | 23 |  |  |  |  |  |  |  |  |  |
| 104.60 | 77 | 0  | 0  | 10 | 65  | 46 | 0   | 45  | 32 | 478 | 0  |  |  |  |  |  |  |  |  |  |
| 104.71 | 18 | 0  | 0  | 19 | 102 | 56 | 0   | 88  | 26 | 229 | 8  |  |  |  |  |  |  |  |  |  |
| 104.81 | 70 | 0  | 0  | 0  | 72  | 31 | 12  | 86  | 24 | 184 | 0  |  |  |  |  |  |  |  |  |  |
| 104.91 | 35 | 0  | 0  | 27 | 84  | 70 | 0   | 26  | 25 | 288 | 4  |  |  |  |  |  |  |  |  |  |
| 105.01 | 18 | 0  | 0  | 0  | 77  | 60 | 0   | 0   | 25 | 530 | 0  |  |  |  |  |  |  |  |  |  |
| 105.11 | 31 | 0  | 0  | 0  | 74  | 79 | 0   | 9   | 8  | 344 | 13 |  |  |  |  |  |  |  |  |  |
| 105.21 | 20 | 0  | 0  | 0  | 95  | 84 | 52  | 112 | 33 | 411 | 22 |  |  |  |  |  |  |  |  |  |
| 105.31 | 37 | 0  | 0  | 17 | 101 | 43 | 29  | 51  | 22 | 419 | 0  |  |  |  |  |  |  |  |  |  |
| 105.40 | 15 | 0  | 0  | 14 | 125 | 83 | 0   | 135 | 8  | 311 | 9  |  |  |  |  |  |  |  |  |  |
| 105.51 | 33 | 0  | 0  | 4  | 64  | 30 | 98  | 111 | 42 | 238 | 5  |  |  |  |  |  |  |  |  |  |
| 105.60 | 57 | 0  | 0  | 0  | 45  | 28 | 0   | 67  | 15 | 247 | 10 |  |  |  |  |  |  |  |  |  |
| 105.71 | 51 | 0  | 0  | 10 | 78  | 36 | 51  | 84  | 38 | 342 | 8  |  |  |  |  |  |  |  |  |  |
| 105.80 | 45 | 0  | 0  | 6  | 104 | 82 | 0   | 43  | 22 | 334 | 16 |  |  |  |  |  |  |  |  |  |
| 105.90 | 31 | 0  | 0  | 29 | 87  | 76 | 149 | 107 | 35 | 311 | 0  |  |  |  |  |  |  |  |  |  |
| 106.01 | 29 | 0  | 0  | 0  | 126 | 16 | 58  | 151 | 52 | 200 | 0  |  |  |  |  |  |  |  |  |  |
| 106.10 | 27 | 0  | 0  | 32 | 72  | 26 | 102 | 96  | 42 | 296 | 12 |  |  |  |  |  |  |  |  |  |
| 106.20 | 38 | 0  | 0  | 0  | 75  | 19 | 125 | 63  | 30 | 375 | 0  |  |  |  |  |  |  |  |  |  |
| 106.31 | 14 | 0  | 0  | 19 | 61  | 81 | 71  | 73  | 17 | 312 | 16 |  |  |  |  |  |  |  |  |  |
| 106.41 | 0  | 13 | 0  | 0  | 93  | 51 | 18  | 10  | 21 | 252 | 7  |  |  |  |  |  |  |  |  |  |
| 106.51 | 39 | 0  | 0  | 16 | 66  | 65 | 50  | 15  | 41 | 194 | 0  |  |  |  |  |  |  |  |  |  |
| 106.60 | 25 | 0  | 0  | 35 | 96  | 88 | 19  | 0   | 18 | 339 | 0  |  |  |  |  |  |  |  |  |  |
| 106.71 | 38 | 0  | 0  | 22 | 77  | 32 | 75  | 135 | 22 | 214 | 24 |  |  |  |  |  |  |  |  |  |
| 106.81 | 28 | 0  | 0  | 0  | 141 | 38 | 79  | 108 | 10 | 151 | 23 |  |  |  |  |  |  |  |  |  |
| 106.91 | 48 | 9  | 0  | 0  | 56  | 16 | 15  | 84  | 0  | 179 | 8  |  |  |  |  |  |  |  |  |  |
| 107.01 | 45 | 0  | 0  | 0  | 56  | 0  | 0   | 80  | 43 | 159 | 0  |  |  |  |  |  |  |  |  |  |
| 107.10 | 47 | 0  | 0  | 17 | 94  | 60 | 57  | 61  | 39 | 92  | 9  |  |  |  |  |  |  |  |  |  |
| 107.21 | 63 | 11 | 0  | 26 | 57  | 18 | 8   | 0   | 14 | 402 | 0  |  |  |  |  |  |  |  |  |  |
| 107.31 | 27 | 0  | 0  | 6  | 72  | 34 | 115 | 0   | 33 | 353 | 0  |  |  |  |  |  |  |  |  |  |
| 107.41 | 26 | 0  | 0  | 9  | 80  | 60 | 29  | 23  | 14 | 384 | 6  |  |  |  |  |  |  |  |  |  |
| 107.51 | 36 | 0  | 0  | 11 | 76  | 65 | 0   | 0   | 10 | 495 | 0  |  |  |  |  |  |  |  |  |  |
| 107.60 | 53 | 0  | 0  | 0  | 62  | 98 | 68  | 56  | 6  | 179 | 0  |  |  |  |  |  |  |  |  |  |
| 107.70 | 31 | 0  | 0  | 49 | 72  | 59 | 23  | 40  | 36 | 354 | 13 |  |  |  |  |  |  |  |  |  |
| 107.81 | 15 | 0  | 0  | 10 | 84  | 86 | 119 | 0   | 32 | 352 | 0  |  |  |  |  |  |  |  |  |  |
| 107.90 | 63 | 0  | 0  | 35 | 74  | 46 | 130 | 155 | 20 | 228 | 0  |  |  |  |  |  |  |  |  |  |
| 108.01 | 51 | 0  | 0  | 12 | 87  | 78 | 59  | 123 | 34 | 149 | 26 |  |  |  |  |  |  |  |  |  |
| 108.11 | 49 | 0  | 0  | 17 | 84  | 29 | 97  | 67  | 15 | 279 | 0  |  |  |  |  |  |  |  |  |  |
| 108.21 | 29 | 0  | 0  | 20 | 66  | 0  | 34  | 90  | 28 | 235 | 6  |  |  |  |  |  |  |  |  |  |
| 108.30 | 38 | 0  | 0  | 4  | 89  | 42 | 109 | 61  | 31 | 302 | 0  |  |  |  |  |  |  |  |  |  |
| 108.41 | 36 | 0  | 0  | 0  | 75  | 32 | 0   | 96  | 40 | 252 | 0  |  |  |  |  |  |  |  |  |  |
| 108.50 | 41 | 0  | 0  | 0  | 94  | 50 | 12  | 68  | 18 | 333 | 0  |  |  |  |  |  |  |  |  |  |
| 108.60 | 12 | 0  | 0  | 4  | 86  | 62 | 40  | 0   | 42 | 138 | 0  |  |  |  |  |  |  |  |  |  |
| 108.71 | 42 | 0  | 0  | 27 | 49  | 44 | 77  | 75  | 54 | 232 | 0  |  |  |  |  |  |  |  |  |  |
| 108.80 | 50 | 0  | 0  | 26 | 99  | 60 | 73  | 211 | 44 | 188 | 0  |  |  |  |  |  |  |  |  |  |

|        |    |    |    |    |     |     |     |     |    |     |    |  |  |  |  |  |  |  |  |  |  |
|--------|----|----|----|----|-----|-----|-----|-----|----|-----|----|--|--|--|--|--|--|--|--|--|--|
| 108.91 | 34 | 0  | 0  | 0  | 77  | 48  | 0   | 145 | 24 | 183 | 8  |  |  |  |  |  |  |  |  |  |  |
| 109.00 | 36 | 0  | 0  | 24 | 109 | 32  | 84  | 74  | 45 | 226 | 18 |  |  |  |  |  |  |  |  |  |  |
| 109.11 | 65 | 0  | 0  | 0  | 46  | 14  | 183 | 130 | 6  | 104 | 0  |  |  |  |  |  |  |  |  |  |  |
| 109.21 | 11 | 0  | 0  | 14 | 62  | 67  | 18  | 148 | 24 | 293 | 0  |  |  |  |  |  |  |  |  |  |  |
| 109.30 | 53 | 0  | 0  | 10 | 48  | 34  | 106 | 62  | 22 | 348 | 0  |  |  |  |  |  |  |  |  |  |  |
| 109.40 | 55 | 0  | 0  | 25 | 78  | 35  | 5   | 6   | 23 | 147 | 0  |  |  |  |  |  |  |  |  |  |  |
| 109.51 | 44 | 16 | 0  | 24 | 91  | 36  | 0   | 0   | 20 | 261 | 15 |  |  |  |  |  |  |  |  |  |  |
| 109.61 | 38 | 4  | 0  | 6  | 59  | 82  | 69  | 129 | 22 | 313 | 0  |  |  |  |  |  |  |  |  |  |  |
| 109.71 | 25 | 0  | 0  | 33 | 100 | 23  | 171 | 49  | 28 | 367 | 0  |  |  |  |  |  |  |  |  |  |  |
| 109.80 | 55 | 0  | 0  | 0  | 58  | 34  | 0   | 54  | 47 | 120 | 0  |  |  |  |  |  |  |  |  |  |  |
| 109.91 | 65 | 0  | 0  | 30 | 77  | 58  | 49  | 83  | 37 | 59  | 24 |  |  |  |  |  |  |  |  |  |  |
| 110.01 | 28 | 7  | 0  | 47 | 71  | 24  | 49  | 132 | 46 | 199 | 0  |  |  |  |  |  |  |  |  |  |  |
| 110.10 | 37 | 0  | 0  | 0  | 78  | 60  | 14  | 61  | 39 | 403 | 0  |  |  |  |  |  |  |  |  |  |  |
| 110.21 | 49 | 0  | 0  | 5  | 71  | 71  | 31  | 0   | 23 | 306 | 11 |  |  |  |  |  |  |  |  |  |  |
| 110.30 | 32 | 0  | 0  | 22 | 81  | 43  | 91  | 77  | 33 | 451 | 0  |  |  |  |  |  |  |  |  |  |  |
| 110.40 | 11 | 0  | 0  | 0  | 112 | 64  | 66  | 83  | 29 | 401 | 5  |  |  |  |  |  |  |  |  |  |  |
| 110.51 | 29 | 0  | 0  | 23 | 88  | 46  | 22  | 6   | 43 | 258 | 13 |  |  |  |  |  |  |  |  |  |  |
| 110.61 | 37 | 0  | 0  | 18 | 61  | 108 | 108 | 21  | 20 | 398 | 20 |  |  |  |  |  |  |  |  |  |  |
| 110.71 | 43 | 0  | 0  | 0  | 82  | 112 | 21  | 0   | 24 | 315 | 20 |  |  |  |  |  |  |  |  |  |  |
| 110.81 | 40 | 18 | 0  | 0  | 39  | 28  | 16  | 0   | 14 | 361 | 23 |  |  |  |  |  |  |  |  |  |  |
| 110.90 | 41 | 0  | 0  | 41 | 72  | 74  | 91  | 88  | 19 | 78  | 0  |  |  |  |  |  |  |  |  |  |  |
| 111.01 | 42 | 5  | 0  | 0  | 93  | 6   | 62  | 24  | 36 | 174 | 0  |  |  |  |  |  |  |  |  |  |  |
| 111.10 | 49 | 9  | 0  | 0  | 85  | 27  | 0   | 26  | 40 | 130 | 15 |  |  |  |  |  |  |  |  |  |  |
| 111.20 | 38 | 0  | 0  | 10 | 90  | 84  | 61  | 5   | 17 | 257 | 11 |  |  |  |  |  |  |  |  |  |  |
| 111.30 | 35 | 0  | 0  | 0  | 107 | 88  | 35  | 22  | 20 | 211 | 7  |  |  |  |  |  |  |  |  |  |  |
| 111.40 | 45 | 0  | 0  | 52 | 79  | 81  | 10  | 113 | 50 | 318 | 7  |  |  |  |  |  |  |  |  |  |  |
| 111.51 | 26 | 0  | 0  | 26 | 75  | 113 | 19  | 0   | 51 | 376 | 16 |  |  |  |  |  |  |  |  |  |  |
| 111.60 | 55 | 0  | 0  | 10 | 105 | 71  | 65  | 0   | 40 | 375 | 6  |  |  |  |  |  |  |  |  |  |  |
| 111.71 | 23 | 0  | 0  | 0  | 111 | 107 | 0   | 0   | 32 | 341 | 0  |  |  |  |  |  |  |  |  |  |  |
| 111.81 | 6  | 0  | 0  | 50 | 75  | 64  | 78  | 0   | 53 | 489 | 0  |  |  |  |  |  |  |  |  |  |  |
| 111.90 | 11 | 0  | 0  | 4  | 163 | 89  | 79  | 122 | 15 | 515 | 18 |  |  |  |  |  |  |  |  |  |  |
| 112.01 | 10 | 0  | 0  | 0  | 89  | 45  | 131 | 158 | 25 | 292 | 0  |  |  |  |  |  |  |  |  |  |  |
| 112.11 | 33 | 12 | 0  | 41 | 91  | 70  | 46  | 0   | 24 | 185 | 15 |  |  |  |  |  |  |  |  |  |  |
| 112.21 | 32 | 0  | 0  | 0  | 65  | 59  | 271 | 99  | 27 | 122 | 0  |  |  |  |  |  |  |  |  |  |  |
| 112.31 | 50 | 0  | 0  | 0  | 36  | 59  | 119 | 100 | 34 | 249 | 0  |  |  |  |  |  |  |  |  |  |  |
| 112.41 | 30 | 0  | 0  | 0  | 87  | 77  | 118 | 164 | 20 | 131 | 0  |  |  |  |  |  |  |  |  |  |  |
| 112.51 | 35 | 0  | 0  | 0  | 81  | 33  | 89  | 0   | 30 | 354 | 0  |  |  |  |  |  |  |  |  |  |  |
| 112.61 | 48 | 0  | 0  | 9  | 83  | 65  | 55  | 41  | 45 | 455 | 31 |  |  |  |  |  |  |  |  |  |  |
| 112.71 | 5  | 0  | 0  | 10 | 53  | 39  | 0   | 0   | 20 | 239 | 0  |  |  |  |  |  |  |  |  |  |  |
| 112.81 | 25 | 0  | 0  | 24 | 94  | 77  | 32  | 0   | 46 | 402 | 0  |  |  |  |  |  |  |  |  |  |  |
| 112.90 | 26 | 0  | 0  | 22 | 112 | 44  | 7   | 35  | 30 | 221 | 0  |  |  |  |  |  |  |  |  |  |  |
| 113.01 | 53 | 0  | 0  | 5  | 85  | 105 | 75  | 29  | 19 | 217 | 4  |  |  |  |  |  |  |  |  |  |  |
| 113.11 | 0  | 0  | 0  | 32 | 98  | 50  | 141 | 28  | 19 | 200 | 0  |  |  |  |  |  |  |  |  |  |  |
| 113.20 | 67 | 0  | 0  | 18 | 72  | 13  | 15  | 43  | 16 | 219 | 5  |  |  |  |  |  |  |  |  |  |  |
| 113.31 | 45 | 0  | 0  | 0  | 80  | 40  | 0   | 138 | 19 | 269 | 6  |  |  |  |  |  |  |  |  |  |  |
| 113.41 | 56 | 0  | 10 | 21 | 79  | 53  | 123 | 113 | 20 | 328 | 0  |  |  |  |  |  |  |  |  |  |  |
| 113.50 | 18 | 0  | 0  | 0  | 41  | 48  | 116 | 35  | 47 | 196 | 0  |  |  |  |  |  |  |  |  |  |  |
| 113.60 | 34 | 0  | 0  | 20 | 115 | 58  | 39  | 158 | 72 | 215 | 8  |  |  |  |  |  |  |  |  |  |  |
| 113.71 | 49 | 0  | 0  | 7  | 110 | 76  | 0   | 110 | 34 | 309 | 13 |  |  |  |  |  |  |  |  |  |  |
| 113.81 | 46 | 0  | 0  | 8  | 92  | 108 | 91  | 131 | 34 | 348 | 0  |  |  |  |  |  |  |  |  |  |  |
| 113.91 | 29 | 0  | 0  | 31 | 77  | 73  | 0   | 4   | 34 | 340 | 0  |  |  |  |  |  |  |  |  |  |  |
| 114.01 | 36 | 0  | 0  | 22 | 124 | 104 | 111 | 16  | 32 | 409 | 12 |  |  |  |  |  |  |  |  |  |  |
| 114.10 | 47 | 0  | 0  | 33 | 77  | 58  | 0   | 57  | 29 | 303 | 17 |  |  |  |  |  |  |  |  |  |  |
| 114.20 | 48 | 0  | 0  | 6  | 94  | 56  | 35  | 0   | 13 | 320 | 7  |  |  |  |  |  |  |  |  |  |  |
| 114.31 | 48 | 8  | 0  | 4  | 102 | 73  | 0   | 99  | 37 | 366 | 0  |  |  |  |  |  |  |  |  |  |  |
| 114.40 | 19 | 0  | 0  | 15 | 44  | 65  | 52  | 96  | 39 | 320 | 22 |  |  |  |  |  |  |  |  |  |  |
| 114.51 | 36 | 0  | 0  | 0  | 71  | 8   | 48  | 60  | 40 | 61  | 0  |  |  |  |  |  |  |  |  |  |  |
| 114.60 | 29 | 0  | 0  | 9  | 54  | 59  | 47  | 83  | 23 | 291 | 0  |  |  |  |  |  |  |  |  |  |  |
| 114.70 | 39 | 0  | 0  | 0  | 62  | 12  | 57  | 45  | 27 | 175 | 5  |  |  |  |  |  |  |  |  |  |  |
| 114.81 | 39 | 0  | 0  | 14 | 105 | 58  | 75  | 46  | 40 | 153 | 13 |  |  |  |  |  |  |  |  |  |  |
| 114.91 | 36 | 0  | 0  | 0  | 71  | 47  | 85  | 34  | 41 | 241 | 8  |  |  |  |  |  |  |  |  |  |  |
| 115.00 | 40 | 0  | 0  | 0  | 88  | 79  | 88  | 12  | 8  | 312 | 8  |  |  |  |  |  |  |  |  |  |  |
| 115.11 | 21 | 0  | 0  | 17 | 116 | 44  | 86  | 138 | 40 | 260 | 0  |  |  |  |  |  |  |  |  |  |  |

|        |    |    |   |    |     |     |     |     |    |     |    |  |  |  |  |  |  |  |  |
|--------|----|----|---|----|-----|-----|-----|-----|----|-----|----|--|--|--|--|--|--|--|--|
| 115.21 | 13 | 0  | 0 | 0  | 100 | 84  | 66  | 72  | 34 | 207 | 25 |  |  |  |  |  |  |  |  |
| 115.31 | 14 | 0  | 0 | 0  | 73  | 75  | 10  | 0   | 0  | 265 | 16 |  |  |  |  |  |  |  |  |
| 115.40 | 43 | 0  | 0 | 15 | 83  | 95  | 55  | 56  | 0  | 287 | 0  |  |  |  |  |  |  |  |  |
| 115.50 | 42 | 0  | 0 | 12 | 106 | 41  | 9   | 0   | 26 | 509 | 5  |  |  |  |  |  |  |  |  |
| 115.61 | 38 | 0  | 0 | 18 | 99  | 95  | 14  | 75  | 21 | 388 | 15 |  |  |  |  |  |  |  |  |
| 115.71 | 41 | 11 | 0 | 0  | 61  | 69  | 0   | 0   | 40 | 517 | 18 |  |  |  |  |  |  |  |  |
| 115.80 | 39 | 0  | 0 | 21 | 64  | 26  | 34  | 27  | 36 | 312 | 0  |  |  |  |  |  |  |  |  |
| 115.91 | 18 | 0  | 0 | 0  | 64  | 67  | 23  | 0   | 13 | 260 | 4  |  |  |  |  |  |  |  |  |
| 116.01 | 50 | 0  | 0 | 0  | 106 | 33  | 123 | 106 | 26 | 250 | 0  |  |  |  |  |  |  |  |  |
| 116.11 | 55 | 0  | 0 | 58 | 97  | 102 | 88  | 133 | 58 | 39  | 0  |  |  |  |  |  |  |  |  |
| 116.21 | 32 | 17 | 0 | 18 | 71  | 100 | 66  | 22  | 42 | 160 | 0  |  |  |  |  |  |  |  |  |
| 116.31 | 47 | 0  | 0 | 21 | 79  | 77  | 143 | 54  | 18 | 318 | 0  |  |  |  |  |  |  |  |  |
| 116.41 | 30 | 0  | 0 | 10 | 82  | 49  | 10  | 94  | 42 | 204 | 10 |  |  |  |  |  |  |  |  |
| 116.50 | 21 | 0  | 0 | 0  | 67  | 14  | 17  | 91  | 44 | 282 | 16 |  |  |  |  |  |  |  |  |
| 116.61 | 60 | 0  | 0 | 11 | 53  | 51  | 139 | 0   | 14 | 76  | 18 |  |  |  |  |  |  |  |  |
| 116.71 | 45 | 0  | 0 | 18 | 97  | 81  | 17  | 59  | 33 | 408 | 10 |  |  |  |  |  |  |  |  |
| 116.80 | 27 | 0  | 0 | 18 | 79  | 94  | 97  | 0   | 40 | 309 | 18 |  |  |  |  |  |  |  |  |
| 116.91 | 30 | 0  | 0 | 40 | 74  | 71  | 150 | 113 | 47 | 314 | 0  |  |  |  |  |  |  |  |  |
| 117.00 | 20 | 0  | 0 | 20 | 63  | 57  | 71  | 0   | 0  | 166 | 0  |  |  |  |  |  |  |  |  |
| 117.11 | 44 | 0  | 0 | 28 | 99  | 84  | 66  | 60  | 40 | 44  | 9  |  |  |  |  |  |  |  |  |
| 117.21 | 61 | 0  | 0 | 27 | 71  | 46  | 89  | 0   | 42 | 207 | 0  |  |  |  |  |  |  |  |  |
| 117.31 | 16 | 5  | 0 | 5  | 55  | 31  | 69  | 110 | 31 | 280 | 0  |  |  |  |  |  |  |  |  |
| 117.41 | 39 | 10 | 0 | 27 | 73  | 50  | 87  | 71  | 26 | 151 | 6  |  |  |  |  |  |  |  |  |
| 117.51 | 15 | 0  | 0 | 13 | 59  | 70  | 33  | 49  | 19 | 213 | 0  |  |  |  |  |  |  |  |  |
| 117.61 | 31 | 0  | 0 | 0  | 51  | 74  | 0   | 181 | 41 | 238 | 0  |  |  |  |  |  |  |  |  |
| 117.70 | 53 | 0  | 0 | 0  | 102 | 69  | 78  | 116 | 24 | 237 | 15 |  |  |  |  |  |  |  |  |
| 117.81 | 50 | 12 | 0 | 8  | 111 | 88  | 54  | 0   | 17 | 305 | 0  |  |  |  |  |  |  |  |  |
| 117.91 | 26 | 0  | 0 | 50 | 68  | 101 | 0   | 57  | 30 | 367 | 26 |  |  |  |  |  |  |  |  |
| 118.01 | 29 | 0  | 0 | 25 | 83  | 103 | 153 | 54  | 38 | 519 | 0  |  |  |  |  |  |  |  |  |
| 118.10 | 36 | 0  | 0 | 0  | 103 | 105 | 36  | 65  | 40 | 77  | 0  |  |  |  |  |  |  |  |  |
| 118.20 | 24 | 0  | 0 | 36 | 89  | 42  | 63  | 151 | 0  | 390 | 0  |  |  |  |  |  |  |  |  |
| 118.31 | 33 | 0  | 0 | 32 | 106 | 73  | 28  | 68  | 33 | 264 | 0  |  |  |  |  |  |  |  |  |
| 118.40 | 26 | 0  | 0 | 14 | 58  | 56  | 158 | 0   | 23 | 201 | 0  |  |  |  |  |  |  |  |  |
| 118.51 | 34 | 0  | 0 | 9  | 80  | 96  | 59  | 15  | 46 | 376 | 9  |  |  |  |  |  |  |  |  |
| 118.61 | 40 | 0  | 0 | 0  | 86  | 79  | 22  | 73  | 55 | 284 | 11 |  |  |  |  |  |  |  |  |
| 118.70 | 44 | 0  | 0 | 0  | 35  | 77  | 121 | 0   | 34 | 201 | 8  |  |  |  |  |  |  |  |  |
| 118.81 | 26 | 0  | 0 | 41 | 74  | 101 | 39  | 78  | 27 | 227 | 0  |  |  |  |  |  |  |  |  |
| 118.90 | 51 | 24 | 0 | 0  | 76  | 31  | 156 | 144 | 45 | 180 | 0  |  |  |  |  |  |  |  |  |
| 119.01 | 56 | 0  | 0 | 0  | 95  | 60  | 185 | 156 | 8  | 179 | 23 |  |  |  |  |  |  |  |  |
| 119.11 | 20 | 0  | 0 | 30 | 49  | 67  | 27  | 157 | 31 | 120 | 0  |  |  |  |  |  |  |  |  |
| 119.20 | 46 | 0  | 0 | 0  | 78  | 68  | 127 | 122 | 26 | 107 | 0  |  |  |  |  |  |  |  |  |
| 119.31 | 43 | 8  | 0 | 0  | 41  | 47  | 92  | 52  | 49 | 200 | 0  |  |  |  |  |  |  |  |  |
| 119.40 | 52 | 0  | 0 | 26 | 68  | 68  | 104 | 141 | 45 | 27  | 11 |  |  |  |  |  |  |  |  |
| 119.51 | 55 | 0  | 0 | 23 | 58  | 19  | 60  | 111 | 23 | 282 | 0  |  |  |  |  |  |  |  |  |
| 119.61 | 36 | 0  | 0 | 18 | 108 | 68  | 65  | 0   | 33 | 146 | 21 |  |  |  |  |  |  |  |  |
| 119.71 | 68 | 0  | 0 | 14 | 45  | 98  | 0   | 58  | 40 | 267 | 25 |  |  |  |  |  |  |  |  |
| 119.81 | 65 | 0  | 0 | 13 | 67  | 105 | 19  | 141 | 60 | 273 | 22 |  |  |  |  |  |  |  |  |
| 119.90 | 40 | 0  | 0 | 12 | 98  | 77  | 113 | 100 | 22 | 241 | 0  |  |  |  |  |  |  |  |  |
| 120.00 | 41 | 0  | 0 | 17 | 51  | 70  | 48  | 136 | 25 | 351 | 11 |  |  |  |  |  |  |  |  |
| 120.11 | 36 | 0  | 0 | 26 | 64  | 40  | 0   | 22  | 27 | 186 | 8  |  |  |  |  |  |  |  |  |
| 120.21 | 0  | 0  | 0 | 0  | 98  | 210 | 23  | 0   | 41 | 284 | 0  |  |  |  |  |  |  |  |  |
| 120.31 | 44 | 0  | 0 | 24 | 82  | 338 | 47  | 0   | 60 | 206 | 0  |  |  |  |  |  |  |  |  |
| 120.41 | 57 | 0  | 0 | 55 | 107 | 122 | 105 | 78  | 48 | 486 | 0  |  |  |  |  |  |  |  |  |
| 120.51 | 32 | 0  | 0 | 6  | 74  | 89  | 95  | 0   | 37 | 296 | 15 |  |  |  |  |  |  |  |  |
| 120.61 | 33 | 0  | 0 | 16 | 86  | 59  | 133 | 40  | 47 | 209 | 0  |  |  |  |  |  |  |  |  |
| 120.71 | 61 | 0  | 0 | 13 | 63  | 71  | 106 | 104 | 49 | 269 | 7  |  |  |  |  |  |  |  |  |
| 120.81 | 37 | 9  | 0 | 50 | 83  | 58  | 25  | 56  | 58 | 225 | 25 |  |  |  |  |  |  |  |  |
| 120.91 | 22 | 0  | 0 | 12 | 27  | 36  | 20  | 61  | 33 | 248 | 0  |  |  |  |  |  |  |  |  |
| 121.01 | 38 | 0  | 0 | 0  | 42  | 0   | 0   | 236 | 28 | 275 | 0  |  |  |  |  |  |  |  |  |
| 121.10 | 56 | 0  | 0 | 20 | 81  | 58  | 146 | 108 | 28 | 128 | 0  |  |  |  |  |  |  |  |  |
| 121.20 | 50 | 0  | 0 | 5  | 71  | 75  | 133 | 53  | 20 | 0   | 5  |  |  |  |  |  |  |  |  |
| 121.31 | 64 | 0  | 0 | 0  | 65  | 36  | 14  | 86  | 42 | 163 | 0  |  |  |  |  |  |  |  |  |
| 121.41 | 49 | 0  | 0 | 36 | 43  | 66  | 41  | 0   | 8  | 205 | 0  |  |  |  |  |  |  |  |  |

[illegible]

[illegible]

|        |    |   |   |   |    |    |     |     |    |     |    |  |  |  |  |  |  |  |  |  |  |  |  |  |  |  |  |  |  |  |  |  |  |  |  |  |  |  |  |  |  |  |  |  |  |  |  |  |  |  |  |  |  |  |  |  |  |  |  |  |  |  |  |  |  |  |  |  |  |  |  |  |  |  |  |  |  |  |  |  |  |  |  |  |  |  |  |  |  |  |  |  |  |  |  |  |  |  |  |  |  |  |  |  |  |  |  |  |  |  |  |  |  |  |  |  |  |  |  |  |  |  |  |  |  |  |  |  |  |  |  |  |  |  |  |  |  |  |  |  |  |  |  |  |  |  |  |  |  |  |  |  |  |  |  |  |  |  |  |  |  |  |  |  |  |  |  |  |  |  |  |  |  |  |  |  |  |  |  |  |  |  |  |  |  |  |  |  |  |  |  |  |  |  |  |  |  |  |  |  |  |  |  |  |  |  |  |  |  |  |  |  |  |  |  |  |  |  |  |  |  |  |  |  |  |  |  |  |  |  |  |  |  |  |  |  |  |  |  |  |  |  |  |  |  |  |  |  |  |  |  |  |  |  |  |  |  |  |  |  |  |  |  |  |  |  |  |  |  |  |  |  |  |  |  |  |  |  |  |  |  |  |  |  |  |  |  |  |  |  |  |  |  |  |  |  |  |  |  |  |  |  |  |  |  |  |  |  |  |  |  |  |  |  |  |  |  |  |  |  |  |  |  |  |  |  |  |  |  |  |  |  |  |  |  |  |  |  |  |  |  |  |  |  |  |  |  |  |  |  |  |  |  |  |  |  |  |  |  |  |  |  |  |  |  |  |  |  |  |  |  |  |  |  |  |  |  |  |  |  |  |  |  |  |  |  |  |  |  |  |  |  |  |  |  |  |  |  |  |  |  |  |  |  |  |  |  |  |  |  |  |  |  |  |  |  |  |  |  |  |  |  |  |  |  |  |  |  |  |  |  |  |  |  |  |  |  |  |  |  |  |  |  |  |  |  |  |  |  |  |  |  |  |  |  |  |  |  |  |  |  |  |  |  |  |  |  |  |  |  |  |  |  |  |  |  |  |  |  |  |  |  |  |  |  |  |  |  |  |  |  |  |  |  |  |  |  |  |  |  |  |  |  |  |  |  |  |  |  |  |  |  |  |  |  |  |  |  |  |  |  |  |  |  |  |  |  |  |  |  |  |  |  |  |  |  |  |  |  |  |  |  |  |  |  |  |  |  |  |  |  |  |  |  |  |  |  |  |  |  |  |  |  |  |  |  |  |  |  |  |  |  |  |  |  |  |  |  |  |  |  |  |  |  |  |  |  |  |  |  |  |  |  |  |  |  |  |  |  |  |  |  |  |  |  |  |  |  |  |  |  |  |  |  |  |  |  |  |  |  |  |  |  |  |  |  |  |  |  |  |  |  |  |  |  |  |  |  |  |  |  |  |  |  |  |  |  |  |  |  |  |  |  |  |  |  |  |  |  |  |  |  |  |  |  |  |  |  |  |  |  |  |  |  |  |  |  |  |  |  |  |  |  |  |  |  |  |  |  |  |  |  |  |  |  |  |  |  |  |  |  |  |  |  |  |  |  |  |  |  |  |  |  |  |  |  |  |  |  |  |  |  |  |  |  |  |  |  |  |  |  |  |  |  |  |  |  |  |  |  |  |  |  |  |  |  |  |  |  |  |  |  |  |  |  |  |  |  |  |  |  |  |  |  |  |  |  |  |  |  |  |  |  |  |  |  |  |  |  |  |  |  |  |  |  |  |  |  |  |  |  |  |  |  |  |  |  |  |  |  |  |  |  |  |  |  |  |  |  |  |  |  |  |  |  |  |  |  |  |  |  |  |  |  |  |  |  |  |  |  |  |  |  |  |  |  |  |  |  |  |  |  |  |  |  |  |  |  |  |  |  |  |  |  |  |  |  |  |  |  |  |  |  |  |  |  |  |  |  |  |  |  |  |  |  |  |  |  |  |  |  |  |  |  |  |  |  |  |  |  |  |  |  |  |  |  |  |  |  |  |  |  |  |  |  |  |  |  |  |  |  |  |  |  |  |  |  |  |  |  |  |  |  |  |  |  |  |  |  |  |  |  |  |  |  |  |  |  |  |  |  |  |  |  |  |  |  |  |  |  |  |  |  |  |  |  |  |  |  |  |  |  |  |  |  |  |  |  |  |  |  |  |  |  |  |  |  |  |  |  |  |  |  |  |  |  |  |  |  |  |  |  |  |  |  |  |  |  |  |  |  |  |  |  |  |  |  |  |  |  |  |  |  |  |  |  |  |  |  |  |  |  |  |  |  |  |  |  |  |  |  |  |  |  |  |  |  |  |  |  |  |  |  |  |  |  |  |  |  |  |  |  |  |  |  |  |  |  |  |  |  |  |  |  |  |  |  |  |  |  |  |  |  |  |  |  |  |  |  |  |  |  |  |  |  |  |  |  |  |  |  |  |  |  |  |  |  |  |  |  |  |  |  |  |  |  |  |  |  |  |  |  |  |  |  |  |  |  |  |  |  |  |  |  |  |  |  |  |  |  |  |  |  |  |  |  |  |  |  |  |  |  |  |  |  |  |  |  |  |  |  |  |  |  |  |  |  |  |  |  |  |  |  |  |  |  |  |  |  |  |  |  |  |  |  |  |  |  |  |  |  |  |  |  |  |  |  |  |  |  |  |  |  |  |  |  |  |  |  |  |  |  |  |  |  |  |  |  |  |  |  |  |  |  |  |  |  |  |  |  |  |  |  |  |  |  |  |  |  |  |  |  |  |  |  |  |  |  |  |  |  |  |  |  |  |  |  |  |  |  |  |  |  |  |  |  |  |  |  |  |  |  |  |  |  |  |  |  |  |  |  |  |  |  |  |  |  |  |  |  |  |  |  |  |  |  |  |  |  |  |  |  |  |  |  |  |  |  |  |  |  |  |  |  |  |  |  |  |  |  |  |  |  |  |  |  |  |  |  |  |  |  |  |  |  |  |  |  |  |  |  |  |  |  |  |  |  |  |  |  |  |  |  |  |  |  |  |  |  |  |  |  |  |  |  |  |  |  |  |  |  |  |
|--------|----|---|---|---|----|----|-----|-----|----|-----|----|--|--|--|--|--|--|--|--|--|--|--|--|--|--|--|--|--|--|--|--|--|--|--|--|--|--|--|--|--|--|--|--|--|--|--|--|--|--|--|--|--|--|--|--|--|--|--|--|--|--|--|--|--|--|--|--|--|--|--|--|--|--|--|--|--|--|--|--|--|--|--|--|--|--|--|--|--|--|--|--|--|--|--|--|--|--|--|--|--|--|--|--|--|--|--|--|--|--|--|--|--|--|--|--|--|--|--|--|--|--|--|--|--|--|--|--|--|--|--|--|--|--|--|--|--|--|--|--|--|--|--|--|--|--|--|--|--|--|--|--|--|--|--|--|--|--|--|--|--|--|--|--|--|--|--|--|--|--|--|--|--|--|--|--|--|--|--|--|--|--|--|--|--|--|--|--|--|--|--|--|--|--|--|--|--|--|--|--|--|--|--|--|--|--|--|--|--|--|--|--|--|--|--|--|--|--|--|--|--|--|--|--|--|--|--|--|--|--|--|--|--|--|--|--|--|--|--|--|--|--|--|--|--|--|--|--|--|--|--|--|--|--|--|--|--|--|--|--|--|--|--|--|--|--|--|--|--|--|--|--|--|--|--|--|--|--|--|--|--|--|--|--|--|--|--|--|--|--|--|--|--|--|--|--|--|--|--|--|--|--|--|--|--|--|--|--|--|--|--|--|--|--|--|--|--|--|--|--|--|--|--|--|--|--|--|--|--|--|--|--|--|--|--|--|--|--|--|--|--|--|--|--|--|--|--|--|--|--|--|--|--|--|--|--|--|--|--|--|--|--|--|--|--|--|--|--|--|--|--|--|--|--|--|--|--|--|--|--|--|--|--|--|--|--|--|--|--|--|--|--|--|--|--|--|--|--|--|--|--|--|--|--|--|--|--|--|--|--|--|--|--|--|--|--|--|--|--|--|--|--|--|--|--|--|--|--|--|--|--|--|--|--|--|--|--|--|--|--|--|--|--|--|--|--|--|--|--|--|--|--|--|--|--|--|--|--|--|--|--|--|--|--|--|--|--|--|--|--|--|--|--|--|--|--|--|--|--|--|--|--|--|--|--|--|--|--|--|--|--|--|--|--|--|--|--|--|--|--|--|--|--|--|--|--|--|--|--|--|--|--|--|--|--|--|--|--|--|--|--|--|--|--|--|--|--|--|--|--|--|--|--|--|--|--|--|--|--|--|--|--|--|--|--|--|--|--|--|--|--|--|--|--|--|--|--|--|--|--|--|--|--|--|--|--|--|--|--|--|--|--|--|--|--|--|--|--|--|--|--|--|--|--|--|--|--|--|--|--|--|--|--|--|--|--|--|--|--|--|--|--|--|--|--|--|--|--|--|--|--|--|--|--|--|--|--|--|--|--|--|--|--|--|--|--|--|--|--|--|--|--|--|--|--|--|--|--|--|--|--|--|--|--|--|--|--|--|--|--|--|--|--|--|--|--|--|--|--|--|--|--|--|--|--|--|--|--|--|--|--|--|--|--|--|--|--|--|--|--|--|--|--|--|--|--|--|--|--|--|--|--|--|--|--|--|--|--|--|--|--|--|--|--|--|--|--|--|--|--|--|--|--|--|--|--|--|--|--|--|--|--|--|--|--|--|--|--|--|--|--|--|--|--|--|--|--|--|--|--|--|--|--|--|--|--|--|--|--|--|--|--|--|--|--|--|--|--|--|--|--|--|--|--|--|--|--|--|--|--|--|--|--|--|--|--|--|--|--|--|--|--|--|--|--|--|--|--|--|--|--|--|--|--|--|--|--|--|--|--|--|--|--|--|--|--|--|--|--|--|--|--|--|--|--|--|--|--|--|--|--|--|--|--|--|--|--|--|--|--|--|--|--|--|--|--|--|--|--|--|--|--|--|--|--|--|--|--|--|--|--|--|--|--|--|--|--|--|--|--|--|--|--|--|--|--|--|--|--|--|--|--|--|--|--|--|--|--|--|--|--|--|--|--|--|--|--|--|--|--|--|--|--|--|--|--|--|--|--|--|--|--|--|--|--|--|--|--|--|--|--|--|--|--|--|--|--|--|--|--|--|--|--|--|--|--|--|--|--|--|--|--|--|--|--|--|--|--|--|--|--|--|--|--|--|--|--|--|--|--|--|--|--|--|--|--|--|--|--|--|--|--|--|--|--|--|--|--|--|--|--|--|--|--|--|--|--|--|--|--|--|--|--|--|--|--|--|--|--|--|--|--|--|--|--|--|--|--|--|--|--|--|--|--|--|--|--|--|--|--|--|--|--|--|--|--|--|--|--|--|--|--|--|--|--|--|--|--|--|--|--|--|--|--|--|--|--|--|--|--|--|--|--|--|--|--|--|--|--|--|--|--|--|--|--|--|--|--|--|--|--|--|--|--|--|--|--|--|--|--|--|--|--|--|--|--|--|--|--|--|--|--|--|--|--|--|--|--|--|--|--|--|--|--|--|--|--|--|--|--|--|--|--|--|--|--|--|--|--|--|--|--|--|--|--|--|--|--|--|--|--|--|--|--|--|--|--|--|--|--|--|--|--|--|--|--|--|--|--|--|--|--|--|--|--|--|--|--|--|--|--|--|--|--|--|--|--|--|--|--|--|--|--|--|--|--|--|--|--|--|--|--|--|--|--|--|--|--|--|--|--|--|--|--|--|--|--|--|--|--|--|--|--|--|--|--|--|--|--|--|--|--|--|--|--|--|--|--|--|--|--|--|--|--|--|--|--|--|--|--|--|--|--|--|--|--|--|--|--|--|--|--|--|--|--|--|--|--|--|--|--|--|--|--|--|--|--|--|--|--|--|--|--|--|--|--|--|--|--|--|--|--|--|--|--|--|--|--|--|--|--|--|--|--|--|--|--|--|--|--|--|--|--|--|--|--|--|--|--|--|--|--|--|--|--|--|--|--|--|--|--|--|--|--|--|--|--|--|--|--|--|--|--|--|--|--|--|--|--|--|--|--|--|--|--|--|--|--|--|--|--|--|--|--|--|--|--|--|--|--|--|--|--|--|--|--|--|--|--|--|--|--|--|--|--|--|--|--|--|--|--|--|--|
| 134.11 | 63 | 0 | 0 | 4 | 45 | 24 | 120 | 118 | 22 | 290 | 13 |  |  |  |  |  |  |  |  |  |  |  |  |  |  |  |  |  |  |  |  |  |  |  |  |  |  |  |  |  |  |  |  |  |  |  |  |  |  |  |  |  |  |  |  |  |  |  |  |  |  |  |  |  |  |  |  |  |  |  |  |  |  |  |  |  |  |  |  |  |  |  |  |  |  |  |  |  |  |  |  |  |  |  |  |  |  |  |  |  |  |  |  |  |  |  |  |  |  |  |  |  |  |  |  |  |  |  |  |  |  |  |  |  |  |  |  |  |  |  |  |  |  |  |  |  |  |  |  |  |  |  |  |  |  |  |  |  |  |  |  |  |  |  |  |  |  |  |  |  |  |  |  |  |  |  |  |  |  |  |  |  |  |  |  |  |  |  |  |  |  |  |  |  |  |  |  |  |  |  |  |  |  |  |  |  |  |  |  |  |  |  |  |  |  |  |  |  |  |  |  |  |  |  |  |  |  |  |  |  |  |  |  |  |  |  |  |  |  |  |  |  |  |  |  |  |  |  |  |  |  |  |  |  |  |  |  |  |  |  |  |  |  |  |  |  |  |  |  |  |  |  |  |  |  |  |  |  |  |  |  |  |  |  |  |  |  |  |  |  |  |  |  |  |  |  |  |  |  |  |  |  |  |  |  |  |  |  |  |  |  |  |  |  |  |  |  |  |  |  |  |  |  |  |  |  |  |  |  |  |  |  |  |  |  |  |  |  |  |  |  |  |  |  |  |  |  |  |  |  |  |  |  |  |  |  |  |  |  |  |  |  |  |  |  |  |  |  |  |  |  |  |  |  |  |  |  |  |  |  |  |  |  |  |  |  |  |  |  |  |  |  |  |  |  |  |  |  |  |  |  |  |  |  |  |  |  |  |  |  |  |  |  |  |  |  |  |  |  |  |  |  |  |  |  |  |  |  |  |  |  |  |  |  |  |  |  |  |  |  |  |  |  |  |  |  |  |  |  |  |  |  |  |  |  |  |  |  |  |  |  |  |  |  |  |  |  |  |  |  |  |  |  |  |  |  |  |  |  |  |  |  |  |  |  |  |  |  |  |  |  |  |  |  |  |  |  |  |  |  |  |  |  |  |  |  |  |  |  |  |  |  |  |  |  |  |  |  |  |  |  |  |  |  |  |  |  |  |  |  |  |  |  |  |  |  |  |  |  |  |  |  |  |  |  |  |  |  |  |  |  |  |  |  |  |  |  |  |  |  |  |  |  |  |  |  |  |  |  |  |  |  |  |  |  |  |  |  |  |  |  |  |  |  |  |  |  |  |  |  |  |  |  |  |  |  |  |  |  |  |  |  |  |  |  |  |  |  |  |  |  |  |  |  |  |  |  |  |  |  |  |  |  |  |  |  |  |  |  |  |  |  |  |  |  |  |  |  |  |  |  |  |  |  |  |  |  |  |  |  |  |  |  |  |  |  |  |  |  |  |  |  |  |  |  |  |  |  |  |  |  |  |  |  |  |  |  |  |  |  |  |  |  |  |  |  |  |  |  |  |  |  |  |  |  |  |  |  |  |  |  |  |  |  |  |  |  |  |  |  |  |  |  |  |  |  |  |  |  |  |  |  |  |  |  |  |  |  |  |  |  |  |  |  |  |  |  |  |  |  |  |  |  |  |  |  |  |  |  |  |  |  |  |  |  |  |  |  |  |  |  |  |  |  |  |  |  |  |  |  |  |  |  |  |  |  |  |  |  |  |  |  |  |  |  |  |  |  |  |  |  |  |  |  |  |  |  |  |  |  |  |  |  |  |  |  |  |  |  |  |  |  |  |  |  |  |  |  |  |  |  |  |  |  |  |  |  |  |  |  |  |  |  |  |  |  |  |  |  |  |  |  |  |  |  |  |  |  |  |  |  |  |  |  |  |  |  |  |  |  |  |  |  |  |  |  |  |  |  |  |  |  |  |  |  |  |  |  |  |  |  |  |  |  |  |  |  |  |  |  |  |  |  |  |  |  |  |  |  |  |  |  |  |  |  |  |  |  |  |  |  |  |  |  |  |  |  |  |  |  |  |  |  |  |  |  |  |  |  |  |  |  |  |  |  |  |  |  |  |  |  |  |  |  |  |  |  |  |  |  |  |  |  |  |  |  |  |  |  |  |  |  |  |  |  |  |  |  |  |  |  |  |  |  |  |  |  |  |  |  |  |  |  |  |  |  |  |  |  |  |  |  |  |  |  |  |  |  |  |  |  |  |  |  |  |  |  |  |  |  |  |  |  |  |  |  |  |  |  |  |  |  |  |  |  |  |  |  |  |  |  |  |  |  |  |  |  |  |  |  |  |  |  |  |  |  |  |  |  |  |  |  |  |  |  |  |  |  |  |  |  |  |  |  |  |  |  |  |  |  |  |  |  |  |  |  |  |  |  |  |  |  |  |  |  |  |  |  |  |  |  |  |  |  |  |  |  |  |  |  |  |  |  |  |  |  |  |  |  |  |  |  |  |  |  |  |  |  |  |  |  |  |  |  |  |  |  |  |  |  |  |  |  |  |  |  |  |  |  |  |  |  |  |  |  |  |  |  |  |  |  |  |  |  |  |  |  |  |  |  |  |  |  |  |  |  |  |  |  |  |  |  |  |  |  |  |  |  |  |  |  |  |  |  |  |  |  |  |  |  |  |  |  |  |  |  |  |  |  |  |  |  |  |  |  |  |  |  |  |  |  |  |  |  |  |  |  |  |  |  |  |  |  |  |  |  |  |  |  |  |  |  |  |  |  |  |  |  |  |  |  |  |  |  |  |  |  |  |  |  |  |  |  |  |  |  |  |  |  |  |  |  |  |  |  |  |  |  |  |  |  |  |  |  |  |  |  |  |  |  |  |  |  |  |  |  |  |  |  |  |  |  |  |  |  |  |  |  |  |  |  |  |  |  |  |  |  |  |  |  |  |  |  |  |  |  |  |  |  |  |  |  |  |  |  |  |  |  |  |  |  |  |  |  |  |  |  |  |  |  |  |  |  |  |  |  |  |  |  |  |  |  |  |  |  |  |  |  |  |  |  |  |  |  |  |  |  |  |  |  |  |  |
|--------|----|---|---|---|----|----|-----|-----|----|-----|----|--|--|--|--|--|--|--|--|--|--|--|--|--|--|--|--|--|--|--|--|--|--|--|--|--|--|--|--|--|--|--|--|--|--|--|--|--|--|--|--|--|--|--|--|--|--|--|--|--|--|--|--|--|--|--|--|--|--|--|--|--|--|--|--|--|--|--|--|--|--|--|--|--|--|--|--|--|--|--|--|--|--|--|--|--|--|--|--|--|--|--|--|--|--|--|--|--|--|--|--|--|--|--|--|--|--|--|--|--|--|--|--|--|--|--|--|--|--|--|--|--|--|--|--|--|--|--|--|--|--|--|--|--|--|--|--|--|--|--|--|--|--|--|--|--|--|--|--|--|--|--|--|--|--|--|--|--|--|--|--|--|--|--|--|--|--|--|--|--|--|--|--|--|--|--|--|--|--|--|--|--|--|--|--|--|--|--|--|--|--|--|--|--|--|--|--|--|--|--|--|--|--|--|--|--|--|--|--|--|--|--|--|--|--|--|--|--|--|--|--|--|--|--|--|--|--|--|--|--|--|--|--|--|--|--|--|--|--|--|--|--|--|--|--|--|--|--|--|--|--|--|--|--|--|--|--|--|--|--|--|--|--|--|--|--|--|--|--|--|--|--|--|--|--|--|--|--|--|--|--|--|--|--|--|--|--|--|--|--|--|--|--|--|--|--|--|--|--|--|--|--|--|--|--|--|--|--|--|--|--|--|--|--|--|--|--|--|--|--|--|--|--|--|--|--|--|--|--|--|--|--|--|--|--|--|--|--|--|--|--|--|--|--|--|--|--|--|--|--|--|--|--|--|--|--|--|--|--|--|--|--|--|--|--|--|--|--|--|--|--|--|--|--|--|--|--|--|--|--|--|--|--|--|--|--|--|--|--|--|--|--|--|--|--|--|--|--|--|--|--|--|--|--|--|--|--|--|--|--|--|--|--|--|--|--|--|--|--|--|--|--|--|--|--|--|--|--|--|--|--|--|--|--|--|--|--|--|--|--|--|--|--|--|--|--|--|--|--|--|--|--|--|--|--|--|--|--|--|--|--|--|--|--|--|--|--|--|--|--|--|--|--|--|--|--|--|--|--|--|--|--|--|--|--|--|--|--|--|--|--|--|--|--|--|--|--|--|--|--|--|--|--|--|--|--|--|--|--|--|--|--|--|--|--|--|--|--|--|--|--|--|--|--|--|--|--|--|--|--|--|--|--|--|--|--|--|--|--|--|--|--|--|--|--|--|--|--|--|--|--|--|--|--|--|--|--|--|--|--|--|--|--|--|--|--|--|--|--|--|--|--|--|--|--|--|--|--|--|--|--|--|--|--|--|--|--|--|--|--|--|--|--|--|--|--|--|--|--|--|--|--|--|--|--|--|--|--|--|--|--|--|--|--|--|--|--|--|--|--|--|--|--|--|--|--|--|--|--|--|--|--|--|--|--|--|--|--|--|--|--|--|--|--|--|--|--|--|--|--|--|--|--|--|--|--|--|--|--|--|--|--|--|--|--|--|--|--|--|--|--|--|--|--|--|--|--|--|--|--|--|--|--|--|--|--|--|--|--|--|--|--|--|--|--|--|--|--|--|--|--|--|--|--|--|--|--|--|--|--|--|--|--|--|--|--|--|--|--|--|--|--|--|--|--|--|--|--|--|--|--|--|--|--|--|--|--|--|--|--|--|--|--|--|--|--|--|--|--|--|--|--|--|--|--|--|--|--|--|--|--|--|--|--|--|--|--|--|--|--|--|--|--|--|--|--|--|--|--|--|--|--|--|--|--|--|--|--|--|--|--|--|--|--|--|--|--|--|--|--|--|--|--|--|--|--|--|--|--|--|--|--|--|--|--|--|--|--|--|--|--|--|--|--|--|--|--|--|--|--|--|--|--|--|--|--|--|--|--|--|--|--|--|--|--|--|--|--|--|--|--|--|--|--|--|--|--|--|--|--|--|--|--|--|--|--|--|--|--|--|--|--|--|--|--|--|--|--|--|--|--|--|--|--|--|--|--|--|--|--|--|--|--|--|--|--|--|--|--|--|--|--|--|--|--|--|--|--|--|--|--|--|--|--|--|--|--|--|--|--|--|--|--|--|--|--|--|--|--|--|--|--|--|--|--|--|--|--|--|--|--|--|--|--|--|--|--|--|--|--|--|--|--|--|--|--|--|--|--|--|--|--|--|--|--|--|--|--|--|--|--|--|--|--|--|--|--|--|--|--|--|--|--|--|--|--|--|--|--|--|--|--|--|--|--|--|--|--|--|--|--|--|--|--|--|--|--|--|--|--|--|--|--|--|--|--|--|--|--|--|--|--|--|--|--|--|--|--|--|--|--|--|--|--|--|--|--|--|--|--|--|--|--|--|--|--|--|--|--|--|--|--|--|--|--|--|--|--|--|--|--|--|--|--|--|--|--|--|--|--|--|--|--|--|--|--|--|--|--|--|--|--|--|--|--|--|--|--|--|--|--|--|--|--|--|--|--|--|--|--|--|--|--|--|--|--|--|--|--|--|--|--|--|--|--|--|--|--|--|--|--|--|--|--|--|--|--|--|--|--|--|--|--|--|--|--|--|--|--|--|--|--|--|--|--|--|--|--|--|--|--|--|--|--|--|--|--|--|--|--|--|--|--|--|--|--|--|--|--|--|--|--|--|--|--|--|--|--|--|--|--|--|--|--|--|--|--|--|--|--|--|--|--|--|--|--|--|--|--|--|--|--|--|--|--|--|--|--|--|--|--|--|--|--|--|--|--|--|--|--|--|--|--|--|--|--|--|--|--|--|--|--|--|--|--|--|--|--|--|--|--|--|--|--|--|--|--|--|--|--|--|--|--|--|--|--|--|--|--|--|--|--|--|--|--|--|--|--|--|--|--|--|--|--|--|--|--|--|--|--|--|--|--|--|--|--|--|--|--|--|--|--|--|--|--|--|--|--|--|--|--|--|--|--|--|--|--|--|--|--|--|--|--|--|--|--|--|--|--|--|--|--|--|--|--|--|--|--|--|--|--|--|--|--|--|--|--|--|--|--|--|--|--|--|--|--|--|--|--|--|--|--|

[illegible]

[illegible]

[illegible]

|        |    |   |   |   |    |    |   |   |    |     |   |  |  |  |  |  |  |  |  |  |  |  |  |  |  |  |  |  |  |  |  |  |  |  |  |  |  |  |  |  |  |  |  |  |  |  |  |  |  |  |  |  |  |  |  |  |  |  |  |  |  |  |  |  |  |  |  |  |  |  |  |  |  |  |  |  |  |  |  |  |  |  |  |  |  |  |  |  |  |  |  |  |  |  |  |  |  |  |  |  |  |  |  |  |  |  |  |  |  |  |  |  |  |  |  |  |  |  |  |  |  |  |  |  |  |  |  |  |  |  |  |  |  |  |  |  |  |  |  |  |  |  |  |  |  |  |  |  |  |  |  |  |  |  |  |  |  |  |  |  |  |  |  |  |  |  |  |  |  |  |  |  |  |  |  |  |  |  |  |  |  |  |  |  |  |  |  |  |  |  |  |  |  |  |  |  |  |  |  |  |  |  |  |  |  |  |  |  |  |  |  |  |  |  |  |  |  |  |  |  |  |  |  |  |  |  |  |  |  |  |  |  |  |  |  |  |  |  |  |  |  |  |  |  |  |  |  |  |  |  |  |  |  |  |  |  |  |  |  |  |  |  |  |  |  |  |  |  |  |  |  |  |  |  |  |  |  |  |  |  |  |  |  |  |  |  |  |  |  |  |  |  |  |  |  |  |  |  |  |  |  |  |  |  |  |  |  |  |  |  |  |  |  |  |  |  |  |  |  |  |  |  |  |  |  |  |  |  |  |  |  |  |  |  |  |  |  |  |  |  |  |  |  |  |  |  |  |  |  |  |  |  |  |  |  |  |  |  |  |  |  |  |  |  |  |  |  |  |  |  |  |  |  |  |  |  |  |  |  |  |  |  |  |  |  |  |  |  |  |  |  |  |  |  |  |  |  |  |  |  |  |  |  |  |  |  |  |  |  |  |  |  |  |  |  |  |  |  |  |  |  |  |  |  |  |  |  |  |  |  |  |  |  |  |  |  |  |  |  |  |  |  |  |  |  |  |  |  |  |  |  |  |  |  |  |  |  |  |  |  |  |  |  |  |  |  |  |  |  |  |  |  |  |  |  |  |  |  |  |  |  |  |  |  |  |  |  |  |  |  |  |  |  |  |  |  |  |  |  |  |  |  |  |  |  |  |  |  |  |  |  |  |  |  |  |  |  |  |  |  |  |  |  |  |  |  |  |  |  |  |  |  |  |  |  |  |  |  |  |  |  |  |  |  |  |  |  |  |  |  |  |  |  |  |  |  |  |  |  |  |  |  |  |  |  |  |  |  |  |  |  |  |  |  |  |  |  |  |  |  |  |  |  |  |  |  |  |  |  |  |  |  |  |  |  |  |  |  |  |  |  |  |  |  |  |  |  |  |  |  |  |  |  |  |  |  |  |  |  |  |  |  |  |  |  |  |  |  |  |  |  |  |  |  |  |  |  |  |  |  |  |  |  |  |  |  |  |  |  |  |  |  |  |  |  |  |  |  |  |  |  |  |  |  |  |  |  |  |  |  |  |  |  |  |  |  |  |  |  |  |  |  |  |  |  |  |  |  |  |  |  |  |  |  |  |  |  |  |  |  |  |  |  |  |  |  |  |  |  |  |  |  |  |  |  |  |  |  |  |  |  |  |  |  |  |  |  |  |  |  |  |  |  |  |  |  |  |  |  |  |  |  |  |  |  |  |  |  |  |  |  |  |  |  |  |  |  |  |  |  |  |  |  |  |  |  |  |  |  |  |  |  |  |  |  |  |  |  |  |  |  |  |  |  |  |  |  |  |  |  |  |  |  |  |  |  |  |  |  |  |  |  |  |  |  |  |  |  |  |  |  |  |  |  |  |  |  |  |  |  |  |  |  |  |  |  |  |  |  |  |  |  |  |  |  |  |  |  |  |  |  |  |  |  |  |  |  |  |  |  |  |  |  |  |  |  |  |  |  |  |  |  |  |  |  |  |  |  |  |  |  |  |  |  |  |  |  |  |  |  |  |  |  |  |  |  |  |  |  |  |  |  |  |  |  |  |  |  |  |  |  |  |  |  |  |  |  |  |  |  |  |  |  |  |  |  |  |  |  |  |  |  |  |  |  |  |  |  |  |  |  |  |  |  |  |  |  |  |  |  |  |  |  |  |  |  |  |  |  |  |  |  |  |  |  |  |  |  |  |  |  |  |  |  |  |  |  |  |  |  |  |  |  |  |  |  |  |  |  |  |  |  |  |  |  |  |  |  |  |  |  |  |  |  |  |  |  |  |  |  |  |  |  |  |  |  |  |  |  |  |  |  |  |  |  |  |  |  |  |  |  |  |  |  |  |  |  |  |  |  |  |  |  |  |  |  |  |  |  |  |  |  |  |  |  |  |  |  |  |  |  |  |  |  |  |  |  |  |  |  |  |  |  |  |  |  |  |  |  |  |  |  |  |  |  |  |  |  |  |  |  |  |  |  |  |  |  |  |  |  |  |  |  |  |  |  |  |  |  |  |  |  |  |  |  |  |  |  |  |  |  |  |  |  |  |  |  |  |  |  |  |  |  |  |  |  |  |  |  |  |  |  |  |  |  |  |  |  |  |  |  |  |  |  |  |  |  |  |  |  |  |  |  |  |  |  |  |  |  |  |  |  |  |  |  |  |  |  |  |  |  |  |  |  |  |  |  |  |  |  |  |  |  |  |  |  |  |  |  |  |  |  |  |  |  |  |  |  |  |  |  |  |  |  |  |  |  |  |  |  |  |  |  |  |  |  |  |  |  |  |  |  |  |  |  |  |  |  |  |  |  |  |  |  |  |  |  |  |  |  |  |  |  |  |  |  |  |  |  |  |  |  |  |  |  |  |  |  |  |  |  |  |  |  |  |  |  |  |  |  |  |  |  |  |  |  |  |  |  |  |  |  |  |  |  |  |  |  |  |  |  |  |  |  |  |  |  |  |  |  |  |  |  |  |  |  |  |  |  |  |  |  |  |  |  |  |  |  |  |  |  |  |  |  |  |  |  |  |  |  |  |  |  |  |  |  |  |  |  |  |  |  |  |  |  |  |  |  |  |  |  |  |  |  |  |  |  |  |  |  |  |  |
|--------|----|---|---|---|----|----|---|---|----|-----|---|--|--|--|--|--|--|--|--|--|--|--|--|--|--|--|--|--|--|--|--|--|--|--|--|--|--|--|--|--|--|--|--|--|--|--|--|--|--|--|--|--|--|--|--|--|--|--|--|--|--|--|--|--|--|--|--|--|--|--|--|--|--|--|--|--|--|--|--|--|--|--|--|--|--|--|--|--|--|--|--|--|--|--|--|--|--|--|--|--|--|--|--|--|--|--|--|--|--|--|--|--|--|--|--|--|--|--|--|--|--|--|--|--|--|--|--|--|--|--|--|--|--|--|--|--|--|--|--|--|--|--|--|--|--|--|--|--|--|--|--|--|--|--|--|--|--|--|--|--|--|--|--|--|--|--|--|--|--|--|--|--|--|--|--|--|--|--|--|--|--|--|--|--|--|--|--|--|--|--|--|--|--|--|--|--|--|--|--|--|--|--|--|--|--|--|--|--|--|--|--|--|--|--|--|--|--|--|--|--|--|--|--|--|--|--|--|--|--|--|--|--|--|--|--|--|--|--|--|--|--|--|--|--|--|--|--|--|--|--|--|--|--|--|--|--|--|--|--|--|--|--|--|--|--|--|--|--|--|--|--|--|--|--|--|--|--|--|--|--|--|--|--|--|--|--|--|--|--|--|--|--|--|--|--|--|--|--|--|--|--|--|--|--|--|--|--|--|--|--|--|--|--|--|--|--|--|--|--|--|--|--|--|--|--|--|--|--|--|--|--|--|--|--|--|--|--|--|--|--|--|--|--|--|--|--|--|--|--|--|--|--|--|--|--|--|--|--|--|--|--|--|--|--|--|--|--|--|--|--|--|--|--|--|--|--|--|--|--|--|--|--|--|--|--|--|--|--|--|--|--|--|--|--|--|--|--|--|--|--|--|--|--|--|--|--|--|--|--|--|--|--|--|--|--|--|--|--|--|--|--|--|--|--|--|--|--|--|--|--|--|--|--|--|--|--|--|--|--|--|--|--|--|--|--|--|--|--|--|--|--|--|--|--|--|--|--|--|--|--|--|--|--|--|--|--|--|--|--|--|--|--|--|--|--|--|--|--|--|--|--|--|--|--|--|--|--|--|--|--|--|--|--|--|--|--|--|--|--|--|--|--|--|--|--|--|--|--|--|--|--|--|--|--|--|--|--|--|--|--|--|--|--|--|--|--|--|--|--|--|--|--|--|--|--|--|--|--|--|--|--|--|--|--|--|--|--|--|--|--|--|--|--|--|--|--|--|--|--|--|--|--|--|--|--|--|--|--|--|--|--|--|--|--|--|--|--|--|--|--|--|--|--|--|--|--|--|--|--|--|--|--|--|--|--|--|--|--|--|--|--|--|--|--|--|--|--|--|--|--|--|--|--|--|--|--|--|--|--|--|--|--|--|--|--|--|--|--|--|--|--|--|--|--|--|--|--|--|--|--|--|--|--|--|--|--|--|--|--|--|--|--|--|--|--|--|--|--|--|--|--|--|--|--|--|--|--|--|--|--|--|--|--|--|--|--|--|--|--|--|--|--|--|--|--|--|--|--|--|--|--|--|--|--|--|--|--|--|--|--|--|--|--|--|--|--|--|--|--|--|--|--|--|--|--|--|--|--|--|--|--|--|--|--|--|--|--|--|--|--|--|--|--|--|--|--|--|--|--|--|--|--|--|--|--|--|--|--|--|--|--|--|--|--|--|--|--|--|--|--|--|--|--|--|--|--|--|--|--|--|--|--|--|--|--|--|--|--|--|--|--|--|--|--|--|--|--|--|--|--|--|--|--|--|--|--|--|--|--|--|--|--|--|--|--|--|--|--|--|--|--|--|--|--|--|--|--|--|--|--|--|--|--|--|--|--|--|--|--|--|--|--|--|--|--|--|--|--|--|--|--|--|--|--|--|--|--|--|--|--|--|--|--|--|--|--|--|--|--|--|--|--|--|--|--|--|--|--|--|--|--|--|--|--|--|--|--|--|--|--|--|--|--|--|--|--|--|--|--|--|--|--|--|--|--|--|--|--|--|--|--|--|--|--|--|--|--|--|--|--|--|--|--|--|--|--|--|--|--|--|--|--|--|--|--|--|--|--|--|--|--|--|--|--|--|--|--|--|--|--|--|--|--|--|--|--|--|--|--|--|--|--|--|--|--|--|--|--|--|--|--|--|--|--|--|--|--|--|--|--|--|--|--|--|--|--|--|--|--|--|--|--|--|--|--|--|--|--|--|--|--|--|--|--|--|--|--|--|--|--|--|--|--|--|--|--|--|--|--|--|--|--|--|--|--|--|--|--|--|--|--|--|--|--|--|--|--|--|--|--|--|--|--|--|--|--|--|--|--|--|--|--|--|--|--|--|--|--|--|--|--|--|--|--|--|--|--|--|--|--|--|--|--|--|--|--|--|--|--|--|--|--|--|--|--|--|--|--|--|--|--|--|--|--|--|--|--|--|--|--|--|--|--|--|--|--|--|--|--|--|--|--|--|--|--|--|--|--|--|--|--|--|--|--|--|--|--|--|--|--|--|--|--|--|--|--|--|--|--|--|--|--|--|--|--|--|--|--|--|--|--|--|--|--|--|--|--|--|--|--|--|--|--|--|--|--|--|--|--|--|--|--|--|--|--|--|--|--|--|--|--|--|--|--|--|--|--|--|--|--|--|--|--|--|--|--|--|--|--|--|--|--|--|--|--|--|--|--|--|--|--|--|--|--|--|--|--|--|--|--|--|--|--|--|--|--|--|--|--|--|--|--|--|--|--|--|--|--|--|--|--|--|--|--|--|--|--|--|--|--|--|--|--|--|--|--|--|--|--|--|--|--|--|--|--|--|--|--|--|--|--|--|--|--|--|--|--|--|--|--|--|--|--|--|--|--|--|--|--|--|--|--|--|--|--|--|--|--|--|--|--|--|--|--|--|--|--|--|--|--|--|--|--|--|--|--|--|--|--|--|--|--|--|--|--|--|--|--|--|--|--|--|--|--|--|--|--|--|--|--|--|--|--|--|--|--|--|--|--|--|--|--|--|--|--|--|--|--|--|--|--|--|--|--|--|--|--|--|--|--|--|--|
| 159.30 | 24 | 0 | 0 | 9 | 83 | 86 | 0 | 0 | 44 | 576 | 9 |  |  |  |  |  |  |  |  |  |  |  |  |  |  |  |  |  |  |  |  |  |  |  |  |  |  |  |  |  |  |  |  |  |  |  |  |  |  |  |  |  |  |  |  |  |  |  |  |  |  |  |  |  |  |  |  |  |  |  |  |  |  |  |  |  |  |  |  |  |  |  |  |  |  |  |  |  |  |  |  |  |  |  |  |  |  |  |  |  |  |  |  |  |  |  |  |  |  |  |  |  |  |  |  |  |  |  |  |  |  |  |  |  |  |  |  |  |  |  |  |  |  |  |  |  |  |  |  |  |  |  |  |  |  |  |  |  |  |  |  |  |  |  |  |  |  |  |  |  |  |  |  |  |  |  |  |  |  |  |  |  |  |  |  |  |  |  |  |  |  |  |  |  |  |  |  |  |  |  |  |  |  |  |  |  |  |  |  |  |  |  |  |  |  |  |  |  |  |  |  |  |  |  |  |  |  |  |  |  |  |  |  |  |  |  |  |  |  |  |  |  |  |  |  |  |  |  |  |  |  |  |  |  |  |  |  |  |  |  |  |  |  |  |  |  |  |  |  |  |  |  |  |  |  |  |  |  |  |  |  |  |  |  |  |  |  |  |  |  |  |  |  |  |  |  |  |  |  |  |  |  |  |  |  |  |  |  |  |  |  |  |  |  |  |  |  |  |  |  |  |  |  |  |  |  |  |  |  |  |  |  |  |  |  |  |  |  |  |  |  |  |  |  |  |  |  |  |  |  |  |  |  |  |  |  |  |  |  |  |  |  |  |  |  |  |  |  |  |  |  |  |  |  |  |  |  |  |  |  |  |  |  |  |  |  |  |  |  |  |  |  |  |  |  |  |  |  |  |  |  |  |  |  |  |  |  |  |  |  |  |  |  |  |  |  |  |  |  |  |  |  |  |  |  |  |  |  |  |  |  |  |  |  |  |  |  |  |  |  |  |  |  |  |  |  |  |  |  |  |  |  |  |  |  |  |  |  |  |  |  |  |  |  |  |  |  |  |  |  |  |  |  |  |  |  |  |  |  |  |  |  |  |  |  |  |  |  |  |  |  |  |  |  |  |  |  |  |  |  |  |  |  |  |  |  |  |  |  |  |  |  |  |  |  |  |  |  |  |  |  |  |  |  |  |  |  |  |  |  |  |  |  |  |  |  |  |  |  |  |  |  |  |  |  |  |  |  |  |  |  |  |  |  |  |  |  |  |  |  |  |  |  |  |  |  |  |  |  |  |  |  |  |  |  |  |  |  |  |  |  |  |  |  |  |  |  |  |  |  |  |  |  |  |  |  |  |  |  |  |  |  |  |  |  |  |  |  |  |  |  |  |  |  |  |  |  |  |  |  |  |  |  |  |  |  |  |  |  |  |  |  |  |  |  |  |  |  |  |  |  |  |  |  |  |  |  |  |  |  |  |  |  |  |  |  |  |  |  |  |  |  |  |  |  |  |  |  |  |  |  |  |  |  |  |  |  |  |  |  |  |  |  |  |  |  |  |  |  |  |  |  |  |  |  |  |  |  |  |  |  |  |  |  |  |  |  |  |  |  |  |  |  |  |  |  |  |  |  |  |  |  |  |  |  |  |  |  |  |  |  |  |  |  |  |  |  |  |  |  |  |  |  |  |  |  |  |  |  |  |  |  |  |  |  |  |  |  |  |  |  |  |  |  |  |  |  |  |  |  |  |  |  |  |  |  |  |  |  |  |  |  |  |  |  |  |  |  |  |  |  |  |  |  |  |  |  |  |  |  |  |  |  |  |  |  |  |  |  |  |  |  |  |  |  |  |  |  |  |  |  |  |  |  |  |  |  |  |  |  |  |  |  |  |  |  |  |  |  |  |  |  |  |  |  |  |  |  |  |  |  |  |  |  |  |  |  |  |  |  |  |  |  |  |  |  |  |  |  |  |  |  |  |  |  |  |  |  |  |  |  |  |  |  |  |  |  |  |  |  |  |  |  |  |  |  |  |  |  |  |  |  |  |  |  |  |  |  |  |  |  |  |  |  |  |  |  |  |  |  |  |  |  |  |  |  |  |  |  |  |  |  |  |  |  |  |  |  |  |  |  |  |  |  |  |  |  |  |  |  |  |  |  |  |  |  |  |  |  |  |  |  |  |  |  |  |  |  |  |  |  |  |  |  |  |  |  |  |  |  |  |  |  |  |  |  |  |  |  |  |  |  |  |  |  |  |  |  |  |  |  |  |  |  |  |  |  |  |  |  |  |  |  |  |  |  |  |  |  |  |  |  |  |  |  |  |  |  |  |  |  |  |  |  |  |  |  |  |  |  |  |  |  |  |  |  |  |  |  |  |  |  |  |  |  |  |  |  |  |  |  |  |  |  |  |  |  |  |  |  |  |  |  |  |  |  |  |  |  |  |  |  |  |  |  |  |  |  |  |  |  |  |  |  |  |  |  |  |  |  |  |  |  |  |  |  |  |  |  |  |  |  |  |  |  |  |  |  |  |  |  |  |  |  |  |  |  |  |  |  |  |  |  |  |  |  |  |  |  |  |  |  |  |  |  |  |  |  |  |  |  |  |  |  |  |  |  |  |  |  |  |  |  |  |  |  |  |  |  |  |  |  |  |  |  |  |  |  |  |  |  |  |  |  |  |  |  |  |  |  |  |  |  |  |  |  |  |  |  |  |  |  |  |  |  |  |  |  |  |  |  |  |  |  |  |  |  |  |  |  |  |  |  |  |  |  |  |  |  |  |  |  |  |  |  |  |  |  |  |  |  |  |  |  |  |  |  |  |  |  |  |  |  |  |  |  |  |  |  |  |  |  |  |  |  |  |  |  |  |  |  |  |  |  |  |  |  |  |  |  |  |  |  |  |  |  |  |  |  |  |  |  |  |  |  |  |  |  |  |  |  |  |  |  |  |  |  |  |  |  |  |  |  |  |  |  |  |  |  |  |  |  |  |  |  |  |  |  |  |  |  |  |  |  |  |  |  |  |  |  |  |  |  |  |  |  |  |  |  |  |  |  |  |  |  |  |  |  |  |  |  |  |  |  |  |  |  |  |  |  |  |  |
|--------|----|---|---|---|----|----|---|---|----|-----|---|--|--|--|--|--|--|--|--|--|--|--|--|--|--|--|--|--|--|--|--|--|--|--|--|--|--|--|--|--|--|--|--|--|--|--|--|--|--|--|--|--|--|--|--|--|--|--|--|--|--|--|--|--|--|--|--|--|--|--|--|--|--|--|--|--|--|--|--|--|--|--|--|--|--|--|--|--|--|--|--|--|--|--|--|--|--|--|--|--|--|--|--|--|--|--|--|--|--|--|--|--|--|--|--|--|--|--|--|--|--|--|--|--|--|--|--|--|--|--|--|--|--|--|--|--|--|--|--|--|--|--|--|--|--|--|--|--|--|--|--|--|--|--|--|--|--|--|--|--|--|--|--|--|--|--|--|--|--|--|--|--|--|--|--|--|--|--|--|--|--|--|--|--|--|--|--|--|--|--|--|--|--|--|--|--|--|--|--|--|--|--|--|--|--|--|--|--|--|--|--|--|--|--|--|--|--|--|--|--|--|--|--|--|--|--|--|--|--|--|--|--|--|--|--|--|--|--|--|--|--|--|--|--|--|--|--|--|--|--|--|--|--|--|--|--|--|--|--|--|--|--|--|--|--|--|--|--|--|--|--|--|--|--|--|--|--|--|--|--|--|--|--|--|--|--|--|--|--|--|--|--|--|--|--|--|--|--|--|--|--|--|--|--|--|--|--|--|--|--|--|--|--|--|--|--|--|--|--|--|--|--|--|--|--|--|--|--|--|--|--|--|--|--|--|--|--|--|--|--|--|--|--|--|--|--|--|--|--|--|--|--|--|--|--|--|--|--|--|--|--|--|--|--|--|--|--|--|--|--|--|--|--|--|--|--|--|--|--|--|--|--|--|--|--|--|--|--|--|--|--|--|--|--|--|--|--|--|--|--|--|--|--|--|--|--|--|--|--|--|--|--|--|--|--|--|--|--|--|--|--|--|--|--|--|--|--|--|--|--|--|--|--|--|--|--|--|--|--|--|--|--|--|--|--|--|--|--|--|--|--|--|--|--|--|--|--|--|--|--|--|--|--|--|--|--|--|--|--|--|--|--|--|--|--|--|--|--|--|--|--|--|--|--|--|--|--|--|--|--|--|--|--|--|--|--|--|--|--|--|--|--|--|--|--|--|--|--|--|--|--|--|--|--|--|--|--|--|--|--|--|--|--|--|--|--|--|--|--|--|--|--|--|--|--|--|--|--|--|--|--|--|--|--|--|--|--|--|--|--|--|--|--|--|--|--|--|--|--|--|--|--|--|--|--|--|--|--|--|--|--|--|--|--|--|--|--|--|--|--|--|--|--|--|--|--|--|--|--|--|--|--|--|--|--|--|--|--|--|--|--|--|--|--|--|--|--|--|--|--|--|--|--|--|--|--|--|--|--|--|--|--|--|--|--|--|--|--|--|--|--|--|--|--|--|--|--|--|--|--|--|--|--|--|--|--|--|--|--|--|--|--|--|--|--|--|--|--|--|--|--|--|--|--|--|--|--|--|--|--|--|--|--|--|--|--|--|--|--|--|--|--|--|--|--|--|--|--|--|--|--|--|--|--|--|--|--|--|--|--|--|--|--|--|--|--|--|--|--|--|--|--|--|--|--|--|--|--|--|--|--|--|--|--|--|--|--|--|--|--|--|--|--|--|--|--|--|--|--|--|--|--|--|--|--|--|--|--|--|--|--|--|--|--|--|--|--|--|--|--|--|--|--|--|--|--|--|--|--|--|--|--|--|--|--|--|--|--|--|--|--|--|--|--|--|--|--|--|--|--|--|--|--|--|--|--|--|--|--|--|--|--|--|--|--|--|--|--|--|--|--|--|--|--|--|--|--|--|--|--|--|--|--|--|--|--|--|--|--|--|--|--|--|--|--|--|--|--|--|--|--|--|--|--|--|--|--|--|--|--|--|--|--|--|--|--|--|--|--|--|--|--|--|--|--|--|--|--|--|--|--|--|--|--|--|--|--|--|--|--|--|--|--|--|--|--|--|--|--|--|--|--|--|--|--|--|--|--|--|--|--|--|--|--|--|--|--|--|--|--|--|--|--|--|--|--|--|--|--|--|--|--|--|--|--|--|--|--|--|--|--|--|--|--|--|--|--|--|--|--|--|--|--|--|--|--|--|--|--|--|--|--|--|--|--|--|--|--|--|--|--|--|--|--|--|--|--|--|--|--|--|--|--|--|--|--|--|--|--|--|--|--|--|--|--|--|--|--|--|--|--|--|--|--|--|--|--|--|--|--|--|--|--|--|--|--|--|--|--|--|--|--|--|--|--|--|--|--|--|--|--|--|--|--|--|--|--|--|--|--|--|--|--|--|--|--|--|--|--|--|--|--|--|--|--|--|--|--|--|--|--|--|--|--|--|--|--|--|--|--|--|--|--|--|--|--|--|--|--|--|--|--|--|--|--|--|--|--|--|--|--|--|--|--|--|--|--|--|--|--|--|--|--|--|--|--|--|--|--|--|--|--|--|--|--|--|--|--|--|--|--|--|--|--|--|--|--|--|--|--|--|--|--|--|--|--|--|--|--|--|--|--|--|--|--|--|--|--|--|--|--|--|--|--|--|--|--|--|--|--|--|--|--|--|--|--|--|--|--|--|--|--|--|--|--|--|--|--|--|--|--|--|--|--|--|--|--|--|--|--|--|--|--|--|--|--|--|--|--|--|--|--|--|--|--|--|--|--|--|--|--|--|--|--|--|--|--|--|--|--|--|--|--|--|--|--|--|--|--|--|--|--|--|--|--|--|--|--|--|--|--|--|--|--|--|--|--|--|--|--|--|--|--|--|--|--|--|--|--|--|--|--|--|--|--|--|--|--|--|--|--|--|--|--|--|--|--|--|--|--|--|--|--|--|--|--|--|--|--|--|--|--|--|--|--|--|--|--|--|--|--|--|--|--|--|--|--|--|--|--|--|--|--|--|--|--|--|--|--|--|--|--|--|--|--|--|--|--|--|--|--|--|--|--|--|--|--|--|--|--|--|--|--|--|--|--|--|--|--|--|--|--|--|--|--|--|--|--|--|--|--|--|--|--|--|--|--|--|--|--|--|--|
