# Supplementary material for: Dendrochemical Challenge in Climate Science: Whether Chemical Elements in Wood Reflect the Fluctuations in Weather Parameters
Source: MDPI journal article supplement (doi:10.3390/plants11233240), 2022-11-25
Supplement: s1 [file s1]

Dendrochemical challenge in climate science: whether chemical elements in wood reflect the fluctuations in weather parameters  
Supplementary material

Table S1. A Spearman rho correlation matrix for Spruce #1.

| Weather par** | orgCa*                  | alcCa       | hclCa | orgSr | alcSr | hclSr | orgK  | alcK  | hclK  | orgAl        | alcAl | hclAl |
|---------------|-------------------------|-------------|-------|-------|-------|-------|-------|-------|-------|--------------|-------|-------|
| lv_jn_ind     | 0.08                    | -0.01       | -0.26 | 0.08  | 0.15  | 0.04  | -0.18 | -0.27 | 0.08  | 0.14         | 0.18  | -0.19 |
| lv_jl_ind     | -0.24                   | -0.26       | -0.38 | -0.06 | 0.17  | -0.15 | -0.34 | -0.34 | 0.02  | -0.21        | -0.19 | -0.29 |
| lv_au_ind     | <b>0.59<sup>†</sup></b> | <b>0.58</b> | 0.22  | -0.04 | 0.13  | 0.03  | 0.24  | -0.11 | 0.34  | 0.00         | 0.02  | -0.15 |
| lv-Vys_jn     | -0.05                   | -0.15       | -0.30 | 0.09  | 0.23  | 0.00  | -0.21 | -0.35 | -0.04 | 0.13         | 0.13  | -0.18 |
| lv-Vys_jl     | -0.24                   | -0.27       | -0.29 | 0.04  | 0.30  | -0.18 | -0.26 | -0.33 | 0.09  | -0.20        | -0.13 | -0.36 |
| lv-Vys_aug    | 0.52                    | 0.45        | 0.01  | -0.10 | 0.07  | -0.13 | 0.01  | -0.24 | 0.15  | -0.06        | -0.04 | -0.08 |
| Hum_may       | 0.30                    | 0.31        | -0.05 | 0.49  | 0.18  | 0.06  | -0.03 | -0.03 | 0.12  | -0.19        | -0.34 | -0.31 |
| Hum_jn        | -0.37                   | -0.38       | -0.31 | -0.38 | 0.05  | 0.06  | -0.35 | -0.34 | -0.54 | -0.09        | -0.08 | 0.45  |
| Hum_jl        | -0.41                   | -0.46       | -0.43 | 0.29  | 0.31  | 0.08  | -0.38 | -0.49 | -0.23 | <b>-0.57</b> | -0.48 | -0.19 |
| Hum_aug       | 0.35                    | 0.23        | -0.17 | 0.23  | 0.48  | -0.25 | -0.18 | -0.37 | 0.19  | -0.09        | 0.04  | -0.30 |
| T_may         | -0.53                   | -0.51       | -0.08 | -0.53 | -0.32 | 0.05  | -0.08 | -0.10 | -0.32 | -0.21        | 0.02  | 0.43  |
| T_jn          | -0.10                   | -0.17       | -0.42 | -0.13 | -0.07 | -0.09 | -0.36 | -0.41 | -0.20 | -0.41        | -0.19 | 0.18  |
| T_jl          | 0.53                    | 0.43        | 0.30  | 0.23  | -0.31 | 0.27  | 0.29  | 0.20  | -0.07 | 0.23         | -0.24 | -0.04 |
| T_aug         | -0.21                   | -0.02       | 0.33  | 0.05  | -0.23 | 0.05  | 0.40  | 0.37  | 0.34  | 0.05         | 0.16  | 0.13  |
| Prec_jn       | 0.06                    | -0.05       | -0.27 | 0.19  | 0.16  | 0.05  | -0.15 | -0.33 | 0.00  | 0.07         | 0.03  | -0.28 |
| Prec_jl       | -0.36                   | -0.41       | -0.33 | -0.23 | 0.06  | -0.34 | -0.32 | -0.23 | 0.04  | -0.04        | 0.10  | -0.16 |
| Prec_aug      | 0.53                    | 0.53        | 0.19  | 0.02  | -0.10 | 0.05  | 0.21  | -0.01 | 0.28  | -0.09        | -0.14 | -0.10 |
| Wind_my       | 0.21                    | 0.16        | 0.40  | -0.15 | -0.01 | 0.20  | 0.31  | 0.07  | -0.03 | 0.17         | 0.02  | 0.14  |
| Wind_jn       | -0.08                   | 0.02        | 0.36  | 0.01  | 0.23  | 0.21  | 0.31  | 0.17  | 0.09  | 0.27         | 0.12  | 0.06  |
| Wind_jl       | -0.47                   | -0.45       | 0.19  | 0.10  | 0.08  | -0.28 | 0.16  | 0.22  | 0.24  | 0.08         | 0.21  | -0.23 |
| Wind_aug      | -0.09                   | -0.02       | 0.49  | 0.19  | 0.01  | 0.15  | 0.36  | 0.44  | 0.02  | 0.22         | -0.11 | -0.07 |

\* org = original content of the element; alc = content of element after alcohol extraction; hcl = content of element after HCl treatment

\*\* lv\_jn\_ind, lv\_jl\_ind, lv\_au\_ind = Vysotskii-Ivanov humidity index detrended for June, July, and August, correspondingly; lv-Vys\_jn, lv-Vys\_jl, lv-Vys\_aug = Vysotskii-Ivanov humidity index in original form for June, July, and August, correspondingly; Hum\_may, Hum\_jn, Hum\_jl, Hum\_aug = mean humidity for May, June, July, and August, correspondingly; T\_may, T\_jn, T\_jl, T\_aug = mean temperature for May, June, July, and August, correspondingly; Prec\_jn, Prec\_jl, Prec\_aug = monthly sum of precipitations for June, July, and August, correspondingly; Wind\_my, Wind\_jn, Wind\_jl, Wind\_aug = mean wind speed for May, June, July, and August, correspondingly

<sup>†</sup> the values marked by bold red font are significant at  $p < 0.05$

Table S1. A Spearman rho correlation matrix for Spruce #1 (continued 1).

| Weather par | orgP        | alcP  | hclP  | orgS         | alcS        | hclS        | orgTi | alcTi | hclTi | orgMn | alcMn | hclMn       |
|-------------|-------------|-------|-------|--------------|-------------|-------------|-------|-------|-------|-------|-------|-------------|
| lv_jn_ind   | 0.06        | -0.08 | 0.16  | -0.14        | <b>0.63</b> | -0.01       | 0.23  | -0.18 | -0.34 | 0.12  | -0.05 | -0.18       |
| lv_jl_ind   | 0.08        | 0.23  | 0.07  | <b>-0.61</b> | -0.46       | 0.06        | 0.18  | -0.04 | -0.16 | -0.01 | 0.02  | 0.18        |
| lv_au_ind   | 0.34        | -0.11 | -0.10 | -0.13        | -0.11       | -0.41       | 0.12  | -0.07 | -0.08 | -0.19 | -0.35 | -0.40       |
| lv-Vys_jn   | 0.04        | -0.10 | 0.18  | -0.06        | <b>0.56</b> | -0.05       | 0.35  | -0.25 | -0.38 | 0.24  | 0.09  | -0.09       |
| lv-Vys_jl   | 0.09        | 0.22  | 0.03  | <b>-0.59</b> | -0.41       | 0.07        | 0.30  | -0.04 | -0.12 | -0.03 | 0.02  | 0.19        |
| lv-Vys_aug  | 0.20        | -0.11 | -0.13 | -0.25        | -0.19       | -0.47       | 0.02  | -0.09 | -0.25 | -0.08 | -0.27 | -0.31       |
| Hum_may     | -0.04       | -0.26 | -0.27 | 0.08         | -0.03       | -0.03       | -0.29 | 0.28  | -0.01 | -0.18 | -0.19 | 0.24        |
| Hum_jn      | -0.07       | -0.08 | 0.24  | -0.05        | -0.15       | -0.02       | 0.04  | -0.08 | -0.44 | 0.32  | 0.15  | -0.03       |
| Hum_jl      | -0.04       | -0.19 | -0.16 | -0.25        | -0.40       | 0.20        | 0.29  | -0.09 | -0.34 | 0.10  | 0.01  | <b>0.70</b> |
| Hum_aug     | 0.01        | -0.06 | -0.16 | -0.46        | 0.03        | -0.28       | 0.06  | 0.19  | -0.33 | -0.09 | -0.22 | -0.10       |
| T_may       | 0.19        | 0.03  | 0.04  | 0.02         | -0.29       | 0.14        | 0.18  | -0.36 | -0.22 | 0.08  | -0.09 | 0.01        |
| T_jn        | 0.02        | -0.15 | -0.28 | -0.13        | -0.30       | -0.37       | 0.01  | -0.18 | -0.38 | 0.18  | 0.01  | 0.38        |
| T_jl        | -0.06       | -0.44 | 0.13  | 0.42         | 0.38        | 0.10        | 0.08  | -0.40 | 0.04  | 0.08  | -0.03 | -0.20       |
| T_aug       | <b>0.68</b> | -0.21 | -0.51 | 0.47         | 0.03        | -0.10       | -0.05 | -0.21 | 0.31  | -0.40 | -0.39 | -0.07       |
| Prec_jn     | 0.04        | -0.18 | 0.13  | 0.03         | 0.58        | -0.03       | 0.35  | -0.30 | -0.37 | 0.20  | 0.03  | -0.02       |
| Prec_jl     | 0.08        | 0.38  | 0.08  | -0.68        | -0.32       | 0.07        | 0.21  | -0.12 | -0.11 | 0.00  | 0.07  | 0.01        |
| Prec_aug    | 0.36        | -0.23 | -0.25 | -0.02        | -0.20       | -0.34       | -0.03 | -0.16 | -0.03 | -0.25 | -0.41 | -0.24       |
| Wind_my     | 0.07        | -0.10 | 0.29  | -0.02        | -0.04       | 0.13        | 0.45  | -0.35 | 0.05  | 0.06  | -0.02 | -0.35       |
| Wind_jn     | 0.23        | -0.04 | 0.21  | 0.13         | 0.07        | 0.17        | 0.28  | -0.04 | 0.21  | -0.06 | 0.00  | -0.29       |
| Wind_jl     | 0.26        | 0.23  | -0.15 | -0.26        | -0.16       | 0.40        | 0.30  | -0.14 | 0.27  | -0.32 | -0.15 | 0.01        |
| Wind_aug    | -0.01       | 0.00  | 0.19  | 0.11         | -0.13       | <b>0.58</b> | 0.08  | 0.03  | 0.44  | -0.21 | -0.02 | -0.13       |

Table S1. A Spearman rho correlation matrix for Spruce #1 (continued 2).

| Weather par | orgFe | alcFe | hclFe       | orgCu | alcCu        | hclCu        | orgZn        | alcZn       | hclZn |
|-------------|-------|-------|-------------|-------|--------------|--------------|--------------|-------------|-------|
| lv_jn_ind   | -0.24 | 0.07  | -0.02       | -0.05 | 0.01         | 0.27         | 0.25         | 0.20        | -0.18 |
| lv_jl_ind   | -0.19 | -0.05 | -0.55       | 0.07  | 0.02         | 0.36         | 0.31         | 0.22        | -0.09 |
| lv_au_ind   | 0.12  | 0.31  | -0.22       | 0.38  | 0.31         | -0.12        | 0.25         | 0.54        | 0.04  |
| lv-Vys_jn   | -0.25 | 0.04  | 0.05        | -0.25 | -0.10        | 0.19         | 0.05         | 0.00        | -0.13 |
| lv-Vys_jl   | -0.13 | -0.01 | -0.49       | 0.09  | -0.01        | 0.47         | 0.35         | 0.27        | -0.03 |
| lv-Vys_aug  | -0.04 | 0.11  | -0.35       | 0.27  | 0.16         | -0.22        | 0.23         | 0.36        | -0.10 |
| Hum_may     | 0.16  | 0.18  | -0.19       | 0.14  | -0.07        | 0.26         | 0.31         | 0.02        | -0.35 |
| Hum_jn      | -0.45 | -0.23 | 0.18        | -0.23 | -0.13        | -0.32        | -0.41        | -0.32       | 0.01  |
| Hum_jl      | -0.19 | -0.23 | -0.25       | -0.41 | <b>-0.56</b> | 0.36         | -0.02        | -0.37       | -0.14 |
| Hum_aug     | -0.16 | 0.14  | -0.47       | 0.45  | 0.08         | 0.44         | <b>0.65</b>  | <b>0.55</b> | -0.35 |
| T_may       | -0.23 | -0.49 | 0.33        | -0.33 | -0.26        | <b>-0.59</b> | <b>-0.63</b> | -0.50       | 0.45  |
| T_jn        | -0.19 | -0.20 | -0.32       | -0.42 | -0.37        | -0.38        | -0.29        | -0.44       | -0.25 |
| T_jl        | 0.13  | -0.13 | 0.38        | -0.31 | -0.15        | -0.24        | -0.13        | -0.20       | 0.13  |
| T_aug       | 0.36  | 0.09  | <b>0.60</b> | -0.08 | 0.13         | <b>-0.74</b> | <b>-0.64</b> | -0.41       | 0.49  |
| Prec_jn     | -0.15 | 0.03  | 0.04        | -0.33 | -0.20        | 0.18         | 0.05         | -0.08       | -0.15 |
| Prec_jl     | -0.25 | -0.20 | -0.45       | 0.12  | 0.07         | 0.25         | 0.27         | 0.24        | 0.05  |
| Prec_aug    | 0.16  | 0.13  | -0.14       | 0.20  | 0.16         | -0.35        | 0.07         | 0.21        | 0.07  |
| Wind_my     | -0.04 | -0.10 | 0.28        | 0.02  | 0.07         | -0.03        | -0.05        | 0.27        | 0.46  |
| Wind_jn     | 0.06  | 0.24  | 0.44        | 0.17  | 0.31         | 0.09         | -0.12        | 0.26        | 0.40  |
| Wind_jl     | 0.09  | -0.27 | 0.20        | 0.19  | 0.00         | 0.23         | 0.10         | 0.08        | 0.53  |
| Wind_aug    | 0.18  | -0.09 | 0.44        | 0.23  | 0.14         | 0.28         | 0.08         | 0.15        | 0.48  |

Table S2. A Kendall tau correlation matrix for Spruce #1.

| Weather par** | orgCa*                  | alcCa       | hclCa | orgSr | alcSr | hclSr | orgK  | alcK  | hclK  | orgAl        | alcAl | hclAl |
|---------------|-------------------------|-------------|-------|-------|-------|-------|-------|-------|-------|--------------|-------|-------|
| lv_jn_ind     | 0.08                    | 0.05        | -0.21 | 0.03  | 0.13  | 0.03  | -0.15 | -0.18 | 0.08  | 0.15         | 0.13  | -0.13 |
| lv_jl_ind     | -0.18                   | -0.21       | -0.26 | -0.08 | 0.13  | -0.13 | -0.26 | -0.28 | 0.03  | -0.15        | -0.13 | -0.18 |
| lv_au_ind     | <b>0.49<sup>†</sup></b> | <b>0.46</b> | 0.15  | -0.13 | 0.13  | -0.03 | 0.21  | -0.08 | 0.23  | 0.00         | 0.03  | -0.08 |
| lv-Vys_jn     | -0.03                   | -0.05       | -0.26 | 0.08  | 0.13  | 0.08  | -0.21 | -0.23 | -0.03 | 0.10         | 0.13  | -0.08 |
| lv-Vys_jl     | -0.21                   | -0.23       | -0.23 | 0.00  | 0.21  | -0.15 | -0.23 | -0.26 | 0.05  | -0.18        | -0.10 | -0.26 |
| lv-Vys_aug    | 0.41                    | 0.33        | 0.03  | -0.10 | 0.00  | -0.10 | 0.08  | -0.10 | 0.10  | -0.08        | 0.00  | -0.05 |
| Hum_may       | 0.21                    | 0.18        | -0.03 | 0.36  | 0.15  | 0.10  | -0.03 | 0.00  | 0.10  | -0.13        | -0.31 | -0.26 |
| Hum_jn        | -0.23                   | -0.26       | -0.26 | -0.33 | 0.03  | 0.03  | -0.21 | -0.23 | -0.38 | -0.05        | -0.03 | 0.33  |
| Hum_jl        | -0.31                   | -0.33       | -0.33 | 0.21  | 0.21  | 0.05  | -0.23 | -0.36 | -0.15 | <b>-0.44</b> | -0.36 | -0.10 |
| Hum_aug       | 0.30                    | 0.17        | -0.12 | 0.19  | 0.37  | -0.17 | -0.12 | -0.22 | 0.17  | 0.01         | 0.06  | -0.25 |
| T_may         | -0.41                   | -0.38       | -0.03 | -0.36 | -0.26 | 0.05  | -0.03 | -0.10 | -0.21 | -0.18        | 0.00  | 0.31  |
| T_jn          | -0.10                   | -0.13       | -0.38 | -0.15 | -0.10 | -0.10 | -0.28 | -0.36 | -0.10 | -0.28        | -0.15 | 0.05  |
| T_jl          | 0.38                    | 0.31        | 0.21  | 0.13  | -0.18 | 0.18  | 0.21  | 0.18  | -0.03 | 0.26         | -0.08 | -0.03 |
| T_aug         | -0.10                   | 0.03        | 0.23  | 0.05  | -0.15 | 0.10  | 0.28  | 0.31  | 0.26  | 0.03         | 0.15  | 0.10  |
| Prec_jn       | 0.05                    | -0.03       | -0.18 | 0.10  | 0.10  | 0.05  | -0.13 | -0.21 | 0.00  | 0.03         | 0.05  | -0.15 |
| Prec_jl       | -0.26                   | -0.28       | -0.23 | -0.15 | 0.00  | -0.26 | -0.23 | -0.21 | 0.05  | -0.13        | 0.05  | -0.10 |
| Prec_aug      | 0.38                    | 0.36        | 0.15  | -0.03 | -0.08 | 0.03  | 0.21  | 0.03  | 0.23  | -0.10        | -0.08 | -0.08 |
| Wind_my       | 0.12                    | 0.09        | 0.27  | -0.09 | -0.01 | 0.12  | 0.22  | 0.01  | -0.01 | 0.19         | 0.04  | 0.09  |
| Wind_jn       | -0.01                   | 0.01        | 0.30  | 0.01  | 0.22  | 0.19  | 0.25  | 0.12  | 0.06  | 0.17         | 0.06  | 0.04  |
| Wind_jl       | -0.38                   | -0.38       | 0.20  | 0.04  | 0.04  | -0.22 | 0.09  | 0.17  | 0.20  | 0.07         | 0.20  | -0.17 |
| Wind_aug      | -0.09                   | -0.04       | 0.30  | 0.20  | 0.04  | 0.09  | 0.20  | 0.33  | 0.04  | 0.17         | -0.07 | -0.07 |

\* as in Table S1

\*\* as in Table S1

<sup>†</sup> as in Table S1

Table S2. A Kendall tau correlation matrix for Spruce #1 (continued 1).

| Weather par | orgP        | alcP  | hclP  | orgS         | alcS  | hclS        | orgTi | alcTi | hclTi | orgMn | alcMn | hclMn       |
|-------------|-------------|-------|-------|--------------|-------|-------------|-------|-------|-------|-------|-------|-------------|
| lv_jn_ind   | 0.00        | 0.00  | 0.13  | -0.08        | 0.41  | -0.03       | 0.15  | -0.13 | -0.23 | 0.10  | -0.05 | -0.13       |
| lv_jl_ind   | 0.00        | 0.15  | 0.03  | <b>-0.44</b> | -0.31 | 0.08        | 0.10  | 0.03  | -0.13 | 0.00  | 0.05  | 0.13        |
| lv_au_ind   | 0.21        | -0.05 | -0.13 | -0.08        | -0.05 | -0.18       | 0.10  | -0.03 | -0.08 | -0.15 | -0.26 | -0.28       |
| lv-Vys_jn   | 0.05        | -0.05 | 0.13  | -0.08        | 0.36  | -0.03       | 0.21  | -0.18 | -0.28 | 0.15  | 0.10  | -0.08       |
| lv-Vys_jl   | 0.03        | 0.18  | 0.00  | -0.41        | -0.28 | 0.05        | 0.23  | 0.00  | -0.10 | -0.03 | 0.03  | 0.10        |
| lv-Vys_aug  | 0.18        | -0.08 | -0.05 | -0.15        | -0.18 | -0.26       | 0.03  | -0.05 | -0.15 | -0.08 | -0.18 | -0.21       |
| Hum_may     | -0.03       | -0.23 | -0.15 | 0.10         | -0.03 | -0.05       | -0.23 | 0.21  | 0.00  | -0.13 | -0.13 | 0.15        |
| Hum_jn      | 0.00        | -0.05 | 0.08  | 0.03         | -0.10 | -0.03       | 0.05  | -0.08 | -0.33 | 0.15  | -0.05 | -0.03       |
| Hum_jl      | 0.03        | -0.13 | -0.15 | -0.15        | -0.33 | 0.15        | 0.13  | -0.05 | -0.21 | 0.03  | -0.03 | <b>0.46</b> |
| Hum_aug     | -0.01       | -0.19 | -0.06 | -0.35        | 0.01  | -0.17       | 0.09  | 0.12  | -0.14 | -0.04 | -0.14 | -0.09       |
| T_may       | 0.13        | 0.03  | 0.00  | 0.00         | -0.23 | 0.10        | 0.08  | -0.21 | -0.21 | 0.03  | -0.08 | -0.05       |
| T_jn        | -0.03       | -0.13 | -0.15 | -0.05        | -0.23 | -0.31       | 0.03  | -0.05 | -0.36 | 0.13  | 0.03  | 0.26        |
| T_jl        | -0.05       | -0.31 | 0.08  | 0.28         | 0.26  | 0.08        | 0.05  | -0.28 | 0.03  | 0.05  | -0.05 | -0.08       |
| T_aug       | <b>0.49</b> | -0.13 | -0.41 | 0.31         | 0.03  | -0.05       | -0.03 | -0.15 | 0.26  | -0.28 | -0.23 | -0.05       |
| Prec_jn     | 0.03        | -0.08 | 0.10  | 0.00         | 0.33  | 0.00        | 0.28  | -0.21 | -0.26 | 0.13  | 0.08  | 0.00        |
| Prec_jl     | 0.03        | 0.28  | 0.05  | <b>-0.46</b> | -0.23 | 0.05        | 0.13  | -0.05 | -0.10 | -0.03 | 0.03  | 0.00        |
| Prec_aug    | 0.26        | -0.21 | -0.18 | -0.03        | -0.15 | -0.18       | -0.05 | -0.08 | -0.03 | -0.21 | -0.31 | -0.13       |
| Wind_my     | 0.01        | -0.06 | 0.22  | 0.04         | -0.06 | 0.06        | 0.22  | -0.17 | -0.01 | 0.04  | -0.01 | -0.27       |
| Wind_jn     | 0.19        | -0.06 | 0.14  | 0.09         | 0.09  | 0.12        | 0.17  | -0.04 | 0.17  | -0.09 | 0.01  | -0.19       |
| Wind_jl     | 0.17        | 0.17  | -0.12 | -0.20        | -0.09 | 0.33        | 0.25  | -0.12 | 0.17  | -0.22 | -0.14 | 0.01        |
| Wind_aug    | -0.01       | 0.01  | 0.09  | 0.07         | -0.07 | <b>0.43</b> | 0.04  | -0.01 | 0.27  | -0.14 | 0.01  | -0.12       |

Table S2. A Kendall tau correlation matrix for Spruce #1 (continued 2).

| Weather par | orgFe | alcFe | hclFe       | orgCu | alcCu | hclCu        | orgZn        | alcZn | hclZn |
|-------------|-------|-------|-------------|-------|-------|--------------|--------------|-------|-------|
| lv_jn_ind   | -0.21 | 0.08  | -0.05       | -0.03 | -0.05 | 0.21         | 0.21         | 0.13  | -0.10 |
| lv_jl_ind   | -0.10 | -0.03 | -0.31       | 0.03  | 0.00  | 0.26         | 0.26         | 0.13  | -0.05 |
| lv_au_ind   | 0.10  | 0.23  | -0.15       | 0.28  | 0.26  | -0.05        | 0.10         | 0.38  | 0.05  |
| lv-Vys_jn   | -0.26 | -0.03 | 0.00        | -0.13 | -0.05 | 0.10         | 0.05         | -0.03 | -0.10 |
| lv-Vys_jl   | -0.13 | 0.05  | -0.28       | 0.05  | -0.03 | 0.33         | 0.28         | 0.15  | -0.03 |
| lv-Vys_aug  | -0.03 | 0.10  | -0.23       | 0.21  | 0.18  | -0.13        | 0.08         | 0.26  | -0.08 |
| Hum_may     | 0.08  | 0.10  | -0.13       | 0.10  | -0.03 | 0.18         | 0.23         | 0.00  | -0.28 |
| Hum_jn      | -0.36 | -0.18 | 0.10        | -0.13 | -0.10 | -0.21        | -0.26        | -0.23 | 0.00  |
| Hum_jl      | -0.03 | -0.21 | -0.23       | -0.31 | -0.38 | 0.33         | -0.03        | -0.15 | -0.08 |
| Hum_aug     | -0.12 | 0.12  | -0.37       | 0.32  | 0.04  | 0.27         | <b>0.48</b>  | 0.40  | -0.27 |
| T_may       | -0.13 | -0.31 | 0.23        | -0.21 | -0.23 | -0.38        | <b>-0.44</b> | -0.31 | 0.28  |
| T_jn        | -0.08 | -0.10 | -0.28       | -0.31 | -0.23 | -0.28        | -0.18        | -0.31 | -0.23 |
| T_jl        | 0.10  | -0.13 | 0.26        | -0.23 | -0.05 | -0.15        | -0.10        | -0.13 | 0.10  |
| T_aug       | 0.18  | 0.05  | <b>0.49</b> | -0.05 | 0.08  | <b>-0.59</b> | <b>-0.49</b> | -0.31 | 0.33  |
| Prec_jn     | -0.18 | 0.00  | 0.03        | -0.21 | -0.13 | 0.13         | 0.03         | -0.10 | -0.13 |
| Prec_jl     | -0.13 | -0.10 | -0.23       | 0.10  | 0.03  | 0.13         | 0.18         | 0.15  | 0.08  |
| Prec_aug    | 0.10  | 0.08  | -0.10       | 0.18  | 0.15  | -0.21        | 0.00         | 0.18  | 0.05  |
| Wind_my     | 0.01  | -0.06 | 0.12        | -0.01 | 0.12  | 0.04         | -0.01        | 0.27  | 0.32  |
| Wind_jn     | 0.09  | 0.14  | 0.40        | 0.17  | 0.22  | 0.09         | -0.12        | 0.22  | 0.35  |
| Wind_jl     | 0.09  | -0.22 | 0.20        | 0.14  | 0.04  | 0.17         | 0.04         | -0.01 | 0.41  |
| Wind_aug    | 0.07  | -0.09 | 0.30        | 0.14  | 0.12  | 0.17         | 0.07         | 0.12  | 0.38  |

Table S3. A Spearman rho correlation matrix for Spruce #2.

| Weather par** | orgCa*                   | alcCa        | hclCa | orgSr | alcSr | hclSr | orgK         | alcK         | hclK         | orgAl        | alcAl | hclAl        |
|---------------|--------------------------|--------------|-------|-------|-------|-------|--------------|--------------|--------------|--------------|-------|--------------|
| lv_jn_ind     | -0.14                    | -0.29        | 0.50  | 0.26  | -0.33 | -0.21 | -0.31        | <b>-0.88</b> | 0.07         | <b>-0.71</b> | 0.05  | 0.33         |
| lv_jl_ind     | -0.17                    | -0.36        | 0.43  | 0.00  | -0.33 | 0.05  | -0.43        | -0.36        | -0.19        | 0.29         | 0.17  | -0.19        |
| lv_au_ind     | 0.07                     | 0.02         | -0.05 | 0.55  | 0.33  | 0.12  | <b>-0.88</b> | -0.21        | 0.26         | -0.45        | -0.02 | <b>0.79</b>  |
| lv-Vys_jn     | 0.05                     | -0.12        | 0.57  | 0.36  | -0.21 | -0.10 | -0.12        | -0.69        | 0.19         | -0.50        | 0.10  | 0.12         |
| lv-Vys_jl     | -0.17                    | -0.36        | 0.43  | 0.00  | -0.33 | 0.05  | -0.43        | -0.36        | -0.19        | 0.29         | 0.17  | -0.19        |
| lv-Vys_aug    | 0.14                     | 0.12         | -0.07 | 0.55  | 0.33  | 0.14  | <b>-0.79</b> | -0.07        | 0.29         | -0.31        | -0.07 | <b>0.79</b>  |
| Hum_may       | 0.19                     | 0.12         | -0.05 | 0.33  | 0.12  | 0.43  | -0.14        | -0.10        | 0.33         | -0.48        | -0.69 | -0.29        |
| Hum_jn        | -0.07                    | -0.17        | 0.29  | 0.19  | -0.29 | -0.33 | -0.05        | -0.17        | -0.10        | 0.19         | 0.02  | 0.10         |
| Hum_jl        | 0.10                     | -0.14        | 0.60  | 0.24  | -0.26 | 0.36  | -0.38        | -0.45        | 0.12         | 0.05         | -0.05 | -0.29        |
| Hum_aug       | -0.16                    | -0.23        | -0.08 | 0.30  | -0.04 | 0.16  | <b>-0.75</b> | -0.47        | 0.11         | <b>-0.73</b> | -0.55 | 0.32         |
| T_may         | -0.26                    | -0.31        | 0.17  | -0.05 | -0.38 | -0.48 | -0.14        | -0.10        | -0.33        | 0.40         | 0.17  | 0.21         |
| T_jn          | 0.60                     | 0.60         | 0.36  | 0.31  | 0.24  | 0.55  | -0.02        | 0.14         | 0.50         | 0.19         | 0.26  | 0.38         |
| T_jl          | 0.07                     | 0.19         | -0.36 | 0.21  | 0.36  | -0.14 | 0.02         | 0.12         | 0.19         | -0.48        | -0.12 | 0.43         |
| T_aug         | -0.10                    | -0.17        | 0.24  | 0.07  | -0.40 | -0.29 | 0.17         | -0.21        | -0.10        | 0.02         | -0.24 | -0.12        |
| Prec_jn       | 0.21                     | 0.05         | 0.57  | 0.52  | -0.10 | 0.07  | -0.19        | -0.60        | 0.36         | -0.50        | 0.00  | 0.21         |
| Prec_jl       | -0.31                    | -0.38        | 0.17  | -0.31 | -0.31 | -0.14 | -0.21        | -0.17        | -0.38        | 0.38         | 0.31  | -0.14        |
| Prec_aug      | 0.14                     | 0.12         | -0.07 | 0.55  | 0.33  | 0.14  | <b>-0.79</b> | -0.07        | 0.29         | -0.31        | -0.07 | <b>0.79</b>  |
| Wind_my       | -0.14                    | -0.12        | -0.21 | 0.19  | 0.31  | -0.24 | -0.52        | -0.02        | -0.05        | -0.17        | 0.31  | 0.60         |
| Wind_jn       | -0.25                    | -0.35        | 0.11  | 0.01  | -0.10 | -0.36 | 0.01         | -0.28        | -0.19        | -0.12        | 0.17  | -0.24        |
| Wind_jl       | <b>-0.75<sup>†</sup></b> | <b>-0.81</b> | -0.22 | -0.55 | -0.62 | -0.55 | 0.07         | -0.19        | <b>-0.74</b> | 0.16         | -0.40 | <b>-0.75</b> |
| Wind_aug      | -0.57                    | -0.52        | -0.55 | -0.43 | -0.17 | -0.55 | 0.19         | 0.26         | -0.60        | 0.24         | -0.29 | -0.57        |

\* as in Table S1

\*\* as in Table S1

<sup>†</sup> as in Table S1

Table S3. A Spearman rho correlation matrix for Spruce #2 (continued 1).

| Weather par | orgP         | alcP        | hclP  | orgS         | alcS         | hclS  | orgTi        | alcTi | hclTi       | orgMn        | alcMn        | hclMn       |
|-------------|--------------|-------------|-------|--------------|--------------|-------|--------------|-------|-------------|--------------|--------------|-------------|
| lv_jn_ind   | -0.52        | 0.33        | 0.38  | <b>-0.74</b> | -0.36        | 0.22  | -0.48        | -0.36 | 0.50        | -0.29        | -0.29        | -0.31       |
| lv_jl_ind   | 0.45         | -0.31       | -0.38 | -0.43        | 0.36         | -0.14 | <b>-0.76</b> | 0.17  | <b>0.74</b> | <b>-0.71</b> | -0.55        | -0.10       |
| lv_au_ind   | -0.31        | 0.26        | -0.14 | -0.40        | -0.14        | 0.33  | -0.14        | 0.50  | -0.05       | 0.19         | 0.29         | -0.17       |
| lv-Vys_jn   | -0.43        | 0.29        | 0.21  | -0.69        | -0.45        | 0.14  | -0.26        | -0.40 | 0.45        | -0.12        | -0.19        | -0.10       |
| lv-Vys_jl   | 0.45         | -0.31       | -0.38 | -0.43        | 0.36         | -0.14 | <b>-0.76</b> | 0.17  | <b>0.74</b> | <b>-0.71</b> | -0.55        | -0.10       |
| lv-Vys_aug  | -0.29        | 0.17        | -0.19 | -0.29        | -0.24        | 0.25  | 0.05         | 0.67  | -0.14       | 0.29         | 0.33         | -0.02       |
| Hum_may     | <b>-0.71</b> | -0.64       | -0.33 | 0.05         | <b>-0.79</b> | -0.65 | 0.17         | 0.10  | 0.05        | -0.10        | -0.07        | 0.19        |
| Hum_jn      | 0.07         | 0.21        | 0.14  | -0.38        | -0.26        | -0.03 | 0.14         | 0.31  | 0.12        | 0.10         | -0.17        | -0.05       |
| Hum_jl      | 0.05         | -0.62       | -0.57 | -0.45        | -0.14        | -0.38 | -0.64        | 0.10  | <b>0.83</b> | <b>-0.71</b> | -0.52        | 0.19        |
| Hum_aug     | -0.66        | -0.34       | -0.11 | -0.26        | -0.42        | -0.27 | -0.35        | 0.36  | 0.20        | -0.35        | -0.19        | -0.26       |
| T_may       | 0.40         | 0.26        | 0.19  | -0.29        | 0.17         | 0.11  | -0.05        | 0.48  | 0.12        | -0.05        | -0.24        | -0.19       |
| T_jn        | -0.02        | -0.31       | -0.48 | 0.07         | -0.24        | 0.14  | 0.14         | 0.29  | 0.10        | 0.14         | 0.31         | <b>0.74</b> |
| T_jl        | -0.50        | 0.55        | 0.40  | 0.07         | -0.33        | 0.30  | 0.55         | -0.07 | -0.62       | 0.69         | 0.52         | -0.14       |
| T_aug       | -0.19        | -0.05       | 0.21  | -0.21        | -0.50        | -0.30 | 0.21         | 0.17  | 0.12        | -0.02        | -0.29        | 0.00        |
| Prec_jn     | -0.55        | 0.14        | 0.05  | -0.64        | -0.67        | 0.05  | -0.10        | -0.19 | 0.38        | 0.00         | -0.07        | 0.10        |
| Prec_jl     | 0.64         | -0.07       | -0.12 | -0.17        | <b>0.71</b>  | 0.08  | -0.69        | 0.02  | 0.48        | -0.60        | -0.43        | -0.24       |
| Prec_aug    | -0.29        | 0.17        | -0.19 | -0.29        | -0.24        | 0.25  | 0.05         | 0.67  | -0.14       | 0.29         | 0.33         | -0.02       |
| Wind_my     | 0.14         | <b>0.74</b> | 0.19  | -0.29        | 0.40         | 0.63  | -0.12        | 0.12  | -0.24       | 0.33         | 0.33         | -0.43       |
| Wind_jn     | 0.11         | 0.53        | 0.30  | -0.42        | 0.18         | 0.18  | -0.22        | -0.49 | 0.14        | -0.01        | -0.16        | -0.46       |
| Wind_jl     | 0.30         | -0.20       | 0.28  | -0.01        | 0.35         | -0.55 | -0.41        | -0.08 | 0.26        | -0.66        | <b>-0.78</b> | -0.68       |
| Wind_aug    | 0.33         | 0.19        | 0.33  | 0.21         | 0.38         | -0.27 | 0.12         | -0.05 | -0.31       | 0.00         | -0.24        | -0.62       |

Table S3. A Spearman rho correlation matrix for Spruce #2 (continued 2).

| Weather par | orgFe        | alcFe | hclFe | orgCu | alcCu        | hclCu | orgZn        | alcZn        | hclZn        |
|-------------|--------------|-------|-------|-------|--------------|-------|--------------|--------------|--------------|
| lv_jn_ind   | 0.14         | 0.24  | -0.02 | 0.05  | -0.38        | -0.52 | -0.36        | 0.07         | -0.40        |
| lv_jl_ind   | 0.05         | -0.14 | 0.60  | 0.50  | <b>-0.81</b> | 0.05  | -0.31        | 0.14         | -0.19        |
| lv_au_ind   | -0.50        | -0.14 | 0.60  | 0.31  | -0.05        | -0.52 | <b>-0.88</b> | 0.26         | -0.69        |
| lv-Vys_jn   | 0.14         | 0.38  | -0.10 | -0.24 | -0.21        | -0.60 | -0.17        | 0.10         | -0.29        |
| lv-Vys_jl   | 0.05         | -0.14 | 0.60  | 0.50  | <b>-0.81</b> | 0.05  | -0.31        | 0.14         | -0.19        |
| lv-Vys_aug  | -0.50        | -0.12 | 0.57  | 0.19  | 0.07         | -0.43 | <b>-0.86</b> | 0.36         | -0.55        |
| Hum_may     | 0.50         | 0.48  | 0.36  | -0.52 | 0.33         | -0.43 | -0.14        | 0.52         | 0.38         |
| Hum_jn      | -0.38        | -0.10 | -0.07 | -0.07 | -0.05        | -0.19 | -0.26        | 0.00         | -0.05        |
| Hum_jl      | 0.45         | 0.31  | 0.69  | 0.05  | -0.64        | -0.19 | -0.29        | 0.52         | 0.00         |
| Hum_aug     | 0.14         | 0.04  | 0.66  | 0.23  | -0.14        | -0.40 | <b>-0.74</b> | 0.43         | -0.17        |
| T_may       | -0.55        | -0.43 | 0.00  | 0.36  | -0.29        | 0.14  | -0.33        | -0.14        | -0.14        |
| T_jn        | 0.33         | 0.48  | 0.29  | -0.36 | 0.00         | 0.10  | -0.10        | 0.69         | -0.02        |
| T_jl        | -0.36        | 0.00  | -0.38 | -0.26 | 0.64         | -0.36 | -0.07        | -0.19        | -0.19        |
| T_aug       | 0.00         | 0.10  | -0.19 | -0.29 | 0.07         | -0.12 | -0.07        | 0.10         | 0.29         |
| Prec_jn     | 0.17         | 0.50  | 0.05  | -0.40 | -0.07        | -0.67 | -0.29        | 0.33         | -0.24        |
| Prec_jl     | -0.07        | -0.38 | 0.29  | 0.69  | <b>-0.74</b> | 0.36  | -0.07        | -0.19        | -0.19        |
| Prec_aug    | -0.50        | -0.12 | 0.57  | 0.19  | 0.07         | -0.43 | <b>-0.86</b> | 0.36         | -0.55        |
| Wind_my     | <b>-0.81</b> | -0.48 | 0.10  | 0.52  | -0.05        | -0.29 | -0.45        | -0.38        | <b>-0.76</b> |
| Wind_jn     | -0.34        | -0.17 | -0.28 | 0.13  | -0.13        | -0.37 | 0.11         | -0.55        | -0.29        |
| Wind_jl     | -0.06        | -0.54 | -0.06 | 0.51  | -0.36        | 0.25  | 0.13         | -0.54        | 0.37         |
| Wind_aug    | -0.50        | -0.64 | -0.31 | 0.33  | 0.17         | 0.14  | 0.24         | <b>-0.76</b> | 0.24         |

Table S4. A Kendall tau correlation matrix for Spruce #2.

| Weather par** | orgCa* | alcCa                    | hclCa | orgSr | alcSr | hclSr | orgK         | alcK         | hclK  | orgAl        | alcAl | hclAl       |
|---------------|--------|--------------------------|-------|-------|-------|-------|--------------|--------------|-------|--------------|-------|-------------|
| lv_jn_ind     | -0.07  | -0.21                    | 0.36  | 0.21  | -0.29 | -0.14 | -0.14        | <b>-0.71</b> | 0.07  | <b>-0.57</b> | 0.07  | 0.21        |
| lv_jl_ind     | -0.14  | -0.29                    | 0.43  | 0.14  | -0.21 | 0.07  | -0.36        | -0.21        | -0.14 | 0.21         | 0.14  | -0.14       |
| lv_au_ind     | 0.07   | 0.07                     | -0.07 | 0.36  | 0.29  | 0.14  | <b>-0.71</b> | 0.00         | 0.21  | -0.29        | -0.07 | <b>0.64</b> |
| lv-Vys_jn     | 0.00   | -0.14                    | 0.43  | 0.29  | -0.21 | -0.07 | 0.07         | -0.50        | 0.14  | -0.36        | 0.00  | 0.14        |
| lv-Vys_jl     | -0.14  | -0.29                    | 0.43  | 0.14  | -0.21 | 0.07  | -0.36        | -0.21        | -0.14 | 0.21         | 0.14  | -0.14       |
| lv-Vys_aug    | 0.21   | 0.21                     | -0.07 | 0.36  | 0.29  | 0.14  | <b>-0.57</b> | 0.00         | 0.21  | -0.29        | -0.07 | <b>0.64</b> |
| Hum_may       | 0.07   | 0.07                     | -0.07 | 0.21  | 0.00  | 0.29  | -0.14        | -0.14        | 0.21  | -0.29        | -0.50 | -0.21       |
| Hum_jn        | -0.07  | -0.07                    | 0.21  | 0.07  | -0.29 | -0.29 | 0.00         | -0.14        | -0.07 | 0.14         | 0.07  | 0.07        |
| Hum_jl        | 0.07   | -0.07                    | 0.50  | 0.21  | -0.14 | 0.29  | -0.29        | -0.29        | 0.07  | 0.00         | -0.07 | -0.21       |
| Hum_aug       | -0.11  | -0.18                    | -0.11 | 0.18  | -0.11 | 0.11  | -0.55        | -0.40        | 0.04  | <b>-0.62</b> | -0.47 | 0.25        |
| T_may         | -0.21  | -0.21                    | 0.07  | -0.07 | -0.43 | -0.43 | -0.14        | -0.14        | -0.21 | 0.43         | 0.07  | 0.21        |
| T_jn          | 0.43   | 0.43                     | 0.29  | 0.14  | 0.07  | 0.36  | -0.07        | 0.07         | 0.29  | 0.21         | 0.14  | 0.29        |
| T_jl          | 0.00   | 0.14                     | -0.29 | 0.00  | 0.21  | -0.21 | 0.07         | 0.07         | 0.00  | -0.36        | -0.14 | 0.29        |
| T_aug         | -0.07  | -0.07                    | 0.21  | 0.07  | -0.29 | -0.29 | 0.14         | -0.14        | -0.07 | 0.00         | -0.07 | -0.07       |
| Prec_jn       | 0.14   | 0.00                     | 0.43  | 0.43  | -0.07 | 0.07  | -0.07        | -0.36        | 0.29  | -0.36        | 0.00  | 0.29        |
| Prec_jl       | -0.29  | -0.29                    | 0.14  | -0.14 | -0.21 | -0.07 | -0.21        | -0.07        | -0.29 | 0.21         | 0.43  | -0.14       |
| Prec_aug      | 0.21   | 0.21                     | -0.07 | 0.36  | 0.29  | 0.14  | <b>-0.57</b> | 0.00         | 0.21  | -0.29        | -0.07 | <b>0.64</b> |
| Wind_my       | -0.14  | -0.14                    | -0.14 | 0.14  | 0.21  | -0.21 | -0.36        | -0.07        | -0.14 | -0.07        | 0.14  | 0.43        |
| Wind_jn       | -0.11  | -0.25                    | 0.04  | 0.04  | -0.04 | -0.18 | -0.04        | -0.18        | 0.04  | -0.04        | 0.04  | -0.11       |
| Wind_jl       | -0.55  | <b>-0.69<sup>†</sup></b> | -0.18 | -0.40 | -0.47 | -0.33 | 0.04         | -0.04        | -0.55 | 0.18         | -0.33 | -0.55       |
| Wind_aug      | -0.43  | -0.29                    | -0.43 | -0.29 | -0.07 | -0.36 | 0.21         | 0.21         | -0.43 | 0.07         | -0.14 | -0.43       |

\* as in Table S1

\*\* as in Table S1

<sup>†</sup> as in Table S1

Table S4. A Kendall tau correlation matrix for Spruce #2 (continued 1).

| Weather par | orgP         | alcP        | hclP  | orgS  | alcS         | hclS  | orgTi        | alcTi | hclTi       | orgMn        | alcMn        | hclMn       |
|-------------|--------------|-------------|-------|-------|--------------|-------|--------------|-------|-------------|--------------|--------------|-------------|
| lv_jn_ind   | -0.43        | 0.29        | 0.29  | -0.50 | -0.07        | 0.18  | -0.36        | -0.21 | 0.36        | -0.21        | -0.21        | -0.14       |
| lv_jl_ind   | 0.36         | -0.21       | -0.21 | -0.29 | 0.29         | -0.09 | <b>-0.57</b> | 0.14  | <b>0.57</b> | <b>-0.57</b> | -0.43        | -0.07       |
| lv_au_ind   | -0.14        | 0.14        | -0.14 | -0.36 | -0.21        | 0.27  | -0.07        | 0.36  | -0.07       | 0.21         | 0.21         | -0.14       |
| lv-Vys_jn   | -0.21        | 0.21        | 0.21  | -0.43 | -0.29        | 0.09  | -0.14        | -0.29 | 0.29        | -0.14        | -0.29        | -0.07       |
| lv-Vys_jl   | 0.36         | -0.21       | -0.21 | -0.29 | 0.29         | -0.09 | <b>-0.57</b> | 0.14  | <b>0.57</b> | <b>-0.57</b> | -0.43        | -0.07       |
| lv-Vys_aug  | -0.14        | 0.14        | -0.29 | -0.21 | -0.21        | 0.18  | 0.07         | 0.50  | -0.07       | 0.21         | 0.21         | 0.00        |
| Hum_may     | <b>-0.57</b> | -0.43       | -0.29 | 0.07  | <b>-0.64</b> | -0.53 | 0.07         | 0.07  | 0.07        | -0.07        | -0.07        | 0.14        |
| Hum_jn      | 0.00         | 0.14        | 0.14  | -0.36 | -0.21        | 0.00  | 0.07         | 0.21  | 0.07        | 0.07         | -0.07        | 0.00        |
| Hum_jl      | 0.00         | -0.43       | -0.43 | -0.36 | -0.07        | -0.36 | -0.50        | 0.07  | <b>0.64</b> | -0.50        | -0.36        | 0.14        |
| Hum_aug     | -0.55        | -0.25       | -0.11 | -0.18 | -0.33        | -0.23 | -0.33        | 0.33  | 0.18        | -0.33        | -0.18        | -0.18       |
| T_may       | 0.29         | 0.14        | 0.14  | -0.21 | 0.07         | 0.00  | -0.07        | 0.36  | 0.07        | -0.07        | -0.21        | -0.14       |
| T_jn        | -0.07        | -0.21       | -0.36 | 0.00  | -0.14        | 0.09  | -0.14        | 0.29  | 0.14        | 0.14         | 0.29         | <b>0.64</b> |
| T_jl        | -0.36        | 0.36        | 0.36  | 0.00  | -0.29        | 0.27  | 0.29         | 0.00  | -0.43       | <b>0.57</b>  | 0.43         | -0.07       |
| T_aug       | 0.00         | 0.00        | 0.14  | -0.21 | -0.36        | -0.27 | 0.21         | 0.07  | 0.07        | -0.07        | -0.21        | 0.00        |
| Prec_jn     | -0.21        | 0.07        | 0.07  | -0.43 | -0.43        | 0.00  | 0.00         | -0.14 | 0.29        | 0.00         | -0.14        | 0.07        |
| Prec_jl     | 0.50         | -0.07       | -0.07 | -0.14 | <b>0.57</b>  | 0.09  | -0.43        | 0.00  | 0.29        | -0.43        | -0.29        | -0.21       |
| Prec_aug    | -0.14        | 0.14        | -0.29 | -0.21 | -0.21        | 0.18  | 0.07         | 0.50  | -0.07       | 0.21         | 0.21         | 0.00        |
| Wind_my     | 0.07         | <b>0.64</b> | 0.07  | -0.14 | 0.29         | 0.45  | -0.14        | 0.00  | -0.14       | 0.14         | 0.14         | -0.36       |
| Wind_jn     | 0.11         | 0.40        | 0.18  | -0.33 | 0.11         | 0.14  | -0.11        | -0.33 | 0.11        | 0.04         | -0.11        | -0.33       |
| Wind_jl     | 0.33         | -0.18       | 0.18  | 0.04  | 0.25         | -0.45 | -0.25        | -0.11 | 0.11        | -0.55        | <b>-0.69</b> | -0.55       |
| Wind_aug    | 0.21         | 0.21        | 0.21  | 0.14  | 0.29         | -0.18 | 0.14         | 0.00  | -0.14       | 0.00         | -0.14        | -0.36       |

Table S4. A Kendall tau correlation matrix for Spruce #2 (continued 2).

| Weather par | orgFe        | alcFe        | hclFe       | orgCu       | alcCu        | hclCu | orgZn        | alcZn        | hclZn        |
|-------------|--------------|--------------|-------------|-------------|--------------|-------|--------------|--------------|--------------|
| lv_jn_ind   | 0.14         | 0.21         | 0.00        | 0.07        | -0.21        | -0.29 | -0.29        | 0.07         | -0.21        |
| lv_jl_ind   | 0.07         | -0.14        | 0.50        | 0.43        | <b>-0.57</b> | -0.07 | -0.21        | 0.14         | -0.14        |
| lv_au_ind   | -0.43        | -0.07        | 0.43        | 0.21        | -0.07        | -0.43 | <b>-0.71</b> | 0.21         | -0.50        |
| lv-Vys_jn   | 0.07         | 0.29         | -0.07       | -0.14       | 0.00         | -0.36 | -0.07        | 0.14         | -0.14        |
| lv-Vys_jl   | 0.07         | -0.14        | 0.50        | 0.43        | <b>-0.57</b> | -0.07 | -0.21        | 0.14         | -0.14        |
| lv-Vys_aug  | -0.43        | -0.07        | 0.43        | 0.07        | 0.07         | -0.29 | <b>-0.71</b> | 0.21         | -0.36        |
| Hum_may     | 0.43         | 0.21         | 0.29        | -0.36       | 0.21         | -0.29 | -0.14        | 0.36         | 0.21         |
| Hum_jn      | -0.29        | -0.07        | -0.14       | -0.07       | -0.07        | -0.14 | -0.14        | -0.07        | -0.07        |
| Hum_jl      | 0.29         | 0.21         | <b>0.57</b> | 0.07        | -0.50        | -0.14 | -0.29        | 0.36         | 0.07         |
| Hum_aug     | 0.11         | 0.04         | 0.55        | 0.11        | -0.18        | -0.25 | -0.55        | 0.33         | -0.11        |
| T_may       | -0.43        | -0.36        | 0.00        | 0.21        | -0.21        | 0.14  | -0.29        | -0.21        | -0.21        |
| T_jn        | 0.36         | 0.29         | 0.21        | -0.29       | -0.14        | 0.07  | -0.07        | 0.43         | 0.00         |
| T_jl        | -0.21        | 0.00         | -0.36       | -0.29       | 0.43         | -0.21 | 0.07         | -0.14        | -0.14        |
| T_aug       | 0.00         | 0.07         | -0.14       | -0.21       | 0.07         | -0.14 | 0.00         | 0.07         | 0.21         |
| Prec_jn     | 0.07         | 0.43         | 0.07        | -0.29       | 0.00         | -0.50 | -0.21        | 0.29         | -0.14        |
| Prec_jl     | -0.07        | -0.29        | 0.21        | <b>0.57</b> | <b>-0.57</b> | 0.21  | -0.07        | -0.14        | -0.14        |
| Prec_aug    | -0.43        | -0.07        | 0.43        | 0.07        | 0.07         | -0.29 | <b>-0.71</b> | 0.21         | -0.36        |
| Wind_my     | <b>-0.64</b> | -0.43        | 0.07        | 0.43        | 0.00         | -0.21 | -0.36        | -0.29        | <b>-0.57</b> |
| Wind_jn     | -0.25        | -0.11        | -0.11       | 0.11        | -0.11        | -0.25 | -0.04        | -0.40        | -0.18        |
| Wind_jl     | -0.11        | -0.33        | -0.04       | 0.40        | -0.25        | 0.18  | 0.04         | -0.33        | 0.40         |
| Wind_aug    | -0.36        | <b>-0.57</b> | -0.21       | 0.29        | 0.14         | 0.07  | 0.21         | <b>-0.57</b> | 0.14         |

Table S5. A Spearman rho correlation matrix for Spruce #3.

| Weather par        | orgCa* | alcCa | hclCa                    | orgSr | alcSr | hclSr | orgK         | alcK         | hclK        | orgAl | alcAl        | hclAl       |
|--------------------|--------|-------|--------------------------|-------|-------|-------|--------------|--------------|-------------|-------|--------------|-------------|
| <b>lv_jn_ind**</b> | 0.20   | 0.18  | -0.36                    | 0.02  | -0.14 | 0.19  | -0.16        | -0.19        | 0.08        | -0.07 | 0.20         | -0.36       |
| <b>lv_jl_ind</b>   | 0.07   | -0.08 | -0.13                    | -0.45 | -0.21 | -0.12 | -0.59        | -0.38        | 0.06        | 0.01  | 0.49         | 0.52        |
| <b>lv_au_ind</b>   | -0.38  | -0.34 | -0.31                    | -0.27 | -0.26 | -0.42 | -0.02        | 0.27         | -0.01       | -0.15 | -0.25        | -0.12       |
| <b>lv-Vys_jn</b>   | 0.26   | 0.28  | -0.23                    | -0.04 | -0.09 | 0.31  | -0.06        | -0.19        | -0.02       | -0.03 | 0.11         | -0.27       |
| <b>lv-Vys_jl</b>   | 0.07   | -0.09 | -0.13                    | -0.40 | -0.14 | -0.12 | <b>-0.55</b> | -0.35        | -0.08       | -0.01 | 0.45         | 0.43        |
| <b>lv-Vys_aug</b>  | -0.34  | -0.31 | -0.41                    | -0.30 | -0.46 | -0.33 | -0.18        | 0.09         | -0.07       | -0.25 | -0.21        | -0.04       |
| <b>Hum_may</b>     | 0.25   | 0.17  | -0.21                    | 0.42  | -0.24 | 0.13  | -0.13        | -0.09        | -0.28       | -0.13 | 0.07         | -0.42       |
| <b>Hum_jn</b>      | -0.04  | 0.08  | 0.07                     | -0.53 | -0.17 | 0.12  | 0.07         | -0.14        | 0.47        | 0.18  | 0.10         | 0.24        |
| <b>Hum_jl</b>      | 0.09   | 0.03  | 0.03                     | -0.01 | -0.13 | 0.50  | -0.54        | <b>-0.79</b> | 0.08        | 0.24  | 0.37         | 0.38        |
| <b>Hum_aug</b>     | 0.04   | -0.05 | <b>-0.67<sup>†</sup></b> | -0.10 | -0.52 | -0.20 | -0.47        | -0.14        | -0.32       | -0.37 | 0.23         | -0.45       |
| <b>T_may</b>       | -0.51  | -0.41 | 0.35                     | -0.53 | 0.13  | 0.12  | 0.15         | -0.19        | <b>0.61</b> | 0.45  | -0.16        | <b>0.70</b> |
| <b>T_jn</b>        | -0.14  | -0.03 | -0.19                    | -0.01 | -0.27 | 0.48  | -0.45        | <b>-0.57</b> | 0.15        | 0.08  | -0.06        | 0.37        |
| <b>T_jl</b>        | -0.16  | -0.14 | 0.18                     | 0.36  | 0.02  | 0.02  | 0.43         | 0.16         | -0.12       | -0.15 | -0.51        | -0.20       |
| <b>T_aug</b>       | -0.29  | -0.16 | 0.21                     | 0.09  | 0.47  | 0.35  | <b>0.65</b>  | 0.29         | 0.19        | 0.44  | <b>-0.69</b> | 0.11        |
| <b>Prec_jn</b>     | 0.24   | 0.24  | -0.18                    | 0.12  | -0.10 | 0.37  | -0.05        | -0.23        | -0.09       | -0.03 | 0.03         | -0.29       |
| <b>Prec_jl</b>     | -0.02  | -0.18 | -0.16                    | -0.53 | -0.12 | -0.19 | -0.53        | -0.30        | 0.03        | -0.04 | 0.42         | <b>0.55</b> |
| <b>Prec_aug</b>    | -0.43  | -0.41 | -0.21                    | -0.11 | -0.23 | -0.23 | 0.02         | 0.13         | 0.04        | -0.07 | -0.38        | 0.04        |
| <b>Wind_my</b>     | -0.50  | -0.45 | 0.20                     | -0.36 | 0.13  | -0.43 | 0.24         | 0.21         | 0.17        | -0.02 | -0.24        | 0.22        |
| <b>Wind_jn</b>     | -0.07  | -0.01 | 0.23                     | -0.30 | 0.34  | -0.24 | 0.47         | 0.42         | 0.15        | 0.15  | -0.10        | -0.06       |
| <b>Wind_jl</b>     | -0.18  | -0.37 | 0.16                     | -0.23 | 0.33  | -0.15 | 0.08         | 0.02         | -0.18       | 0.14  | 0.01         | 0.32        |
| <b>Wind_aug</b>    | -0.09  | -0.23 | 0.44                     | -0.09 | 0.35  | -0.43 | 0.46         | 0.37         | -0.07       | 0.06  | -0.03        | 0.07        |

\* as in Table S1

\*\* as in Table S1

<sup>†</sup> as in Table S1

Table S5. A Spearman rho correlation matrix for Spruce #3 (continued 1).

| Weather par | orgP         | alcP  | hclP         | orgS  | alcS  | hclS         | orgTi       | alcTi       | hclTi | orgMn | alcMn | hclMn        |
|-------------|--------------|-------|--------------|-------|-------|--------------|-------------|-------------|-------|-------|-------|--------------|
| lv_jn_ind   | -0.13        | 0.20  | 0.29         | -0.37 | -0.08 | <b>-0.56</b> | -0.19       | 0.17        | -0.26 | 0.05  | -0.02 | 0.14         |
| lv_jl_ind   | -0.05        | -0.01 | -0.25        | -0.11 | 0.35  | 0.17         | -0.15       | 0.15        | 0.36  | -0.03 | -0.04 | -0.07        |
| lv_au_ind   | 0.42         | 0.00  | 0.14         | -0.10 | -0.08 | -0.02        | <b>0.58</b> | 0.24        | -0.05 | 0.48  | 0.38  | 0.33         |
| lv-Vys_jn   | -0.26        | 0.15  | 0.18         | -0.19 | -0.03 | <b>-0.63</b> | -0.19       | 0.11        | -0.29 | 0.01  | -0.03 | -0.02        |
| lv-Vys_jl   | -0.07        | 0.05  | -0.26        | -0.02 | 0.28  | 0.22         | -0.12       | 0.24        | 0.30  | 0.02  | -0.04 | -0.02        |
| lv-Vys_aug  | 0.32         | -0.09 | -0.06        | 0.04  | -0.09 | -0.07        | 0.41        | 0.28        | -0.05 | 0.29  | 0.26  | 0.21         |
| Hum_may     | -0.29        | -0.01 | -0.34        | 0.22  | -0.10 | -0.42        | 0.02        | 0.33        | -0.19 | 0.10  | 0.14  | 0.00         |
| Hum_jn      | 0.05         | -0.20 | -0.13        | -0.04 | -0.01 | <b>-0.62</b> | -0.24       | -0.25       | 0.33  | -0.23 | -0.03 | -0.19        |
| Hum_jl      | <b>-0.64</b> | -0.15 | <b>-0.60</b> | -0.03 | 0.31  | -0.19        | -0.27       | 0.28        | 0.24  | -0.42 | -0.36 | <b>-0.58</b> |
| Hum_aug     | 0.08         | 0.22  | -0.18        | 0.18  | -0.26 | -0.21        | -0.01       | <b>0.62</b> | -0.13 | 0.29  | 0.20  | 0.39         |
| T_may       | 0.16         | -0.52 | -0.07        | -0.18 | 0.06  | -0.20        | 0.01        | -0.40       | 0.48  | -0.49 | -0.36 | -0.40        |
| T_jn        | -0.42        | -0.11 | -0.28        | -0.07 | 0.36  | 0.19         | 0.00        | 0.06        | 0.08  | -0.27 | -0.20 | -0.54        |
| T_jl        | 0.00         | -0.25 | 0.01         | -0.12 | -0.17 | -0.44        | 0.24        | 0.10        | -0.46 | -0.19 | -0.19 | -0.08        |
| T_aug       | 0.08         | -0.29 | 0.00         | -0.02 | 0.06  | -0.52        | 0.45        | -0.29       | 0.26  | 0.01  | 0.03  | -0.18        |
| Prec_jn     | -0.37        | 0.06  | 0.14         | -0.19 | -0.03 | <b>-0.63</b> | -0.10       | 0.14        | -0.42 | -0.04 | -0.08 | -0.12        |
| Prec_jl     | 0.13         | 0.03  | -0.13        | -0.08 | 0.24  | 0.35         | -0.23       | 0.09        | 0.38  | -0.10 | -0.15 | 0.06         |
| Prec_aug    | 0.29         | -0.21 | -0.06        | -0.10 | 0.00  | -0.13        | 0.56        | 0.19        | 0.01  | 0.21  | 0.19  | 0.09         |
| Wind_my     | 0.49         | -0.07 | 0.14         | -0.26 | -0.09 | 0.15         | 0.28        | 0.07        | 0.10  | 0.01  | -0.09 | 0.18         |
| Wind_jn     | 0.36         | 0.11  | 0.19         | -0.12 | -0.07 | -0.30        | 0.16        | -0.11       | 0.22  | 0.28  | 0.21  | 0.28         |
| Wind_jl     | 0.23         | -0.16 | -0.23        | 0.20  | -0.13 | 0.02         | -0.08       | 0.12        | 0.37  | -0.20 | -0.30 | 0.14         |
| Wind_aug    | 0.39         | -0.17 | -0.16        | 0.13  | -0.25 | -0.19        | 0.00        | 0.00        | 0.24  | -0.07 | -0.09 | 0.27         |

Table S5. A Spearman rho correlation matrix for Spruce #3 (continued 2).

| Weather par | orgFe       | alcFe | hclFe       | orgCu        | alcCu        | hclCu        | orgZn        | alcZn        | hclZn       |
|-------------|-------------|-------|-------------|--------------|--------------|--------------|--------------|--------------|-------------|
| lv_jn_ind   | 0.05        | 0.03  | -0.09       | -0.09        | 0.07         | -0.25        | -0.18        | -0.19        | -0.12       |
| lv_jl_ind   | -0.48       | 0.08  | 0.09        | 0.40         | 0.20         | 0.26         | <b>0.56</b>  | <b>0.68</b>  | 0.50        |
| lv_au_ind   | -0.09       | 0.05  | <b>0.66</b> | 0.16         | -0.50        | 0.08         | 0.27         | -0.23        | -0.47       |
| lv-Vys_jn   | 0.03        | 0.01  | -0.27       | -0.23        | 0.19         | -0.35        | -0.25        | -0.10        | -0.03       |
| lv-Vys_jl   | -0.49       | 0.20  | 0.03        | 0.42         | 0.21         | 0.34         | <b>0.58</b>  | <b>0.63</b>  | 0.44        |
| lv-Vys_aug  | -0.10       | -0.02 | 0.52        | 0.07         | -0.35        | 0.00         | 0.26         | -0.16        | -0.38       |
| Hum_may     | 0.02        | 0.38  | 0.19        | -0.03        | -0.24        | 0.05         | 0.09         | -0.16        | -0.09       |
| Hum_jn      | 0.07        | -0.27 | -0.29       | -0.18        | 0.48         | -0.38        | -0.13        | 0.13         | 0.25        |
| Hum_jl      | -0.50       | 0.36  | -0.23       | -0.18        | 0.36         | -0.24        | 0.04         | 0.47         | <b>0.74</b> |
| Hum_aug     | -0.12       | 0.41  | 0.18        | 0.34         | -0.06        | 0.34         | 0.48         | -0.13        | -0.29       |
| T_may       | -0.09       | -0.36 | -0.15       | -0.30        | 0.33         | -0.53        | -0.24        | 0.23         | 0.34        |
| T_jn        | -0.19       | 0.01  | 0.03        | -0.34        | 0.01         | -0.44        | -0.11        | 0.18         | 0.32        |
| T_jl        | 0.14        | -0.31 | 0.09        | <b>-0.69</b> | -0.29        | <b>-0.56</b> | <b>-0.75</b> | <b>-0.63</b> | -0.40       |
| T_aug       | <b>0.56</b> | 0.08  | 0.18        | -0.28        | -0.39        | -0.41        | -0.14        | -0.29        | -0.37       |
| Prec_jn     | -0.05       | 0.02  | -0.19       | -0.37        | 0.08         | -0.46        | -0.37        | -0.15        | -0.03       |
| Prec_jl     | -0.33       | -0.03 | -0.07       | 0.46         | 0.30         | 0.34         | <b>0.57</b>  | <b>0.62</b>  | 0.36        |
| Prec_aug    | -0.02       | -0.01 | <b>0.66</b> | -0.08        | <b>-0.55</b> | -0.16        | 0.10         | -0.26        | -0.40       |
| Wind_my     | -0.12       | -0.26 | 0.12        | -0.07        | -0.01        | -0.06        | -0.16        | -0.22        | -0.19       |
| Wind_jn     | 0.20        | -0.01 | -0.01       | 0.17         | 0.04         | 0.13         | 0.07         | -0.12        | -0.19       |
| Wind_jl     | -0.03       | 0.21  | -0.25       | 0.30         | 0.24         | 0.35         | 0.38         | 0.23         | 0.03        |
| Wind_aug    | 0.07        | -0.01 | -0.10       | 0.17         | 0.13         | 0.31         | 0.07         | -0.07        | -0.08       |

Table S6. A Kendall tau correlation matrix for Spruce #3.

| Weather par        | orgCa* | alcCa | hclCa                    | orgSr | alcSr | hclSr | orgK         | alcK         | hclK        | orgAl | alcAl        | hclAl       |
|--------------------|--------|-------|--------------------------|-------|-------|-------|--------------|--------------|-------------|-------|--------------|-------------|
| <b>lv_jn_ind**</b> | 0.15   | 0.15  | -0.26                    | 0.08  | -0.08 | 0.18  | -0.13        | -0.13        | 0.10        | -0.03 | 0.13         | -0.21       |
| <b>lv_jl_ind</b>   | 0.00   | -0.10 | -0.10                    | -0.28 | -0.18 | -0.08 | <b>-0.44</b> | -0.28        | 0.00        | 0.03  | 0.38         | 0.36        |
| <b>lv_au_ind</b>   | -0.31  | -0.26 | -0.26                    | -0.13 | -0.18 | -0.28 | 0.03         | 0.18         | 0.00        | -0.13 | -0.18        | -0.05       |
| <b>lv-Vys_jn</b>   | 0.21   | 0.21  | -0.15                    | -0.03 | -0.08 | 0.23  | -0.08        | -0.08        | 0.00        | -0.03 | 0.08         | -0.21       |
| <b>lv-Vys_jl</b>   | 0.03   | -0.08 | -0.08                    | -0.26 | -0.15 | -0.10 | -0.41        | -0.21        | -0.08       | 0.00  | 0.36         | 0.33        |
| <b>lv-Vys_aug</b>  | -0.23  | -0.23 | -0.28                    | -0.26 | -0.31 | -0.26 | -0.10        | 0.05         | -0.08       | -0.21 | -0.15        | 0.03        |
| <b>Hum_may</b>     | 0.23   | 0.13  | -0.18                    | 0.26  | -0.15 | 0.05  | -0.10        | -0.10        | -0.23       | -0.05 | 0.05         | -0.33       |
| <b>Hum_jn</b>      | -0.05  | 0.05  | 0.05                     | -0.38 | -0.18 | 0.08  | 0.13         | -0.08        | 0.31        | 0.13  | 0.03         | 0.15        |
| <b>Hum_jl</b>      | 0.08   | -0.03 | 0.03                     | 0.05  | -0.05 | 0.41  | -0.41        | <b>-0.67</b> | 0.08        | 0.15  | 0.31         | 0.28        |
| <b>Hum_aug</b>     | 0.06   | 0.01  | <b>-0.50<sup>†</sup></b> | -0.06 | -0.35 | -0.09 | -0.35        | -0.09        | -0.22       | -0.25 | 0.14         | -0.32       |
| <b>T_may</b>       | -0.38  | -0.28 | 0.23                     | -0.41 | 0.10  | 0.10  | 0.15         | -0.15        | <b>0.49</b> | 0.26  | -0.15        | <b>0.54</b> |
| <b>T_jn</b>        | -0.08  | -0.08 | -0.18                    | 0.00  | -0.15 | 0.36  | -0.31        | -0.36        | 0.08        | 0.05  | -0.10        | 0.23        |
| <b>T_jl</b>        | -0.10  | -0.10 | 0.15                     | 0.28  | 0.03  | 0.08  | 0.28         | 0.08         | -0.10       | -0.08 | -0.38        | -0.15       |
| <b>T_aug</b>       | -0.23  | -0.08 | 0.13                     | 0.00  | 0.31  | 0.21  | <b>0.51</b>  | 0.26         | 0.18        | 0.31  | <b>-0.51</b> | 0.03        |
| <b>Prec_jn</b>     | 0.18   | 0.23  | -0.13                    | 0.05  | -0.10 | 0.26  | -0.05        | -0.15        | -0.03       | -0.05 | 0.05         | -0.18       |
| <b>Prec_jl</b>     | -0.03  | -0.13 | -0.08                    | -0.36 | -0.10 | -0.15 | -0.36        | -0.21        | -0.03       | 0.00  | 0.31         | <b>0.44</b> |
| <b>Prec_aug</b>    | -0.36  | -0.31 | -0.15                    | -0.13 | -0.18 | -0.18 | 0.03         | 0.08         | 0.05        | -0.08 | -0.28        | 0.05        |
| <b>Wind_my</b>     | -0.37  | -0.43 | 0.14                     | -0.25 | 0.09  | -0.37 | 0.14         | 0.14         | 0.12        | -0.06 | -0.14        | 0.17        |
| <b>Wind_jn</b>     | -0.09  | -0.04 | 0.22                     | -0.19 | 0.32  | -0.14 | 0.35         | 0.30         | 0.12        | 0.06  | -0.04        | -0.04       |
| <b>Wind_jl</b>     | -0.07  | -0.25 | 0.14                     | -0.17 | 0.27  | -0.09 | 0.01         | 0.01         | -0.17       | 0.12  | 0.01         | 0.25        |
| <b>Wind_aug</b>    | -0.04  | -0.17 | 0.33                     | -0.07 | 0.25  | -0.33 | 0.33         | 0.33         | -0.04       | 0.01  | -0.04        | 0.04        |

\* as in Table S1

\*\* as in Table S1

<sup>†</sup> as in Table S1

Table S6. A Kendall tau correlation matrix for Spruce #3 (continued 1).

| Weather par | orgP         | alcP  | hclP         | orgS  | alcS  | hclS         | orgTi | alcTi       | hclTi | orgMn | alcMn | hclMn        |
|-------------|--------------|-------|--------------|-------|-------|--------------|-------|-------------|-------|-------|-------|--------------|
| lv_jn_ind   | -0.13        | 0.13  | 0.16         | -0.26 | -0.09 | <b>-0.45</b> | -0.13 | 0.15        | -0.15 | 0.03  | -0.03 | 0.10         |
| lv_jl_ind   | 0.03         | 0.03  | -0.24        | -0.10 | 0.32  | 0.12         | -0.08 | 0.10        | 0.26  | -0.03 | -0.08 | -0.05        |
| lv_au_ind   | 0.28         | 0.03  | 0.08         | -0.05 | -0.09 | -0.02        | 0.38  | 0.15        | 0.00  | 0.33  | 0.28  | 0.26         |
| lv-Vys_jn   | -0.23        | 0.13  | 0.11         | -0.21 | -0.04 | <b>-0.54</b> | -0.13 | 0.10        | -0.15 | -0.03 | -0.03 | 0.00         |
| lv-Vys_jl   | 0.05         | 0.05  | -0.21        | -0.03 | 0.30  | 0.17         | -0.05 | 0.18        | 0.18  | 0.00  | -0.05 | -0.03        |
| lv-Vys_aug  | 0.21         | -0.05 | 0.00         | 0.08  | -0.06 | -0.07        | 0.26  | 0.18        | -0.03 | 0.21  | 0.21  | 0.13         |
| Hum_may     | -0.15        | 0.00  | -0.32        | 0.13  | -0.12 | -0.35        | -0.05 | 0.18        | -0.18 | 0.05  | 0.10  | 0.03         |
| Hum_jn      | -0.03        | -0.13 | -0.16        | -0.05 | -0.01 | <b>-0.50</b> | -0.18 | -0.15       | 0.26  | -0.18 | -0.08 | -0.10        |
| Hum_jl      | <b>-0.46</b> | -0.10 | <b>-0.43</b> | 0.03  | 0.25  | -0.17        | -0.21 | 0.23        | 0.18  | -0.26 | -0.26 | -0.38        |
| Hum_aug     | 0.06         | 0.17  | -0.13        | 0.19  | -0.21 | -0.17        | -0.04 | <b>0.43</b> | -0.06 | 0.22  | 0.12  | 0.27         |
| T_may       | 0.10         | -0.31 | -0.11        | -0.13 | 0.01  | -0.17        | -0.05 | -0.33       | 0.38  | -0.31 | -0.21 | -0.23        |
| T_jn        | -0.26        | -0.05 | -0.24        | -0.13 | 0.19  | 0.17         | 0.00  | 0.03        | 0.03  | -0.10 | -0.05 | <b>-0.44</b> |
| T_jl        | -0.03        | -0.23 | 0.00         | -0.05 | -0.19 | -0.35        | 0.08  | 0.05        | -0.31 | -0.18 | -0.13 | -0.05        |
| T_aug       | 0.05         | -0.15 | 0.00         | -0.03 | -0.04 | <b>-0.45</b> | 0.36  | -0.18       | 0.18  | 0.00  | 0.00  | -0.13        |
| Prec_jn     | -0.31        | 0.10  | 0.05         | -0.18 | -0.01 | <b>-0.54</b> | -0.10 | 0.08        | -0.23 | -0.05 | -0.05 | -0.08        |
| Prec_jl     | 0.10         | 0.00  | -0.11        | -0.08 | 0.22  | 0.31         | -0.10 | 0.03        | 0.28  | -0.05 | -0.10 | 0.03         |
| Prec_aug    | 0.18         | -0.13 | -0.03        | -0.05 | 0.01  | -0.12        | 0.33  | 0.05        | 0.00  | 0.13  | 0.13  | 0.05         |
| Wind_my     | 0.35         | -0.06 | 0.16         | -0.19 | -0.08 | 0.12         | 0.19  | 0.09        | 0.06  | -0.01 | -0.06 | 0.14         |
| Wind_jn     | 0.27         | 0.04  | 0.17         | -0.01 | 0.00  | -0.26        | 0.14  | -0.06       | 0.19  | 0.19  | 0.14  | 0.19         |
| Wind_jl     | 0.14         | -0.12 | -0.15        | 0.17  | -0.11 | 0.00         | -0.01 | 0.14        | 0.25  | -0.17 | -0.22 | 0.07         |
| Wind_aug    | 0.33         | -0.12 | -0.08        | 0.07  | -0.18 | -0.17        | 0.01  | 0.01        | 0.17  | -0.12 | -0.12 | 0.20         |

Table S6. A Kendall tau correlation matrix for Spruce #3 (continued 2).

| Weather par | orgFe | alcFe | hclFe       | orgCu        | alcCu | hclCu | orgZn        | alcZn        | hclZn       |
|-------------|-------|-------|-------------|--------------|-------|-------|--------------|--------------|-------------|
| lv_jn_ind   | 0.05  | 0.00  | -0.08       | -0.10        | 0.05  | -0.21 | -0.18        | -0.18        | 0.00        |
| lv_jl_ind   | -0.31 | 0.00  | 0.08        | 0.31         | 0.15  | 0.21  | 0.38         | <b>0.54</b>  | 0.36        |
| lv_au_ind   | -0.10 | 0.05  | <b>0.44</b> | 0.10         | -0.36 | 0.05  | 0.13         | -0.13        | -0.36       |
| lv-Vys_jn   | 0.00  | 0.00  | -0.18       | -0.15        | 0.10  | -0.26 | -0.18        | -0.08        | 0.00        |
| lv-Vys_jl   | -0.33 | 0.13  | 0.00        | 0.28         | 0.18  | 0.23  | 0.41         | <b>0.46</b>  | 0.33        |
| lv-Vys_aug  | -0.13 | 0.08  | 0.31        | 0.03         | -0.28 | -0.03 | 0.15         | -0.10        | -0.33       |
| Hum_may     | -0.03 | 0.23  | 0.10        | -0.08        | -0.13 | 0.08  | 0.05         | -0.10        | -0.08       |
| Hum_jn      | 0.05  | -0.21 | -0.18       | -0.15        | 0.31  | -0.31 | -0.13        | 0.13         | 0.21        |
| Hum_jl      | -0.38 | 0.28  | -0.15       | -0.08        | 0.28  | -0.08 | 0.10         | 0.31         | <b>0.54</b> |
| Hum_aug     | -0.12 | 0.25  | 0.17        | 0.25         | -0.04 | 0.27  | 0.37         | -0.09        | -0.25       |
| T_may       | -0.08 | -0.23 | -0.10       | -0.23        | 0.23  | -0.33 | -0.15        | 0.21         | 0.28        |
| T_jn        | -0.13 | 0.03  | 0.00        | -0.23        | -0.03 | -0.33 | -0.10        | 0.10         | 0.23        |
| T_jl        | 0.10  | -0.26 | -0.03       | <b>-0.51</b> | -0.15 | -0.41 | <b>-0.59</b> | <b>-0.49</b> | -0.31       |
| T_aug       | 0.38  | 0.08  | 0.15        | -0.18        | -0.33 | -0.28 | -0.10        | -0.21        | -0.23       |
| Prec_jn     | -0.03 | 0.03  | -0.15       | -0.23        | 0.03  | -0.33 | -0.26        | -0.15        | 0.03        |
| Prec_jl     | -0.18 | -0.03 | -0.05       | 0.33         | 0.18  | 0.23  | 0.41         | <b>0.46</b>  | 0.23        |
| Prec_aug    | -0.05 | 0.05  | <b>0.44</b> | -0.10        | -0.41 | -0.15 | 0.03         | -0.18        | -0.31       |
| Wind_my     | -0.09 | -0.09 | 0.09        | -0.04        | -0.01 | -0.01 | -0.12        | -0.12        | -0.12       |
| Wind_jn     | 0.14  | 0.04  | -0.01       | 0.14         | -0.01 | 0.09  | 0.06         | -0.06        | -0.19       |
| Wind_jl     | -0.07 | 0.14  | -0.22       | 0.22         | 0.14  | 0.22  | 0.27         | 0.17         | -0.01       |
| Wind_aug    | 0.07  | 0.04  | -0.07       | 0.12         | 0.12  | 0.22  | 0.04         | -0.07        | -0.09       |

Table S7. A Spearman rho correlation matrix for Siberian pine #1.

| Weather par | orgCa*                  | alcCa       | hclCa | orgSr | alcSr        | hclSr       | orgK  | alcK  | hclK  | orgAl | alcAl | hclAl       |
|-------------|-------------------------|-------------|-------|-------|--------------|-------------|-------|-------|-------|-------|-------|-------------|
| lv_jn_ind** | 0.44                    | 0.36        | -0.16 | 0.01  | 0.22         | <b>0.62</b> | -0.04 | -0.07 | -0.01 | 0.45  | -0.34 | 0.34        |
| lv_jl_ind   | -0.35                   | -0.40       | 0.24  | -0.31 | 0.40         | 0.18        | -0.01 | 0.19  | -0.36 | 0.04  | -0.25 | 0.40        |
| lv_au_ind   | -0.40                   | -0.48       | -0.02 | 0.34  | -0.12        | -0.08       | 0.09  | 0.12  | -0.10 | 0.17  | -0.32 | 0.46        |
| lv-Vys_jn   | 0.49                    | 0.41        | 0.02  | 0.07  | 0.06         | 0.50        | 0.05  | -0.19 | 0.07  | 0.20  | -0.21 | 0.29        |
| lv-Vys_jl   | -0.30                   | -0.35       | 0.20  | -0.27 | 0.42         | 0.27        | -0.03 | 0.10  | -0.32 | -0.01 | -0.24 | 0.40        |
| lv-Vys_aug  | -0.35                   | -0.42       | 0.24  | 0.18  | -0.12        | 0.09        | -0.10 | -0.09 | -0.09 | 0.09  | -0.27 | <b>0.58</b> |
| Hum_may     | -0.26                   | -0.23       | 0.02  | -0.25 | -0.46        | 0.17        | 0.04  | 0.08  | 0.25  | -0.15 | 0.22  | -0.24       |
| Hum_jn      | <b>0.64<sup>†</sup></b> | <b>0.58</b> | 0.01  | -0.01 | -0.04        | 0.38        | -0.20 | -0.40 | -0.07 | 0.20  | 0.00  | 0.10        |
| Hum_jl      | -0.25                   | -0.34       | 0.13  | 0.01  | -0.07        | 0.53        | 0.06  | -0.03 | 0.01  | -0.01 | -0.21 | 0.24        |
| Hum_aug     | -0.41                   | -0.53       | 0.44  | -0.19 | -0.07        | 0.34        | 0.01  | -0.04 | -0.07 | -0.11 | -0.04 | 0.50        |
| T_may       | 0.14                    | 0.15        | 0.28  | 0.12  | 0.02         | -0.31       | -0.24 | -0.48 | -0.35 | -0.32 | -0.03 | 0.25        |
| T_jn        | -0.12                   | -0.21       | -0.07 | -0.04 | -0.10        | -0.09       | -0.31 | -0.07 | -0.32 | 0.26  | 0.05  | 0.19        |
| T_jl        | 0.42                    | 0.46        | 0.27  | 0.23  | 0.03         | 0.01        | -0.06 | -0.40 | 0.52  | -0.31 | 0.14  | 0.13        |
| T_aug       | -0.05                   | 0.08        | -0.23 | 0.18  | <b>-0.73</b> | -0.21       | 0.23  | -0.03 | 0.16  | -0.23 | -0.03 | -0.38       |
| Prec_jn     | 0.45                    | 0.36        | 0.06  | 0.19  | 0.10         | 0.53        | 0.05  | -0.20 | 0.20  | 0.20  | -0.27 | 0.37        |
| Prec_jl     | -0.32                   | -0.30       | 0.19  | -0.25 | <b>0.59</b>  | 0.15        | 0.00  | 0.20  | -0.27 | 0.03  | -0.23 | 0.29        |
| Prec_aug    | -0.19                   | -0.24       | 0.03  | 0.48  | -0.26        | 0.02        | 0.02  | -0.08 | 0.14  | 0.16  | -0.31 | 0.40        |
| Wind_my     | 0.26                    | 0.32        | 0.06  | 0.21  | 0.40         | -0.06       | 0.20  | -0.08 | 0.19  | -0.09 | -0.03 | 0.18        |
| Wind_jn     | 0.27                    | 0.35        | 0.35  | 0.07  | 0.26         | -0.01       | 0.18  | -0.15 | 0.05  | -0.15 | -0.09 | 0.13        |
| Wind_jl     | -0.26                   | -0.17       | 0.13  | -0.04 | 0.12         | -0.17       | 0.09  | 0.21  | -0.02 | -0.17 | -0.12 | -0.29       |
| Wind_aug    | -0.02                   | 0.11        | 0.10  | 0.18  | 0.23         | -0.04       | -0.14 | 0.02  | 0.45  | -0.15 | -0.27 | -0.06       |

\* as in Table S1

\*\* as in Table S1

<sup>†</sup> as in Table S1

Table S7. A Spearman rho correlation matrix for Siberian pine #1 (continued 1).

| Weather par | orgP         | alcP  | hclP  | orgS  | alcS  | hclS  | orgTi        | alcTi       | hclTi       | orgMn        | alcMn        | hclMn |
|-------------|--------------|-------|-------|-------|-------|-------|--------------|-------------|-------------|--------------|--------------|-------|
| Iv_jn_ind   | -0.03        | 0.24  | 0.06  | -0.24 | 0.16  | 0.13  | <b>0.60</b>  | 0.20        | <b>0.65</b> | 0.45         | <b>0.60</b>  | 0.35  |
| Iv_jl_ind   | <b>-0.68</b> | -0.21 | -0.29 | -0.19 | -0.12 | -0.06 | -0.24        | -0.03       | 0.21        | 0.15         | 0.27         | 0.33  |
| Iv_au_ind   | -0.19        | 0.03  | 0.30  | 0.48  | 0.12  | 0.02  | -0.48        | -0.34       | -0.18       | -0.32        | -0.48        | 0.15  |
| Iv-Vys_jn   | 0.06         | 0.16  | 0.00  | -0.21 | 0.29  | 0.04  | 0.51         | 0.34        | 0.54        | 0.34         | 0.54         | 0.35  |
| Iv-Vys_jl   | <b>-0.74</b> | -0.12 | -0.21 | -0.16 | -0.03 | -0.03 | -0.16        | -0.13       | 0.32        | 0.15         | 0.26         | 0.15  |
| Iv-Vys_aug  | -0.31        | -0.10 | 0.11  | 0.43  | 0.17  | -0.07 | <b>-0.57</b> | -0.26       | 0.03        | -0.14        | -0.36        | 0.06  |
| Hum_may     | -0.09        | 0.05  | -0.19 | 0.03  | -0.03 | -0.20 | -0.16        | 0.13        | 0.28        | -0.14        | -0.19        | -0.24 |
| Hum_jn      | 0.32         | 0.09  | -0.03 | 0.00  | 0.15  | 0.06  | 0.41         | 0.09        | 0.38        | 0.47         | 0.47         | 0.05  |
| Hum_jl      | -0.37        | 0.04  | 0.00  | 0.25  | 0.23  | -0.37 | -0.20        | -0.27       | 0.47        | 0.14         | 0.15         | -0.04 |
| Hum_aug     | <b>-0.75</b> | 0.17  | -0.05 | 0.12  | 0.37  | -0.02 | -0.34        | -0.21       | 0.28        | -0.05        | -0.09        | -0.12 |
| T_may       | 0.06         | -0.50 | -0.09 | 0.33  | -0.01 | -0.03 | -0.45        | -0.18       | -0.29       | -0.06        | -0.20        | -0.10 |
| T_jn        | 0.08         | -0.03 | 0.14  | 0.43  | -0.15 | -0.06 | -0.38        | -0.52       | -0.12       | 0.17         | -0.18        | -0.16 |
| T_jl        | 0.25         | -0.25 | -0.04 | -0.30 | 0.25  | -0.42 | 0.07         | <b>0.59</b> | 0.37        | 0.15         | 0.13         | -0.07 |
| T_aug       | 0.46         | -0.27 | -0.16 | 0.38  | -0.20 | -0.04 | -0.27        | 0.26        | -0.14       | <b>-0.57</b> | <b>-0.57</b> | 0.05  |
| Prec_jn     | 0.10         | 0.08  | 0.06  | -0.19 | 0.34  | -0.18 | 0.42         | 0.37        | <b>0.60</b> | 0.38         | <b>0.55</b>  | 0.38  |
| Prec_jl     | <b>-0.66</b> | -0.23 | -0.30 | -0.25 | -0.20 | -0.08 | -0.20        | -0.07       | 0.21        | 0.18         | 0.25         | 0.22  |
| Prec_aug    | 0.10         | -0.03 | 0.30  | 0.55  | 0.21  | -0.12 | -0.43        | -0.20       | -0.07       | -0.24        | -0.47        | 0.09  |
| Wind_my     | -0.10        | -0.05 | -0.09 | -0.31 | 0.04  | -0.01 | 0.14         | 0.33        | 0.23        | 0.01         | 0.04         | 0.14  |
| Wind_jn     | -0.09        | -0.11 | -0.29 | -0.28 | 0.13  | 0.24  | 0.18         | 0.45        | -0.04       | -0.04        | 0.16         | 0.34  |
| Wind_jl     | -0.06        | -0.09 | -0.05 | -0.11 | -0.01 | 0.18  | 0.06         | 0.04        | -0.54       | -0.22        | 0.04         | 0.11  |
| Wind_aug    | 0.01         | -0.10 | 0.20  | -0.41 | 0.22  | 0.19  | 0.35         | 0.44        | -0.20       | -0.20        | 0.03         | -0.01 |

Table S7. A Spearman rho correlation matrix for Siberian pine #1 (continued 2).

| Weather par | orgFe        | alcFe | hclFe       | orgCu | alcCu        | hclCu        | orgZn | alcZn        | hclZn |
|-------------|--------------|-------|-------------|-------|--------------|--------------|-------|--------------|-------|
| lv_jn_ind   | 0.22         | 0.14  | -0.04       | -0.27 | <b>-0.57</b> | <b>-0.60</b> | -0.23 | -0.38        | 0.20  |
| lv_jl_ind   | <b>-0.60</b> | -0.17 | -0.46       | 0.11  | -0.34        | 0.06         | -0.45 | -0.45        | -0.17 |
| lv_au_ind   | -0.35        | 0.25  | -0.09       | 0.41  | 0.21         | 0.35         | -0.49 | -0.22        | 0.37  |
| lv-Vys_jn   | 0.09         | 0.06  | 0.01        | -0.33 | -0.43        | <b>-0.60</b> | -0.19 | -0.25        | 0.12  |
| lv-Vys_jl   | <b>-0.58</b> | -0.33 | -0.47       | 0.04  | -0.46        | 0.01         | -0.38 | <b>-0.61</b> | -0.29 |
| lv-Vys_aug  | -0.19        | 0.34  | 0.00        | 0.06  | -0.08        | 0.15         | -0.46 | -0.41        | 0.14  |
| Hum_may     | 0.20         | 0.02  | 0.10        | -0.13 | 0.03         | -0.13        | 0.26  | -0.13        | -0.28 |
| Hum_jn      | 0.37         | 0.09  | 0.14        | -0.44 | -0.41        | <b>-0.62</b> | 0.07  | -0.10        | 0.07  |
| Hum_jl      | -0.46        | -0.18 | -0.24       | -0.12 | -0.28        | -0.30        | -0.31 | <b>-0.68</b> | -0.32 |
| Hum_aug     | -0.50        | -0.21 | -0.45       | -0.05 | -0.35        | 0.15         | -0.26 | <b>-0.62</b> | -0.15 |
| T_may       | -0.21        | -0.13 | 0.16        | -0.09 | -0.05        | -0.01        | -0.18 | -0.10        | -0.23 |
| T_jn        | -0.01        | 0.19  | -0.06       | 0.22  | 0.10         | 0.05         | 0.02  | -0.07        | 0.35  |
| T_jl        | 0.52         | 0.32  | <b>0.65</b> | -0.54 | -0.09        | -0.53        | 0.23  | 0.01         | -0.12 |
| T_aug       | 0.27         | 0.19  | 0.51        | 0.06  | 0.40         | -0.07        | -0.05 | 0.21         | -0.24 |
| Prec_jn     | 0.12         | 0.24  | 0.14        | -0.38 | -0.38        | <b>-0.70</b> | -0.24 | -0.29        | 0.14  |
| Prec_jl     | -0.43        | -0.14 | -0.35       | 0.04  | -0.36        | 0.16         | -0.40 | -0.41        | -0.29 |
| Prec_aug    | 0.05         | 0.54  | 0.27        | 0.08  | 0.18         | 0.10         | -0.41 | -0.16        | 0.29  |
| Wind_my     | 0.14         | 0.07  | 0.18        | -0.08 | -0.11        | 0.04         | -0.13 | -0.01        | 0.01  |
| Wind_jn     | 0.04         | 0.09  | 0.06        | -0.30 | -0.24        | 0.14         | -0.29 | 0.17         | -0.16 |
| Wind_jl     | -0.28        | -0.15 | -0.17       | -0.01 | 0.11         | 0.40         | -0.10 | 0.29         | -0.32 |
| Wind_aug    | 0.46         | 0.25  | 0.40        | -0.44 | -0.17        | 0.04         | 0.07  | 0.11         | -0.31 |

Table S8. A Kendall tau correlation matrix for Siberian pine #1.

| Weather par | orgCa*                  | alcCa | hclCa | orgSr | alcSr        | hclSr       | orgK  | alcK  | hclK  | orgAl | alcAl | hclAl       |
|-------------|-------------------------|-------|-------|-------|--------------|-------------|-------|-------|-------|-------|-------|-------------|
| lv_jn_ind** | 0.31                    | 0.28  | -0.08 | -0.05 | 0.18         | <b>0.44</b> | -0.05 | -0.08 | -0.05 | 0.33  | -0.23 | 0.26        |
| lv_jl_ind   | -0.28                   | -0.26 | 0.15  | -0.18 | 0.26         | 0.10        | 0.03  | 0.10  | -0.28 | 0.05  | -0.21 | 0.23        |
| lv_au_ind   | -0.28                   | -0.36 | 0.00  | 0.23  | -0.05        | 0.00        | 0.08  | 0.10  | -0.03 | 0.15  | -0.21 | 0.28        |
| lv-Vys_jn   | 0.33                    | 0.31  | 0.10  | 0.03  | 0.15         | 0.36        | -0.03 | -0.15 | 0.03  | 0.10  | -0.10 | 0.18        |
| lv-Vys_jl   | -0.23                   | -0.26 | 0.15  | -0.18 | 0.26         | 0.15        | 0.03  | 0.05  | -0.23 | 0.00  | -0.15 | 0.23        |
| lv-Vys_aug  | -0.23                   | -0.31 | 0.15  | 0.13  | -0.05        | 0.05        | -0.08 | -0.05 | -0.08 | 0.05  | -0.15 | <b>0.44</b> |
| Hum_may     | -0.18                   | -0.15 | 0.05  | -0.18 | -0.41        | 0.10        | 0.03  | 0.10  | 0.18  | -0.10 | 0.21  | -0.18       |
| Hum_jn      | <b>0.44<sup>†</sup></b> | 0.36  | 0.05  | 0.03  | 0.05         | 0.26        | -0.18 | -0.26 | -0.08 | 0.10  | 0.00  | 0.08        |
| Hum_jl      | -0.15                   | -0.23 | 0.13  | 0.00  | -0.03        | 0.33        | 0.05  | -0.03 | 0.05  | -0.03 | -0.13 | 0.15        |
| Hum_aug     | -0.27                   | -0.35 | 0.22  | -0.14 | -0.01        | 0.30        | -0.04 | -0.06 | -0.04 | -0.06 | -0.01 | 0.30        |
| T_may       | 0.08                    | 0.10  | 0.15  | 0.08  | -0.05        | -0.26       | -0.18 | -0.31 | -0.28 | -0.21 | -0.05 | 0.18        |
| T_jn        | -0.03                   | -0.10 | -0.05 | -0.03 | -0.05        | -0.10       | -0.18 | -0.05 | -0.28 | 0.21  | 0.05  | 0.13        |
| T_jl        | 0.26                    | 0.28  | 0.18  | 0.21  | 0.03         | -0.03       | -0.05 | -0.33 | 0.36  | -0.23 | 0.08  | 0.10        |
| T_aug       | -0.08                   | 0.00  | -0.21 | 0.08  | <b>-0.56</b> | -0.15       | 0.23  | 0.00  | 0.08  | -0.21 | 0.05  | -0.33       |
| Prec_jn     | 0.26                    | 0.23  | 0.08  | 0.10  | 0.13         | 0.33        | 0.05  | -0.13 | 0.10  | 0.13  | -0.18 | 0.26        |
| Prec_jl     | -0.23                   | -0.21 | 0.15  | -0.13 | 0.41         | 0.05        | -0.03 | 0.10  | -0.23 | 0.05  | -0.21 | 0.13        |
| Prec_aug    | -0.13                   | -0.15 | 0.05  | 0.33  | -0.15        | 0.00        | 0.03  | -0.05 | 0.13  | 0.10  | -0.21 | 0.23        |
| Wind_my     | 0.21                    | 0.23  | 0.03  | 0.18  | 0.26         | -0.03       | 0.16  | -0.03 | 0.13  | -0.08 | -0.05 | 0.16        |
| Wind_jn     | 0.22                    | 0.27  | 0.27  | 0.06  | 0.12         | -0.01       | 0.12  | -0.12 | 0.04  | -0.06 | -0.19 | 0.17        |
| Wind_jl     | -0.17                   | -0.09 | 0.06  | 0.01  | 0.14         | -0.09       | 0.09  | 0.14  | -0.04 | -0.12 | -0.04 | -0.19       |
| Wind_aug    | -0.01                   | 0.12  | 0.09  | 0.14  | 0.25         | 0.01        | -0.17 | 0.01  | 0.35  | -0.09 | -0.22 | -0.04       |

\* as in Table S1

\*\* as in Table S1

<sup>†</sup> as in Table S1

Table S8. A Kendall tau correlation matrix for Siberian pine #1 (continued 1).

| Weather par | orgP         | alcP  | hclP  | orgS  | alcS  | hclS  | orgTi        | alcTi       | hclTi       | orgMn | alcMn       | hclMn |
|-------------|--------------|-------|-------|-------|-------|-------|--------------|-------------|-------------|-------|-------------|-------|
| lv_jn_ind   | 0.00         | 0.13  | 0.05  | -0.18 | 0.10  | 0.10  | <b>0.44</b>  | 0.21        | <b>0.44</b> | 0.31  | <b>0.46</b> | 0.23  |
| lv_jl_ind   | <b>-0.54</b> | -0.15 | -0.28 | -0.10 | -0.08 | 0.03  | -0.15        | 0.03        | 0.15        | 0.13  | 0.18        | 0.26  |
| lv_au_ind   | -0.18        | 0.05  | 0.23  | 0.36  | 0.13  | 0.08  | -0.31        | -0.23       | -0.10       | -0.18 | -0.33       | 0.05  |
| lv-Vys_jn   | 0.03         | 0.10  | -0.03 | -0.15 | 0.18  | 0.08  | 0.36         | 0.28        | 0.36        | 0.23  | 0.38        | 0.21  |
| lv-Vys_jl   | <b>-0.54</b> | -0.10 | -0.13 | -0.10 | -0.03 | -0.03 | -0.10        | -0.08       | 0.26        | 0.13  | 0.18        | 0.10  |
| lv-Vys_aug  | -0.18        | -0.10 | 0.08  | 0.26  | 0.13  | -0.08 | <b>-0.46</b> | -0.23       | 0.10        | -0.03 | -0.23       | 0.05  |
| Hum_may     | -0.08        | 0.05  | -0.13 | 0.05  | -0.08 | -0.13 | -0.10        | 0.08        | 0.21        | -0.08 | -0.18       | -0.15 |
| Hum_jn      | 0.18         | 0.05  | -0.03 | 0.00  | 0.08  | 0.03  | 0.26         | 0.08        | 0.26        | 0.38  | 0.28        | 0.00  |
| Hum_jl      | -0.26        | 0.03  | 0.05  | 0.23  | 0.15  | -0.21 | -0.13        | -0.15       | <b>0.44</b> | 0.10  | 0.10        | -0.03 |
| Hum_aug     | <b>-0.58</b> | 0.09  | -0.04 | 0.06  | 0.32  | -0.01 | -0.27        | -0.14       | 0.30        | 0.01  | -0.04       | -0.06 |
| T_may       | 0.03         | -0.36 | -0.08 | 0.21  | -0.08 | 0.03  | -0.31        | -0.08       | -0.21       | -0.03 | -0.13       | -0.05 |
| T_jn        | 0.08         | 0.00  | 0.08  | 0.26  | -0.13 | -0.03 | -0.26        | -0.38       | -0.05       | 0.13  | -0.13       | -0.10 |
| T_jl        | 0.21         | -0.18 | -0.05 | -0.23 | 0.21  | -0.31 | 0.08         | <b>0.51</b> | 0.33        | 0.10  | 0.15        | -0.03 |
| T_aug       | 0.23         | -0.21 | -0.13 | 0.26  | -0.08 | -0.03 | -0.21        | 0.18        | -0.10       | -0.33 | -0.38       | 0.05  |
| Prec_jn     | 0.05         | 0.08  | 0.00  | -0.13 | 0.26  | -0.10 | 0.28         | 0.31        | <b>0.44</b> | 0.26  | 0.36        | 0.23  |
| Prec_jl     | <b>-0.54</b> | -0.15 | -0.23 | -0.15 | -0.18 | -0.03 | -0.15        | -0.03       | 0.21        | 0.13  | 0.18        | 0.10  |
| Prec_aug    | 0.03         | 0.00  | 0.18  | 0.41  | 0.13  | -0.03 | -0.26        | -0.13       | -0.05       | -0.13 | -0.33       | 0.05  |
| Wind_my     | -0.08        | -0.03 | -0.03 | -0.18 | 0.03  | -0.03 | 0.10         | 0.21        | 0.16        | -0.03 | -0.03       | 0.10  |
| Wind_jn     | -0.04        | -0.06 | -0.09 | -0.22 | 0.06  | 0.17  | 0.14         | 0.30        | -0.04       | -0.06 | 0.14        | 0.25  |
| Wind_jl     | -0.04        | -0.06 | -0.09 | -0.01 | 0.06  | 0.12  | -0.01        | -0.01       | -0.35       | -0.12 | -0.01       | 0.04  |
| Wind_aug    | -0.01        | -0.04 | 0.14  | -0.30 | 0.12  | 0.09  | 0.22         | 0.30        | -0.17       | -0.14 | 0.06        | -0.04 |

Table S8. A Kendall tau correlation matrix for Siberian pine #1 (continued 2).

| Weather par | orgFe | alcFe       | hclFe       | orgCu | alcCu | hclCu        | orgZn | alcZn        | hclZn |
|-------------|-------|-------------|-------------|-------|-------|--------------|-------|--------------|-------|
| lv_jn_ind   | 0.18  | 0.08        | -0.03       | -0.18 | -0.41 | <b>-0.46</b> | -0.13 | -0.31        | 0.13  |
| lv_jl_ind   | -0.41 | -0.15       | -0.31       | 0.10  | -0.23 | 0.08         | -0.31 | -0.28        | -0.10 |
| lv_au_ind   | -0.21 | 0.21        | -0.10       | 0.26  | 0.18  | 0.28         | -0.41 | -0.18        | 0.31  |
| lv-Vys_jn   | 0.10  | 0.05        | 0.00        | -0.26 | -0.28 | <b>-0.44</b> | -0.10 | -0.18        | 0.10  |
| lv-Vys_jl   | -0.41 | -0.21       | -0.31       | 0.05  | -0.33 | 0.03         | -0.26 | <b>-0.44</b> | -0.21 |
| lv-Vys_aug  | -0.10 | 0.26        | 0.00        | 0.10  | -0.08 | 0.08         | -0.36 | -0.28        | 0.10  |
| Hum_may     | 0.15  | 0.10        | 0.05        | -0.10 | 0.03  | -0.08        | 0.15  | -0.13        | -0.21 |
| Hum_jn      | 0.26  | 0.05        | 0.10        | -0.36 | -0.28 | <b>-0.44</b> | 0.05  | -0.03        | 0.05  |
| Hum_jl      | -0.33 | -0.18       | -0.13       | -0.08 | -0.15 | -0.21        | -0.23 | <b>-0.51</b> | -0.28 |
| Hum_aug     | -0.35 | -0.14       | -0.30       | -0.01 | -0.30 | 0.12         | -0.19 | <b>-0.50</b> | -0.12 |
| T_may       | -0.15 | 0.00        | 0.10        | 0.00  | -0.08 | -0.08        | -0.15 | -0.08        | -0.21 |
| T_jn        | 0.00  | 0.21        | -0.05       | 0.21  | 0.03  | 0.03         | 0.00  | -0.08        | 0.26  |
| T_jl        | 0.33  | 0.18        | <b>0.44</b> | -0.38 | -0.05 | <b>-0.46</b> | 0.13  | 0.05         | -0.08 |
| T_aug       | 0.21  | 0.15        | 0.31        | 0.05  | 0.28  | -0.08        | 0.00  | 0.13         | -0.15 |
| Prec_jn     | 0.13  | 0.18        | 0.08        | -0.28 | -0.26 | <b>-0.56</b> | -0.13 | -0.21        | 0.18  |
| Prec_jl     | -0.36 | -0.10       | -0.26       | 0.00  | -0.23 | 0.13         | -0.31 | -0.33        | -0.21 |
| Prec_aug    | 0.05  | <b>0.51</b> | 0.15        | 0.05  | 0.13  | 0.08         | -0.31 | -0.18        | 0.21  |
| Wind_my     | 0.13  | 0.08        | 0.18        | -0.03 | -0.10 | 0.00         | -0.08 | 0.00         | 0.03  |
| Wind_jn     | -0.04 | 0.09        | 0.06        | -0.22 | -0.19 | 0.09         | -0.25 | 0.09         | -0.17 |
| Wind_jl     | -0.22 | -0.17       | -0.12       | -0.06 | 0.06  | 0.32         | -0.09 | 0.22         | -0.22 |
| Wind_aug    | 0.32  | 0.17        | 0.27        | -0.30 | -0.12 | 0.04         | 0.04  | 0.09         | -0.14 |

Table S9. A Spearman rho correlation matrix for Siberian pine #2.

| Weather par | orgCa* | alcCa | hclCa                   | orgSr        | alcSr       | hclSr | orgK  | alcK  | hclK  | orgAl | alcAl | hclAl |
|-------------|--------|-------|-------------------------|--------------|-------------|-------|-------|-------|-------|-------|-------|-------|
| lv_jn_ind** | -0.01  | 0.06  | 0.20                    | 0.41         | <b>0.76</b> | 0.13  | -0.07 | -0.06 | 0.04  | -0.06 | -0.06 | 0.29  |
| lv_jl_ind   | -0.21  | -0.22 | <b>0.73<sup>†</sup></b> | 0.02         | 0.34        | 0.39  | -0.41 | 0.12  | 0.24  | -0.17 | 0.34  | 0.21  |
| lv_au_ind   | -0.29  | -0.22 | -0.10                   | <b>-0.59</b> | -0.34       | 0.10  | -0.12 | 0.43  | -0.28 | -0.45 | 0.08  | 0.02  |
| lv-Vys_jn   | 0.10   | 0.15  | 0.15                    | 0.38         | <b>0.66</b> | 0.12  | -0.13 | -0.20 | 0.02  | 0.09  | -0.11 | 0.32  |
| lv-Vys_jl   | -0.23  | -0.26 | 0.57                    | -0.13        | 0.42        | 0.24  | -0.37 | 0.17  | 0.23  | -0.23 | 0.37  | 0.19  |
| lv-Vys_aug  | -0.27  | -0.27 | 0.13                    | -0.38        | -0.17       | -0.01 | -0.36 | 0.25  | 0.03  | -0.42 | 0.12  | 0.33  |
| Hum_may     | -0.41  | -0.48 | 0.06                    | 0.25         | 0.31        | -0.41 | 0.16  | 0.24  | 0.17  | -0.25 | -0.26 | 0.10  |
| Hum_jn      | 0.45   | 0.48  | 0.02                    | 0.36         | 0.37        | 0.14  | -0.28 | -0.48 | 0.02  | 0.22  | -0.07 | 0.29  |
| Hum_jl      | -0.25  | -0.31 | 0.34                    | -0.27        | 0.34        | -0.08 | -0.41 | 0.26  | 0.20  | -0.53 | 0.23  | 0.20  |
| Hum_aug     | -0.36  | -0.42 | 0.12                    | -0.39        | 0.20        | -0.39 | -0.46 | 0.26  | 0.23  | -0.39 | 0.13  | 0.57  |
| T_may       | 0.46   | 0.43  | -0.01                   | -0.50        | -0.43       | 0.38  | -0.43 | -0.36 | -0.18 | 0.14  | 0.35  | -0.15 |
| T_jn        | 0.14   | 0.15  | 0.03                    | -0.20        | -0.34       | 0.09  | -0.45 | -0.03 | -0.10 | -0.10 | -0.10 | 0.21  |
| T_jl        | 0.06   | -0.09 | -0.03                   | 0.43         | 0.14        | -0.30 | 0.12  | -0.21 | 0.24  | 0.31  | -0.50 | 0.15  |
| T_aug       | -0.15  | -0.13 | -0.28                   | 0.01         | -0.10       | 0.10  | 0.57  | 0.17  | -0.27 | -0.16 | -0.06 | -0.45 |
| Prec_jn     | 0.08   | 0.08  | 0.25                    | 0.41         | 0.56        | 0.13  | -0.18 | -0.17 | 0.09  | 0.05  | -0.19 | 0.31  |
| Prec_jl     | -0.20  | -0.22 | <b>0.70</b>             | 0.03         | 0.24        | 0.35  | -0.24 | 0.16  | 0.41  | -0.16 | 0.45  | 0.10  |
| Prec_aug    | -0.15  | -0.13 | -0.19                   | -0.40        | -0.38       | -0.03 | -0.08 | 0.25  | -0.17 | -0.38 | -0.02 | 0.08  |
| Wind_my     | -0.06  | -0.09 | -0.08                   | 0.15         | 0.14        | -0.04 | 0.42  | 0.10  | 0.28  | 0.28  | -0.12 | 0.01  |
| Wind_jn     | 0.09   | 0.12  | 0.07                    | 0.14         | 0.02        | 0.16  | 0.16  | -0.18 | 0.20  | 0.26  | 0.27  | 0.08  |
| Wind_jl     | 0.15   | 0.19  | 0.15                    | -0.13        | -0.36       | 0.25  | 0.02  | -0.18 | -0.01 | 0.07  | 0.57  | -0.36 |
| Wind_aug    | -0.13  | -0.14 | 0.00                    | 0.18         | 0.04        | -0.16 | 0.38  | -0.07 | 0.11  | -0.04 | 0.32  | -0.31 |

\* as in Table S1

\*\* as in Table S1

<sup>†</sup> as in Table S1

Table S9. A Spearman rho correlation matrix for Siberian pine #2 (continued 1).

| Weather par | orgP  | alcP         | hclP  | orgS  | alcS         | hclS  | orgTi       | alcTi        | hclTi | orgMn | alcMn | hclMn       |
|-------------|-------|--------------|-------|-------|--------------|-------|-------------|--------------|-------|-------|-------|-------------|
| lv_jn_ind   | -0.33 | 0.11         | 0.31  | -0.38 | <b>-0.68</b> | 0.28  | 0.57        | -0.30        | 0.43  | 0.01  | 0.15  | -0.08       |
| lv_jl_ind   | -0.30 | 0.56         | 0.45  | -0.08 | <b>-0.64</b> | 0.01  | 0.41        | -0.52        | 0.46  | 0.27  | 0.10  | -0.31       |
| lv_au_ind   | -0.01 | -0.11        | -0.41 | 0.10  | 0.38         | 0.02  | -0.15       | 0.09         | 0.24  | -0.15 | -0.04 | -0.10       |
| lv-Vys_jn   | -0.24 | 0.04         | 0.36  | -0.24 | <b>-0.60</b> | 0.28  | <b>0.64</b> | -0.24        | 0.42  | 0.00  | 0.11  | -0.22       |
| lv-Vys_jl   | -0.35 | <b>0.66</b>  | 0.27  | -0.13 | <b>-0.63</b> | 0.00  | 0.36        | <b>-0.59</b> | 0.41  | 0.27  | 0.13  | -0.30       |
| lv-Vys_aug  | -0.18 | 0.17         | -0.18 | 0.17  | 0.22         | -0.04 | -0.08       | -0.12        | 0.19  | -0.03 | -0.06 | -0.16       |
| Hum_may     | -0.24 | 0.23         | 0.03  | 0.00  | 0.00         | -0.17 | -0.27       | -0.19        | -0.24 | 0.08  | 0.00  | 0.18        |
| Hum_jn      | 0.06  | -0.16        | 0.20  | -0.18 | -0.41        | 0.25  | 0.42        | 0.11         | 0.00  | -0.16 | -0.06 | -0.06       |
| Hum_jl      | -0.37 | <b>0.59</b>  | -0.01 | 0.04  | -0.52        | 0.33  | 0.29        | -0.36        | 0.27  | -0.10 | -0.15 | -0.23       |
| Hum_aug     | -0.40 | <b>0.76</b>  | -0.19 | -0.07 | -0.16        | -0.04 | 0.07        | <b>-0.65</b> | 0.24  | 0.38  | 0.30  | -0.39       |
| T_may       | 0.36  | -0.23        | -0.13 | 0.41  | 0.26         | -0.02 | -0.01       | 0.40         | -0.15 | -0.37 | -0.48 | -0.17       |
| T_jn        | 0.37  | -0.17        | -0.24 | 0.11  | 0.16         | -0.03 | -0.11       | 0.33         | -0.33 | -0.14 | -0.10 | -0.12       |
| T_jl        | 0.01  | -0.17        | 0.29  | 0.50  | 0.10         | -0.12 | 0.23        | 0.10         | -0.20 | -0.18 | -0.29 | -0.10       |
| T_aug       | -0.01 | <b>-0.61</b> | -0.17 | 0.17  | <b>0.66</b>  | -0.28 | -0.52       | 0.45         | -0.20 | -0.45 | -0.41 | <b>0.59</b> |
| Prec_jn     | -0.21 | -0.01        | 0.43  | -0.01 | -0.56        | 0.32  | <b>0.68</b> | -0.13        | 0.38  | -0.15 | -0.08 | -0.24       |
| Prec_jl     | -0.38 | <b>0.61</b>  | 0.40  | -0.08 | <b>-0.59</b> | 0.01  | 0.36        | -0.54        | 0.46  | 0.27  | 0.11  | -0.14       |
| Prec_aug    | -0.03 | -0.27        | -0.36 | 0.26  | 0.51         | 0.09  | -0.17       | 0.27         | 0.11  | -0.34 | -0.24 | 0.03        |
| Wind_my     | -0.20 | -0.02        | 0.07  | 0.13  | 0.08         | -0.29 | 0.35        | -0.22        | 0.26  | 0.13  | 0.14  | 0.02        |
| Wind_jn     | -0.30 | 0.05         | 0.28  | -0.05 | 0.03         | -0.08 | 0.20        | -0.27        | 0.45  | 0.20  | 0.15  | 0.03        |
| Wind_jl     | -0.06 | 0.13         | 0.22  | -0.08 | -0.03        | 0.25  | -0.21       | -0.03        | 0.22  | 0.10  | -0.02 | 0.10        |
| Wind_aug    | -0.41 | 0.20         | 0.29  | -0.07 | 0.02         | 0.20  | -0.30       | -0.20        | 0.21  | 0.06  | -0.06 | 0.31        |

Table S9. A Spearman rho correlation matrix for Siberian pine #2 (continued 2).

| Weather par | orgFe | alcFe | hclFe        | orgCu       | alcCu | hclCu        | orgZn | alcZn | hclZn |
|-------------|-------|-------|--------------|-------------|-------|--------------|-------|-------|-------|
| lv_jn_ind   | 0.39  | 0.20  | -0.45        | -0.13       | 0.16  | 0.18         | -0.27 | 0.15  | 0.01  |
| lv_jl_ind   | 0.57  | 0.01  | -0.57        | 0.06        | 0.29  | 0.43         | -0.39 | 0.03  | 0.22  |
| lv_au_ind   | 0.01  | -0.31 | 0.32         | <b>0.64</b> | 0.41  | -0.12        | -0.43 | 0.02  | 0.09  |
| lv-Vys_jn   | 0.34  | 0.14  | -0.42        | -0.17       | 0.14  | 0.24         | -0.23 | 0.25  | 0.10  |
| lv-Vys_jl   | 0.45  | -0.05 | <b>-0.66</b> | 0.18        | 0.31  | 0.42         | -0.30 | -0.02 | 0.15  |
| lv-Vys_aug  | 0.19  | -0.26 | 0.09         | 0.38        | 0.16  | 0.07         | -0.27 | 0.01  | 0.04  |
| Hum_may     | 0.16  | -0.17 | -0.10        | -0.24       | -0.15 | -0.34        | 0.37  | -0.36 | -0.23 |
| Hum_jn      | 0.14  | 0.50  | -0.08        | -0.29       | -0.26 | 0.29         | 0.00  | 0.39  | 0.01  |
| Hum_jl      | 0.35  | -0.03 | <b>-0.59</b> | 0.27        | 0.30  | 0.38         | -0.25 | -0.05 | 0.24  |
| Hum_aug     | 0.13  | -0.35 | -0.50        | 0.52        | 0.07  | 0.28         | -0.07 | 0.03  | -0.22 |
| T_may       | -0.13 | 0.13  | 0.27         | 0.04        | 0.01  | 0.32         | -0.08 | 0.28  | 0.45  |
| T_jn        | 0.07  | 0.34  | 0.46         | 0.20        | -0.24 | 0.03         | 0.04  | 0.30  | -0.08 |
| T_jl        | 0.17  | -0.13 | 0.00         | -0.57       | -0.09 | -0.13        | 0.44  | -0.14 | 0.25  |
| T_aug       | -0.08 | -0.22 | <b>0.60</b>  | -0.28       | 0.13  | <b>-0.62</b> | 0.09  | -0.45 | 0.09  |
| Prec_jn     | 0.45  | 0.13  | -0.36        | -0.26       | 0.19  | 0.24         | -0.23 | 0.20  | 0.29  |
| Prec_jl     | 0.47  | 0.04  | <b>-0.59</b> | 0.07        | 0.29  | 0.45         | -0.38 | -0.13 | 0.18  |
| Prec_aug    | -0.02 | -0.24 | 0.43         | 0.37        | 0.23  | -0.14        | -0.29 | -0.01 | 0.14  |
| Wind_my     | 0.08  | -0.21 | -0.11        | -0.03       | 0.33  | -0.06        | 0.06  | -0.32 | 0.07  |
| Wind_jn     | -0.04 | -0.22 | -0.22        | -0.11       | 0.12  | 0.20         | -0.24 | -0.06 | 0.06  |
| Wind_jl     | -0.31 | -0.08 | -0.22        | -0.05       | -0.03 | 0.29         | -0.33 | 0.04  | 0.16  |
| Wind_aug    | -0.27 | -0.38 | -0.41        | -0.36       | -0.04 | -0.01        | -0.07 | -0.32 | 0.07  |

Table S10. A Kendall tau correlation matrix for Siberian pine #2.

| Weather par        | orgCa* | alcCa | hclCa                   | orgSr | alcSr       | hclSr | orgK  | alcK  | hclK  | orgAl | alcAl | hclAl |
|--------------------|--------|-------|-------------------------|-------|-------------|-------|-------|-------|-------|-------|-------|-------|
| <b>lv_jn_ind**</b> | 0.03   | 0.09  | 0.15                    | 0.33  | <b>0.58</b> | 0.18  | -0.03 | -0.03 | 0.06  | -0.09 | -0.03 | 0.15  |
| <b>lv_jl_ind</b>   | -0.12  | -0.12 | <b>0.48<sup>†</sup></b> | 0.00  | 0.24        | 0.27  | -0.30 | 0.06  | 0.15  | -0.12 | 0.24  | 0.12  |
| <b>lv_au_ind</b>   | -0.18  | -0.12 | -0.06                   | -0.42 | -0.24       | 0.15  | -0.06 | 0.30  | -0.21 | -0.36 | 0.00  | 0.06  |
| <b>lv-Vys_jn</b>   | 0.09   | 0.15  | 0.09                    | 0.33  | <b>0.52</b> | 0.18  | -0.15 | -0.15 | 0.00  | 0.03  | -0.03 | 0.15  |
| <b>lv-Vys_jl</b>   | -0.15  | -0.15 | 0.39                    | -0.09 | 0.33        | 0.18  | -0.27 | 0.09  | 0.18  | -0.15 | 0.27  | 0.15  |
| <b>lv-Vys_aug</b>  | -0.18  | -0.18 | 0.12                    | -0.24 | -0.12       | 0.03  | -0.30 | 0.18  | 0.03  | -0.36 | 0.06  | 0.24  |
| <b>Hum_may</b>     | -0.24  | -0.36 | 0.00                    | 0.12  | 0.24        | -0.27 | 0.06  | 0.18  | 0.09  | -0.18 | -0.12 | 0.12  |
| <b>Hum_jn</b>      | 0.27   | 0.33  | 0.03                    | 0.33  | 0.27        | 0.18  | -0.21 | -0.27 | 0.06  | 0.15  | -0.03 | 0.15  |
| <b>Hum_jl</b>      | -0.15  | -0.21 | 0.27                    | -0.15 | 0.27        | 0.00  | -0.33 | 0.21  | 0.18  | -0.39 | 0.15  | 0.15  |
| <b>Hum_aug</b>     | -0.23  | -0.29 | 0.17                    | -0.26 | 0.08        | -0.20 | -0.32 | 0.17  | 0.14  | -0.26 | 0.08  | 0.35  |
| <b>T_may</b>       | 0.39   | 0.33  | 0.03                    | -0.39 | -0.27       | 0.24  | -0.27 | -0.27 | -0.12 | 0.09  | 0.27  | -0.15 |
| <b>T_jn</b>        | 0.21   | 0.15  | 0.09                    | -0.21 | -0.21       | 0.18  | -0.33 | -0.03 | -0.06 | -0.09 | -0.09 | 0.15  |
| <b>T_jl</b>        | 0.06   | -0.06 | -0.06                   | 0.30  | 0.12        | -0.21 | 0.12  | -0.12 | 0.15  | 0.18  | -0.36 | 0.12  |
| <b>T_aug</b>       | -0.18  | -0.18 | -0.18                   | 0.00  | -0.12       | 0.09  | 0.36  | 0.18  | -0.15 | -0.12 | -0.06 | -0.30 |
| <b>Prec_jn</b>     | 0.03   | -0.03 | 0.15                    | 0.33  | <b>0.45</b> | 0.18  | -0.15 | -0.03 | 0.06  | -0.03 | -0.15 | 0.15  |
| <b>Prec_jl</b>     | -0.12  | -0.12 | <b>0.48</b>             | 0.00  | 0.18        | 0.27  | -0.18 | 0.12  | 0.27  | -0.12 | 0.30  | 0.06  |
| <b>Prec_aug</b>    | -0.09  | -0.03 | -0.15                   | -0.33 | -0.21       | 0.00  | -0.09 | 0.15  | -0.12 | -0.33 | -0.03 | 0.09  |
| <b>Wind_my</b>     | -0.03  | -0.09 | -0.06                   | 0.18  | 0.09        | -0.03 | 0.37  | 0.03  | 0.22  | 0.22  | -0.09 | 0.00  |
| <b>Wind_jn</b>     | 0.08   | 0.14  | 0.05                    | 0.11  | 0.05        | 0.05  | 0.17  | -0.17 | 0.14  | 0.17  | 0.20  | 0.05  |
| <b>Wind_jl</b>     | 0.06   | 0.06  | 0.12                    | 0.00  | -0.30       | 0.21  | 0.00  | -0.12 | 0.03  | 0.06  | 0.42  | -0.24 |
| <b>Wind_aug</b>    | -0.11  | -0.08 | -0.05                   | 0.11  | 0.02        | -0.11 | 0.23  | -0.08 | 0.05  | 0.02  | 0.26  | -0.23 |

\* as in Table S1

\*\* as in Table S1

<sup>†</sup> as in Table S1

Table S10. A Kendall tau correlation matrix for Siberian pine #2 (continued 1).

| Weather par | orgP  | alcP        | hclP  | orgS  | alcS         | hclS  | orgTi       | alcTi        | hclTi | orgMn | alcMn | hclMn       |
|-------------|-------|-------------|-------|-------|--------------|-------|-------------|--------------|-------|-------|-------|-------------|
| lv_jn_ind   | -0.15 | 0.12        | 0.21  | -0.21 | <b>-0.55</b> | 0.26  | 0.41        | -0.18        | 0.33  | 0.00  | 0.09  | -0.06       |
| lv_jl_ind   | -0.24 | 0.39        | 0.30  | -0.06 | <b>-0.45</b> | 0.00  | 0.38        | -0.39        | 0.30  | 0.21  | 0.12  | -0.27       |
| lv_au_ind   | 0.00  | -0.03       | -0.30 | 0.12  | 0.27         | 0.07  | -0.11       | 0.03         | 0.18  | -0.09 | 0.00  | -0.09       |
| lv-Vys_jn   | -0.15 | 0.06        | 0.21  | -0.15 | <b>-0.48</b> | 0.26  | <b>0.53</b> | -0.18        | 0.33  | 0.00  | 0.09  | -0.18       |
| lv-Vys_jl   | -0.27 | <b>0.48</b> | 0.21  | -0.09 | -0.42        | -0.03 | 0.29        | <b>-0.48</b> | 0.27  | 0.18  | 0.09  | -0.24       |
| lv-Vys_aug  | -0.12 | 0.15        | -0.12 | 0.12  | 0.09         | -0.03 | -0.05       | -0.09        | 0.12  | 0.03  | -0.06 | -0.15       |
| Hum_may     | -0.18 | 0.15        | 0.00  | -0.06 | 0.03         | -0.16 | -0.17       | -0.15        | -0.12 | 0.09  | 0.00  | 0.15        |
| Hum_jn      | 0.09  | -0.12       | 0.15  | -0.09 | -0.30        | 0.23  | 0.26        | 0.12         | 0.03  | -0.12 | -0.03 | 0.00        |
| Hum_jl      | -0.21 | <b>0.48</b> | 0.03  | 0.03  | -0.36        | 0.23  | 0.17        | -0.30        | 0.15  | 0.00  | -0.09 | -0.18       |
| Hum_aug     | -0.32 | <b>0.56</b> | -0.08 | -0.02 | -0.26        | 0.02  | 0.06        | <b>-0.44</b> | 0.17  | 0.26  | 0.17  | -0.32       |
| T_may       | 0.27  | -0.18       | -0.09 | 0.27  | 0.18         | -0.03 | 0.02        | 0.30         | -0.15 | -0.24 | -0.33 | -0.12       |
| T_jn        | 0.27  | -0.12       | -0.15 | 0.03  | 0.12         | -0.03 | -0.02       | 0.24         | -0.21 | -0.12 | -0.09 | -0.12       |
| T_jl        | 0.06  | -0.15       | 0.18  | 0.36  | 0.03         | -0.10 | 0.17        | 0.09         | -0.18 | -0.09 | -0.18 | -0.09       |
| T_aug       | 0.00  | -0.39       | -0.12 | 0.12  | <b>0.45</b>  | -0.23 | -0.38       | 0.33         | -0.18 | -0.33 | -0.30 | <b>0.45</b> |
| Prec_jn     | -0.09 | 0.00        | 0.27  | -0.03 | -0.42        | 0.30  | <b>0.60</b> | -0.12        | 0.27  | -0.12 | -0.09 | -0.18       |
| Prec_jl     | -0.30 | <b>0.45</b> | 0.30  | -0.06 | <b>-0.45</b> | 0.03  | 0.29        | <b>-0.45</b> | 0.30  | 0.21  | 0.18  | -0.15       |
| Prec_aug    | -0.03 | -0.18       | -0.33 | 0.21  | 0.36         | 0.10  | -0.08       | 0.12         | 0.09  | -0.24 | -0.09 | 0.00        |
| Wind_my     | -0.15 | -0.03       | 0.03  | 0.09  | 0.09         | -0.23 | 0.23        | -0.15        | 0.22  | 0.09  | 0.15  | 0.06        |
| Wind_jn     | -0.17 | 0.02        | 0.23  | -0.08 | 0.05         | -0.08 | 0.03        | -0.20        | 0.32  | 0.14  | 0.11  | 0.05        |
| Wind_jl     | -0.06 | 0.09        | 0.18  | -0.06 | -0.03        | 0.16  | -0.14       | -0.03        | 0.18  | 0.09  | 0.00  | 0.09        |
| Wind_aug    | -0.41 | 0.17        | 0.14  | -0.05 | -0.05        | 0.20  | -0.18       | -0.17        | 0.17  | 0.05  | -0.02 | 0.20        |

Table S10. A Kendall tau correlation matrix for Siberian pine #2 (continued 2).

| Weather par | orgFe       | alcFe       | hclFe        | orgCu       | alcCu | hclCu | orgZn | alcZn | hclZn |
|-------------|-------------|-------------|--------------|-------------|-------|-------|-------|-------|-------|
| lv_jn_ind   | 0.24        | 0.27        | -0.39        | -0.09       | 0.09  | 0.06  | -0.24 | 0.09  | 0.00  |
| lv_jl_ind   | <b>0.45</b> | 0.00        | -0.42        | 0.06        | 0.18  | 0.27  | -0.27 | 0.00  | 0.09  |
| lv_au_ind   | 0.03        | -0.24       | 0.24         | <b>0.48</b> | 0.30  | -0.09 | -0.33 | 0.00  | 0.09  |
| lv-Vys_jn   | 0.18        | 0.21        | -0.33        | -0.15       | 0.09  | 0.12  | -0.18 | 0.21  | 0.06  |
| lv-Vys_jl   | 0.42        | -0.03       | <b>-0.45</b> | 0.15        | 0.21  | 0.30  | -0.24 | -0.03 | 0.12  |
| lv-Vys_aug  | 0.15        | -0.18       | 0.06         | 0.24        | 0.12  | 0.09  | -0.21 | 0.06  | 0.03  |
| Hum_may     | 0.09        | -0.12       | -0.12        | -0.12       | -0.06 | -0.21 | 0.27  | -0.24 | -0.21 |
| Hum_jn      | 0.12        | <b>0.45</b> | -0.09        | -0.21       | -0.15 | 0.18  | 0.00  | 0.27  | 0.00  |
| Hum_jl      | 0.30        | -0.03       | -0.39        | 0.21        | 0.21  | 0.30  | -0.18 | -0.03 | 0.18  |
| Hum_aug     | 0.08        | -0.23       | -0.35        | 0.41        | 0.05  | 0.20  | -0.14 | -0.02 | -0.17 |
| T_may       | -0.06       | 0.09        | 0.15         | -0.03       | 0.03  | 0.24  | -0.12 | 0.21  | 0.24  |
| T_jn        | 0.06        | 0.33        | 0.33         | 0.15        | -0.15 | 0.06  | 0.00  | 0.21  | -0.06 |
| T_jl        | 0.15        | -0.06       | 0.00         | -0.42       | -0.12 | -0.09 | 0.33  | -0.12 | 0.15  |
| T_aug       | -0.09       | -0.18       | <b>0.48</b>  | -0.18       | 0.12  | -0.39 | 0.09  | -0.30 | 0.09  |
| Prec_jn     | 0.30        | 0.21        | -0.21        | -0.21       | 0.15  | 0.12  | -0.18 | 0.09  | 0.24  |
| Prec_jl     | 0.39        | 0.06        | -0.42        | 0.06        | 0.18  | 0.27  | -0.27 | -0.06 | 0.03  |
| Prec_aug    | -0.06       | -0.15       | 0.27         | 0.27        | 0.15  | -0.12 | -0.18 | 0.09  | 0.06  |
| Wind_my     | 0.03        | -0.18       | -0.03        | -0.03       | 0.28  | -0.09 | 0.00  | -0.28 | 0.06  |
| Wind_jn     | 0.02        | -0.17       | -0.17        | -0.11       | 0.08  | 0.11  | -0.17 | -0.05 | -0.02 |
| Wind_jl     | -0.21       | -0.06       | -0.18        | -0.06       | 0.00  | 0.21  | -0.21 | 0.06  | 0.09  |
| Wind_aug    | -0.20       | -0.29       | -0.26        | -0.26       | -0.02 | -0.08 | -0.08 | -0.23 | 0.05  |

Table S11. A Spearman rho correlation matrix for Siberian pine #3.

| Weather par | orgCa*                  | alcCa       | hclCa | orgSr        | alcSr | hclSr       | orgK  | alcK         | hclK  | orgAl       | alcAl | hclAl |
|-------------|-------------------------|-------------|-------|--------------|-------|-------------|-------|--------------|-------|-------------|-------|-------|
| lv_jn_ind** | -0.35                   | -0.29       | -0.15 | 0.17         | 0.44  | -0.15       | 0.40  | -0.51        | 0.25  | -0.15       | -0.34 | -0.01 |
| lv_jl_ind   | -0.25                   | 0.02        | -0.22 | 0.44         | 0.04  | -0.32       | -0.26 | <b>-0.69</b> | -0.11 | -0.07       | 0.34  | -0.11 |
| lv_au_ind   | <b>0.71<sup>†</sup></b> | 0.37        | 0.45  | -0.07        | -0.24 | -0.21       | -0.21 | 0.37         | -0.18 | 0.50        | 0.29  | 0.15  |
| lv-Vys_jn   | -0.18                   | -0.15       | -0.05 | 0.29         | 0.22  | -0.30       | 0.52  | -0.34        | 0.22  | -0.07       | -0.23 | 0.15  |
| lv-Vys_jl   | -0.15                   | 0.04        | -0.06 | 0.42         | 0.17  | -0.28       | -0.19 | <b>-0.76</b> | -0.09 | -0.03       | 0.16  | -0.28 |
| lv-Vys_aug  | 0.40                    | 0.15        | 0.31  | -0.05        | -0.41 | -0.09       | -0.27 | 0.48         | -0.26 | 0.34        | 0.20  | 0.19  |
| Hum_may     | 0.13                    | -0.02       | -0.35 | -0.29        | -0.02 | -0.24       | -0.06 | 0.32         | 0.60  | 0.00        | 0.09  | -0.16 |
| Hum_jn      | -0.02                   | 0.15        | -0.10 | 0.30         | 0.03  | -0.24       | 0.52  | -0.10        | -0.04 | 0.13        | -0.20 | -0.04 |
| Hum_jl      | -0.10                   | -0.01       | 0.18  | <b>0.64</b>  | 0.06  | -0.41       | 0.13  | <b>-0.86</b> | 0.04  | -0.08       | -0.09 | -0.32 |
| Hum_aug     | 0.14                    | -0.10       | -0.32 | 0.27         | -0.30 | -0.60       | -0.54 | 0.19         | 0.33  | -0.15       | 0.60  | 0.15  |
| T_may       | 0.15                    | 0.43        | 0.17  | 0.29         | -0.07 | 0.15        | 0.60  | 0.01         | -0.38 | 0.13        | -0.36 | -0.25 |
| T_jn        | -0.21                   | -0.01       | 0.05  | 0.29         | -0.59 | -0.32       | 0.09  | -0.08        | -0.01 | 0.00        | 0.17  | 0.13  |
| T_jl        | 0.21                    | -0.04       | 0.05  | -0.30        | 0.04  | 0.37        | 0.15  | <b>0.71</b>  | -0.02 | -0.03       | -0.32 | 0.13  |
| T_aug       | 0.57                    | <b>0.79</b> | 0.07  | <b>-0.63</b> | 0.18  | 0.08        | 0.28  | 0.15         | -0.11 | <b>0.82</b> | 0.25  | 0.08  |
| Prec_jn     | -0.21                   | -0.20       | 0.06  | 0.44         | 0.08  | -0.33       | 0.45  | -0.37        | 0.10  | -0.10       | -0.24 | 0.14  |
| Prec_jl     | -0.16                   | -0.07       | -0.05 | 0.50         | 0.13  | -0.12       | -0.37 | -0.59        | -0.26 | -0.17       | 0.07  | -0.35 |
| Prec_aug    | 0.45                    | 0.13        | 0.33  | -0.31        | -0.18 | 0.12        | -0.19 | 0.59         | -0.22 | 0.37        | 0.05  | 0.23  |
| Wind_my     | 0.32                    | 0.08        | 0.44  | -0.11        | -0.06 | 0.20        | 0.15  | 0.41         | -0.16 | 0.09        | -0.23 | -0.04 |
| Wind_jn     | 0.28                    | 0.10        | -0.05 | 0.16         | 0.31  | 0.01        | 0.00  | 0.15         | -0.13 | -0.05       | 0.02  | 0.11  |
| Wind_jl     | -0.14                   | 0.00        | -0.39 | -0.09        | 0.48  | 0.56        | -0.26 | 0.11         | -0.43 | -0.16       | -0.15 | -0.16 |
| Wind_aug    | -0.11                   | -0.33       | -0.17 | -0.10        | 0.40  | <b>0.69</b> | -0.37 | 0.37         | -0.30 | -0.44       | -0.33 | -0.06 |

\* as in Table S1

\*\* as in Table S1

<sup>†</sup> as in Table S1

Table S11. A Spearman rho correlation matrix for Siberian pine #3 (continued 1).

| Weather par | orgP        | alcP         | hclP         | orgS  | alcS  | hclS         | orgTi        | alcTi        | hclTi | orgMn       | alcMn       | hclMn       |
|-------------|-------------|--------------|--------------|-------|-------|--------------|--------------|--------------|-------|-------------|-------------|-------------|
| lv_jn_ind   | 0.47        | 0.17         | -0.60        | -0.35 | -0.59 | 0.38         | 0.46         | 0.13         | -0.02 | -0.18       | -0.24       | 0.32        |
| lv_jl_ind   | -0.23       | 0.03         | 0.06         | 0.15  | 0.20  | -0.27        | -0.47        | 0.28         | -0.21 | 0.54        | <b>0.67</b> | <b>0.65</b> |
| lv_au_ind   | -0.31       | -0.42        | -0.08        | 0.58  | -0.19 | -0.56        | 0.03         | -0.17        | 0.13  | 0.31        | -0.06       | -0.51       |
| lv-Vys_jn   | 0.49        | 0.13         | -0.57        | -0.13 | -0.57 | 0.20         | 0.46         | -0.03        | -0.02 | -0.25       | -0.27       | 0.34        |
| lv-Vys_jl   | -0.15       | -0.02        | -0.09        | 0.18  | 0.10  | -0.12        | -0.26        | 0.39         | -0.10 | 0.59        | <b>0.65</b> | 0.49        |
| lv-Vys_aug  | -0.21       | -0.15        | -0.10        | 0.41  | -0.13 | -0.50        | 0.02         | -0.18        | 0.15  | 0.15        | -0.13       | -0.35       |
| Hum_may     | 0.15        | -0.03        | 0.34         | -0.08 | -0.30 | -0.05        | 0.38         | <b>-0.71</b> | 0.25  | 0.02        | -0.22       | -0.40       |
| Hum_jn      | <b>0.62</b> | -0.14        | -0.48        | 0.07  | -0.49 | 0.15         | 0.24         | -0.15        | -0.16 | 0.00        | -0.15       | 0.26        |
| Hum_jl      | 0.09        | 0.25         | -0.35        | 0.43  | 0.04  | 0.00         | 0.27         | 0.46         | 0.29  | 0.43        | 0.54        | 0.50        |
| Hum_aug     | -0.48       | 0.03         | 0.52         | 0.30  | -0.22 | <b>-0.80</b> | -0.16        | <b>-0.67</b> | 0.17  | 0.35        | 0.35        | 0.11        |
| T_may       | 0.51        | -0.22        | -0.21        | 0.31  | 0.12  | 0.35         | -0.02        | 0.17         | -0.14 | 0.02        | 0.10        | 0.15        |
| T_jn        | 0.15        | 0.42         | 0.00         | 0.28  | 0.43  | -0.20        | 0.08         | 0.00         | 0.15  | -0.09       | 0.09        | 0.37        |
| T_jl        | 0.14        | -0.12        | -0.01        | -0.15 | -0.37 | 0.16         | 0.25         | -0.34        | 0.13  | -0.40       | -0.52       | -0.50       |
| T_aug       | 0.20        | <b>-0.87</b> | -0.05        | 0.07  | 0.02  | 0.02         | -0.30        | -0.10        | -0.55 | 0.17        | -0.33       | -0.50       |
| Prec_jn     | 0.44        | 0.25         | <b>-0.64</b> | 0.00  | -0.48 | 0.13         | 0.47         | 0.09         | 0.07  | -0.20       | -0.17       | 0.42        |
| Prec_jl     | -0.30       | 0.03         | -0.02        | 0.20  | 0.08  | -0.15        | -0.35        | 0.41         | -0.02 | <b>0.64</b> | <b>0.75</b> | 0.46        |
| Prec_aug    | -0.15       | -0.26        | -0.18        | 0.18  | -0.28 | -0.30        | 0.11         | -0.17        | 0.10  | -0.02       | -0.39       | -0.59       |
| Wind_my     | 0.01        | -0.11        | -0.08        | 0.09  | 0.05  | 0.17         | 0.18         | 0.04         | 0.07  | -0.23       | -0.23       | -0.43       |
| Wind_jn     | -0.20       | -0.42        | 0.01         | 0.05  | -0.50 | -0.16        | -0.25        | -0.17        | -0.21 | 0.12        | 0.09        | -0.01       |
| Wind_jl     | -0.17       | -0.44        | 0.14         | -0.40 | -0.26 | 0.18         | <b>-0.69</b> | 0.09         | -0.48 | 0.25        | 0.23        | 0.08        |
| Wind_aug    | -0.39       | -0.09        | 0.21         | -0.39 | -0.28 | 0.17         | -0.34        | 0.07         | -0.04 | -0.06       | 0.07        | -0.16       |

Table S11. A Spearman rho correlation matrix for Siberian pine #3 (continued 2).

| Weather par | orgFe       | alcFe       | hclFe | orgCu        | alcCu | hclCu | orgZn       | alcZn | hclZn |
|-------------|-------------|-------------|-------|--------------|-------|-------|-------------|-------|-------|
| lv_jn_ind   | <b>0.61</b> | <b>0.70</b> | 0.36  | -0.24        | -0.45 | 0.02  | 0.02        | 0.25  | 0.37  |
| lv_jl_ind   | 0.07        | -0.04       | 0.05  | 0.56         | -0.23 | 0.42  | -0.34       | -0.19 | -0.04 |
| lv_au_ind   | -0.09       | -0.40       | -0.40 | 0.13         | 0.26  | -0.42 | 0.32        | 0.31  | -0.45 |
| lv-Vys_jn   | <b>0.63</b> | 0.51        | 0.12  | -0.41        | -0.44 | -0.15 | 0.02        | 0.33  | 0.39  |
| lv-Vys_jl   | 0.05        | 0.02        | 0.08  | 0.55         | -0.11 | 0.39  | -0.36       | -0.22 | -0.20 |
| lv-Vys_aug  | -0.23       | -0.45       | -0.45 | 0.01         | 0.04  | -0.54 | 0.23        | 0.31  | -0.30 |
| Hum_may     | 0.01        | 0.25        | 0.45  | 0.10         | 0.52  | 0.13  | 0.29        | 0.07  | -0.05 |
| Hum_jn      | 0.40        | 0.22        | -0.10 | <b>-0.61</b> | -0.27 | -0.22 | -0.05       | 0.07  | -0.01 |
| Hum_jl      | 0.10        | 0.02        | -0.05 | 0.39         | -0.23 | 0.18  | -0.46       | 0.08  | -0.10 |
| Hum_aug     | -0.02       | -0.20       | 0.07  | 0.55         | 0.28  | -0.03 | 0.01        | 0.05  | 0.09  |
| T_may       | -0.05       | -0.24       | -0.43 | <b>-0.71</b> | -0.06 | -0.15 | -0.33       | -0.30 | -0.30 |
| T_jn        | -0.20       | -0.34       | -0.34 | 0.01         | -0.22 | -0.05 | -0.23       | 0.20  | 0.13  |
| T_jl        | 0.01        | 0.05        | -0.05 | -0.58        | 0.07  | -0.48 | 0.30        | 0.12  | 0.08  |
| T_aug       | 0.26        | 0.14        | 0.05  | -0.24        | 0.29  | 0.26  | <b>0.65</b> | 0.07  | -0.50 |
| Prec_jn     | 0.50        | 0.34        | -0.05 | -0.35        | -0.52 | -0.26 | -0.12       | 0.35  | 0.35  |
| Prec_jl     | -0.15       | -0.16       | -0.04 | 0.55         | -0.11 | 0.21  | -0.50       | -0.36 | -0.25 |
| Prec_aug    | -0.11       | -0.23       | -0.29 | -0.14        | 0.06  | -0.55 | 0.44        | 0.35  | -0.25 |
| Wind_my     | -0.25       | -0.28       | -0.34 | -0.36        | 0.33  | -0.33 | -0.06       | -0.17 | -0.23 |
| Wind_jn     | 0.31        | 0.07        | -0.04 | -0.20        | 0.03  | -0.21 | 0.05        | -0.16 | 0.01  |
| Wind_jl     | 0.05        | 0.14        | 0.18  | -0.15        | -0.12 | 0.07  | -0.04       | -0.57 | -0.12 |
| Wind_aug    | -0.13       | 0.04        | 0.13  | -0.10        | -0.06 | -0.23 | -0.06       | -0.39 | 0.11  |

Table S12. A Kendall tau correlation matrix for Siberian pine #3.

| Weather par | orgCa* | alcCa                   | hclCa | orgSr        | alcSr | hclSr       | orgK        | alcK         | hclK  | orgAl       | alcAl       | hclAl |
|-------------|--------|-------------------------|-------|--------------|-------|-------------|-------------|--------------|-------|-------------|-------------|-------|
| lv_jn_ind** | -0.24  | -0.09                   | -0.13 | 0.09         | 0.35  | -0.05       | 0.31        | -0.38        | 0.16  | -0.09       | -0.31       | -0.02 |
| lv_jl_ind   | -0.20  | -0.05                   | -0.16 | 0.27         | 0.02  | -0.31       | -0.16       | <b>-0.49</b> | -0.09 | -0.05       | 0.31        | -0.05 |
| lv_au_ind   | 0.56   | 0.20                    | 0.31  | 0.02         | -0.16 | -0.13       | -0.13       | 0.27         | -0.20 | 0.35        | 0.20        | 0.13  |
| lv-Vys_jn   | -0.09  | -0.09                   | -0.05 | 0.24         | 0.13  | -0.20       | 0.45        | -0.31        | 0.16  | -0.02       | -0.24       | 0.13  |
| lv-Vys_jl   | -0.09  | 0.05                    | -0.05 | 0.24         | 0.13  | -0.27       | -0.13       | <b>-0.53</b> | -0.05 | -0.02       | 0.13        | -0.24 |
| lv-Vys_aug  | 0.27   | 0.13                    | 0.24  | -0.05        | -0.24 | -0.13       | -0.20       | 0.35         | -0.27 | 0.20        | 0.13        | 0.13  |
| Hum_may     | 0.05   | -0.02                   | -0.27 | -0.20        | -0.02 | -0.20       | -0.05       | 0.27         | 0.45  | 0.05        | 0.05        | -0.16 |
| Hum_jn      | 0.04   | 0.11                    | -0.07 | 0.22         | 0.04  | -0.18       | 0.44        | 0.00         | 0.00  | 0.07        | -0.15       | -0.07 |
| Hum_jl      | -0.05  | 0.02                    | 0.13  | <b>0.49</b>  | 0.02  | -0.31       | 0.13        | <b>-0.71</b> | -0.02 | -0.05       | -0.05       | -0.20 |
| Hum_aug     | 0.05   | -0.09                   | -0.27 | 0.16         | -0.24 | -0.42       | -0.35       | 0.13         | 0.24  | -0.09       | <b>0.49</b> | 0.13  |
| T_may       | 0.09   | 0.31                    | 0.13  | 0.20         | -0.13 | 0.13        | 0.42        | 0.09         | -0.24 | 0.09        | -0.27       | -0.20 |
| T_jn        | -0.16  | -0.02                   | 0.02  | 0.16         | -0.45 | -0.27       | 0.09        | -0.02        | 0.02  | 0.05        | 0.13        | 0.13  |
| T_jl        | 0.16   | 0.02                    | -0.02 | -0.16        | -0.05 | 0.27        | 0.13        | <b>0.53</b>  | -0.02 | -0.05       | -0.27       | 0.09  |
| T_aug       | 0.35   | <b>0.64<sup>†</sup></b> | 0.02  | <b>-0.49</b> | 0.13  | 0.09        | 0.31        | 0.13         | -0.13 | <b>0.64</b> | 0.13        | -0.02 |
| Prec_jn     | -0.05  | -0.13                   | 0.05  | 0.35         | 0.02  | -0.24       | <b>0.49</b> | -0.35        | 0.05  | -0.05       | -0.20       | 0.09  |
| Prec_jl     | -0.09  | -0.02                   | 0.02  | 0.31         | 0.13  | -0.13       | -0.27       | -0.38        | -0.20 | -0.09       | 0.05        | -0.31 |
| Prec_aug    | 0.27   | 0.05                    | 0.24  | -0.20        | -0.09 | 0.09        | -0.20       | <b>0.49</b>  | -0.20 | 0.27        | 0.05        | 0.20  |
| Wind_my     | 0.28   | 0.06                    | 0.31  | -0.13        | 0.06  | 0.13        | 0.09        | 0.31         | -0.09 | 0.09        | -0.13       | -0.02 |
| Wind_jn     | 0.22   | 0.07                    | -0.04 | 0.11         | 0.18  | 0.00        | -0.04       | 0.11         | -0.15 | 0.00        | 0.00        | 0.07  |
| Wind_jl     | -0.13  | -0.02                   | -0.31 | -0.06        | 0.35  | <b>0.50</b> | -0.17       | 0.06         | -0.31 | -0.02       | -0.17       | -0.09 |
| Wind_aug    | -0.07  | -0.30                   | -0.15 | -0.07        | 0.34  | <b>0.56</b> | -0.22       | 0.22         | -0.26 | -0.34       | -0.26       | -0.07 |

\* as in Table S1

\*\* as in Table S1

<sup>†</sup> as in Table S1

Table S12. A Kendall tau correlation matrix for Siberian pine #3 (continued 1).

| Weather par | orgP        | alcP         | hclP  | orgS  | alcS  | hclS         | orgTi        | alcTi        | hclTi | orgMn | alcMn       | hclMn       |
|-------------|-------------|--------------|-------|-------|-------|--------------|--------------|--------------|-------|-------|-------------|-------------|
| lv_jn_ind   | 0.38        | 0.20         | -0.42 | -0.27 | -0.42 | 0.38         | 0.38         | 0.09         | -0.02 | -0.20 | -0.20       | 0.16        |
| lv_jl_ind   | -0.16       | 0.09         | 0.05  | 0.13  | 0.13  | -0.24        | -0.31        | 0.20         | -0.13 | 0.42  | <b>0.49</b> | <b>0.49</b> |
| lv_au_ind   | -0.20       | -0.24        | 0.02  | 0.38  | -0.13 | -0.42        | 0.09         | -0.13        | 0.05  | 0.24  | -0.05       | -0.35       |
| lv-Vys_jn   | 0.45        | 0.13         | -0.42 | -0.13 | -0.42 | 0.16         | 0.38         | -0.05        | -0.02 | -0.20 | -0.20       | 0.24        |
| lv-Vys_jl   | -0.13       | -0.02        | -0.05 | 0.16  | 0.09  | -0.13        | -0.20        | 0.31         | -0.02 | 0.45  | <b>0.53</b> | 0.38        |
| lv-Vys_aug  | -0.13       | -0.09        | -0.05 | 0.24  | -0.13 | -0.35        | 0.09         | -0.13        | 0.13  | 0.09  | -0.13       | -0.27       |
| Hum_may     | 0.09        | -0.02        | 0.16  | 0.02  | -0.20 | -0.05        | 0.24         | <b>-0.49</b> | 0.13  | 0.09  | -0.13       | -0.27       |
| Hum_jn      | <b>0.51</b> | -0.04        | -0.37 | 0.07  | -0.37 | 0.07         | 0.15         | -0.07        | -0.11 | -0.04 | -0.07       | 0.15        |
| Hum_jl      | 0.13        | 0.24         | -0.24 | 0.35  | 0.05  | 0.05         | 0.20         | 0.27         | 0.24  | 0.27  | 0.42        | 0.35        |
| Hum_aug     | -0.35       | -0.02        | 0.38  | 0.16  | -0.20 | <b>-0.64</b> | -0.13        | <b>-0.49</b> | 0.05  | 0.24  | 0.24        | 0.02        |
| T_may       | 0.35        | -0.20        | -0.16 | 0.20  | 0.13  | 0.27         | -0.02        | 0.13         | -0.05 | -0.02 | 0.05        | 0.13        |
| T_jn        | 0.16        | 0.35         | 0.02  | 0.16  | 0.31  | -0.20        | 0.09         | 0.02         | 0.13  | -0.05 | 0.16        | 0.16        |
| T_jl        | 0.13        | -0.13        | -0.09 | -0.09 | -0.24 | 0.13         | 0.20         | -0.31        | 0.09  | -0.31 | -0.38       | -0.31       |
| T_aug       | 0.16        | <b>-0.75</b> | 0.02  | -0.05 | 0.02  | 0.02         | -0.20        | -0.05        | -0.45 | 0.09  | -0.27       | -0.42       |
| Prec_jn     | <b>0.49</b> | 0.16         | -0.45 | -0.02 | -0.31 | 0.13         | 0.35         | 0.05         | 0.02  | -0.24 | -0.09       | 0.27        |
| Prec_jl     | -0.20       | 0.05         | 0.02  | 0.16  | 0.02  | -0.13        | -0.27        | 0.38         | -0.02 | 0.45  | <b>0.60</b> | 0.31        |
| Prec_aug    | -0.13       | -0.09        | -0.13 | 0.09  | -0.27 | -0.20        | 0.16         | -0.13        | 0.05  | 0.02  | -0.27       | -0.42       |
| Wind_my     | -0.06       | -0.09        | -0.06 | 0.06  | -0.02 | 0.13         | 0.17         | 0.02         | 0.06  | -0.17 | -0.17       | -0.43       |
| Wind_jn     | -0.18       | -0.40        | 0.00  | 0.04  | -0.40 | -0.07        | -0.15        | -0.18        | -0.18 | 0.11  | 0.04        | 0.04        |
| Wind_jl     | -0.09       | -0.31        | 0.06  | -0.31 | -0.13 | 0.13         | <b>-0.50</b> | 0.06         | -0.39 | 0.20  | 0.17        | 0.02        |
| Wind_aug    | -0.22       | -0.07        | 0.22  | -0.30 | -0.15 | 0.15         | -0.26        | 0.00         | -0.07 | -0.04 | 0.11        | -0.11       |

Table S12. A Kendall tau correlation matrix for Siberian pine #3 (continued 2).

| Weather par | orgFe | alcFe       | hclFe | orgCu        | alcCu | hclCu | orgZn | alcZn        | hclZn |
|-------------|-------|-------------|-------|--------------|-------|-------|-------|--------------|-------|
| lv_jn_ind   | 0.45  | <b>0.53</b> | 0.27  | -0.20        | -0.35 | 0.02  | 0.02  | 0.16         | 0.31  |
| lv_jl_ind   | 0.05  | -0.02       | 0.02  | 0.42         | -0.24 | 0.27  | -0.16 | -0.09        | -0.02 |
| lv_au_ind   | -0.13 | -0.35       | -0.24 | 0.16         | 0.16  | -0.27 | 0.24  | 0.24         | -0.35 |
| lv-Vys_jn   | 0.45  | 0.31        | 0.05  | -0.35        | -0.35 | -0.13 | 0.02  | 0.24         | 0.31  |
| lv-Vys_jl   | 0.02  | 0.02        | 0.05  | 0.38         | -0.05 | 0.31  | -0.20 | -0.13        | -0.13 |
| lv-Vys_aug  | -0.13 | -0.27       | -0.31 | 0.02         | 0.09  | -0.35 | 0.16  | 0.16         | -0.20 |
| Hum_may     | 0.02  | 0.16        | 0.35  | 0.09         | 0.38  | 0.09  | 0.24  | 0.02         | -0.13 |
| Hum_jn      | 0.29  | 0.15        | -0.04 | -0.44        | -0.15 | -0.15 | 0.04  | 0.00         | 0.00  |
| Hum_jl      | 0.05  | -0.02       | -0.05 | 0.27         | -0.24 | 0.13  | -0.31 | 0.05         | -0.09 |
| Hum_aug     | 0.02  | -0.13       | -0.02 | 0.38         | 0.24  | -0.05 | -0.05 | 0.02         | 0.09  |
| T_may       | -0.02 | -0.16       | -0.35 | <b>-0.53</b> | -0.02 | -0.09 | -0.24 | -0.24        | -0.16 |
| T_jn        | -0.05 | -0.27       | -0.24 | 0.02         | -0.20 | -0.05 | -0.13 | 0.09         | 0.16  |
| T_jl        | -0.02 | -0.02       | -0.05 | -0.38        | 0.13  | -0.31 | 0.13  | -0.02        | 0.05  |
| T_aug       | 0.16  | 0.09        | -0.02 | -0.20        | 0.24  | 0.24  | 0.45  | 0.09         | -0.42 |
| Prec_jn     | 0.35  | 0.20        | -0.05 | -0.31        | -0.38 | -0.16 | -0.09 | 0.20         | 0.27  |
| Prec_jl     | -0.13 | -0.13       | -0.02 | 0.38         | -0.05 | 0.16  | -0.27 | -0.20        | -0.13 |
| Prec_aug    | -0.05 | -0.20       | -0.16 | -0.05        | 0.02  | -0.42 | 0.31  | 0.24         | -0.20 |
| Wind_my     | -0.13 | -0.20       | -0.24 | -0.31        | 0.20  | -0.24 | 0.02  | -0.13        | -0.13 |
| Wind_jn     | 0.18  | -0.07       | -0.04 | -0.18        | 0.00  | -0.11 | 0.04  | -0.11        | 0.00  |
| Wind_jl     | -0.02 | 0.06        | 0.17  | -0.17        | -0.13 | -0.02 | -0.06 | <b>-0.46</b> | -0.09 |
| Wind_aug    | -0.22 | 0.00        | 0.11  | -0.04        | -0.07 | -0.11 | -0.04 | -0.26        | 0.04  |

Table S13. A Spearman rho correlation matrix for Siberian larch #1.

| Weather par | orgCa* | alcCa | hclCa                   | orgSr | alcSr | hclSr       | orgK         | alcK  | hclK         | orgAl | alcAl | hclAl |
|-------------|--------|-------|-------------------------|-------|-------|-------------|--------------|-------|--------------|-------|-------|-------|
| lv_jn_ind** | -0.43  | -0.22 | 0.01                    | -0.34 | 0.47  | 0.41        | -0.33        | -0.17 | -0.15        | 0.03  | 0.16  | -0.24 |
| lv_jl_ind   | -0.27  | 0.32  | -0.13                   | -0.43 | 0.00  | 0.40        | 0.06         | -0.04 | -0.02        | -0.38 | 0.09  | -0.18 |
| lv_au_ind   | 0.39   | 0.04  | -0.13                   | 0.38  | -0.15 | 0.25        | 0.45         | 0.03  | <b>-0.79</b> | 0.44  | 0.09  | -0.09 |
| lv-Vys_jn   | -0.34  | -0.41 | 0.13                    | -0.35 | 0.26  | 0.50        | -0.45        | -0.22 | -0.31        | -0.06 | 0.15  | -0.27 |
| lv-Vys_jl   | -0.36  | 0.27  | -0.25                   | -0.25 | 0.22  | 0.46        | 0.14         | -0.01 | -0.09        | -0.23 | 0.13  | -0.20 |
| lv-Vys_aug  | 0.51   | 0.11  | 0.07                    | 0.30  | -0.18 | 0.13        | 0.30         | -0.06 | <b>-0.65</b> | 0.36  | 0.01  | -0.08 |
| Hum_may     | 0.22   | 0.33  | 0.12                    | 0.53  | 0.35  | -0.19       | 0.31         | 0.27  | -0.17        | 0.22  | 0.06  | 0.45  |
| Hum_jn      | -0.33  | -0.50 | -0.05                   | -0.11 | 0.04  | 0.55        | -0.55        | -0.17 | -0.46        | -0.09 | 0.36  | -0.26 |
| Hum_jl      | -0.27  | 0.23  | 0.17                    | -0.33 | 0.32  | <b>0.70</b> | -0.01        | -0.03 | -0.24        | -0.35 | -0.10 | -0.12 |
| Hum_aug     | 0.45   | 0.50  | 0.05                    | 0.24  | 0.18  | 0.16        | 0.52         | -0.13 | -0.37        | 0.14  | -0.09 | -0.05 |
| T_may       | -0.31  | -0.60 | -0.08                   | -0.05 | -0.35 | 0.30        | <b>-0.65</b> | -0.09 | 0.02         | -0.33 | 0.15  | -0.15 |
| T_jn        | 0.12   | 0.07  | <b>0.65<sup>†</sup></b> | -0.31 | -0.32 | 0.07        | -0.26        | 0.13  | -0.05        | -0.56 | -0.15 | 0.24  |
| T_jl        | 0.35   | -0.25 | -0.01                   | 0.35  | -0.03 | -0.24       | -0.07        | -0.19 | -0.03        | 0.45  | -0.10 | -0.05 |
| T_aug       | -0.31  | -0.35 | -0.35                   | 0.06  | -0.57 | -0.04       | -0.05        | 0.51  | -0.38        | 0.02  | 0.59  | 0.28  |
| Prec_jn     | -0.26  | -0.36 | 0.21                    | -0.38 | 0.25  | 0.57        | -0.44        | -0.28 | -0.35        | -0.10 | 0.07  | -0.34 |
| Prec_jl     | -0.18  | 0.35  | -0.36                   | -0.09 | 0.28  | 0.42        | 0.22         | -0.21 | -0.02        | -0.05 | 0.01  | -0.36 |
| Prec_aug    | 0.46   | -0.01 | -0.05                   | 0.37  | -0.12 | -0.03       | 0.31         | -0.05 | -0.58        | 0.57  | 0.05  | -0.07 |
| Wind_my     | 0.00   | -0.47 | -0.23                   | 0.46  | 0.03  | -0.24       | -0.03        | -0.05 | 0.06         | 0.28  | 0.00  | -0.10 |
| Wind_jn     | -0.03  | -0.31 | -0.56                   | 0.10  | 0.07  | 0.28        | 0.03         | -0.42 | -0.18        | 0.37  | 0.12  | -0.54 |
| Wind_jl     | -0.14  | -0.05 | <b>-0.81</b>            | 0.06  | 0.00  | -0.05       | -0.03        | -0.38 | 0.30         | 0.35  | 0.21  | -0.49 |
| Wind_aug    | 0.27   | 0.08  | -0.54                   | 0.23  | 0.21  | -0.28       | 0.18         | -0.53 | 0.47         | 0.59  | -0.24 | -0.47 |

\* as in Table S1

\*\* as in Table S1

<sup>†</sup> as in Table S1

Table S13. A Spearman rho correlation matrix for Siberian larch #1 (continued 1).

| Weather par | orgP  | alcP  | hclP  | orgS  | alcS  | hclS         | orgTi | alcTi | hclTi        | orgMn        | alcMn | hclMn |
|-------------|-------|-------|-------|-------|-------|--------------|-------|-------|--------------|--------------|-------|-------|
| lv_jn_ind   | 0.06  | -0.12 | 0.57  | 0.47  | -0.45 | 0.07         | -0.52 | 0.22  | 0.58         | 0.45         | -0.01 | 0.40  |
| lv_jl_ind   | -0.55 | 0.14  | -0.55 | -0.18 | 0.60  | 0.30         | -0.35 | -0.19 | 0.01         | <b>-0.72</b> | -0.28 | -0.48 |
| lv_au_ind   | 0.30  | -0.25 | -0.34 | 0.45  | -0.25 | 0.11         | 0.10  | -0.48 | 0.16         | 0.33         | 0.53  | -0.45 |
| lv-Vys_jn   | 0.17  | -0.05 | 0.47  | 0.51  | -0.41 | 0.24         | -0.47 | 0.06  | <b>0.71</b>  | 0.53         | -0.02 | 0.35  |
| lv-Vys_jl   | -0.40 | 0.05  | -0.38 | -0.06 | 0.45  | 0.22         | -0.32 | -0.08 | 0.07         | -0.53        | -0.07 | -0.36 |
| lv-Vys_aug  | 0.27  | -0.12 | -0.30 | 0.44  | -0.24 | 0.06         | 0.12  | -0.26 | 0.08         | 0.25         | 0.31  | -0.35 |
| Hum_may     | 0.40  | -0.45 | 0.32  | -0.15 | -0.59 | 0.14         | 0.38  | 0.35  | 0.14         | 0.28         | 0.42  | 0.19  |
| Hum_jn      | 0.25  | -0.01 | 0.27  | 0.51  | -0.17 | 0.17         | -0.26 | 0.02  | 0.49         | 0.38         | -0.05 | 0.24  |
| Hum_jl      | -0.05 | -0.03 | -0.28 | 0.07  | 0.08  | 0.55         | -0.51 | 0.17  | 0.55         | -0.25        | 0.06  | -0.20 |
| Hum_aug     | 0.13  | -0.29 | -0.26 | -0.12 | -0.04 | 0.40         | 0.31  | -0.20 | 0.13         | -0.05        | 0.33  | -0.32 |
| T_may       | 0.21  | 0.22  | -0.04 | 0.06  | 0.34  | 0.03         | -0.04 | 0.02  | 0.03         | 0.01         | -0.21 | 0.21  |
| T_jn        | -0.13 | 0.33  | -0.41 | -0.21 | 0.16  | 0.52         | -0.15 | 0.19  | 0.26         | -0.41        | -0.36 | -0.24 |
| T_jl        | 0.56  | -0.23 | 0.47  | 0.29  | -0.49 | -0.33        | 0.29  | 0.04  | -0.07        | <b>0.71</b>  | 0.26  | 0.45  |
| T_aug       | -0.21 | -0.09 | -0.27 | 0.12  | 0.02  | -0.14        | -0.16 | -0.55 | -0.12        | -0.08        | -0.02 | -0.40 |
| Prec_jn     | 0.17  | 0.03  | 0.35  | 0.55  | -0.34 | 0.30         | -0.49 | 0.09  | <b>0.74</b>  | 0.46         | -0.04 | 0.27  |
| Prec_jl     | -0.28 | 0.04  | -0.36 | -0.03 | 0.53  | 0.05         | -0.13 | -0.05 | -0.13        | -0.47        | 0.00  | -0.29 |
| Prec_aug    | 0.34  | -0.21 | -0.03 | 0.55  | -0.45 | -0.18        | 0.13  | -0.27 | 0.02         | 0.50         | 0.39  | -0.17 |
| Wind_my     | 0.30  | 0.13  | 0.34  | 0.09  | -0.04 | -0.36        | 0.47  | 0.01  | -0.19        | 0.43         | 0.23  | 0.31  |
| Wind_jn     | 0.20  | -0.20 | 0.19  | 0.33  | 0.08  | -0.22        | 0.09  | -0.49 | -0.05        | 0.43         | 0.25  | 0.12  |
| Wind_jl     | -0.16 | -0.07 | 0.11  | 0.11  | 0.45  | <b>-0.68</b> | 0.12  | -0.29 | <b>-0.68</b> | -0.06        | -0.11 | 0.14  |
| Wind_aug    | 0.17  | -0.17 | 0.35  | 0.09  | 0.11  | <b>-0.72</b> | 0.33  | -0.09 | <b>-0.64</b> | 0.29         | 0.15  | 0.39  |

Table S13. A Spearman rho correlation matrix for Siberian larch #1 (continued 2).

| Weather par | orgFe       | alcFe        | hclFe       | orgCu        | alcCu | hclCu        | orgZn | alcZn        | hclZn |
|-------------|-------------|--------------|-------------|--------------|-------|--------------|-------|--------------|-------|
| lv_jn_ind   | -0.15       | 0.41         | 0.55        | 0.55         | -0.06 | <b>-0.83</b> | -0.01 | -0.08        | 0.15  |
| lv_jl_ind   | -0.27       | 0.15         | -0.09       | 0.06         | -0.31 | 0.51         | -0.14 | -0.48        | 0.10  |
| lv_au_ind   | <b>0.72</b> | -0.13        | 0.35        | -0.36        | 0.29  | 0.05         | -0.25 | 0.09         | -0.82 |
| lv-Vys_jn   | -0.04       | 0.25         | <b>0.71</b> | 0.50         | -0.01 | <b>-0.76</b> | 0.08  | -0.14        | -0.06 |
| lv-Vys_jl   | -0.24       | 0.33         | -0.06       | 0.16         | -0.17 | 0.34         | -0.16 | -0.49        | 0.10  |
| lv-Vys_aug  | 0.49        | -0.15        | 0.46        | -0.41        | 0.08  | -0.03        | -0.18 | 0.08         | -0.67 |
| Hum_may     | 0.04        | 0.34         | 0.32        | -0.22        | 0.54  | -0.28        | 0.45  | 0.33         | 0.11  |
| Hum_jn      | 0.01        | 0.02         | <b>0.81</b> | 0.48         | 0.03  | -0.53        | 0.13  | -0.03        | -0.10 |
| Hum_jl      | -0.27       | 0.50         | 0.41        | 0.38         | -0.01 | -0.04        | -0.15 | <b>-0.84</b> | -0.06 |
| Hum_aug     | 0.06        | 0.33         | 0.31        | <b>-0.65</b> | 0.13  | 0.29         | 0.45  | -0.09        | -0.25 |
| T_may       | -0.08       | -0.35        | 0.20        | 0.52         | -0.02 | 0.05         | 0.02  | -0.16        | 0.03  |
| T_jn        | -0.26       | -0.12        | 0.31        | 0.02         | -0.06 | 0.18         | 0.09  | -0.47        | -0.06 |
| T_jl        | 0.29        | -0.18        | 0.22        | -0.12        | 0.12  | -0.46        | 0.11  | 0.50         | -0.15 |
| T_aug       | <b>0.70</b> | <b>-0.69</b> | -0.15       | 0.25         | 0.35  | 0.17         | -0.46 | 0.58         | -0.33 |
| Prec_jn     | -0.09       | 0.28         | <b>0.77</b> | 0.45         | -0.09 | <b>-0.71</b> | 0.05  | -0.32        | -0.14 |
| Prec_jl     | -0.29       | 0.37         | -0.11       | -0.02        | -0.31 | 0.40         | -0.11 | -0.48        | 0.11  |
| Prec_aug    | <b>0.63</b> | -0.20        | 0.35        | -0.35        | 0.14  | -0.25        | -0.26 | 0.36         | -0.64 |
| Wind_my     | 0.14        | -0.06        | -0.28       | -0.07        | 0.17  | -0.06        | 0.15  | 0.19         | -0.05 |
| Wind_jn     | 0.30        | -0.03        | 0.04        | -0.08        | -0.09 | -0.04        | 0.07  | 0.23         | -0.21 |
| Wind_jl     | -0.01       | -0.19        | -0.41       | -0.03        | -0.46 | 0.20         | -0.11 | 0.46         | 0.28  |
| Wind_aug    | -0.03       | 0.02         | -0.45       | -0.30        | -0.40 | 0.00         | 0.00  | 0.39         | 0.21  |

Table S14. A Kendall tau correlation matrix for Siberian larch #1.

| Weather par | orgCa* | alcCa | hclCa                    | orgSr | alcSr | hclSr       | orgK         | alcK  | hclK         | orgAl | alcAl | hclAl |
|-------------|--------|-------|--------------------------|-------|-------|-------------|--------------|-------|--------------|-------|-------|-------|
| lv_jn_ind** | -0.35  | -0.13 | 0.02                     | -0.27 | 0.31  | 0.24        | -0.20        | -0.13 | -0.09        | 0.05  | 0.09  | -0.20 |
| lv_jl_ind   | -0.16  | 0.20  | -0.09                    | -0.31 | -0.02 | 0.35        | 0.05         | -0.02 | 0.02         | -0.27 | 0.05  | -0.16 |
| lv_au_ind   | 0.31   | 0.02  | -0.05                    | 0.24  | -0.13 | 0.16        | 0.31         | 0.02  | <b>-0.60</b> | 0.27  | 0.09  | -0.13 |
| lv-Vys_jn   | -0.27  | -0.27 | 0.09                     | -0.20 | 0.16  | 0.31        | -0.35        | -0.20 | -0.24        | -0.02 | 0.09  | -0.20 |
| lv-Vys_jl   | -0.20  | 0.16  | -0.20                    | -0.13 | 0.09  | 0.38        | 0.09         | 0.02  | -0.09        | -0.16 | 0.09  | -0.13 |
| lv-Vys_aug  | 0.38   | 0.09  | 0.09                     | 0.16  | -0.13 | 0.09        | 0.24         | -0.05 | -0.45        | 0.27  | 0.02  | -0.13 |
| Hum_may     | 0.16   | 0.24  | 0.09                     | 0.45  | 0.24  | -0.13       | 0.24         | 0.24  | -0.16        | 0.13  | 0.09  | 0.38  |
| Hum_jn      | -0.26  | -0.37 | 0.00                     | -0.04 | 0.04  | 0.44        | -0.40        | -0.15 | -0.33        | 0.00  | 0.26  | -0.22 |
| Hum_jl      | -0.16  | 0.20  | 0.13                     | -0.24 | 0.27  | <b>0.56</b> | 0.05         | -0.02 | -0.13        | -0.20 | -0.09 | -0.09 |
| Hum_aug     | 0.31   | 0.31  | 0.09                     | 0.16  | 0.16  | 0.09        | 0.38         | -0.13 | -0.24        | 0.13  | -0.05 | -0.05 |
| T_may       | -0.24  | -0.45 | -0.02                    | -0.02 | -0.31 | 0.20        | <b>-0.53</b> | -0.09 | 0.02         | -0.20 | 0.05  | -0.09 |
| T_jn        | 0.09   | 0.02  | 0.45                     | -0.27 | -0.20 | 0.09        | -0.20        | 0.02  | -0.09        | -0.38 | -0.13 | 0.09  |
| T_jl        | 0.20   | -0.16 | -0.02                    | 0.27  | -0.02 | -0.24       | -0.02        | -0.16 | -0.05        | 0.31  | -0.02 | -0.02 |
| T_aug       | -0.20  | -0.27 | -0.20                    | 0.02  | -0.42 | 0.02        | 0.02         | 0.38  | -0.31        | 0.05  | 0.45  | 0.24  |
| Prec_jn     | -0.24  | -0.31 | 0.20                     | -0.24 | 0.20  | 0.42        | -0.38        | -0.24 | -0.20        | 0.02  | 0.05  | -0.24 |
| Prec_jl     | -0.13  | 0.24  | -0.27                    | -0.05 | 0.16  | 0.31        | 0.16         | -0.13 | -0.02        | -0.02 | 0.02  | -0.27 |
| Prec_aug    | 0.31   | 0.02  | -0.05                    | 0.24  | -0.13 | -0.05       | 0.24         | -0.05 | -0.45        | 0.35  | 0.09  | -0.13 |
| Wind_my     | -0.02  | -0.39 | -0.20                    | 0.31  | 0.02  | -0.20       | -0.02        | -0.02 | 0.06         | 0.17  | -0.06 | -0.09 |
| Wind_jn     | -0.07  | -0.22 | -0.40                    | 0.07  | 0.07  | 0.18        | 0.00         | -0.26 | -0.11        | 0.18  | 0.11  | -0.33 |
| Wind_jl     | -0.17  | -0.02 | <b>-0.61<sup>†</sup></b> | -0.02 | 0.02  | -0.06       | -0.02        | -0.28 | 0.17         | 0.17  | 0.17  | -0.35 |
| Wind_aug    | 0.19   | 0.04  | -0.30                    | 0.19  | 0.15  | -0.22       | 0.11         | -0.34 | 0.41         | 0.41  | -0.15 | -0.34 |

\* as in Table S1

\*\* as in Table S1

<sup>†</sup> as in Table S1

Table S14. A Kendall tau correlation matrix for Siberian larch #1 (continued 1).

| Weather par | orgP  | alcP  | hcIP  | orgS  | alcS  | hcIS         | orgTi | alcTi | hcITi        | orgMn        | alcMn | hcIMn |
|-------------|-------|-------|-------|-------|-------|--------------|-------|-------|--------------|--------------|-------|-------|
| lv_jn_ind   | 0.05  | -0.16 | 0.31  | 0.35  | -0.38 | 0.09         | -0.38 | 0.13  | 0.42         | 0.35         | -0.02 | 0.20  |
| lv_jl_ind   | -0.35 | 0.09  | -0.38 | -0.13 | 0.45  | 0.27         | -0.20 | -0.13 | 0.02         | <b>-0.56</b> | -0.20 | -0.35 |
| lv_au_ind   | 0.27  | -0.24 | -0.20 | 0.20  | -0.16 | 0.09         | 0.13  | -0.38 | 0.13         | 0.20         | 0.35  | -0.31 |
| lv-Vys_jn   | 0.13  | -0.09 | 0.31  | 0.35  | -0.31 | 0.24         | -0.31 | 0.05  | <b>0.56</b>  | 0.42         | -0.02 | 0.20  |
| lv-Vys_jl   | -0.24 | 0.05  | -0.27 | -0.02 | 0.35  | 0.16         | -0.16 | -0.02 | 0.05         | -0.38        | -0.02 | -0.24 |
| lv-Vys_aug  | 0.20  | -0.09 | -0.20 | 0.27  | -0.16 | 0.02         | 0.13  | -0.16 | 0.05         | 0.13         | 0.20  | -0.24 |
| Hum_may     | 0.27  | -0.31 | 0.24  | -0.09 | -0.45 | 0.09         | 0.27  | 0.27  | 0.05         | 0.20         | 0.35  | 0.13  |
| Hum_jn      | 0.26  | 0.00  | 0.26  | 0.37  | -0.07 | 0.07         | -0.15 | -0.04 | 0.33         | 0.29         | -0.04 | 0.26  |
| Hum_jl      | -0.05 | 0.02  | -0.16 | 0.09  | 0.02  | 0.42         | -0.42 | 0.16  | 0.45         | -0.20        | 0.09  | -0.20 |
| Hum_aug     | 0.05  | -0.24 | -0.20 | -0.09 | -0.02 | 0.31         | 0.20  | -0.16 | 0.13         | -0.02        | 0.20  | -0.24 |
| T_may       | 0.24  | 0.09  | -0.09 | 0.02  | 0.31  | 0.05         | 0.02  | 0.02  | 0.02         | 0.02         | -0.13 | 0.16  |
| T_jn        | -0.02 | 0.20  | -0.27 | -0.16 | 0.05  | 0.31         | -0.09 | 0.20  | 0.20         | -0.31        | -0.24 | -0.16 |
| T_jl        | 0.38  | -0.20 | 0.35  | 0.16  | -0.35 | -0.24        | 0.24  | 0.02  | -0.05        | <b>0.53</b>  | 0.16  | 0.31  |
| T_aug       | -0.16 | -0.09 | -0.20 | 0.05  | 0.05  | -0.13        | -0.09 | -0.38 | -0.02        | -0.02        | -0.02 | -0.31 |
| Prec_jn     | 0.09  | 0.02  | 0.27  | 0.38  | -0.27 | 0.27         | -0.35 | 0.02  | <b>0.60</b>  | 0.38         | -0.05 | 0.16  |
| Prec_jl     | -0.16 | 0.05  | -0.27 | -0.02 | 0.42  | 0.02         | -0.02 | -0.02 | -0.09        | -0.31        | -0.02 | -0.16 |
| Prec_aug    | 0.27  | -0.16 | -0.05 | 0.35  | -0.31 | -0.20        | 0.20  | -0.16 | -0.02        | 0.27         | 0.27  | -0.09 |
| Wind_my     | 0.24  | 0.06  | 0.13  | 0.09  | -0.06 | -0.24        | 0.28  | -0.02 | -0.13        | 0.31         | 0.13  | 0.17  |
| Wind_jn     | 0.11  | -0.22 | 0.07  | 0.18  | 0.07  | -0.18        | 0.04  | -0.33 | 0.00         | 0.33         | 0.18  | 0.11  |
| Wind_jl     | -0.09 | -0.13 | 0.06  | 0.09  | 0.31  | <b>-0.50</b> | 0.09  | -0.20 | <b>-0.46</b> | -0.09        | -0.06 | 0.09  |
| Wind_aug    | 0.15  | -0.11 | 0.26  | 0.04  | 0.11  | <b>-0.52</b> | 0.30  | -0.07 | -0.41        | 0.22         | 0.07  | 0.30  |

Table S14. A Kendall tau correlation matrix for Siberian larch #1 (continued 2).

| Weather par | orgFe       | alcFe        | hclFe       | orgCu | alcCu | hclCu        | orgZn       | alcZn        | hclZn        |
|-------------|-------------|--------------|-------------|-------|-------|--------------|-------------|--------------|--------------|
| lv_jn_ind   | -0.05       | 0.31         | 0.45        | 0.45  | -0.05 | <b>-0.67</b> | -0.02       | -0.02        | 0.13         |
| lv_jl_ind   | -0.16       | 0.05         | -0.09       | 0.05  | -0.24 | 0.38         | -0.05       | -0.35        | 0.02         |
| lv_au_ind   | <b>0.53</b> | -0.13        | 0.24        | -0.27 | 0.24  | -0.02        | -0.16       | -0.02        | <b>-0.67</b> |
| lv-Vys_jn   | 0.02        | 0.16         | <b>0.53</b> | 0.38  | 0.02  | <b>-0.60</b> | 0.05        | -0.09        | -0.02        |
| lv-Vys_jl   | -0.13       | 0.16         | -0.05       | 0.09  | -0.13 | 0.27         | -0.09       | -0.31        | 0.05         |
| lv-Vys_aug  | 0.38        | -0.05        | 0.38        | -0.27 | 0.02  | -0.09        | -0.16       | 0.05         | <b>-0.53</b> |
| Hum_may     | 0.02        | 0.24         | 0.16        | -0.13 | 0.45  | -0.24        | <b>0.49</b> | 0.27         | 0.20         |
| Hum_jn      | 0.04        | 0.00         | <b>0.62</b> | 0.37  | 0.07  | -0.40        | 0.15        | 0.00         | -0.11        |
| Hum_jl      | -0.16       | 0.42         | 0.35        | 0.35  | -0.02 | -0.05        | -0.13       | <b>-0.71</b> | -0.05        |
| Hum_aug     | 0.02        | 0.24         | 0.24        | -0.42 | 0.09  | 0.20         | 0.27        | -0.02        | -0.24        |
| T_may       | -0.09       | -0.31        | 0.13        | 0.35  | 0.05  | 0.09         | 0.02        | -0.05        | 0.02         |
| T_jn        | -0.20       | -0.05        | 0.24        | 0.02  | -0.05 | 0.13         | 0.13        | -0.31        | -0.02        |
| T_jl        | 0.13        | -0.16        | 0.13        | -0.09 | 0.13  | -0.35        | 0.09        | 0.31         | -0.13        |
| T_aug       | <b>0.53</b> | <b>-0.56</b> | -0.05       | 0.24  | 0.24  | 0.13         | -0.38       | <b>0.49</b>  | -0.31        |
| Prec_jn     | -0.09       | 0.20         | <b>0.64</b> | 0.42  | -0.02 | <b>-0.56</b> | 0.02        | -0.20        | -0.13        |
| Prec_jl     | -0.13       | 0.24         | -0.05       | -0.05 | -0.20 | 0.27         | -0.09       | -0.31        | 0.05         |
| Prec_aug    | <b>0.53</b> | -0.13        | 0.24        | -0.27 | 0.02  | -0.24        | -0.24       | 0.20         | -0.45        |
| Wind_my     | 0.17        | -0.06        | -0.17       | -0.06 | 0.13  | -0.06        | 0.13        | 0.17         | -0.02        |
| Wind_jn     | 0.26        | 0.00         | -0.07       | -0.04 | -0.04 | -0.07        | 0.04        | 0.11         | -0.04        |
| Wind_jl     | 0.06        | -0.13        | -0.28       | -0.02 | -0.35 | 0.13         | -0.06       | 0.28         | 0.24         |
| Wind_aug    | 0.04        | 0.00         | -0.30       | -0.15 | -0.30 | -0.04        | -0.07       | 0.26         | 0.04         |

Table S15. A Spearman rho correlation matrix for Siberian larch #2.

| Weather par | orgCa*                   | alcCa | hclCa       | orgSr        | alcSr        | hclSr        | orgK         | alcK  | hclK  | orgAl | alcAl | hclAl |
|-------------|--------------------------|-------|-------------|--------------|--------------|--------------|--------------|-------|-------|-------|-------|-------|
| lv_jn_ind** | 0.51                     | -0.02 | -0.35       | 0.21         | -0.06        | <b>-0.63</b> | 0.37         | 0.15  | 0.04  | -0.41 | 0.31  | -0.01 |
| lv_jl_ind   | 0.32                     | 0.07  | 0.23        | 0.21         | 0.46         | 0.00         | <b>0.57</b>  | -0.29 | -0.06 | -0.10 | -0.07 | 0.40  |
| lv_au_ind   | -0.31                    | -0.34 | 0.23        | -0.31        | -0.17        | 0.31         | -0.03        | -0.15 | -0.05 | 0.13  | 0.06  | 0.46  |
| lv-Vys_jn   | 0.34                     | -0.05 | -0.34       | 0.09         | -0.23        | -0.55        | 0.10         | 0.21  | 0.08  | -0.31 | 0.25  | -0.10 |
| lv-Vys_jl   | 0.35                     | 0.06  | 0.13        | 0.21         | 0.43         | -0.02        | <b>0.56</b>  | -0.33 | 0.07  | -0.14 | -0.12 | 0.31  |
| lv-Vys_aug  | -0.15                    | -0.23 | 0.23        | -0.21        | -0.13        | 0.09         | 0.09         | -0.26 | -0.06 | -0.07 | -0.13 | 0.26  |
| Hum_may     | 0.09                     | 0.20  | -0.27       | 0.30         | 0.12         | 0.10         | 0.04         | -0.30 | -0.10 | 0.10  | -0.30 | -0.15 |
| Hum_jn      | 0.33                     | -0.09 | -0.07       | -0.02        | -0.40        | <b>-0.64</b> | 0.07         | 0.37  | 0.11  | -0.48 | 0.14  | -0.40 |
| Hum_jl      | 0.34                     | -0.09 | 0.08        | 0.03         | 0.03         | 0.03         | 0.43         | -0.23 | 0.12  | -0.14 | -0.22 | 0.15  |
| Hum_aug     | 0.26                     | 0.16  | -0.08       | 0.26         | 0.25         | -0.02        | 0.33         | -0.48 | 0.11  | -0.15 | -0.33 | 0.08  |
| T_may       | -0.41                    | -0.43 | 0.55        | <b>-0.62</b> | -0.47        | 0.04         | -0.33        | 0.14  | 0.17  | -0.07 | -0.05 | -0.10 |
| T_jn        | 0.18                     | -0.10 | <b>0.60</b> | -0.08        | -0.15        | -0.05        | 0.39         | 0.23  | 0.08  | -0.18 | 0.01  | -0.01 |
| T_jl        | -0.05                    | 0.23  | -0.24       | 0.08         | -0.17        | -0.21        | -0.23        | 0.26  | 0.22  | 0.05  | -0.07 | -0.29 |
| T_aug       | <b>-0.79<sup>†</sup></b> | -0.53 | -0.18       | -0.53        | <b>-0.60</b> | 0.38         | <b>-0.84</b> | -0.15 | -0.33 | 0.34  | -0.04 | 0.03  |
| Prec_jn     | 0.36                     | -0.02 | -0.27       | 0.08         | -0.21        | -0.51        | 0.19         | 0.25  | 0.10  | -0.26 | 0.24  | -0.03 |
| Prec_jl     | 0.24                     | 0.13  | 0.17        | 0.24         | <b>0.58</b>  | 0.09         | 0.53         | -0.34 | -0.08 | -0.10 | -0.20 | 0.42  |
| Prec_aug    | -0.38                    | -0.37 | 0.12        | -0.41        | -0.39        | 0.18         | -0.21        | -0.08 | -0.11 | 0.05  | -0.01 | 0.25  |
| Wind_my     | -0.21                    | 0.09  | -0.30       | 0.11         | 0.10         | 0.05         | -0.21        | 0.04  | 0.07  | 0.03  | -0.08 | 0.18  |
| Wind_jn     | -0.32                    | -0.03 | -0.34       | -0.08        | 0.00         | -0.12        | -0.47        | -0.16 | -0.21 | -0.12 | -0.09 | 0.04  |
| Wind_jl     | -0.23                    | -0.04 | -0.02       | -0.23        | 0.23         | 0.21         | -0.27        | -0.31 | -0.25 | 0.18  | 0.02  | 0.06  |
| Wind_aug    | -0.25                    | 0.12  | -0.51       | -0.12        | 0.23         | -0.10        | -0.38        | -0.34 | -0.12 | 0.22  | 0.18  | -0.17 |

\* as in Table S1

\*\* as in Table S1

<sup>†</sup> as in Table S1

Table S15. A Spearman rho correlation matrix for Siberian larch #2 (continued 1).

| Weather par | orgP  | alcP  | hclP  | orgS         | alcS         | hclS  | orgTi | alcTi        | hclTi        | orgMn        | alcMn        | hclMn       |
|-------------|-------|-------|-------|--------------|--------------|-------|-------|--------------|--------------|--------------|--------------|-------------|
| lv_jn_ind   | -0.07 | -0.20 | -0.29 | 0.36         | -0.31        | 0.04  | -0.09 | 0.37         | -0.07        | 0.24         | 0.08         | 0.01        |
| lv_jl_ind   | -0.12 | -0.29 | -0.12 | -0.40        | -0.38        | -0.50 | -0.09 | <b>0.69</b>  | 0.31         | 0.40         | 0.12         | -0.43       |
| lv_au_ind   | 0.14  | 0.24  | -0.01 | <b>-0.69</b> | 0.32         | 0.08  | 0.16  | -0.01        | 0.10         | -0.29        | -0.26        | 0.27        |
| lv-Vys_jn   | 0.01  | -0.15 | -0.23 | 0.18         | -0.30        | 0.03  | -0.24 | 0.19         | -0.14        | 0.03         | -0.01        | -0.02       |
| lv-Vys_jl   | -0.03 | -0.35 | -0.23 | -0.31        | -0.46        | -0.33 | -0.02 | <b>0.59</b>  | 0.36         | 0.44         | 0.15         | -0.45       |
| lv-Vys_aug  | -0.12 | 0.13  | -0.13 | <b>-0.56</b> | 0.16         | -0.17 | 0.23  | 0.01         | -0.05        | -0.21        | -0.14        | 0.17        |
| Hum_may     | 0.00  | -0.25 | -0.07 | 0.31         | -0.31        | -0.45 | 0.01  | -0.22        | -0.16        | 0.10         | 0.35         | 0.01        |
| Hum_jn      | -0.26 | -0.12 | -0.38 | 0.30         | -0.23        | 0.19  | 0.06  | 0.09         | -0.03        | -0.06        | -0.09        | -0.04       |
| Hum_jl      | 0.04  | -0.30 | -0.32 | -0.43        | <b>-0.57</b> | -0.28 | 0.16  | 0.34         | 0.33         | 0.19         | 0.04         | -0.35       |
| Hum_aug     | -0.06 | -0.48 | -0.38 | -0.34        | -0.54        | -0.39 | 0.17  | 0.15         | 0.11         | 0.29         | 0.36         | -0.35       |
| T_may       | -0.13 | 0.32  | -0.15 | <b>-0.62</b> | 0.30         | 0.31  | 0.03  | -0.13        | 0.17         | -0.51        | <b>-0.58</b> | -0.01       |
| T_jn        | -0.37 | 0.01  | -0.24 | -0.28        | 0.07         | 0.03  | 0.44  | 0.21         | 0.36         | 0.00         | -0.07        | -0.08       |
| T_jl        | 0.01  | 0.38  | 0.46  | 0.40         | 0.33         | -0.12 | -0.40 | -0.49        | <b>-0.72</b> | -0.21        | 0.07         | 0.30        |
| T_aug       | 0.34  | 0.39  | 0.08  | -0.11        | 0.39         | 0.08  | -0.24 | <b>-0.60</b> | -0.25        | <b>-0.81</b> | -0.49        | <b>0.62</b> |
| Prec_jn     | -0.02 | 0.00  | -0.05 | 0.10         | -0.19        | -0.09 | -0.26 | 0.20         | -0.25        | 0.02         | -0.03        | 0.04        |
| Prec_jl     | -0.05 | -0.18 | 0.05  | -0.19        | -0.22        | -0.41 | -0.03 | <b>0.59</b>  | 0.23         | 0.43         | 0.15         | -0.33       |
| Prec_aug    | 0.05  | 0.42  | 0.07  | -0.49        | 0.47         | 0.08  | 0.20  | -0.25        | -0.23        | -0.49        | -0.33        | 0.49        |
| Wind_my     | 0.34  | 0.28  | 0.41  | 0.28         | 0.37         | 0.15  | -0.35 | -0.25        | -0.38        | -0.10        | 0.05         | 0.33        |
| Wind_jn     | 0.10  | 0.10  | 0.16  | 0.08         | 0.17         | 0.00  | -0.31 | -0.14        | -0.44        | -0.22        | -0.09        | 0.17        |
| Wind_jl     | -0.02 | -0.02 | 0.10  | -0.27        | -0.03        | -0.05 | 0.02  | 0.12         | 0.02         | 0.05         | -0.16        | -0.22       |
| Wind_aug    | -0.06 | 0.29  | 0.35  | 0.36         | 0.35         | 0.03  | -0.12 | -0.33        | <b>-0.71</b> | 0.05         | -0.02        | 0.26        |

Table S15. A Spearman rho correlation matrix for Siberian larch #2 (continued 2).

| Weather par | orgFe        | alcFe | hclFe | orgCu | alcCu       | hclCu        | orgZn        | alcZn | hclZn        |
|-------------|--------------|-------|-------|-------|-------------|--------------|--------------|-------|--------------|
| lv_jn_ind   | -0.04        | 0.03  | 0.19  | 0.15  | <b>0.62</b> | -0.41        | 0.17         | -0.44 | 0.23         |
| lv_jl_ind   | 0.25         | -0.12 | -0.01 | -0.12 | 0.05        | 0.19         | -0.03        | -0.36 | 0.40         |
| lv_au_ind   | -0.03        | -0.27 | -0.23 | 0.13  | -0.24       | 0.52         | 0.13         | 0.32  | -0.01        |
| lv-Vys_jn   | -0.20        | 0.20  | 0.12  | 0.03  | <b>0.60</b> | -0.50        | 0.10         | -0.33 | 0.15         |
| lv-Vys_jl   | 0.30         | -0.14 | 0.05  | -0.12 | 0.07        | 0.10         | 0.03         | -0.44 | 0.49         |
| lv-Vys_aug  | 0.01         | -0.13 | -0.10 | 0.19  | -0.02       | 0.30         | 0.00         | 0.05  | 0.04         |
| Hum_may     | 0.31         | 0.26  | -0.21 | 0.01  | -0.17       | 0.11         | -0.25        | 0.08  | -0.02        |
| Hum_jn      | -0.33        | 0.10  | 0.39  | 0.25  | <b>0.64</b> | <b>-0.65</b> | 0.10         | -0.37 | 0.12         |
| Hum_jl      | 0.15         | -0.07 | 0.07  | 0.09  | 0.05        | 0.03         | 0.07         | -0.29 | 0.45         |
| Hum_aug     | 0.49         | 0.23  | -0.10 | -0.22 | -0.01       | 0.21         | 0.08         | -0.19 | 0.53         |
| T_may       | <b>-0.59</b> | -0.26 | 0.23  | 0.18  | 0.10        | -0.25        | -0.09        | -0.12 | -0.05        |
| T_jn        | 0.01         | -0.27 | 0.29  | 0.42  | -0.10       | 0.21         | 0.29         | 0.12  | 0.17         |
| T_jl        | -0.23        | 0.36  | 0.06  | 0.16  | 0.25        | -0.48        | -0.12        | 0.02  | -0.51        |
| T_aug       | <b>-0.56</b> | -0.09 | -0.45 | 0.15  | -0.15       | 0.04         | <b>-0.59</b> | 0.38  | <b>-0.59</b> |
| Prec_jn     | -0.21        | 0.19  | 0.13  | 0.14  | <b>0.57</b> | -0.46        | 0.13         | -0.29 | 0.04         |
| Prec_jl     | 0.29         | -0.20 | 0.02  | -0.09 | 0.03        | 0.16         | -0.11        | -0.39 | 0.23         |
| Prec_aug    | -0.23        | -0.17 | -0.17 | 0.29  | -0.05       | 0.28         | -0.01        | 0.29  | -0.27        |
| Wind_my     | -0.08        | 0.05  | -0.12 | -0.05 | 0.16        | -0.17        | -0.12        | 0.05  | -0.42        |
| Wind_jn     | -0.23        | 0.23  | -0.17 | -0.33 | 0.40        | -0.32        | -0.36        | -0.21 | -0.28        |
| Wind_jl     | 0.01         | 0.00  | -0.15 | -0.46 | -0.15       | 0.13         | -0.20        | -0.16 | 0.09         |
| Wind_aug    | 0.05         | 0.16  | -0.15 | -0.31 | 0.05        | -0.12        | -0.23        | -0.28 | -0.24        |

Table S16. A Kendall tau correlation matrix for Siberian larch #2.

| Weather par | orgCa*                   | alcCa | hclCa | orgSr        | alcSr        | hclSr        | orgK         | alcK  | hclK  | orgAl | alcAl | hclAl |
|-------------|--------------------------|-------|-------|--------------|--------------|--------------|--------------|-------|-------|-------|-------|-------|
| lv_jn_ind** | 0.41                     | -0.03 | -0.31 | 0.18         | 0.00         | -0.41        | 0.28         | 0.10  | 0.03  | -0.28 | 0.21  | 0.00  |
| lv_jl_ind   | 0.23                     | 0.10  | 0.18  | 0.15         | 0.28         | 0.03         | <b>0.46</b>  | -0.23 | 0.00  | -0.05 | -0.08 | 0.28  |
| lv_au_ind   | -0.23                    | -0.26 | 0.13  | -0.21        | -0.18        | 0.28         | 0.00         | -0.13 | 0.00  | 0.10  | 0.03  | 0.28  |
| lv-Vys_jn   | 0.23                     | 0.00  | -0.28 | 0.05         | -0.18        | -0.38        | 0.05         | 0.03  | 0.05  | -0.15 | 0.18  | -0.08 |
| lv-Vys_jl   | 0.33                     | 0.05  | 0.13  | 0.15         | 0.33         | 0.03         | <b>0.46</b>  | -0.23 | 0.05  | -0.10 | -0.13 | 0.28  |
| lv-Vys_aug  | -0.13                    | -0.15 | 0.13  | -0.10        | -0.13        | 0.03         | 0.05         | -0.23 | -0.05 | -0.10 | -0.13 | 0.23  |
| Hum_may     | 0.08                     | 0.15  | -0.18 | 0.21         | 0.08         | 0.08         | 0.05         | -0.18 | -0.10 | 0.05  | -0.18 | -0.13 |
| Hum_jn      | 0.23                     | -0.10 | -0.08 | -0.05        | -0.33        | <b>-0.49</b> | 0.05         | 0.23  | 0.05  | -0.26 | 0.08  | -0.23 |
| Hum_jl      | 0.21                     | -0.03 | 0.05  | 0.03         | 0.00         | 0.10         | 0.33         | -0.15 | 0.08  | -0.13 | -0.15 | 0.15  |
| Hum_aug     | 0.22                     | 0.09  | -0.12 | 0.19         | 0.12         | 0.01         | 0.25         | -0.40 | 0.09  | -0.12 | -0.25 | 0.01  |
| T_may       | -0.33                    | -0.31 | 0.38  | <b>-0.46</b> | -0.33        | 0.03         | -0.26        | 0.13  | 0.10  | -0.05 | -0.03 | -0.08 |
| T_jn        | 0.13                     | -0.05 | 0.33  | 0.00         | -0.13        | -0.03        | 0.26         | 0.13  | 0.05  | -0.21 | -0.03 | -0.03 |
| T_jl        | -0.05                    | 0.18  | -0.15 | 0.03         | -0.15        | -0.21        | -0.18        | 0.21  | 0.13  | 0.03  | -0.05 | -0.21 |
| T_aug       | <b>-0.59<sup>†</sup></b> | -0.41 | -0.08 | -0.41        | <b>-0.49</b> | 0.23         | <b>-0.67</b> | -0.08 | -0.21 | 0.26  | 0.03  | 0.03  |
| Prec_jn     | 0.26                     | -0.03 | -0.21 | -0.03        | -0.21        | -0.31        | 0.08         | 0.10  | 0.03  | -0.13 | 0.15  | 0.00  |
| Prec_jl     | 0.18                     | 0.10  | 0.13  | 0.15         | <b>0.44</b>  | 0.08         | <b>0.46</b>  | -0.28 | -0.10 | -0.05 | -0.13 | 0.33  |
| Prec_aug    | -0.28                    | -0.26 | 0.03  | -0.26        | -0.28        | 0.13         | -0.15        | -0.08 | -0.05 | 0.05  | -0.03 | 0.13  |
| Wind_my     | -0.13                    | 0.05  | -0.18 | 0.05         | 0.08         | 0.05         | -0.16        | 0.05  | 0.08  | 0.05  | -0.08 | 0.10  |
| Wind_jn     | -0.17                    | -0.04 | -0.14 | -0.04        | 0.14         | -0.12        | -0.25        | -0.04 | -0.19 | -0.14 | -0.09 | 0.06  |
| Wind_jl     | -0.17                    | -0.04 | -0.01 | -0.19        | 0.09         | 0.12         | -0.19        | -0.32 | -0.25 | 0.09  | 0.01  | 0.01  |
| Wind_aug    | -0.19                    | 0.14  | -0.35 | -0.06        | 0.17         | -0.06        | -0.22        | -0.32 | -0.06 | 0.17  | 0.09  | -0.12 |

\* as in Table S1

\*\* as in Table S1

<sup>†</sup> as in Table S1

Table S16. A Kendall tau correlation matrix for Siberian larch #2 (continued 1).

| Weather par | orgP  | alcP  | hcIP  | orgS  | alcS  | hcIS  | orgTi | alcTi | hcITi | orgMn | alcMn | hcIMn |
|-------------|-------|-------|-------|-------|-------|-------|-------|-------|-------|-------|-------|-------|
| lv_jn_ind   | -0.03 | -0.08 | -0.18 | 0.33  | -0.15 | -0.01 | -0.10 | 0.26  | -0.05 | 0.23  | 0.10  | -0.03 |
| lv_jl_ind   | -0.10 | -0.21 | -0.05 | -0.26 | -0.23 | -0.41 | -0.13 | 0.54  | 0.23  | 0.26  | 0.08  | -0.31 |
| lv_au_ind   | 0.10  | 0.15  | 0.00  | -0.56 | 0.18  | 0.04  | 0.08  | -0.03 | 0.08  | -0.21 | -0.18 | 0.21  |
| lv-Vys_jn   | 0.00  | -0.05 | -0.10 | 0.15  | -0.23 | 0.01  | -0.18 | 0.13  | -0.13 | 0.00  | -0.03 | -0.05 |
| lv-Vys_jl   | -0.05 | -0.21 | -0.15 | -0.26 | -0.28 | -0.25 | -0.03 | 0.44  | 0.28  | 0.36  | 0.08  | -0.31 |
| lv-Vys_aug  | -0.05 | 0.10  | -0.10 | -0.41 | 0.08  | -0.17 | 0.13  | -0.03 | -0.03 | -0.15 | -0.08 | 0.15  |
| Hum_may     | -0.05 | -0.15 | -0.05 | 0.26  | -0.18 | -0.35 | 0.03  | -0.08 | -0.08 | 0.05  | 0.28  | 0.05  |
| Hum_jn      | -0.15 | -0.05 | -0.26 | 0.26  | -0.13 | 0.17  | 0.03  | 0.03  | -0.03 | -0.05 | -0.13 | -0.05 |
| Hum_jl      | 0.08  | -0.23 | -0.23 | -0.38 | -0.46 | -0.25 | 0.05  | 0.21  | 0.26  | 0.13  | 0.05  | -0.23 |
| Hum_aug     | -0.01 | -0.35 | -0.27 | -0.25 | -0.37 | -0.29 | 0.14  | 0.12  | 0.12  | 0.19  | 0.22  | -0.30 |
| T_may       | -0.10 | 0.26  | -0.10 | -0.41 | 0.28  | 0.20  | 0.03  | -0.03 | 0.18  | -0.41 | -0.44 | 0.00  |
| T_jn        | -0.15 | 0.05  | -0.15 | -0.21 | 0.08  | 0.01  | 0.33  | 0.18  | 0.28  | -0.05 | -0.03 | -0.05 |
| T_jl        | -0.03 | 0.28  | 0.33  | 0.28  | 0.21  | -0.09 | -0.36 | -0.36 | -0.51 | -0.13 | 0.05  | 0.28  |
| T_aug       | 0.26  | 0.26  | 0.05  | -0.05 | 0.33  | 0.04  | -0.18 | -0.44 | -0.18 | -0.62 | -0.38 | 0.46  |
| Prec_jn     | 0.03  | 0.08  | 0.03  | 0.08  | -0.10 | -0.12 | -0.21 | 0.15  | -0.21 | -0.03 | -0.05 | 0.08  |
| Prec_jl     | -0.05 | -0.10 | 0.05  | -0.10 | -0.13 | -0.30 | -0.08 | 0.44  | 0.18  | 0.31  | 0.08  | -0.21 |
| Prec_aug    | 0.05  | 0.36  | 0.05  | -0.31 | 0.33  | 0.04  | 0.08  | -0.13 | -0.13 | -0.36 | -0.23 | 0.36  |
| Wind_my     | 0.29  | 0.29  | 0.34  | 0.13  | 0.31  | 0.12  | -0.21 | -0.18 | -0.26 | -0.10 | 0.03  | 0.26  |
| Wind_jn     | 0.04  | 0.09  | 0.12  | 0.06  | 0.12  | 0.03  | -0.19 | -0.09 | -0.30 | -0.09 | -0.06 | 0.14  |
| Wind_jl     | 0.04  | -0.01 | 0.09  | -0.25 | 0.01  | -0.05 | 0.06  | 0.04  | -0.01 | 0.01  | -0.12 | -0.17 |
| Wind_aug    | -0.04 | 0.22  | 0.27  | 0.27  | 0.25  | 0.03  | -0.09 | -0.25 | -0.55 | 0.04  | -0.04 | 0.06  |

Table S16. A Kendall tau correlation matrix for Siberian larch #2 (continued 2).

| Weather par | orgFe        | alcFe | hclFe | orgCu | alcCu       | hclCu | orgZn        | alcZn | hclZn       |
|-------------|--------------|-------|-------|-------|-------------|-------|--------------|-------|-------------|
| lv_jn_ind   | -0.03        | 0.05  | 0.13  | 0.10  | <b>0.44</b> | -0.33 | 0.08         | -0.33 | 0.21        |
| lv_jl_ind   | 0.15         | -0.08 | 0.00  | -0.08 | 0.00        | 0.15  | 0.00         | -0.26 | 0.28        |
| lv_au_ind   | 0.00         | -0.18 | -0.15 | 0.08  | -0.21       | 0.41  | 0.10         | 0.26  | -0.03       |
| lv-Vys_jn   | -0.15        | 0.13  | 0.10  | 0.03  | <b>0.46</b> | -0.36 | 0.10         | -0.26 | 0.08        |
| lv-Vys_jl   | 0.15         | -0.03 | 0.05  | -0.08 | 0.05        | 0.05  | 0.00         | -0.31 | 0.33        |
| lv-Vys_aug  | 0.00         | -0.13 | -0.05 | 0.13  | 0.00        | 0.26  | 0.00         | 0.00  | 0.08        |
| Hum_may     | 0.15         | 0.18  | -0.10 | 0.03  | 0.00        | 0.10  | -0.15        | 0.05  | -0.08       |
| Hum_jn      | -0.26        | 0.03  | 0.31  | 0.18  | <b>0.46</b> | -0.41 | 0.05         | -0.26 | 0.08        |
| Hum_jl      | 0.08         | 0.00  | 0.03  | 0.05  | 0.03        | 0.03  | 0.08         | -0.18 | 0.36        |
| Hum_aug     | 0.35         | 0.12  | -0.09 | -0.12 | -0.04       | 0.14  | 0.04         | -0.17 | <b>0.43</b> |
| T_may       | <b>-0.46</b> | -0.18 | 0.15  | 0.13  | 0.15        | -0.21 | -0.05        | -0.10 | -0.08       |
| T_jn        | 0.00         | -0.18 | 0.26  | 0.38  | -0.05       | 0.10  | 0.26         | 0.15  | 0.08        |
| T_jl        | -0.18        | 0.26  | 0.03  | 0.05  | 0.13        | -0.33 | -0.08        | 0.03  | -0.36       |
| T_aug       | -0.41        | -0.08 | -0.36 | 0.18  | -0.05       | 0.05  | <b>-0.46</b> | 0.26  | -0.33       |
| Prec_jn     | -0.23        | 0.15  | 0.08  | 0.10  | 0.38        | -0.33 | 0.13         | -0.13 | 0.00        |
| Prec_jl     | 0.21         | -0.08 | 0.05  | -0.13 | 0.00        | 0.15  | -0.05        | -0.26 | 0.13        |
| Prec_aug    | -0.15        | -0.08 | -0.10 | 0.18  | 0.00        | 0.26  | 0.00         | 0.21  | -0.23       |
| Wind_my     | -0.08        | 0.00  | -0.08 | -0.03 | 0.13        | -0.13 | -0.05        | 0.08  | -0.36       |
| Wind_jn     | -0.14        | 0.14  | -0.12 | -0.25 | 0.30        | -0.22 | -0.27        | -0.17 | -0.25       |
| Wind_jl     | 0.01         | -0.01 | -0.09 | -0.30 | -0.09       | 0.09  | -0.12        | -0.12 | 0.09        |
| Wind_aug    | 0.04         | 0.06  | -0.12 | -0.22 | 0.01        | -0.09 | -0.17        | -0.25 | -0.14       |

Table S17. A Spearman rho correlation matrix for Siberian larch #3.

| Weather par        | orgCa* | alcCa | hclCa | orgSr | alcSr                    | hclSr        | orgK        | alcK        | hclK        | orgAl       | alcAl        | hclAl        |
|--------------------|--------|-------|-------|-------|--------------------------|--------------|-------------|-------------|-------------|-------------|--------------|--------------|
| <b>lv_jn_ind**</b> | -0.30  | -0.31 | 0.08  | -0.21 | -0.22                    | 0.25         | 0.01        | -0.38       | 0.41        | 0.09        | -0.10        | -0.42        |
| <b>lv_jl_ind</b>   | 0.06   | 0.05  | -0.51 | -0.21 | -0.53                    | <b>-0.57</b> | -0.20       | 0.20        | -0.13       | <b>0.57</b> | 0.45         | 0.04         |
| <b>lv_au_ind</b>   | 0.38   | 0.32  | 0.28  | 0.12  | 0.25                     | -0.18        | 0.02        | 0.29        | -0.25       | 0.52        | 0.19         | 0.10         |
| <b>lv-Vys_jn</b>   | -0.28  | -0.35 | 0.01  | -0.27 | -0.07                    | 0.07         | 0.05        | -0.32       | 0.48        | 0.10        | 0.04         | -0.43        |
| <b>lv-Vys_jl</b>   | 0.06   | -0.04 | -0.54 | -0.13 | <b>-0.57<sup>†</sup></b> | -0.37        | -0.25       | 0.18        | -0.13       | 0.51        | 0.37         | 0.03         |
| <b>lv-Vys_aug</b>  | 0.20   | 0.23  | 0.18  | -0.14 | 0.10                     | -0.14        | 0.05        | 0.20        | 0.01        | 0.38        | 0.21         | -0.09        |
| <b>Hum_may</b>     | -0.01  | 0.25  | -0.02 | 0.24  | 0.08                     | 0.33         | 0.23        | -0.20       | 0.02        | -0.14       | <b>-0.60</b> | -0.01        |
| <b>Hum_jn</b>      | -0.50  | -0.47 | 0.10  | -0.45 | -0.18                    | 0.34         | -0.05       | -0.26       | <b>0.58</b> | -0.16       | 0.05         | <b>-0.57</b> |
| <b>Hum_jl</b>      | -0.09  | -0.03 | -0.36 | -0.17 | -0.43                    | -0.10        | -0.07       | 0.21        | 0.03        | 0.49        | 0.23         | -0.14        |
| <b>Hum_aug</b>     | 0.36   | 0.27  | -0.43 | 0.04  | -0.24                    | -0.15        | -0.10       | -0.07       | 0.15        | 0.44        | 0.12         | -0.23        |
| <b>T_may</b>       | -0.22  | -0.37 | 0.01  | -0.45 | -0.02                    | -0.23        | -0.19       | <b>0.55</b> | 0.03        | 0.14        | <b>0.66</b>  | -0.04        |
| <b>T_jn</b>        | -0.15  | 0.08  | 0.17  | -0.21 | -0.23                    | 0.21         | -0.32       | 0.07        | 0.04        | 0.21        | 0.03         | -0.32        |
| <b>T_jl</b>        | -0.37  | -0.35 | 0.25  | -0.23 | 0.38                     | 0.13         | 0.14        | -0.39       | 0.39        | -0.48       | -0.36        | -0.14        |
| <b>T_aug</b>       | -0.04  | 0.05  | 0.53  | 0.23  | <b>0.68</b>              | 0.19         | <b>0.55</b> | 0.38        | -0.27       | -0.11       | -0.25        | 0.40         |
| <b>Prec_jn</b>     | -0.35  | -0.34 | 0.07  | -0.37 | -0.04                    | -0.02        | 0.08        | -0.31       | 0.49        | 0.12        | 0.04         | -0.42        |
| <b>Prec_jl</b>     | 0.08   | -0.02 | -0.46 | -0.15 | -0.51                    | -0.51        | -0.16       | 0.20        | -0.27       | 0.33        | 0.39         | 0.25         |
| <b>Prec_aug</b>    | 0.18   | 0.21  | 0.51  | -0.05 | 0.43                     | -0.02        | 0.24        | 0.20        | -0.03       | 0.21        | 0.09         | 0.02         |
| <b>Wind_my</b>     | 0.10   | -0.26 | 0.16  | 0.13  | 0.33                     | -0.06        | 0.07        | -0.21       | -0.11       | -0.22       | -0.12        | 0.28         |
| <b>Wind_jn</b>     | 0.19   | -0.16 | -0.06 | -0.15 | 0.25                     | -0.46        | 0.30        | -0.01       | 0.12        | -0.19       | 0.43         | 0.18         |
| <b>Wind_jl</b>     | 0.27   | 0.22  | -0.36 | -0.02 | -0.11                    | <b>-0.61</b> | 0.20        | 0.43        | -0.20       | -0.01       | <b>0.59</b>  | 0.36         |
| <b>Wind_aug</b>    | 0.12   | 0.12  | 0.09  | 0.06  | 0.27                     | -0.12        | 0.43        | -0.02       | 0.11        | -0.55       | -0.04        | 0.26         |

\* as in Table S1

\*\* as in Table S1

<sup>†</sup> as in Table S1

Table S17. A Spearman rho correlation matrix for Siberian larch #3 (continued 1).

| Weather par | orgP  | alcP         | hclP  | orgS         | alcS         | hclS  | orgTi       | alcTi | hclTi | orgMn        | alcMn | hclMn |
|-------------|-------|--------------|-------|--------------|--------------|-------|-------------|-------|-------|--------------|-------|-------|
| lv_jn_ind   | -0.31 | 0.40         | 0.30  | -0.33        | 0.36         | 0.01  | <b>0.55</b> | 0.08  | -0.13 | -0.29        | -0.31 | -0.27 |
| lv_jl_ind   | 0.07  | 0.09         | 0.10  | 0.01         | 0.29         | 0.40  | 0.19        | -0.32 | 0.10  | 0.03         | -0.07 | -0.16 |
| lv_au_ind   | -0.08 | <b>-0.73</b> | -0.43 | 0.35         | 0.20         | -0.16 | -0.12       | -0.20 | 0.35  | 0.25         | 0.17  | 0.24  |
| lv-Vys_jn   | -0.26 | 0.45         | 0.30  | -0.40        | 0.27         | 0.02  | 0.48        | 0.04  | -0.26 | -0.34        | -0.31 | -0.33 |
| lv-Vys_jl   | 0.18  | 0.13         | 0.19  | 0.05         | 0.30         | 0.21  | 0.33        | -0.23 | 0.06  | 0.03         | -0.05 | -0.06 |
| lv-Vys_aug  | -0.09 | <b>-0.62</b> | -0.25 | 0.17         | -0.02        | -0.12 | 0.00        | -0.15 | 0.38  | 0.00         | -0.09 | 0.27  |
| Hum_may     | 0.32  | -0.13        | 0.29  | 0.14         | <b>-0.56</b> | 0.08  | -0.05       | 0.54  | 0.03  | 0.11         | 0.12  | 0.54  |
| Hum_jn      | -0.34 | 0.47         | 0.14  | -0.34        | 0.05         | -0.22 | 0.28        | -0.04 | -0.10 | <b>-0.58</b> | -0.53 | -0.34 |
| Hum_jl      | 0.26  | 0.02         | 0.02  | 0.18         | -0.03        | -0.01 | 0.26        | 0.04  | -0.14 | -0.05        | -0.05 | 0.16  |
| Hum_aug     | 0.12  | -0.19        | 0.35  | 0.16         | 0.09         | -0.10 | 0.28        | -0.08 | 0.12  | -0.01        | -0.08 | 0.35  |
| T_may       | 0.01  | -0.09        | -0.38 | 0.00         | -0.07        | -0.24 | -0.16       | -0.42 | 0.20  | -0.31        | -0.28 | -0.24 |
| T_jn        | -0.30 | -0.37        | -0.39 | 0.26         | -0.11        | -0.28 | -0.31       | -0.23 | 0.49  | -0.21        | -0.27 | 0.01  |
| T_jl        | -0.03 | 0.13         | 0.14  | <b>-0.63</b> | -0.47        | 0.12  | 0.25        | 0.54  | -0.14 | -0.27        | -0.21 | -0.08 |
| T_aug       | 0.40  | -0.37        | -0.27 | 0.23         | -0.49        | 0.01  | -0.30       | 0.38  | 0.03  | 0.26         | 0.32  | 0.42  |
| Prec_jn     | -0.29 | 0.36         | 0.18  | -0.47        | 0.16         | 0.12  | 0.47        | 0.12  | -0.27 | -0.35        | -0.32 | -0.35 |
| Prec_jl     | 0.18  | 0.12         | 0.06  | -0.05        | 0.29         | 0.41  | 0.30        | -0.24 | 0.07  | 0.13         | 0.02  | -0.11 |
| Prec_aug    | -0.13 | <b>-0.70</b> | -0.47 | 0.15         | -0.06        | -0.19 | -0.08       | -0.02 | 0.25  | 0.09         | 0.04  | 0.27  |
| Wind_my     | 0.10  | 0.10         | 0.07  | -0.40        | 0.23         | 0.12  | 0.49        | 0.21  | -0.05 | 0.14         | 0.12  | -0.06 |
| Wind_jn     | -0.04 | 0.31         | 0.20  | -0.45        | 0.35         | 0.24  | 0.36        | -0.23 | -0.24 | -0.04        | -0.05 | -0.25 |
| Wind_jl     | 0.11  | 0.17         | 0.01  | 0.10         | 0.18         | 0.26  | -0.28       | -0.42 | -0.37 | 0.20         | 0.21  | -0.16 |
| Wind_aug    | 0.00  | 0.03         | 0.28  | -0.27        | -0.11        | 0.17  | -0.01       | 0.15  | -0.33 | 0.13         | 0.14  | 0.03  |

Table S17. A Spearman rho correlation matrix for Siberian larch #3 (continued 2).

| Weather par | orgFe | alcFe | hclFe | orgCu | alcCu | hclCu | orgZn | alcZn | hclZn |
|-------------|-------|-------|-------|-------|-------|-------|-------|-------|-------|
| lv_jn_ind   | -0.45 | -0.15 | 0.05  | 0.05  | -0.45 | -0.23 | 0.21  | 0.04  | -0.10 |
| lv_jl_ind   | -0.13 | -0.25 | -0.27 | 0.15  | 0.20  | -0.09 | -0.32 | 0.27  | -0.09 |
| lv_au_ind   | 0.22  | -0.01 | 0.09  | 0.41  | 0.48  | 0.08  | -0.16 | 0.06  | 0.27  |
| lv-Vys_jn   | -0.33 | -0.05 | -0.08 | 0.00  | -0.49 | -0.23 | 0.31  | 0.03  | -0.24 |
| lv-Vys_jl   | -0.21 | -0.38 | -0.16 | 0.14  | 0.20  | 0.13  | -0.35 | 0.21  | -0.09 |
| lv-Vys_aug  | -0.05 | -0.19 | 0.01  | 0.18  | 0.24  | -0.08 | -0.03 | 0.05  | 0.24  |
| Hum_may     | -0.23 | 0.04  | 0.16  | -0.22 | -0.04 | 0.03  | -0.26 | -0.33 | 0.32  |
| Hum_jn      | -0.40 | -0.11 | 0.17  | -0.25 | -0.74 | -0.43 | 0.47  | 0.05  | -0.14 |
| Hum_jl      | -0.49 | -0.43 | 0.17  | 0.07  | 0.10  | -0.05 | -0.26 | 0.08  | 0.10  |
| Hum_aug     | -0.09 | -0.23 | -0.06 | -0.11 | 0.15  | 0.33  | -0.37 | -0.17 | 0.13  |
| T_may       | 0.01  | -0.23 | -0.08 | 0.08  | -0.08 | -0.18 | 0.34  | 0.40  | -0.18 |
| T_jn        | -0.13 | -0.14 | 0.42  | -0.09 | -0.10 | -0.34 | -0.11 | -0.04 | 0.32  |
| T_jl        | -0.30 | -0.20 | -0.32 | -0.14 | -0.31 | -0.04 | 0.40  | -0.38 | -0.42 |
| T_aug       | 0.12  | 0.35  | 0.15  | 0.27  | 0.08  | -0.23 | 0.21  | 0.14  | 0.30  |
| Prec_jn     | -0.45 | -0.16 | -0.14 | 0.05  | -0.42 | -0.32 | 0.34  | 0.00  | -0.27 |
| Prec_jl     | -0.09 | -0.35 | -0.29 | 0.18  | 0.31  | 0.05  | -0.29 | 0.22  | -0.20 |
| Prec_aug    | 0.03  | -0.05 | 0.09  | 0.30  | 0.27  | -0.13 | 0.16  | 0.02  | 0.24  |
| Wind_my     | 0.22  | -0.07 | -0.31 | 0.24  | 0.09  | 0.35  | 0.12  | -0.26 | -0.48 |
| Wind_jn     | 0.34  | 0.16  | -0.57 | 0.05  | -0.07 | 0.05  | 0.43  | 0.18  | -0.50 |
| Wind_jl     | 0.27  | 0.18  | -0.38 | 0.00  | 0.35  | 0.06  | 0.09  | 0.54  | -0.06 |
| Wind_aug    | -0.06 | -0.03 | -0.55 | -0.02 | 0.25  | 0.30  | 0.40  | 0.29  | -0.08 |

Table S18. A Kendall tau correlation matrix for Siberian larch #3.

| Weather par        | orgCa* | alcCa | hclCa                   | orgSr | alcSr        | hclSr        | orgK  | alcK        | hclK  | orgAl        | alcAl       | hclAl        |
|--------------------|--------|-------|-------------------------|-------|--------------|--------------|-------|-------------|-------|--------------|-------------|--------------|
| <b>lv_jn_ind**</b> | -0.18  | -0.21 | 0.00                    | -0.15 | -0.18        | 0.15         | 0.03  | -0.31       | 0.26  | 0.10         | -0.15       | -0.31        |
| <b>lv_jl_ind</b>   | 0.00   | 0.03  | -0.38                   | -0.18 | -0.41        | <b>-0.44</b> | -0.21 | 0.13        | -0.08 | 0.38         | 0.33        | 0.03         |
| <b>lv_au_ind</b>   | 0.26   | 0.23  | 0.18                    | 0.08  | 0.21         | -0.13        | 0.00  | 0.13        | -0.18 | 0.33         | 0.13        | 0.13         |
| <b>lv-Vys_jn</b>   | -0.21  | -0.23 | -0.03                   | -0.23 | 0.00         | 0.03         | 0.05  | -0.28       | 0.28  | 0.08         | -0.03       | -0.33        |
| <b>lv-Vys_jl</b>   | 0.05   | -0.08 | -0.38                   | -0.08 | <b>-0.51</b> | -0.23        | -0.21 | 0.18        | -0.08 | 0.38         | 0.28        | 0.08         |
| <b>lv-Vys_aug</b>  | 0.15   | 0.18  | 0.13                    | -0.08 | 0.10         | -0.13        | 0.00  | 0.13        | -0.03 | 0.23         | 0.13        | -0.08        |
| <b>Hum_may</b>     | 0.05   | 0.18  | 0.03                    | 0.18  | 0.05         | 0.23         | 0.21  | -0.13       | 0.03  | -0.08        | -0.38       | -0.03        |
| <b>Hum_jn</b>      | -0.36  | -0.28 | 0.03                    | -0.28 | -0.10        | 0.23         | -0.05 | -0.18       | 0.38  | -0.08        | -0.03       | <b>-0.44</b> |
| <b>Hum_jl</b>      | -0.03  | -0.05 | -0.26                   | -0.10 | -0.28        | 0.00         | -0.03 | 0.15        | 0.00  | 0.31         | 0.15        | -0.05        |
| <b>Hum_aug</b>     | 0.25   | 0.22  | -0.32                   | 0.06  | -0.19        | -0.12        | -0.09 | -0.06       | 0.09  | 0.32         | 0.06        | -0.14        |
| <b>T_may</b>       | -0.15  | -0.28 | 0.13                    | -0.33 | 0.00         | -0.13        | -0.05 | <b>0.44</b> | 0.03  | 0.13         | <b>0.54</b> | -0.08        |
| <b>T_jn</b>        | -0.10  | 0.03  | 0.13                    | -0.18 | -0.10        | 0.08         | -0.21 | 0.08        | 0.08  | 0.13         | 0.03        | -0.28        |
| <b>T_jl</b>        | -0.28  | -0.26 | 0.21                    | -0.10 | 0.33         | 0.10         | 0.08  | -0.26       | 0.26  | -0.31        | -0.26       | -0.10        |
| <b>T_aug</b>       | -0.05  | 0.03  | <b>0.44<sup>†</sup></b> | 0.08  | <b>0.51</b>  | 0.18         | 0.36  | 0.28        | -0.18 | -0.08        | -0.13       | 0.28         |
| <b>Prec_jn</b>     | -0.23  | -0.21 | 0.10                    | -0.31 | 0.08         | 0.00         | 0.13  | -0.21       | 0.31  | 0.10         | 0.00        | -0.31        |
| <b>Prec_jl</b>     | 0.05   | -0.03 | -0.33                   | -0.08 | -0.41        | -0.33        | -0.10 | 0.13        | -0.23 | 0.23         | 0.28        | 0.18         |
| <b>Prec_aug</b>    | 0.10   | 0.13  | 0.38                    | -0.08 | 0.36         | -0.08        | 0.15  | 0.08        | -0.03 | 0.08         | 0.08        | -0.03        |
| <b>Wind_my</b>     | 0.08   | -0.16 | 0.13                    | 0.10  | 0.21         | -0.03        | 0.10  | -0.16       | -0.05 | -0.10        | -0.13       | 0.26         |
| <b>Wind_jn</b>     | 0.14   | -0.09 | -0.04                   | -0.01 | 0.14         | -0.30        | 0.25  | 0.01        | 0.09  | -0.14        | 0.27        | 0.14         |
| <b>Wind_jl</b>     | 0.19   | 0.17  | -0.30                   | 0.01  | -0.06        | <b>-0.45</b> | 0.14  | 0.32        | -0.12 | -0.01        | 0.35        | 0.22         |
| <b>Wind_aug</b>    | 0.06   | 0.09  | -0.01                   | 0.04  | 0.17         | -0.12        | 0.27  | -0.04       | 0.01  | <b>-0.43</b> | -0.04       | 0.19         |

\* as in Table S1

\*\* as in Table S1

<sup>†</sup> as in Table S1

Table S18. A Kendall tau correlation matrix for Siberian larch #3 (continued 1).

| Weather par | orgP  | alcP         | hclP  | orgS         | alcS         | hclS  | orgTi       | alcTi       | hclTi | orgMn | alcMn | hclMn |
|-------------|-------|--------------|-------|--------------|--------------|-------|-------------|-------------|-------|-------|-------|-------|
| lv_jn_ind   | -0.23 | 0.30         | 0.23  | -0.21        | 0.28         | -0.04 | <b>0.44</b> | 0.10        | -0.13 | -0.18 | -0.21 | -0.18 |
| lv_jl_ind   | 0.05  | 0.01         | 0.05  | 0.03         | 0.21         | 0.25  | 0.15        | -0.23       | 0.10  | 0.00  | -0.08 | -0.10 |
| lv_au_ind   | 0.00  | <b>-0.55</b> | -0.31 | 0.28         | 0.10         | -0.04 | -0.10       | -0.13       | 0.26  | 0.21  | 0.13  | 0.21  |
| lv-Vys_jn   | -0.15 | 0.32         | 0.21  | -0.23        | 0.15         | -0.01 | 0.31        | 0.08        | -0.21 | -0.21 | -0.23 | -0.15 |
| lv-Vys_jl   | 0.10  | 0.12         | 0.10  | 0.08         | 0.21         | 0.14  | 0.21        | -0.18       | 0.10  | 0.00  | -0.08 | -0.05 |
| lv-Vys_aug  | 0.00  | -0.40        | -0.21 | 0.18         | -0.05        | -0.04 | -0.05       | -0.13       | 0.26  | 0.05  | -0.03 | 0.26  |
| Hum_may     | 0.21  | -0.12        | 0.21  | 0.08         | <b>-0.46</b> | 0.09  | -0.05       | <b>0.44</b> | 0.05  | 0.10  | 0.08  | 0.36  |
| Hum_jn      | -0.26 | 0.32         | 0.10  | -0.18        | -0.05        | -0.14 | 0.21        | -0.03       | -0.05 | -0.36 | -0.33 | -0.21 |
| Hum_jl      | 0.23  | 0.04         | 0.08  | 0.15         | -0.03        | 0.01  | 0.18        | -0.05       | -0.08 | -0.03 | 0.00  | 0.18  |
| Hum_aug     | 0.12  | -0.10        | 0.19  | 0.14         | 0.09         | -0.11 | 0.30        | -0.06       | 0.06  | -0.01 | -0.04 | 0.27  |
| T_may       | 0.00  | -0.04        | -0.31 | -0.03        | 0.00         | -0.12 | -0.10       | -0.28       | 0.15  | -0.21 | -0.18 | -0.21 |
| T_jn        | -0.21 | -0.25        | -0.36 | 0.23         | -0.05        | -0.14 | -0.26       | -0.13       | 0.36  | -0.21 | -0.23 | -0.05 |
| T_jl        | -0.03 | 0.06         | 0.13  | <b>-0.46</b> | -0.33        | 0.14  | 0.18        | 0.36        | -0.08 | -0.18 | -0.10 | -0.08 |
| T_aug       | 0.26  | -0.27        | -0.26 | 0.13         | -0.31        | 0.01  | -0.21       | 0.28        | 0.00  | 0.21  | 0.23  | 0.26  |
| Prec_jn     | -0.18 | 0.19         | 0.13  | -0.31        | 0.08         | 0.12  | 0.28        | 0.15        | -0.18 | -0.18 | -0.21 | -0.23 |
| Prec_jl     | 0.15  | 0.06         | 0.05  | -0.03        | 0.15         | 0.33  | 0.21        | -0.18       | 0.05  | 0.05  | -0.03 | -0.05 |
| Prec_aug    | -0.10 | <b>-0.55</b> | -0.36 | 0.13         | -0.05        | -0.14 | -0.10       | -0.03       | 0.15  | 0.05  | -0.03 | 0.26  |
| Wind_my     | 0.03  | 0.04         | 0.03  | -0.26        | 0.18         | 0.09  | 0.36        | 0.13        | 0.00  | 0.08  | 0.05  | -0.08 |
| Wind_jn     | -0.04 | 0.23         | 0.17  | -0.30        | 0.25         | 0.21  | 0.27        | -0.17       | -0.19 | -0.01 | 0.01  | -0.19 |
| Wind_jl     | 0.06  | 0.10         | 0.01  | 0.06         | 0.09         | 0.21  | -0.19       | -0.32       | -0.27 | 0.14  | 0.17  | -0.12 |
| Wind_aug    | 0.14  | 0.03         | 0.25  | -0.22        | -0.09        | 0.11  | 0.01        | 0.14        | -0.27 | 0.12  | 0.14  | 0.06  |

Table S18. A Kendall tau correlation matrix for Siberian larch #3 (continued 2).

| Weather par | orgFe | alcFe | hclFe | orgCu | alcCu | hclCu | orgZn | alcZn | hclZn |
|-------------|-------|-------|-------|-------|-------|-------|-------|-------|-------|
| lv_jn_ind   | -0.33 | -0.13 | 0.03  | 0.05  | -0.31 | -0.26 | 0.15  | 0.00  | -0.05 |
| lv_jl_ind   | -0.10 | -0.21 | -0.21 | 0.08  | 0.13  | -0.03 | -0.23 | 0.18  | -0.08 |
| lv_au_ind   | 0.21  | 0.00  | 0.05  | 0.28  | 0.33  | 0.03  | -0.13 | 0.08  | 0.23  |
| lv-Vys_jn   | -0.21 | 0.00  | -0.05 | -0.03 | -0.38 | -0.23 | 0.23  | 0.03  | -0.13 |
| lv-Vys_jl   | -0.15 | -0.31 | -0.21 | 0.08  | 0.18  | 0.08  | -0.23 | 0.08  | -0.08 |
| lv-Vys_aug  | -0.05 | -0.10 | 0.00  | 0.13  | 0.18  | -0.13 | -0.03 | 0.03  | 0.18  |
| Hum_may     | -0.15 | 0.05  | 0.10  | -0.18 | -0.03 | 0.08  | -0.18 | -0.23 | 0.28  |
| Hum_jn      | -0.26 | -0.05 | 0.15  | -0.13 | -0.54 | -0.28 | 0.28  | 0.03  | -0.08 |
| Hum_jl      | -0.33 | -0.33 | 0.13  | 0.00  | 0.10  | -0.05 | -0.15 | 0.05  | 0.10  |
| Hum_aug     | -0.12 | -0.17 | -0.04 | -0.04 | 0.12  | 0.22  | -0.27 | -0.12 | 0.09  |
| T_may       | -0.05 | -0.21 | -0.10 | 0.08  | -0.08 | -0.08 | 0.23  | 0.28  | -0.13 |
| T_jn        | -0.10 | -0.15 | 0.31  | -0.03 | -0.08 | -0.28 | -0.08 | -0.03 | 0.28  |
| T_jl        | -0.23 | -0.13 | -0.23 | -0.10 | -0.21 | 0.00  | 0.21  | -0.31 | -0.36 |
| T_aug       | 0.05  | 0.26  | 0.10  | 0.18  | 0.13  | -0.18 | 0.18  | 0.08  | 0.18  |
| Prec_jn     | -0.33 | -0.08 | -0.08 | 0.05  | -0.26 | -0.26 | 0.26  | 0.00  | -0.15 |
| Prec_jl     | -0.05 | -0.26 | -0.21 | 0.13  | 0.23  | 0.03  | -0.28 | 0.13  | -0.18 |
| Prec_aug    | 0.00  | -0.05 | 0.05  | 0.18  | 0.18  | -0.18 | 0.08  | 0.03  | 0.23  |
| Wind_my     | 0.13  | -0.03 | -0.18 | 0.21  | 0.05  | 0.29  | 0.16  | -0.18 | -0.31 |
| Wind_jn     | 0.22  | 0.09  | -0.43 | 0.06  | -0.04 | 0.04  | 0.32  | 0.12  | -0.35 |
| Wind_jl     | 0.25  | 0.19  | -0.22 | 0.01  | 0.27  | 0.06  | 0.12  | 0.37  | -0.04 |
| Wind_aug    | -0.04 | -0.04 | -0.40 | -0.01 | 0.14  | 0.22  | 0.30  | 0.22  | -0.06 |

Table S19. A Spearman rho correlation matrix for Scots pine #1.

| Weather par | orgCa*                  | alcCa       | hclCa | orgSr | alcSr        | hclSr        | orgK  | alcK  | hclK  | orgAl       | alcAl       | hclAl |
|-------------|-------------------------|-------------|-------|-------|--------------|--------------|-------|-------|-------|-------------|-------------|-------|
| lv_jn_ind** | 0.42                    | 0.25        | -0.02 | -0.39 | -0.25        | <b>-0.62</b> | -0.28 | -0.12 | -0.24 | -0.09       | -0.15       | 0.23  |
| lv_jl_ind   | -0.42                   | -0.47       | -0.29 | -0.24 | -0.05        | -0.15        | -0.11 | -0.03 | -0.13 | 0.45        | 0.14        | -0.02 |
| lv_au_ind   | -0.47                   | -0.15       | -0.04 | 0.27  | 0.29         | -0.25        | 0.19  | 0.27  | 0.10  | 0.29        | -0.11       | -0.12 |
| lv-Vys_jn   | 0.47                    | 0.30        | -0.07 | -0.36 | -0.08        | <b>-0.61</b> | -0.16 | -0.09 | -0.22 | -0.13       | -0.13       | 0.17  |
| lv-Vys_jl   | -0.36                   | -0.45       | -0.32 | -0.33 | -0.07        | -0.18        | -0.13 | -0.09 | -0.19 | 0.51        | 0.01        | 0.08  |
| lv-Vys_aug  | -0.38                   | -0.09       | -0.23 | 0.11  | 0.14         | -0.36        | -0.09 | -0.01 | 0.19  | 0.34        | -0.14       | -0.02 |
| Hum_may     | -0.09                   | -0.23       | 0.09  | -0.16 | <b>-0.59</b> | -0.02        | -0.11 | -0.16 | 0.24  | 0.19        | -0.19       | 0.49  |
| Hum_jn      | <b>0.66<sup>†</sup></b> | <b>0.57</b> | -0.27 | -0.29 | 0.05         | -0.42        | -0.42 | -0.39 | -0.15 | -0.43       | -0.30       | -0.03 |
| Hum_jl      | -0.29                   | -0.35       | -0.44 | -0.32 | -0.05        | -0.31        | -0.20 | -0.29 | -0.07 | 0.29        | -0.41       | 0.04  |
| Hum_aug     | -0.37                   | -0.34       | -0.42 | -0.48 | -0.07        | -0.51        | -0.25 | -0.28 | -0.02 | <b>0.62</b> | -0.16       | 0.38  |
| T_may       | 0.07                    | 0.26        | -0.40 | 0.23  | <b>0.59</b>  | 0.09         | 0.03  | -0.07 | -0.06 | -0.07       | -0.12       | -0.52 |
| T_jn        | -0.03                   | 0.12        | -0.40 | 0.02  | 0.25         | -0.10        | -0.41 | -0.27 | 0.03  | -0.13       | -0.29       | -0.20 |
| T_jl        | 0.42                    | 0.27        | 0.21  | 0.09  | -0.19        | -0.11        | -0.02 | 0.10  | 0.24  | -0.02       | 0.17        | 0.34  |
| T_aug       | -0.03                   | 0.10        | 0.40  | 0.54  | -0.23        | 0.21         | 0.52  | 0.34  | 0.34  | -0.19       | -0.23       | -0.04 |
| Prec_jn     | 0.40                    | 0.24        | -0.05 | -0.27 | -0.08        | <b>-0.60</b> | -0.18 | -0.05 | -0.14 | -0.09       | -0.08       | 0.14  |
| Prec_jl     | -0.47                   | -0.47       | -0.16 | -0.06 | -0.10        | 0.08         | -0.05 | 0.03  | 0.02  | 0.42        | 0.21        | -0.01 |
| Prec_aug    | -0.27                   | 0.09        | 0.02  | 0.38  | 0.20         | -0.26        | 0.11  | 0.17  | 0.28  | 0.08        | -0.16       | -0.13 |
| Wind_my     | 0.09                    | 0.10        | 0.33  | 0.26  | -0.05        | -0.04        | 0.29  | 0.42  | 0.23  | 0.11        | 0.25        | 0.31  |
| Wind_jn     | 0.08                    | 0.20        | 0.16  | 0.16  | 0.10         | -0.05        | 0.25  | 0.19  | 0.14  | -0.03       | 0.37        | -0.03 |
| Wind_jl     | -0.34                   | -0.26       | 0.07  | 0.09  | 0.20         | 0.50         | 0.29  | 0.02  | -0.16 | 0.01        | 0.39        | -0.53 |
| Wind_aug    | -0.04                   | -0.04       | 0.53  | 0.08  | -0.24        | 0.34         | 0.25  | 0.15  | -0.10 | 0.20        | <b>0.58</b> | -0.09 |

\* as in Table S1

\*\* as in Table S1

<sup>†</sup> as in Table S1

Table S19. A Spearman rho correlation matrix for Scots pine #1 (continued 1).

| Weather par | orgP  | alcP         | hclP         | orgS         | alcS  | hclS        | orgTi        | alcTi        | hclTi | orgMn       | alcMn       | hclMn       |
|-------------|-------|--------------|--------------|--------------|-------|-------------|--------------|--------------|-------|-------------|-------------|-------------|
| Iv_jn_ind   | 0.24  | 0.29         | 0.49         | 0.32         | -0.04 | 0.13        | -0.30        | -0.21        | -0.47 | <b>0.59</b> | 0.47        | -0.07       |
| Iv_jl_ind   | 0.12  | <b>-0.59</b> | -0.05        | 0.29         | -0.46 | 0.30        | <b>-0.62</b> | <b>-0.81</b> | -0.10 | -0.33       | -0.41       | -0.29       |
| Iv_au_ind   | 0.14  | -0.01        | -0.13        | -0.20        | -0.05 | -0.11       | -0.02        | -0.34        | 0.20  | -0.34       | -0.44       | -0.05       |
| Iv-Vys_jn   | 0.19  | 0.27         | 0.34         | 0.39         | -0.12 | -0.01       | -0.48        | -0.24        | -0.43 | <b>0.58</b> | 0.48        | -0.10       |
| Iv-Vys_jl   | 0.27  | <b>-0.57</b> | 0.03         | 0.42         | -0.46 | 0.40        | -0.44        | <b>-0.77</b> | -0.05 | -0.25       | -0.30       | -0.28       |
| Iv-Vys_aug  | 0.12  | -0.12        | 0.11         | -0.16        | -0.03 | 0.11        | -0.27        | -0.47        | 0.23  | -0.20       | -0.34       | -0.14       |
| Hum_may     | -0.08 | 0.08         | 0.41         | -0.18        | 0.13  | <b>0.58</b> | -0.09        | 0.23         | -0.05 | -0.07       | -0.13       | 0.22        |
| Hum_jn      | 0.09  | 0.24         | 0.34         | 0.10         | 0.12  | -0.24       | -0.24        | 0.03         | -0.27 | <b>0.73</b> | <b>0.70</b> | -0.16       |
| Hum_jl      | 0.38  | -0.35        | 0.09         | 0.29         | -0.53 | 0.37        | <b>-0.63</b> | -0.53        | -0.08 | -0.13       | -0.25       | -0.25       |
| Hum_aug     | 0.42  | -0.18        | 0.45         | 0.25         | -0.35 | 0.50        | -0.33        | <b>-0.68</b> | 0.29  | -0.19       | -0.37       | -0.29       |
| T_may       | -0.05 | -0.45        | -0.51        | 0.07         | 0.02  | -0.47       | -0.23        | -0.30        | 0.16  | 0.00        | 0.17        | -0.24       |
| T_jn        | 0.13  | -0.02        | 0.08         | <b>-0.57</b> | 0.24  | -0.25       | 0.03         | -0.02        | 0.12  | 0.04        | -0.10       | -0.32       |
| T_jl        | -0.12 | 0.26         | 0.20         | -0.06        | 0.34  | 0.30        | -0.27        | 0.15         | -0.23 | 0.42        | 0.27        | -0.01       |
| T_aug       | -0.53 | 0.03         | -0.31        | -0.19        | 0.27  | -0.09       | -0.02        | 0.43         | -0.18 | -0.13       | 0.14        | <b>0.64</b> |
| Prec_jn     | 0.19  | 0.26         | 0.29         | 0.31         | -0.14 | 0.07        | <b>-0.66</b> | -0.28        | -0.48 | 0.53        | 0.35        | -0.16       |
| Prec_jl     | 0.02  | <b>-0.65</b> | -0.09        | 0.25         | -0.41 | 0.40        | -0.32        | <b>-0.70</b> | 0.01  | -0.38       | -0.40       | -0.18       |
| Prec_aug    | 0.00  | 0.15         | -0.03        | -0.29        | 0.09  | -0.10       | -0.09        | -0.12        | 0.18  | -0.13       | -0.23       | 0.05        |
| Wind_my     | -0.15 | 0.04         | 0.06         | 0.05         | 0.14  | 0.22        | 0.23         | -0.14        | -0.05 | 0.12        | 0.11        | 0.13        |
| Wind_jn     | -0.32 | -0.09        | -0.09        | 0.39         | -0.18 | -0.09       | -0.10        | -0.31        | 0.11  | 0.05        | 0.21        | 0.16        |
| Wind_jl     | -0.15 | -0.31        | <b>-0.57</b> | 0.48         | -0.50 | -0.25       | -0.04        | -0.02        | 0.28  | -0.51       | -0.24       | 0.13        |
| Wind_aug    | -0.09 | 0.17         | -0.11        | <b>0.56</b>  | 0.00  | 0.20        | 0.20         | 0.33         | 0.15  | -0.12       | 0.06        | 0.36        |

Table S19. A Spearman rho correlation matrix for Scots pine #1 (continued 2).

| Weather par | orgFe        | alcFe | hclFe | orgCu       | alcCu | hclCu       | orgZn        | alcZn       | hclZn       |
|-------------|--------------|-------|-------|-------------|-------|-------------|--------------|-------------|-------------|
| lv_jn_ind   | -0.12        | 0.01  | 0.12  | -0.05       | -0.01 | 0.20        | <b>0.55</b>  | 0.33        | <b>0.59</b> |
| lv_jl_ind   | -0.37        | -0.21 | -0.18 | <b>0.61</b> | -0.37 | 0.54        | 0.51         | -0.20       | 0.10        |
| lv_au_ind   | -0.07        | 0.25  | 0.01  | 0.08        | 0.12  | 0.47        | -0.33        | -0.46       | 0.09        |
| lv-Vys_jn   | -0.11        | -0.08 | 0.15  | -0.12       | -0.19 | 0.16        | 0.54         | 0.30        | 0.44        |
| lv-Vys_jl   | -0.50        | -0.26 | -0.31 | <b>0.66</b> | -0.32 | <b>0.56</b> | <b>0.60</b>  | -0.18       | 0.13        |
| lv-Vys_aug  | -0.09        | 0.10  | -0.18 | 0.16        | 0.16  | 0.40        | -0.20        | -0.52       | 0.11        |
| Hum_may     | -0.27        | -0.52 | -0.23 | 0.13        | 0.47  | -0.13       | -0.20        | 0.11        | 0.07        |
| Hum_jn      | 0.05         | 0.08  | 0.10  | -0.30       | -0.19 | -0.12       | 0.35         | 0.11        | 0.29        |
| Hum_jl      | -0.53        | -0.38 | -0.27 | 0.37        | -0.21 | 0.34        | 0.50         | -0.30       | 0.05        |
| Hum_aug     | <b>-0.61</b> | -0.50 | -0.50 | <b>0.69</b> | -0.09 | <b>0.58</b> | 0.29         | -0.28       | 0.34        |
| T_may       | 0.07         | 0.29  | -0.09 | -0.11       | -0.41 | 0.09        | 0.01         | -0.49       | -0.41       |
| T_jn        | -0.01        | 0.29  | 0.11  | -0.02       | 0.02  | 0.15        | -0.25        | -0.53       | 0.07        |
| T_jl        | 0.27         | 0.11  | 0.32  | -0.42       | 0.42  | -0.29       | -0.08        | 0.15        | -0.19       |
| T_aug       | 0.13         | -0.06 | -0.04 | -0.49       | 0.41  | -0.29       | <b>-0.62</b> | 0.08        | -0.29       |
| Prec_jn     | -0.02        | -0.01 | 0.27  | -0.19       | -0.10 | 0.13        | 0.51         | 0.21        | 0.34        |
| Prec_jl     | -0.23        | -0.07 | -0.23 | 0.54        | -0.21 | 0.38        | 0.41         | -0.20       | -0.04       |
| Prec_aug    | 0.19         | 0.32  | 0.04  | -0.25       | 0.32  | 0.14        | -0.46        | -0.42       | 0.00        |
| Wind_my     | 0.12         | 0.31  | 0.18  | -0.14       | 0.28  | 0.10        | -0.09        | 0.09        | 0.00        |
| Wind_jn     | 0.26         | 0.07  | -0.11 | -0.06       | -0.22 | -0.04       | 0.12         | 0.19        | -0.01       |
| Wind_jl     | 0.25         | -0.19 | -0.29 | 0.18        | -0.51 | -0.27       | 0.21         | 0.20        | -0.37       |
| Wind_aug    | 0.52         | -0.08 | -0.25 | -0.09       | 0.27  | -0.51       | 0.09         | <b>0.59</b> | -0.23       |

Table S20. A Kendall tau correlation matrix for Scots pine #1.

| Weather par        | orgCa*                  | alcCa | hclCa       | orgSr        | alcSr        | hclSr        | orgK  | alcK  | hclK  | orgAl       | alcAl | hclAl        |
|--------------------|-------------------------|-------|-------------|--------------|--------------|--------------|-------|-------|-------|-------------|-------|--------------|
| <b>lv_jn_ind**</b> | 0.28                    | 0.18  | -0.03       | -0.31        | -0.21        | -0.49        | -0.18 | -0.08 | -0.13 | -0.10       | -0.10 | 0.21         |
| <b>lv_jl_ind</b>   | -0.31                   | -0.36 | -0.26       | -0.18        | -0.03        | -0.10        | -0.10 | -0.05 | -0.10 | 0.33        | 0.08  | -0.03        |
| <b>lv_au_ind</b>   | -0.36                   | -0.10 | 0.00        | 0.23         | 0.18         | -0.15        | 0.15  | 0.21  | 0.05  | 0.18        | -0.13 | -0.08        |
| <b>lv-Vys_jn</b>   | 0.31                    | 0.21  | -0.05       | -0.28        | -0.08        | <b>-0.46</b> | -0.10 | -0.05 | -0.15 | -0.13       | -0.13 | 0.13         |
| <b>lv-Vys_jl</b>   | -0.31                   | -0.31 | -0.26       | -0.18        | -0.08        | -0.10        | -0.10 | -0.10 | -0.15 | 0.38        | 0.03  | 0.08         |
| <b>lv-Vys_aug</b>  | -0.31                   | -0.05 | -0.10       | 0.08         | 0.13         | -0.26        | -0.05 | 0.00  | 0.10  | 0.23        | -0.13 | -0.03        |
| <b>Hum_may</b>     | -0.10                   | -0.21 | 0.00        | -0.08        | <b>-0.44</b> | 0.00         | -0.10 | -0.10 | 0.15  | 0.13        | -0.13 | 0.33         |
| <b>Hum_jn</b>      | <b>0.46<sup>†</sup></b> | 0.36  | -0.21       | -0.23        | 0.03         | -0.31        | -0.31 | -0.26 | -0.10 | -0.33       | -0.23 | 0.03         |
| <b>Hum_jl</b>      | -0.23                   | -0.18 | -0.28       | -0.21        | -0.05        | -0.23        | -0.13 | -0.23 | -0.08 | 0.21        | -0.31 | 0.10         |
| <b>Hum_aug</b>     | -0.25                   | -0.25 | -0.27       | <b>-0.43</b> | -0.04        | -0.40        | -0.22 | -0.17 | -0.09 | <b>0.48</b> | -0.14 | 0.32         |
| <b>T_may</b>       | 0.00                    | 0.15  | -0.26       | 0.13         | <b>0.44</b>  | 0.05         | 0.05  | 0.00  | -0.05 | -0.03       | -0.03 | <b>-0.44</b> |
| <b>T_jn</b>        | -0.05                   | 0.10  | -0.36       | -0.03        | 0.23         | -0.05        | -0.31 | -0.15 | 0.00  | -0.08       | -0.18 | -0.13        |
| <b>T_jl</b>        | 0.28                    | 0.18  | 0.18        | 0.00         | -0.15        | -0.08        | -0.03 | 0.08  | 0.18  | 0.00        | 0.15  | 0.26         |
| <b>T_aug</b>       | -0.10                   | 0.05  | 0.31        | 0.38         | -0.18        | 0.15         | 0.36  | 0.26  | 0.15  | -0.08       | -0.18 | -0.03        |
| <b>Prec_jn</b>     | 0.13                    | 0.13  | -0.03       | -0.21        | -0.10        | <b>-0.44</b> | -0.08 | -0.03 | -0.13 | -0.15       | -0.05 | 0.10         |
| <b>Prec_jl</b>     | -0.31                   | -0.36 | -0.15       | -0.03        | -0.08        | 0.05         | -0.05 | 0.00  | 0.00  | 0.33        | 0.13  | 0.03         |
| <b>Prec_aug</b>    | -0.21                   | 0.05  | 0.00        | 0.28         | 0.18         | -0.15        | 0.10  | 0.15  | 0.21  | 0.08        | -0.13 | -0.13        |
| <b>Wind_my</b>     | 0.03                    | 0.08  | 0.26        | 0.26         | -0.05        | -0.03        | 0.21  | 0.31  | 0.16  | 0.05        | 0.21  | 0.23         |
| <b>Wind_jn</b>     | 0.12                    | 0.14  | 0.17        | 0.17         | 0.06         | -0.04        | 0.19  | 0.09  | 0.17  | -0.01       | 0.30  | -0.01        |
| <b>Wind_jl</b>     | -0.30                   | -0.22 | 0.04        | 0.06         | 0.17         | 0.35         | 0.19  | -0.01 | -0.14 | -0.01       | 0.22  | -0.37        |
| <b>Wind_aug</b>    | 0.01                    | 0.01  | <b>0.43</b> | 0.04         | -0.19        | 0.25         | 0.22  | 0.12  | -0.04 | 0.12        | 0.37  | -0.12        |

\* as in Table S1

\*\* as in Table S1

<sup>†</sup> as in Table S1

Table S20. A Kendall tau correlation matrix for Scots pine #1 (continued 1).

| Weather par | orgP  | alcP         | hclP         | orgS  | alcS         | hclS  | orgTi        | alcTi        | hclTi | orgMn       | alcMn       | hclMn       |
|-------------|-------|--------------|--------------|-------|--------------|-------|--------------|--------------|-------|-------------|-------------|-------------|
| lv_jn_ind   | 0.15  | 0.21         | 0.33         | 0.23  | -0.03        | 0.08  | -0.21        | -0.13        | -0.36 | <b>0.44</b> | 0.38        | -0.03       |
| lv_jl_ind   | 0.08  | <b>-0.49</b> | 0.00         | 0.21  | -0.31        | 0.21  | <b>-0.44</b> | <b>-0.62</b> | -0.08 | -0.31       | -0.31       | -0.26       |
| lv_au_ind   | 0.08  | 0.08         | -0.05        | -0.05 | -0.05        | -0.05 | -0.03        | -0.26        | 0.13  | -0.26       | -0.31       | 0.00        |
| lv-Vys_jn   | 0.13  | 0.18         | 0.21         | 0.31  | -0.05        | 0.00  | -0.28        | -0.10        | -0.33 | 0.41        | 0.41        | -0.05       |
| lv-Vys_jl   | 0.18  | <b>-0.49</b> | 0.00         | 0.36  | -0.26        | 0.31  | -0.33        | <b>-0.56</b> | -0.08 | -0.26       | -0.21       | -0.21       |
| lv-Vys_aug  | 0.08  | -0.13        | 0.10         | -0.10 | 0.00         | 0.10  | -0.23        | -0.36        | 0.13  | -0.15       | -0.21       | -0.10       |
| Hum_may     | -0.08 | 0.03         | 0.31         | -0.15 | 0.10         | 0.41  | -0.03        | 0.15         | -0.03 | -0.10       | -0.10       | 0.21        |
| Hum_jn      | 0.03  | 0.18         | 0.21         | 0.05  | 0.10         | -0.15 | -0.13        | 0.05         | -0.18 | <b>0.56</b> | <b>0.51</b> | -0.10       |
| Hum_jl      | 0.31  | -0.26        | 0.08         | 0.18  | -0.38        | 0.38  | <b>-0.46</b> | -0.33        | -0.05 | -0.13       | -0.13       | -0.18       |
| Hum_aug     | 0.32  | -0.09        | 0.32         | 0.19  | -0.25        | 0.40  | -0.22        | <b>-0.50</b> | 0.19  | -0.14       | -0.25       | -0.19       |
| T_may       | -0.03 | -0.28        | -0.31        | 0.05  | 0.00         | -0.36 | -0.23        | -0.26        | 0.13  | 0.00        | 0.15        | -0.10       |
| T_jn        | 0.08  | -0.03        | 0.05         | -0.41 | 0.15         | -0.15 | 0.03         | 0.00         | 0.08  | 0.05        | -0.05       | -0.26       |
| T_jl        | -0.10 | 0.21         | 0.18         | -0.08 | 0.23         | 0.23  | -0.21        | 0.13         | -0.10 | 0.33        | 0.18        | -0.03       |
| T_aug       | -0.38 | 0.08         | -0.21        | -0.05 | 0.21         | -0.05 | -0.03        | 0.26         | -0.18 | -0.10       | 0.05        | <b>0.46</b> |
| Prec_jn     | 0.10  | 0.21         | 0.13         | 0.23  | -0.13        | 0.08  | <b>-0.46</b> | -0.18        | -0.36 | 0.33        | 0.23        | -0.08       |
| Prec_jl     | -0.03 | <b>-0.54</b> | -0.05        | 0.15  | -0.31        | 0.31  | -0.18        | <b>-0.46</b> | 0.03  | -0.31       | -0.26       | -0.15       |
| Prec_aug    | -0.03 | 0.08         | 0.00         | -0.21 | 0.05         | -0.05 | -0.03        | -0.05        | 0.08  | -0.10       | -0.15       | 0.05        |
| Wind_my     | -0.13 | 0.08         | 0.05         | 0.05  | 0.08         | 0.16  | 0.16         | -0.10        | -0.05 | 0.08        | 0.08        | 0.10        |
| Wind_jn     | -0.25 | -0.09        | -0.04        | 0.25  | -0.14        | -0.04 | -0.09        | -0.22        | 0.09  | 0.04        | 0.19        | 0.14        |
| Wind_jl     | -0.14 | -0.25        | <b>-0.45</b> | 0.37  | <b>-0.43</b> | -0.14 | 0.01         | -0.01        | 0.22  | -0.40       | -0.19       | 0.04        |
| Wind_aug    | -0.04 | 0.14         | -0.04        | 0.40  | 0.01         | 0.09  | 0.14         | 0.27         | 0.06  | -0.04       | 0.12        | 0.17        |

Table S20. A Kendall tau correlation matrix for Scots pine #1 (continued 2).

| Weather par | orgFe        | alcFe | hclFe | orgCu       | alcCu | hclCu       | orgZn        | alcZn       | hclZn |
|-------------|--------------|-------|-------|-------------|-------|-------------|--------------|-------------|-------|
| lv_jn_ind   | -0.05        | 0.03  | 0.05  | -0.05       | -0.03 | 0.13        | <b>0.49</b>  | 0.21        | 0.41  |
| lv_jl_ind   | -0.28        | -0.10 | -0.13 | <b>0.49</b> | -0.21 | 0.41        | 0.36         | -0.13       | 0.13  |
| lv_au_ind   | -0.08        | 0.21  | -0.08 | 0.08        | 0.05  | 0.31        | -0.26        | -0.33       | 0.08  |
| lv-Vys_jn   | -0.08        | 0.00  | 0.08  | -0.08       | -0.21 | 0.10        | <b>0.46</b>  | 0.23        | 0.33  |
| lv-Vys_jl   | -0.33        | -0.21 | -0.23 | <b>0.49</b> | -0.21 | <b>0.46</b> | <b>0.46</b>  | -0.13       | 0.13  |
| lv-Vys_aug  | -0.08        | 0.10  | -0.13 | 0.08        | 0.10  | 0.31        | -0.10        | -0.38       | 0.08  |
| Hum_may     | -0.18        | -0.36 | -0.13 | 0.08        | 0.36  | -0.05       | -0.15        | 0.03        | -0.03 |
| Hum_jn      | 0.03         | 0.05  | 0.03  | -0.18       | -0.21 | -0.05       | 0.26         | 0.08        | 0.18  |
| Hum_jl      | -0.36        | -0.28 | -0.15 | 0.26        | -0.18 | 0.28        | 0.38         | -0.21       | 0.10  |
| Hum_aug     | <b>-0.43</b> | -0.30 | -0.40 | <b>0.53</b> | -0.04 | 0.40        | 0.25         | -0.19       | 0.27  |
| T_may       | 0.08         | 0.21  | -0.08 | -0.08       | -0.26 | 0.10        | 0.05         | -0.38       | -0.28 |
| T_jn        | 0.03         | 0.26  | 0.08  | -0.08       | 0.05  | 0.10        | -0.15        | -0.38       | 0.03  |
| T_jl        | 0.15         | 0.08  | 0.21  | -0.31       | 0.33  | -0.18       | -0.08        | 0.10        | -0.10 |
| T_aug       | 0.13         | 0.00  | -0.03 | -0.28       | 0.36  | -0.21       | <b>-0.46</b> | 0.03        | -0.18 |
| Prec_jn     | 0.05         | 0.08  | 0.21  | -0.15       | -0.08 | 0.08        | 0.38         | 0.15        | 0.21  |
| Prec_jl     | -0.18        | -0.05 | -0.18 | <b>0.49</b> | -0.15 | 0.31        | 0.31         | -0.13       | -0.03 |
| Prec_aug    | 0.13         | 0.31  | 0.03  | -0.13       | 0.21  | 0.10        | -0.31        | -0.28       | -0.03 |
| Wind_my     | 0.10         | 0.21  | 0.16  | -0.13       | 0.26  | 0.05        | -0.13        | 0.03        | 0.00  |
| Wind_jn     | 0.22         | -0.06 | -0.04 | -0.06       | -0.14 | -0.01       | 0.09         | 0.09        | -0.04 |
| Wind_jl     | 0.17         | -0.12 | -0.25 | 0.14        | -0.37 | -0.19       | 0.12         | 0.12        | -0.30 |
| Wind_aug    | 0.40         | -0.04 | -0.17 | -0.04       | 0.17  | -0.37       | 0.09         | <b>0.45</b> | -0.12 |

Table S21. A Spearman rho correlation matrix for Scots pine #2.

| Weather par | orgCa* | alcCa                   | hclCa | orgSr        | alcSr        | hclSr | orgK  | alcK  | hclK        | orgAl        | alcAl | hclAl       |
|-------------|--------|-------------------------|-------|--------------|--------------|-------|-------|-------|-------------|--------------|-------|-------------|
| lv_jn_ind** | 0.26   | 0.20                    | 0.40  | 0.40         | 0.36         | -0.03 | 0.05  | -0.11 | 0.13        | <b>-0.69</b> | -0.15 | 0.29        |
| lv_jl_ind   | -0.41  | -0.26                   | -0.24 | <b>-0.57</b> | <b>-0.62</b> | -0.02 | -0.14 | -0.08 | <b>0.59</b> | 0.00         | 0.47  | 0.47        |
| lv_au_ind   | -0.07  | -0.20                   | -0.13 | -0.32        | -0.25        | 0.41  | 0.05  | -0.15 | 0.30        | 0.15         | -0.03 | 0.34        |
| lv-Vys_jn   | 0.25   | 0.18                    | 0.32  | 0.43         | 0.30         | -0.10 | -0.07 | -0.22 | 0.11        | -0.54        | -0.14 | 0.27        |
| lv-Vys_jl   | -0.37  | -0.27                   | -0.35 | <b>-0.58</b> | <b>-0.63</b> | -0.10 | 0.01  | 0.03  | 0.52        | -0.23        | 0.45  | 0.54        |
| lv-Vys_aug  | -0.02  | 0.01                    | -0.26 | -0.25        | -0.21        | 0.42  | 0.01  | -0.04 | 0.37        | -0.05        | 0.24  | 0.46        |
| Hum_may     | -0.26  | -0.05                   | -0.21 | -0.03        | 0.01         | -0.34 | 0.21  | 0.32  | -0.37       | -0.18        | 0.45  | 0.02        |
| Hum_jn      | 0.46   | 0.37                    | 0.19  | <b>0.63</b>  | 0.42         | -0.02 | -0.17 | -0.19 | -0.07       | -0.51        | -0.31 | 0.07        |
| Hum_jl      | -0.42  | -0.36                   | -0.54 | -0.26        | -0.40        | -0.24 | 0.04  | -0.05 | 0.25        | -0.44        | 0.44  | <b>0.66</b> |
| Hum_aug     | -0.32  | -0.28                   | -0.50 | <b>-0.59</b> | <b>-0.56</b> | -0.11 | 0.02  | -0.02 | 0.39        | -0.38        | 0.51  | <b>0.82</b> |
| T_may       | 0.23   | 0.19                    | -0.36 | 0.05         | -0.24        | 0.33  | -0.18 | -0.07 | 0.19        | 0.21         | -0.14 | -0.04       |
| T_jn        | 0.05   | 0.01                    | -0.16 | -0.05        | -0.09        | 0.18  | -0.32 | -0.27 | 0.04        | 0.00         | -0.19 | 0.13        |
| T_jl        | 0.30   | <b>0.55<sup>†</sup></b> | 0.25  | 0.47         | 0.54         | -0.08 | -0.10 | 0.07  | -0.15       | -0.31        | 0.16  | -0.16       |
| T_aug       | 0.09   | 0.09                    | -0.05 | 0.40         | 0.21         | 0.14  | 0.44  | 0.39  | -0.49       | 0.37         | 0.00  | -0.53       |
| Prec_jn     | 0.20   | 0.22                    | 0.34  | 0.46         | 0.37         | -0.07 | -0.14 | -0.27 | 0.17        | <b>-0.55</b> | -0.03 | 0.31        |
| Prec_jl     | -0.35  | -0.17                   | -0.25 | <b>-0.59</b> | -0.54        | 0.05  | 0.00  | 0.10  | <b>0.61</b> | 0.01         | 0.52  | 0.34        |
| Prec_aug    | 0.14   | 0.08                    | -0.05 | 0.07         | 0.13         | 0.52  | 0.09  | -0.07 | 0.16        | 0.04         | 0.00  | 0.20        |
| Wind_my     | 0.27   | 0.26                    | 0.25  | -0.01        | 0.16         | 0.12  | 0.14  | 0.10  | 0.22        | -0.10        | 0.03  | -0.07       |
| Wind_jn     | 0.29   | 0.27                    | 0.19  | 0.08         | 0.09         | 0.31  | 0.06  | 0.06  | 0.39        | 0.18         | 0.09  | -0.05       |
| Wind_jl     | -0.27  | -0.25                   | -0.10 | -0.21        | -0.22        | 0.13  | 0.09  | 0.12  | 0.14        | <b>0.56</b>  | 0.12  | -0.17       |
| Wind_aug    | 0.10   | 0.31                    | 0.33  | 0.22         | 0.45         | 0.28  | 0.43  | 0.53  | -0.14       | 0.05         | 0.17  | -0.34       |

\* as in Table S1

\*\* as in Table S1

<sup>†</sup> as in Table S1

Table S21. A Spearman rho correlation matrix for Scots pine #2 (continued 1).

| Weather par | orgP  | alcP  | hclP  | orgS  | alcS        | hclS  | orgTi | alcTi | hclTi | orgMn | alcMn       | hclMn |
|-------------|-------|-------|-------|-------|-------------|-------|-------|-------|-------|-------|-------------|-------|
| lv_jn_ind   | 0.02  | -0.31 | 0.15  | -0.14 | 0.07        | 0.04  | 0.26  | 0.22  | -0.18 | -0.15 | -0.13       | 0.25  |
| lv_jl_ind   | 0.24  | 0.48  | 0.39  | -0.24 | <b>0.57</b> | 0.21  | 0.46  | 0.01  | -0.17 | -0.23 | 0.05        | 0.28  |
| lv_au_ind   | 0.18  | -0.07 | 0.03  | 0.26  | <b>0.62</b> | -0.05 | 0.44  | -0.37 | -0.24 | 0.44  | <b>0.65</b> | -0.19 |
| lv-Vys_jn   | 0.01  | -0.38 | 0.17  | -0.31 | 0.01        | -0.19 | 0.27  | 0.10  | -0.07 | -0.13 | -0.18       | 0.21  |
| lv-Vys_jl   | 0.26  | 0.55  | 0.44  | -0.19 | <b>0.60</b> | 0.16  | 0.34  | 0.07  | 0.02  | -0.28 | 0.04        | 0.24  |
| lv-Vys_aug  | 0.18  | -0.12 | 0.05  | 0.13  | <b>0.58</b> | -0.07 | 0.30  | -0.28 | -0.10 | 0.29  | 0.54        | -0.12 |
| Hum_may     | 0.37  | 0.14  | -0.22 | 0.22  | -0.13       | 0.17  | -0.22 | 0.41  | 0.14  | -0.03 | -0.09       | 0.13  |
| Hum_jn      | -0.34 | -0.43 | -0.01 | -0.43 | -0.32       | -0.30 | -0.01 | 0.03  | 0.03  | -0.31 | -0.34       | -0.03 |
| Hum_jl      | 0.24  | 0.39  | 0.41  | -0.34 | 0.45        | -0.01 | 0.32  | -0.04 | 0.18  | -0.44 | -0.17       | -0.03 |
| Hum_aug     | 0.44  | 0.26  | 0.13  | -0.04 | <b>0.64</b> | 0.01  | 0.21  | -0.13 | 0.19  | 0.01  | 0.36        | 0.23  |
| T_may       | -0.35 | -0.04 | 0.17  | -0.35 | 0.14        | -0.51 | 0.07  | -0.30 | 0.17  | -0.10 | 0.03        | -0.45 |
| T_jn        | -0.30 | 0.00  | -0.07 | -0.07 | 0.04        | -0.10 | 0.09  | -0.23 | -0.14 | -0.15 | 0.10        | -0.27 |
| T_jl        | -0.01 | -0.51 | 0.27  | 0.09  | -0.32       | -0.29 | -0.37 | 0.28  | 0.38  | 0.08  | -0.29       | 0.11  |
| T_aug       | 0.19  | -0.21 | -0.39 | 0.23  | -0.20       | -0.16 | 0.03  | 0.25  | -0.12 | 0.38  | 0.11        | -0.32 |
| Prec_jn     | 0.02  | -0.43 | 0.32  | -0.29 | 0.04        | -0.17 | 0.30  | 0.07  | -0.05 | -0.15 | -0.24       | 0.19  |
| Prec_jl     | 0.20  | 0.53  | 0.44  | -0.13 | 0.46        | 0.30  | 0.24  | 0.05  | -0.06 | -0.18 | 0.03        | 0.30  |
| Prec_aug    | 0.08  | -0.39 | -0.04 | 0.24  | 0.36        | -0.13 | 0.25  | -0.35 | -0.14 | 0.45  | 0.52        | -0.27 |
| Wind_my     | 0.12  | -0.20 | 0.29  | 0.19  | -0.01       | -0.13 | -0.09 | 0.13  | 0.14  | 0.41  | 0.15        | 0.30  |
| Wind_jn     | 0.06  | -0.32 | 0.01  | -0.17 | -0.01       | -0.11 | 0.04  | -0.15 | -0.02 | 0.37  | 0.18        | 0.29  |
| Wind_jl     | -0.02 | 0.26  | -0.13 | -0.13 | 0.09        | 0.30  | 0.01  | -0.28 | -0.09 | -0.08 | -0.03       | -0.08 |
| Wind_aug    | 0.13  | -0.25 | -0.17 | 0.50  | 0.04        | 0.42  | -0.43 | 0.16  | 0.12  | 0.21  | 0.07        | -0.02 |

Table S21. A Spearman rho correlation matrix for Scots pine #2 (continued 2).

| Weather par | orgFe        | alcFe | hclFe | orgCu        | alcCu        | hclCu | orgZn | alcZn        | hclZn |
|-------------|--------------|-------|-------|--------------|--------------|-------|-------|--------------|-------|
| lv_jn_ind   | -0.31        | 0.46  | 0.21  | <b>-0.55</b> | 0.30         | 0.41  | 0.52  | -0.18        | -0.02 |
| lv_jl_ind   | -0.47        | -0.30 | -0.21 | -0.18        | 0.02         | -0.07 | 0.14  | -0.29        | 0.12  |
| lv_au_ind   | -0.08        | -0.34 | -0.28 | -0.06        | -0.13        | 0.20  | -0.32 | -0.22        | -0.08 |
| lv-Vys_jn   | -0.32        | 0.37  | 0.20  | <b>-0.57</b> | 0.10         | 0.25  | 0.49  | -0.38        | -0.05 |
| lv-Vys_jl   | <b>-0.61</b> | -0.24 | -0.18 | -0.26        | 0.12         | -0.08 | 0.08  | -0.26        | 0.08  |
| lv-Vys_aug  | -0.20        | -0.19 | -0.24 | -0.35        | -0.07        | 0.03  | -0.21 | -0.11        | -0.11 |
| Hum_may     | -0.15        | -0.10 | -0.41 | -0.07        | 0.33         | 0.06  | -0.18 | <b>0.69</b>  | 0.18  |
| Hum_jn      | -0.07        | 0.52  | 0.37  | -0.54        | 0.07         | 0.15  | 0.30  | -0.12        | -0.18 |
| Hum_jl      | <b>-0.76</b> | -0.14 | -0.36 | -0.45        | 0.05         | 0.07  | -0.18 | -0.05        | 0.00  |
| Hum_aug     | <b>-0.79</b> | -0.32 | -0.46 | <b>-0.57</b> | 0.40         | -0.04 | -0.12 | 0.01         | 0.19  |
| T_may       | 0.13         | -0.04 | 0.31  | -0.11        | <b>-0.63</b> | -0.40 | -0.20 | <b>-0.59</b> | -0.38 |
| T_jn        | 0.15         | -0.04 | -0.13 | -0.12        | 0.09         | 0.22  | -0.32 | 0.41         | -0.08 |
| T_jl        | 0.22         | 0.45  | 0.20  | -0.24        | -0.18        | -0.25 | 0.42  | 0.07         | -0.27 |
| T_aug       | 0.38         | -0.18 | -0.04 | 0.27         | -0.46        | 0.01  | -0.37 | -0.08        | -0.20 |
| Prec_jn     | -0.29        | 0.42  | 0.15  | <b>-0.58</b> | -0.01        | 0.23  | 0.54  | -0.35        | -0.10 |
| Prec_jl     | -0.37        | -0.23 | -0.08 | -0.03        | -0.01        | -0.22 | 0.14  | -0.26        | -0.01 |
| Prec_aug    | 0.06         | -0.07 | -0.13 | -0.17        | -0.25        | 0.12  | -0.24 | -0.15        | -0.22 |
| Wind_my     | 0.08         | 0.10  | 0.23  | -0.01        | -0.06        | -0.17 | 0.32  | -0.37        | -0.33 |
| Wind_jn     | -0.02        | 0.06  | 0.38  | -0.10        | -0.26        | -0.39 | 0.41  | <b>-0.82</b> | -0.16 |
| Wind_jl     | -0.01        | -0.17 | 0.12  | 0.45         | -0.35        | -0.38 | 0.00  | -0.44        | 0.28  |
| Wind_aug    | 0.23         | 0.40  | 0.37  | 0.28         | -0.19        | -0.38 | 0.40  | -0.14        | 0.23  |

Table S22. A Kendall tau correlation matrix for Scots pine #2.

| Weather par        | orgCa* | alcCa | hclCa | orgSr                    | alcSr        | hclSr | orgK  | alcK  | hclK  | orgAl        | alcAl       | hclAl       |
|--------------------|--------|-------|-------|--------------------------|--------------|-------|-------|-------|-------|--------------|-------------|-------------|
| <b>lv_jn_ind**</b> | 0.21   | 0.15  | 0.28  | 0.26                     | 0.26         | -0.03 | 0.08  | -0.10 | 0.05  | <b>-0.56</b> | -0.10       | 0.26        |
| <b>lv_jl_ind</b>   | -0.28  | -0.13 | -0.15 | <b>-0.44<sup>†</sup></b> | <b>-0.49</b> | -0.05 | -0.10 | -0.08 | 0.28  | 0.03         | 0.33        | 0.33        |
| <b>lv_au_ind</b>   | -0.03  | -0.18 | -0.15 | -0.23                    | -0.18        | 0.31  | 0.05  | -0.13 | 0.23  | 0.18         | -0.03       | 0.23        |
| <b>lv-Vys_jn</b>   | 0.23   | 0.18  | 0.26  | 0.28                     | 0.18         | -0.05 | 0.00  | -0.18 | 0.03  | <b>-0.44</b> | -0.08       | 0.18        |
| <b>lv-Vys_jl</b>   | -0.23  | -0.18 | -0.26 | <b>-0.49</b>             | <b>-0.49</b> | -0.10 | 0.00  | 0.03  | 0.28  | -0.18        | 0.33        | 0.38        |
| <b>lv-Vys_aug</b>  | 0.03   | -0.03 | -0.21 | -0.13                    | -0.13        | 0.26  | 0.00  | -0.03 | 0.28  | -0.08        | 0.18        | 0.33        |
| <b>Hum_may</b>     | -0.18  | -0.03 | -0.10 | -0.03                    | -0.03        | -0.21 | 0.10  | 0.23  | -0.28 | -0.13        | 0.33        | -0.03       |
| <b>Hum_jn</b>      | 0.28   | 0.18  | 0.10  | <b>0.44</b>              | 0.28         | -0.05 | -0.10 | -0.13 | -0.08 | <b>-0.44</b> | -0.23       | 0.03        |
| <b>Hum_jl</b>      | -0.21  | -0.21 | -0.38 | -0.15                    | -0.31        | -0.18 | 0.03  | -0.05 | 0.10  | -0.31        | 0.41        | <b>0.46</b> |
| <b>Hum_aug</b>     | -0.22  | -0.17 | -0.37 | <b>-0.48</b>             | <b>-0.43</b> | -0.04 | 0.06  | -0.01 | 0.27  | -0.25        | <b>0.43</b> | <b>0.63</b> |
| <b>T_may</b>       | 0.18   | 0.13  | -0.26 | 0.03                     | -0.18        | 0.31  | -0.15 | -0.08 | 0.13  | 0.18         | -0.08       | -0.08       |
| <b>T_jn</b>        | 0.03   | 0.03  | -0.10 | -0.03                    | -0.08        | 0.10  | -0.26 | -0.18 | -0.03 | -0.03        | -0.18       | 0.08        |
| <b>T_jl</b>        | 0.21   | 0.41  | 0.18  | 0.36                     | 0.41         | -0.13 | -0.08 | 0.05  | -0.10 | -0.21        | 0.10        | -0.10       |
| <b>T_aug</b>       | 0.08   | 0.08  | -0.05 | 0.23                     | 0.13         | 0.10  | 0.31  | 0.28  | -0.28 | 0.28         | 0.03        | -0.33       |
| <b>Prec_jn</b>     | 0.15   | 0.21  | 0.23  | 0.31                     | 0.26         | -0.08 | -0.13 | -0.26 | 0.10  | <b>-0.46</b> | 0.00        | 0.21        |
| <b>Prec_jl</b>     | -0.23  | -0.13 | -0.15 | <b>-0.49</b>             | <b>-0.44</b> | 0.00  | 0.00  | 0.03  | 0.33  | 0.03         | 0.38        | 0.23        |
| <b>Prec_aug</b>    | 0.13   | 0.03  | 0.00  | -0.03                    | 0.03         | 0.41  | 0.10  | -0.03 | 0.08  | 0.03         | -0.03       | 0.13        |
| <b>Wind_my</b>     | 0.21   | 0.21  | 0.18  | -0.03                    | 0.03         | 0.18  | 0.10  | 0.08  | 0.18  | -0.10        | 0.03        | -0.08       |
| <b>Wind_jn</b>     | 0.17   | 0.09  | 0.09  | 0.06                     | 0.06         | 0.19  | 0.04  | 0.04  | 0.32  | 0.09         | 0.04        | -0.04       |
| <b>Wind_jl</b>     | -0.19  | -0.14 | -0.12 | -0.14                    | -0.19        | 0.09  | 0.04  | 0.06  | 0.09  | <b>0.43</b>  | 0.09        | -0.06       |
| <b>Wind_aug</b>    | 0.09   | 0.22  | 0.27  | 0.19                     | 0.35         | 0.22  | 0.27  | 0.37  | -0.09 | 0.04         | 0.12        | -0.30       |

\* as in Table S1

\*\* as in Table S1

<sup>†</sup> as in Table S1

Table S22. A Kendall tau correlation matrix for Scots pine #2 (continued 1).

| Weather par | orgP  | alcP        | hclP  | orgS         | alcS        | hclS  | orgTi | alcTi | hclTi | orgMn | alcMn       | hclMn |
|-------------|-------|-------------|-------|--------------|-------------|-------|-------|-------|-------|-------|-------------|-------|
| lv_jn_ind   | 0.00  | -0.21       | 0.07  | -0.10        | 0.00        | 0.04  | 0.23  | 0.18  | -0.08 | -0.08 | -0.13       | 0.18  |
| lv_jl_ind   | 0.18  | 0.38        | 0.30  | -0.13        | <b>0.44</b> | 0.16  | 0.36  | 0.00  | -0.15 | -0.15 | 0.05        | 0.26  |
| lv_au_ind   | 0.13  | -0.03       | 0.04  | 0.13         | <b>0.44</b> | -0.04 | 0.31  | -0.26 | -0.10 | 0.36  | <b>0.51</b> | -0.10 |
| lv-Vys_jn   | 0.03  | -0.23       | 0.09  | -0.28        | -0.03       | -0.10 | 0.21  | 0.05  | 0.05  | -0.05 | -0.15       | 0.15  |
| lv-Vys_jl   | 0.18  | 0.38        | 0.35  | -0.13        | <b>0.44</b> | 0.10  | 0.26  | 0.05  | 0.00  | -0.21 | 0.00        | 0.21  |
| lv-Vys_aug  | 0.13  | -0.13       | 0.01  | 0.03         | <b>0.44</b> | -0.04 | 0.21  | -0.21 | -0.05 | 0.26  | 0.36        | -0.05 |
| Hum_may     | 0.28  | 0.13        | -0.14 | 0.13         | -0.08       | 0.10  | -0.15 | 0.36  | 0.10  | 0.00  | -0.05       | 0.05  |
| Hum_jn      | -0.23 | -0.28       | -0.04 | <b>-0.44</b> | -0.28       | -0.19 | 0.00  | 0.00  | 0.10  | -0.26 | -0.21       | -0.10 |
| Hum_jl      | 0.15  | 0.26        | 0.27  | -0.31        | 0.31        | -0.01 | 0.18  | -0.08 | 0.13  | -0.33 | -0.13       | -0.03 |
| Hum_aug     | 0.32  | 0.17        | 0.05  | -0.06        | <b>0.43</b> | 0.06  | 0.19  | -0.04 | 0.12  | 0.01  | 0.27        | 0.14  |
| T_may       | -0.28 | -0.03       | 0.12  | -0.28        | 0.08        | -0.40 | 0.10  | -0.15 | 0.05  | -0.05 | 0.00        | -0.36 |
| T_jn        | -0.28 | 0.03        | -0.07 | -0.18        | 0.03        | -0.07 | 0.05  | -0.15 | -0.10 | -0.05 | 0.05        | -0.15 |
| T_jl        | -0.05 | -0.36       | 0.20  | 0.05         | -0.26       | -0.22 | -0.23 | 0.23  | 0.28  | 0.08  | -0.18       | 0.03  |
| T_aug       | 0.18  | -0.18       | -0.25 | 0.18         | -0.08       | -0.13 | 0.05  | 0.21  | -0.10 | 0.31  | 0.05        | -0.21 |
| Prec_jn     | 0.00  | -0.31       | 0.22  | -0.31        | 0.00        | -0.04 | 0.23  | 0.08  | 0.08  | -0.03 | -0.18       | 0.08  |
| Prec_jl     | 0.13  | <b>0.44</b> | 0.33  | -0.13        | 0.33        | 0.22  | 0.15  | 0.05  | 0.00  | -0.10 | 0.05        | 0.26  |
| Prec_aug    | 0.08  | -0.18       | -0.07 | 0.13         | 0.23        | -0.10 | 0.15  | -0.21 | -0.05 | 0.36  | 0.36        | -0.10 |
| Wind_my     | 0.05  | -0.16       | 0.20  | 0.13         | -0.08       | -0.08 | -0.08 | 0.08  | 0.13  | 0.26  | 0.08        | 0.16  |
| Wind_jn     | -0.01 | -0.22       | 0.03  | -0.06        | -0.04       | -0.14 | -0.01 | -0.14 | -0.04 | 0.25  | 0.19        | 0.22  |
| Wind_jl     | 0.04  | 0.14        | -0.08 | -0.14        | 0.06        | 0.24  | 0.04  | -0.25 | -0.04 | -0.06 | -0.01       | -0.09 |
| Wind_aug    | 0.09  | -0.19       | -0.11 | 0.40         | 0.01        | 0.32  | -0.30 | 0.09  | 0.09  | 0.12  | 0.06        | 0.01  |

Table S22. A Kendall tau correlation matrix for Scots pine #2 (continued 2).

| Weather par | orgFe        | alcFe | hclFe | orgCu        | alcCu        | hclCu | orgZn | alcZn        | hclZn |
|-------------|--------------|-------|-------|--------------|--------------|-------|-------|--------------|-------|
| lv_jn_ind   | -0.21        | 0.33  | 0.13  | <b>-0.44</b> | 0.18         | 0.28  | 0.31  | -0.10        | 0.00  |
| lv_jl_ind   | -0.28        | -0.26 | -0.10 | -0.21        | 0.05         | -0.05 | 0.23  | -0.18        | 0.08  |
| lv_au_ind   | -0.08        | -0.21 | -0.21 | 0.00         | -0.05        | 0.15  | -0.23 | -0.13        | -0.08 |
| lv-Vys_jn   | -0.18        | 0.26  | 0.21  | -0.41        | 0.05         | 0.15  | 0.33  | -0.18        | -0.03 |
| lv-Vys_jl   | -0.38        | -0.21 | -0.10 | -0.21        | 0.05         | -0.10 | 0.13  | -0.13        | 0.03  |
| lv-Vys_aug  | -0.18        | -0.10 | -0.10 | -0.26        | -0.10        | 0.00  | -0.18 | -0.03        | -0.08 |
| Hum_may     | -0.08        | -0.10 | -0.26 | -0.10        | 0.21         | 0.05  | -0.08 | <b>0.49</b>  | 0.08  |
| Hum_jn      | -0.03        | 0.41  | 0.21  | -0.41        | 0.00         | 0.15  | 0.08  | -0.08        | -0.13 |
| Hum_jl      | <b>-0.56</b> | -0.08 | -0.18 | -0.33        | 0.03         | 0.08  | -0.10 | -0.05        | 0.00  |
| Hum_aug     | <b>-0.58</b> | -0.25 | -0.35 | -0.37        | 0.30         | -0.01 | -0.09 | 0.09         | 0.17  |
| T_may       | 0.13         | -0.05 | 0.21  | -0.15        | <b>-0.46</b> | -0.31 | -0.13 | <b>-0.44</b> | -0.28 |
| T_jn        | 0.13         | 0.00  | -0.05 | -0.15        | 0.00         | 0.15  | -0.23 | 0.38         | -0.03 |
| T_jl        | 0.10         | 0.33  | 0.13  | -0.23        | -0.18        | -0.18 | 0.26  | 0.00         | -0.15 |
| T_aug       | 0.23         | -0.10 | -0.05 | 0.21         | -0.31        | -0.05 | -0.23 | -0.03        | -0.18 |
| Prec_jn     | -0.21        | 0.33  | 0.13  | <b>-0.44</b> | -0.08        | 0.18  | 0.36  | -0.15        | -0.05 |
| Prec_jl     | -0.18        | -0.15 | 0.00  | -0.05        | 0.00         | -0.15 | 0.13  | -0.18        | 0.03  |
| Prec_aug    | 0.08         | 0.00  | 0.00  | -0.15        | -0.15        | 0.05  | -0.13 | -0.08        | -0.13 |
| Wind_my     | 0.05         | 0.03  | 0.13  | 0.03         | -0.08        | -0.08 | 0.21  | -0.26        | -0.23 |
| Wind_jn     | -0.01        | 0.04  | 0.25  | -0.09        | -0.19        | -0.27 | 0.25  | <b>-0.68</b> | -0.17 |
| Wind_jl     | -0.04        | -0.12 | 0.14  | 0.35         | -0.25        | -0.22 | -0.01 | -0.27        | 0.17  |
| Wind_aug    | 0.25         | 0.30  | 0.30  | 0.22         | -0.09        | -0.30 | 0.27  | -0.09        | 0.17  |

Table S23. A Spearman rho correlation matrix for Scots pine #3.

| Weather par | orgCa* | alcCa | hclCa                   | orgSr        | alcSr | hclSr | orgK  | alcK        | hclK         | orgAl | alcAl | hclAl |
|-------------|--------|-------|-------------------------|--------------|-------|-------|-------|-------------|--------------|-------|-------|-------|
| lv_jn_ind** | 0.32   | 0.25  | <b>0.64<sup>†</sup></b> | 0.25         | 0.27  | 0.27  | -0.09 | -0.38       | 0.41         | 0.09  | -0.37 | 0.19  |
| lv_jl_ind   | 0.13   | 0.15  | 0.48                    | -0.29        | 0.17  | -0.25 | -0.23 | -0.29       | 0.25         | 0.01  | 0.17  | 0.01  |
| lv_au_ind   | -0.40  | -0.13 | -0.26                   | -0.18        | -0.25 | -0.02 | -0.19 | 0.05        | -0.19        | -0.23 | -0.12 | -0.40 |
| lv-Vys_jn   | 0.21   | 0.20  | 0.42                    | 0.16         | 0.25  | 0.21  | -0.06 | -0.33       | 0.19         | 0.05  | -0.31 | 0.13  |
| lv-Vys_jl   | 0.28   | 0.20  | <b>0.61</b>             | -0.16        | 0.31  | -0.18 | -0.09 | -0.22       | 0.29         | -0.02 | 0.23  | 0.09  |
| lv-Vys_aug  | -0.19  | 0.01  | -0.25                   | -0.40        | -0.15 | 0.01  | -0.25 | -0.12       | -0.20        | -0.41 | 0.08  | -0.36 |
| Hum_may     | 0.43   | 0.20  | 0.01                    | <b>-0.57</b> | -0.34 | -0.35 | 0.30  | 0.14        | -0.03        | -0.05 | 0.18  | 0.40  |
| Hum_jn      | 0.11   | 0.02  | 0.26                    | 0.31         | 0.34  | 0.38  | -0.19 | -0.39       | 0.27         | -0.08 | -0.24 | -0.01 |
| Hum_jl      | 0.12   | -0.10 | 0.40                    | -0.34        | 0.14  | -0.20 | 0.02  | -0.11       | 0.24         | -0.14 | 0.15  | -0.02 |
| Hum_aug     | 0.46   | 0.40  | 0.25                    | <b>-0.61</b> | -0.03 | -0.26 | -0.16 | -0.24       | -0.08        | -0.21 | 0.38  | 0.12  |
| T_may       | -0.49  | -0.31 | -0.32                   | 0.25         | 0.45  | 0.25  | -0.15 | -0.02       | -0.20        | -0.38 | 0.10  | -0.49 |
| T_jn        | -0.28  | -0.29 | -0.02                   | -0.09        | -0.12 | 0.03  | -0.47 | -0.34       | 0.32         | -0.31 | -0.16 | -0.22 |
| T_jl        | 0.07   | 0.05  | -0.27                   | -0.12        | -0.05 | 0.13  | 0.23  | -0.04       | -0.19        | -0.44 | -0.08 | 0.22  |
| T_aug       | -0.32  | -0.18 | <b>-0.57</b>            | -0.03        | -0.24 | -0.03 | 0.54  | <b>0.63</b> | -0.45        | 0.01  | -0.09 | -0.18 |
| Prec_jn     | 0.08   | 0.08  | 0.32                    | 0.03         | 0.16  | 0.18  | -0.08 | -0.35       | 0.18         | -0.08 | -0.35 | 0.08  |
| Prec_jl     | 0.16   | 0.14  | 0.43                    | -0.12        | 0.21  | -0.12 | -0.08 | -0.13       | 0.25         | 0.00  | 0.30  | -0.03 |
| Prec_aug    | -0.45  | -0.20 | -0.53                   | -0.21        | -0.28 | 0.15  | -0.12 | 0.09        | -0.33        | -0.36 | -0.12 | -0.49 |
| Wind_my     | 0.11   | 0.22  | 0.02                    | 0.33         | 0.04  | 0.28  | 0.26  | 0.13        | -0.08        | -0.15 | 0.01  | 0.06  |
| Wind_jn     | 0.05   | 0.32  | -0.23                   | 0.18         | 0.19  | 0.29  | 0.05  | 0.07        | -0.44        | 0.10  | 0.25  | -0.24 |
| Wind_jl     | -0.19  | -0.07 | -0.31                   | -0.02        | 0.16  | -0.13 | 0.01  | 0.28        | -0.42        | 0.47  | 0.35  | -0.28 |
| Wind_aug    | 0.13   | 0.24  | -0.42                   | -0.03        | 0.16  | 0.10  | 0.28  | 0.34        | <b>-0.61</b> | 0.23  | 0.20  | 0.05  |

\* as in Table S1

\*\* as in Table S1

<sup>†</sup> as in Table S1

Table S23. A Spearman rho correlation matrix for Scots pine #3 (continued 1).

| Weather par | orgP  | alcP  | hclP  | orgS        | alcS  | hclS         | orgTi       | alcTi | hclTi | orgMn       | alcMn | hclMn |
|-------------|-------|-------|-------|-------------|-------|--------------|-------------|-------|-------|-------------|-------|-------|
| lv_jn_ind   | 0.09  | 0.07  | -0.08 | 0.23        | -0.44 | -0.09        | 0.35        | -0.18 | 0.50  | 0.30        | 0.30  | -0.12 |
| lv_jl_ind   | -0.48 | 0.11  | -0.11 | <b>0.65</b> | 0.21  | 0.16         | 0.38        | 0.03  | 0.36  | 0.39        | 0.09  | 0.52  |
| lv_au_ind   | 0.29  | 0.15  | 0.08  | -0.04       | 0.29  | 0.25         | <b>0.60</b> | 0.16  | -0.23 | -0.10       | -0.32 | 0.30  |
| lv-Vys_jn   | 0.09  | 0.06  | -0.15 | 0.21        | -0.36 | -0.30        | 0.18        | -0.16 | 0.34  | 0.15        | 0.20  | -0.06 |
| lv-Vys_jl   | -0.42 | 0.05  | -0.15 | <b>0.72</b> | 0.11  | 0.30         | 0.34        | -0.07 | 0.25  | 0.48        | 0.20  | 0.45  |
| lv-Vys_aug  | 0.24  | 0.20  | -0.23 | 0.04        | 0.36  | 0.29         | <b>0.77</b> | 0.15  | -0.16 | 0.09        | -0.14 | 0.41  |
| Hum_may     | 0.35  | 0.29  | -0.04 | 0.18        | -0.09 | 0.32         | 0.08        | -0.47 | 0.14  | 0.31        | 0.40  | -0.19 |
| Hum_jn      | 0.00  | -0.16 | -0.26 | -0.17       | -0.42 | -0.34        | 0.04        | 0.10  | 0.18  | -0.03       | 0.10  | -0.10 |
| Hum_jl      | -0.05 | -0.12 | -0.36 | <b>0.62</b> | -0.13 | 0.34         | 0.42        | -0.13 | 0.13  | 0.25        | 0.07  | 0.29  |
| Hum_aug     | 0.18  | 0.34  | -0.15 | 0.54        | 0.04  | <b>0.63</b>  | <b>0.62</b> | -0.22 | -0.14 | <b>0.65</b> | 0.45  | 0.49  |
| T_may       | -0.39 | -0.33 | -0.40 | -0.16       | 0.42  | -0.43        | -0.08       | 0.51  | -0.35 | -0.43       | -0.53 | 0.29  |
| T_jn        | -0.02 | -0.10 | -0.03 | -0.41       | -0.12 | 0.33         | 0.43        | 0.42  | 0.04  | -0.11       | -0.21 | 0.31  |
| T_jl        | 0.21  | 0.18  | -0.47 | -0.16       | 0.07  | -0.13        | 0.02        | -0.18 | 0.16  | -0.10       | 0.06  | -0.05 |
| T_aug       | 0.35  | 0.06  | 0.01  | -0.13       | 0.34  | <b>-0.62</b> | -0.32       | -0.23 | -0.17 | -0.49       | -0.35 | -0.53 |
| Prec_jn     | 0.11  | 0.05  | -0.30 | 0.20        | -0.29 | -0.24        | 0.34        | -0.11 | 0.43  | 0.07        | 0.08  | 0.03  |
| Prec_jl     | -0.53 | 0.06  | -0.15 | <b>0.62</b> | 0.29  | 0.23         | 0.25        | -0.01 | 0.26  | 0.37        | 0.10  | 0.46  |
| Prec_aug    | 0.46  | 0.10  | -0.16 | -0.24       | 0.32  | 0.08         | <b>0.62</b> | 0.17  | -0.27 | -0.25       | -0.37 | 0.15  |
| Wind_my     | 0.07  | 0.28  | -0.05 | 0.09        | 0.13  | -0.07        | -0.10       | -0.26 | -0.02 | 0.04        | 0.09  | 0.06  |
| Wind_jn     | -0.10 | 0.16  | -0.10 | 0.17        | 0.37  | <b>-0.57</b> | -0.21       | -0.06 | -0.24 | 0.01        | 0.04  | 0.06  |
| Wind_jl     | -0.39 | -0.33 | 0.11  | 0.19        | 0.41  | -0.36        | -0.40       | 0.23  | -0.31 | -0.14       | -0.21 | -0.11 |
| Wind_aug    | 0.06  | -0.09 | -0.10 | 0.01        | 0.49  | -0.17        | -0.12       | -0.02 | -0.18 | 0.04        | 0.08  | -0.49 |

Table S23. A Spearman rho correlation matrix for Scots pine #3 (continued 2).

| Weather par | orgFe        | alcFe        | hclFe       | orgCu | alcCu       | hclCu        | orgZn | alcZn       | hclZn       |
|-------------|--------------|--------------|-------------|-------|-------------|--------------|-------|-------------|-------------|
| lv_jn_ind   | 0.20         | <b>0.59</b>  | <b>0.58</b> | 0.02  | 0.05        | -0.46        | 0.27  | 0.04        | 0.01        |
| lv_jl_ind   | <b>0.74</b>  | <b>0.75</b>  | <b>0.59</b> | -0.21 | -0.07       | 0.07         | 0.27  | -0.23       | 0.50        |
| lv_au_ind   | 0.28         | 0.12         | -0.08       | -0.21 | -0.04       | 0.33         | -0.34 | -0.40       | -0.17       |
| lv-Vys_jn   | 0.12         | 0.42         | 0.38        | 0.03  | 0.14        | -0.38        | 0.21  | 0.03        | 0.00        |
| lv-Vys_jl   | <b>0.76</b>  | <b>0.84</b>  | <b>0.74</b> | -0.14 | -0.15       | -0.02        | 0.30  | -0.10       | 0.49        |
| lv-Vys_aug  | 0.24         | 0.21         | 0.07        | -0.21 | -0.10       | 0.21         | -0.13 | -0.13       | -0.01       |
| Hum_may     | -0.26        | -0.18        | 0.19        | 0.45  | -0.02       | 0.25         | 0.34  | <b>0.70</b> | -0.27       |
| Hum_jn      | -0.09        | 0.10         | 0.09        | -0.16 | -0.14       | <b>-0.57</b> | 0.05  | 0.17        | 0.04        |
| Hum_jl      | 0.49         | 0.52         | <b>0.59</b> | 0.05  | -0.20       | 0.04         | 0.21  | 0.18        | 0.14        |
| Hum_aug     | 0.53         | <b>0.61</b>  | 0.53        | -0.07 | -0.28       | 0.22         | 0.29  | 0.26        | 0.16        |
| T_may       | 0.11         | -0.07        | -0.24       | -0.43 | -0.12       | -0.18        | -0.43 | -0.35       | 0.35        |
| T_jn        | 0.23         | -0.08        | -0.19       | -0.39 | -0.42       | -0.07        | -0.30 | -0.07       | -0.11       |
| T_jl        | -0.41        | -0.27        | -0.04       | 0.47  | <b>0.57</b> | -0.20        | 0.21  | 0.34        | -0.25       |
| T_aug       | <b>-0.68</b> | <b>-0.65</b> | -0.34       | 0.32  | 0.26        | 0.30         | -0.20 | 0.17        | -0.34       |
| Prec_jn     | 0.11         | 0.39         | 0.37        | 0.10  | 0.27        | -0.34        | 0.21  | -0.01       | -0.06       |
| Prec_jl     | <b>0.63</b>  | <b>0.67</b>  | <b>0.57</b> | -0.11 | 0.00        | 0.01         | 0.36  | -0.17       | <b>0.56</b> |
| Prec_aug    | -0.11        | -0.15        | -0.25       | -0.08 | 0.09        | 0.23         | -0.31 | -0.21       | -0.27       |
| Wind_my     | 0.01         | 0.09         | 0.14        | 0.26  | 0.45        | -0.15        | 0.26  | -0.01       | -0.01       |
| Wind_jn     | -0.16        | 0.11         | -0.08       | -0.07 | 0.33        | -0.09        | 0.21  | -0.18       | 0.39        |
| Wind_jl     | -0.15        | -0.03        | -0.26       | -0.19 | 0.02        | 0.26         | -0.14 | -0.43       | 0.47        |
| Wind_aug    | <b>-0.62</b> | -0.07        | -0.07       | 0.26  | 0.43        | 0.09         | -0.02 | -0.17       | 0.17        |

Table S24. A Kendall tau correlation matrix for Scots pine #3.

| Weather par | orgCa* | alcCa | hclCa             | orgSr | alcSr | hclSr | orgK  | alcK  | hclK  | orgAl | alcAl | hclAl |
|-------------|--------|-------|-------------------|-------|-------|-------|-------|-------|-------|-------|-------|-------|
| lv_jn_ind** | 0.31   | 0.21  | 0.46              | 0.21  | 0.15  | 0.26  | -0.03 | -0.26 | 0.31  | 0.08  | -0.23 | 0.18  |
| lv_jl_ind   | 0.08   | 0.13  | 0.33              | -0.13 | 0.08  | -0.18 | -0.21 | -0.23 | 0.13  | 0.00  | 0.10  | -0.05 |
| lv_au_ind   | -0.28  | -0.13 | -0.23             | -0.08 | -0.18 | -0.03 | -0.10 | 0.03  | -0.13 | -0.21 | -0.10 | -0.31 |
| lv-Vys_jn   | 0.18   | 0.13  | 0.23              | 0.18  | 0.23  | 0.23  | -0.05 | -0.28 | 0.08  | 0.05  | -0.26 | 0.05  |
| lv-Vys_jl   | 0.18   | 0.13  | 0.49 <sup>†</sup> | -0.08 | 0.23  | -0.13 | -0.10 | -0.18 | 0.23  | -0.05 | 0.21  | 0.00  |
| lv-Vys_aug  | -0.13  | -0.03 | -0.18             | -0.28 | -0.03 | 0.03  | -0.21 | -0.13 | -0.13 | -0.21 | 0.10  | -0.26 |
| Hum_may     | 0.38   | 0.18  | 0.03              | -0.38 | -0.23 | -0.23 | 0.21  | 0.08  | 0.03  | -0.05 | 0.15  | 0.26  |
| Hum_jn      | 0.13   | -0.03 | 0.13              | 0.23  | 0.23  | 0.28  | -0.10 | -0.33 | 0.18  | -0.05 | -0.15 | 0.00  |
| Hum_jl      | 0.15   | -0.05 | 0.26              | -0.26 | 0.10  | -0.15 | -0.03 | -0.05 | 0.15  | -0.08 | 0.13  | 0.03  |
| Hum_aug     | 0.35   | 0.25  | 0.22              | -0.43 | -0.06 | -0.17 | -0.09 | -0.17 | -0.09 | -0.06 | 0.27  | 0.09  |
| T_may       | -0.33  | -0.13 | -0.23             | 0.18  | 0.33  | 0.18  | -0.10 | 0.03  | -0.13 | -0.26 | 0.05  | -0.41 |
| T_jn        | -0.18  | -0.18 | -0.03             | -0.03 | -0.08 | 0.08  | -0.36 | -0.28 | 0.23  | -0.15 | -0.10 | -0.15 |
| T_jl        | 0.05   | 0.05  | -0.21             | -0.10 | -0.05 | 0.00  | 0.13  | 0.00  | -0.15 | -0.33 | -0.08 | 0.23  |
| T_aug       | -0.33  | -0.13 | -0.44             | -0.03 | -0.18 | -0.03 | 0.31  | 0.44  | -0.28 | 0.05  | -0.10 | -0.21 |
| Prec_jn     | 0.10   | 0.10  | 0.21              | 0.00  | 0.10  | 0.15  | -0.08 | -0.26 | 0.10  | -0.03 | -0.28 | 0.03  |
| Prec_jl     | 0.13   | 0.13  | 0.33              | -0.03 | 0.13  | -0.13 | -0.05 | -0.08 | 0.18  | -0.05 | 0.21  | 0.00  |
| Prec_aug    | -0.33  | -0.13 | -0.44             | -0.03 | -0.18 | 0.18  | -0.10 | 0.03  | -0.23 | -0.26 | -0.10 | -0.41 |
| Wind_my     | 0.08   | 0.16  | -0.03             | 0.23  | 0.00  | 0.21  | 0.21  | 0.08  | -0.08 | -0.13 | -0.05 | -0.03 |
| Wind_jn     | 0.09   | 0.25  | -0.12             | 0.12  | 0.17  | 0.17  | 0.12  | 0.12  | -0.30 | 0.04  | 0.22  | -0.14 |
| Wind_jl     | -0.12  | -0.06 | -0.27             | -0.04 | 0.09  | -0.09 | -0.04 | 0.12  | -0.32 | 0.35  | 0.27  | -0.19 |
| Wind_aug    | 0.12   | 0.17  | -0.30             | -0.01 | 0.17  | 0.09  | 0.27  | 0.25  | -0.50 | 0.22  | 0.14  | 0.04  |

\* as in Table S1

\*\* as in Table S1

<sup>†</sup> as in Table S1

Table S24. A Kendall tau correlation matrix for Scots pine #3 (continued 1).

| Weather par | orgP  | alcP  | hclP  | orgS        | alcS  | hclS         | orgTi       | alcTi | hclTi | orgMn       | alcMn | hclMn       |
|-------------|-------|-------|-------|-------------|-------|--------------|-------------|-------|-------|-------------|-------|-------------|
| lv_jn_ind   | 0.05  | 0.08  | -0.05 | 0.13        | -0.33 | -0.08        | 0.26        | -0.18 | 0.33  | 0.18        | 0.26  | -0.05       |
| lv_jl_ind   | -0.33 | 0.15  | -0.08 | <b>0.46</b> | 0.15  | 0.11         | 0.28        | 0.00  | 0.26  | 0.26        | 0.08  | <b>0.44</b> |
| lv_au_ind   | 0.23  | 0.10  | 0.03  | -0.05       | 0.21  | 0.24         | 0.38        | 0.10  | -0.21 | -0.05       | -0.23 | 0.28        |
| lv-Vys_jn   | 0.08  | 0.05  | -0.13 | 0.15        | -0.26 | -0.19        | 0.13        | -0.15 | 0.21  | 0.10        | 0.13  | -0.03       |
| lv-Vys_jl   | -0.28 | 0.10  | -0.08 | <b>0.51</b> | 0.05  | 0.21         | 0.23        | -0.05 | 0.21  | 0.31        | 0.13  | 0.33        |
| lv-Vys_aug  | 0.23  | 0.10  | -0.13 | 0.05        | 0.26  | 0.21         | <b>0.59</b> | 0.10  | -0.05 | 0.05        | -0.13 | 0.38        |
| Hum_may     | 0.28  | 0.21  | -0.03 | 0.10        | -0.05 | 0.19         | 0.03        | -0.36 | 0.10  | 0.21        | 0.33  | -0.13       |
| Hum_jn      | -0.03 | -0.10 | -0.18 | -0.10       | -0.31 | -0.21        | -0.03       | 0.05  | 0.10  | 0.00        | 0.08  | -0.08       |
| Hum_jl      | 0.00  | -0.08 | -0.26 | <b>0.44</b> | -0.08 | 0.24         | 0.36        | -0.13 | 0.08  | 0.18        | 0.10  | 0.15        |
| Hum_aug     | 0.19  | 0.30  | -0.09 | 0.40        | 0.06  | <b>0.50</b>  | <b>0.45</b> | -0.19 | -0.12 | <b>0.45</b> | 0.32  | 0.37        |
| T_may       | -0.23 | -0.21 | -0.28 | -0.10       | 0.26  | -0.32        | -0.08       | 0.36  | -0.26 | -0.36       | -0.38 | 0.18        |
| T_jn        | 0.08  | -0.10 | -0.03 | -0.31       | -0.10 | 0.21         | 0.28        | 0.31  | 0.05  | -0.15       | -0.18 | 0.23        |
| T_jl        | 0.21  | 0.13  | -0.36 | -0.13       | 0.03  | -0.11        | 0.00        | -0.13 | 0.08  | -0.13       | 0.05  | -0.05       |
| T_aug       | 0.28  | 0.05  | 0.03  | -0.05       | 0.21  | <b>-0.43</b> | -0.23       | -0.21 | -0.15 | -0.36       | -0.28 | -0.33       |
| Prec_jn     | 0.10  | 0.03  | -0.21 | 0.13        | -0.28 | -0.16        | 0.26        | -0.08 | 0.28  | 0.03        | 0.05  | 0.05        |
| Prec_jl     | -0.38 | 0.10  | -0.13 | 0.41        | 0.21  | 0.16         | 0.18        | 0.00  | 0.15  | 0.26        | 0.08  | 0.33        |
| Prec_aug    | 0.38  | 0.05  | -0.13 | -0.15       | 0.26  | 0.05         | 0.38        | 0.10  | -0.26 | -0.15       | -0.28 | 0.18        |
| Wind_my     | 0.03  | 0.21  | 0.00  | 0.08        | 0.08  | -0.03        | -0.08       | -0.18 | 0.00  | 0.05        | 0.08  | 0.03        |
| Wind_jn     | -0.09 | 0.12  | -0.09 | 0.12        | 0.27  | <b>-0.47</b> | -0.14       | -0.01 | -0.14 | 0.01        | 0.04  | -0.01       |
| Wind_jl     | -0.30 | -0.25 | 0.12  | 0.17        | 0.30  | -0.26        | -0.25       | 0.14  | -0.19 | -0.09       | -0.12 | -0.06       |
| Wind_aug    | -0.01 | -0.09 | -0.12 | 0.04        | 0.35  | -0.12        | -0.04       | -0.01 | -0.06 | 0.09        | 0.06  | -0.30       |

Table S24. A Kendall tau correlation matrix for Scots pine #3 (continued 2).

| Weather par | orgFe        | alcFe        | hclFe       | orgCu | alcCu | hclCu | orgZn | alcZn       | hclZn |
|-------------|--------------|--------------|-------------|-------|-------|-------|-------|-------------|-------|
| lv_jn_ind   | 0.10         | <b>0.46</b>  | 0.41        | 0.03  | 0.03  | -0.36 | 0.23  | 0.00        | 0.03  |
| lv_jl_ind   | <b>0.59</b>  | <b>0.54</b>  | <b>0.44</b> | -0.15 | 0.00  | 0.08  | 0.21  | -0.18       | 0.36  |
| lv_au_ind   | 0.18         | 0.08         | -0.03       | -0.15 | -0.05 | 0.23  | -0.26 | -0.28       | -0.21 |
| lv-Vys_jn   | 0.08         | 0.33         | 0.33        | 0.00  | 0.10  | -0.33 | 0.15  | 0.03        | 0.00  |
| lv-Vys_jl   | <b>0.59</b>  | <b>0.64</b>  | <b>0.59</b> | -0.10 | -0.05 | 0.03  | 0.26  | -0.08       | 0.41  |
| lv-Vys_aug  | 0.18         | 0.13         | 0.08        | -0.21 | -0.10 | 0.08  | -0.10 | -0.08       | 0.05  |
| Hum_may     | -0.18        | -0.13        | 0.13        | 0.36  | 0.00  | 0.18  | 0.26  | <b>0.54</b> | -0.21 |
| Hum_jn      | -0.08        | 0.08         | 0.08        | -0.10 | -0.05 | -0.38 | 0.00  | 0.13        | 0.00  |
| Hum_jl      | 0.36         | 0.41         | <b>0.46</b> | -0.03 | -0.13 | 0.10  | 0.18  | 0.15        | 0.13  |
| Hum_aug     | 0.37         | <b>0.43</b>  | 0.37        | -0.01 | -0.22 | 0.12  | 0.25  | 0.19        | 0.12  |
| T_may       | 0.03         | -0.03        | -0.23       | -0.26 | -0.05 | -0.13 | -0.26 | -0.28       | 0.26  |
| T_jn        | 0.13         | -0.03        | -0.18       | -0.31 | -0.31 | -0.13 | -0.15 | -0.08       | -0.10 |
| T_jl        | -0.31        | -0.21        | -0.05       | 0.28  | 0.38  | -0.10 | 0.18  | 0.21        | -0.23 |
| T_aug       | <b>-0.49</b> | <b>-0.49</b> | -0.23       | 0.26  | 0.15  | 0.18  | -0.15 | 0.13        | -0.26 |
| Prec_jn     | 0.05         | 0.31         | 0.26        | 0.08  | 0.23  | -0.26 | 0.18  | 0.00        | -0.08 |
| Prec_jl     | <b>0.49</b>  | <b>0.49</b>  | <b>0.44</b> | -0.10 | 0.05  | 0.03  | 0.31  | -0.13       | 0.41  |
| Prec_aug    | -0.08        | -0.13        | -0.13       | -0.10 | 0.05  | 0.08  | -0.15 | -0.13       | -0.26 |
| Wind_my     | -0.03        | 0.08         | 0.08        | 0.21  | 0.39  | -0.10 | 0.16  | 0.03        | 0.00  |
| Wind_jn     | -0.09        | 0.12         | -0.06       | -0.04 | 0.22  | -0.01 | 0.12  | -0.12       | 0.37  |
| Wind_jl     | -0.12        | -0.01        | -0.17       | -0.14 | 0.04  | 0.17  | -0.09 | -0.32       | 0.37  |
| Wind_aug    | <b>-0.45</b> | -0.09        | -0.04       | 0.22  | 0.32  | 0.04  | -0.01 | -0.14       | 0.14  |
