# Supplementary material for: Dendrochemical Challenge in Climate Science: Whether Chemical Elements in Wood Reflect the Fluctuations in Weather Parameters
Source: MDPI journal article supplement (doi:10.3390/plants11233240), 2022-11-25
Supplement: s1 [file s1]

Table S25. Scots pine #1. Initial core. After alcohol extraction. After HCl extraction.

[illegible]

|       |    |    |    |    |     |     |     |     |      |     |     |  |  |  |  |  |  |  |
|-------|----|----|----|----|-----|-----|-----|-----|------|-----|-----|--|--|--|--|--|--|--|
| 22.31 | 25 | 6  | 24 | 0  | 132 | 53  | 11  | 180 | 1394 | 296 | 924 |  |  |  |  |  |  |  |
| 22.41 | 6  | 8  | 34 | 0  | 137 | 83  | 145 | 77  | 1534 | 493 | 948 |  |  |  |  |  |  |  |
| 22.51 | 8  | 19 | 55 | 0  | 152 | 72  | 100 | 122 | 1475 | 238 | 816 |  |  |  |  |  |  |  |
| 22.60 | 22 | 0  | 40 | 0  | 134 | 111 | 173 | 18  | 1645 | 234 | 823 |  |  |  |  |  |  |  |
| 22.71 | 12 | 18 | 42 | 0  | 177 | 140 | 136 | 141 | 1703 | 225 | 861 |  |  |  |  |  |  |  |
| 22.80 | 4  | 13 | 45 | 0  | 129 | 147 | 201 | 89  | 1658 | 280 | 773 |  |  |  |  |  |  |  |
| 22.91 | 5  | 34 | 38 | 0  | 135 | 94  | 222 | 166 | 1600 | 347 | 858 |  |  |  |  |  |  |  |
| 23.00 | 8  | 20 | 20 | 0  | 136 | 31  | 140 | 138 | 1772 | 0   | 952 |  |  |  |  |  |  |  |
| 23.11 | 0  | 12 | 37 | 0  | 113 | 91  | 210 | 228 | 1717 | 185 | 820 |  |  |  |  |  |  |  |
| 23.21 | 17 | 13 | 47 | 0  | 126 | 35  | 221 | 102 | 1580 | 139 | 679 |  |  |  |  |  |  |  |
| 23.31 | 19 | 21 | 17 | 0  | 119 | 89  | 209 | 213 | 1379 | 133 | 655 |  |  |  |  |  |  |  |
| 23.41 | 11 | 12 | 37 | 0  | 122 | 86  | 191 | 131 | 1450 | 280 | 681 |  |  |  |  |  |  |  |
| 23.51 | 8  | 20 | 29 | 0  | 95  | 53  | 230 | 124 | 1647 | 381 | 717 |  |  |  |  |  |  |  |
| 23.61 | 0  | 0  | 23 | 0  | 128 | 110 | 60  | 0   | 1868 | 312 | 651 |  |  |  |  |  |  |  |
| 23.71 | 18 | 10 | 45 | 0  | 124 | 146 | 152 | 65  | 1943 | 225 | 708 |  |  |  |  |  |  |  |
| 23.80 | 14 | 28 | 70 | 0  | 162 | 112 | 198 | 140 | 2103 | 274 | 856 |  |  |  |  |  |  |  |
| 23.91 | 0  | 14 | 35 | 0  | 166 | 113 | 193 | 161 | 2178 | 74  | 980 |  |  |  |  |  |  |  |
| 24.01 | 10 | 12 | 39 | 0  | 128 | 65  | 214 | 151 | 2119 | 152 | 896 |  |  |  |  |  |  |  |
| 24.11 | 9  | 27 | 9  | 0  | 135 | 44  | 282 | 134 | 1918 | 40  | 705 |  |  |  |  |  |  |  |
| 24.20 | 0  | 33 | 32 | 0  | 99  | 67  | 186 | 177 | 1768 | 137 | 607 |  |  |  |  |  |  |  |
| 24.31 | 4  | 32 | 31 | 0  | 133 | 38  | 182 | 172 | 1545 | 203 | 708 |  |  |  |  |  |  |  |
| 24.40 | 18 | 0  | 27 | 0  | 148 | 110 | 204 | 183 | 1477 | 240 | 758 |  |  |  |  |  |  |  |
| 24.51 | 0  | 28 | 38 | 0  | 115 | 84  | 179 | 75  | 1403 | 169 | 676 |  |  |  |  |  |  |  |
| 24.61 | 17 | 19 | 28 | 0  | 145 | 30  | 109 | 35  | 1503 | 233 | 607 |  |  |  |  |  |  |  |
| 24.71 | 13 | 33 | 47 | 0  | 165 | 49  | 68  | 0   | 1534 | 325 | 543 |  |  |  |  |  |  |  |
| 24.81 | 0  | 16 | 42 | 0  | 106 | 72  | 128 | 128 | 1676 | 636 | 623 |  |  |  |  |  |  |  |
| 24.91 | 21 | 24 | 37 | 15 | 145 | 63  | 126 | 0   | 1887 | 600 | 580 |  |  |  |  |  |  |  |
| 25.01 | 10 | 6  | 24 | 37 | 97  | 63  | 134 | 158 | 2047 | 367 | 650 |  |  |  |  |  |  |  |
| 25.11 | 0  | 20 | 40 | 0  | 152 | 42  | 98  | 112 | 2075 | 302 | 759 |  |  |  |  |  |  |  |
| 25.21 | 14 | 6  | 33 | 0  | 155 | 34  | 266 | 210 | 1992 | 102 | 672 |  |  |  |  |  |  |  |
| 25.31 | 0  | 0  | 33 | 0  | 154 | 69  | 281 | 279 | 2103 | 277 | 708 |  |  |  |  |  |  |  |
| 25.41 | 16 | 0  | 27 | 0  | 139 | 89  | 273 | 292 | 1931 | 157 | 636 |  |  |  |  |  |  |  |
| 25.50 | 16 | 14 | 28 | 0  | 134 | 12  | 165 | 133 | 1818 | 110 | 585 |  |  |  |  |  |  |  |
| 25.61 | 0  | 0  | 37 | 0  | 155 | 80  | 193 | 202 | 1775 | 52  | 601 |  |  |  |  |  |  |  |
| 25.70 | 21 | 35 | 26 | 0  | 105 | 66  | 142 | 243 | 1941 | 48  | 660 |  |  |  |  |  |  |  |
| 25.81 | 13 | 4  | 37 | 0  | 134 | 105 | 186 | 137 | 1919 | 223 | 613 |  |  |  |  |  |  |  |
| 25.90 | 0  | 17 | 37 | 0  | 121 | 63  | 152 | 38  | 2045 | 184 | 692 |  |  |  |  |  |  |  |
| 26.01 | 0  | 15 | 34 | 0  | 175 | 52  | 155 | 125 | 2038 | 33  | 786 |  |  |  |  |  |  |  |
| 26.11 | 39 | 32 | 17 | 0  | 121 | 68  | 215 | 262 | 1880 | 77  | 790 |  |  |  |  |  |  |  |
| 26.21 | 0  | 0  | 24 | 0  | 133 | 42  | 238 | 137 | 1844 | 0   | 646 |  |  |  |  |  |  |  |
| 26.30 | 7  | 13 | 27 | 0  | 153 | 0   | 132 | 126 | 1651 | 60  | 576 |  |  |  |  |  |  |  |
| 26.41 | 0  | 5  | 15 | 0  | 125 | 65  | 94  | 145 | 1746 | 76  | 534 |  |  |  |  |  |  |  |
| 26.51 | 0  | 22 | 40 | 0  | 95  | 55  | 132 | 215 | 1721 | 187 | 542 |  |  |  |  |  |  |  |
| 26.61 | 29 | 42 | 35 | 0  | 114 | 56  | 76  | 63  | 1727 | 381 | 492 |  |  |  |  |  |  |  |
| 26.71 | 20 | 0  | 20 | 26 | 120 | 90  | 138 | 43  | 1870 | 365 | 554 |  |  |  |  |  |  |  |
| 26.81 | 0  | 0  | 25 | 0  | 151 | 54  | 49  | 26  | 2138 | 524 | 547 |  |  |  |  |  |  |  |
| 26.91 | 24 | 0  | 22 | 0  | 128 | 73  | 176 | 176 | 2172 | 330 | 585 |  |  |  |  |  |  |  |
| 27.01 | 4  | 4  | 30 | 0  | 141 | 76  | 149 | 263 | 2134 | 282 | 681 |  |  |  |  |  |  |  |
| 27.11 | 5  | 10 | 42 | 0  | 152 | 65  | 258 | 120 | 2010 | 68  | 714 |  |  |  |  |  |  |  |
| 27.21 | 0  | 0  | 22 | 0  | 154 | 102 | 189 | 181 | 1902 | 137 | 717 |  |  |  |  |  |  |  |
| 27.31 | 0  | 0  | 35 | 9  | 164 | 54  | 156 | 222 | 1868 | 36  | 654 |  |  |  |  |  |  |  |
| 27.40 | 5  | 10 | 34 | 0  | 133 | 72  | 209 | 156 | 1661 | 50  | 510 |  |  |  |  |  |  |  |
| 27.51 | 0  | 4  | 30 | 0  | 196 | 98  | 91  | 212 | 1777 | 209 | 524 |  |  |  |  |  |  |  |
| 27.61 | 14 | 8  | 33 | 0  | 146 | 110 | 0   | 19  | 1772 | 137 | 512 |  |  |  |  |  |  |  |
| 27.71 | 23 | 0  | 45 | 0  | 171 | 128 | 90  | 0   | 2012 | 539 | 483 |  |  |  |  |  |  |  |
| 27.81 | 21 | 18 | 31 | 0  | 152 | 172 | 159 | 205 | 2112 | 171 | 598 |  |  |  |  |  |  |  |
| 27.91 | 8  | 37 | 37 | 0  | 207 | 66  | 75  | 113 | 2168 | 151 | 643 |  |  |  |  |  |  |  |
| 28.01 | 6  | 0  | 15 | 0  | 125 | 125 | 278 | 249 | 2072 | 54  | 636 |  |  |  |  |  |  |  |

|       |    |    |    |    |     |     |     |     |      |     |     |  |  |  |  |  |  |  |
|-------|----|----|----|----|-----|-----|-----|-----|------|-----|-----|--|--|--|--|--|--|--|
| 28.10 | 13 | 0  | 16 | 0  | 199 | 65  | 247 | 338 | 1884 | 0   | 585 |  |  |  |  |  |  |  |
| 28.21 | 19 | 0  | 25 | 0  | 118 | 86  | 256 | 213 | 1810 | 33  | 519 |  |  |  |  |  |  |  |
| 28.31 | 0  | 28 | 49 | 0  | 116 | 75  | 167 | 196 | 1652 | 181 | 514 |  |  |  |  |  |  |  |
| 28.41 | 6  | 22 | 41 | 0  | 132 | 78  | 190 | 205 | 1634 | 261 | 495 |  |  |  |  |  |  |  |
| 28.51 | 14 | 23 | 53 | 0  | 190 | 123 | 150 | 140 | 1589 | 53  | 463 |  |  |  |  |  |  |  |
| 28.61 | 0  | 24 | 37 | 0  | 96  | 167 | 39  | 100 | 1637 | 456 | 472 |  |  |  |  |  |  |  |
| 28.70 | 13 | 0  | 9  | 0  | 150 | 99  | 55  | 58  | 1836 | 319 | 501 |  |  |  |  |  |  |  |
| 28.81 | 18 | 13 | 35 | 0  | 113 | 85  | 52  | 121 | 2068 | 526 | 538 |  |  |  |  |  |  |  |
| 28.91 | 0  | 8  | 40 | 0  | 160 | 110 | 48  | 194 | 2121 | 354 | 596 |  |  |  |  |  |  |  |
| 29.01 | 0  | 0  | 35 | 0  | 105 | 91  | 197 | 212 | 2308 | 124 | 642 |  |  |  |  |  |  |  |
| 29.11 | 0  | 22 | 37 | 0  | 170 | 76  | 112 | 311 | 2166 | 198 | 601 |  |  |  |  |  |  |  |
| 29.21 | 0  | 10 | 28 | 0  | 163 | 36  | 209 | 175 | 1967 | 52  | 545 |  |  |  |  |  |  |  |
| 29.31 | 0  | 21 | 32 | 0  | 166 | 38  | 231 | 357 | 1898 | 56  | 653 |  |  |  |  |  |  |  |
| 29.41 | 0  | 9  | 39 | 0  | 134 | 88  | 252 | 161 | 1686 | 126 | 538 |  |  |  |  |  |  |  |
| 29.51 | 0  | 10 | 28 | 0  | 171 | 73  | 206 | 61  | 1624 | 191 | 456 |  |  |  |  |  |  |  |
| 29.61 | 0  | 10 | 41 | 0  | 101 | 73  | 12  | 146 | 1753 | 333 | 460 |  |  |  |  |  |  |  |
| 29.70 | 27 | 20 | 34 | 0  | 118 | 72  | 56  | 17  | 1808 | 293 | 433 |  |  |  |  |  |  |  |
| 29.81 | 12 | 16 | 59 | 0  | 159 | 75  | 121 | 78  | 2098 | 336 | 557 |  |  |  |  |  |  |  |
| 29.91 | 9  | 23 | 17 | 0  | 190 | 100 | 175 | 192 | 2278 | 230 | 632 |  |  |  |  |  |  |  |
| 30.01 | 6  | 7  | 46 | 0  | 195 | 97  | 222 | 124 | 2527 | 278 | 690 |  |  |  |  |  |  |  |
| 30.11 | 6  | 39 | 49 | 0  | 143 | 47  | 134 | 121 | 2469 | 63  | 734 |  |  |  |  |  |  |  |
| 30.21 | 8  | 12 | 30 | 0  | 143 | 62  | 214 | 212 | 2350 | 0   | 674 |  |  |  |  |  |  |  |
| 30.31 | 0  | 21 | 40 | 0  | 160 | 55  | 267 | 275 | 2197 | 70  | 507 |  |  |  |  |  |  |  |
| 30.41 | 0  | 16 | 36 | 0  | 184 | 99  | 202 | 423 | 1946 | 94  | 457 |  |  |  |  |  |  |  |
| 30.51 | 20 | 19 | 41 | 0  | 90  | 67  | 120 | 210 | 1858 | 104 | 424 |  |  |  |  |  |  |  |
| 30.61 | 6  | 17 | 44 | 0  | 154 | 46  | 157 | 202 | 1898 | 241 | 430 |  |  |  |  |  |  |  |
| 30.71 | 0  | 8  | 20 | 0  | 176 | 116 | 147 | 37  | 2068 | 276 | 439 |  |  |  |  |  |  |  |
| 30.81 | 7  | 5  | 35 | 0  | 166 | 81  | 0   | 20  | 2320 | 434 | 560 |  |  |  |  |  |  |  |
| 30.91 | 0  | 17 | 31 | 0  | 152 | 105 | 71  | 108 | 2495 | 159 | 585 |  |  |  |  |  |  |  |
| 31.01 | 0  | 17 | 27 | 0  | 107 | 116 | 102 | 293 | 2540 | 311 | 542 |  |  |  |  |  |  |  |
| 31.11 | 0  | 7  | 34 | 0  | 203 | 0   | 240 | 171 | 2307 | 318 | 529 |  |  |  |  |  |  |  |
| 31.21 | 0  | 0  | 29 | 0  | 169 | 25  | 228 | 350 | 2183 | 205 | 492 |  |  |  |  |  |  |  |
| 31.31 | 23 | 0  | 25 | 0  | 232 | 62  | 149 | 150 | 1946 | 85  | 450 |  |  |  |  |  |  |  |
| 31.41 | 0  | 9  | 29 | 0  | 146 | 65  | 186 | 221 | 1859 | 80  | 458 |  |  |  |  |  |  |  |
| 31.50 | 0  | 6  | 5  | 14 | 180 | 44  | 186 | 139 | 1944 | 72  | 476 |  |  |  |  |  |  |  |
| 31.61 | 25 | 12 | 40 | 0  | 169 | 91  | 87  | 118 | 2055 | 389 | 508 |  |  |  |  |  |  |  |
| 31.70 | 0  | 0  | 28 | 0  | 145 | 85  | 18  | 81  | 2177 | 291 | 494 |  |  |  |  |  |  |  |
| 31.81 | 19 | 5  | 27 | 0  | 169 | 89  | 146 | 150 | 2239 | 177 | 553 |  |  |  |  |  |  |  |
| 31.90 | 10 | 17 | 24 | 0  | 200 | 117 | 191 | 81  | 2393 | 346 | 624 |  |  |  |  |  |  |  |
| 32.01 | 15 | 17 | 19 | 0  | 167 | 45  | 267 | 296 | 2264 | 121 | 592 |  |  |  |  |  |  |  |
| 32.11 | 18 | 0  | 23 | 0  | 207 | 53  | 190 | 248 | 2071 | 99  | 475 |  |  |  |  |  |  |  |
| 32.21 | 13 | 12 | 34 | 0  | 230 | 85  | 234 | 224 | 1795 | 198 | 431 |  |  |  |  |  |  |  |
| 32.31 | 14 | 16 | 23 | 0  | 137 | 83  | 126 | 188 | 1680 | 278 | 373 |  |  |  |  |  |  |  |
| 32.41 | 9  | 0  | 18 | 0  | 151 | 83  | 180 | 94  | 1705 | 340 | 388 |  |  |  |  |  |  |  |
| 32.51 | 0  | 7  | 38 | 0  | 165 | 135 | 58  | 160 | 1807 | 248 | 510 |  |  |  |  |  |  |  |
| 32.61 | 0  | 26 | 46 | 0  | 182 | 122 | 100 | 93  | 1917 | 423 | 392 |  |  |  |  |  |  |  |
| 32.71 | 0  | 0  | 43 | 0  | 155 | 114 | 26  | 59  | 2123 | 358 | 468 |  |  |  |  |  |  |  |
| 32.81 | 0  | 0  | 37 | 0  | 178 | 104 | 143 | 83  | 2273 | 472 | 514 |  |  |  |  |  |  |  |
| 32.91 | 8  | 11 | 10 | 0  | 202 | 71  | 44  | 124 | 2490 | 391 | 566 |  |  |  |  |  |  |  |
| 33.01 | 6  | 7  | 34 | 6  | 147 | 56  | 94  | 243 | 2439 | 225 | 564 |  |  |  |  |  |  |  |
| 33.11 | 28 | 12 | 28 | 0  | 157 | 126 | 131 | 187 | 2346 | 172 | 624 |  |  |  |  |  |  |  |
| 33.20 | 21 | 28 | 35 | 0  | 165 | 88  | 232 | 197 | 2240 | 306 | 639 |  |  |  |  |  |  |  |
| 33.31 | 0  | 12 | 25 | 14 | 196 | 68  | 161 | 283 | 2066 | 156 | 659 |  |  |  |  |  |  |  |
| 33.40 | 0  | 19 | 52 | 0  | 160 | 89  | 172 | 217 | 1858 | 285 | 582 |  |  |  |  |  |  |  |
| 33.51 | 0  | 9  | 20 | 0  | 184 | 100 | 114 | 199 | 2067 | 228 | 497 |  |  |  |  |  |  |  |
| 33.61 | 11 | 9  | 5  | 0  | 171 | 104 | 99  | 86  | 2271 | 315 | 695 |  |  |  |  |  |  |  |
| 33.71 | 33 | 32 | 50 | 0  | 156 | 106 | 168 | 139 | 2508 | 268 | 833 |  |  |  |  |  |  |  |
| 33.81 | 7  | 38 | 27 | 0  | 192 | 79  | 199 | 235 | 2448 | 339 | 817 |  |  |  |  |  |  |  |

|       |    |    |    |    |     |     |     |     |      |     |     |  |  |  |  |  |  |  |  |
|-------|----|----|----|----|-----|-----|-----|-----|------|-----|-----|--|--|--|--|--|--|--|--|
| 33.91 | 0  | 19 | 57 | 0  | 191 | 17  | 250 | 281 | 2151 | 0   | 623 |  |  |  |  |  |  |  |  |
| 34.01 | 13 | 6  | 8  | 0  | 154 | 158 | 143 | 166 | 1881 | 200 | 455 |  |  |  |  |  |  |  |  |
| 34.11 | 0  | 0  | 16 | 0  | 149 | 95  | 93  | 30  | 2053 | 309 | 471 |  |  |  |  |  |  |  |  |
| 34.21 | 9  | 6  | 37 | 0  | 200 | 97  | 102 | 115 | 2161 | 493 | 447 |  |  |  |  |  |  |  |  |
| 34.31 | 0  | 25 | 39 | 0  | 172 | 99  | 97  | 207 | 2276 | 411 | 458 |  |  |  |  |  |  |  |  |
| 34.40 | 14 | 13 | 37 | 0  | 188 | 97  | 35  | 180 | 2488 | 150 | 533 |  |  |  |  |  |  |  |  |
| 34.51 | 10 | 20 | 44 | 0  | 229 | 65  | 132 | 23  | 2487 | 289 | 559 |  |  |  |  |  |  |  |  |
| 34.60 | 0  | 19 | 40 | 0  | 187 | 77  | 124 | 195 | 2411 | 199 | 503 |  |  |  |  |  |  |  |  |
| 34.71 | 11 | 9  | 11 | 0  | 181 | 21  | 253 | 367 | 2010 | 0   | 475 |  |  |  |  |  |  |  |  |
| 34.81 | 9  | 22 | 13 | 0  | 88  | 0   | 134 | 329 | 1715 | 20  | 389 |  |  |  |  |  |  |  |  |
| 34.91 | 13 | 25 | 23 | 0  | 165 | 57  | 175 | 213 | 1621 | 0   | 424 |  |  |  |  |  |  |  |  |
| 35.01 | 20 | 6  | 35 | 0  | 142 | 60  | 192 | 190 | 1583 | 0   | 388 |  |  |  |  |  |  |  |  |
| 35.10 | 8  | 29 | 36 | 0  | 143 | 57  | 146 | 156 | 1760 | 284 | 377 |  |  |  |  |  |  |  |  |
| 35.20 | 14 | 0  | 39 | 0  | 162 | 34  | 121 | 88  | 1940 | 261 | 419 |  |  |  |  |  |  |  |  |
| 35.31 | 14 | 7  | 27 | 0  | 199 | 79  | 112 | 82  | 2115 | 419 | 451 |  |  |  |  |  |  |  |  |
| 35.41 | 0  | 31 | 38 | 0  | 174 | 119 | 62  | 122 | 2301 | 370 | 455 |  |  |  |  |  |  |  |  |
| 35.51 | 0  | 13 | 42 | 0  | 129 | 78  | 112 | 74  | 2326 | 322 | 447 |  |  |  |  |  |  |  |  |
| 35.60 | 0  | 0  | 15 | 0  | 149 | 93  | 57  | 127 | 2567 | 427 | 617 |  |  |  |  |  |  |  |  |
| 35.71 | 0  | 0  | 45 | 0  | 194 | 56  | 124 | 244 | 2504 | 203 | 745 |  |  |  |  |  |  |  |  |
| 35.81 | 0  | 0  | 9  | 0  | 173 | 13  | 276 | 250 | 1999 | 0   | 667 |  |  |  |  |  |  |  |  |
| 35.91 | 13 | 17 | 17 | 0  | 132 | 90  | 150 | 180 | 1926 | 58  | 594 |  |  |  |  |  |  |  |  |
| 36.01 | 0  | 9  | 40 | 33 | 149 | 106 | 68  | 134 | 1971 | 293 | 404 |  |  |  |  |  |  |  |  |
| 36.11 | 0  | 0  | 52 | 82 | 125 | 117 | 104 | 150 | 2101 | 463 | 527 |  |  |  |  |  |  |  |  |
| 36.20 | 9  | 14 | 19 | 62 | 142 | 115 | 106 | 60  | 2377 | 512 | 700 |  |  |  |  |  |  |  |  |
| 36.31 | 27 | 18 | 30 | 0  | 145 | 89  | 142 | 216 | 2381 | 259 | 751 |  |  |  |  |  |  |  |  |
| 36.41 | 10 | 0  | 44 | 0  | 174 | 57  | 210 | 71  | 2040 | 79  | 627 |  |  |  |  |  |  |  |  |
| 36.51 | 10 | 0  | 33 | 0  | 165 | 48  | 131 | 128 | 1964 | 17  | 477 |  |  |  |  |  |  |  |  |
| 36.61 | 11 | 0  | 19 | 28 | 154 | 99  | 73  | 124 | 1910 | 471 | 414 |  |  |  |  |  |  |  |  |
| 36.71 | 0  | 12 | 24 | 10 | 197 | 137 | 142 | 63  | 2116 | 447 | 492 |  |  |  |  |  |  |  |  |
| 36.81 | 0  | 12 | 28 | 0  | 199 | 143 | 105 | 100 | 2422 | 451 | 509 |  |  |  |  |  |  |  |  |
| 36.91 | 0  | 15 | 7  | 0  | 212 | 163 | 44  | 86  | 2678 | 526 | 681 |  |  |  |  |  |  |  |  |
| 37.00 | 0  | 0  | 8  | 0  | 190 | 115 | 171 | 119 | 2530 | 248 | 636 |  |  |  |  |  |  |  |  |
| 37.11 | 13 | 11 | 16 | 0  | 134 | 50  | 175 | 152 | 2369 | 323 | 494 |  |  |  |  |  |  |  |  |
| 37.20 | 0  | 0  | 37 | 0  | 219 | 82  | 89  | 33  | 2501 | 379 | 521 |  |  |  |  |  |  |  |  |
| 37.31 | 15 | 11 | 46 | 0  | 152 | 126 | 132 | 61  | 2747 | 306 | 717 |  |  |  |  |  |  |  |  |
| 37.41 | 20 | 17 | 28 | 0  | 188 | 77  | 156 | 203 | 2548 | 146 | 697 |  |  |  |  |  |  |  |  |
| 37.50 | 4  | 5  | 19 | 0  | 197 | 96  | 100 | 333 | 2172 | 225 | 519 |  |  |  |  |  |  |  |  |
| 37.61 | 0  | 32 | 22 | 0  | 151 | 56  | 162 | 195 | 2135 | 0   | 429 |  |  |  |  |  |  |  |  |
| 37.70 | 23 | 16 | 49 | 0  | 223 | 250 | 149 | 232 | 2301 | 394 | 476 |  |  |  |  |  |  |  |  |
| 37.81 | 8  | 5  | 39 | 7  | 185 | 148 | 62  | 125 | 2342 | 334 | 463 |  |  |  |  |  |  |  |  |
| 37.91 | 20 | 20 | 36 | 0  | 162 | 99  | 80  | 125 | 2312 | 444 | 519 |  |  |  |  |  |  |  |  |
| 38.01 | 6  | 27 | 33 | 0  | 217 | 136 | 0   | 180 | 2458 | 382 | 522 |  |  |  |  |  |  |  |  |
| 38.11 | 13 | 17 | 39 | 0  | 190 | 164 | 30  | 187 | 2628 | 430 | 570 |  |  |  |  |  |  |  |  |
| 38.21 | 18 | 17 | 59 | 0  | 194 | 109 | 84  | 131 | 2956 | 371 | 753 |  |  |  |  |  |  |  |  |
| 38.31 | 0  | 0  | 32 | 0  | 241 | 132 | 124 | 154 | 3060 | 298 | 747 |  |  |  |  |  |  |  |  |
| 38.40 | 5  | 14 | 19 | 0  | 180 | 58  | 190 | 386 | 2489 | 144 | 570 |  |  |  |  |  |  |  |  |
| 38.51 | 0  | 0  | 39 | 0  | 187 | 0   | 208 | 256 | 2103 | 100 | 484 |  |  |  |  |  |  |  |  |
| 38.61 | 13 | 15 | 5  | 0  | 186 | 78  | 236 | 221 | 1993 | 0   | 439 |  |  |  |  |  |  |  |  |
| 38.71 | 11 | 6  | 26 | 0  | 109 | 77  | 133 | 181 | 2120 | 438 | 387 |  |  |  |  |  |  |  |  |
| 38.80 | 0  | 12 | 45 | 0  | 153 | 47  | 106 | 217 | 2071 | 32  | 491 |  |  |  |  |  |  |  |  |
| 38.91 | 9  | 0  | 29 | 0  | 191 | 77  | 20  | 93  | 2011 | 128 | 422 |  |  |  |  |  |  |  |  |
| 39.00 | 0  | 18 | 16 | 26 | 126 | 129 | 58  | 60  | 2104 | 399 | 415 |  |  |  |  |  |  |  |  |
| 39.11 | 7  | 23 | 24 | 0  | 173 | 136 | 72  | 87  | 2276 | 457 | 445 |  |  |  |  |  |  |  |  |
| 39.21 | 8  | 7  | 15 | 0  | 213 | 46  | 43  | 136 | 2465 | 239 | 538 |  |  |  |  |  |  |  |  |
| 39.31 | 0  | 5  | 39 | 0  | 131 | 124 | 106 | 117 | 2568 | 411 | 550 |  |  |  |  |  |  |  |  |
| 39.41 | 0  | 0  | 23 | 0  | 161 | 95  | 93  | 31  | 2708 | 496 | 518 |  |  |  |  |  |  |  |  |
| 39.50 | 13 | 0  | 36 | 0  | 205 | 142 | 137 | 46  | 3050 | 428 | 647 |  |  |  |  |  |  |  |  |
| 39.61 | 0  | 25 | 47 | 0  | 171 | 112 | 147 | 90  | 3384 | 324 | 875 |  |  |  |  |  |  |  |  |

|       |    |    |    |    |     |     |     |     |      |     |     |  |  |  |  |  |  |  |
|-------|----|----|----|----|-----|-----|-----|-----|------|-----|-----|--|--|--|--|--|--|--|
| 39.71 | 11 | 0  | 29 | 0  | 188 | 79  | 207 | 234 | 3005 | 117 | 823 |  |  |  |  |  |  |  |
| 39.81 | 0  | 17 | 22 | 0  | 166 | 6   | 238 | 163 | 2418 | 191 | 623 |  |  |  |  |  |  |  |
| 39.91 | 13 | 20 | 24 | 0  | 220 | 55  | 150 | 205 | 2283 | 191 | 464 |  |  |  |  |  |  |  |
| 40.01 | 14 | 0  | 20 | 11 | 153 | 57  | 109 | 21  | 2104 | 485 | 396 |  |  |  |  |  |  |  |
| 40.11 | 0  | 0  | 0  | 0  | 201 | 63  | 101 | 90  | 2124 | 260 | 419 |  |  |  |  |  |  |  |
| 40.20 | 0  | 0  | 18 | 0  | 154 | 71  | 8   | 0   | 2284 | 395 | 517 |  |  |  |  |  |  |  |
| 40.31 | 0  | 0  | 31 | 5  | 187 | 120 | 80  | 43  | 2313 | 227 | 508 |  |  |  |  |  |  |  |
| 40.41 | 0  | 0  | 23 | 0  | 185 | 51  | 80  | 162 | 2501 | 384 | 511 |  |  |  |  |  |  |  |
| 40.50 | 16 | 0  | 38 | 6  | 225 | 85  | 82  | 123 | 2643 | 371 | 503 |  |  |  |  |  |  |  |
| 40.61 | 0  | 10 | 21 | 0  | 210 | 0   | 0   | 110 | 3012 | 303 | 627 |  |  |  |  |  |  |  |
| 40.71 | 12 | 9  | 16 | 0  | 229 | 141 | 139 | 51  | 3206 | 420 | 590 |  |  |  |  |  |  |  |
| 40.81 | 11 | 0  | 46 | 0  | 171 | 60  | 91  | 188 | 3020 | 230 | 609 |  |  |  |  |  |  |  |
| 40.91 | 0  | 0  | 31 | 0  | 213 | 129 | 278 | 196 | 2947 | 0   | 616 |  |  |  |  |  |  |  |
| 41.01 | 0  | 0  | 0  | 0  | 169 | 5   | 284 | 289 | 2518 | 241 | 538 |  |  |  |  |  |  |  |
| 41.11 | 8  | 0  | 9  | 0  | 241 | 70  | 131 | 252 | 2425 | 0   | 432 |  |  |  |  |  |  |  |
| 41.21 | 8  | 0  | 40 | 0  | 203 | 90  | 58  | 131 | 2316 | 8   | 471 |  |  |  |  |  |  |  |
| 41.31 | 0  | 25 | 21 | 0  | 219 | 87  | 114 | 119 | 2343 | 363 | 467 |  |  |  |  |  |  |  |
| 41.41 | 0  | 23 | 42 | 0  | 214 | 123 | 94  | 35  | 2431 | 316 | 463 |  |  |  |  |  |  |  |
| 41.51 | 9  | 7  | 34 | 0  | 224 | 104 | 57  | 261 | 2294 | 365 | 505 |  |  |  |  |  |  |  |
| 41.61 | 28 | 20 | 16 | 0  | 201 | 116 | 80  | 205 | 2381 | 357 | 479 |  |  |  |  |  |  |  |
| 41.71 | 0  | 22 | 45 | 0  | 208 | 98  | 94  | 123 | 2313 | 500 | 487 |  |  |  |  |  |  |  |
| 41.80 | 0  | 12 | 18 | 0  | 215 | 122 | 147 | 109 | 2543 | 382 | 546 |  |  |  |  |  |  |  |
| 41.91 | 0  | 16 | 31 | 0  | 211 | 112 | 125 | 137 | 2546 | 399 | 595 |  |  |  |  |  |  |  |
| 42.01 | 0  | 16 | 22 | 0  | 178 | 56  | 147 | 123 | 2572 | 62  | 546 |  |  |  |  |  |  |  |
| 42.11 | 32 | 8  | 28 | 0  | 169 | 17  | 140 | 156 | 2509 | 100 | 511 |  |  |  |  |  |  |  |
| 42.20 | 4  | 7  | 25 | 0  | 206 | 47  | 262 | 104 | 2299 | 129 | 504 |  |  |  |  |  |  |  |
| 42.31 | 0  | 12 | 31 | 10 | 177 | 281 | 79  | 149 | 2176 | 186 | 477 |  |  |  |  |  |  |  |
| 42.41 | 0  | 0  | 6  | 0  | 218 | 192 | 25  | 197 | 2358 | 325 | 504 |  |  |  |  |  |  |  |
| 42.50 | 10 | 19 | 33 | 0  | 212 | 82  | 136 | 163 | 2334 | 252 | 515 |  |  |  |  |  |  |  |
| 42.61 | 11 | 0  | 18 | 0  | 160 | 64  | 154 | 65  | 2564 | 486 | 472 |  |  |  |  |  |  |  |
| 42.71 | 0  | 8  | 19 | 0  | 201 | 42  | 121 | 82  | 2667 | 477 | 479 |  |  |  |  |  |  |  |
| 42.80 | 0  | 14 | 27 | 0  | 195 | 96  | 19  | 125 | 2737 | 434 | 558 |  |  |  |  |  |  |  |
| 42.91 | 27 | 17 | 24 | 0  | 244 | 80  | 86  | 184 | 3070 | 517 | 689 |  |  |  |  |  |  |  |
| 43.01 | 14 | 0  | 24 | 28 | 230 | 43  | 190 | 125 | 3124 | 236 | 801 |  |  |  |  |  |  |  |
| 43.11 | 10 | 31 | 48 | 0  | 186 | 55  | 203 | 362 | 2577 | 0   | 656 |  |  |  |  |  |  |  |
| 43.21 | 0  | 0  | 16 | 17 | 136 | 61  | 174 | 382 | 2053 | 0   | 555 |  |  |  |  |  |  |  |
| 43.30 | 14 | 12 | 22 | 0  | 163 | 92  | 194 | 190 | 2038 | 190 | 554 |  |  |  |  |  |  |  |
| 43.41 | 0  | 21 | 26 | 0  | 188 | 73  | 154 | 187 | 1949 | 84  | 447 |  |  |  |  |  |  |  |
| 43.51 | 0  | 0  | 20 | 0  | 193 | 45  | 136 | 89  | 1887 | 227 | 421 |  |  |  |  |  |  |  |
| 43.61 | 10 | 19 | 46 | 0  | 201 | 131 | 69  | 119 | 2081 | 440 | 420 |  |  |  |  |  |  |  |
| 43.70 | 7  | 0  | 41 | 0  | 164 | 80  | 43  | 23  | 2045 | 371 | 439 |  |  |  |  |  |  |  |
| 43.81 | 0  | 0  | 13 | 0  | 154 | 83  | 89  | 73  | 1975 | 575 | 447 |  |  |  |  |  |  |  |
| 43.90 | 10 | 11 | 25 | 0  | 163 | 139 | 112 | 193 | 2069 | 469 | 465 |  |  |  |  |  |  |  |
| 44.01 | 0  | 4  | 30 | 0  | 207 | 64  | 46  | 33  | 2275 | 551 | 483 |  |  |  |  |  |  |  |
| 44.11 | 5  | 9  | 41 | 0  | 173 | 96  | 59  | 67  | 2335 | 546 | 520 |  |  |  |  |  |  |  |
| 44.20 | 14 | 0  | 37 | 0  | 184 | 64  | 149 | 87  | 2668 | 399 | 621 |  |  |  |  |  |  |  |
| 44.31 | 5  | 18 | 35 | 0  | 243 | 112 | 178 | 129 | 2962 | 282 | 769 |  |  |  |  |  |  |  |
| 44.41 | 21 | 10 | 27 | 0  | 169 | 73  | 145 | 256 | 2566 | 232 | 729 |  |  |  |  |  |  |  |
| 44.50 | 10 | 8  | 25 | 0  | 142 | 62  | 256 | 247 | 2026 | 0   | 571 |  |  |  |  |  |  |  |
| 44.61 | 6  | 12 | 17 | 0  | 179 | 18  | 115 | 247 | 2196 | 155 | 481 |  |  |  |  |  |  |  |
| 44.71 | 14 | 0  | 30 | 0  | 178 | 80  | 133 | 185 | 2299 | 219 | 543 |  |  |  |  |  |  |  |
| 44.81 | 19 | 7  | 5  | 0  | 186 | 107 | 138 | 201 | 2477 | 366 | 609 |  |  |  |  |  |  |  |
| 44.91 | 18 | 7  | 25 | 0  | 175 | 95  | 67  | 0   | 2565 | 440 | 527 |  |  |  |  |  |  |  |
| 45.01 | 0  | 4  | 20 | 0  | 174 | 111 | 101 | 152 | 2539 | 451 | 444 |  |  |  |  |  |  |  |
| 45.10 | 0  | 0  | 12 | 0  | 209 | 35  | 67  | 162 | 2604 | 395 | 517 |  |  |  |  |  |  |  |
| 45.21 | 24 | 7  | 37 | 0  | 186 | 118 | 162 | 125 | 2522 | 382 | 536 |  |  |  |  |  |  |  |
| 45.31 | 0  | 0  | 31 | 0  | 178 | 116 | 173 | 77  | 2446 | 330 | 534 |  |  |  |  |  |  |  |
| 45.41 | 7  | 7  | 33 | 0  | 223 | 58  | 103 | 162 | 2634 | 392 | 593 |  |  |  |  |  |  |  |

|       |    |    |    |    |     |     |     |     |      |     |      |  |  |  |  |  |  |  |
|-------|----|----|----|----|-----|-----|-----|-----|------|-----|------|--|--|--|--|--|--|--|
| 45.51 | 11 | 14 | 31 | 0  | 206 | 108 | 102 | 157 | 2969 | 314 | 635  |  |  |  |  |  |  |  |
| 45.61 | 0  | 10 | 19 | 0  | 171 | 118 | 251 | 248 | 2766 | 234 | 703  |  |  |  |  |  |  |  |
| 45.70 | 16 | 16 | 27 | 0  | 169 | 43  | 171 | 279 | 2542 | 80  | 883  |  |  |  |  |  |  |  |
| 45.81 | 10 | 0  | 27 | 0  | 198 | 123 | 182 | 278 | 2155 | 32  | 817  |  |  |  |  |  |  |  |
| 45.91 | 15 | 5  | 20 | 0  | 165 | 104 | 105 | 261 | 1740 | 74  | 627  |  |  |  |  |  |  |  |
| 46.01 | 17 | 16 | 22 | 0  | 135 | 15  | 151 | 199 | 1665 | 122 | 555  |  |  |  |  |  |  |  |
| 46.11 | 17 | 23 | 44 | 8  | 172 | 73  | 121 | 174 | 1661 | 89  | 420  |  |  |  |  |  |  |  |
| 46.21 | 20 | 4  | 40 | 0  | 133 | 55  | 112 | 119 | 1879 | 323 | 471  |  |  |  |  |  |  |  |
| 46.31 | 26 | 36 | 21 | 0  | 137 | 62  | 95  | 75  | 2141 | 269 | 483  |  |  |  |  |  |  |  |
| 46.41 | 0  | 23 | 30 | 0  | 146 | 54  | 165 | 35  | 2226 | 267 | 588  |  |  |  |  |  |  |  |
| 46.51 | 0  | 0  | 44 | 0  | 200 | 84  | 18  | 178 | 2233 | 280 | 512  |  |  |  |  |  |  |  |
| 46.61 | 29 | 28 | 30 | 0  | 188 | 93  | 36  | 0   | 2243 | 337 | 512  |  |  |  |  |  |  |  |
| 46.71 | 0  | 9  | 14 | 0  | 198 | 129 | 103 | 60  | 2373 | 490 | 574  |  |  |  |  |  |  |  |
| 46.81 | 0  | 14 | 26 | 0  | 201 | 73  | 41  | 71  | 2269 | 398 | 574  |  |  |  |  |  |  |  |
| 46.91 | 26 | 16 | 32 | 0  | 147 | 68  | 64  | 208 | 2400 | 501 | 545  |  |  |  |  |  |  |  |
| 47.01 | 28 | 26 | 23 | 0  | 186 | 147 | 97  | 154 | 2445 | 537 | 560  |  |  |  |  |  |  |  |
| 47.11 | 13 | 0  | 5  | 0  | 201 | 142 | 182 | 139 | 2519 | 386 | 576  |  |  |  |  |  |  |  |
| 47.20 | 0  | 8  | 33 | 0  | 218 | 113 | 226 | 25  | 2678 | 503 | 571  |  |  |  |  |  |  |  |
| 47.30 | 0  | 21 | 27 | 0  | 173 | 48  | 78  | 122 | 2727 | 368 | 557  |  |  |  |  |  |  |  |
| 47.41 | 4  | 23 | 32 | 0  | 180 | 110 | 164 | 159 | 2789 | 376 | 575  |  |  |  |  |  |  |  |
| 47.50 | 0  | 13 | 41 | 0  | 233 | 53  | 93  | 185 | 2966 | 483 | 653  |  |  |  |  |  |  |  |
| 47.61 | 36 | 7  | 37 | 0  | 229 | 126 | 233 | 192 | 2881 | 222 | 654  |  |  |  |  |  |  |  |
| 47.71 | 16 | 9  | 35 | 0  | 263 | 87  | 256 | 227 | 2512 | 273 | 649  |  |  |  |  |  |  |  |
| 47.80 | 16 | 25 | 34 | 15 | 170 | 38  | 282 | 360 | 2070 | 44  | 518  |  |  |  |  |  |  |  |
| 47.91 | 0  | 9  | 41 | 0  | 182 | 38  | 210 | 300 | 1769 | 0   | 538  |  |  |  |  |  |  |  |
| 48.01 | 0  | 19 | 26 | 0  | 139 | 73  | 180 | 99  | 1822 | 0   | 513  |  |  |  |  |  |  |  |
| 48.11 | 0  | 5  | 14 | 0  | 123 | 28  | 192 | 212 | 1786 | 0   | 537  |  |  |  |  |  |  |  |
| 48.20 | 27 | 10 | 36 | 0  | 103 | 56  | 116 | 159 | 1880 | 109 | 608  |  |  |  |  |  |  |  |
| 48.31 | 26 | 10 | 38 | 0  | 165 | 119 | 160 | 101 | 1965 | 230 | 633  |  |  |  |  |  |  |  |
| 48.41 | 11 | 0  | 26 | 0  | 131 | 140 | 100 | 79  | 2031 | 191 | 645  |  |  |  |  |  |  |  |
| 48.51 | 0  | 16 | 37 | 0  | 175 | 90  | 108 | 43  | 1939 | 409 | 532  |  |  |  |  |  |  |  |
| 48.60 | 19 | 0  | 29 | 0  | 189 | 187 | 67  | 78  | 2131 | 404 | 573  |  |  |  |  |  |  |  |
| 48.70 | 0  | 6  | 50 | 0  | 196 | 178 | 75  | 131 | 2389 | 488 | 588  |  |  |  |  |  |  |  |
| 48.81 | 17 | 0  | 52 | 0  | 203 | 134 | 163 | 117 | 2398 | 582 | 597  |  |  |  |  |  |  |  |
| 48.90 | 13 | 0  | 39 | 0  | 214 | 157 | 140 | 124 | 2454 | 429 | 693  |  |  |  |  |  |  |  |
| 49.01 | 7  | 7  | 21 | 0  | 215 | 158 | 160 | 131 | 2547 | 282 | 599  |  |  |  |  |  |  |  |
| 49.11 | 10 | 0  | 17 | 0  | 191 | 136 | 207 | 107 | 2893 | 201 | 620  |  |  |  |  |  |  |  |
| 49.21 | 16 | 0  | 9  | 0  | 253 | 80  | 87  | 143 | 3348 | 447 | 574  |  |  |  |  |  |  |  |
| 49.31 | 13 | 0  | 5  | 0  | 204 | 70  | 137 | 148 | 2867 | 526 | 604  |  |  |  |  |  |  |  |
| 49.41 | 0  | 15 | 23 | 0  | 198 | 87  | 56  | 136 | 2753 | 362 | 597  |  |  |  |  |  |  |  |
| 49.51 | 21 | 0  | 40 | 0  | 186 | 60  | 30  | 216 | 2682 | 445 | 682  |  |  |  |  |  |  |  |
| 49.61 | 15 | 7  | 55 | 0  | 213 | 130 | 27  | 149 | 2922 | 537 | 721  |  |  |  |  |  |  |  |
| 49.71 | 26 | 0  | 6  | 0  | 223 | 74  | 142 | 181 | 3383 | 235 | 1009 |  |  |  |  |  |  |  |
| 49.81 | 0  | 28 | 35 | 0  | 264 | 58  | 210 | 306 | 3334 | 156 | 1008 |  |  |  |  |  |  |  |
| 49.91 | 18 | 8  | 23 | 0  | 210 | 57  | 236 | 348 | 2663 | 0   | 790  |  |  |  |  |  |  |  |
| 50.01 | 16 | 0  | 8  | 0  | 180 | 113 | 214 | 220 | 2427 | 71  | 741  |  |  |  |  |  |  |  |
| 50.11 | 36 | 11 | 35 | 0  | 192 | 76  | 204 | 291 | 2218 | 142 | 608  |  |  |  |  |  |  |  |
| 50.21 | 28 | 20 | 26 | 0  | 216 | 82  | 152 | 110 | 2252 | 467 | 566  |  |  |  |  |  |  |  |
| 50.31 | 0  | 5  | 25 | 0  | 193 | 45  | 112 | 113 | 2358 | 349 | 554  |  |  |  |  |  |  |  |
| 50.41 | 0  | 0  | 63 | 0  | 181 | 55  | 158 | 125 | 2369 | 136 | 621  |  |  |  |  |  |  |  |
| 50.51 | 0  | 0  | 0  | 0  | 113 | 48  | 38  | 0   | 2371 | 343 | 638  |  |  |  |  |  |  |  |
| 50.61 | 31 | 18 | 46 | 0  | 183 | 85  | 63  | 10  | 2442 | 374 | 628  |  |  |  |  |  |  |  |
| 50.70 | 5  | 32 | 26 | 0  | 248 | 81  | 167 | 86  | 2422 | 381 | 607  |  |  |  |  |  |  |  |
| 50.81 | 10 | 24 | 52 | 0  | 166 | 108 | 179 | 196 | 2637 | 271 | 761  |  |  |  |  |  |  |  |
| 50.91 | 0  | 8  | 20 | 0  | 201 | 75  | 150 | 194 | 3111 | 318 | 968  |  |  |  |  |  |  |  |
| 51.01 | 0  | 0  | 23 | 0  | 169 | 24  | 181 | 207 | 2810 | 90  | 851  |  |  |  |  |  |  |  |
| 51.11 | 0  | 25 | 35 | 0  | 168 | 77  | 279 | 250 | 2313 | 78  | 720  |  |  |  |  |  |  |  |
| 51.21 | 31 | 14 | 51 | 0  | 124 | 4   | 244 | 308 | 1967 | 38  | 626  |  |  |  |  |  |  |  |

|       |    |    |    |    |     |     |     |     |      |     |     |  |  |  |  |  |  |  |  |
|-------|----|----|----|----|-----|-----|-----|-----|------|-----|-----|--|--|--|--|--|--|--|--|
| 51.31 | 20 | 0  | 12 | 0  | 123 | 18  | 233 | 325 | 1857 | 0   | 617 |  |  |  |  |  |  |  |  |
| 51.40 | 0  | 13 | 5  | 0  | 179 | 101 | 114 | 216 | 1906 | 41  | 664 |  |  |  |  |  |  |  |  |
| 51.51 | 27 | 0  | 15 | 23 | 127 | 34  | 185 | 219 | 2121 | 279 | 703 |  |  |  |  |  |  |  |  |
| 51.61 | 0  | 13 | 24 | 0  | 157 | 38  | 106 | 8   | 2204 | 400 | 833 |  |  |  |  |  |  |  |  |
| 51.71 | 0  | 12 | 37 | 0  | 180 | 35  | 98  | 109 | 2236 | 363 | 791 |  |  |  |  |  |  |  |  |
| 51.81 | 13 | 25 | 32 | 0  | 228 | 87  | 115 | 208 | 2313 | 279 | 729 |  |  |  |  |  |  |  |  |
| 51.91 | 16 | 0  | 23 | 10 | 213 | 30  | 62  | 75  | 2369 | 394 | 611 |  |  |  |  |  |  |  |  |
| 52.01 | 0  | 12 | 17 | 15 | 168 | 51  | 133 | 207 | 2415 | 398 | 690 |  |  |  |  |  |  |  |  |
| 52.10 | 30 | 0  | 39 | 0  | 174 | 91  | 74  | 153 | 2511 | 475 | 668 |  |  |  |  |  |  |  |  |
| 52.21 | 9  | 0  | 30 | 0  | 222 | 105 | 115 | 289 | 2571 | 480 | 748 |  |  |  |  |  |  |  |  |
| 52.31 | 11 | 6  | 25 | 0  | 195 | 93  | 107 | 209 | 2571 | 450 | 750 |  |  |  |  |  |  |  |  |
| 52.41 | 10 | 0  | 12 | 0  | 192 | 77  | 157 | 90  | 2746 | 245 | 700 |  |  |  |  |  |  |  |  |
| 52.51 | 15 | 25 | 23 | 8  | 215 | 98  | 170 | 132 | 2597 | 373 | 688 |  |  |  |  |  |  |  |  |
| 52.61 | 9  | 15 | 18 | 0  | 177 | 147 | 215 | 207 | 2740 | 492 | 662 |  |  |  |  |  |  |  |  |
| 52.71 | 6  | 0  | 5  | 0  | 207 | 84  | 124 | 129 | 2792 | 312 | 686 |  |  |  |  |  |  |  |  |
| 52.81 | 0  | 11 | 45 | 0  | 170 | 30  | 156 | 107 | 3030 | 515 | 679 |  |  |  |  |  |  |  |  |
| 52.91 | 56 | 33 | 48 | 0  | 203 | 57  | 110 | 229 | 3154 | 141 | 739 |  |  |  |  |  |  |  |  |
| 53.01 | 7  | 0  | 19 | 0  | 166 | 29  | 75  | 194 | 3474 | 213 | 791 |  |  |  |  |  |  |  |  |
| 53.11 | 14 | 0  | 32 | 0  | 192 | 86  | 260 | 273 | 2944 | 112 | 717 |  |  |  |  |  |  |  |  |
| 53.20 | 35 | 23 | 7  | 0  | 215 | 15  | 256 | 283 | 2517 | 0   | 574 |  |  |  |  |  |  |  |  |
| 53.31 | 5  | 11 | 34 | 0  | 180 | 22  | 225 | 310 | 2313 | 56  | 561 |  |  |  |  |  |  |  |  |
| 53.41 | 24 | 15 | 34 | 0  | 204 | 59  | 134 | 297 | 2232 | 0   | 541 |  |  |  |  |  |  |  |  |
| 53.51 | 16 | 32 | 32 | 0  | 170 | 24  | 162 | 161 | 2211 | 112 | 522 |  |  |  |  |  |  |  |  |
| 53.61 | 16 | 15 | 15 | 0  | 134 | 22  | 224 | 280 | 2144 | 0   | 469 |  |  |  |  |  |  |  |  |
| 53.71 | 10 | 25 | 30 | 0  | 161 | 71  | 128 | 107 | 2283 | 251 | 472 |  |  |  |  |  |  |  |  |
| 53.81 | 0  | 23 | 39 | 0  | 135 | 39  | 144 | 152 | 2326 | 198 | 542 |  |  |  |  |  |  |  |  |
| 53.91 | 0  | 12 | 21 | 0  | 182 | 44  | 164 | 152 | 2363 | 342 | 469 |  |  |  |  |  |  |  |  |
| 54.01 | 14 | 0  | 35 | 0  | 160 | 59  | 37  | 48  | 2484 | 369 | 532 |  |  |  |  |  |  |  |  |
| 54.11 | 11 | 0  | 27 | 0  | 188 | 117 | 42  | 136 | 2600 | 288 | 510 |  |  |  |  |  |  |  |  |
| 54.21 | 0  | 0  | 38 | 0  | 183 | 78  | 39  | 163 | 2569 | 506 | 520 |  |  |  |  |  |  |  |  |
| 54.31 | 26 | 11 | 42 | 0  | 211 | 104 | 194 | 118 | 2628 | 329 | 497 |  |  |  |  |  |  |  |  |
| 54.41 | 5  | 11 | 23 | 0  | 188 | 50  | 185 | 243 | 2797 | 277 | 513 |  |  |  |  |  |  |  |  |
| 54.50 | 10 | 26 | 24 | 0  | 208 | 97  | 53  | 58  | 2649 | 499 | 432 |  |  |  |  |  |  |  |  |
| 54.61 | 12 | 11 | 10 | 0  | 224 | 20  | 73  | 175 | 2749 | 472 | 497 |  |  |  |  |  |  |  |  |
| 54.70 | 11 | 4  | 25 | 0  | 241 | 113 | 134 | 229 | 2697 | 543 | 505 |  |  |  |  |  |  |  |  |
| 54.81 | 12 | 21 | 41 | 0  | 211 | 95  | 91  | 159 | 2753 | 472 | 499 |  |  |  |  |  |  |  |  |
| 54.91 | 9  | 16 | 38 | 0  | 206 | 124 | 69  | 146 | 2781 | 168 | 516 |  |  |  |  |  |  |  |  |
| 55.00 | 8  | 12 | 27 | 0  | 220 | 115 | 194 | 229 | 2836 | 384 | 507 |  |  |  |  |  |  |  |  |
| 55.11 | 12 | 4  | 28 | 0  | 202 | 81  | 72  | 97  | 2803 | 150 | 513 |  |  |  |  |  |  |  |  |
| 55.21 | 13 | 0  | 43 | 0  | 227 | 125 | 118 | 117 | 2795 | 415 | 457 |  |  |  |  |  |  |  |  |
| 55.30 | 9  | 8  | 27 | 0  | 163 | 131 | 205 | 181 | 2840 | 497 | 562 |  |  |  |  |  |  |  |  |
| 55.41 | 5  | 16 | 7  | 20 | 225 | 101 | 126 | 170 | 3057 | 400 | 483 |  |  |  |  |  |  |  |  |
| 55.51 | 17 | 0  | 24 | 0  | 244 | 84  | 183 | 159 | 3569 | 161 | 638 |  |  |  |  |  |  |  |  |
| 55.60 | 5  | 0  | 15 | 0  | 203 | 35  | 119 | 267 | 3499 | 226 | 613 |  |  |  |  |  |  |  |  |
| 55.71 | 20 | 22 | 32 | 0  | 250 | 80  | 235 | 204 | 3060 | 43  | 555 |  |  |  |  |  |  |  |  |
| 55.80 | 0  | 18 | 21 | 11 | 256 | 20  | 225 | 230 | 2779 | 0   | 505 |  |  |  |  |  |  |  |  |
| 55.91 | 0  | 25 | 26 | 0  | 201 | 0   | 195 | 344 | 2557 | 12  | 477 |  |  |  |  |  |  |  |  |
| 56.01 | 11 | 11 | 13 | 0  | 159 | 59  | 299 | 295 | 2575 | 202 | 484 |  |  |  |  |  |  |  |  |
| 56.10 | 13 | 15 | 37 | 0  | 185 | 26  | 178 | 193 | 2749 | 54  | 457 |  |  |  |  |  |  |  |  |
| 56.21 | 17 | 18 | 40 | 0  | 183 | 4   | 191 | 194 | 2740 | 55  | 395 |  |  |  |  |  |  |  |  |
| 56.31 | 0  | 0  | 22 | 0  | 205 | 42  | 179 | 170 | 2365 | 179 | 421 |  |  |  |  |  |  |  |  |
| 56.41 | 14 | 9  | 0  | 0  | 170 | 48  | 194 | 204 | 2422 | 260 | 454 |  |  |  |  |  |  |  |  |
| 56.51 | 0  | 22 | 16 | 0  | 145 | 40  | 87  | 161 | 2506 | 146 | 431 |  |  |  |  |  |  |  |  |
| 56.61 | 12 | 0  | 28 | 0  | 187 | 72  | 43  | 103 | 2550 | 276 | 443 |  |  |  |  |  |  |  |  |
| 56.71 | 12 | 20 | 31 | 0  | 156 | 97  | 135 | 244 | 2704 | 397 | 428 |  |  |  |  |  |  |  |  |
| 56.81 | 0  | 0  | 19 | 0  | 210 | 54  | 114 | 102 | 2874 | 194 | 461 |  |  |  |  |  |  |  |  |
| 56.91 | 0  | 17 | 30 | 11 | 254 | 89  | 103 | 158 | 2951 | 496 | 475 |  |  |  |  |  |  |  |  |
| 57.00 | 16 | 0  | 30 | 0  | 219 | 99  | 8   | 159 | 2983 | 152 | 486 |  |  |  |  |  |  |  |  |

|       |    |    |    |    |     |     |     |     |      |     |     |  |  |  |  |  |  |  |
|-------|----|----|----|----|-----|-----|-----|-----|------|-----|-----|--|--|--|--|--|--|--|
| 57.11 | 10 | 6  | 27 | 0  | 245 | 58  | 85  | 68  | 2745 | 368 | 477 |  |  |  |  |  |  |  |
| 57.21 | 12 | 19 | 21 | 29 | 200 | 84  | 108 | 127 | 2819 | 544 | 468 |  |  |  |  |  |  |  |
| 57.31 | 0  | 0  | 19 | 0  | 220 | 135 | 144 | 190 | 2830 | 430 | 460 |  |  |  |  |  |  |  |
| 57.40 | 9  | 9  | 33 | 0  | 236 | 117 | 88  | 193 | 3023 | 303 | 509 |  |  |  |  |  |  |  |
| 57.51 | 10 | 28 | 24 | 18 | 176 | 82  | 90  | 53  | 3087 | 303 | 469 |  |  |  |  |  |  |  |
| 57.60 | 21 | 0  | 24 | 0  | 226 | 90  | 90  | 167 | 3441 | 157 | 571 |  |  |  |  |  |  |  |
| 57.71 | 13 | 0  | 16 | 40 | 242 | 84  | 169 | 79  | 3739 | 375 | 561 |  |  |  |  |  |  |  |
| 57.81 | 9  | 18 | 44 | 0  | 253 | 92  | 123 | 252 | 3923 | 206 | 620 |  |  |  |  |  |  |  |
| 57.91 | 0  | 11 | 40 | 0  | 185 | 35  | 129 | 305 | 3599 | 173 | 578 |  |  |  |  |  |  |  |
| 58.01 | 6  | 22 | 32 | 0  | 163 | 73  | 191 | 367 | 3308 | 117 | 553 |  |  |  |  |  |  |  |
| 58.11 | 0  | 0  | 17 | 0  | 257 | 15  | 242 | 322 | 2941 | 85  | 587 |  |  |  |  |  |  |  |
| 58.21 | 9  | 25 | 44 | 0  | 254 | 47  | 222 | 270 | 2705 | 80  | 514 |  |  |  |  |  |  |  |
| 58.31 | 0  | 13 | 16 | 0  | 218 | 101 | 142 | 213 | 2595 | 178 | 466 |  |  |  |  |  |  |  |
| 58.41 | 18 | 0  | 23 | 0  | 193 | 12  | 224 | 151 | 2610 | 145 | 464 |  |  |  |  |  |  |  |
| 58.51 | 18 | 0  | 31 | 11 | 162 | 28  | 100 | 164 | 2539 | 11  | 480 |  |  |  |  |  |  |  |
| 58.61 | 0  | 14 | 40 | 5  | 133 | 35  | 32  | 121 | 2496 | 22  | 452 |  |  |  |  |  |  |  |
| 58.70 | 0  | 0  | 23 | 0  | 172 | 68  | 91  | 181 | 2331 | 113 | 451 |  |  |  |  |  |  |  |
| 58.81 | 0  | 0  | 16 | 0  | 156 | 58  | 113 | 249 | 2191 | 325 | 428 |  |  |  |  |  |  |  |
| 58.90 | 19 | 27 | 37 | 0  | 188 | 17  | 118 | 175 | 2313 | 325 | 434 |  |  |  |  |  |  |  |
| 59.01 | 5  | 21 | 27 | 0  | 209 | 114 | 69  | 108 | 2476 | 346 | 462 |  |  |  |  |  |  |  |
| 59.11 | 17 | 9  | 34 | 0  | 181 | 82  | 96  | 45  | 2556 | 198 | 451 |  |  |  |  |  |  |  |
| 59.20 | 14 | 16 | 25 | 0  | 144 | 81  | 67  | 166 | 2612 | 286 | 464 |  |  |  |  |  |  |  |
| 59.31 | 9  | 0  | 27 | 0  | 258 | 44  | 229 | 129 | 2638 | 171 | 478 |  |  |  |  |  |  |  |
| 59.40 | 15 | 19 | 38 | 0  | 201 | 27  | 42  | 144 | 2622 | 285 | 495 |  |  |  |  |  |  |  |
| 59.51 | 12 | 14 | 35 | 0  | 275 | 95  | 64  | 149 | 2670 | 379 | 481 |  |  |  |  |  |  |  |
| 59.61 | 7  | 0  | 20 | 0  | 210 | 76  | 25  | 94  | 2726 | 350 | 464 |  |  |  |  |  |  |  |
| 59.70 | 28 | 24 | 47 | 0  | 218 | 73  | 105 | 90  | 2805 | 211 | 481 |  |  |  |  |  |  |  |
| 59.81 | 0  | 10 | 27 | 0  | 185 | 56  | 163 | 140 | 2860 | 472 | 500 |  |  |  |  |  |  |  |
| 59.90 | 11 | 26 | 27 | 0  | 231 | 33  | 98  | 135 | 2765 | 183 | 467 |  |  |  |  |  |  |  |
| 60.01 | 27 | 25 | 37 | 0  | 185 | 60  | 152 | 123 | 2960 | 400 | 480 |  |  |  |  |  |  |  |
| 60.11 | 0  | 0  | 32 | 0  | 190 | 101 | 193 | 113 | 2873 | 183 | 553 |  |  |  |  |  |  |  |
| 60.21 | 0  | 13 | 16 | 0  | 250 | 62  | 201 | 109 | 3082 | 361 | 486 |  |  |  |  |  |  |  |
| 60.31 | 0  | 9  | 20 | 0  | 242 | 83  | 175 | 93  | 3133 | 444 | 512 |  |  |  |  |  |  |  |
| 60.41 | 0  | 18 | 29 | 12 | 231 | 144 | 111 | 96  | 3267 | 167 | 532 |  |  |  |  |  |  |  |
| 60.51 | 0  | 0  | 46 | 0  | 211 | 88  | 135 | 252 | 3507 | 294 | 621 |  |  |  |  |  |  |  |
| 60.61 | 14 | 24 | 24 | 0  | 241 | 80  | 163 | 215 | 3638 | 302 | 603 |  |  |  |  |  |  |  |
| 60.71 | 0  | 0  | 22 | 5  | 232 | 80  | 102 | 301 | 3393 | 237 | 614 |  |  |  |  |  |  |  |
| 60.81 | 0  | 0  | 13 | 0  | 235 | 36  | 233 | 284 | 2760 | 119 | 584 |  |  |  |  |  |  |  |
| 60.91 | 14 | 16 | 38 | 0  | 217 | 45  | 215 | 352 | 2496 | 0   | 518 |  |  |  |  |  |  |  |
| 61.00 | 23 | 26 | 41 | 0  | 131 | 0   | 175 | 164 | 2327 | 40  | 445 |  |  |  |  |  |  |  |
| 61.11 | 5  | 4  | 21 | 0  | 219 | 87  | 246 | 191 | 2192 | 136 | 471 |  |  |  |  |  |  |  |
| 61.21 | 15 | 12 | 25 | 0  | 207 | 45  | 168 | 270 | 2215 | 170 | 437 |  |  |  |  |  |  |  |
| 61.31 | 0  | 11 | 29 | 0  | 176 | 81  | 173 | 195 | 2181 | 0   | 431 |  |  |  |  |  |  |  |
| 61.41 | 0  | 34 | 27 | 0  | 200 | 43  | 133 | 175 | 2206 | 74  | 458 |  |  |  |  |  |  |  |
| 61.50 | 7  | 0  | 17 | 0  | 127 | 65  | 93  | 223 | 2262 | 113 | 395 |  |  |  |  |  |  |  |
| 61.61 | 21 | 0  | 32 | 0  | 223 | 26  | 56  | 201 | 2323 | 502 | 434 |  |  |  |  |  |  |  |
| 61.71 | 0  | 0  | 5  | 0  | 176 | 31  | 140 | 102 | 2401 | 217 | 479 |  |  |  |  |  |  |  |
| 61.81 | 0  | 4  | 35 | 0  | 180 | 27  | 101 | 34  | 2626 | 454 | 460 |  |  |  |  |  |  |  |
| 61.91 | 4  | 11 | 24 | 0  | 240 | 121 | 160 | 203 | 2788 | 251 | 477 |  |  |  |  |  |  |  |
| 62.01 | 19 | 6  | 35 | 0  | 211 | 81  | 151 | 203 | 2687 | 299 | 444 |  |  |  |  |  |  |  |
| 62.11 | 0  | 0  | 15 | 0  | 206 | 58  | 151 | 38  | 2619 | 246 | 474 |  |  |  |  |  |  |  |
| 62.20 | 0  | 8  | 28 | 0  | 191 | 52  | 130 | 92  | 2722 | 215 | 439 |  |  |  |  |  |  |  |
| 62.31 | 30 | 15 | 13 | 0  | 213 | 73  | 201 | 147 | 2722 | 483 | 409 |  |  |  |  |  |  |  |
| 62.41 | 23 | 17 | 28 | 26 | 184 | 109 | 57  | 160 | 2733 | 234 | 421 |  |  |  |  |  |  |  |
| 62.51 | 13 | 31 | 30 | 0  | 187 | 80  | 222 | 122 | 2783 | 541 | 461 |  |  |  |  |  |  |  |
| 62.61 | 0  | 7  | 14 | 0  | 200 | 83  | 136 | 144 | 2891 | 313 | 494 |  |  |  |  |  |  |  |
| 62.70 | 0  | 12 | 44 | 0  | 175 | 126 | 116 | 77  | 2888 | 381 | 503 |  |  |  |  |  |  |  |
| 62.81 | 17 | 8  | 15 | 0  | 243 | 93  | 0   | 207 | 3061 | 430 | 544 |  |  |  |  |  |  |  |

|       |    |    |    |    |     |     |     |     |      |     |     |  |  |  |  |  |  |  |
|-------|----|----|----|----|-----|-----|-----|-----|------|-----|-----|--|--|--|--|--|--|--|
| 62.90 | 0  | 0  | 16 | 19 | 279 | 120 | 149 | 156 | 3088 | 393 | 497 |  |  |  |  |  |  |  |
| 63.01 | 24 | 25 | 24 | 0  | 250 | 101 | 149 | 110 | 3162 | 267 | 471 |  |  |  |  |  |  |  |
| 63.11 | 17 | 0  | 17 | 0  | 193 | 85  | 119 | 155 | 3133 | 245 | 551 |  |  |  |  |  |  |  |
| 63.20 | 0  | 10 | 41 | 0  | 208 | 114 | 112 | 170 | 3157 | 436 | 571 |  |  |  |  |  |  |  |
| 63.31 | 13 | 9  | 10 | 0  | 185 | 110 | 84  | 64  | 3186 | 252 | 534 |  |  |  |  |  |  |  |
| 63.40 | 0  | 8  | 15 | 0  | 209 | 85  | 74  | 113 | 3247 | 484 | 552 |  |  |  |  |  |  |  |
| 63.51 | 24 | 0  | 33 | 0  | 166 | 30  | 64  | 111 | 3263 | 498 | 597 |  |  |  |  |  |  |  |
| 63.60 | 13 | 11 | 26 | 0  | 253 | 122 | 120 | 46  | 3467 | 363 | 500 |  |  |  |  |  |  |  |
| 63.71 | 0  | 0  | 28 | 0  | 225 | 155 | 105 | 57  | 3731 | 446 | 612 |  |  |  |  |  |  |  |
| 63.81 | 0  | 17 | 50 | 0  | 272 | 95  | 62  | 221 | 4136 | 126 | 741 |  |  |  |  |  |  |  |
| 63.91 | 0  | 7  | 14 | 0  | 276 | 110 | 183 | 262 | 3783 | 124 | 724 |  |  |  |  |  |  |  |
| 64.00 | 0  | 6  | 17 | 0  | 232 | 73  | 291 | 281 | 3261 | 75  | 601 |  |  |  |  |  |  |  |
| 64.11 | 0  | 19 | 16 | 0  | 177 | 103 | 328 | 454 | 2816 | 104 | 554 |  |  |  |  |  |  |  |
| 64.21 | 0  | 4  | 23 | 0  | 244 | 66  | 327 | 333 | 2472 | 0   | 498 |  |  |  |  |  |  |  |
| 64.31 | 25 | 0  | 26 | 0  | 181 | 54  | 195 | 267 | 2399 | 0   | 472 |  |  |  |  |  |  |  |
| 64.41 | 4  | 5  | 14 | 0  | 186 | 110 | 70  | 218 | 2501 | 27  | 464 |  |  |  |  |  |  |  |
| 64.51 | 21 | 6  | 22 | 0  | 167 | 115 | 36  | 210 | 2615 | 98  | 513 |  |  |  |  |  |  |  |
| 64.61 | 0  | 11 | 24 | 0  | 165 | 134 | 70  | 186 | 2709 | 297 | 411 |  |  |  |  |  |  |  |
| 64.71 | 10 | 0  | 34 | 0  | 159 | 55  | 200 | 58  | 2635 | 374 | 448 |  |  |  |  |  |  |  |
| 64.81 | 0  | 8  | 9  | 0  | 233 | 105 | 127 | 106 | 2610 | 433 | 469 |  |  |  |  |  |  |  |
| 64.91 | 10 | 0  | 6  | 0  | 168 | 97  | 127 | 169 | 2685 | 392 | 435 |  |  |  |  |  |  |  |
| 65.01 | 0  | 0  | 25 | 0  | 201 | 85  | 54  | 168 | 2836 | 225 | 478 |  |  |  |  |  |  |  |
| 65.10 | 9  | 0  | 28 | 0  | 205 | 97  | 175 | 59  | 2902 | 225 | 508 |  |  |  |  |  |  |  |
| 65.21 | 0  | 30 | 32 | 0  | 222 | 97  | 83  | 249 | 2830 | 133 | 474 |  |  |  |  |  |  |  |
| 65.31 | 0  | 0  | 32 | 0  | 169 | 124 | 69  | 184 | 2910 | 162 | 513 |  |  |  |  |  |  |  |
| 65.40 | 0  | 0  | 24 | 0  | 239 | 119 | 81  | 76  | 2796 | 226 | 494 |  |  |  |  |  |  |  |
| 65.51 | 0  | 16 | 26 | 0  | 248 | 99  | 130 | 184 | 2859 | 488 | 460 |  |  |  |  |  |  |  |
| 65.61 | 0  | 0  | 16 | 0  | 181 | 85  | 112 | 85  | 2926 | 220 | 521 |  |  |  |  |  |  |  |
| 65.70 | 29 | 11 | 29 | 0  | 217 | 74  | 122 | 190 | 2865 | 334 | 518 |  |  |  |  |  |  |  |
| 65.81 | 0  | 0  | 0  | 0  | 200 | 74  | 62  | 0   | 2942 | 371 | 477 |  |  |  |  |  |  |  |
| 65.91 | 5  | 28 | 42 | 0  | 231 | 88  | 80  | 70  | 2959 | 289 | 524 |  |  |  |  |  |  |  |
| 66.01 | 0  | 0  | 36 | 0  | 255 | 63  | 105 | 156 | 2968 | 509 | 542 |  |  |  |  |  |  |  |
| 66.11 | 6  | 22 | 24 | 34 | 238 | 135 | 151 | 51  | 3106 | 417 | 505 |  |  |  |  |  |  |  |
| 66.21 | 0  | 12 | 17 | 0  | 243 | 70  | 62  | 149 | 3007 | 404 | 467 |  |  |  |  |  |  |  |
| 66.31 | 6  | 14 | 20 | 0  | 179 | 91  | 96  | 114 | 3110 | 545 | 525 |  |  |  |  |  |  |  |
| 66.41 | 0  | 0  | 38 | 0  | 226 | 98  | 173 | 131 | 3218 | 304 | 527 |  |  |  |  |  |  |  |
| 66.51 | 0  | 0  | 25 | 0  | 264 | 86  | 173 | 57  | 3184 | 313 | 515 |  |  |  |  |  |  |  |
| 66.61 | 25 | 7  | 42 | 0  | 274 | 37  | 18  | 214 | 3445 | 530 | 592 |  |  |  |  |  |  |  |
| 66.71 | 13 | 0  | 35 | 0  | 241 | 95  | 119 | 70  | 3831 | 303 | 617 |  |  |  |  |  |  |  |
| 66.81 | 4  | 0  | 27 | 0  | 221 | 46  | 121 | 201 | 3800 | 189 | 604 |  |  |  |  |  |  |  |
| 66.91 | 0  | 14 | 29 | 0  | 204 | 47  | 178 | 179 | 3335 | 220 | 590 |  |  |  |  |  |  |  |
| 67.00 | 0  | 0  | 12 | 10 | 244 | 85  | 194 | 321 | 3058 | 263 | 609 |  |  |  |  |  |  |  |
| 67.11 | 19 | 17 | 18 | 0  | 228 | 57  | 227 | 160 | 2851 | 108 | 548 |  |  |  |  |  |  |  |
| 67.21 | 20 | 0  | 35 | 0  | 202 | 25  | 203 | 252 | 2661 | 103 | 533 |  |  |  |  |  |  |  |
| 67.31 | 12 | 9  | 43 | 0  | 189 | 60  | 164 | 271 | 2456 | 0   | 481 |  |  |  |  |  |  |  |
| 67.41 | 0  | 9  | 17 | 0  | 184 | 49  | 235 | 289 | 2554 | 163 | 487 |  |  |  |  |  |  |  |
| 67.50 | 23 | 0  | 9  | 0  | 168 | 40  | 263 | 338 | 2474 | 0   | 440 |  |  |  |  |  |  |  |
| 67.61 | 31 | 20 | 20 | 0  | 149 | 67  | 124 | 125 | 2459 | 78  | 451 |  |  |  |  |  |  |  |
| 67.71 | 8  | 26 | 18 | 0  | 166 | 12  | 188 | 189 | 2550 | 179 | 463 |  |  |  |  |  |  |  |
| 67.81 | 11 | 17 | 29 | 0  | 160 | 87  | 225 | 160 | 2610 | 246 | 457 |  |  |  |  |  |  |  |
| 67.91 | 16 | 30 | 32 | 0  | 149 | 105 | 121 | 184 | 2673 | 266 | 435 |  |  |  |  |  |  |  |
| 68.00 | 0  | 15 | 19 | 0  | 234 | 73  | 156 | 182 | 2767 | 291 | 490 |  |  |  |  |  |  |  |
| 68.11 | 0  | 0  | 19 | 0  | 215 | 69  | 135 | 192 | 2883 | 320 | 477 |  |  |  |  |  |  |  |
| 68.21 | 4  | 6  | 36 | 27 | 176 | 92  | 23  | 127 | 2720 | 344 | 553 |  |  |  |  |  |  |  |
| 68.31 | 0  | 0  | 28 | 0  | 216 | 110 | 63  | 137 | 2790 | 417 | 502 |  |  |  |  |  |  |  |
| 68.41 | 28 | 0  | 29 | 0  | 187 | 48  | 64  | 118 | 2943 | 248 | 479 |  |  |  |  |  |  |  |
| 68.51 | 8  | 15 | 20 | 0  | 211 | 79  | 59  | 172 | 3164 | 358 | 535 |  |  |  |  |  |  |  |
| 68.61 | 13 | 10 | 44 | 0  | 250 | 78  | 82  | 100 | 3000 | 238 | 505 |  |  |  |  |  |  |  |

|       |    |    |    |    |     |     |     |     |      |     |     |  |  |  |  |  |  |  |
|-------|----|----|----|----|-----|-----|-----|-----|------|-----|-----|--|--|--|--|--|--|--|
| 68.71 | 0  | 10 | 31 | 0  | 179 | 37  | 149 | 105 | 2884 | 310 | 468 |  |  |  |  |  |  |  |
| 68.81 | 5  | 10 | 33 | 0  | 188 | 59  | 234 | 227 | 2972 | 398 | 519 |  |  |  |  |  |  |  |
| 68.90 | 11 | 0  | 28 | 0  | 170 | 67  | 184 | 189 | 3095 | 218 | 544 |  |  |  |  |  |  |  |
| 69.01 | 10 | 0  | 21 | 0  | 214 | 77  | 147 | 103 | 2987 | 152 | 512 |  |  |  |  |  |  |  |
| 69.10 | 0  | 0  | 14 | 0  | 247 | 74  | 75  | 118 | 3046 | 300 | 568 |  |  |  |  |  |  |  |
| 69.21 | 0  | 15 | 29 | 0  | 182 | 51  | 91  | 194 | 2997 | 283 | 512 |  |  |  |  |  |  |  |
| 69.31 | 0  | 22 | 26 | 0  | 188 | 44  | 194 | 147 | 3027 | 391 | 570 |  |  |  |  |  |  |  |
| 69.41 | 11 | 0  | 18 | 0  | 246 | 81  | 221 | 185 | 3079 | 424 | 527 |  |  |  |  |  |  |  |
| 69.51 | 7  | 6  | 23 | 0  | 187 | 19  | 165 | 101 | 3061 | 400 | 510 |  |  |  |  |  |  |  |
| 69.61 | 6  | 0  | 11 | 0  | 242 | 76  | 170 | 68  | 3006 | 184 | 532 |  |  |  |  |  |  |  |
| 69.71 | 28 | 15 | 53 | 7  | 204 | 75  | 126 | 121 | 3112 | 498 | 513 |  |  |  |  |  |  |  |
| 69.81 | 6  | 0  | 7  | 0  | 185 | 46  | 126 | 84  | 2989 | 382 | 518 |  |  |  |  |  |  |  |
| 69.91 | 5  | 0  | 24 | 0  | 213 | 122 | 108 | 54  | 3137 | 449 | 548 |  |  |  |  |  |  |  |
| 70.01 | 11 | 0  | 37 | 0  | 167 | 97  | 106 | 167 | 3147 | 310 | 532 |  |  |  |  |  |  |  |
| 70.10 | 23 | 6  | 26 | 0  | 221 | 110 | 110 | 183 | 3288 | 304 | 521 |  |  |  |  |  |  |  |
| 70.21 | 7  | 0  | 12 | 0  | 263 | 59  | 118 | 39  | 3353 | 322 | 560 |  |  |  |  |  |  |  |
| 70.30 | 0  | 0  | 31 | 0  | 233 | 112 | 93  | 199 | 3420 | 423 | 578 |  |  |  |  |  |  |  |
| 70.41 | 9  | 21 | 12 | 0  | 241 | 133 | 90  | 78  | 3581 | 287 | 571 |  |  |  |  |  |  |  |
| 70.51 | 0  | 8  | 29 | 0  | 264 | 166 | 132 | 194 | 3564 | 114 | 609 |  |  |  |  |  |  |  |
| 70.61 | 18 | 11 | 26 | 0  | 250 | 139 | 140 | 124 | 3779 | 309 | 630 |  |  |  |  |  |  |  |
| 70.71 | 23 | 8  | 16 | 0  | 227 | 112 | 140 | 185 | 3706 | 237 | 647 |  |  |  |  |  |  |  |
| 70.81 | 15 | 0  | 26 | 0  | 243 | 52  | 158 | 296 | 3507 | 348 | 625 |  |  |  |  |  |  |  |
| 70.91 | 0  | 21 | 30 | 0  | 280 | 67  | 191 | 293 | 3271 | 0   | 638 |  |  |  |  |  |  |  |
| 71.01 | 10 | 8  | 31 | 7  | 201 | 122 | 119 | 191 | 3084 | 18  | 552 |  |  |  |  |  |  |  |
| 71.10 | 0  | 13 | 0  | 0  | 229 | 32  | 208 | 307 | 3029 | 27  | 522 |  |  |  |  |  |  |  |
| 71.21 | 18 | 24 | 39 | 0  | 186 | 0   | 127 | 288 | 2885 | 0   | 584 |  |  |  |  |  |  |  |
| 71.31 | 16 | 18 | 24 | 0  | 233 | 11  | 159 | 243 | 2754 | 161 | 532 |  |  |  |  |  |  |  |
| 71.41 | 36 | 14 | 24 | 0  | 198 | 41  | 277 | 253 | 2527 | 0   | 501 |  |  |  |  |  |  |  |
| 71.51 | 8  | 4  | 15 | 0  | 174 | 63  | 167 | 244 | 2597 | 40  | 486 |  |  |  |  |  |  |  |
| 71.61 | 26 | 17 | 12 | 0  | 183 | 70  | 184 | 251 | 2585 | 92  | 491 |  |  |  |  |  |  |  |
| 71.71 | 12 | 0  | 15 | 0  | 199 | 82  | 222 | 243 | 2756 | 177 | 516 |  |  |  |  |  |  |  |
| 71.81 | 6  | 6  | 11 | 0  | 185 | 155 | 202 | 130 | 2886 | 147 | 502 |  |  |  |  |  |  |  |
| 71.91 | 8  | 0  | 31 | 0  | 207 | 73  | 151 | 194 | 2861 | 62  | 491 |  |  |  |  |  |  |  |
| 72.01 | 5  | 15 | 19 | 6  | 203 | 7   | 115 | 126 | 2882 | 236 | 499 |  |  |  |  |  |  |  |
| 72.11 | 12 | 0  | 8  | 0  | 214 | 48  | 156 | 157 | 2943 | 231 | 468 |  |  |  |  |  |  |  |
| 72.20 | 0  | 6  | 16 | 0  | 221 | 57  | 65  | 204 | 3097 | 434 | 547 |  |  |  |  |  |  |  |
| 72.31 | 0  | 0  | 29 | 0  | 228 | 120 | 188 | 177 | 3239 | 232 | 526 |  |  |  |  |  |  |  |
| 72.41 | 4  | 0  | 5  | 0  | 273 | 114 | 195 | 114 | 3297 | 335 | 494 |  |  |  |  |  |  |  |
| 72.51 | 0  | 6  | 42 | 15 | 201 | 106 | 53  | 133 | 3148 | 77  | 555 |  |  |  |  |  |  |  |
| 72.61 | 14 | 14 | 12 | 0  | 236 | 128 | 130 | 90  | 3293 | 163 | 491 |  |  |  |  |  |  |  |
| 72.70 | 5  | 10 | 34 | 0  | 258 | 107 | 34  | 66  | 3388 | 393 | 512 |  |  |  |  |  |  |  |
| 72.81 | 10 | 6  | 42 | 0  | 211 | 82  | 156 | 65  | 3472 | 422 | 528 |  |  |  |  |  |  |  |
| 72.90 | 0  | 20 | 34 | 0  | 231 | 78  | 173 | 109 | 3563 | 268 | 610 |  |  |  |  |  |  |  |
| 73.01 | 14 | 12 | 31 | 0  | 257 | 121 | 147 | 151 | 3528 | 160 | 549 |  |  |  |  |  |  |  |
| 73.11 | 13 | 7  | 29 | 0  | 303 | 123 | 123 | 107 | 3559 | 179 | 484 |  |  |  |  |  |  |  |
| 73.21 | 0  | 0  | 42 | 0  | 227 | 61  | 86  | 82  | 3628 | 469 | 586 |  |  |  |  |  |  |  |
| 73.31 | 21 | 16 | 14 | 0  | 260 | 43  | 67  | 131 | 3470 | 360 | 567 |  |  |  |  |  |  |  |
| 73.41 | 17 | 0  | 39 | 0  | 230 | 95  | 166 | 47  | 3627 | 300 | 606 |  |  |  |  |  |  |  |
| 73.50 | 0  | 9  | 37 | 0  | 260 | 114 | 100 | 105 | 3742 | 441 | 524 |  |  |  |  |  |  |  |
| 73.61 | 22 | 15 | 33 | 0  | 193 | 112 | 140 | 96  | 3630 | 326 | 558 |  |  |  |  |  |  |  |
| 73.71 | 0  | 0  | 46 | 0  | 302 | 129 | 114 | 131 | 3588 | 349 | 599 |  |  |  |  |  |  |  |
| 73.80 | 0  | 11 | 19 | 0  | 276 | 95  | 107 | 198 | 3741 | 609 | 601 |  |  |  |  |  |  |  |
| 73.91 | 6  | 0  | 40 | 0  | 241 | 147 | 167 | 102 | 3728 | 479 | 615 |  |  |  |  |  |  |  |
| 74.00 | 19 | 5  | 7  | 0  | 214 | 140 | 148 | 95  | 3767 | 39  | 545 |  |  |  |  |  |  |  |
| 74.11 | 10 | 6  | 37 | 0  | 243 | 122 | 158 | 139 | 3761 | 317 | 605 |  |  |  |  |  |  |  |
| 74.21 | 12 | 33 | 28 | 0  | 285 | 127 | 118 | 148 | 3832 | 418 | 603 |  |  |  |  |  |  |  |
| 74.31 | 27 | 20 | 31 | 0  | 267 | 70  | 126 | 232 | 3824 | 465 | 625 |  |  |  |  |  |  |  |
| 74.40 | 0  | 5  | 20 | 0  | 268 | 104 | 151 | 199 | 3684 | 102 | 607 |  |  |  |  |  |  |  |

|       |    |    |    |    |     |     |     |     |      |     |     |  |  |  |  |  |  |  |
|-------|----|----|----|----|-----|-----|-----|-----|------|-----|-----|--|--|--|--|--|--|--|
| 74.51 | 0  | 12 | 27 | 0  | 221 | 31  | 165 | 189 | 3646 | 246 | 663 |  |  |  |  |  |  |  |
| 74.61 | 0  | 14 | 30 | 0  | 260 | 27  | 240 | 285 | 3488 | 167 | 634 |  |  |  |  |  |  |  |
| 74.71 | 10 | 11 | 28 | 0  | 245 | 13  | 156 | 278 | 3432 | 101 | 586 |  |  |  |  |  |  |  |
| 74.81 | 15 | 0  | 25 | 0  | 259 | 61  | 200 | 243 | 3348 | 120 | 593 |  |  |  |  |  |  |  |
| 74.91 | 15 | 7  | 25 | 0  | 270 | 0   | 156 | 154 | 3305 | 35  | 614 |  |  |  |  |  |  |  |
| 75.01 | 21 | 9  | 27 | 0  | 201 | 54  | 215 | 215 | 3170 | 64  | 528 |  |  |  |  |  |  |  |
| 75.11 | 7  | 0  | 12 | 0  | 224 | 41  | 198 | 165 | 3143 | 97  | 562 |  |  |  |  |  |  |  |
| 75.20 | 26 | 15 | 44 | 0  | 256 | 81  | 237 | 186 | 2944 | 72  | 541 |  |  |  |  |  |  |  |
| 75.31 | 0  | 8  | 22 | 0  | 202 | 80  | 214 | 189 | 2945 | 15  | 499 |  |  |  |  |  |  |  |
| 75.40 | 12 | 13 | 23 | 0  | 228 | 24  | 145 | 266 | 2980 | 0   | 536 |  |  |  |  |  |  |  |
| 75.51 | 26 | 30 | 19 | 0  | 178 | 46  | 138 | 125 | 3000 | 71  | 542 |  |  |  |  |  |  |  |
| 75.61 | 0  | 15 | 21 | 0  | 227 | 28  | 100 | 189 | 3167 | 222 | 513 |  |  |  |  |  |  |  |
| 75.71 | 40 | 0  | 14 | 0  | 238 | 70  | 160 | 168 | 3146 | 151 | 528 |  |  |  |  |  |  |  |
| 75.80 | 0  | 0  | 11 | 10 | 176 | 24  | 73  | 154 | 3222 | 249 | 489 |  |  |  |  |  |  |  |
| 75.91 | 10 | 5  | 18 | 0  | 205 | 80  | 156 | 21  | 3054 | 334 | 562 |  |  |  |  |  |  |  |
| 76.00 | 0  | 8  | 26 | 0  | 203 | 41  | 126 | 157 | 3254 | 276 | 547 |  |  |  |  |  |  |  |
| 76.11 | 0  | 0  | 13 | 0  | 213 | 50  | 104 | 162 | 3156 | 191 | 541 |  |  |  |  |  |  |  |
| 76.21 | 0  | 5  | 25 | 0  | 285 | 102 | 122 | 90  | 3315 | 187 | 560 |  |  |  |  |  |  |  |
| 76.31 | 17 | 0  | 29 | 0  | 231 | 50  | 93  | 123 | 3514 | 185 | 548 |  |  |  |  |  |  |  |
| 76.41 | 22 | 21 | 30 | 0  | 231 | 38  | 97  | 154 | 3392 | 190 | 543 |  |  |  |  |  |  |  |
| 76.50 | 0  | 5  | 22 | 0  | 254 | 68  | 125 | 178 | 3438 | 269 | 548 |  |  |  |  |  |  |  |
| 76.61 | 24 | 0  | 29 | 0  | 256 | 44  | 88  | 103 | 3549 | 219 | 569 |  |  |  |  |  |  |  |
| 76.71 | 0  | 0  | 39 | 45 | 284 | 87  | 124 | 166 | 3540 | 411 | 560 |  |  |  |  |  |  |  |
| 76.81 | 15 | 9  | 26 | 0  | 258 | 75  | 127 | 140 | 3591 | 421 | 598 |  |  |  |  |  |  |  |
| 76.91 | 0  | 0  | 24 | 0  | 261 | 60  | 55  | 155 | 3650 | 277 | 548 |  |  |  |  |  |  |  |
| 77.00 | 11 | 7  | 26 | 0  | 282 | 57  | 92  | 90  | 3639 | 461 | 549 |  |  |  |  |  |  |  |
| 77.11 | 16 | 4  | 31 | 0  | 337 | 55  | 152 | 133 | 3699 | 362 | 588 |  |  |  |  |  |  |  |
| 77.20 | 5  | 0  | 19 | 0  | 296 | 102 | 174 | 82  | 3783 | 267 | 519 |  |  |  |  |  |  |  |
| 77.31 | 0  | 0  | 39 | 0  | 274 | 102 | 186 | 137 | 3845 | 337 | 557 |  |  |  |  |  |  |  |
| 77.41 | 0  | 0  | 23 | 0  | 281 | 82  | 100 | 22  | 3812 | 219 | 648 |  |  |  |  |  |  |  |
| 77.50 | 12 | 5  | 8  | 0  | 295 | 29  | 104 | 81  | 3768 | 221 | 552 |  |  |  |  |  |  |  |
| 77.61 | 11 | 10 | 23 | 0  | 300 | 37  | 90  | 153 | 3820 | 236 | 579 |  |  |  |  |  |  |  |
| 77.70 | 9  | 24 | 37 | 0  | 233 | 76  | 105 | 63  | 3891 | 237 | 586 |  |  |  |  |  |  |  |
| 77.81 | 9  | 0  | 35 | 0  | 286 | 47  | 93  | 128 | 3877 | 157 | 621 |  |  |  |  |  |  |  |
| 77.91 | 9  | 0  | 20 | 0  | 263 | 44  | 78  | 102 | 3956 | 247 | 644 |  |  |  |  |  |  |  |
| 78.01 | 0  | 9  | 46 | 0  | 279 | 79  | 157 | 95  | 4056 | 229 | 571 |  |  |  |  |  |  |  |
| 78.11 | 9  | 13 | 25 | 0  | 312 | 107 | 88  | 133 | 4301 | 427 | 634 |  |  |  |  |  |  |  |
| 78.20 | 17 | 14 | 18 | 0  | 264 | 48  | 182 | 165 | 4294 | 278 | 664 |  |  |  |  |  |  |  |
| 78.31 | 7  | 10 | 37 | 0  | 319 | 77  | 160 | 123 | 4264 | 346 | 636 |  |  |  |  |  |  |  |
| 78.41 | 0  | 6  | 26 | 0  | 266 | 67  | 129 | 170 | 4383 | 291 | 639 |  |  |  |  |  |  |  |
| 78.51 | 10 | 18 | 38 | 0  | 313 | 72  | 151 | 179 | 4290 | 189 | 665 |  |  |  |  |  |  |  |
| 78.61 | 0  | 0  | 20 | 0  | 337 | 49  | 221 | 157 | 4256 | 205 | 721 |  |  |  |  |  |  |  |
| 78.71 | 16 | 0  | 51 | 0  | 244 | 31  | 242 | 206 | 4282 | 101 | 687 |  |  |  |  |  |  |  |
| 78.81 | 5  | 0  | 35 | 0  | 255 | 82  | 174 | 99  | 4005 | 0   | 684 |  |  |  |  |  |  |  |
| 78.90 | 0  | 21 | 9  | 32 | 250 | 28  | 178 | 214 | 4024 | 178 | 637 |  |  |  |  |  |  |  |
| 79.01 | 0  | 0  | 42 | 0  | 268 | 39  | 76  | 166 | 3925 | 0   | 643 |  |  |  |  |  |  |  |
| 79.11 | 0  | 11 | 18 | 0  | 318 | 44  | 149 | 155 | 3985 | 126 | 609 |  |  |  |  |  |  |  |
| 79.21 | 15 | 6  | 10 | 0  | 233 | 60  | 184 | 260 | 3772 | 65  | 621 |  |  |  |  |  |  |  |
| 79.31 | 18 | 17 | 34 | 0  | 238 | 62  | 247 | 243 | 3673 | 188 | 630 |  |  |  |  |  |  |  |
| 79.40 | 0  | 0  | 47 | 0  | 269 | 50  | 224 | 166 | 3806 | 93  | 630 |  |  |  |  |  |  |  |
| 79.51 | 0  | 11 | 37 | 0  | 279 | 25  | 184 | 232 | 3725 | 129 | 641 |  |  |  |  |  |  |  |
| 79.61 | 4  | 0  | 15 | 0  | 308 | 85  | 216 | 244 | 3514 | 148 | 650 |  |  |  |  |  |  |  |
| 79.71 | 0  | 11 | 25 | 0  | 268 | 90  | 225 | 137 | 3591 | 156 | 603 |  |  |  |  |  |  |  |
| 79.81 | 0  | 0  | 31 | 0  | 242 | 67  | 170 | 47  | 3799 | 177 | 569 |  |  |  |  |  |  |  |
| 79.91 | 4  | 0  | 28 | 0  | 266 | 56  | 224 | 205 | 3705 | 186 | 570 |  |  |  |  |  |  |  |
| 80.01 | 9  | 7  | 39 | 0  | 305 | 99  | 228 | 160 | 3581 | 385 | 567 |  |  |  |  |  |  |  |
| 80.11 | 0  | 16 | 59 | 0  | 236 | 51  | 93  | 137 | 3459 | 70  | 569 |  |  |  |  |  |  |  |
| 80.21 | 0  | 16 | 59 | 47 | 308 | 70  | 61  | 45  | 3489 | 48  | 639 |  |  |  |  |  |  |  |

|       |    |    |    |    |     |     |     |     |      |     |     |  |  |  |  |  |  |  |
|-------|----|----|----|----|-----|-----|-----|-----|------|-----|-----|--|--|--|--|--|--|--|
| 80.30 | 12 | 6  | 27 | 0  | 294 | 83  | 73  | 135 | 3640 | 128 | 587 |  |  |  |  |  |  |  |
| 80.41 | 12 | 9  | 21 | 0  | 294 | 92  | 116 | 173 | 3728 | 273 | 552 |  |  |  |  |  |  |  |
| 80.51 | 17 | 0  | 18 | 11 | 284 | 73  | 40  | 186 | 3874 | 313 | 577 |  |  |  |  |  |  |  |
| 80.60 | 0  | 0  | 21 | 34 | 263 | 81  | 104 | 47  | 3835 | 213 | 573 |  |  |  |  |  |  |  |
| 80.71 | 15 | 11 | 31 | 0  | 305 | 69  | 57  | 202 | 3746 | 393 | 606 |  |  |  |  |  |  |  |
| 80.80 | 8  | 10 | 36 | 0  | 241 | 67  | 132 | 151 | 3720 | 224 | 605 |  |  |  |  |  |  |  |
| 80.91 | 17 | 0  | 13 | 0  | 264 | 121 | 65  | 196 | 3758 | 391 | 607 |  |  |  |  |  |  |  |
| 81.00 | 7  | 21 | 36 | 0  | 258 | 105 | 192 | 141 | 3716 | 214 | 581 |  |  |  |  |  |  |  |
| 81.11 | 15 | 0  | 45 | 0  | 196 | 65  | 10  | 80  | 3865 | 483 | 569 |  |  |  |  |  |  |  |
| 81.20 | 5  | 8  | 24 | 0  | 281 | 24  | 14  | 79  | 3857 | 399 | 596 |  |  |  |  |  |  |  |
| 81.31 | 30 | 19 | 27 | 0  | 315 | 78  | 125 | 0   | 3976 | 256 | 616 |  |  |  |  |  |  |  |
| 81.41 | 15 | 29 | 31 | 0  | 255 | 103 | 106 | 132 | 4163 | 496 | 625 |  |  |  |  |  |  |  |
| 81.51 | 14 | 26 | 39 | 0  | 318 | 50  | 94  | 56  | 4079 | 356 | 654 |  |  |  |  |  |  |  |
| 81.60 | 8  | 0  | 28 | 0  | 293 | 112 | 156 | 150 | 4138 | 566 | 650 |  |  |  |  |  |  |  |
| 81.71 | 22 | 18 | 34 | 0  | 268 | 78  | 100 | 93  | 4280 | 180 | 641 |  |  |  |  |  |  |  |
| 81.81 | 0  | 14 | 22 | 6  | 292 | 100 | 64  | 204 | 4376 | 317 | 676 |  |  |  |  |  |  |  |
| 81.91 | 23 | 0  | 21 | 0  | 280 | 76  | 180 | 121 | 4500 | 164 | 653 |  |  |  |  |  |  |  |
| 82.01 | 14 | 0  | 19 | 0  | 282 | 55  | 77  | 125 | 4380 | 392 | 661 |  |  |  |  |  |  |  |
| 82.11 | 0  | 0  | 45 | 0  | 276 | 72  | 166 | 162 | 4398 | 358 | 671 |  |  |  |  |  |  |  |
| 82.21 | 7  | 0  | 24 | 0  | 291 | 107 | 107 | 198 | 4384 | 231 | 717 |  |  |  |  |  |  |  |
| 82.31 | 0  | 0  | 28 | 0  | 328 | 70  | 109 | 138 | 4647 | 487 | 673 |  |  |  |  |  |  |  |
| 82.40 | 8  | 9  | 34 | 0  | 331 | 68  | 188 | 121 | 4669 | 338 | 732 |  |  |  |  |  |  |  |
| 82.51 | 10 | 4  | 22 | 11 | 312 | 79  | 123 | 201 | 4628 | 361 | 733 |  |  |  |  |  |  |  |
| 82.61 | 21 | 0  | 50 | 0  | 353 | 44  | 67  | 108 | 4738 | 321 | 769 |  |  |  |  |  |  |  |
| 82.71 | 0  | 0  | 37 | 0  | 318 | 60  | 74  | 57  | 4780 | 317 | 673 |  |  |  |  |  |  |  |
| 82.81 | 8  | 16 | 38 | 0  | 370 | 85  | 71  | 192 | 4926 | 327 | 737 |  |  |  |  |  |  |  |
| 82.90 | 14 | 22 | 51 | 0  | 290 | 73  | 124 | 232 | 4916 | 137 | 727 |  |  |  |  |  |  |  |
| 83.01 | 29 | 29 | 31 | 0  | 331 | 79  | 268 | 176 | 4932 | 308 | 727 |  |  |  |  |  |  |  |
| 83.10 | 11 | 9  | 35 | 0  | 299 | 40  | 100 | 222 | 4670 | 109 | 740 |  |  |  |  |  |  |  |
| 83.21 | 0  | 0  | 22 | 26 | 318 | 60  | 142 | 161 | 4685 | 119 | 710 |  |  |  |  |  |  |  |
| 83.31 | 7  | 0  | 31 | 0  | 327 | 26  | 180 | 294 | 4658 | 105 | 688 |  |  |  |  |  |  |  |
| 83.41 | 12 | 16 | 8  | 0  | 337 | 41  | 180 | 144 | 4641 | 206 | 721 |  |  |  |  |  |  |  |
| 83.51 | 18 | 13 | 26 | 0  | 274 | 62  | 228 | 161 | 4559 | 111 | 723 |  |  |  |  |  |  |  |
| 83.61 | 11 | 15 | 57 | 0  | 280 | 0   | 152 | 291 | 4582 | 23  | 645 |  |  |  |  |  |  |  |
| 83.71 | 0  | 19 | 15 | 0  | 315 | 134 | 223 | 212 | 4365 | 58  | 646 |  |  |  |  |  |  |  |
| 83.80 | 0  | 7  | 34 | 22 | 296 | 82  | 237 | 255 | 4378 | 273 | 619 |  |  |  |  |  |  |  |
| 83.91 | 25 | 14 | 27 | 0  | 329 | 62  | 234 | 225 | 4150 | 168 | 588 |  |  |  |  |  |  |  |
| 84.01 | 0  | 0  | 36 | 16 | 266 | 43  | 237 | 227 | 4211 | 295 | 645 |  |  |  |  |  |  |  |
| 84.11 | 0  | 16 | 45 | 0  | 307 | 42  | 122 | 214 | 4027 | 0   | 668 |  |  |  |  |  |  |  |
| 84.20 | 9  | 16 | 50 | 0  | 300 | 71  | 173 | 210 | 4246 | 55  | 633 |  |  |  |  |  |  |  |
| 84.31 | 5  | 17 | 20 | 0  | 295 | 46  | 138 | 138 | 3975 | 278 | 565 |  |  |  |  |  |  |  |
| 84.40 | 12 | 0  | 34 | 0  | 232 | 71  | 116 | 167 | 3954 | 174 | 637 |  |  |  |  |  |  |  |
| 84.51 | 18 | 5  | 26 | 0  | 209 | 23  | 187 | 163 | 3916 | 15  | 566 |  |  |  |  |  |  |  |
| 84.61 | 11 | 8  | 30 | 0  | 283 | 40  | 162 | 207 | 3897 | 77  | 545 |  |  |  |  |  |  |  |
| 84.71 | 0  | 0  | 27 | 0  | 248 | 55  | 169 | 302 | 3713 | 133 | 579 |  |  |  |  |  |  |  |
| 84.81 | 0  | 0  | 38 | 0  | 272 | 9   | 187 | 286 | 3798 | 164 | 578 |  |  |  |  |  |  |  |
| 84.91 | 0  | 0  | 52 | 0  | 225 | 45  | 82  | 116 | 3895 | 217 | 614 |  |  |  |  |  |  |  |
| 85.01 | 10 | 0  | 48 | 0  | 292 | 46  | 181 | 217 | 3917 | 113 | 607 |  |  |  |  |  |  |  |
| 85.11 | 14 | 19 | 33 | 0  | 255 | 56  | 108 | 186 | 3810 | 121 | 538 |  |  |  |  |  |  |  |
| 85.20 | 14 | 0  | 35 | 0  | 260 | 41  | 113 | 107 | 3768 | 164 | 578 |  |  |  |  |  |  |  |
| 85.31 | 22 | 22 | 36 | 0  | 260 | 64  | 178 | 125 | 3853 | 204 | 580 |  |  |  |  |  |  |  |
| 85.40 | 0  | 8  | 41 | 0  | 247 | 84  | 75  | 384 | 3887 | 87  | 607 |  |  |  |  |  |  |  |
| 85.51 | 0  | 0  | 19 | 0  | 326 | 63  | 181 | 725 | 3837 | 78  | 612 |  |  |  |  |  |  |  |
| 85.60 | 0  | 0  | 36 | 12 | 279 | 13  | 105 | 229 | 3916 | 133 | 543 |  |  |  |  |  |  |  |
| 85.71 | 22 | 0  | 22 | 0  | 297 | 71  | 170 | 164 | 4098 | 236 | 573 |  |  |  |  |  |  |  |
| 85.80 | 19 | 0  | 30 | 0  | 245 | 69  | 133 | 124 | 3985 | 218 | 562 |  |  |  |  |  |  |  |
| 85.91 | 14 | 20 | 17 | 0  | 245 | 54  | 141 | 101 | 4041 | 309 | 594 |  |  |  |  |  |  |  |
| 86.01 | 0  | 11 | 24 | 18 | 304 | 55  | 140 | 214 | 4121 | 189 | 615 |  |  |  |  |  |  |  |

|       |    |    |    |    |     |     |     |     |      |     |     |  |  |  |  |  |  |  |
|-------|----|----|----|----|-----|-----|-----|-----|------|-----|-----|--|--|--|--|--|--|--|
| 86.11 | 11 | 6  | 27 | 0  | 283 | 40  | 156 | 185 | 4160 | 123 | 646 |  |  |  |  |  |  |  |
| 86.21 | 0  | 0  | 31 | 0  | 258 | 40  | 74  | 251 | 4330 | 94  | 621 |  |  |  |  |  |  |  |
| 86.31 | 17 | 6  | 28 | 0  | 317 | 204 | 144 | 52  | 4286 | 335 | 640 |  |  |  |  |  |  |  |
| 86.41 | 17 | 0  | 22 | 0  | 321 | 164 | 213 | 128 | 4278 | 308 | 634 |  |  |  |  |  |  |  |
| 86.51 | 0  | 0  | 9  | 0  | 270 | 60  | 129 | 41  | 4331 | 207 | 554 |  |  |  |  |  |  |  |
| 86.61 | 15 | 21 | 25 | 0  | 284 | 66  | 158 | 224 | 4558 | 67  | 617 |  |  |  |  |  |  |  |
| 86.70 | 32 | 0  | 22 | 0  | 274 | 62  | 157 | 103 | 4411 | 347 | 634 |  |  |  |  |  |  |  |
| 86.81 | 0  | 5  | 32 | 0  | 330 | 84  | 221 | 170 | 4618 | 420 | 651 |  |  |  |  |  |  |  |
| 86.91 | 0  | 15 | 39 | 0  | 295 | 79  | 86  | 106 | 4690 | 226 | 612 |  |  |  |  |  |  |  |
| 87.01 | 22 | 8  | 32 | 0  | 372 | 91  | 215 | 179 | 4583 | 117 | 643 |  |  |  |  |  |  |  |
| 87.10 | 0  | 0  | 25 | 0  | 325 | 83  | 77  | 243 | 4806 | 288 | 636 |  |  |  |  |  |  |  |
| 87.21 | 0  | 0  | 24 | 0  | 322 | 72  | 155 | 87  | 4742 | 271 | 608 |  |  |  |  |  |  |  |
| 87.30 | 6  | 28 | 33 | 0  | 325 | 76  | 55  | 182 | 4712 | 271 | 683 |  |  |  |  |  |  |  |
| 87.41 | 6  | 0  | 31 | 0  | 310 | 68  | 135 | 260 | 4797 | 231 | 671 |  |  |  |  |  |  |  |
| 87.51 | 5  | 0  | 31 | 0  | 282 | 59  | 83  | 127 | 4689 | 46  | 698 |  |  |  |  |  |  |  |
| 87.60 | 8  | 5  | 11 | 0  | 323 | 47  | 14  | 223 | 4725 | 342 | 610 |  |  |  |  |  |  |  |
| 87.71 | 8  | 0  | 5  | 0  | 265 | 97  | 174 | 177 | 4779 | 241 | 655 |  |  |  |  |  |  |  |
| 87.81 | 19 | 10 | 26 | 0  | 336 | 84  | 149 | 186 | 4628 | 206 | 633 |  |  |  |  |  |  |  |
| 87.91 | 0  | 0  | 32 | 0  | 336 | 61  | 149 | 205 | 4928 | 86  | 642 |  |  |  |  |  |  |  |
| 88.01 | 23 | 6  | 61 | 65 | 349 | 98  | 127 | 240 | 5160 | 270 | 694 |  |  |  |  |  |  |  |
| 88.10 | 18 | 12 | 35 | 0  | 379 | 28  | 177 | 159 | 4952 | 282 | 647 |  |  |  |  |  |  |  |
| 88.20 | 0  | 0  | 21 | 0  | 335 | 51  | 106 | 289 | 4996 | 47  | 644 |  |  |  |  |  |  |  |
| 88.31 | 0  | 14 | 33 | 0  | 292 | 0   | 133 | 215 | 5040 | 208 | 679 |  |  |  |  |  |  |  |
| 88.40 | 0  | 10 | 22 | 0  | 342 | 33  | 138 | 298 | 5136 | 203 | 616 |  |  |  |  |  |  |  |
| 88.51 | 24 | 0  | 41 | 0  | 294 | 69  | 136 | 166 | 5055 | 201 | 650 |  |  |  |  |  |  |  |
| 88.61 | 0  | 20 | 29 | 0  | 305 | 14  | 210 | 291 | 4923 | 174 | 634 |  |  |  |  |  |  |  |
| 88.71 | 5  | 5  | 50 | 0  | 326 | 72  | 150 | 202 | 5042 | 369 | 645 |  |  |  |  |  |  |  |
| 88.81 | 31 | 4  | 12 | 0  | 284 | 53  | 100 | 274 | 4848 | 245 | 636 |  |  |  |  |  |  |  |
| 88.91 | 40 | 19 | 32 | 0  | 342 | 0   | 159 | 146 | 4767 | 213 | 611 |  |  |  |  |  |  |  |
| 89.01 | 11 | 19 | 11 | 0  | 278 | 73  | 239 | 267 | 4807 | 254 | 609 |  |  |  |  |  |  |  |
| 89.11 | 0  | 0  | 37 | 0  | 299 | 61  | 183 | 146 | 4542 | 130 | 645 |  |  |  |  |  |  |  |
| 89.21 | 24 | 10 | 50 | 0  | 327 | 36  | 179 | 286 | 4582 | 177 | 608 |  |  |  |  |  |  |  |
| 89.31 | 22 | 7  | 44 | 0  | 270 | 26  | 137 | 234 | 4711 | 436 | 594 |  |  |  |  |  |  |  |
| 89.41 | 16 | 9  | 43 | 0  | 322 | 75  | 101 | 190 | 4512 | 324 | 609 |  |  |  |  |  |  |  |
| 89.51 | 0  | 0  | 27 | 0  | 244 | 25  | 193 | 108 | 4542 | 205 | 657 |  |  |  |  |  |  |  |
| 89.60 | 9  | 16 | 45 | 0  | 357 | 59  | 208 | 311 | 4491 | 184 | 608 |  |  |  |  |  |  |  |
| 89.71 | 15 | 18 | 45 | 0  | 264 | 45  | 120 | 201 | 4620 | 212 | 607 |  |  |  |  |  |  |  |
| 89.81 | 11 | 0  | 35 | 0  | 305 | 48  | 161 | 127 | 4534 | 266 | 675 |  |  |  |  |  |  |  |
| 89.91 | 14 | 32 | 39 | 0  | 327 | 51  | 153 | 178 | 4655 | 161 | 639 |  |  |  |  |  |  |  |
| 90.01 | 26 | 13 | 30 | 0  | 320 | 66  | 133 | 311 | 4489 | 304 | 661 |  |  |  |  |  |  |  |
| 90.11 | 0  | 6  | 23 | 0  | 284 | 53  | 222 | 119 | 4521 | 341 | 631 |  |  |  |  |  |  |  |
| 90.20 | 7  | 0  | 41 | 0  | 281 | 110 | 159 | 178 | 4743 | 288 | 638 |  |  |  |  |  |  |  |
| 90.31 | 12 | 0  | 21 | 0  | 274 | 89  | 208 | 214 | 4534 | 94  | 606 |  |  |  |  |  |  |  |
| 90.41 | 0  | 0  | 5  | 0  | 284 | 67  | 125 | 192 | 4372 | 168 | 578 |  |  |  |  |  |  |  |
| 90.50 | 18 | 10 | 38 | 0  | 341 | 56  | 156 | 209 | 4536 | 158 | 606 |  |  |  |  |  |  |  |
| 90.61 | 5  | 0  | 49 | 0  | 334 | 35  | 109 | 143 | 4697 | 52  | 696 |  |  |  |  |  |  |  |
| 90.70 | 13 | 15 | 45 | 6  | 354 | 94  | 228 | 251 | 4796 | 166 | 660 |  |  |  |  |  |  |  |
| 90.81 | 30 | 22 | 33 | 0  | 323 | 66  | 184 | 224 | 4798 | 291 | 637 |  |  |  |  |  |  |  |
| 90.90 | 22 | 25 | 61 | 0  | 351 | 91  | 50  | 153 | 4730 | 254 | 673 |  |  |  |  |  |  |  |
| 91.01 | 17 | 0  | 27 | 0  | 294 | 84  | 180 | 168 | 4641 | 145 | 648 |  |  |  |  |  |  |  |
| 91.11 | 26 | 0  | 30 | 0  | 270 | 61  | 221 | 228 | 4727 | 155 | 659 |  |  |  |  |  |  |  |
| 91.21 | 7  | 6  | 29 | 0  | 304 | 97  | 227 | 311 | 4789 | 350 | 599 |  |  |  |  |  |  |  |
| 91.31 | 0  | 0  | 24 | 0  | 315 | 108 | 221 | 160 | 4511 | 286 | 653 |  |  |  |  |  |  |  |
| 91.41 | 0  | 14 | 22 | 0  | 357 | 15  | 190 | 121 | 4578 | 196 | 663 |  |  |  |  |  |  |  |
| 91.51 | 0  | 0  | 27 | 0  | 341 | 15  | 109 | 216 | 4764 | 29  | 631 |  |  |  |  |  |  |  |
| 91.61 | 5  | 0  | 47 | 0  | 311 | 63  | 134 | 176 | 4783 | 148 | 639 |  |  |  |  |  |  |  |
| 91.71 | 0  | 0  | 25 | 0  | 331 | 47  | 103 | 198 | 4794 | 225 | 660 |  |  |  |  |  |  |  |
| 91.80 | 12 | 0  | 21 | 0  | 321 | 72  | 142 | 251 | 4968 | 237 | 701 |  |  |  |  |  |  |  |

|       |    |    |    |    |     |     |     |     |      |     |     |  |  |  |  |  |  |  |  |
|-------|----|----|----|----|-----|-----|-----|-----|------|-----|-----|--|--|--|--|--|--|--|--|
| 91.91 | 9  | 0  | 34 | 0  | 313 | 41  | 267 | 363 | 4919 | 206 | 686 |  |  |  |  |  |  |  |  |
| 92.01 | 19 | 18 | 22 | 0  | 329 | 62  | 141 | 260 | 5009 | 331 | 695 |  |  |  |  |  |  |  |  |
| 92.10 | 20 | 23 | 35 | 0  | 290 | 73  | 202 | 184 | 4909 | 109 | 665 |  |  |  |  |  |  |  |  |
| 92.21 | 17 | 19 | 54 | 0  | 320 | 0   | 100 | 220 | 4765 | 270 | 688 |  |  |  |  |  |  |  |  |
| 92.31 | 0  | 8  | 29 | 0  | 343 | 55  | 151 | 90  | 4811 | 518 | 693 |  |  |  |  |  |  |  |  |
| 92.40 | 11 | 13 | 40 | 0  | 333 | 50  | 212 | 165 | 4902 | 280 | 743 |  |  |  |  |  |  |  |  |
| 92.51 | 20 | 0  | 32 | 0  | 339 | 40  | 211 | 147 | 5074 | 124 | 725 |  |  |  |  |  |  |  |  |
| 92.61 | 0  | 11 | 47 | 0  | 361 | 46  | 196 | 255 | 5062 | 288 | 703 |  |  |  |  |  |  |  |  |
| 92.71 | 9  | 7  | 35 | 0  | 343 | 77  | 207 | 245 | 4922 | 293 | 737 |  |  |  |  |  |  |  |  |
| 92.80 | 17 | 7  | 38 | 0  | 320 | 33  | 161 | 284 | 4944 | 386 | 689 |  |  |  |  |  |  |  |  |
| 92.91 | 16 | 16 | 20 | 0  | 314 | 95  | 162 | 160 | 5304 | 319 | 679 |  |  |  |  |  |  |  |  |
| 93.01 | 10 | 34 | 48 | 0  | 370 | 79  | 135 | 191 | 5284 | 190 | 682 |  |  |  |  |  |  |  |  |
| 93.11 | 9  | 11 | 34 | 0  | 321 | 69  | 191 | 217 | 5144 | 231 | 676 |  |  |  |  |  |  |  |  |
| 93.21 | 7  | 0  | 40 | 0  | 329 | 72  | 208 | 203 | 5012 | 192 | 684 |  |  |  |  |  |  |  |  |
| 93.31 | 0  | 0  | 0  | 0  | 340 | 51  | 203 | 482 | 4882 | 115 | 676 |  |  |  |  |  |  |  |  |
| 93.40 | 8  | 0  | 29 | 0  | 381 | 73  | 143 | 299 | 5011 | 38  | 654 |  |  |  |  |  |  |  |  |
| 93.51 | 0  | 0  | 35 | 0  | 360 | 94  | 274 | 306 | 4941 | 454 | 677 |  |  |  |  |  |  |  |  |
| 93.60 | 6  | 0  | 28 | 0  | 404 | 28  | 213 | 185 | 4912 | 15  | 663 |  |  |  |  |  |  |  |  |
| 93.71 | 23 | 9  | 37 | 0  | 354 | 65  | 188 | 213 | 4852 | 238 | 668 |  |  |  |  |  |  |  |  |
| 93.81 | 25 | 8  | 29 | 0  | 327 | 40  | 124 | 241 | 4939 | 154 | 656 |  |  |  |  |  |  |  |  |
| 93.91 | 30 | 0  | 30 | 0  | 345 | 42  | 106 | 303 | 4709 | 0   | 616 |  |  |  |  |  |  |  |  |
| 94.01 | 0  | 8  | 35 | 0  | 322 | 88  | 162 | 277 | 4816 | 104 | 690 |  |  |  |  |  |  |  |  |
| 94.11 | 18 | 16 | 25 | 0  | 332 | 211 | 183 | 254 | 4800 | 154 | 596 |  |  |  |  |  |  |  |  |
| 94.21 | 0  | 0  | 21 | 0  | 283 | 65  | 110 | 194 | 4700 | 529 | 650 |  |  |  |  |  |  |  |  |
| 94.31 | 0  | 0  | 36 | 0  | 323 | 73  | 126 | 204 | 4753 | 137 | 673 |  |  |  |  |  |  |  |  |
| 94.41 | 0  | 0  | 11 | 0  | 320 | 81  | 250 | 278 | 4674 | 131 | 646 |  |  |  |  |  |  |  |  |
| 94.51 | 0  | 0  | 29 | 0  | 328 | 104 | 129 | 205 | 4678 | 191 | 616 |  |  |  |  |  |  |  |  |
| 94.60 | 0  | 0  | 25 | 0  | 323 | 51  | 169 | 134 | 4715 | 283 | 653 |  |  |  |  |  |  |  |  |
| 94.71 | 29 | 0  | 42 | 0  | 301 | 60  | 147 | 231 | 4592 | 94  | 637 |  |  |  |  |  |  |  |  |
| 94.80 | 0  | 0  | 24 | 0  | 297 | 76  | 243 | 206 | 4626 | 200 | 615 |  |  |  |  |  |  |  |  |
| 94.91 | 18 | 33 | 37 | 8  | 307 | 192 | 113 | 374 | 4704 | 165 | 583 |  |  |  |  |  |  |  |  |
| 95.00 | 20 | 0  | 21 | 0  | 299 | 86  | 221 | 194 | 4613 | 89  | 623 |  |  |  |  |  |  |  |  |
| 95.11 | 14 | 7  | 19 | 18 | 283 | 32  | 205 | 207 | 4445 | 55  | 622 |  |  |  |  |  |  |  |  |
| 95.20 | 30 | 18 | 14 | 0  | 328 | 100 | 148 | 260 | 4599 | 228 | 592 |  |  |  |  |  |  |  |  |
| 95.31 | 0  | 0  | 25 | 0  | 318 | 64  | 137 | 307 | 4586 | 66  | 629 |  |  |  |  |  |  |  |  |
| 95.40 | 0  | 0  | 14 | 0  | 391 | 70  | 201 | 237 | 4567 | 303 | 648 |  |  |  |  |  |  |  |  |
| 95.51 | 0  | 14 | 31 | 0  | 338 | 45  | 78  | 133 | 4862 | 129 | 698 |  |  |  |  |  |  |  |  |
| 95.60 | 0  | 0  | 21 | 0  | 323 | 86  | 157 | 256 | 4813 | 0   | 617 |  |  |  |  |  |  |  |  |
| 95.71 | 0  | 25 | 10 | 0  | 287 | 79  | 173 | 258 | 4825 | 166 | 578 |  |  |  |  |  |  |  |  |
| 95.81 | 18 | 19 | 27 | 0  | 301 | 104 | 115 | 212 | 4693 | 275 | 592 |  |  |  |  |  |  |  |  |
| 95.91 | 22 | 0  | 31 | 0  | 283 | 64  | 207 | 227 | 4748 | 134 | 644 |  |  |  |  |  |  |  |  |
| 96.01 | 0  | 0  | 41 | 0  | 339 | 66  | 205 | 249 | 4686 | 213 | 584 |  |  |  |  |  |  |  |  |
| 96.11 | 10 | 0  | 30 | 0  | 300 | 7   | 168 | 275 | 4525 | 265 | 591 |  |  |  |  |  |  |  |  |
| 96.21 | 8  | 27 | 43 | 0  | 302 | 98  | 32  | 179 | 4593 | 175 | 617 |  |  |  |  |  |  |  |  |
| 96.31 | 0  | 11 | 43 | 0  | 326 | 64  | 244 | 186 | 4662 | 284 | 696 |  |  |  |  |  |  |  |  |
| 96.41 | 19 | 0  | 53 | 0  | 280 | 125 | 150 | 153 | 4718 | 307 | 618 |  |  |  |  |  |  |  |  |
| 96.51 | 0  | 6  | 34 | 0  | 319 | 48  | 99  | 131 | 4650 | 67  | 676 |  |  |  |  |  |  |  |  |
| 96.61 | 33 | 8  | 52 | 0  | 395 | 121 | 189 | 262 | 4475 | 314 | 643 |  |  |  |  |  |  |  |  |
| 96.70 | 26 | 37 | 46 | 0  | 349 | 79  | 168 | 190 | 4409 | 113 | 629 |  |  |  |  |  |  |  |  |
| 96.81 | 9  | 0  | 28 | 0  | 341 | 74  | 209 | 145 | 4546 | 215 | 603 |  |  |  |  |  |  |  |  |
| 96.90 | 21 | 21 | 8  | 0  | 347 | 44  | 163 | 63  | 4553 | 46  | 585 |  |  |  |  |  |  |  |  |
| 97.01 | 11 | 0  | 36 | 0  | 305 | 99  | 163 | 236 | 4779 | 172 | 596 |  |  |  |  |  |  |  |  |
| 97.11 | 10 | 6  | 41 | 0  | 353 | 52  | 156 | 206 | 4649 | 254 | 615 |  |  |  |  |  |  |  |  |
| 97.21 | 5  | 0  | 0  | 0  | 368 | 73  | 125 | 281 | 4577 | 103 | 580 |  |  |  |  |  |  |  |  |
| 97.31 | 10 | 0  | 39 | 11 | 295 | 77  | 170 | 261 | 4431 | 318 | 602 |  |  |  |  |  |  |  |  |
| 97.41 | 0  | 0  | 10 | 0  | 369 | 78  | 129 | 139 | 4586 | 379 | 618 |  |  |  |  |  |  |  |  |
| 97.51 | 0  | 0  | 33 | 14 | 280 | 56  | 150 | 203 | 4500 | 220 | 642 |  |  |  |  |  |  |  |  |
| 97.61 | 0  | 12 | 29 | 0  | 305 | 30  | 63  | 197 | 4685 | 94  | 612 |  |  |  |  |  |  |  |  |

|               |                                                                                    |    |    |    |     |     |     |     |      |     |     |  |  |  |  |  |  |  |  |
|---------------|------------------------------------------------------------------------------------|----|----|----|-----|-----|-----|-----|------|-----|-----|--|--|--|--|--|--|--|--|
| 97.70         | 14                                                                                 | 0  | 31 | 0  | 304 | 36  | 110 | 156 | 4454 | 339 | 567 |  |  |  |  |  |  |  |  |
|               |                                                                                    |    |    |    |     |     |     |     |      |     |     |  |  |  |  |  |  |  |  |
|               | Scots pine #1. After alcohol extraction.                                           |    |    |    |     |     |     |     |      |     |     |  |  |  |  |  |  |  |  |
|               |                                                                                    |    |    |    |     |     |     |     |      |     |     |  |  |  |  |  |  |  |  |
|               | 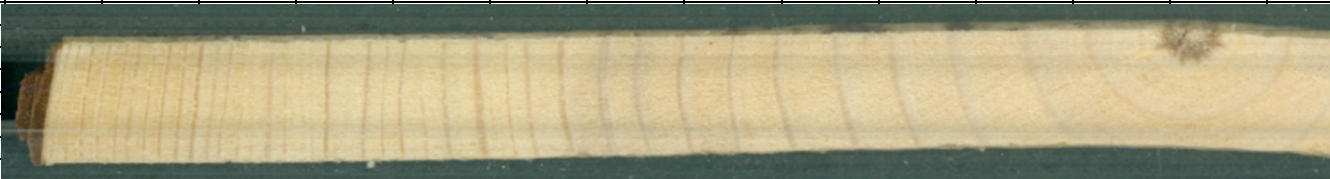 |    |    |    |     |     |     |     |      |     |     |  |  |  |  |  |  |  |  |
|               |                                                                                    |    |    |    |     |     |     |     |      |     |     |  |  |  |  |  |  |  |  |
|               |                                                                                    |    |    |    |     |     |     |     |      |     |     |  |  |  |  |  |  |  |  |
|               |                                                                                    |    |    |    |     |     |     |     |      |     |     |  |  |  |  |  |  |  |  |
|               |                                                                                    |    |    |    |     |     |     |     |      |     |     |  |  |  |  |  |  |  |  |
|               |                                                                                    |    |    |    |     |     |     |     |      |     |     |  |  |  |  |  |  |  |  |
|               |                                                                                    |    |    |    |     |     |     |     |      |     |     |  |  |  |  |  |  |  |  |
|               |                                                                                    |    |    |    |     |     |     |     |      |     |     |  |  |  |  |  |  |  |  |
| position (mm) | Al                                                                                 | P  | S  | Ti | Mn  | Fe  | Cu  | Zn  | Ca   | Sr  | K   |  |  |  |  |  |  |  |  |
| 93.81         | 38                                                                                 | 0  | 7  | 23 | 140 | 164 | 373 | 331 | 339  | 0   | 104 |  |  |  |  |  |  |  |  |
| 93.91         | 71                                                                                 | 26 | 0  | 34 | 101 | 67  | 320 | 338 | 343  | 0   | 94  |  |  |  |  |  |  |  |  |
| 94.01         | 46                                                                                 | 21 | 13 | 13 | 98  | 70  | 247 | 288 | 364  | 81  | 127 |  |  |  |  |  |  |  |  |
| 94.11         | 47                                                                                 | 5  | 13 | 0  | 125 | 86  | 336 | 157 | 329  | 182 | 127 |  |  |  |  |  |  |  |  |
| 94.21         | 61                                                                                 | 8  | 9  | 0  | 127 | 79  | 198 | 323 | 334  | 60  | 100 |  |  |  |  |  |  |  |  |
| 94.30         | 67                                                                                 | 22 | 12 | 0  | 210 | 109 | 297 | 259 | 317  | 20  | 109 |  |  |  |  |  |  |  |  |
| 94.40         | 53                                                                                 | 5  | 17 | 0  | 114 | 38  | 227 | 249 | 367  | 0   | 125 |  |  |  |  |  |  |  |  |
| 94.50         | 60                                                                                 | 15 | 0  | 15 | 77  | 74  | 340 | 374 | 302  | 0   | 113 |  |  |  |  |  |  |  |  |
| 94.61         | 62                                                                                 | 27 | 0  | 33 | 186 | 82  | 309 | 333 | 312  | 0   | 103 |  |  |  |  |  |  |  |  |
| 94.71         | 48                                                                                 | 20 | 6  | 40 | 174 | 67  | 436 | 285 | 321  | 0   | 115 |  |  |  |  |  |  |  |  |
| 94.80         | 72                                                                                 | 15 | 5  | 19 | 113 | 100 | 279 | 237 | 313  | 80  | 88  |  |  |  |  |  |  |  |  |
| 94.91         | 58                                                                                 | 22 | 8  | 0  | 131 | 128 | 310 | 157 | 333  | 166 | 92  |  |  |  |  |  |  |  |  |
| 95.00         | 62                                                                                 | 0  | 0  | 9  | 166 | 104 | 276 | 261 | 350  | 208 | 97  |  |  |  |  |  |  |  |  |
| 95.11         | 41                                                                                 | 0  | 17 | 41 | 138 | 100 | 229 | 279 | 364  | 209 | 70  |  |  |  |  |  |  |  |  |
| 95.20         | 45                                                                                 | 24 | 0  | 22 | 170 | 102 | 326 | 313 | 372  | 0   | 86  |  |  |  |  |  |  |  |  |
| 95.31         | 54                                                                                 | 36 | 5  | 32 | 49  | 45  | 279 | 400 | 335  | 0   | 113 |  |  |  |  |  |  |  |  |
| 95.40         | 62                                                                                 | 31 | 14 | 0  | 80  | 125 | 268 | 390 | 323  | 0   | 97  |  |  |  |  |  |  |  |  |
| 95.51         | 70                                                                                 | 20 | 13 | 21 | 103 | 13  | 454 | 308 | 345  | 0   | 143 |  |  |  |  |  |  |  |  |
| 95.61         | 63                                                                                 | 11 | 0  | 0  | 140 | 68  | 342 | 392 | 307  | 0   | 99  |  |  |  |  |  |  |  |  |
| 95.71         | 36                                                                                 | 7  | 0  | 29 | 96  | 41  | 416 | 440 | 318  | 90  | 86  |  |  |  |  |  |  |  |  |
| 95.81         | 59                                                                                 | 19 | 28 | 24 | 99  | 64  | 350 | 313 | 294  | 0   | 70  |  |  |  |  |  |  |  |  |
| 95.91         | 48                                                                                 | 0  | 0  | 0  | 121 | 123 | 231 | 225 | 321  | 138 | 53  |  |  |  |  |  |  |  |  |
| 96.01         | 46                                                                                 | 22 | 10 | 7  | 128 | 67  | 239 | 354 | 420  | 169 | 90  |  |  |  |  |  |  |  |  |
| 96.11         | 54                                                                                 | 19 | 9  | 19 | 129 | 56  | 256 | 253 | 429  | 340 | 81  |  |  |  |  |  |  |  |  |
| 96.21         | 62                                                                                 | 0  | 0  | 7  | 194 | 94  | 316 | 422 | 451  | 137 | 113 |  |  |  |  |  |  |  |  |
| 96.31         | 71                                                                                 | 32 | 8  | 26 | 104 | 88  | 355 | 285 | 481  | 200 | 120 |  |  |  |  |  |  |  |  |
| 96.41         | 46                                                                                 | 7  | 8  | 24 | 123 | 120 | 305 | 326 | 490  | 32  | 113 |  |  |  |  |  |  |  |  |
| 96.51         | 74                                                                                 | 30 | 19 | 0  | 133 | 84  | 306 | 330 | 397  | 42  | 109 |  |  |  |  |  |  |  |  |
| 96.60         | 47                                                                                 | 32 | 18 | 0  | 124 | 80  | 372 | 315 | 365  | 0   | 113 |  |  |  |  |  |  |  |  |
| 96.71         | 63                                                                                 | 15 | 0  | 28 | 161 | 78  | 328 | 277 | 345  | 0   | 72  |  |  |  |  |  |  |  |  |
| 96.80         | 52                                                                                 | 0  | 0  | 13 | 113 | 30  | 297 | 363 | 296  | 0   | 74  |  |  |  |  |  |  |  |  |
| 96.90         | 89                                                                                 | 30 | 8  | 24 | 96  | 89  | 326 | 123 | 368  | 149 | 81  |  |  |  |  |  |  |  |  |
| 97.00         | 44                                                                                 | 0  | 0  | 0  | 140 | 140 | 267 | 140 | 354  | 122 | 86  |  |  |  |  |  |  |  |  |
| 97.11         | 42                                                                                 | 0  | 0  | 21 | 154 | 103 | 242 | 155 | 391  | 198 | 67  |  |  |  |  |  |  |  |  |
| 97.21         | 33                                                                                 | 7  | 0  | 0  | 116 | 88  | 306 | 127 | 367  | 171 | 78  |  |  |  |  |  |  |  |  |
| 97.31         | 44                                                                                 | 0  | 0  | 4  | 142 | 106 | 258 | 243 | 415  | 75  | 79  |  |  |  |  |  |  |  |  |
| 97.41         | 92                                                                                 | 34 | 20 | 0  | 196 | 88  | 144 | 280 | 438  | 226 | 110 |  |  |  |  |  |  |  |  |
| 97.50         | 53                                                                                 | 16 | 11 | 8  | 167 | 92  | 383 | 378 | 399  | 0   | 90  |  |  |  |  |  |  |  |  |
| 97.60         | 50                                                                                 | 22 | 14 | 0  | 80  | 51  | 310 | 292 | 427  | 0   | 109 |  |  |  |  |  |  |  |  |
| 97.71         | 77                                                                                 | 23 | 13 | 0  | 173 | 37  | 301 | 362 | 411  | 0   | 111 |  |  |  |  |  |  |  |  |
| 97.81         | 34                                                                                 | 26 | 39 | 0  | 112 | 43  | 327 | 315 | 355  | 76  | 112 |  |  |  |  |  |  |  |  |
| 97.91         | 71                                                                                 | 24 | 5  | 23 | 140 | 69  | 296 | 264 | 355  | 0   | 92  |  |  |  |  |  |  |  |  |

|        |    |    |    |    |     |     |     |     |     |     |     |  |  |  |  |  |  |  |
|--------|----|----|----|----|-----|-----|-----|-----|-----|-----|-----|--|--|--|--|--|--|--|
| 98.01  | 46 | 8  | 31 | 0  | 130 | 61  | 230 | 234 | 331 | 277 | 61  |  |  |  |  |  |  |  |
| 98.11  | 57 | 14 | 10 | 0  | 168 | 133 | 293 | 360 | 390 | 42  | 70  |  |  |  |  |  |  |  |
| 98.21  | 55 | 10 | 6  | 51 | 138 | 112 | 206 | 186 | 403 | 17  | 107 |  |  |  |  |  |  |  |
| 98.30  | 43 | 34 | 15 | 7  | 157 | 26  | 215 | 369 | 416 | 104 | 90  |  |  |  |  |  |  |  |
| 98.41  | 21 | 34 | 13 | 33 | 198 | 86  | 265 | 306 | 401 | 0   | 88  |  |  |  |  |  |  |  |
| 98.51  | 42 | 18 | 25 | 0  | 106 | 77  | 253 | 295 | 410 | 0   | 104 |  |  |  |  |  |  |  |
| 98.61  | 72 | 12 | 8  | 38 | 183 | 97  | 449 | 409 | 354 | 91  | 85  |  |  |  |  |  |  |  |
| 98.70  | 63 | 25 | 8  | 0  | 145 | 67  | 224 | 391 | 338 | 0   | 73  |  |  |  |  |  |  |  |
| 98.81  | 60 | 5  | 0  | 26 | 99  | 125 | 318 | 280 | 312 | 0   | 68  |  |  |  |  |  |  |  |
| 98.91  | 72 | 10 | 0  | 22 | 169 | 113 | 336 | 280 | 400 | 148 | 75  |  |  |  |  |  |  |  |
| 99.00  | 44 | 33 | 5  | 11 | 165 | 160 | 159 | 216 | 427 | 89  | 97  |  |  |  |  |  |  |  |
| 99.11  | 89 | 13 | 0  | 46 | 157 | 107 | 234 | 272 | 464 | 246 | 111 |  |  |  |  |  |  |  |
| 99.21  | 69 | 6  | 0  | 23 | 154 | 121 | 154 | 232 | 523 | 70  | 74  |  |  |  |  |  |  |  |
| 99.31  | 48 | 0  | 12 | 0  | 181 | 88  | 329 | 215 | 409 | 59  | 79  |  |  |  |  |  |  |  |
| 99.40  | 68 | 0  | 23 | 10 | 212 | 0   | 246 | 289 | 465 | 0   | 111 |  |  |  |  |  |  |  |
| 99.51  | 67 | 23 | 0  | 17 | 145 | 49  | 344 | 506 | 462 | 25  | 114 |  |  |  |  |  |  |  |
| 99.61  | 45 | 10 | 5  | 19 | 153 | 57  | 317 | 409 | 418 | 0   | 111 |  |  |  |  |  |  |  |
| 99.70  | 59 | 26 | 5  | 8  | 133 | 97  | 346 | 90  | 448 | 0   | 98  |  |  |  |  |  |  |  |
| 99.80  | 73 | 0  | 0  | 16 | 139 | 85  | 217 | 230 | 378 | 0   | 61  |  |  |  |  |  |  |  |
| 99.90  | 74 | 16 | 0  | 14 | 148 | 133 | 257 | 238 | 404 | 271 | 85  |  |  |  |  |  |  |  |
| 100.00 | 57 | 9  | 0  | 6  | 136 | 147 | 175 | 274 | 433 | 235 | 42  |  |  |  |  |  |  |  |
| 100.11 | 58 | 0  | 0  | 20 | 164 | 78  | 259 | 176 | 445 | 159 | 74  |  |  |  |  |  |  |  |
| 100.21 | 40 | 32 | 0  | 12 | 166 | 113 | 252 | 278 | 407 | 163 | 102 |  |  |  |  |  |  |  |
| 100.31 | 53 | 25 | 0  | 0  | 153 | 100 | 363 | 420 | 453 | 0   | 98  |  |  |  |  |  |  |  |
| 100.41 | 71 | 24 | 12 | 0  | 138 | 35  | 252 | 355 | 457 | 73  | 99  |  |  |  |  |  |  |  |
| 100.51 | 47 | 40 | 11 | 0  | 207 | 15  | 374 | 398 | 428 | 0   | 97  |  |  |  |  |  |  |  |
| 100.61 | 69 | 34 | 17 | 11 | 109 | 0   | 358 | 450 | 385 | 0   | 56  |  |  |  |  |  |  |  |
| 100.71 | 44 | 8  | 13 | 13 | 130 | 0   | 285 | 377 | 325 | 0   | 76  |  |  |  |  |  |  |  |
| 100.81 | 57 | 38 | 9  | 13 | 160 | 104 | 152 | 314 | 406 | 0   | 58  |  |  |  |  |  |  |  |
| 100.91 | 59 | 0  | 0  | 35 | 87  | 150 | 246 | 244 | 393 | 69  | 79  |  |  |  |  |  |  |  |
| 101.01 | 36 | 0  | 0  | 22 | 108 | 182 | 274 | 243 | 416 | 163 | 69  |  |  |  |  |  |  |  |
| 101.11 | 49 | 0  | 0  | 15 | 199 | 191 | 203 | 225 | 397 | 336 | 87  |  |  |  |  |  |  |  |
| 101.20 | 58 | 0  | 0  | 0  | 138 | 151 | 238 | 221 | 454 | 291 | 84  |  |  |  |  |  |  |  |
| 101.31 | 40 | 19 | 5  | 21 | 152 | 118 | 265 | 186 | 443 | 240 | 95  |  |  |  |  |  |  |  |
| 101.41 | 63 | 23 | 13 | 0  | 154 | 39  | 209 | 246 | 474 | 22  | 88  |  |  |  |  |  |  |  |
| 101.51 | 37 | 23 | 0  | 24 | 195 | 90  | 306 | 349 | 437 | 0   | 113 |  |  |  |  |  |  |  |
| 101.61 | 55 | 17 | 19 | 31 | 161 | 53  | 407 | 492 | 424 | 0   | 82  |  |  |  |  |  |  |  |
| 101.71 | 46 | 14 | 10 | 0  | 135 | 72  | 409 | 455 | 383 | 0   | 71  |  |  |  |  |  |  |  |
| 101.80 | 79 | 25 | 4  | 0  | 170 | 42  | 193 | 362 | 396 | 0   | 86  |  |  |  |  |  |  |  |
| 101.90 | 63 | 0  | 0  | 28 | 128 | 90  | 375 | 277 | 340 | 0   | 63  |  |  |  |  |  |  |  |
| 102.00 | 58 | 17 | 0  | 0  | 106 | 109 | 203 | 197 | 343 | 108 | 76  |  |  |  |  |  |  |  |
| 102.11 | 40 | 0  | 6  | 0  | 145 | 139 | 236 | 286 | 402 | 269 | 95  |  |  |  |  |  |  |  |
| 102.20 | 58 | 0  | 0  | 13 | 156 | 74  | 297 | 100 | 431 | 171 | 62  |  |  |  |  |  |  |  |
| 102.31 | 35 | 0  | 5  | 8  | 175 | 126 | 213 | 278 | 503 | 68  | 115 |  |  |  |  |  |  |  |
| 102.41 | 40 | 14 | 12 | 0  | 127 | 72  | 320 | 381 | 501 | 16  | 78  |  |  |  |  |  |  |  |
| 102.51 | 63 | 19 | 16 | 24 | 247 | 77  | 429 | 323 | 509 | 0   | 123 |  |  |  |  |  |  |  |
| 102.60 | 82 | 28 | 14 | 6  | 113 | 31  | 279 | 408 | 429 | 0   | 94  |  |  |  |  |  |  |  |
| 102.71 | 49 | 32 | 6  | 35 | 189 | 72  | 301 | 388 | 429 | 0   | 93  |  |  |  |  |  |  |  |
| 102.81 | 70 | 10 | 0  | 19 | 214 | 38  | 341 | 441 | 381 | 0   | 75  |  |  |  |  |  |  |  |
| 102.90 | 44 | 9  | 5  | 0  | 151 | 91  | 214 | 298 | 378 | 0   | 82  |  |  |  |  |  |  |  |
| 103.00 | 56 | 30 | 0  | 0  | 168 | 148 | 192 | 98  | 417 | 249 | 92  |  |  |  |  |  |  |  |
| 103.10 | 61 | 14 | 16 | 12 | 163 | 197 | 262 | 150 | 427 | 187 | 80  |  |  |  |  |  |  |  |
| 103.20 | 69 | 16 | 11 | 12 | 174 | 120 | 196 | 182 | 449 | 0   | 108 |  |  |  |  |  |  |  |
| 103.30 | 50 | 0  | 0  | 0  | 217 | 63  | 289 | 219 | 509 | 68  | 104 |  |  |  |  |  |  |  |
| 103.41 | 63 | 0  | 19 | 26 | 215 | 67  | 241 | 334 | 535 | 131 | 88  |  |  |  |  |  |  |  |
| 103.51 | 50 | 14 | 18 | 10 | 187 | 24  | 408 | 378 | 505 | 0   | 96  |  |  |  |  |  |  |  |
| 103.61 | 79 | 0  | 0  | 0  | 71  | 90  | 356 | 395 | 428 | 0   | 83  |  |  |  |  |  |  |  |
| 103.71 | 51 | 25 | 27 | 25 | 186 | 88  | 439 | 475 | 439 | 0   | 92  |  |  |  |  |  |  |  |

|        |    |    |    |    |     |     |     |     |     |     |     |  |  |  |  |  |  |  |
|--------|----|----|----|----|-----|-----|-----|-----|-----|-----|-----|--|--|--|--|--|--|--|
| 103.81 | 75 | 5  | 8  | 0  | 161 | 56  | 329 | 333 | 381 | 0   | 68  |  |  |  |  |  |  |  |
| 103.91 | 27 | 21 | 0  | 0  | 152 | 52  | 285 | 280 | 341 | 0   | 82  |  |  |  |  |  |  |  |
| 104.01 | 33 | 9  | 0  | 40 | 136 | 46  | 250 | 278 | 442 | 75  | 72  |  |  |  |  |  |  |  |
| 104.10 | 45 | 14 | 7  | 13 | 98  | 118 | 250 | 176 | 437 | 198 | 99  |  |  |  |  |  |  |  |
| 104.21 | 61 | 0  | 19 | 0  | 174 | 147 | 220 | 183 | 513 | 291 | 85  |  |  |  |  |  |  |  |
| 104.31 | 44 | 0  | 14 | 61 | 181 | 62  | 234 | 222 | 469 | 167 | 90  |  |  |  |  |  |  |  |
| 104.40 | 66 | 33 | 0  | 17 | 180 | 49  | 199 | 306 | 488 | 33  | 123 |  |  |  |  |  |  |  |
| 104.51 | 72 | 0  | 0  | 0  | 152 | 0   | 415 | 503 | 431 | 47  | 91  |  |  |  |  |  |  |  |
| 104.61 | 43 | 15 | 13 | 14 | 173 | 72  | 307 | 287 | 324 | 49  | 81  |  |  |  |  |  |  |  |
| 104.70 | 62 | 13 | 31 | 19 | 96  | 126 | 260 | 308 | 392 | 0   | 49  |  |  |  |  |  |  |  |
| 104.80 | 55 | 12 | 5  | 0  | 202 | 107 | 265 | 233 | 358 | 141 | 61  |  |  |  |  |  |  |  |
| 104.90 | 42 | 11 | 7  | 0  | 199 | 210 | 116 | 204 | 368 | 358 | 85  |  |  |  |  |  |  |  |
| 105.00 | 51 | 0  | 0  | 8  | 168 | 293 | 191 | 171 | 515 | 262 | 58  |  |  |  |  |  |  |  |
| 105.10 | 32 | 10 | 0  | 26 | 159 | 177 | 131 | 112 | 454 | 365 | 59  |  |  |  |  |  |  |  |
| 105.21 | 49 | 0  | 0  | 30 | 185 | 157 | 229 | 112 | 503 | 380 | 60  |  |  |  |  |  |  |  |
| 105.31 | 35 | 0  | 16 | 0  | 185 | 139 | 178 | 154 | 543 | 55  | 86  |  |  |  |  |  |  |  |
| 105.41 | 55 | 10 | 6  | 0  | 136 | 146 | 248 | 328 | 526 | 46  | 98  |  |  |  |  |  |  |  |
| 105.51 | 47 | 7  | 0  | 22 | 156 | 92  | 293 | 378 | 531 | 52  | 91  |  |  |  |  |  |  |  |
| 105.60 | 62 | 4  | 0  | 8  | 144 | 8   | 389 | 378 | 472 | 0   | 82  |  |  |  |  |  |  |  |
| 105.70 | 77 | 22 | 0  | 26 | 159 | 89  | 339 | 272 | 514 | 0   | 87  |  |  |  |  |  |  |  |
| 105.81 | 52 | 19 | 0  | 0  | 120 | 222 | 179 | 278 | 492 | 285 | 117 |  |  |  |  |  |  |  |
| 105.90 | 42 | 0  | 18 | 20 | 181 | 171 | 191 | 148 | 487 | 155 | 72  |  |  |  |  |  |  |  |
| 106.01 | 44 | 16 | 0  | 43 | 202 | 91  | 176 | 242 | 559 | 153 | 108 |  |  |  |  |  |  |  |
| 106.10 | 68 | 12 | 18 | 0  | 200 | 62  | 263 | 189 | 566 | 117 | 73  |  |  |  |  |  |  |  |
| 106.20 | 60 | 34 | 20 | 18 | 237 | 77  | 244 | 267 | 551 | 0   | 122 |  |  |  |  |  |  |  |
| 106.30 | 52 | 17 | 5  | 0  | 212 | 71  | 288 | 461 | 509 | 0   | 87  |  |  |  |  |  |  |  |
| 106.41 | 54 | 14 | 19 | 26 | 231 | 92  | 240 | 394 | 424 | 0   | 70  |  |  |  |  |  |  |  |
| 106.51 | 77 | 26 | 8  | 18 | 176 | 165 | 204 | 271 | 455 | 172 | 82  |  |  |  |  |  |  |  |
| 106.61 | 17 | 4  | 28 | 0  | 175 | 210 | 202 | 169 | 523 | 90  | 77  |  |  |  |  |  |  |  |
| 106.71 | 46 | 0  | 0  | 0  | 222 | 203 | 261 | 284 | 525 | 374 | 93  |  |  |  |  |  |  |  |
| 106.81 | 44 | 0  | 18 | 28 | 155 | 121 | 213 | 170 | 569 | 176 | 104 |  |  |  |  |  |  |  |
| 106.91 | 44 | 8  | 0  | 0  | 244 | 155 | 238 | 204 | 542 | 164 | 125 |  |  |  |  |  |  |  |
| 107.01 | 64 | 5  | 4  | 10 | 187 | 100 | 307 | 259 | 550 | 128 | 122 |  |  |  |  |  |  |  |
| 107.11 | 60 | 17 | 0  | 48 | 120 | 20  | 334 | 344 | 494 | 0   | 124 |  |  |  |  |  |  |  |
| 107.21 | 47 | 17 | 10 | 0  | 183 | 36  | 349 | 459 | 328 | 0   | 51  |  |  |  |  |  |  |  |
| 107.31 | 52 | 20 | 12 | 0  | 141 | 35  | 358 | 392 | 290 | 0   | 90  |  |  |  |  |  |  |  |
| 107.40 | 63 | 41 | 6  | 9  | 150 | 0   | 289 | 315 | 329 | 0   | 44  |  |  |  |  |  |  |  |
| 107.51 | 44 | 17 | 0  | 0  | 150 | 63  | 252 | 366 | 325 | 200 | 73  |  |  |  |  |  |  |  |
| 107.61 | 57 | 8  | 4  | 34 | 135 | 117 | 308 | 235 | 426 | 227 | 86  |  |  |  |  |  |  |  |
| 107.71 | 65 | 19 | 17 | 18 | 164 | 165 | 63  | 192 | 421 | 76  | 95  |  |  |  |  |  |  |  |
| 107.81 | 41 | 0  | 0  | 38 | 160 | 125 | 285 | 145 | 480 | 101 | 74  |  |  |  |  |  |  |  |
| 107.91 | 38 | 6  | 0  | 0  | 173 | 105 | 220 | 0   | 483 | 80  | 82  |  |  |  |  |  |  |  |
| 108.00 | 69 | 0  | 0  | 8  | 138 | 170 | 414 | 211 | 502 | 218 | 101 |  |  |  |  |  |  |  |
| 108.10 | 46 | 9  | 0  | 45 | 160 | 155 | 263 | 245 | 542 | 254 | 127 |  |  |  |  |  |  |  |
| 108.21 | 52 | 11 | 0  | 0  | 133 | 22  | 336 | 404 | 484 | 0   | 65  |  |  |  |  |  |  |  |
| 108.31 | 49 | 15 | 17 | 17 | 138 | 56  | 353 | 445 | 432 | 0   | 70  |  |  |  |  |  |  |  |
| 108.41 | 35 | 26 | 0  | 46 | 154 | 36  | 304 | 224 | 388 | 0   | 69  |  |  |  |  |  |  |  |
| 108.51 | 38 | 0  | 0  | 0  | 151 | 80  | 215 | 165 | 413 | 247 | 87  |  |  |  |  |  |  |  |
| 108.61 | 63 | 6  | 10 | 28 | 204 | 90  | 196 | 294 | 460 | 230 | 91  |  |  |  |  |  |  |  |
| 108.70 | 57 | 0  | 0  | 20 | 199 | 112 | 223 | 250 | 563 | 121 | 118 |  |  |  |  |  |  |  |
| 108.81 | 65 | 0  | 27 | 0  | 267 | 111 | 321 | 344 | 599 | 0   | 91  |  |  |  |  |  |  |  |
| 108.91 | 48 | 6  | 7  | 11 | 182 | 39  | 221 | 397 | 420 | 0   | 76  |  |  |  |  |  |  |  |
| 109.01 | 38 | 12 | 23 | 13 | 160 | 91  | 196 | 271 | 469 | 165 | 32  |  |  |  |  |  |  |  |
| 109.11 | 68 | 0  | 0  | 0  | 198 | 194 | 200 | 160 | 470 | 144 | 71  |  |  |  |  |  |  |  |
| 109.20 | 59 | 0  | 5  | 27 | 223 | 123 | 173 | 239 | 551 | 324 | 81  |  |  |  |  |  |  |  |
| 109.30 | 41 | 5  | 0  | 33 | 203 | 192 | 218 | 283 | 504 | 97  | 81  |  |  |  |  |  |  |  |
| 109.40 | 63 | 14 | 0  | 0  | 186 | 107 | 252 | 131 | 606 | 217 | 115 |  |  |  |  |  |  |  |
| 109.51 | 62 | 31 | 22 | 23 | 181 | 83  | 201 | 310 | 624 | 28  | 102 |  |  |  |  |  |  |  |

|        |    |    |    |    |     |     |     |     |     |     |     |  |  |  |  |  |  |  |
|--------|----|----|----|----|-----|-----|-----|-----|-----|-----|-----|--|--|--|--|--|--|--|
| 109.60 | 47 | 21 | 36 | 23 | 225 | 87  | 415 | 265 | 503 | 0   | 91  |  |  |  |  |  |  |  |
| 109.70 | 30 | 0  | 11 | 19 | 221 | 124 | 361 | 288 | 479 | 92  | 62  |  |  |  |  |  |  |  |
| 109.80 | 67 | 0  | 18 | 0  | 212 | 105 | 330 | 265 | 613 | 0   | 114 |  |  |  |  |  |  |  |
| 109.91 | 31 | 15 | 12 | 0  | 200 | 21  | 362 | 337 | 571 | 0   | 102 |  |  |  |  |  |  |  |
| 110.01 | 52 | 30 | 9  | 64 | 186 | 68  | 184 | 239 | 426 | 0   | 116 |  |  |  |  |  |  |  |
| 110.11 | 70 | 5  | 0  | 24 | 162 | 113 | 292 | 343 | 437 | 0   | 80  |  |  |  |  |  |  |  |
| 110.21 | 65 | 0  | 0  | 0  | 196 | 114 | 206 | 300 | 467 | 113 | 89  |  |  |  |  |  |  |  |
| 110.31 | 94 | 8  | 25 | 16 | 173 | 123 | 207 | 336 | 511 | 100 | 85  |  |  |  |  |  |  |  |
| 110.41 | 39 | 5  | 0  | 10 | 157 | 146 | 271 | 274 | 525 | 361 | 93  |  |  |  |  |  |  |  |
| 110.50 | 71 | 0  | 0  | 0  | 228 | 138 | 249 | 296 | 505 | 153 | 82  |  |  |  |  |  |  |  |
| 110.60 | 67 | 13 | 0  | 28 | 189 | 83  | 253 | 231 | 547 | 163 | 89  |  |  |  |  |  |  |  |
| 110.71 | 74 | 9  | 0  | 23 | 211 | 154 | 300 | 282 | 657 | 358 | 107 |  |  |  |  |  |  |  |
| 110.80 | 79 | 21 | 23 | 16 | 228 | 42  | 348 | 466 | 638 | 0   | 139 |  |  |  |  |  |  |  |
| 110.90 | 44 | 8  | 18 | 0  | 188 | 0   | 348 | 464 | 496 | 0   | 77  |  |  |  |  |  |  |  |
| 111.00 | 45 | 30 | 0  | 0  | 150 | 9   | 382 | 365 | 402 | 0   | 66  |  |  |  |  |  |  |  |
| 111.10 | 53 | 28 | 0  | 16 | 139 | 57  | 290 | 366 | 389 | 90  | 62  |  |  |  |  |  |  |  |
| 111.21 | 67 | 17 | 14 | 12 | 175 | 46  | 173 | 145 | 451 | 45  | 82  |  |  |  |  |  |  |  |
| 111.31 | 55 | 0  | 15 | 0  | 142 | 59  | 228 | 332 | 434 | 133 | 70  |  |  |  |  |  |  |  |
| 111.41 | 46 | 20 | 20 | 23 | 196 | 122 | 247 | 172 | 436 | 251 | 71  |  |  |  |  |  |  |  |
| 111.51 | 47 | 14 | 0  | 17 | 159 | 72  | 249 | 199 | 501 | 344 | 82  |  |  |  |  |  |  |  |
| 111.61 | 51 | 0  | 0  | 0  | 221 | 73  | 269 | 247 | 468 | 257 | 91  |  |  |  |  |  |  |  |
| 111.71 | 62 | 23 | 18 | 25 | 155 | 151 | 210 | 208 | 491 | 100 | 88  |  |  |  |  |  |  |  |
| 111.81 | 34 | 7  | 6  | 56 | 214 | 146 | 127 | 210 | 528 | 121 | 101 |  |  |  |  |  |  |  |
| 111.90 | 10 | 0  | 0  | 0  | 220 | 161 | 284 | 363 | 527 | 151 | 112 |  |  |  |  |  |  |  |
| 112.00 | 70 | 35 | 18 | 27 | 192 | 107 | 329 | 241 | 594 | 289 | 102 |  |  |  |  |  |  |  |
| 112.11 | 70 | 17 | 21 | 0  | 239 | 39  | 262 | 338 | 671 | 0   | 149 |  |  |  |  |  |  |  |
| 112.21 | 78 | 40 | 31 | 43 | 192 | 45  | 347 | 395 | 600 | 0   | 125 |  |  |  |  |  |  |  |
| 112.31 | 57 | 17 | 5  | 0  | 222 | 86  | 285 | 347 | 436 | 31  | 108 |  |  |  |  |  |  |  |
| 112.41 | 50 | 0  | 0  | 13 | 210 | 74  | 220 | 244 | 473 | 9   | 81  |  |  |  |  |  |  |  |
| 112.50 | 58 | 34 | 0  | 0  | 171 | 165 | 160 | 229 | 463 | 369 | 59  |  |  |  |  |  |  |  |
| 112.61 | 61 | 19 | 0  | 54 | 194 | 100 | 290 | 88  | 485 | 151 | 96  |  |  |  |  |  |  |  |
| 112.71 | 59 | 0  | 0  | 67 | 182 | 110 | 314 | 219 | 538 | 96  | 102 |  |  |  |  |  |  |  |
| 112.81 | 72 | 0  | 11 | 0  | 172 | 218 | 247 | 213 | 508 | 285 | 97  |  |  |  |  |  |  |  |
| 112.91 | 66 | 0  | 0  | 0  | 162 | 129 | 259 | 220 | 581 | 164 | 111 |  |  |  |  |  |  |  |
| 113.01 | 65 | 0  | 0  | 22 | 212 | 85  | 219 | 207 | 568 | 227 | 105 |  |  |  |  |  |  |  |
| 113.11 | 35 | 5  | 14 | 0  | 189 | 137 | 329 | 178 | 613 | 33  | 98  |  |  |  |  |  |  |  |
| 113.20 | 50 | 23 | 20 | 71 | 216 | 140 | 386 | 421 | 675 | 0   | 115 |  |  |  |  |  |  |  |
| 113.30 | 65 | 45 | 14 | 6  | 174 | 0   | 289 | 525 | 576 | 0   | 93  |  |  |  |  |  |  |  |
| 113.41 | 36 | 25 | 30 | 0  | 229 | 96  | 303 | 525 | 501 | 0   | 70  |  |  |  |  |  |  |  |
| 113.51 | 58 | 23 | 34 | 0  | 149 | 6   | 277 | 351 | 479 | 0   | 82  |  |  |  |  |  |  |  |
| 113.61 | 35 | 17 | 0  | 40 | 167 | 38  | 280 | 341 | 439 | 47  | 83  |  |  |  |  |  |  |  |
| 113.71 | 54 | 0  | 8  | 0  | 207 | 86  | 224 | 286 | 513 | 144 | 69  |  |  |  |  |  |  |  |
| 113.81 | 55 | 12 | 0  | 14 | 218 | 74  | 264 | 197 | 503 | 211 | 95  |  |  |  |  |  |  |  |
| 113.91 | 25 | 12 | 13 | 24 | 184 | 145 | 228 | 214 | 549 | 298 | 82  |  |  |  |  |  |  |  |
| 114.01 | 50 | 0  | 0  | 16 | 195 | 117 | 76  | 187 | 568 | 234 | 75  |  |  |  |  |  |  |  |
| 114.11 | 58 | 35 | 0  | 28 | 198 | 71  | 312 | 212 | 587 | 115 | 66  |  |  |  |  |  |  |  |
| 114.20 | 41 | 9  | 0  | 0  | 221 | 149 | 292 | 199 | 567 | 258 | 91  |  |  |  |  |  |  |  |
| 114.31 | 45 | 17 | 0  | 0  | 217 | 87  | 155 | 301 | 455 | 144 | 111 |  |  |  |  |  |  |  |
| 114.40 | 65 | 24 | 15 | 0  | 205 | 70  | 303 | 298 | 599 | 0   | 101 |  |  |  |  |  |  |  |
| 114.51 | 32 | 0  | 8  | 28 | 230 | 80  | 383 | 410 | 485 | 0   | 56  |  |  |  |  |  |  |  |
| 114.61 | 58 | 5  | 8  | 0  | 187 | 0   | 316 | 261 | 427 | 87  | 89  |  |  |  |  |  |  |  |
| 114.71 | 70 | 0  | 18 | 6  | 224 | 157 | 188 | 436 | 467 | 0   | 87  |  |  |  |  |  |  |  |
| 114.81 | 26 | 0  | 0  | 16 | 228 | 365 | 180 | 292 | 461 | 28  | 58  |  |  |  |  |  |  |  |
| 114.91 | 40 | 0  | 0  | 0  | 181 | 163 | 214 | 238 | 472 | 221 | 99  |  |  |  |  |  |  |  |
| 115.00 | 38 | 0  | 0  | 23 | 175 | 92  | 198 | 139 | 515 | 29  | 116 |  |  |  |  |  |  |  |
| 115.11 | 61 | 13 | 6  | 33 | 172 | 165 | 127 | 227 | 587 | 298 | 93  |  |  |  |  |  |  |  |
| 115.21 | 54 | 49 | 16 | 30 | 229 | 138 | 153 | 196 | 577 | 155 | 122 |  |  |  |  |  |  |  |
| 115.31 | 28 | 0  | 0  | 5  | 230 | 64  | 217 | 214 | 614 | 220 | 94  |  |  |  |  |  |  |  |

|        |    |    |    |    |     |     |     |     |     |     |     |  |  |  |  |  |  |  |  |
|--------|----|----|----|----|-----|-----|-----|-----|-----|-----|-----|--|--|--|--|--|--|--|--|
| 115.40 | 65 | 21 | 0  | 22 | 242 | 51  | 345 | 324 | 682 | 0   | 113 |  |  |  |  |  |  |  |  |
| 115.50 | 65 | 33 | 26 | 0  | 228 | 63  | 381 | 442 | 648 | 46  | 142 |  |  |  |  |  |  |  |  |
| 115.60 | 52 | 27 | 14 | 0  | 247 | 76  | 292 | 430 | 464 | 0   | 126 |  |  |  |  |  |  |  |  |
| 115.70 | 51 | 27 | 13 | 0  | 171 | 56  | 304 | 459 | 381 | 0   | 84  |  |  |  |  |  |  |  |  |
| 115.80 | 50 | 18 | 8  | 0  | 129 | 35  | 159 | 366 | 400 | 0   | 86  |  |  |  |  |  |  |  |  |
| 115.90 | 73 | 23 | 5  | 31 | 187 | 137 | 194 | 165 | 377 | 36  | 92  |  |  |  |  |  |  |  |  |
| 116.01 | 50 | 0  | 0  | 31 | 185 | 54  | 158 | 238 | 461 | 108 | 128 |  |  |  |  |  |  |  |  |
| 116.10 | 42 | 0  | 0  | 0  | 175 | 153 | 175 | 220 | 448 | 65  | 98  |  |  |  |  |  |  |  |  |
| 116.21 | 58 | 4  | 23 | 0  | 150 | 122 | 236 | 152 | 437 | 244 | 77  |  |  |  |  |  |  |  |  |
| 116.31 | 27 | 0  | 0  | 15 | 123 | 120 | 199 | 189 | 505 | 250 | 75  |  |  |  |  |  |  |  |  |
| 116.41 | 65 | 19 | 0  | 15 | 224 | 102 | 128 | 133 | 488 | 299 | 99  |  |  |  |  |  |  |  |  |
| 116.50 | 37 | 0  | 15 | 6  | 186 | 135 | 268 | 260 | 466 | 162 | 73  |  |  |  |  |  |  |  |  |
| 116.60 | 42 | 12 | 0  | 0  | 168 | 98  | 178 | 214 | 487 | 80  | 89  |  |  |  |  |  |  |  |  |
| 116.70 | 67 | 0  | 0  | 19 | 136 | 93  | 213 | 249 | 582 | 308 | 112 |  |  |  |  |  |  |  |  |
| 116.80 | 42 | 7  | 0  | 20 | 188 | 42  | 241 | 361 | 622 | 0   | 113 |  |  |  |  |  |  |  |  |
| 116.90 | 58 | 19 | 0  | 27 | 153 | 25  | 521 | 456 | 537 | 0   | 82  |  |  |  |  |  |  |  |  |
| 117.01 | 47 | 6  | 0  | 0  | 164 | 34  | 459 | 492 | 434 | 0   | 80  |  |  |  |  |  |  |  |  |
| 117.11 | 80 | 35 | 31 | 25 | 188 | 75  | 276 | 402 | 428 | 0   | 100 |  |  |  |  |  |  |  |  |
| 117.21 | 69 | 19 | 0  | 0  | 132 | 121 | 364 | 322 | 445 | 214 | 79  |  |  |  |  |  |  |  |  |
| 117.31 | 54 | 18 | 0  | 0  | 173 | 134 | 261 | 230 | 532 | 113 | 105 |  |  |  |  |  |  |  |  |
| 117.41 | 53 | 11 | 0  | 36 | 228 | 64  | 184 | 163 | 540 | 117 | 75  |  |  |  |  |  |  |  |  |
| 117.51 | 31 | 0  | 0  | 0  | 180 | 109 | 134 | 267 | 543 | 171 | 78  |  |  |  |  |  |  |  |  |
| 117.61 | 54 | 0  | 21 | 0  | 219 | 95  | 278 | 293 | 586 | 191 | 86  |  |  |  |  |  |  |  |  |
| 117.70 | 65 | 0  | 0  | 8  | 213 | 151 | 149 | 239 | 493 | 153 | 107 |  |  |  |  |  |  |  |  |
| 117.81 | 27 | 9  | 0  | 15 | 194 | 64  | 225 | 236 | 550 | 48  | 102 |  |  |  |  |  |  |  |  |
| 117.91 | 69 | 0  | 8  | 11 | 220 | 112 | 225 | 257 | 582 | 258 | 79  |  |  |  |  |  |  |  |  |
| 118.01 | 34 | 0  | 0  | 40 | 247 | 80  | 198 | 251 | 598 | 210 | 129 |  |  |  |  |  |  |  |  |
| 118.10 | 22 | 7  | 7  | 12 | 221 | 38  | 307 | 393 | 614 | 41  | 109 |  |  |  |  |  |  |  |  |
| 118.20 | 68 | 21 | 37 | 0  | 203 | 47  | 403 | 442 | 555 | 21  | 133 |  |  |  |  |  |  |  |  |
| 118.30 | 68 | 22 | 0  | 0  | 169 | 11  | 286 | 437 | 473 | 0   | 135 |  |  |  |  |  |  |  |  |
| 118.40 | 66 | 24 | 5  | 34 | 176 | 77  | 284 | 342 | 386 | 0   | 100 |  |  |  |  |  |  |  |  |
| 118.51 | 61 | 23 | 0  | 0  | 114 | 45  | 330 | 305 | 401 | 0   | 79  |  |  |  |  |  |  |  |  |
| 118.61 | 38 | 12 | 0  | 8  | 114 | 53  | 211 | 360 | 352 | 0   | 76  |  |  |  |  |  |  |  |  |
| 118.71 | 46 | 14 | 0  | 10 | 186 | 38  | 134 | 251 | 337 | 0   | 87  |  |  |  |  |  |  |  |  |
| 118.81 | 43 | 19 | 0  | 26 | 137 | 159 | 201 | 155 | 425 | 100 | 88  |  |  |  |  |  |  |  |  |
| 118.91 | 55 | 25 | 0  | 10 | 175 | 112 | 324 | 172 | 478 | 5   | 72  |  |  |  |  |  |  |  |  |
| 119.00 | 38 | 0  | 0  | 16 | 210 | 154 | 216 | 179 | 465 | 151 | 94  |  |  |  |  |  |  |  |  |
| 119.11 | 42 | 13 | 8  | 0  | 187 | 95  | 317 | 124 | 492 | 283 | 100 |  |  |  |  |  |  |  |  |
| 119.21 | 52 | 0  | 18 | 17 | 134 | 71  | 153 | 235 | 490 | 106 | 87  |  |  |  |  |  |  |  |  |
| 119.30 | 60 | 0  | 0  | 0  | 151 | 81  | 248 | 238 | 510 | 192 | 102 |  |  |  |  |  |  |  |  |
| 119.41 | 35 | 0  | 0  | 0  | 143 | 100 | 328 | 95  | 491 | 197 | 64  |  |  |  |  |  |  |  |  |
| 119.50 | 64 | 0  | 12 | 0  | 213 | 107 | 191 | 249 | 566 | 170 | 123 |  |  |  |  |  |  |  |  |
| 119.61 | 53 | 19 | 4  | 22 | 190 | 109 | 122 | 248 | 605 | 116 | 93  |  |  |  |  |  |  |  |  |
| 119.71 | 71 | 0  | 14 | 0  | 197 | 78  | 289 | 239 | 545 | 125 | 74  |  |  |  |  |  |  |  |  |
| 119.81 | 16 | 9  | 0  | 10 | 179 | 122 | 275 | 181 | 593 | 331 | 100 |  |  |  |  |  |  |  |  |
| 119.91 | 39 | 0  | 0  | 0  | 187 | 155 | 213 | 210 | 561 | 234 | 80  |  |  |  |  |  |  |  |  |
| 120.01 | 26 | 7  | 0  | 43 | 249 | 125 | 229 | 85  | 605 | 408 | 104 |  |  |  |  |  |  |  |  |
| 120.11 | 43 | 7  | 0  | 0  | 263 | 69  | 227 | 224 | 627 | 116 | 118 |  |  |  |  |  |  |  |  |
| 120.20 | 65 | 32 | 24 | 20 | 181 | 99  | 253 | 330 | 544 | 26  | 93  |  |  |  |  |  |  |  |  |
| 120.30 | 87 | 10 | 7  | 0  | 168 | 61  | 372 | 588 | 487 | 0   | 114 |  |  |  |  |  |  |  |  |
| 120.40 | 54 | 25 | 0  | 0  | 152 | 23  | 305 | 467 | 315 | 0   | 128 |  |  |  |  |  |  |  |  |
| 120.50 | 72 | 46 | 15 | 0  | 114 | 0   | 337 | 474 | 351 | 0   | 75  |  |  |  |  |  |  |  |  |
| 120.61 | 47 | 17 | 14 | 13 | 124 | 23  | 372 | 387 | 332 | 0   | 54  |  |  |  |  |  |  |  |  |
| 120.71 | 53 | 13 | 0  | 0  | 146 | 41  | 395 | 389 | 316 | 0   | 96  |  |  |  |  |  |  |  |  |
| 120.81 | 82 | 38 | 15 | 16 | 150 | 4   | 220 | 295 | 395 | 0   | 105 |  |  |  |  |  |  |  |  |
| 120.91 | 58 | 28 | 8  | 0  | 149 | 77  | 309 | 412 | 472 | 58  | 102 |  |  |  |  |  |  |  |  |
| 121.01 | 81 | 17 | 0  | 0  | 187 | 130 | 119 | 255 | 416 | 150 | 64  |  |  |  |  |  |  |  |  |
| 121.11 | 78 | 0  | 0  | 0  | 180 | 137 | 261 | 302 | 481 | 74  | 43  |  |  |  |  |  |  |  |  |

|        |    |    |    |    |     |     |     |     |     |     |     |  |  |  |  |  |  |  |
|--------|----|----|----|----|-----|-----|-----|-----|-----|-----|-----|--|--|--|--|--|--|--|
| 121.20 | 58 | 7  | 10 | 13 | 203 | 85  | 171 | 150 | 470 | 53  | 77  |  |  |  |  |  |  |  |
| 121.31 | 32 | 0  | 0  | 0  | 151 | 134 | 128 | 261 | 481 | 133 | 98  |  |  |  |  |  |  |  |
| 121.40 | 48 | 0  | 0  | 15 | 147 | 116 | 186 | 307 | 523 | 191 | 78  |  |  |  |  |  |  |  |
| 121.50 | 71 | 0  | 13 | 0  | 220 | 51  | 238 | 186 | 544 | 74  | 75  |  |  |  |  |  |  |  |
| 121.61 | 37 | 16 | 0  | 48 | 202 | 79  | 393 | 198 | 566 | 332 | 112 |  |  |  |  |  |  |  |
| 121.70 | 61 | 10 | 0  | 18 | 181 | 108 | 189 | 301 | 604 | 327 | 117 |  |  |  |  |  |  |  |
| 121.81 | 44 | 0  | 0  | 0  | 207 | 103 | 332 | 258 | 554 | 270 | 111 |  |  |  |  |  |  |  |
| 121.91 | 43 | 5  | 4  | 0  | 177 | 115 | 264 | 266 | 532 | 184 | 112 |  |  |  |  |  |  |  |
| 122.01 | 56 | 8  | 0  | 0  | 134 | 59  | 186 | 283 | 563 | 104 | 89  |  |  |  |  |  |  |  |
| 122.11 | 67 | 0  | 0  | 22 | 219 | 94  | 317 | 191 | 561 | 222 | 84  |  |  |  |  |  |  |  |
| 122.21 | 61 | 13 | 0  | 16 | 181 | 84  | 257 | 266 | 618 | 208 | 125 |  |  |  |  |  |  |  |
| 122.30 | 61 | 13 | 12 | 23 | 248 | 91  | 316 | 367 | 657 | 0   | 151 |  |  |  |  |  |  |  |
| 122.40 | 58 | 23 | 0  | 0  | 256 | 29  | 331 | 617 | 578 | 0   | 127 |  |  |  |  |  |  |  |
| 122.50 | 67 | 12 | 19 | 0  | 208 | 21  | 190 | 420 | 449 | 0   | 88  |  |  |  |  |  |  |  |
| 122.61 | 66 | 14 | 29 | 0  | 188 | 38  | 262 | 380 | 462 | 107 | 111 |  |  |  |  |  |  |  |
| 122.71 | 48 | 0  | 16 | 0  | 185 | 59  | 195 | 274 | 476 | 184 | 62  |  |  |  |  |  |  |  |
| 122.81 | 49 | 0  | 0  | 0  | 211 | 107 | 314 | 198 | 417 | 161 | 95  |  |  |  |  |  |  |  |
| 122.90 | 19 | 0  | 0  | 22 | 143 | 91  | 255 | 212 | 428 | 27  | 104 |  |  |  |  |  |  |  |
| 123.01 | 49 | 0  | 0  | 42 | 253 | 109 | 241 | 338 | 492 | 112 | 92  |  |  |  |  |  |  |  |
| 123.11 | 30 | 0  | 0  | 21 | 213 | 102 | 310 | 249 | 492 | 0   | 104 |  |  |  |  |  |  |  |
| 123.21 | 50 | 8  | 0  | 45 | 201 | 150 | 138 | 201 | 521 | 15  | 92  |  |  |  |  |  |  |  |
| 123.31 | 28 | 6  | 5  | 6  | 221 | 80  | 254 | 220 | 483 | 319 | 110 |  |  |  |  |  |  |  |
| 123.40 | 75 | 12 | 15 | 28 | 197 | 110 | 177 | 272 | 647 | 143 | 140 |  |  |  |  |  |  |  |
| 123.51 | 53 | 17 | 29 | 0  | 266 | 87  | 301 | 393 | 611 | 124 | 135 |  |  |  |  |  |  |  |
| 123.60 | 64 | 9  | 22 | 28 | 96  | 23  | 232 | 428 | 511 | 0   | 128 |  |  |  |  |  |  |  |
| 123.71 | 48 | 0  | 11 | 31 | 128 | 34  | 395 | 412 | 447 | 0   | 116 |  |  |  |  |  |  |  |
| 123.81 | 69 | 16 | 9  | 0  | 150 | 34  | 310 | 364 | 401 | 0   | 83  |  |  |  |  |  |  |  |
| 123.91 | 75 | 16 | 12 | 11 | 179 | 42  | 275 | 318 | 380 | 0   | 89  |  |  |  |  |  |  |  |
| 124.01 | 60 | 0  | 12 | 11 | 153 | 103 | 235 | 445 | 374 | 0   | 105 |  |  |  |  |  |  |  |
| 124.11 | 60 | 30 | 10 | 22 | 195 | 81  | 179 | 281 | 436 | 57  | 65  |  |  |  |  |  |  |  |
| 124.21 | 59 | 0  | 0  | 23 | 147 | 80  | 87  | 294 | 489 | 0   | 101 |  |  |  |  |  |  |  |
| 124.31 | 69 | 17 | 0  | 17 | 162 | 73  | 217 | 238 | 462 | 169 | 101 |  |  |  |  |  |  |  |
| 124.41 | 42 | 0  | 0  | 0  | 154 | 113 | 209 | 259 | 455 | 74  | 85  |  |  |  |  |  |  |  |
| 124.51 | 50 | 15 | 0  | 38 | 180 | 89  | 244 | 149 | 443 | 0   | 75  |  |  |  |  |  |  |  |
| 124.60 | 74 | 0  | 0  | 31 | 190 | 24  | 212 | 294 | 521 | 135 | 76  |  |  |  |  |  |  |  |
| 124.70 | 42 | 15 | 0  | 0  | 258 | 109 | 248 | 316 | 508 | 182 | 89  |  |  |  |  |  |  |  |
| 124.80 | 49 | 0  | 0  | 0  | 180 | 79  | 204 | 235 | 462 | 0   | 118 |  |  |  |  |  |  |  |
| 124.91 | 27 | 13 | 0  | 21 | 181 | 169 | 228 | 283 | 505 | 98  | 118 |  |  |  |  |  |  |  |
| 125.01 | 47 | 9  | 29 | 28 | 159 | 58  | 184 | 265 | 540 | 174 | 95  |  |  |  |  |  |  |  |
| 125.10 | 56 | 0  | 0  | 24 | 164 | 55  | 152 | 204 | 537 | 31  | 102 |  |  |  |  |  |  |  |
| 125.20 | 66 | 29 | 6  | 27 | 193 | 77  | 279 | 226 | 558 | 303 | 113 |  |  |  |  |  |  |  |
| 125.31 | 25 | 17 | 0  | 0  | 182 | 90  | 254 | 190 | 619 | 188 | 91  |  |  |  |  |  |  |  |
| 125.41 | 46 | 8  | 0  | 0  | 236 | 103 | 169 | 242 | 542 | 150 | 139 |  |  |  |  |  |  |  |
| 125.51 | 40 | 0  | 0  | 0  | 273 | 48  | 280 | 242 | 611 | 104 | 123 |  |  |  |  |  |  |  |
| 125.61 | 52 | 25 | 16 | 0  | 174 | 54  | 197 | 394 | 623 | 0   | 148 |  |  |  |  |  |  |  |
| 125.71 | 49 | 29 | 0  | 10 | 275 | 0   | 340 | 475 | 531 | 0   | 135 |  |  |  |  |  |  |  |
| 125.81 | 59 | 38 | 29 | 12 | 207 | 87  | 210 | 484 | 447 | 0   | 95  |  |  |  |  |  |  |  |
| 125.91 | 56 | 30 | 27 | 0  | 245 | 47  | 418 | 487 | 440 | 0   | 74  |  |  |  |  |  |  |  |
| 126.01 | 52 | 10 | 0  | 0  | 137 | 51  | 228 | 333 | 419 | 0   | 92  |  |  |  |  |  |  |  |
| 126.11 | 38 | 0  | 0  | 0  | 144 | 20  | 283 | 419 | 407 | 0   | 112 |  |  |  |  |  |  |  |
| 126.21 | 36 | 13 | 6  | 7  | 185 | 29  | 221 | 341 | 409 | 0   | 89  |  |  |  |  |  |  |  |
| 126.31 | 42 | 20 | 0  | 66 | 191 | 64  | 287 | 354 | 465 | 23  | 90  |  |  |  |  |  |  |  |
| 126.41 | 50 | 43 | 44 | 57 | 193 | 83  | 175 | 295 | 510 | 0   | 62  |  |  |  |  |  |  |  |
| 126.50 | 57 | 0  | 13 | 13 | 204 | 77  | 157 | 190 | 504 | 20  | 81  |  |  |  |  |  |  |  |
| 126.61 | 60 | 17 | 0  | 24 | 235 | 131 | 202 | 234 | 491 | 165 | 85  |  |  |  |  |  |  |  |
| 126.71 | 51 | 7  | 15 | 11 | 178 | 79  | 110 | 249 | 490 | 259 | 93  |  |  |  |  |  |  |  |
| 126.81 | 70 | 16 | 12 | 20 | 213 | 66  | 180 | 245 | 538 | 136 | 125 |  |  |  |  |  |  |  |
| 126.90 | 80 | 8  | 0  | 43 | 172 | 96  | 255 | 238 | 553 | 0   | 101 |  |  |  |  |  |  |  |

|        |    |    |    |    |     |     |     |     |     |     |     |  |  |  |  |  |  |  |
|--------|----|----|----|----|-----|-----|-----|-----|-----|-----|-----|--|--|--|--|--|--|--|
| 127.01 | 29 | 0  | 0  | 46 | 245 | 86  | 239 | 331 | 607 | 251 | 74  |  |  |  |  |  |  |  |
| 127.11 | 42 | 25 | 0  | 31 | 195 | 24  | 245 | 217 | 556 | 75  | 90  |  |  |  |  |  |  |  |
| 127.21 | 51 | 0  | 0  | 31 | 228 | 127 | 167 | 193 | 558 | 290 | 102 |  |  |  |  |  |  |  |
| 127.31 | 24 | 0  | 0  | 15 | 202 | 97  | 214 | 38  | 537 | 37  | 104 |  |  |  |  |  |  |  |
| 127.41 | 48 | 15 | 0  | 0  | 191 | 99  | 281 | 289 | 562 | 165 | 72  |  |  |  |  |  |  |  |
| 127.51 | 47 | 8  | 5  | 0  | 238 | 78  | 226 | 133 | 606 | 210 | 85  |  |  |  |  |  |  |  |
| 127.60 | 20 | 0  | 0  | 38 | 210 | 94  | 160 | 298 | 605 | 181 | 75  |  |  |  |  |  |  |  |
| 127.70 | 23 | 17 | 0  | 6  | 218 | 137 | 266 | 185 | 577 | 157 | 82  |  |  |  |  |  |  |  |
| 127.80 | 43 | 0  | 0  | 0  | 250 | 89  | 284 | 216 | 554 | 260 | 82  |  |  |  |  |  |  |  |
| 127.90 | 70 | 0  | 0  | 31 | 215 | 59  | 277 | 227 | 605 | 215 | 86  |  |  |  |  |  |  |  |
| 128.01 | 50 | 0  | 19 | 38 | 228 | 78  | 298 | 287 | 608 | 114 | 93  |  |  |  |  |  |  |  |
| 128.10 | 57 | 23 | 0  | 20 | 173 | 20  | 266 | 372 | 624 | 0   | 96  |  |  |  |  |  |  |  |
| 128.21 | 44 | 10 | 12 | 9  | 220 | 0   | 372 | 489 | 592 | 0   | 73  |  |  |  |  |  |  |  |
| 128.30 | 48 | 34 | 39 | 0  | 219 | 25  | 232 | 451 | 528 | 0   | 122 |  |  |  |  |  |  |  |
| 128.41 | 58 | 14 | 9  | 0  | 204 | 9   | 266 | 450 | 490 | 0   | 83  |  |  |  |  |  |  |  |
| 128.51 | 64 | 33 | 22 | 29 | 190 | 12  | 246 | 423 | 471 | 0   | 71  |  |  |  |  |  |  |  |
| 128.61 | 64 | 20 | 0  | 0  | 188 | 47  | 226 | 368 | 479 | 0   | 98  |  |  |  |  |  |  |  |
| 128.71 | 49 | 11 | 13 | 6  | 129 | 0   | 286 | 303 | 451 | 105 | 71  |  |  |  |  |  |  |  |
| 128.81 | 64 | 22 | 20 | 16 | 171 | 0   | 284 | 335 | 419 | 0   | 72  |  |  |  |  |  |  |  |
| 128.91 | 37 | 27 | 0  | 0  | 196 | 56  | 340 | 258 | 456 | 0   | 60  |  |  |  |  |  |  |  |
| 129.01 | 58 | 0  | 0  | 0  | 193 | 13  | 166 | 291 | 464 | 0   | 73  |  |  |  |  |  |  |  |
| 129.11 | 62 | 17 | 6  | 16 | 192 | 26  | 190 | 381 | 463 | 0   | 96  |  |  |  |  |  |  |  |
| 129.21 | 43 | 6  | 18 | 27 | 156 | 58  | 196 | 233 | 476 | 67  | 82  |  |  |  |  |  |  |  |
| 129.31 | 64 | 0  | 0  | 34 | 223 | 111 | 229 | 321 | 498 | 188 | 88  |  |  |  |  |  |  |  |
| 129.41 | 38 | 0  | 0  | 15 | 190 | 89  | 276 | 351 | 541 | 209 | 73  |  |  |  |  |  |  |  |
| 129.50 | 62 | 17 | 0  | 0  | 177 | 130 | 179 | 213 | 569 | 326 | 78  |  |  |  |  |  |  |  |
| 129.60 | 25 | 0  | 0  | 26 | 170 | 61  | 113 | 256 | 516 | 135 | 85  |  |  |  |  |  |  |  |
| 129.71 | 63 | 21 | 12 | 17 | 218 | 69  | 206 | 159 | 591 | 365 | 80  |  |  |  |  |  |  |  |
| 129.80 | 20 | 36 | 0  | 17 | 181 | 35  | 228 | 161 | 529 | 250 | 89  |  |  |  |  |  |  |  |
| 129.91 | 24 | 29 | 9  | 19 | 180 | 119 | 232 | 258 | 583 | 173 | 89  |  |  |  |  |  |  |  |
| 130.01 | 32 | 13 | 10 | 0  | 208 | 105 | 318 | 247 | 565 | 384 | 121 |  |  |  |  |  |  |  |
| 130.10 | 69 | 17 | 15 | 15 | 231 | 161 | 275 | 331 | 620 | 198 | 57  |  |  |  |  |  |  |  |
| 130.21 | 53 | 0  | 0  | 0  | 273 | 92  | 343 | 289 | 717 | 250 | 106 |  |  |  |  |  |  |  |
| 130.31 | 65 | 26 | 12 | 0  | 249 | 54  | 416 | 307 | 689 | 146 | 90  |  |  |  |  |  |  |  |
| 130.41 | 47 | 0  | 0  | 25 | 219 | 67  | 360 | 382 | 703 | 20  | 89  |  |  |  |  |  |  |  |
| 130.50 | 76 | 8  | 0  | 0  | 225 | 11  | 350 | 429 | 617 | 0   | 109 |  |  |  |  |  |  |  |
| 130.61 | 39 | 16 | 10 | 14 | 192 | 0   | 269 | 478 | 630 | 0   | 59  |  |  |  |  |  |  |  |
| 130.71 | 44 | 13 | 10 | 9  | 228 | 0   | 288 | 388 | 496 | 0   | 126 |  |  |  |  |  |  |  |
| 130.81 | 59 | 23 | 4  | 0  | 191 | 47  | 306 | 332 | 497 | 0   | 109 |  |  |  |  |  |  |  |
| 130.91 | 70 | 6  | 9  | 37 | 184 | 58  | 358 | 409 | 457 | 0   | 34  |  |  |  |  |  |  |  |
| 131.01 | 48 | 14 | 0  | 0  | 250 | 7   | 422 | 352 | 420 | 0   | 104 |  |  |  |  |  |  |  |
| 131.11 | 53 | 28 | 0  | 13 | 226 | 23  | 264 | 336 | 439 | 51  | 48  |  |  |  |  |  |  |  |
| 131.21 | 72 | 14 | 12 | 14 | 197 | 80  | 286 | 293 | 420 | 73  | 77  |  |  |  |  |  |  |  |
| 131.31 | 55 | 19 | 0  | 26 | 134 | 63  | 229 | 219 | 399 | 60  | 67  |  |  |  |  |  |  |  |
| 131.40 | 48 | 21 | 5  | 7  | 231 | 72  | 117 | 301 | 453 | 47  | 92  |  |  |  |  |  |  |  |
| 131.51 | 51 | 0  | 0  | 15 | 170 | 64  | 29  | 124 | 513 | 85  | 93  |  |  |  |  |  |  |  |
| 131.61 | 66 | 0  | 0  | 9  | 176 | 131 | 215 | 330 | 510 | 0   | 90  |  |  |  |  |  |  |  |
| 131.71 | 45 | 0  | 0  | 10 | 240 | 71  | 197 | 167 | 486 | 147 | 85  |  |  |  |  |  |  |  |
| 131.80 | 45 | 0  | 9  | 0  | 177 | 71  | 176 | 242 | 563 | 31  | 113 |  |  |  |  |  |  |  |
| 131.91 | 53 | 0  | 4  | 0  | 111 | 66  | 188 | 270 | 489 | 229 | 65  |  |  |  |  |  |  |  |
| 132.01 | 36 | 0  | 0  | 20 | 192 | 122 | 301 | 338 | 537 | 99  | 35  |  |  |  |  |  |  |  |
| 132.11 | 43 | 21 | 0  | 40 | 213 | 110 | 329 | 247 | 540 | 394 | 109 |  |  |  |  |  |  |  |
| 132.20 | 70 | 6  | 10 | 0  | 222 | 24  | 169 | 226 | 584 | 144 | 96  |  |  |  |  |  |  |  |
| 132.31 | 40 | 23 | 8  | 16 | 226 | 60  | 230 | 263 | 537 | 94  | 87  |  |  |  |  |  |  |  |
| 132.41 | 47 | 0  | 0  | 0  | 227 | 188 | 240 | 301 | 601 | 179 | 126 |  |  |  |  |  |  |  |
| 132.51 | 31 | 0  | 0  | 22 | 218 | 88  | 205 | 303 | 664 | 186 | 103 |  |  |  |  |  |  |  |
| 132.61 | 46 | 0  | 0  | 53 | 244 | 77  | 278 | 250 | 630 | 60  | 74  |  |  |  |  |  |  |  |
| 132.70 | 42 | 6  | 0  | 17 | 194 | 71  | 194 | 178 | 583 | 91  | 100 |  |  |  |  |  |  |  |

|        |    |    |    |    |     |     |     |     |     |     |     |  |  |  |  |  |  |  |  |
|--------|----|----|----|----|-----|-----|-----|-----|-----|-----|-----|--|--|--|--|--|--|--|--|
| 132.81 | 62 | 0  | 0  | 21 | 218 | 29  | 224 | 392 | 642 | 178 | 95  |  |  |  |  |  |  |  |  |
| 132.91 | 50 | 0  | 0  | 25 | 153 | 113 | 142 | 222 | 585 | 211 | 75  |  |  |  |  |  |  |  |  |
| 133.00 | 39 | 0  | 12 | 33 | 267 | 38  | 254 | 305 | 652 | 132 | 96  |  |  |  |  |  |  |  |  |
| 133.11 | 53 | 0  | 0  | 0  | 241 | 17  | 260 | 314 | 671 | 93  | 108 |  |  |  |  |  |  |  |  |
| 133.21 | 43 | 12 | 14 | 0  | 298 | 18  | 248 | 427 | 625 | 0   | 118 |  |  |  |  |  |  |  |  |
| 133.31 | 39 | 32 | 7  | 39 | 232 | 53  | 429 | 447 | 526 | 0   | 97  |  |  |  |  |  |  |  |  |
| 133.40 | 45 | 17 | 23 | 0  | 231 | 33  | 317 | 465 | 551 | 0   | 111 |  |  |  |  |  |  |  |  |
| 133.51 | 63 | 0  | 0  | 0  | 192 | 11  | 258 | 500 | 447 | 0   | 79  |  |  |  |  |  |  |  |  |
| 133.61 | 60 | 24 | 25 | 10 | 185 | 27  | 355 | 496 | 433 | 46  | 51  |  |  |  |  |  |  |  |  |
| 133.71 | 61 | 19 | 14 | 9  | 190 | 32  | 278 | 420 | 406 | 0   | 93  |  |  |  |  |  |  |  |  |
| 133.81 | 43 | 26 | 0  | 0  | 168 | 0   | 278 | 343 | 440 | 0   | 67  |  |  |  |  |  |  |  |  |
| 133.91 | 36 | 24 | 0  | 0  | 157 | 37  | 275 | 368 | 439 | 0   | 67  |  |  |  |  |  |  |  |  |
| 134.00 | 63 | 7  | 0  | 9  | 176 | 72  | 118 | 287 | 452 | 0   | 72  |  |  |  |  |  |  |  |  |
| 134.10 | 51 | 0  | 13 | 13 | 187 | 76  | 228 | 365 | 464 | 117 | 106 |  |  |  |  |  |  |  |  |
| 134.20 | 56 | 16 | 8  | 0  | 105 | 47  | 157 | 268 | 504 | 121 | 73  |  |  |  |  |  |  |  |  |
| 134.31 | 75 | 12 | 13 | 15 | 149 | 15  | 196 | 224 | 521 | 173 | 73  |  |  |  |  |  |  |  |  |
| 134.41 | 65 | 0  | 0  | 35 | 214 | 89  | 238 | 262 | 586 | 7   | 107 |  |  |  |  |  |  |  |  |
| 134.51 | 40 | 0  | 0  | 0  | 171 | 33  | 109 | 301 | 598 | 195 | 89  |  |  |  |  |  |  |  |  |
| 134.60 | 52 | 18 | 33 | 0  | 204 | 26  | 255 | 243 | 629 | 157 | 104 |  |  |  |  |  |  |  |  |
| 134.71 | 62 | 18 | 15 | 0  | 193 | 106 | 116 | 162 | 582 | 284 | 69  |  |  |  |  |  |  |  |  |
| 134.81 | 69 | 5  | 6  | 0  | 206 | 85  | 220 | 147 | 596 | 61  | 75  |  |  |  |  |  |  |  |  |
| 134.90 | 70 | 21 | 0  | 0  | 157 | 149 | 206 | 169 | 574 | 191 | 81  |  |  |  |  |  |  |  |  |
| 135.01 | 53 | 9  | 0  | 0  | 166 | 84  | 206 | 204 | 584 | 332 | 80  |  |  |  |  |  |  |  |  |
| 135.11 | 39 | 6  | 0  | 45 | 172 | 84  | 276 | 267 | 595 | 244 | 99  |  |  |  |  |  |  |  |  |
| 135.21 | 55 | 8  | 0  | 0  | 157 | 145 | 264 | 230 | 599 | 108 | 111 |  |  |  |  |  |  |  |  |
| 135.31 | 50 | 0  | 0  | 0  | 160 | 96  | 206 | 207 | 621 | 146 | 118 |  |  |  |  |  |  |  |  |
| 135.40 | 59 | 0  | 0  | 26 | 185 | 176 | 207 | 195 | 621 | 180 | 90  |  |  |  |  |  |  |  |  |
| 135.50 | 41 | 22 | 0  | 32 | 210 | 116 | 300 | 295 | 627 | 184 | 104 |  |  |  |  |  |  |  |  |
| 135.61 | 38 | 0  | 23 | 0  | 207 | 85  | 202 | 171 | 630 | 328 | 116 |  |  |  |  |  |  |  |  |
| 135.71 | 42 | 0  | 0  | 37 | 204 | 56  | 210 | 242 | 614 | 155 | 73  |  |  |  |  |  |  |  |  |
| 135.80 | 13 | 0  | 7  | 43 | 225 | 102 | 175 | 197 | 659 | 0   | 58  |  |  |  |  |  |  |  |  |
| 135.90 | 42 | 0  | 0  | 0  | 264 | 151 | 218 | 215 | 689 | 183 | 72  |  |  |  |  |  |  |  |  |
| 136.00 | 61 | 10 | 5  | 0  | 255 | 77  | 102 | 209 | 610 | 285 | 95  |  |  |  |  |  |  |  |  |
| 136.11 | 56 | 6  | 0  | 19 | 238 | 136 | 249 | 263 | 707 | 181 | 120 |  |  |  |  |  |  |  |  |
| 136.20 | 50 | 0  | 0  | 31 | 217 | 74  | 207 | 359 | 737 | 180 | 71  |  |  |  |  |  |  |  |  |
| 136.30 | 19 | 13 | 0  | 0  | 252 | 86  | 261 | 427 | 766 | 13  | 141 |  |  |  |  |  |  |  |  |
| 136.40 | 62 | 43 | 5  | 11 | 299 | 0   | 248 | 360 | 678 | 36  | 150 |  |  |  |  |  |  |  |  |
| 136.50 | 49 | 9  | 6  | 21 | 221 | 72  | 371 | 536 | 644 | 0   | 90  |  |  |  |  |  |  |  |  |
| 136.61 | 50 | 19 | 0  | 34 | 208 | 20  | 275 | 394 | 542 | 0   | 83  |  |  |  |  |  |  |  |  |
| 136.71 | 43 | 21 | 12 | 0  | 176 | 20  | 385 | 383 | 463 | 0   | 62  |  |  |  |  |  |  |  |  |
| 136.81 | 64 | 6  | 0  | 0  | 215 | 77  | 212 | 503 | 424 | 0   | 82  |  |  |  |  |  |  |  |  |
| 136.90 | 71 | 16 | 6  | 0  | 196 | 44  | 229 | 457 | 465 | 93  | 79  |  |  |  |  |  |  |  |  |
| 137.00 | 51 | 6  | 11 | 66 | 174 | 106 | 206 | 315 | 482 | 0   | 80  |  |  |  |  |  |  |  |  |
| 137.11 | 84 | 0  | 0  | 0  | 171 | 110 | 82  | 184 | 538 | 93  | 82  |  |  |  |  |  |  |  |  |
| 137.20 | 60 | 0  | 20 | 0  | 254 | 49  | 182 | 263 | 524 | 46  | 63  |  |  |  |  |  |  |  |  |
| 137.31 | 97 | 21 | 8  | 20 | 196 | 82  | 224 | 267 | 539 | 200 | 73  |  |  |  |  |  |  |  |  |
| 137.40 | 44 | 11 | 0  | 41 | 186 | 46  | 189 | 288 | 499 | 210 | 62  |  |  |  |  |  |  |  |  |
| 137.51 | 60 | 0  | 0  | 6  | 195 | 99  | 166 | 298 | 516 | 175 | 103 |  |  |  |  |  |  |  |  |
| 137.60 | 37 | 0  | 17 | 7  | 213 | 111 | 169 | 242 | 552 | 293 | 77  |  |  |  |  |  |  |  |  |
| 137.71 | 41 | 5  | 0  | 0  | 274 | 75  | 106 | 234 | 584 | 0   | 35  |  |  |  |  |  |  |  |  |
| 137.81 | 51 | 0  | 0  | 36 | 194 | 48  | 279 | 300 | 580 | 0   | 86  |  |  |  |  |  |  |  |  |
| 137.91 | 57 | 8  | 0  | 24 | 230 | 95  | 196 | 229 | 512 | 223 | 84  |  |  |  |  |  |  |  |  |
| 138.01 | 44 | 0  | 8  | 0  | 213 | 68  | 305 | 329 | 548 | 64  | 84  |  |  |  |  |  |  |  |  |
| 138.11 | 41 | 13 | 0  | 0  | 186 | 87  | 156 | 165 | 569 | 119 | 116 |  |  |  |  |  |  |  |  |
| 138.21 | 51 | 0  | 0  | 39 | 193 | 73  | 233 | 269 | 533 | 282 | 106 |  |  |  |  |  |  |  |  |
| 138.31 | 64 | 31 | 0  | 21 | 279 | 60  | 207 | 113 | 564 | 355 | 134 |  |  |  |  |  |  |  |  |
| 138.41 | 51 | 16 | 0  | 16 | 216 | 78  | 119 | 257 | 613 | 295 | 135 |  |  |  |  |  |  |  |  |
| 138.50 | 36 | 23 | 0  | 12 | 155 | 71  | 175 | 297 | 543 | 360 | 92  |  |  |  |  |  |  |  |  |

|        |    |    |    |    |     |     |     |     |     |     |     |  |  |  |  |  |  |  |  |
|--------|----|----|----|----|-----|-----|-----|-----|-----|-----|-----|--|--|--|--|--|--|--|--|
| 138.61 | 44 | 0  | 0  | 12 | 247 | 101 | 216 | 237 | 582 | 192 | 113 |  |  |  |  |  |  |  |  |
| 138.70 | 51 | 5  | 0  | 9  | 210 | 68  | 280 | 223 | 598 | 183 | 82  |  |  |  |  |  |  |  |  |
| 138.80 | 59 | 12 | 0  | 0  | 223 | 136 | 159 | 206 | 671 | 191 | 81  |  |  |  |  |  |  |  |  |
| 138.91 | 57 | 17 | 0  | 9  | 204 | 90  | 162 | 227 | 583 | 353 | 111 |  |  |  |  |  |  |  |  |
| 139.01 | 51 | 0  | 18 | 0  | 189 | 89  | 218 | 259 | 626 | 273 | 88  |  |  |  |  |  |  |  |  |
| 139.10 | 61 | 17 | 0  | 0  | 186 | 88  | 210 | 309 | 681 | 126 | 87  |  |  |  |  |  |  |  |  |
| 139.21 | 62 | 19 | 0  | 26 | 258 | 69  | 171 | 272 | 676 | 255 | 88  |  |  |  |  |  |  |  |  |
| 139.31 | 54 | 20 | 9  | 30 | 235 | 50  | 290 | 267 | 709 | 121 | 131 |  |  |  |  |  |  |  |  |
| 139.41 | 31 | 0  | 0  | 18 | 268 | 31  | 334 | 347 | 753 | 0   | 98  |  |  |  |  |  |  |  |  |
| 139.50 | 52 | 41 | 9  | 0  | 250 | 0   | 442 | 277 | 642 | 0   | 83  |  |  |  |  |  |  |  |  |
| 139.61 | 47 | 7  | 0  | 45 | 216 | 55  | 300 | 402 | 577 | 0   | 89  |  |  |  |  |  |  |  |  |
| 139.70 | 52 | 0  | 16 | 0  | 207 | 24  | 278 | 242 | 530 | 74  | 97  |  |  |  |  |  |  |  |  |
| 139.81 | 58 | 37 | 0  | 22 | 168 | 48  | 391 | 459 | 476 | 0   | 64  |  |  |  |  |  |  |  |  |
| 139.91 | 46 | 0  | 7  | 0  | 182 | 62  | 251 | 382 | 457 | 127 | 118 |  |  |  |  |  |  |  |  |
| 140.01 | 30 | 0  | 0  | 0  | 190 | 14  | 273 | 387 | 465 | 0   | 42  |  |  |  |  |  |  |  |  |
| 140.10 | 55 | 0  | 22 | 20 | 192 | 52  | 190 | 269 | 483 | 0   | 107 |  |  |  |  |  |  |  |  |
| 140.21 | 50 | 27 | 8  | 8  | 179 | 15  | 287 | 410 | 479 | 0   | 73  |  |  |  |  |  |  |  |  |
| 140.31 | 43 | 11 | 0  | 9  | 196 | 55  | 97  | 392 | 461 | 0   | 97  |  |  |  |  |  |  |  |  |
| 140.41 | 35 | 0  | 0  | 10 | 175 | 50  | 231 | 277 | 472 | 96  | 72  |  |  |  |  |  |  |  |  |
| 140.51 | 93 | 0  | 0  | 13 | 184 | 67  | 207 | 296 | 507 | 124 | 93  |  |  |  |  |  |  |  |  |
| 140.61 | 53 | 0  | 0  | 15 | 223 | 89  | 271 | 283 | 546 | 0   | 66  |  |  |  |  |  |  |  |  |
| 140.71 | 40 | 5  | 8  | 37 | 196 | 69  | 205 | 255 | 509 | 57  | 75  |  |  |  |  |  |  |  |  |
| 140.81 | 52 | 13 | 16 | 0  | 143 | 70  | 267 | 244 | 493 | 119 | 83  |  |  |  |  |  |  |  |  |
| 140.91 | 51 | 30 | 5  | 21 | 176 | 37  | 229 | 151 | 612 | 316 | 107 |  |  |  |  |  |  |  |  |
| 141.01 | 49 | 25 | 0  | 0  | 250 | 124 | 217 | 287 | 610 | 190 | 86  |  |  |  |  |  |  |  |  |
| 141.11 | 61 | 0  | 0  | 28 | 248 | 81  | 109 | 258 | 616 | 303 | 99  |  |  |  |  |  |  |  |  |
| 141.20 | 68 | 6  | 0  | 11 | 258 | 71  | 278 | 352 | 597 | 94  | 108 |  |  |  |  |  |  |  |  |
| 141.31 | 43 | 23 | 0  | 0  | 246 | 109 | 306 | 311 | 651 | 139 | 91  |  |  |  |  |  |  |  |  |
| 141.40 | 45 | 0  | 0  | 0  | 210 | 88  | 309 | 211 | 645 | 132 | 128 |  |  |  |  |  |  |  |  |
| 141.50 | 55 | 18 | 7  | 71 | 197 | 93  | 114 | 250 | 644 | 234 | 84  |  |  |  |  |  |  |  |  |
| 141.60 | 51 | 14 | 0  | 25 | 170 | 83  | 264 | 181 | 599 | 91  | 95  |  |  |  |  |  |  |  |  |
| 141.71 | 82 | 7  | 17 | 6  | 230 | 162 | 225 | 253 | 597 | 91  | 88  |  |  |  |  |  |  |  |  |
| 141.81 | 63 | 5  | 12 | 0  | 221 | 120 | 269 | 233 | 637 | 0   | 86  |  |  |  |  |  |  |  |  |
| 141.91 | 57 | 16 | 0  | 0  | 223 | 150 | 188 | 293 | 597 | 257 | 101 |  |  |  |  |  |  |  |  |
| 142.00 | 53 | 10 | 0  | 28 | 204 | 49  | 201 | 352 | 611 | 214 | 85  |  |  |  |  |  |  |  |  |
| 142.11 | 45 | 18 | 0  | 18 | 221 | 61  | 249 | 263 | 576 | 0   | 81  |  |  |  |  |  |  |  |  |
| 142.21 | 78 | 29 | 0  | 18 | 175 | 54  | 145 | 348 | 589 | 89  | 106 |  |  |  |  |  |  |  |  |
| 142.30 | 54 | 0  | 16 | 19 | 147 | 14  | 299 | 254 | 575 | 287 | 98  |  |  |  |  |  |  |  |  |
| 142.40 | 48 | 18 | 0  | 0  | 221 | 78  | 312 | 238 | 593 | 106 | 107 |  |  |  |  |  |  |  |  |
| 142.51 | 48 | 21 | 0  | 31 | 209 | 32  | 249 | 200 | 618 | 187 | 89  |  |  |  |  |  |  |  |  |
| 142.60 | 62 | 0  | 0  | 12 | 191 | 73  | 265 | 220 | 620 | 150 | 95  |  |  |  |  |  |  |  |  |
| 142.71 | 61 | 0  | 12 | 19 | 232 | 73  | 232 | 288 | 580 | 69  | 82  |  |  |  |  |  |  |  |  |
| 142.81 | 43 | 16 | 7  | 0  | 235 | 80  | 326 | 210 | 635 | 226 | 53  |  |  |  |  |  |  |  |  |
| 142.91 | 42 | 13 | 0  | 8  | 217 | 70  | 294 | 316 | 669 | 106 | 92  |  |  |  |  |  |  |  |  |
| 143.01 | 34 | 6  | 0  | 0  | 208 | 47  | 237 | 392 | 689 | 62  | 110 |  |  |  |  |  |  |  |  |
| 143.11 | 49 | 9  | 0  | 0  | 195 | 93  | 227 | 316 | 632 | 0   | 101 |  |  |  |  |  |  |  |  |
| 143.21 | 39 | 10 | 0  | 44 | 244 | 39  | 257 | 252 | 767 | 116 | 109 |  |  |  |  |  |  |  |  |
| 143.30 | 65 | 0  | 12 | 68 | 276 | 5   | 160 | 422 | 693 | 0   | 118 |  |  |  |  |  |  |  |  |
| 143.41 | 59 | 28 | 0  | 0  | 240 | 0   | 342 | 454 | 662 | 214 | 98  |  |  |  |  |  |  |  |  |
| 143.51 | 39 | 25 | 8  | 0  | 202 | 45  | 305 | 340 | 601 | 0   | 107 |  |  |  |  |  |  |  |  |
| 143.61 | 51 | 33 | 11 | 29 | 198 | 60  | 184 | 354 | 612 | 0   | 110 |  |  |  |  |  |  |  |  |
| 143.71 | 53 | 9  | 26 | 0  | 159 | 14  | 256 | 458 | 539 | 0   | 105 |  |  |  |  |  |  |  |  |
| 143.81 | 54 | 28 | 17 | 5  | 200 | 16  | 257 | 472 | 543 | 0   | 79  |  |  |  |  |  |  |  |  |
| 143.91 | 48 | 20 | 11 | 33 | 162 | 0   | 338 | 441 | 496 | 0   | 76  |  |  |  |  |  |  |  |  |
| 144.01 | 81 | 37 | 33 | 0  | 228 | 0   | 324 | 441 | 494 | 120 | 69  |  |  |  |  |  |  |  |  |
| 144.11 | 63 | 27 | 9  | 0  | 119 | 37  | 253 | 372 | 503 | 0   | 74  |  |  |  |  |  |  |  |  |
| 144.21 | 18 | 34 | 18 | 26 | 144 | 35  | 294 | 359 | 459 | 0   | 85  |  |  |  |  |  |  |  |  |
| 144.31 | 55 | 22 | 6  | 0  | 175 | 43  | 282 | 399 | 456 | 0   | 93  |  |  |  |  |  |  |  |  |

|        |    |    |    |    |     |     |     |     |     |     |     |  |  |  |  |  |  |  |  |
|--------|----|----|----|----|-----|-----|-----|-----|-----|-----|-----|--|--|--|--|--|--|--|--|
| 144.41 | 27 | 19 | 5  | 23 | 137 | 0   | 236 | 377 | 466 | 0   | 97  |  |  |  |  |  |  |  |  |
| 144.51 | 64 | 23 | 13 | 26 | 199 | 42  | 294 | 351 | 456 | 0   | 69  |  |  |  |  |  |  |  |  |
| 144.60 | 57 | 24 | 0  | 0  | 188 | 63  | 271 | 363 | 516 | 0   | 83  |  |  |  |  |  |  |  |  |
| 144.71 | 34 | 0  | 0  | 24 | 167 | 37  | 221 | 346 | 528 | 18  | 59  |  |  |  |  |  |  |  |  |
| 144.81 | 62 | 17 | 0  | 0  | 238 | 74  | 243 | 227 | 525 | 144 | 113 |  |  |  |  |  |  |  |  |
| 144.91 | 69 | 9  | 0  | 0  | 237 | 89  | 167 | 254 | 574 | 0   | 92  |  |  |  |  |  |  |  |  |
| 145.00 | 56 | 28 | 5  | 50 | 240 | 83  | 220 | 338 | 626 | 0   | 114 |  |  |  |  |  |  |  |  |
| 145.10 | 59 | 11 | 12 | 0  | 275 | 61  | 282 | 345 | 650 | 0   | 73  |  |  |  |  |  |  |  |  |
| 145.20 | 40 | 15 | 10 | 10 | 209 | 83  | 262 | 359 | 672 | 195 | 105 |  |  |  |  |  |  |  |  |
| 145.30 | 87 | 8  | 0  | 33 | 227 | 46  | 238 | 240 | 662 | 0   | 101 |  |  |  |  |  |  |  |  |
| 145.40 | 36 | 6  | 0  | 27 | 260 | 121 | 211 | 312 | 744 | 165 | 88  |  |  |  |  |  |  |  |  |
| 145.51 | 63 | 0  | 26 | 0  | 212 | 115 | 324 | 377 | 698 | 93  | 83  |  |  |  |  |  |  |  |  |
| 145.61 | 74 | 11 | 13 | 0  | 282 | 94  | 200 | 219 | 682 | 156 | 91  |  |  |  |  |  |  |  |  |
| 145.71 | 64 | 0  | 0  | 11 | 195 | 96  | 269 | 295 | 671 | 0   | 111 |  |  |  |  |  |  |  |  |
| 145.81 | 61 | 5  | 16 | 5  | 229 | 46  | 279 | 310 | 682 | 184 | 99  |  |  |  |  |  |  |  |  |
| 145.91 | 57 | 6  | 0  | 35 | 234 | 25  | 311 | 276 | 658 | 187 | 110 |  |  |  |  |  |  |  |  |
| 146.00 | 74 | 0  | 9  | 14 | 197 | 84  | 258 | 360 | 634 | 0   | 104 |  |  |  |  |  |  |  |  |
| 146.10 | 43 | 15 | 15 | 27 | 236 | 120 | 204 | 297 | 695 | 252 | 132 |  |  |  |  |  |  |  |  |
| 146.20 | 43 | 0  | 0  | 18 | 205 | 153 | 266 | 233 | 685 | 149 | 87  |  |  |  |  |  |  |  |  |
| 146.31 | 52 | 21 | 0  | 25 | 254 | 82  | 273 | 346 | 731 | 325 | 95  |  |  |  |  |  |  |  |  |
| 146.40 | 29 | 0  | 0  | 45 | 238 | 61  | 172 | 217 | 696 | 216 | 116 |  |  |  |  |  |  |  |  |
| 146.50 | 43 | 0  | 0  | 0  | 223 | 80  | 287 | 290 | 708 | 87  | 107 |  |  |  |  |  |  |  |  |
| 146.61 | 64 | 0  | 0  | 43 | 248 | 76  | 302 | 207 | 663 | 299 | 115 |  |  |  |  |  |  |  |  |
| 146.70 | 58 | 7  | 0  | 32 | 284 | 92  | 209 | 446 | 694 | 171 | 124 |  |  |  |  |  |  |  |  |
| 146.81 | 69 | 28 | 0  | 13 | 283 | 83  | 247 | 302 | 691 | 83  | 74  |  |  |  |  |  |  |  |  |
| 146.90 | 83 | 18 | 32 | 0  | 286 | 19  | 303 | 278 | 767 | 122 | 130 |  |  |  |  |  |  |  |  |
| 147.00 | 63 | 0  | 15 | 0  | 286 | 62  | 364 | 293 | 764 | 73  | 127 |  |  |  |  |  |  |  |  |
| 147.10 | 75 | 15 | 0  | 21 | 244 | 0   | 383 | 340 | 768 | 95  | 116 |  |  |  |  |  |  |  |  |
| 147.21 | 50 | 11 | 8  | 22 | 250 | 11  | 320 | 358 | 634 | 39  | 104 |  |  |  |  |  |  |  |  |
| 147.31 | 55 | 10 | 0  | 0  | 251 | 12  | 335 | 393 | 684 | 13  | 76  |  |  |  |  |  |  |  |  |
| 147.41 | 57 | 24 | 0  | 11 | 236 | 25  | 210 | 467 | 631 | 0   | 101 |  |  |  |  |  |  |  |  |
| 147.50 | 41 | 18 | 0  | 0  | 255 | 16  | 277 | 401 | 621 | 0   | 113 |  |  |  |  |  |  |  |  |
| 147.60 | 57 | 0  | 0  | 0  | 214 | 0   | 240 | 380 | 633 | 0   | 111 |  |  |  |  |  |  |  |  |
| 147.70 | 67 | 7  | 23 | 18 | 272 | 72  | 352 | 512 | 605 | 0   | 108 |  |  |  |  |  |  |  |  |
| 147.81 | 46 | 8  | 10 | 0  | 235 | 0   | 225 | 374 | 552 | 0   | 105 |  |  |  |  |  |  |  |  |
| 147.91 | 66 | 21 | 5  | 0  | 215 | 12  | 230 | 282 | 514 | 0   | 99  |  |  |  |  |  |  |  |  |
| 148.01 | 52 | 34 | 11 | 7  | 206 | 14  | 386 | 366 | 570 | 0   | 93  |  |  |  |  |  |  |  |  |
| 148.10 | 69 | 23 | 20 | 11 | 230 | 38  | 265 | 304 | 603 | 0   | 82  |  |  |  |  |  |  |  |  |
| 148.21 | 33 | 15 | 0  | 44 | 230 | 107 | 293 | 257 | 623 | 15  | 94  |  |  |  |  |  |  |  |  |
| 148.30 | 66 | 21 | 19 | 0  | 240 | 10  | 175 | 258 | 545 | 0   | 80  |  |  |  |  |  |  |  |  |
| 148.41 | 51 | 0  | 0  | 43 | 209 | 76  | 229 | 379 | 588 | 169 | 81  |  |  |  |  |  |  |  |  |
| 148.51 | 36 | 24 | 0  | 26 | 268 | 10  | 218 | 212 | 599 | 0   | 83  |  |  |  |  |  |  |  |  |
| 148.61 | 67 | 8  | 0  | 0  | 202 | 25  | 250 | 337 | 573 | 64  | 88  |  |  |  |  |  |  |  |  |
| 148.71 | 63 | 0  | 0  | 11 | 245 | 60  | 194 | 266 | 595 | 0   | 71  |  |  |  |  |  |  |  |  |
| 148.80 | 39 | 18 | 0  | 45 | 237 | 5   | 344 | 387 | 688 | 138 | 70  |  |  |  |  |  |  |  |  |
| 148.91 | 56 | 13 | 0  | 0  | 248 | 64  | 344 | 380 | 645 | 66  | 99  |  |  |  |  |  |  |  |  |
| 149.00 | 36 | 40 | 15 | 0  | 242 | 64  | 204 | 174 | 663 | 67  | 78  |  |  |  |  |  |  |  |  |
| 149.11 | 56 | 14 | 0  | 27 | 256 | 27  | 316 | 270 | 671 | 52  | 80  |  |  |  |  |  |  |  |  |
| 149.21 | 74 | 6  | 4  | 11 | 252 | 89  | 261 | 302 | 652 | 205 | 105 |  |  |  |  |  |  |  |  |
| 149.30 | 51 | 0  | 0  | 35 | 210 | 93  | 312 | 216 | 624 | 140 | 87  |  |  |  |  |  |  |  |  |
| 149.40 | 60 | 14 | 9  | 7  | 220 | 73  | 209 | 286 | 633 | 61  | 108 |  |  |  |  |  |  |  |  |
| 149.51 | 64 | 21 | 7  | 51 | 256 | 55  | 181 | 301 | 672 | 49  | 96  |  |  |  |  |  |  |  |  |
| 149.61 | 43 | 15 | 8  | 0  | 256 | 70  | 296 | 239 | 703 | 31  | 99  |  |  |  |  |  |  |  |  |
| 149.71 | 49 | 23 | 7  | 0  | 228 | 62  | 281 | 233 | 691 | 83  | 109 |  |  |  |  |  |  |  |  |
| 149.81 | 62 | 31 | 0  | 0  | 268 | 60  | 213 | 259 | 675 | 194 | 119 |  |  |  |  |  |  |  |  |
| 149.91 | 58 | 5  | 0  | 0  | 288 | 70  | 354 | 330 | 660 | 154 | 124 |  |  |  |  |  |  |  |  |
| 150.01 | 21 | 0  | 0  | 53 | 263 | 37  | 332 | 223 | 705 | 235 | 102 |  |  |  |  |  |  |  |  |
| 150.10 | 53 | 22 | 0  | 22 | 203 | 75  | 242 | 298 | 693 | 53  | 99  |  |  |  |  |  |  |  |  |

|        |    |    |    |    |     |     |     |     |      |     |     |  |  |  |  |  |  |  |
|--------|----|----|----|----|-----|-----|-----|-----|------|-----|-----|--|--|--|--|--|--|--|
| 150.20 | 27 | 8  | 0  | 0  | 288 | 24  | 134 | 167 | 726  | 107 | 107 |  |  |  |  |  |  |  |
| 150.31 | 43 | 0  | 0  | 59 | 310 | 83  | 294 | 269 | 782  | 78  | 107 |  |  |  |  |  |  |  |
| 150.41 | 58 | 29 | 27 | 16 | 271 | 33  | 287 | 342 | 775  | 179 | 126 |  |  |  |  |  |  |  |
| 150.51 | 58 | 34 | 10 | 0  | 337 | 50  | 282 | 348 | 736  | 6   | 123 |  |  |  |  |  |  |  |
| 150.61 | 50 | 16 | 0  | 0  | 352 | 89  | 279 | 284 | 715  | 68  | 87  |  |  |  |  |  |  |  |
| 150.71 | 67 | 0  | 0  | 11 | 296 | 139 | 250 | 206 | 792  | 88  | 115 |  |  |  |  |  |  |  |
| 150.80 | 61 | 9  | 9  | 0  | 264 | 110 | 183 | 372 | 801  | 238 | 111 |  |  |  |  |  |  |  |
| 150.91 | 59 | 0  | 6  | 0  | 266 | 30  | 310 | 323 | 804  | 189 | 138 |  |  |  |  |  |  |  |
| 151.01 | 60 | 18 | 7  | 19 | 354 | 53  | 180 | 312 | 806  | 44  | 125 |  |  |  |  |  |  |  |
| 151.11 | 33 | 21 | 7  | 25 | 354 | 55  | 245 | 333 | 755  | 37  | 127 |  |  |  |  |  |  |  |
| 151.21 | 77 | 26 | 11 | 20 | 311 | 18  | 346 | 340 | 752  | 141 | 129 |  |  |  |  |  |  |  |
| 151.30 | 59 | 21 | 17 | 31 | 290 | 25  | 233 | 357 | 793  | 121 | 117 |  |  |  |  |  |  |  |
| 151.41 | 84 | 15 | 14 | 10 | 263 | 27  | 279 | 427 | 732  | 179 | 117 |  |  |  |  |  |  |  |
| 151.50 | 46 | 7  | 0  | 20 | 268 | 6   | 365 | 332 | 735  | 33  | 99  |  |  |  |  |  |  |  |
| 151.60 | 64 | 19 | 12 | 0  | 347 | 0   | 273 | 377 | 709  | 0   | 122 |  |  |  |  |  |  |  |
| 151.70 | 44 | 24 | 24 | 0  | 265 | 43  | 388 | 377 | 764  | 0   | 100 |  |  |  |  |  |  |  |
| 151.80 | 44 | 16 | 0  | 21 | 324 | 30  | 362 | 389 | 675  | 37  | 127 |  |  |  |  |  |  |  |
| 151.90 | 37 | 34 | 7  | 15 | 319 | 46  | 285 | 428 | 733  | 50  | 91  |  |  |  |  |  |  |  |
| 152.00 | 66 | 0  | 31 | 0  | 255 | 88  | 326 | 396 | 696  | 0   | 116 |  |  |  |  |  |  |  |
| 152.11 | 43 | 15 | 0  | 0  | 319 | 49  | 279 | 365 | 621  | 0   | 90  |  |  |  |  |  |  |  |
| 152.21 | 76 | 22 | 12 | 10 | 217 | 39  | 272 | 244 | 684  | 76  | 105 |  |  |  |  |  |  |  |
| 152.31 | 69 | 23 | 12 | 19 | 246 | 21  | 194 | 358 | 718  | 87  | 114 |  |  |  |  |  |  |  |
| 152.41 | 51 | 22 | 16 | 17 | 265 | 83  | 249 | 381 | 709  | 0   | 109 |  |  |  |  |  |  |  |
| 152.51 | 61 | 8  | 18 | 43 | 259 | 95  | 241 | 288 | 697  | 0   | 104 |  |  |  |  |  |  |  |
| 152.61 | 39 | 0  | 5  | 0  | 278 | 75  | 327 | 243 | 680  | 71  | 99  |  |  |  |  |  |  |  |
| 152.70 | 60 | 16 | 0  | 0  | 235 | 0   | 323 | 327 | 634  | 0   | 100 |  |  |  |  |  |  |  |
| 152.81 | 43 | 15 | 0  | 47 | 291 | 64  | 250 | 266 | 687  | 0   | 96  |  |  |  |  |  |  |  |
| 152.91 | 29 | 18 | 10 | 25 | 315 | 79  | 253 | 271 | 720  | 0   | 95  |  |  |  |  |  |  |  |
| 153.01 | 32 | 17 | 0  | 0  | 269 | 74  | 186 | 241 | 769  | 0   | 98  |  |  |  |  |  |  |  |
| 153.11 | 64 | 0  | 0  | 14 | 291 | 99  | 213 | 220 | 818  | 0   | 112 |  |  |  |  |  |  |  |
| 153.21 | 26 | 11 | 0  | 0  | 256 | 65  | 183 | 252 | 746  | 140 | 109 |  |  |  |  |  |  |  |
| 153.30 | 36 | 0  | 7  | 0  | 271 | 50  | 201 | 257 | 648  | 0   | 94  |  |  |  |  |  |  |  |
| 153.40 | 42 | 0  | 0  | 20 | 284 | 95  | 200 | 378 | 760  | 82  | 125 |  |  |  |  |  |  |  |
| 153.50 | 48 | 11 | 0  | 20 | 257 | 23  | 175 | 312 | 683  | 287 | 104 |  |  |  |  |  |  |  |
| 153.61 | 59 | 0  | 0  | 25 | 283 | 65  | 123 | 204 | 667  | 102 | 114 |  |  |  |  |  |  |  |
| 153.71 | 62 | 12 | 0  | 0  | 256 | 109 | 198 | 338 | 751  | 227 | 78  |  |  |  |  |  |  |  |
| 153.81 | 34 | 0  | 26 | 0  | 281 | 71  | 275 | 275 | 728  | 198 | 110 |  |  |  |  |  |  |  |
| 153.90 | 64 | 19 | 16 | 0  | 260 | 73  | 287 | 335 | 788  | 81  | 77  |  |  |  |  |  |  |  |
| 154.01 | 64 | 23 | 0  | 18 | 251 | 30  | 189 | 256 | 782  | 208 | 122 |  |  |  |  |  |  |  |
| 154.11 | 45 | 15 | 0  | 45 | 283 | 54  | 281 | 274 | 744  | 0   | 93  |  |  |  |  |  |  |  |
| 154.21 | 63 | 8  | 17 | 0  | 264 | 113 | 122 | 195 | 749  | 198 | 109 |  |  |  |  |  |  |  |
| 154.31 | 37 | 18 | 0  | 18 | 212 | 70  | 242 | 197 | 756  | 220 | 95  |  |  |  |  |  |  |  |
| 154.41 | 53 | 5  | 0  | 0  | 350 | 97  | 250 | 425 | 769  | 208 | 123 |  |  |  |  |  |  |  |
| 154.50 | 41 | 18 | 0  | 25 | 277 | 74  | 235 | 301 | 810  | 176 | 110 |  |  |  |  |  |  |  |
| 154.60 | 56 | 19 | 13 | 0  | 268 | 82  | 331 | 360 | 837  | 217 | 131 |  |  |  |  |  |  |  |
| 154.71 | 52 | 20 | 12 | 23 | 285 | 82  | 232 | 271 | 815  | 242 | 117 |  |  |  |  |  |  |  |
| 154.81 | 69 | 5  | 0  | 0  | 246 | 77  | 201 | 352 | 821  | 195 | 123 |  |  |  |  |  |  |  |
| 154.91 | 45 | 0  | 8  | 15 | 359 | 53  | 275 | 233 | 849  | 169 | 113 |  |  |  |  |  |  |  |
| 155.01 | 61 | 15 | 21 | 0  | 275 | 108 | 236 | 345 | 907  | 100 | 149 |  |  |  |  |  |  |  |
| 155.11 | 35 | 0  | 0  | 18 | 281 | 140 | 300 | 304 | 884  | 70  | 130 |  |  |  |  |  |  |  |
| 155.20 | 69 | 21 | 9  | 29 | 326 | 43  | 173 | 270 | 842  | 0   | 131 |  |  |  |  |  |  |  |
| 155.31 | 66 | 0  | 0  | 0  | 365 | 89  | 348 | 277 | 873  | 158 | 112 |  |  |  |  |  |  |  |
| 155.41 | 58 | 34 | 0  | 25 | 336 | 25  | 234 | 365 | 938  | 231 | 162 |  |  |  |  |  |  |  |
| 155.51 | 59 | 18 | 0  | 0  | 309 | 38  | 431 | 267 | 992  | 28  | 133 |  |  |  |  |  |  |  |
| 155.61 | 53 | 30 | 25 | 25 | 279 | 84  | 123 | 239 | 973  | 0   | 128 |  |  |  |  |  |  |  |
| 155.70 | 58 | 16 | 13 | 0  | 310 | 47  | 180 | 275 | 1003 | 12  | 138 |  |  |  |  |  |  |  |
| 155.81 | 50 | 0  | 0  | 12 | 350 | 57  | 337 | 379 | 950  | 0   | 152 |  |  |  |  |  |  |  |
| 155.91 | 79 | 10 | 0  | 4  | 354 | 68  | 247 | 420 | 880  | 50  | 119 |  |  |  |  |  |  |  |

|        |    |    |    |    |     |     |     |     |      |     |     |  |  |  |  |  |  |  |  |
|--------|----|----|----|----|-----|-----|-----|-----|------|-----|-----|--|--|--|--|--|--|--|--|
| 156.01 | 74 | 0  | 6  | 0  | 284 | 54  | 202 | 297 | 946  | 178 | 130 |  |  |  |  |  |  |  |  |
| 156.10 | 46 | 0  | 0  | 30 | 370 | 104 | 230 | 338 | 800  | 0   | 91  |  |  |  |  |  |  |  |  |
| 156.21 | 61 | 31 | 13 | 8  | 368 | 116 | 280 | 440 | 937  | 87  | 105 |  |  |  |  |  |  |  |  |
| 156.31 | 61 | 0  | 0  | 0  | 351 | 72  | 468 | 378 | 864  | 8   | 154 |  |  |  |  |  |  |  |  |
| 156.41 | 59 | 12 | 0  | 19 | 339 | 68  | 205 | 403 | 878  | 0   | 132 |  |  |  |  |  |  |  |  |
| 156.51 | 58 | 17 | 23 | 27 | 376 | 114 | 312 | 397 | 830  | 139 | 115 |  |  |  |  |  |  |  |  |
| 156.60 | 34 | 20 | 0  | 10 | 327 | 38  | 321 | 599 | 823  | 0   | 109 |  |  |  |  |  |  |  |  |
| 156.70 | 53 | 14 | 25 | 0  | 330 | 0   | 272 | 331 | 779  | 17  | 123 |  |  |  |  |  |  |  |  |
| 156.81 | 45 | 19 | 26 | 12 | 390 | 0   | 250 | 414 | 811  | 64  | 91  |  |  |  |  |  |  |  |  |
| 156.91 | 54 | 0  | 0  | 16 | 332 | 111 | 279 | 422 | 791  | 0   | 87  |  |  |  |  |  |  |  |  |
| 157.01 | 80 | 0  | 22 | 0  | 285 | 34  | 328 | 307 | 732  | 0   | 118 |  |  |  |  |  |  |  |  |
| 157.10 | 46 | 11 | 0  | 12 | 211 | 46  | 208 | 365 | 736  | 0   | 98  |  |  |  |  |  |  |  |  |
| 157.20 | 65 | 7  | 15 | 24 | 323 | 49  | 383 | 418 | 795  | 0   | 127 |  |  |  |  |  |  |  |  |
| 157.30 | 56 | 0  | 0  | 0  | 272 | 61  | 196 | 415 | 764  | 0   | 106 |  |  |  |  |  |  |  |  |
| 157.40 | 70 | 27 | 5  | 34 | 264 | 131 | 371 | 379 | 680  | 0   | 112 |  |  |  |  |  |  |  |  |
| 157.50 | 68 | 10 | 0  | 0  | 300 | 45  | 267 | 407 | 772  | 124 | 129 |  |  |  |  |  |  |  |  |
| 157.61 | 43 | 7  | 4  | 4  | 310 | 89  | 238 | 293 | 751  | 172 | 97  |  |  |  |  |  |  |  |  |
| 157.70 | 38 | 17 | 6  | 4  | 304 | 49  | 236 | 392 | 750  | 0   | 89  |  |  |  |  |  |  |  |  |
| 157.81 | 51 | 7  | 0  | 11 | 287 | 59  | 215 | 368 | 728  | 0   | 104 |  |  |  |  |  |  |  |  |
| 157.91 | 76 | 26 | 12 | 17 | 243 | 95  | 330 | 394 | 709  | 0   | 126 |  |  |  |  |  |  |  |  |
| 158.01 | 74 | 0  | 0  | 0  | 351 | 122 | 333 | 411 | 766  | 0   | 91  |  |  |  |  |  |  |  |  |
| 158.11 | 54 | 13 | 0  | 6  | 260 | 14  | 352 | 490 | 730  | 0   | 109 |  |  |  |  |  |  |  |  |
| 158.21 | 36 | 5  | 12 | 0  | 267 | 54  | 196 | 398 | 699  | 0   | 94  |  |  |  |  |  |  |  |  |
| 158.31 | 71 | 17 | 20 | 0  | 320 | 74  | 240 | 349 | 732  | 53  | 107 |  |  |  |  |  |  |  |  |
| 158.41 | 74 | 0  | 0  | 24 | 297 | 57  | 248 | 379 | 754  | 77  | 125 |  |  |  |  |  |  |  |  |
| 158.50 | 56 | 0  | 13 | 0  | 341 | 85  | 209 | 428 | 805  | 38  | 120 |  |  |  |  |  |  |  |  |
| 158.61 | 75 | 35 | 13 | 7  | 286 | 77  | 281 | 447 | 875  | 91  | 92  |  |  |  |  |  |  |  |  |
| 158.70 | 39 | 31 | 0  | 0  | 271 | 117 | 236 | 328 | 840  | 68  | 120 |  |  |  |  |  |  |  |  |
| 158.81 | 65 | 0  | 0  | 90 | 326 | 79  | 265 | 382 | 797  | 135 | 95  |  |  |  |  |  |  |  |  |
| 158.91 | 83 | 44 | 30 | 42 | 396 | 69  | 209 | 248 | 789  | 137 | 109 |  |  |  |  |  |  |  |  |
| 159.00 | 47 | 23 | 0  | 0  | 329 | 16  | 176 | 367 | 824  | 195 | 124 |  |  |  |  |  |  |  |  |
| 159.11 | 51 | 0  | 10 | 9  | 332 | 61  | 248 | 379 | 865  | 27  | 126 |  |  |  |  |  |  |  |  |
| 159.21 | 72 | 0  | 0  | 0  | 291 | 91  | 222 | 361 | 890  | 39  | 124 |  |  |  |  |  |  |  |  |
| 159.30 | 51 | 14 | 8  | 0  | 320 | 82  | 220 | 481 | 900  | 142 | 101 |  |  |  |  |  |  |  |  |
| 159.41 | 54 | 10 | 7  | 0  | 324 | 109 | 323 | 428 | 884  | 112 | 121 |  |  |  |  |  |  |  |  |
| 159.51 | 52 | 0  | 0  | 24 | 376 | 65  | 319 | 341 | 863  | 0   | 114 |  |  |  |  |  |  |  |  |
| 159.61 | 57 | 12 | 0  | 0  | 344 | 159 | 354 | 331 | 863  | 277 | 124 |  |  |  |  |  |  |  |  |
| 159.71 | 48 | 26 | 0  | 0  | 303 | 101 | 258 | 527 | 911  | 75  | 131 |  |  |  |  |  |  |  |  |
| 159.81 | 46 | 9  | 5  | 17 | 378 | 105 | 266 | 249 | 894  | 0   | 94  |  |  |  |  |  |  |  |  |
| 159.90 | 52 | 7  | 19 | 33 | 372 | 91  | 312 | 355 | 885  | 0   | 126 |  |  |  |  |  |  |  |  |
| 160.01 | 68 | 4  | 6  | 18 | 361 | 121 | 279 | 321 | 944  | 104 | 136 |  |  |  |  |  |  |  |  |
| 160.11 | 36 | 0  | 0  | 35 | 360 | 112 | 277 | 323 | 976  | 99  | 141 |  |  |  |  |  |  |  |  |
| 160.20 | 48 | 20 | 19 | 0  | 373 | 103 | 266 | 464 | 943  | 73  | 135 |  |  |  |  |  |  |  |  |
| 160.30 | 59 | 17 | 5  | 0  | 376 | 86  | 302 | 317 | 991  | 0   | 157 |  |  |  |  |  |  |  |  |
| 160.40 | 61 | 6  | 7  | 44 | 415 | 56  | 302 | 338 | 986  | 255 | 111 |  |  |  |  |  |  |  |  |
| 160.51 | 92 | 5  | 0  | 33 | 334 | 46  | 344 | 310 | 1032 | 131 | 133 |  |  |  |  |  |  |  |  |
| 160.61 | 63 | 29 | 12 | 0  | 358 | 97  | 428 | 309 | 1014 | 0   | 149 |  |  |  |  |  |  |  |  |
| 160.71 | 35 | 7  | 0  | 0  | 411 | 61  | 276 | 376 | 1019 | 45  | 136 |  |  |  |  |  |  |  |  |
| 160.81 | 37 | 16 | 7  | 0  | 380 | 90  | 286 | 353 | 1021 | 49  | 105 |  |  |  |  |  |  |  |  |
| 160.90 | 75 | 0  | 14 | 25 | 362 | 25  | 306 | 396 | 1012 | 0   | 118 |  |  |  |  |  |  |  |  |
| 161.00 | 68 | 20 | 23 | 11 | 343 | 119 | 201 | 465 | 989  | 50  | 131 |  |  |  |  |  |  |  |  |
| 161.11 | 39 | 14 | 0  | 25 | 407 | 89  | 254 | 356 | 959  | 0   | 162 |  |  |  |  |  |  |  |  |
| 161.21 | 51 | 19 | 0  | 41 | 356 | 59  | 317 | 385 | 967  | 0   | 127 |  |  |  |  |  |  |  |  |
| 161.31 | 66 | 0  | 0  | 0  | 359 | 80  | 293 | 408 | 1007 | 163 | 121 |  |  |  |  |  |  |  |  |
| 161.41 | 65 | 20 | 0  | 14 | 292 | 48  | 261 | 396 | 984  | 71  | 97  |  |  |  |  |  |  |  |  |
| 161.50 | 55 | 0  | 0  | 22 | 350 | 107 | 156 | 331 | 942  | 0   | 152 |  |  |  |  |  |  |  |  |
| 161.60 | 61 | 26 | 20 | 26 | 293 | 39  | 293 | 358 | 956  | 0   | 140 |  |  |  |  |  |  |  |  |
| 161.70 | 71 | 8  | 0  | 0  | 357 | 70  | 303 | 365 | 945  | 40  | 118 |  |  |  |  |  |  |  |  |



|       |    |    |    |    |     |     |     |     |    |     |    |  |  |  |  |  |  |  |
|-------|----|----|----|----|-----|-----|-----|-----|----|-----|----|--|--|--|--|--|--|--|
| 92.80 | 28 | 0  | 9  | 0  | 70  | 67  | 91  | 98  | 39 | 270 | 25 |  |  |  |  |  |  |  |
| 92.91 | 32 | 0  | 0  | 6  | 83  | 61  | 88  | 0   | 37 | 213 | 13 |  |  |  |  |  |  |  |
| 93.01 | 61 | 0  | 0  | 41 | 113 | 94  | 28  | 9   | 48 | 189 | 26 |  |  |  |  |  |  |  |
| 93.10 | 33 | 0  | 0  | 0  | 65  | 56  | 100 | 49  | 57 | 294 | 18 |  |  |  |  |  |  |  |
| 93.21 | 33 | 10 | 0  | 9  | 92  | 56  | 55  | 80  | 73 | 286 | 0  |  |  |  |  |  |  |  |
| 93.30 | 37 | 0  | 0  | 19 | 38  | 99  | 148 | 112 | 46 | 0   | 15 |  |  |  |  |  |  |  |
| 93.41 | 58 | 15 | 0  | 0  | 44  | 35  | 138 | 289 | 32 | 29  | 10 |  |  |  |  |  |  |  |
| 93.51 | 35 | 7  | 8  | 22 | 57  | 76  | 54  | 177 | 74 | 0   | 0  |  |  |  |  |  |  |  |
| 93.60 | 13 | 0  | 0  | 0  | 55  | 78  | 125 | 145 | 41 | 63  | 0  |  |  |  |  |  |  |  |
| 93.70 | 48 | 0  | 0  | 13 | 30  | 89  | 79  | 136 | 35 | 278 | 0  |  |  |  |  |  |  |  |
| 93.81 | 23 | 0  | 0  | 44 | 43  | 46  | 113 | 99  | 64 | 294 | 0  |  |  |  |  |  |  |  |
| 93.90 | 45 | 0  | 0  | 0  | 72  | 59  | 84  | 13  | 45 | 349 | 16 |  |  |  |  |  |  |  |
| 94.01 | 28 | 0  | 0  | 18 | 90  | 73  | 124 | 62  | 46 | 229 | 6  |  |  |  |  |  |  |  |
| 94.11 | 28 | 0  | 0  | 0  | 84  | 65  | 145 | 56  | 62 | 240 | 8  |  |  |  |  |  |  |  |
| 94.20 | 37 | 12 | 0  | 30 | 93  | 28  | 92  | 160 | 17 | 308 | 8  |  |  |  |  |  |  |  |
| 94.31 | 30 | 11 | 0  | 0  | 64  | 57  | 249 | 166 | 48 | 322 | 0  |  |  |  |  |  |  |  |
| 94.41 | 56 | 0  | 0  | 16 | 14  | 75  | 91  | 139 | 40 | 15  | 12 |  |  |  |  |  |  |  |
| 94.50 | 83 | 4  | 0  | 10 | 60  | 61  | 202 | 244 | 35 | 42  | 0  |  |  |  |  |  |  |  |
| 94.61 | 41 | 0  | 0  | 0  | 69  | 57  | 179 | 219 | 39 | 109 | 13 |  |  |  |  |  |  |  |
| 94.71 | 19 | 0  | 0  | 0  | 75  | 21  | 105 | 97  | 56 | 102 | 14 |  |  |  |  |  |  |  |
| 94.80 | 49 | 0  | 0  | 38 | 58  | 42  | 89  | 142 | 32 | 216 | 0  |  |  |  |  |  |  |  |
| 94.91 | 38 | 0  | 0  | 20 | 54  | 105 | 85  | 132 | 61 | 177 | 27 |  |  |  |  |  |  |  |
| 95.01 | 55 | 18 | 0  | 10 | 79  | 87  | 67  | 52  | 56 | 261 | 0  |  |  |  |  |  |  |  |
| 95.10 | 28 | 0  | 0  | 0  | 127 | 75  | 71  | 96  | 31 | 433 | 0  |  |  |  |  |  |  |  |
| 95.21 | 67 | 0  | 0  | 58 | 45  | 50  | 88  | 31  | 52 | 372 | 0  |  |  |  |  |  |  |  |
| 95.30 | 62 | 0  | 0  | 0  | 61  | 34  | 20  | 81  | 18 | 161 | 0  |  |  |  |  |  |  |  |
| 95.40 | 45 | 0  | 0  | 0  | 71  | 41  | 62  | 85  | 47 | 130 | 25 |  |  |  |  |  |  |  |
| 95.50 | 57 | 6  | 0  | 17 | 57  | 52  | 99  | 55  | 38 | 17  | 21 |  |  |  |  |  |  |  |
| 95.60 | 54 | 28 | 0  | 16 | 105 | 68  | 168 | 206 | 48 | 155 | 0  |  |  |  |  |  |  |  |
| 95.71 | 48 | 0  | 0  | 34 | 36  | 66  | 45  | 172 | 52 | 0   | 0  |  |  |  |  |  |  |  |
| 95.80 | 65 | 0  | 0  | 4  | 58  | 32  | 167 | 111 | 61 | 149 | 0  |  |  |  |  |  |  |  |
| 95.91 | 48 | 9  | 0  | 22 | 49  | 69  | 0   | 69  | 22 | 62  | 5  |  |  |  |  |  |  |  |
| 96.01 | 66 | 0  | 8  | 11 | 101 | 22  | 57  | 31  | 34 | 164 | 0  |  |  |  |  |  |  |  |
| 96.11 | 44 | 0  | 0  | 30 | 101 | 83  | 115 | 76  | 47 | 235 | 17 |  |  |  |  |  |  |  |
| 96.21 | 58 | 22 | 7  | 0  | 90  | 80  | 56  | 120 | 34 | 154 | 0  |  |  |  |  |  |  |  |
| 96.30 | 37 | 0  | 0  | 20 | 48  | 28  | 104 | 169 | 38 | 132 | 0  |  |  |  |  |  |  |  |
| 96.41 | 43 | 0  | 10 | 17 | 42  | 105 | 122 | 175 | 56 | 0   | 0  |  |  |  |  |  |  |  |
| 96.51 | 25 | 11 | 0  | 24 | 70  | 65  | 138 | 252 | 38 | 18  | 0  |  |  |  |  |  |  |  |
| 96.60 | 87 | 23 | 4  | 21 | 50  | 44  | 0   | 185 | 56 | 14  | 14 |  |  |  |  |  |  |  |
| 96.71 | 60 | 0  | 0  | 34 | 115 | 78  | 146 | 188 | 20 | 123 | 21 |  |  |  |  |  |  |  |
| 96.81 | 30 | 0  | 0  | 14 | 73  | 56  | 13  | 134 | 50 | 115 | 5  |  |  |  |  |  |  |  |
| 96.91 | 44 | 0  | 0  | 25 | 57  | 103 | 137 | 25  | 37 | 143 | 0  |  |  |  |  |  |  |  |
| 97.01 | 41 | 0  | 0  | 7  | 70  | 76  | 24  | 63  | 25 | 380 | 0  |  |  |  |  |  |  |  |
| 97.10 | 35 | 6  | 4  | 27 | 126 | 72  | 127 | 0   | 39 | 294 | 12 |  |  |  |  |  |  |  |
| 97.21 | 50 | 0  | 0  | 12 | 73  | 135 | 50  | 87  | 22 | 214 | 20 |  |  |  |  |  |  |  |
| 97.31 | 66 | 15 | 0  | 26 | 58  | 55  | 106 | 0   | 70 | 141 | 0  |  |  |  |  |  |  |  |
| 97.40 | 42 | 0  | 16 | 7  | 66  | 0   | 27  | 227 | 64 | 129 | 0  |  |  |  |  |  |  |  |
| 97.51 | 19 | 0  | 0  | 16 | 45  | 45  | 59  | 154 | 34 | 73  | 0  |  |  |  |  |  |  |  |
| 97.61 | 71 | 11 | 0  | 25 | 87  | 77  | 141 | 230 | 48 | 206 | 0  |  |  |  |  |  |  |  |
| 97.71 | 27 | 0  | 0  | 32 | 26  | 67  | 71  | 124 | 53 | 147 | 0  |  |  |  |  |  |  |  |
| 97.81 | 45 | 0  | 0  | 17 | 91  | 78  | 67  | 20  | 29 | 144 | 0  |  |  |  |  |  |  |  |
| 97.90 | 29 | 0  | 0  | 12 | 118 | 119 | 0   | 43  | 34 | 212 | 22 |  |  |  |  |  |  |  |
| 98.01 | 27 | 0  | 0  | 24 | 96  | 39  | 70  | 73  | 36 | 245 | 0  |  |  |  |  |  |  |  |
| 98.11 | 42 | 9  | 0  | 22 | 75  | 76  | 0   | 92  | 65 | 223 | 8  |  |  |  |  |  |  |  |
| 98.21 | 42 | 0  | 0  | 0  | 72  | 60  | 116 | 201 | 42 | 84  | 0  |  |  |  |  |  |  |  |
| 98.31 | 58 | 4  | 0  | 37 | 57  | 12  | 47  | 134 | 28 | 78  | 8  |  |  |  |  |  |  |  |
| 98.41 | 36 | 0  | 0  | 11 | 46  | 28  | 206 | 273 | 34 | 212 | 16 |  |  |  |  |  |  |  |
| 98.51 | 23 | 0  | 0  | 52 | 99  | 45  | 0   | 221 | 74 | 31  | 22 |  |  |  |  |  |  |  |

|        |    |    |    |    |     |     |     |     |    |     |    |  |  |  |  |  |  |  |
|--------|----|----|----|----|-----|-----|-----|-----|----|-----|----|--|--|--|--|--|--|--|
| 98.61  | 69 | 19 | 0  | 0  | 91  | 38  | 137 | 246 | 46 | 114 | 34 |  |  |  |  |  |  |  |
| 98.71  | 40 | 0  | 0  | 37 | 20  | 32  | 76  | 108 | 26 | 109 | 0  |  |  |  |  |  |  |  |
| 98.80  | 36 | 13 | 0  | 0  | 63  | 79  | 65  | 14  | 58 | 217 | 17 |  |  |  |  |  |  |  |
| 98.91  | 32 | 13 | 0  | 37 | 98  | 88  | 0   | 0   | 40 | 255 | 0  |  |  |  |  |  |  |  |
| 99.01  | 44 | 0  | 0  | 26 | 81  | 33  | 7   | 86  | 59 | 344 | 0  |  |  |  |  |  |  |  |
| 99.10  | 28 | 5  | 0  | 16 | 122 | 68  | 69  | 29  | 22 | 328 | 0  |  |  |  |  |  |  |  |
| 99.21  | 24 | 16 | 0  | 0  | 96  | 46  | 11  | 40  | 44 | 250 | 13 |  |  |  |  |  |  |  |
| 99.30  | 35 | 0  | 0  | 7  | 51  | 40  | 194 | 137 | 22 | 202 | 15 |  |  |  |  |  |  |  |
| 99.41  | 73 | 7  | 0  | 52 | 36  | 53  | 119 | 98  | 45 | 178 | 0  |  |  |  |  |  |  |  |
| 99.51  | 44 | 18 | 0  | 10 | 41  | 0   | 148 | 259 | 74 | 51  | 8  |  |  |  |  |  |  |  |
| 99.61  | 71 | 23 | 5  | 6  | 73  | 33  | 91  | 319 | 20 | 10  | 0  |  |  |  |  |  |  |  |
| 99.71  | 68 | 0  | 14 | 0  | 52  | 70  | 29  | 133 | 6  | 11  | 0  |  |  |  |  |  |  |  |
| 99.81  | 78 | 15 | 0  | 0  | 99  | 77  | 122 | 132 | 29 | 154 | 0  |  |  |  |  |  |  |  |
| 99.91  | 50 | 0  | 0  | 16 | 85  | 55  | 10  | 27  | 54 | 195 | 29 |  |  |  |  |  |  |  |
| 100.00 | 30 | 0  | 0  | 17 | 103 | 51  | 0   | 130 | 57 | 407 | 20 |  |  |  |  |  |  |  |
| 100.11 | 63 | 0  | 0  | 24 | 92  | 98  | 19  | 42  | 39 | 410 | 23 |  |  |  |  |  |  |  |
| 100.20 | 50 | 0  | 0  | 9  | 58  | 41  | 0   | 38  | 37 | 110 | 0  |  |  |  |  |  |  |  |
| 100.31 | 32 | 10 | 0  | 28 | 51  | 69  | 148 | 133 | 59 | 244 | 4  |  |  |  |  |  |  |  |
| 100.40 | 49 | 0  | 0  | 0  | 48  | 61  | 100 | 305 | 47 | 0   | 5  |  |  |  |  |  |  |  |
| 100.51 | 32 | 22 | 11 | 14 | 17  | 60  | 158 | 201 | 42 | 0   | 4  |  |  |  |  |  |  |  |
| 100.61 | 83 | 14 | 17 | 19 | 40  | 14  | 129 | 236 | 31 | 57  | 11 |  |  |  |  |  |  |  |
| 100.70 | 58 | 6  | 10 | 0  | 40  | 50  | 146 | 155 | 37 | 16  | 0  |  |  |  |  |  |  |  |
| 100.81 | 25 | 0  | 0  | 9  | 92  | 92  | 109 | 137 | 49 | 142 | 22 |  |  |  |  |  |  |  |
| 100.90 | 46 | 0  | 0  | 13 | 44  | 79  | 13  | 0   | 46 | 320 | 14 |  |  |  |  |  |  |  |
| 101.01 | 29 | 0  | 0  | 0  | 94  | 82  | 16  | 18  | 32 | 295 | 15 |  |  |  |  |  |  |  |
| 101.11 | 48 | 0  | 0  | 0  | 100 | 39  | 36  | 0   | 39 | 411 | 23 |  |  |  |  |  |  |  |
| 101.20 | 39 | 0  | 4  | 13 | 40  | 7   | 56  | 53  | 23 | 194 | 0  |  |  |  |  |  |  |  |
| 101.31 | 38 | 0  | 0  | 29 | 25  | 24  | 56  | 85  | 18 | 28  | 0  |  |  |  |  |  |  |  |
| 101.40 | 35 | 0  | 0  | 0  | 106 | 13  | 68  | 233 | 31 | 140 | 5  |  |  |  |  |  |  |  |
| 101.50 | 48 | 44 | 0  | 0  | 35  | 22  | 237 | 123 | 53 | 123 | 12 |  |  |  |  |  |  |  |
| 101.61 | 62 | 24 | 13 | 0  | 65  | 17  | 37  | 226 | 42 | 179 | 7  |  |  |  |  |  |  |  |
| 101.71 | 63 | 11 | 0  | 0  | 54  | 74  | 0   | 133 | 43 | 131 | 0  |  |  |  |  |  |  |  |
| 101.80 | 46 | 0  | 0  | 16 | 89  | 43  | 99  | 168 | 24 | 163 | 5  |  |  |  |  |  |  |  |
| 101.90 | 54 | 0  | 0  | 13 | 83  | 64  | 83  | 104 | 40 | 284 | 19 |  |  |  |  |  |  |  |
| 102.01 | 38 | 0  | 0  | 10 | 66  | 67  | 59  | 54  | 28 | 349 | 16 |  |  |  |  |  |  |  |
| 102.10 | 50 | 0  | 0  | 0  | 67  | 40  | 70  | 0   | 18 | 274 | 6  |  |  |  |  |  |  |  |
| 102.20 | 38 | 6  | 0  | 27 | 50  | 61  | 39  | 83  | 72 | 189 | 11 |  |  |  |  |  |  |  |
| 102.31 | 28 | 0  | 0  | 33 | 51  | 92  | 158 | 116 | 26 | 137 | 0  |  |  |  |  |  |  |  |
| 102.41 | 55 | 8  | 0  | 41 | 12  | 40  | 139 | 208 | 27 | 146 | 17 |  |  |  |  |  |  |  |
| 102.50 | 37 | 12 | 0  | 0  | 40  | 63  | 81  | 148 | 23 | 0   | 0  |  |  |  |  |  |  |  |
| 102.61 | 45 | 0  | 0  | 0  | 78  | 46  | 116 | 0   | 35 | 184 | 0  |  |  |  |  |  |  |  |
| 102.70 | 47 | 0  | 0  | 47 | 75  | 89  | 101 | 62  | 61 | 145 | 14 |  |  |  |  |  |  |  |
| 102.81 | 70 | 0  | 0  | 45 | 47  | 188 | 110 | 40  | 29 | 274 | 10 |  |  |  |  |  |  |  |
| 102.91 | 54 | 0  | 0  | 32 | 76  | 150 | 0   | 44  | 47 | 281 | 0  |  |  |  |  |  |  |  |
| 103.01 | 66 | 0  | 0  | 23 | 93  | 105 | 73  | 70  | 40 | 84  | 0  |  |  |  |  |  |  |  |
| 103.11 | 0  | 0  | 0  | 15 | 65  | 94  | 36  | 92  | 22 | 282 | 11 |  |  |  |  |  |  |  |
| 103.21 | 50 | 0  | 0  | 18 | 64  | 86  | 37  | 23  | 36 | 247 | 34 |  |  |  |  |  |  |  |
| 103.31 | 49 | 0  | 0  | 10 | 58  | 0   | 87  | 160 | 22 | 0   | 0  |  |  |  |  |  |  |  |
| 103.41 | 49 | 0  | 0  | 16 | 28  | 66  | 50  | 191 | 42 | 131 | 0  |  |  |  |  |  |  |  |
| 103.50 | 36 | 15 | 0  | 21 | 40  | 17  | 127 | 261 | 33 | 132 | 0  |  |  |  |  |  |  |  |
| 103.60 | 22 | 19 | 0  | 31 | 91  | 72  | 132 | 62  | 35 | 204 | 21 |  |  |  |  |  |  |  |
| 103.71 | 85 | 0  | 0  | 40 | 105 | 55  | 0   | 86  | 32 | 362 | 0  |  |  |  |  |  |  |  |
| 103.80 | 26 | 0  | 0  | 40 | 45  | 67  | 5   | 71  | 58 | 485 | 0  |  |  |  |  |  |  |  |
| 103.91 | 39 | 0  | 0  | 0  | 89  | 109 | 140 | 30  | 44 | 381 | 0  |  |  |  |  |  |  |  |
| 104.01 | 54 | 0  | 0  | 36 | 92  | 36  | 68  | 171 | 47 | 126 | 20 |  |  |  |  |  |  |  |
| 104.11 | 28 | 0  | 0  | 13 | 80  | 91  | 186 | 189 | 34 | 62  | 12 |  |  |  |  |  |  |  |
| 104.20 | 47 | 12 | 0  | 0  | 6   | 64  | 55  | 89  | 27 | 254 | 0  |  |  |  |  |  |  |  |
| 104.31 | 44 | 0  | 0  | 30 | 63  | 56  | 111 | 69  | 24 | 19  | 8  |  |  |  |  |  |  |  |

|        |    |    |    |    |     |     |     |     |    |     |    |  |  |  |  |  |  |  |
|--------|----|----|----|----|-----|-----|-----|-----|----|-----|----|--|--|--|--|--|--|--|
| 104.41 | 7  | 0  | 0  | 20 | 79  | 94  | 0   | 0   | 43 | 187 | 0  |  |  |  |  |  |  |  |
| 104.51 | 30 | 0  | 0  | 0  | 63  | 92  | 89  | 95  | 20 | 238 | 0  |  |  |  |  |  |  |  |
| 104.61 | 45 | 0  | 0  | 0  | 91  | 81  | 144 | 99  | 45 | 377 | 0  |  |  |  |  |  |  |  |
| 104.71 | 30 | 0  | 0  | 19 | 59  | 55  | 73  | 108 | 41 | 223 | 15 |  |  |  |  |  |  |  |
| 104.80 | 40 | 0  | 0  | 19 | 111 | 66  | 86  | 81  | 58 | 163 | 11 |  |  |  |  |  |  |  |
| 104.91 | 60 | 32 | 0  | 0  | 88  | 66  | 169 | 266 | 41 | 48  | 21 |  |  |  |  |  |  |  |
| 105.01 | 54 | 11 | 0  | 0  | 49  | 35  | 151 | 183 | 32 | 0   | 0  |  |  |  |  |  |  |  |
| 105.11 | 66 | 12 | 0  | 10 | 67  | 15  | 93  | 150 | 48 | 0   | 20 |  |  |  |  |  |  |  |
| 105.21 | 39 | 0  | 4  | 22 | 60  | 12  | 184 | 148 | 45 | 0   | 20 |  |  |  |  |  |  |  |
| 105.31 | 18 | 0  | 0  | 0  | 71  | 72  | 84  | 141 | 45 | 41  | 0  |  |  |  |  |  |  |  |
| 105.41 | 37 | 0  | 0  | 0  | 109 | 34  | 8   | 207 | 44 | 247 | 9  |  |  |  |  |  |  |  |
| 105.51 | 24 | 0  | 0  | 16 | 69  | 83  | 0   | 0   | 29 | 332 | 0  |  |  |  |  |  |  |  |
| 105.61 | 37 | 0  | 0  | 12 | 62  | 62  | 25  | 103 | 26 | 287 | 12 |  |  |  |  |  |  |  |
| 105.71 | 19 | 0  | 0  | 0  | 63  | 39  | 85  | 47  | 51 | 374 | 0  |  |  |  |  |  |  |  |
| 105.81 | 55 | 0  | 0  | 22 | 61  | 90  | 113 | 0   | 33 | 200 | 10 |  |  |  |  |  |  |  |
| 105.91 | 37 | 0  | 0  | 16 | 44  | 70  | 171 | 59  | 51 | 173 | 13 |  |  |  |  |  |  |  |
| 106.01 | 42 | 13 | 13 | 51 | 44  | 31  | 148 | 274 | 64 | 12  | 9  |  |  |  |  |  |  |  |
| 106.10 | 41 | 5  | 6  | 0  | 78  | 15  | 9   | 249 | 36 | 29  | 0  |  |  |  |  |  |  |  |
| 106.21 | 31 | 6  | 0  | 0  | 55  | 45  | 126 | 66  | 29 | 325 | 18 |  |  |  |  |  |  |  |
| 106.31 | 41 | 0  | 0  | 27 | 105 | 90  | 19  | 0   | 63 | 309 | 12 |  |  |  |  |  |  |  |
| 106.40 | 49 | 0  | 0  | 39 | 101 | 74  | 72  | 0   | 54 | 298 | 19 |  |  |  |  |  |  |  |
| 106.51 | 34 | 0  | 0  | 0  | 64  | 114 | 40  | 0   | 46 | 156 | 5  |  |  |  |  |  |  |  |
| 106.61 | 58 | 4  | 10 | 0  | 47  | 125 | 99  | 139 | 39 | 212 | 0  |  |  |  |  |  |  |  |
| 106.71 | 46 | 0  | 0  | 6  | 114 | 0   | 127 | 117 | 50 | 106 | 15 |  |  |  |  |  |  |  |
| 106.81 | 28 | 0  | 0  | 27 | 19  | 30  | 37  | 45  | 41 | 212 | 23 |  |  |  |  |  |  |  |
| 106.91 | 40 | 0  | 0  | 40 | 88  | 50  | 62  | 88  | 46 | 287 | 0  |  |  |  |  |  |  |  |
| 107.01 | 30 | 0  | 0  | 0  | 77  | 66  | 64  | 29  | 45 | 300 | 6  |  |  |  |  |  |  |  |
| 107.11 | 57 | 10 | 0  | 16 | 91  | 81  | 59  | 60  | 72 | 393 | 12 |  |  |  |  |  |  |  |
| 107.21 | 32 | 0  | 0  | 46 | 67  | 45  | 0   | 172 | 46 | 214 | 22 |  |  |  |  |  |  |  |
| 107.31 | 25 | 24 | 0  | 0  | 77  | 0   | 0   | 141 | 44 | 164 | 12 |  |  |  |  |  |  |  |
| 107.41 | 49 | 0  | 0  | 0  | 55  | 45  | 106 | 116 | 25 | 120 | 0  |  |  |  |  |  |  |  |
| 107.50 | 40 | 0  | 0  | 42 | 108 | 52  | 34  | 33  | 18 | 232 | 0  |  |  |  |  |  |  |  |
| 107.61 | 30 | 0  | 0  | 13 | 98  | 45  | 212 | 159 | 47 | 129 | 17 |  |  |  |  |  |  |  |
| 107.71 | 50 | 19 | 0  | 19 | 97  | 28  | 10  | 178 | 9  | 105 | 0  |  |  |  |  |  |  |  |
| 107.80 | 47 | 0  | 0  | 17 | 75  | 73  | 83  | 128 | 18 | 249 | 9  |  |  |  |  |  |  |  |
| 107.91 | 42 | 0  | 0  | 0  | 94  | 44  | 36  | 37  | 37 | 357 | 19 |  |  |  |  |  |  |  |
| 108.01 | 43 | 0  | 0  | 7  | 63  | 101 | 17  | 31  | 54 | 183 | 0  |  |  |  |  |  |  |  |
| 108.10 | 28 | 0  | 0  | 26 | 108 | 115 | 21  | 56  | 42 | 247 | 8  |  |  |  |  |  |  |  |
| 108.21 | 47 | 0  | 0  | 11 | 57  | 62  | 96  | 20  | 44 | 233 | 13 |  |  |  |  |  |  |  |
| 108.30 | 39 | 0  | 0  | 5  | 74  | 94  | 25  | 111 | 56 | 212 | 12 |  |  |  |  |  |  |  |
| 108.41 | 38 | 0  | 0  | 0  | 75  | 47  | 0   | 132 | 45 | 332 | 31 |  |  |  |  |  |  |  |
| 108.51 | 59 | 0  | 0  | 41 | 53  | 56  | 53  | 149 | 46 | 99  | 0  |  |  |  |  |  |  |  |
| 108.60 | 66 | 32 | 11 | 10 | 33  | 0   | 109 | 172 | 32 | 0   | 0  |  |  |  |  |  |  |  |
| 108.71 | 37 | 7  | 0  | 15 | 79  | 0   | 68  | 184 | 66 | 0   | 7  |  |  |  |  |  |  |  |
| 108.80 | 40 | 0  | 0  | 36 | 61  | 37  | 123 | 115 | 43 | 0   | 5  |  |  |  |  |  |  |  |
| 108.91 | 38 | 0  | 0  | 22 | 20  | 70  | 85  | 137 | 58 | 92  | 0  |  |  |  |  |  |  |  |
| 109.01 | 56 | 15 | 0  | 33 | 74  | 67  | 109 | 143 | 28 | 160 | 0  |  |  |  |  |  |  |  |
| 109.11 | 57 | 0  | 0  | 24 | 81  | 64  | 82  | 62  | 30 | 366 | 0  |  |  |  |  |  |  |  |
| 109.20 | 33 | 0  | 0  | 5  | 25  | 52  | 42  | 39  | 33 | 267 | 0  |  |  |  |  |  |  |  |
| 109.31 | 36 | 0  | 0  | 0  | 77  | 57  | 153 | 84  | 42 | 422 | 0  |  |  |  |  |  |  |  |
| 109.41 | 29 | 0  | 0  | 11 | 75  | 72  | 0   | 64  | 52 | 224 | 16 |  |  |  |  |  |  |  |
| 109.51 | 43 | 8  | 0  | 0  | 97  | 78  | 93  | 5   | 57 | 237 | 12 |  |  |  |  |  |  |  |
| 109.60 | 30 | 0  | 0  | 16 | 81  | 90  | 65  | 118 | 74 | 216 | 13 |  |  |  |  |  |  |  |
| 109.71 | 29 | 0  | 0  | 17 | 115 | 77  | 0   | 0   | 41 | 436 | 15 |  |  |  |  |  |  |  |
| 109.81 | 37 | 0  | 0  | 8  | 72  | 57  | 137 | 168 | 67 | 423 | 4  |  |  |  |  |  |  |  |
| 109.91 | 26 | 0  | 0  | 0  | 101 | 28  | 101 | 227 | 64 | 79  | 22 |  |  |  |  |  |  |  |
| 110.01 | 6  | 0  | 0  | 0  | 49  | 18  | 119 | 137 | 34 | 22  | 14 |  |  |  |  |  |  |  |
| 110.10 | 46 | 0  | 0  | 0  | 82  | 68  | 94  | 150 | 35 | 157 | 0  |  |  |  |  |  |  |  |

|        |     |    |    |    |     |     |     |     |     |     |    |  |  |  |  |  |  |  |
|--------|-----|----|----|----|-----|-----|-----|-----|-----|-----|----|--|--|--|--|--|--|--|
| 110.21 | 17  | 0  | 0  | 27 | 92  | 33  | 6   | 116 | 52  | 265 | 14 |  |  |  |  |  |  |  |
| 110.31 | 54  | 0  | 0  | 30 | 81  | 101 | 45  | 65  | 50  | 318 | 0  |  |  |  |  |  |  |  |
| 110.41 | 24  | 7  | 0  | 0  | 81  | 57  | 10  | 110 | 47  | 321 | 0  |  |  |  |  |  |  |  |
| 110.51 | 67  | 0  | 0  | 0  | 79  | 0   | 125 | 66  | 63  | 124 | 0  |  |  |  |  |  |  |  |
| 110.60 | 40  | 0  | 0  | 32 | 84  | 62  | 46  | 93  | 52  | 350 | 10 |  |  |  |  |  |  |  |
| 110.71 | 37  | 7  | 0  | 27 | 80  | 55  | 133 | 17  | 36  | 414 | 16 |  |  |  |  |  |  |  |
| 110.81 | 28  | 0  | 0  | 0  | 31  | 102 | 87  | 80  | 62  | 376 | 12 |  |  |  |  |  |  |  |
| 110.91 | 71  | 5  | 10 | 7  | 71  | 45  | 98  | 177 | 102 | 161 | 7  |  |  |  |  |  |  |  |
| 111.00 | 52  | 12 | 4  | 0  | 105 | 42  | 220 | 307 | 97  | 29  | 0  |  |  |  |  |  |  |  |
| 111.10 | 49  | 15 | 4  | 8  | 50  | 36  | 105 | 257 | 54  | 0   | 0  |  |  |  |  |  |  |  |
| 111.21 | 52  | 0  | 0  | 12 | 58  | 85  | 159 | 232 | 49  | 222 | 18 |  |  |  |  |  |  |  |
| 111.30 | 58  | 0  | 0  | 0  | 102 | 11  | 136 | 268 | 44  | 0   | 14 |  |  |  |  |  |  |  |
| 111.41 | 56  | 0  | 0  | 18 | 110 | 64  | 29  | 83  | 69  | 193 | 14 |  |  |  |  |  |  |  |
| 111.50 | 50  | 0  | 0  | 17 | 88  | 66  | 0   | 96  | 23  | 174 | 37 |  |  |  |  |  |  |  |
| 111.61 | 44  | 9  | 0  | 0  | 92  | 111 | 79  | 91  | 64  | 343 | 9  |  |  |  |  |  |  |  |
| 111.71 | 30  | 0  | 0  | 8  | 79  | 93  | 119 | 0   | 72  | 186 | 0  |  |  |  |  |  |  |  |
| 111.81 | 54  | 7  | 0  | 18 | 70  | 65  | 72  | 127 | 32  | 339 | 0  |  |  |  |  |  |  |  |
| 111.91 | 34  | 0  | 0  | 30 | 77  | 75  | 45  | 96  | 38  | 172 | 0  |  |  |  |  |  |  |  |
| 112.01 | 20  | 23 | 0  | 29 | 63  | 100 | 102 | 139 | 61  | 407 | 18 |  |  |  |  |  |  |  |
| 112.11 | 70  | 0  | 0  | 5  | 51  | 4   | 47  | 148 | 37  | 44  | 31 |  |  |  |  |  |  |  |
| 112.21 | 32  | 0  | 11 | 0  | 47  | 52  | 147 | 202 | 67  | 0   | 30 |  |  |  |  |  |  |  |
| 112.31 | 80  | 15 | 0  | 15 | 86  | 55  | 147 | 80  | 64  | 163 | 32 |  |  |  |  |  |  |  |
| 112.41 | 66  | 0  | 0  | 19 | 103 | 118 | 27  | 104 | 48  | 191 | 15 |  |  |  |  |  |  |  |
| 112.51 | 53  | 0  | 0  | 27 | 74  | 107 | 115 | 99  | 64  | 222 | 0  |  |  |  |  |  |  |  |
| 112.61 | 20  | 11 | 0  | 0  | 42  | 98  | 0   | 49  | 64  | 395 | 9  |  |  |  |  |  |  |  |
| 112.70 | 28  | 0  | 0  | 0  | 37  | 112 | 78  | 0   | 61  | 181 | 23 |  |  |  |  |  |  |  |
| 112.81 | 44  | 0  | 0  | 12 | 109 | 89  | 169 | 19  | 40  | 258 | 0  |  |  |  |  |  |  |  |
| 112.91 | 21  | 0  | 0  | 0  | 76  | 146 | 31  | 75  | 60  | 476 | 26 |  |  |  |  |  |  |  |
| 113.01 | 27  | 5  | 0  | 31 | 66  | 60  | 149 | 102 | 57  | 320 | 0  |  |  |  |  |  |  |  |
| 113.11 | 57  | 0  | 0  | 30 | 42  | 70  | 88  | 192 | 72  | 212 | 5  |  |  |  |  |  |  |  |
| 113.20 | 46  | 16 | 7  | 40 | 49  | 10  | 56  | 275 | 48  | 0   | 0  |  |  |  |  |  |  |  |
| 113.30 | 57  | 26 | 0  | 0  | 69  | 18  | 0   | 274 | 49  | 0   | 0  |  |  |  |  |  |  |  |
| 113.41 | 30  | 0  | 0  | 8  | 119 | 38  | 78  | 158 | 54  | 71  | 15 |  |  |  |  |  |  |  |
| 113.50 | 51  | 0  | 0  | 25 | 83  | 73  | 0   | 142 | 32  | 133 | 0  |  |  |  |  |  |  |  |
| 113.61 | 64  | 14 | 0  | 0  | 90  | 0   | 0   | 98  | 24  | 204 | 9  |  |  |  |  |  |  |  |
| 113.71 | 21  | 0  | 0  | 52 | 101 | 96  | 21  | 81  | 41  | 126 | 0  |  |  |  |  |  |  |  |
| 113.81 | 32  | 0  | 0  | 0  | 107 | 132 | 4   | 95  | 59  | 387 | 8  |  |  |  |  |  |  |  |
| 113.90 | 14  | 0  | 0  | 34 | 60  | 111 | 12  | 169 | 50  | 291 | 0  |  |  |  |  |  |  |  |
| 114.01 | 13  | 0  | 0  | 0  | 125 | 108 | 67  | 0   | 40  | 188 | 16 |  |  |  |  |  |  |  |
| 114.11 | 51  | 0  | 0  | 0  | 57  | 80  | 103 | 89  | 31  | 232 | 18 |  |  |  |  |  |  |  |
| 114.20 | 52  | 0  | 0  | 0  | 95  | 105 | 176 | 143 | 50  | 462 | 0  |  |  |  |  |  |  |  |
| 114.31 | 31  | 0  | 0  | 28 | 105 | 20  | 119 | 60  | 60  | 443 | 0  |  |  |  |  |  |  |  |
| 114.40 | 41  | 0  | 0  | 56 | 65  | 92  | 56  | 97  | 29  | 315 | 0  |  |  |  |  |  |  |  |
| 114.51 | 69  | 32 | 5  | 49 | 74  | 15  | 117 | 138 | 76  | 143 | 13 |  |  |  |  |  |  |  |
| 114.60 | 38  | 0  | 0  | 0  | 39  | 56  | 166 | 146 | 77  | 0   | 14 |  |  |  |  |  |  |  |
| 114.70 | 44  | 9  | 0  | 0  | 95  | 36  | 136 | 111 | 50  | 53  | 8  |  |  |  |  |  |  |  |
| 114.80 | 55  | 0  | 0  | 0  | 71  | 0   | 120 | 128 | 47  | 126 | 22 |  |  |  |  |  |  |  |
| 114.91 | 26  | 6  | 0  | 56 | 86  | 86  | 79  | 46  | 30  | 126 | 18 |  |  |  |  |  |  |  |
| 115.00 | 107 | 0  | 0  | 0  | 71  | 63  | 133 | 5   | 49  | 142 | 16 |  |  |  |  |  |  |  |
| 115.11 | 29  | 0  | 0  | 7  | 110 | 74  | 0   | 91  | 32  | 236 | 22 |  |  |  |  |  |  |  |
| 115.21 | 55  | 0  | 0  | 9  | 87  | 80  | 69  | 56  | 37  | 250 | 0  |  |  |  |  |  |  |  |
| 115.31 | 48  | 0  | 0  | 32 | 82  | 98  | 41  | 59  | 51  | 449 | 26 |  |  |  |  |  |  |  |
| 115.40 | 25  | 0  | 0  | 0  | 70  | 103 | 102 | 76  | 49  | 285 | 12 |  |  |  |  |  |  |  |
| 115.50 | 48  | 0  | 8  | 12 | 84  | 79  | 159 | 132 | 51  | 334 | 32 |  |  |  |  |  |  |  |
| 115.61 | 24  | 11 | 0  | 11 | 20  | 84  | 0   | 137 | 43  | 292 | 10 |  |  |  |  |  |  |  |
| 115.71 | 50  | 0  | 0  | 30 | 87  | 46  | 10  | 161 | 62  | 172 | 45 |  |  |  |  |  |  |  |
| 115.81 | 52  | 10 | 0  | 28 | 80  | 45  | 92  | 216 | 64  | 0   | 15 |  |  |  |  |  |  |  |
| 115.91 | 53  | 0  | 0  | 31 | 61  | 61  | 142 | 232 | 51  | 33  | 20 |  |  |  |  |  |  |  |

|        |    |    |    |    |     |     |     |     |    |     |    |  |  |  |  |  |  |  |
|--------|----|----|----|----|-----|-----|-----|-----|----|-----|----|--|--|--|--|--|--|--|
| 116.01 | 60 | 20 | 0  | 5  | 82  | 91  | 215 | 338 | 50 | 164 | 13 |  |  |  |  |  |  |  |
| 116.11 | 28 | 15 | 0  | 12 | 52  | 15  | 91  | 175 | 77 | 0   | 18 |  |  |  |  |  |  |  |
| 116.21 | 50 | 4  | 17 | 7  | 41  | 26  | 0   | 73  | 39 | 13  | 15 |  |  |  |  |  |  |  |
| 116.31 | 44 | 0  | 0  | 0  | 71  | 0   | 79  | 149 | 43 | 218 | 17 |  |  |  |  |  |  |  |
| 116.40 | 42 | 0  | 0  | 37 | 55  | 32  | 55  | 0   | 53 | 149 | 0  |  |  |  |  |  |  |  |
| 116.51 | 21 | 0  | 0  | 16 | 91  | 79  | 27  | 70  | 62 | 284 | 20 |  |  |  |  |  |  |  |
| 116.60 | 35 | 0  | 0  | 11 | 74  | 111 | 121 | 21  | 47 | 431 | 10 |  |  |  |  |  |  |  |
| 116.71 | 25 | 0  | 0  | 0  | 52  | 66  | 21  | 152 | 63 | 348 | 9  |  |  |  |  |  |  |  |
| 116.81 | 23 | 0  | 0  | 26 | 97  | 76  | 40  | 0   | 38 | 378 | 10 |  |  |  |  |  |  |  |
| 116.91 | 51 | 0  | 13 | 0  | 95  | 58  | 80  | 73  | 26 | 268 | 0  |  |  |  |  |  |  |  |
| 117.01 | 23 | 0  | 0  | 33 | 57  | 92  | 95  | 36  | 53 | 254 | 0  |  |  |  |  |  |  |  |
| 117.10 | 56 | 0  | 0  | 21 | 58  | 45  | 106 | 0   | 46 | 282 | 20 |  |  |  |  |  |  |  |
| 117.20 | 37 | 0  | 0  | 31 | 116 | 48  | 63  | 36  | 48 | 213 | 0  |  |  |  |  |  |  |  |
| 117.31 | 50 | 0  | 0  | 36 | 96  | 17  | 158 | 20  | 36 | 355 | 19 |  |  |  |  |  |  |  |
| 117.41 | 15 | 0  | 0  | 18 | 126 | 75  | 83  | 39  | 61 | 361 | 14 |  |  |  |  |  |  |  |
| 117.51 | 49 | 0  | 0  | 0  | 121 | 75  | 37  | 35  | 44 | 194 | 11 |  |  |  |  |  |  |  |
| 117.61 | 36 | 0  | 4  | 16 | 59  | 93  | 52  | 35  | 52 | 260 | 35 |  |  |  |  |  |  |  |
| 117.71 | 8  | 0  | 0  | 14 | 106 | 85  | 51  | 23  | 51 | 302 | 27 |  |  |  |  |  |  |  |
| 117.81 | 50 | 0  | 0  | 29 | 55  | 28  | 143 | 150 | 15 | 22  | 19 |  |  |  |  |  |  |  |
| 117.90 | 83 | 10 | 18 | 18 | 44  | 13  | 97  | 214 | 66 | 92  | 0  |  |  |  |  |  |  |  |
| 118.00 | 61 | 20 | 0  | 0  | 38  | 41  | 139 | 185 | 66 | 0   | 21 |  |  |  |  |  |  |  |
| 118.11 | 51 | 0  | 0  | 0  | 18  | 43  | 93  | 152 | 54 | 0   | 0  |  |  |  |  |  |  |  |
| 118.21 | 50 | 0  | 10 | 15 | 69  | 41  | 98  | 131 | 56 | 0   | 0  |  |  |  |  |  |  |  |
| 118.31 | 50 | 28 | 0  | 6  | 91  | 46  | 115 | 256 | 7  | 110 | 11 |  |  |  |  |  |  |  |
| 118.40 | 68 | 12 | 16 | 17 | 47  | 22  | 180 | 153 | 45 | 141 | 0  |  |  |  |  |  |  |  |
| 118.51 | 17 | 6  | 0  | 0  | 68  | 44  | 48  | 101 | 36 | 246 | 7  |  |  |  |  |  |  |  |
| 118.61 | 31 | 0  | 0  | 0  | 110 | 83  | 94  | 91  | 56 | 140 | 12 |  |  |  |  |  |  |  |
| 118.70 | 54 | 0  | 0  | 18 | 127 | 98  | 111 | 69  | 64 | 293 | 13 |  |  |  |  |  |  |  |
| 118.80 | 26 | 0  | 0  | 0  | 51  | 62  | 75  | 25  | 53 | 262 | 0  |  |  |  |  |  |  |  |
| 118.91 | 62 | 0  | 0  | 0  | 81  | 65  | 59  | 103 | 71 | 413 | 18 |  |  |  |  |  |  |  |
| 119.01 | 54 | 10 | 0  | 26 | 77  | 102 | 99  | 0   | 42 | 269 | 20 |  |  |  |  |  |  |  |
| 119.10 | 61 | 0  | 0  | 18 | 102 | 60  | 81  | 52  | 44 | 330 | 15 |  |  |  |  |  |  |  |
| 119.21 | 16 | 0  | 0  | 0  | 114 | 94  | 119 | 120 | 67 | 402 | 18 |  |  |  |  |  |  |  |
| 119.31 | 45 | 0  | 0  | 0  | 76  | 79  | 88  | 47  | 22 | 163 | 0  |  |  |  |  |  |  |  |
| 119.41 | 31 | 0  | 0  | 22 | 101 | 102 | 177 | 95  | 53 | 274 | 7  |  |  |  |  |  |  |  |
| 119.51 | 57 | 0  | 0  | 7  | 75  | 32  | 58  | 122 | 56 | 296 | 0  |  |  |  |  |  |  |  |
| 119.61 | 23 | 0  | 0  | 33 | 67  | 41  | 64  | 73  | 54 | 260 | 0  |  |  |  |  |  |  |  |
| 119.71 | 41 | 17 | 0  | 0  | 113 | 25  | 35  | 0   | 58 | 304 | 0  |  |  |  |  |  |  |  |
| 119.80 | 39 | 0  | 0  | 41 | 80  | 74  | 238 | 48  | 43 | 413 | 10 |  |  |  |  |  |  |  |
| 119.91 | 42 | 0  | 8  | 36 | 59  | 41  | 119 | 162 | 76 | 239 | 0  |  |  |  |  |  |  |  |
| 120.00 | 71 | 0  | 7  | 15 | 55  | 11  | 175 | 171 | 88 | 0   | 6  |  |  |  |  |  |  |  |
| 120.11 | 15 | 7  | 0  | 52 | 58  | 50  | 141 | 149 | 52 | 0   | 16 |  |  |  |  |  |  |  |
| 120.20 | 57 | 6  | 0  | 0  | 31  | 36  | 65  | 188 | 64 | 102 | 36 |  |  |  |  |  |  |  |
| 120.31 | 40 | 17 | 0  | 29 | 86  | 80  | 159 | 86  | 51 | 333 | 5  |  |  |  |  |  |  |  |
| 120.40 | 27 | 0  | 0  | 30 | 81  | 49  | 51  | 11  | 72 | 225 | 10 |  |  |  |  |  |  |  |
| 120.51 | 50 | 13 | 0  | 7  | 75  | 57  | 66  | 86  | 33 | 305 | 13 |  |  |  |  |  |  |  |
| 120.61 | 16 | 0  | 0  | 6  | 71  | 123 | 121 | 132 | 50 | 251 | 0  |  |  |  |  |  |  |  |
| 120.70 | 39 | 0  | 0  | 22 | 78  | 91  | 36  | 0   | 50 | 312 | 0  |  |  |  |  |  |  |  |
| 120.81 | 40 | 0  | 0  | 16 | 125 | 9   | 33  | 35  | 74 | 348 | 39 |  |  |  |  |  |  |  |
| 120.91 | 7  | 0  | 0  | 0  | 72  | 44  | 124 | 114 | 78 | 273 | 13 |  |  |  |  |  |  |  |
| 121.01 | 42 | 8  | 0  | 21 | 110 | 110 | 0   | 190 | 76 | 131 | 0  |  |  |  |  |  |  |  |
| 121.11 | 33 | 0  | 0  | 21 | 76  | 16  | 83  | 137 | 96 | 106 | 5  |  |  |  |  |  |  |  |
| 121.21 | 51 | 0  | 0  | 0  | 28  | 76  | 103 | 143 | 71 | 0   | 0  |  |  |  |  |  |  |  |
| 121.31 | 45 | 10 | 23 | 0  | 73  | 29  | 168 | 228 | 72 | 51  | 0  |  |  |  |  |  |  |  |
| 121.41 | 57 | 0  | 0  | 50 | 74  | 75  | 140 | 111 | 72 | 5   | 13 |  |  |  |  |  |  |  |
| 121.50 | 49 | 0  | 0  | 15 | 51  | 77  | 55  | 287 | 56 | 147 | 26 |  |  |  |  |  |  |  |
| 121.60 | 37 | 0  | 0  | 6  | 89  | 94  | 68  | 99  | 48 | 140 | 10 |  |  |  |  |  |  |  |
| 121.70 | 42 | 0  | 12 | 9  | 62  | 50  | 116 | 147 | 58 | 209 | 0  |  |  |  |  |  |  |  |

|        |    |    |    |    |     |     |     |     |    |     |    |  |  |  |  |  |  |  |
|--------|----|----|----|----|-----|-----|-----|-----|----|-----|----|--|--|--|--|--|--|--|
| 121.80 | 73 | 0  | 0  | 0  | 92  | 74  | 0   | 13  | 64 | 171 | 0  |  |  |  |  |  |  |  |
| 121.90 | 36 | 0  | 0  | 0  | 78  | 37  | 99  | 68  | 78 | 180 | 0  |  |  |  |  |  |  |  |
| 122.01 | 32 | 0  | 0  | 0  | 111 | 112 | 42  | 23  | 50 | 0   | 0  |  |  |  |  |  |  |  |
| 122.10 | 65 | 0  | 0  | 17 | 83  | 77  | 181 | 106 | 59 | 271 | 19 |  |  |  |  |  |  |  |
| 122.21 | 45 | 0  | 0  | 11 | 85  | 66  | 189 | 78  | 51 | 400 | 0  |  |  |  |  |  |  |  |
| 122.31 | 50 | 0  | 0  | 46 | 88  | 15  | 53  | 109 | 64 | 323 | 0  |  |  |  |  |  |  |  |
| 122.40 | 41 | 0  | 0  | 7  | 93  | 54  | 0   | 120 | 74 | 146 | 14 |  |  |  |  |  |  |  |
| 122.50 | 30 | 0  | 0  | 0  | 81  | 81  | 54  | 112 | 63 | 314 | 20 |  |  |  |  |  |  |  |
| 122.61 | 37 | 0  | 0  | 40 | 60  | 87  | 73  | 120 | 32 | 227 | 17 |  |  |  |  |  |  |  |
| 122.71 | 56 | 0  | 0  | 0  | 67  | 51  | 21  | 154 | 36 | 148 | 12 |  |  |  |  |  |  |  |
| 122.81 | 38 | 0  | 0  | 40 | 71  | 79  | 105 | 200 | 74 | 440 | 6  |  |  |  |  |  |  |  |
| 122.91 | 36 | 0  | 0  | 18 | 121 | 109 | 100 | 71  | 43 | 384 | 7  |  |  |  |  |  |  |  |
| 123.01 | 56 | 0  | 0  | 20 | 113 | 59  | 97  | 96  | 63 | 227 | 9  |  |  |  |  |  |  |  |
| 123.10 | 40 | 0  | 0  | 0  | 60  | 19  | 50  | 139 | 68 | 134 | 0  |  |  |  |  |  |  |  |
| 123.21 | 50 | 12 | 18 | 0  | 101 | 76  | 87  | 177 | 67 | 0   | 22 |  |  |  |  |  |  |  |
| 123.30 | 61 | 20 | 0  | 12 | 75  | 10  | 190 | 132 | 73 | 172 | 0  |  |  |  |  |  |  |  |
| 123.41 | 42 | 24 | 11 | 32 | 70  | 0   | 175 | 266 | 46 | 175 | 11 |  |  |  |  |  |  |  |
| 123.51 | 62 | 17 | 0  | 0  | 46  | 25  | 91  | 232 | 57 | 51  | 19 |  |  |  |  |  |  |  |
| 123.60 | 57 | 0  | 0  | 0  | 58  | 0   | 83  | 207 | 58 | 50  | 18 |  |  |  |  |  |  |  |
| 123.71 | 26 | 0  | 6  | 0  | 78  | 34  | 0   | 82  | 41 | 55  | 0  |  |  |  |  |  |  |  |
| 123.81 | 29 | 0  | 0  | 6  | 86  | 50  | 16  | 109 | 60 | 86  | 25 |  |  |  |  |  |  |  |
| 123.90 | 50 | 0  | 0  | 12 | 112 | 85  | 0   | 108 | 62 | 176 | 7  |  |  |  |  |  |  |  |
| 124.01 | 40 | 0  | 0  | 0  | 74  | 60  | 62  | 123 | 56 | 271 | 0  |  |  |  |  |  |  |  |
| 124.10 | 52 | 9  | 0  | 0  | 39  | 29  | 74  | 121 | 67 | 131 | 0  |  |  |  |  |  |  |  |
| 124.21 | 34 | 0  | 0  | 0  | 102 | 122 | 56  | 185 | 49 | 419 | 6  |  |  |  |  |  |  |  |
| 124.30 | 39 | 0  | 0  | 0  | 112 | 16  | 26  | 75  | 32 | 174 | 0  |  |  |  |  |  |  |  |
| 124.41 | 31 | 0  | 0  | 17 | 45  | 65  | 63  | 60  | 71 | 215 | 10 |  |  |  |  |  |  |  |
| 124.51 | 39 | 0  | 0  | 31 | 90  | 97  | 78  | 126 | 55 | 198 | 12 |  |  |  |  |  |  |  |
| 124.61 | 52 | 0  | 0  | 0  | 91  | 93  | 34  | 76  | 57 | 391 | 8  |  |  |  |  |  |  |  |
| 124.71 | 26 | 0  | 0  | 30 | 98  | 75  | 135 | 44  | 75 | 207 | 19 |  |  |  |  |  |  |  |
| 124.80 | 19 | 0  | 0  | 0  | 81  | 51  | 60  | 64  | 44 | 370 | 8  |  |  |  |  |  |  |  |
| 124.91 | 28 | 20 | 0  | 0  | 61  | 104 | 50  | 76  | 38 | 450 | 10 |  |  |  |  |  |  |  |
| 125.01 | 24 | 0  | 0  | 0  | 93  | 45  | 108 | 11  | 71 | 406 | 0  |  |  |  |  |  |  |  |
| 125.11 | 44 | 0  | 0  | 42 | 47  | 52  | 37  | 122 | 54 | 368 | 17 |  |  |  |  |  |  |  |
| 125.21 | 44 | 0  | 0  | 30 | 100 | 20  | 119 | 93  | 61 | 192 | 0  |  |  |  |  |  |  |  |
| 125.31 | 33 | 0  | 0  | 42 | 119 | 72  | 136 | 44  | 34 | 353 | 0  |  |  |  |  |  |  |  |
| 125.40 | 66 | 14 | 5  | 12 | 72  | 51  | 0   | 92  | 53 | 237 | 13 |  |  |  |  |  |  |  |
| 125.50 | 47 | 0  | 0  | 0  | 95  | 93  | 172 | 196 | 47 | 213 | 0  |  |  |  |  |  |  |  |
| 125.61 | 67 | 16 | 22 | 6  | 57  | 23  | 185 | 132 | 46 | 328 | 13 |  |  |  |  |  |  |  |
| 125.71 | 35 | 12 | 18 | 31 | 96  | 0   | 105 | 176 | 47 | 111 | 8  |  |  |  |  |  |  |  |
| 125.81 | 45 | 29 | 0  | 19 | 59  | 6   | 70  | 252 | 69 | 0   | 15 |  |  |  |  |  |  |  |
| 125.91 | 45 | 8  | 0  | 0  | 57  | 0   | 0   | 266 | 60 | 54  | 7  |  |  |  |  |  |  |  |
| 126.01 | 42 | 0  | 0  | 0  | 96  | 77  | 49  | 195 | 37 | 0   | 28 |  |  |  |  |  |  |  |
| 126.11 | 35 | 0  | 0  | 9  | 91  | 21  | 107 | 170 | 61 | 45  | 32 |  |  |  |  |  |  |  |
| 126.21 | 58 | 0  | 0  | 0  | 100 | 20  | 101 | 226 | 68 | 0   | 0  |  |  |  |  |  |  |  |
| 126.31 | 44 | 0  | 0  | 10 | 83  | 20  | 0   | 192 | 51 | 9   | 0  |  |  |  |  |  |  |  |
| 126.41 | 30 | 0  | 0  | 29 | 74  | 41  | 97  | 144 | 60 | 181 | 25 |  |  |  |  |  |  |  |
| 126.51 | 32 | 0  | 13 | 17 | 56  | 57  | 0   | 83  | 62 | 194 | 0  |  |  |  |  |  |  |  |
| 126.60 | 31 | 14 | 0  | 41 | 109 | 30  | 95  | 28  | 34 | 198 | 0  |  |  |  |  |  |  |  |
| 126.70 | 35 | 12 | 0  | 0  | 58  | 67  | 36  | 79  | 84 | 247 | 8  |  |  |  |  |  |  |  |
| 126.81 | 33 | 0  | 0  | 10 | 57  | 90  | 39  | 57  | 42 | 185 | 7  |  |  |  |  |  |  |  |
| 126.90 | 61 | 11 | 18 | 6  | 100 | 78  | 138 | 61  | 40 | 426 | 0  |  |  |  |  |  |  |  |
| 127.01 | 33 | 0  | 0  | 14 | 44  | 75  | 21  | 33  | 42 | 271 | 0  |  |  |  |  |  |  |  |
| 127.10 | 51 | 0  | 0  | 40 | 96  | 57  | 37  | 76  | 60 | 446 | 30 |  |  |  |  |  |  |  |
| 127.21 | 40 | 9  | 0  | 0  | 41  | 84  | 170 | 62  | 49 | 307 | 11 |  |  |  |  |  |  |  |
| 127.31 | 22 | 0  | 0  | 14 | 55  | 83  | 158 | 114 | 68 | 347 | 0  |  |  |  |  |  |  |  |
| 127.41 | 65 | 12 | 0  | 27 | 72  | 59  | 105 | 0   | 39 | 233 | 0  |  |  |  |  |  |  |  |
| 127.50 | 25 | 0  | 0  | 0  | 84  | 58  | 77  | 100 | 48 | 248 | 13 |  |  |  |  |  |  |  |

|        |    |    |    |    |     |     |     |     |    |     |    |  |  |  |  |  |  |  |
|--------|----|----|----|----|-----|-----|-----|-----|----|-----|----|--|--|--|--|--|--|--|
| 127.61 | 61 | 0  | 0  | 35 | 98  | 85  | 40  | 106 | 50 | 227 | 6  |  |  |  |  |  |  |  |
| 127.71 | 35 | 0  | 0  | 14 | 94  | 58  | 6   | 55  | 24 | 446 | 24 |  |  |  |  |  |  |  |
| 127.80 | 53 | 23 | 0  | 15 | 83  | 37  | 79  | 76  | 36 | 235 | 16 |  |  |  |  |  |  |  |
| 127.91 | 39 | 0  | 0  | 25 | 39  | 37  | 128 | 119 | 39 | 144 | 0  |  |  |  |  |  |  |  |
| 128.01 | 60 | 0  | 0  | 0  | 99  | 54  | 105 | 249 | 46 | 0   | 9  |  |  |  |  |  |  |  |
| 128.10 | 51 | 0  | 4  | 10 | 74  | 59  | 213 | 180 | 48 | 0   | 11 |  |  |  |  |  |  |  |
| 128.21 | 43 | 9  | 0  | 18 | 61  | 28  | 156 | 135 | 52 | 0   | 29 |  |  |  |  |  |  |  |
| 128.30 | 40 | 0  | 0  | 0  | 83  | 38  | 54  | 257 | 54 | 189 | 0  |  |  |  |  |  |  |  |
| 128.41 | 57 | 0  | 0  | 49 | 63  | 51  | 81  | 146 | 71 | 138 | 13 |  |  |  |  |  |  |  |
| 128.51 | 52 | 14 | 12 | 0  | 68  | 16  | 120 | 140 | 43 | 100 | 26 |  |  |  |  |  |  |  |
| 128.61 | 33 | 0  | 0  | 5  | 66  | 70  | 174 | 119 | 79 | 106 | 19 |  |  |  |  |  |  |  |
| 128.71 | 42 | 0  | 0  | 20 | 71  | 74  | 106 | 24  | 57 | 163 | 23 |  |  |  |  |  |  |  |
| 128.81 | 55 | 0  | 0  | 12 | 102 | 42  | 94  | 108 | 33 | 241 | 12 |  |  |  |  |  |  |  |
| 128.91 | 20 | 0  | 0  | 24 | 72  | 71  | 168 | 81  | 40 | 103 | 10 |  |  |  |  |  |  |  |
| 129.01 | 55 | 0  | 0  | 14 | 70  | 44  | 103 | 79  | 54 | 255 | 6  |  |  |  |  |  |  |  |
| 129.11 | 47 | 0  | 0  | 6  | 65  | 55  | 27  | 52  | 46 | 359 | 5  |  |  |  |  |  |  |  |
| 129.20 | 40 | 0  | 0  | 25 | 36  | 79  | 154 | 93  | 47 | 168 | 10 |  |  |  |  |  |  |  |
| 129.31 | 50 | 0  | 0  | 6  | 65  | 112 | 72  | 58  | 36 | 227 | 0  |  |  |  |  |  |  |  |
| 129.41 | 60 | 0  | 0  | 37 | 52  | 121 | 92  | 56  | 49 | 150 | 0  |  |  |  |  |  |  |  |
| 129.51 | 29 | 0  | 0  | 34 | 91  | 93  | 120 | 163 | 68 | 318 | 0  |  |  |  |  |  |  |  |
| 129.61 | 38 | 0  | 0  | 66 | 97  | 58  | 47  | 137 | 66 | 245 | 21 |  |  |  |  |  |  |  |
| 129.71 | 25 | 0  | 0  | 0  | 95  | 83  | 41  | 99  | 51 | 348 | 23 |  |  |  |  |  |  |  |
| 129.81 | 62 | 0  | 0  | 10 | 79  | 111 | 37  | 104 | 46 | 361 | 15 |  |  |  |  |  |  |  |
| 129.90 | 24 | 0  | 0  | 30 | 47  | 86  | 7   | 32  | 78 | 333 | 6  |  |  |  |  |  |  |  |
| 130.00 | 42 | 0  | 0  | 0  | 95  | 233 | 95  | 93  | 74 | 355 | 17 |  |  |  |  |  |  |  |
| 130.10 | 45 | 0  | 0  | 0  | 94  | 101 | 101 | 33  | 53 | 94  | 0  |  |  |  |  |  |  |  |
| 130.20 | 64 | 0  | 0  | 8  | 88  | 83  | 24  | 25  | 52 | 99  | 0  |  |  |  |  |  |  |  |
| 130.30 | 25 | 14 | 0  | 20 | 62  | 28  | 62  | 71  | 79 | 134 | 27 |  |  |  |  |  |  |  |
| 130.41 | 53 | 0  | 0  | 13 | 103 | 77  | 60  | 56  | 91 | 209 | 9  |  |  |  |  |  |  |  |
| 130.51 | 56 | 0  | 8  | 25 | 50  | 76  | 108 | 27  | 52 | 240 | 27 |  |  |  |  |  |  |  |
| 130.60 | 53 | 8  | 0  | 42 | 56  | 43  | 171 | 118 | 74 | 250 | 0  |  |  |  |  |  |  |  |
| 130.71 | 44 | 8  | 23 | 0  | 83  | 60  | 78  | 67  | 83 | 160 | 23 |  |  |  |  |  |  |  |
| 130.81 | 39 | 0  | 0  | 0  | 42  | 0   | 165 | 219 | 93 | 0   | 4  |  |  |  |  |  |  |  |
| 130.90 | 78 | 35 | 10 | 0  | 42  | 30  | 35  | 242 | 52 | 0   | 0  |  |  |  |  |  |  |  |
| 131.01 | 67 | 7  | 0  | 9  | 65  | 0   | 30  | 174 | 46 | 218 | 11 |  |  |  |  |  |  |  |
| 131.11 | 32 | 8  | 10 | 32 | 38  | 16  | 186 | 197 | 34 | 86  | 0  |  |  |  |  |  |  |  |
| 131.21 | 35 | 7  | 0  | 9  | 36  | 0   | 77  | 172 | 49 | 93  | 18 |  |  |  |  |  |  |  |
| 131.31 | 51 | 0  | 0  | 39 | 66  | 69  | 107 | 230 | 53 | 181 | 20 |  |  |  |  |  |  |  |
| 131.40 | 64 | 0  | 0  | 0  | 71  | 37  | 44  | 80  | 32 | 68  | 33 |  |  |  |  |  |  |  |
| 131.50 | 41 | 0  | 0  | 5  | 94  | 63  | 0   | 62  | 76 | 70  | 6  |  |  |  |  |  |  |  |
| 131.60 | 24 | 0  | 0  | 17 | 105 | 66  | 0   | 85  | 48 | 310 | 8  |  |  |  |  |  |  |  |
| 131.70 | 24 | 0  | 0  | 22 | 82  | 116 | 168 | 66  | 72 | 284 | 0  |  |  |  |  |  |  |  |
| 131.81 | 39 | 0  | 0  | 12 | 34  | 40  | 8   | 235 | 57 | 142 | 10 |  |  |  |  |  |  |  |
| 131.91 | 50 | 0  | 0  | 55 | 100 | 77  | 122 | 62  | 41 | 400 | 19 |  |  |  |  |  |  |  |
| 132.00 | 32 | 0  | 0  | 0  | 55  | 84  | 51  | 52  | 56 | 194 | 0  |  |  |  |  |  |  |  |
| 132.11 | 54 | 0  | 0  | 0  | 49  | 65  | 118 | 72  | 80 | 298 | 23 |  |  |  |  |  |  |  |
| 132.20 | 23 | 0  | 0  | 0  | 48  | 89  | 79  | 14  | 68 | 135 | 11 |  |  |  |  |  |  |  |
| 132.31 | 47 | 0  | 0  | 0  | 78  | 77  | 0   | 41  | 51 | 312 | 0  |  |  |  |  |  |  |  |
| 132.41 | 19 | 0  | 0  | 12 | 80  | 81  | 79  | 62  | 32 | 409 | 35 |  |  |  |  |  |  |  |
| 132.51 | 25 | 0  | 0  | 37 | 71  | 69  | 86  | 112 | 48 | 381 | 24 |  |  |  |  |  |  |  |
| 132.61 | 36 | 0  | 0  | 43 | 60  | 84  | 42  | 87  | 64 | 239 | 11 |  |  |  |  |  |  |  |
| 132.70 | 53 | 0  | 0  | 0  | 82  | 87  | 23  | 189 | 71 | 219 | 9  |  |  |  |  |  |  |  |
| 132.81 | 46 | 4  | 0  | 13 | 109 | 134 | 58  | 18  | 69 | 315 | 6  |  |  |  |  |  |  |  |
| 132.91 | 23 | 0  | 7  | 0  | 90  | 115 | 101 | 5   | 48 | 268 | 0  |  |  |  |  |  |  |  |
| 133.01 | 44 | 0  | 0  | 0  | 46  | 109 | 110 | 93  | 62 | 193 | 12 |  |  |  |  |  |  |  |
| 133.10 | 39 | 0  | 0  | 22 | 102 | 89  | 135 | 109 | 70 | 202 | 12 |  |  |  |  |  |  |  |
| 133.21 | 50 | 0  | 0  | 4  | 90  | 66  | 92  | 177 | 33 | 328 | 0  |  |  |  |  |  |  |  |
| 133.31 | 41 | 0  | 0  | 0  | 53  | 88  | 29  | 74  | 65 | 278 | 8  |  |  |  |  |  |  |  |

|        |    |    |    |    |     |     |     |     |    |     |    |  |  |  |  |  |  |  |
|--------|----|----|----|----|-----|-----|-----|-----|----|-----|----|--|--|--|--|--|--|--|
| 133.41 | 40 | 0  | 0  | 32 | 129 | 87  | 129 | 82  | 54 | 383 | 36 |  |  |  |  |  |  |  |
| 133.51 | 28 | 0  | 0  | 39 | 84  | 53  | 29  | 46  | 52 | 297 | 36 |  |  |  |  |  |  |  |
| 133.60 | 19 | 10 | 0  | 0  | 66  | 92  | 74  | 56  | 44 | 285 | 11 |  |  |  |  |  |  |  |
| 133.71 | 51 | 0  | 0  | 0  | 68  | 23  | 102 | 45  | 55 | 257 | 7  |  |  |  |  |  |  |  |
| 133.81 | 50 | 22 | 0  | 0  | 86  | 68  | 145 | 215 | 61 | 15  | 14 |  |  |  |  |  |  |  |
| 133.91 | 45 | 0  | 0  | 0  | 89  | 41  | 141 | 13  | 49 | 0   | 10 |  |  |  |  |  |  |  |
| 134.01 | 58 | 4  | 18 | 57 | 78  | 58  | 150 | 220 | 67 | 96  | 0  |  |  |  |  |  |  |  |
| 134.11 | 40 | 0  | 0  | 33 | 26  | 42  | 31  | 189 | 33 | 0   | 21 |  |  |  |  |  |  |  |
| 134.21 | 48 | 0  | 0  | 31 | 41  | 77  | 83  | 138 | 69 | 43  | 12 |  |  |  |  |  |  |  |
| 134.30 | 31 | 6  | 0  | 53 | 69  | 89  | 67  | 127 | 65 | 102 | 21 |  |  |  |  |  |  |  |
| 134.41 | 49 | 15 | 0  | 0  | 69  | 40  | 59  | 109 | 47 | 72  | 16 |  |  |  |  |  |  |  |
| 134.51 | 43 | 0  | 0  | 22 | 49  | 74  | 55  | 111 | 49 | 103 | 13 |  |  |  |  |  |  |  |
| 134.61 | 57 | 0  | 0  | 26 | 81  | 35  | 48  | 54  | 61 | 85  | 4  |  |  |  |  |  |  |  |
| 134.71 | 35 | 0  | 0  | 8  | 88  | 54  | 0   | 87  | 75 | 332 | 0  |  |  |  |  |  |  |  |
| 134.81 | 50 | 0  | 0  | 0  | 40  | 96  | 105 | 108 | 55 | 252 | 23 |  |  |  |  |  |  |  |
| 134.90 | 31 | 0  | 0  | 14 | 57  | 83  | 94  | 121 | 50 | 347 | 25 |  |  |  |  |  |  |  |
| 135.00 | 34 | 0  | 9  | 0  | 56  | 50  | 5   | 200 | 69 | 277 | 0  |  |  |  |  |  |  |  |
| 135.10 | 48 | 0  | 0  | 10 | 51  | 62  | 165 | 25  | 53 | 340 | 7  |  |  |  |  |  |  |  |
| 135.20 | 41 | 0  | 0  | 8  | 77  | 79  | 71  | 165 | 74 | 212 | 13 |  |  |  |  |  |  |  |
| 135.31 | 48 | 0  | 0  | 0  | 103 | 162 | 0   | 121 | 60 | 541 | 4  |  |  |  |  |  |  |  |
| 135.41 | 35 | 0  | 0  | 0  | 44  | 116 | 92  | 175 | 72 | 384 | 0  |  |  |  |  |  |  |  |
| 135.51 | 29 | 8  | 0  | 13 | 83  | 67  | 73  | 107 | 66 | 244 | 0  |  |  |  |  |  |  |  |
| 135.61 | 38 | 0  | 0  | 21 | 103 | 55  | 78  | 109 | 42 | 97  | 38 |  |  |  |  |  |  |  |
| 135.71 | 44 | 0  | 0  | 4  | 61  | 40  | 58  | 26  | 85 | 249 | 0  |  |  |  |  |  |  |  |
| 135.81 | 32 | 0  | 0  | 0  | 33  | 20  | 28  | 0   | 87 | 307 | 26 |  |  |  |  |  |  |  |
| 135.90 | 46 | 0  | 0  | 19 | 48  | 108 | 57  | 100 | 62 | 279 | 31 |  |  |  |  |  |  |  |
| 136.01 | 41 | 0  | 0  | 31 | 74  | 86  | 107 | 62  | 55 | 389 | 0  |  |  |  |  |  |  |  |
| 136.11 | 56 | 8  | 0  | 34 | 71  | 68  | 77  | 17  | 73 | 151 | 22 |  |  |  |  |  |  |  |
| 136.21 | 43 | 0  | 0  | 8  | 66  | 85  | 83  | 38  | 69 | 268 | 16 |  |  |  |  |  |  |  |
| 136.30 | 32 | 0  | 0  | 0  | 106 | 96  | 107 | 126 | 86 | 275 | 8  |  |  |  |  |  |  |  |
| 136.41 | 20 | 0  | 0  | 37 | 88  | 40  | 114 | 50  | 74 | 330 | 0  |  |  |  |  |  |  |  |
| 136.51 | 43 | 0  | 0  | 9  | 73  | 44  | 168 | 33  | 51 | 218 | 14 |  |  |  |  |  |  |  |
| 136.61 | 34 | 0  | 0  | 15 | 88  | 82  | 189 | 67  | 56 | 239 | 6  |  |  |  |  |  |  |  |
| 136.71 | 32 | 0  | 0  | 15 | 79  | 93  | 116 | 172 | 34 | 310 | 0  |  |  |  |  |  |  |  |
| 136.80 | 35 | 17 | 0  | 22 | 61  | 73  | 81  | 144 | 76 | 74  | 10 |  |  |  |  |  |  |  |
| 136.91 | 30 | 6  | 8  | 0  | 131 | 124 | 197 | 241 | 60 | 80  | 5  |  |  |  |  |  |  |  |
| 137.01 | 25 | 9  | 0  | 25 | 65  | 0   | 97  | 126 | 53 | 0   | 18 |  |  |  |  |  |  |  |
| 137.11 | 69 | 15 | 0  | 41 | 48  | 19  | 71  | 75  | 54 | 0   | 20 |  |  |  |  |  |  |  |
| 137.21 | 47 | 30 | 12 | 9  | 75  | 0   | 23  | 109 | 72 | 0   | 9  |  |  |  |  |  |  |  |
| 137.31 | 36 | 0  | 0  | 0  | 13  | 53  | 48  | 187 | 40 | 187 | 9  |  |  |  |  |  |  |  |
| 137.40 | 49 | 0  | 0  | 0  | 79  | 25  | 5   | 195 | 69 | 0   | 11 |  |  |  |  |  |  |  |
| 137.51 | 48 | 7  | 0  | 0  | 46  | 44  | 47  | 122 | 6  | 0   | 30 |  |  |  |  |  |  |  |
| 137.61 | 40 | 0  | 0  | 20 | 20  | 43  | 119 | 108 | 64 | 27  | 23 |  |  |  |  |  |  |  |
| 137.71 | 61 | 0  | 4  | 0  | 44  | 64  | 0   | 47  | 21 | 6   | 16 |  |  |  |  |  |  |  |
| 137.81 | 34 | 5  | 0  | 26 | 70  | 62  | 101 | 62  | 41 | 134 | 5  |  |  |  |  |  |  |  |
| 137.90 | 45 | 0  | 5  | 44 | 65  | 55  | 68  | 57  | 55 | 198 | 9  |  |  |  |  |  |  |  |
| 138.00 | 47 | 0  | 0  | 18 | 85  | 36  | 74  | 43  | 78 | 99  | 17 |  |  |  |  |  |  |  |
| 138.11 | 50 | 0  | 0  | 32 | 73  | 113 | 144 | 104 | 22 | 249 | 32 |  |  |  |  |  |  |  |
| 138.21 | 37 | 21 | 0  | 28 | 64  | 77  | 63  | 18  | 74 | 288 | 19 |  |  |  |  |  |  |  |
| 138.30 | 33 | 0  | 0  | 0  | 66  | 70  | 83  | 130 | 58 | 153 | 7  |  |  |  |  |  |  |  |
| 138.41 | 16 | 0  | 0  | 20 | 119 | 75  | 20  | 138 | 60 | 201 | 11 |  |  |  |  |  |  |  |
| 138.51 | 38 | 15 | 0  | 19 | 67  | 70  | 46  | 37  | 63 | 159 | 23 |  |  |  |  |  |  |  |
| 138.61 | 36 | 0  | 0  | 39 | 58  | 63  | 120 | 153 | 41 | 187 | 0  |  |  |  |  |  |  |  |
| 138.71 | 35 | 0  | 0  | 17 | 58  | 79  | 8   | 109 | 48 | 209 | 17 |  |  |  |  |  |  |  |
| 138.80 | 15 | 5  | 0  | 9  | 67  | 57  | 160 | 138 | 63 | 145 | 9  |  |  |  |  |  |  |  |
| 138.90 | 54 | 0  | 8  | 0  | 57  | 111 | 12  | 86  | 49 | 156 | 17 |  |  |  |  |  |  |  |
| 139.01 | 39 | 0  | 0  | 28 | 57  | 87  | 46  | 58  | 56 | 78  | 0  |  |  |  |  |  |  |  |
| 139.11 | 71 | 0  | 0  | 33 | 38  | 78  | 101 | 182 | 62 | 213 | 5  |  |  |  |  |  |  |  |

|        |    |    |    |    |     |     |     |     |     |     |    |  |  |  |  |  |  |  |
|--------|----|----|----|----|-----|-----|-----|-----|-----|-----|----|--|--|--|--|--|--|--|
| 139.21 | 39 | 0  | 0  | 14 | 64  | 103 | 23  | 87  | 49  | 229 | 0  |  |  |  |  |  |  |  |
| 139.31 | 30 | 0  | 0  | 24 | 26  | 90  | 131 | 73  | 45  | 322 | 6  |  |  |  |  |  |  |  |
| 139.41 | 22 | 0  | 10 | 0  | 65  | 69  | 189 | 117 | 69  | 198 | 25 |  |  |  |  |  |  |  |
| 139.51 | 34 | 0  | 0  | 17 | 68  | 29  | 70  | 74  | 52  | 130 | 0  |  |  |  |  |  |  |  |
| 139.61 | 31 | 0  | 5  | 0  | 81  | 36  | 122 | 83  | 34  | 227 | 0  |  |  |  |  |  |  |  |
| 139.70 | 34 | 0  | 0  | 32 | 56  | 111 | 35  | 137 | 61  | 298 | 0  |  |  |  |  |  |  |  |
| 139.81 | 44 | 26 | 0  | 20 | 64  | 32  | 78  | 16  | 50  | 279 | 13 |  |  |  |  |  |  |  |
| 139.91 | 36 | 0  | 0  | 5  | 71  | 65  | 122 | 69  | 60  | 294 | 6  |  |  |  |  |  |  |  |
| 140.01 | 68 | 0  | 0  | 28 | 101 | 43  | 208 | 25  | 79  | 344 | 0  |  |  |  |  |  |  |  |
| 140.11 | 43 | 0  | 0  | 28 | 59  | 87  | 143 | 44  | 48  | 217 | 4  |  |  |  |  |  |  |  |
| 140.20 | 35 | 0  | 0  | 20 | 70  | 63  | 97  | 40  | 77  | 307 | 18 |  |  |  |  |  |  |  |
| 140.31 | 21 | 0  | 0  | 31 | 58  | 70  | 128 | 105 | 67  | 394 | 0  |  |  |  |  |  |  |  |
| 140.41 | 65 | 0  | 0  | 22 | 120 | 103 | 136 | 115 | 50  | 72  | 10 |  |  |  |  |  |  |  |
| 140.50 | 44 | 0  | 0  | 12 | 44  | 76  | 38  | 194 | 74  | 253 | 15 |  |  |  |  |  |  |  |
| 140.61 | 44 | 12 | 0  | 0  | 81  | 54  | 129 | 145 | 49  | 365 | 0  |  |  |  |  |  |  |  |
| 140.71 | 59 | 0  | 13 | 18 | 70  | 85  | 69  | 51  | 48  | 123 | 16 |  |  |  |  |  |  |  |
| 140.81 | 70 | 0  | 0  | 0  | 32  | 61  | 169 | 143 | 61  | 201 | 11 |  |  |  |  |  |  |  |
| 140.91 | 45 | 0  | 0  | 8  | 98  | 28  | 163 | 153 | 77  | 263 | 27 |  |  |  |  |  |  |  |
| 141.01 | 72 | 13 | 16 | 0  | 59  | 70  | 105 | 85  | 74  | 189 | 16 |  |  |  |  |  |  |  |
| 141.11 | 67 | 22 | 0  | 33 | 73  | 76  | 196 | 113 | 50  | 0   | 15 |  |  |  |  |  |  |  |
| 141.20 | 50 | 0  | 0  | 6  | 96  | 74  | 175 | 130 | 55  | 0   | 5  |  |  |  |  |  |  |  |
| 141.31 | 75 | 7  | 0  | 0  | 53  | 64  | 157 | 160 | 55  | 118 | 15 |  |  |  |  |  |  |  |
| 141.41 | 37 | 0  | 0  | 9  | 89  | 7   | 87  | 231 | 61  | 84  | 7  |  |  |  |  |  |  |  |
| 141.50 | 54 | 0  | 0  | 0  | 86  | 35  | 124 | 82  | 61  | 69  | 4  |  |  |  |  |  |  |  |
| 141.61 | 63 | 11 | 0  | 23 | 56  | 80  | 214 | 43  | 54  | 253 | 34 |  |  |  |  |  |  |  |
| 141.71 | 54 | 5  | 0  | 0  | 110 | 36  | 34  | 175 | 49  | 69  | 0  |  |  |  |  |  |  |  |
| 141.81 | 39 | 0  | 0  | 0  | 62  | 0   | 0   | 0   | 60  | 163 | 11 |  |  |  |  |  |  |  |
| 141.90 | 48 | 5  | 0  | 0  | 67  | 70  | 79  | 42  | 38  | 172 | 0  |  |  |  |  |  |  |  |
| 142.01 | 64 | 0  | 0  | 38 | 87  | 118 | 53  | 78  | 43  | 166 | 15 |  |  |  |  |  |  |  |
| 142.10 | 90 | 0  | 0  | 4  | 62  | 118 | 0   | 25  | 61  | 15  | 0  |  |  |  |  |  |  |  |
| 142.21 | 54 | 7  | 0  | 19 | 29  | 41  | 10  | 106 | 90  | 131 | 8  |  |  |  |  |  |  |  |
| 142.31 | 20 | 13 | 0  | 0  | 78  | 102 | 105 | 72  | 57  | 216 | 18 |  |  |  |  |  |  |  |
| 142.40 | 44 | 0  | 0  | 0  | 72  | 74  | 40  | 203 | 51  | 183 | 4  |  |  |  |  |  |  |  |
| 142.51 | 52 | 6  | 0  | 32 | 78  | 119 | 178 | 165 | 52  | 101 | 15 |  |  |  |  |  |  |  |
| 142.60 | 36 | 0  | 0  | 33 | 79  | 127 | 52  | 99  | 63  | 170 | 14 |  |  |  |  |  |  |  |
| 142.71 | 41 | 0  | 0  | 28 | 68  | 57  | 57  | 43  | 54  | 186 | 31 |  |  |  |  |  |  |  |
| 142.80 | 56 | 0  | 0  | 19 | 123 | 86  | 119 | 133 | 51  | 138 | 0  |  |  |  |  |  |  |  |
| 142.90 | 60 | 0  | 7  | 27 | 77  | 77  | 0   | 242 | 69  | 153 | 18 |  |  |  |  |  |  |  |
| 143.01 | 30 | 0  | 0  | 0  | 95  | 119 | 0   | 144 | 65  | 279 | 0  |  |  |  |  |  |  |  |
| 143.10 | 46 | 0  | 0  | 14 | 30  | 94  | 158 | 102 | 49  | 301 | 0  |  |  |  |  |  |  |  |
| 143.21 | 37 | 10 | 0  | 0  | 85  | 114 | 28  | 47  | 80  | 270 | 18 |  |  |  |  |  |  |  |
| 143.31 | 37 | 0  | 0  | 8  | 61  | 99  | 30  | 44  | 79  | 275 | 0  |  |  |  |  |  |  |  |
| 143.41 | 41 | 0  | 0  | 0  | 81  | 83  | 151 | 166 | 51  | 185 | 7  |  |  |  |  |  |  |  |
| 143.51 | 42 | 0  | 0  | 0  | 73  | 112 | 94  | 38  | 47  | 166 | 30 |  |  |  |  |  |  |  |
| 143.61 | 50 | 0  | 0  | 16 | 78  | 66  | 76  | 0   | 63  | 290 | 16 |  |  |  |  |  |  |  |
| 143.71 | 30 | 0  | 0  | 0  | 75  | 95  | 124 | 117 | 77  | 260 | 6  |  |  |  |  |  |  |  |
| 143.81 | 55 | 0  | 0  | 23 | 91  | 51  | 112 | 161 | 55  | 342 | 0  |  |  |  |  |  |  |  |
| 143.91 | 11 | 0  | 0  | 29 | 61  | 54  | 108 | 89  | 43  | 260 | 18 |  |  |  |  |  |  |  |
| 144.01 | 34 | 6  | 0  | 0  | 57  | 95  | 28  | 76  | 65  | 260 | 9  |  |  |  |  |  |  |  |
| 144.10 | 41 | 6  | 8  | 0  | 96  | 94  | 43  | 104 | 50  | 157 | 6  |  |  |  |  |  |  |  |
| 144.21 | 56 | 0  | 0  | 0  | 95  | 95  | 32  | 183 | 114 | 201 | 11 |  |  |  |  |  |  |  |
| 144.30 | 74 | 0  | 9  | 7  | 86  | 50  | 79  | 80  | 70  | 0   | 21 |  |  |  |  |  |  |  |
| 144.41 | 47 | 10 | 0  | 9  | 72  | 40  | 73  | 120 | 68  | 238 | 9  |  |  |  |  |  |  |  |
| 144.50 | 54 | 17 | 27 | 0  | 69  | 76  | 109 | 141 | 80  | 217 | 0  |  |  |  |  |  |  |  |
| 144.61 | 36 | 0  | 15 | 0  | 70  | 38  | 160 | 104 | 73  | 107 | 40 |  |  |  |  |  |  |  |
| 144.71 | 56 | 0  | 0  | 0  | 124 | 60  | 187 | 129 | 89  | 126 | 0  |  |  |  |  |  |  |  |
| 144.81 | 70 | 8  | 0  | 27 | 66  | 68  | 176 | 102 | 83  | 9   | 13 |  |  |  |  |  |  |  |
| 144.91 | 42 | 15 | 8  | 12 | 18  | 56  | 91  | 166 | 57  | 71  | 9  |  |  |  |  |  |  |  |

|        |    |    |    |    |     |     |     |     |     |     |    |  |  |  |  |  |  |  |
|--------|----|----|----|----|-----|-----|-----|-----|-----|-----|----|--|--|--|--|--|--|--|
| 145.00 | 57 | 19 | 0  | 0  | 63  | 87  | 43  | 227 | 89  | 135 | 48 |  |  |  |  |  |  |  |
| 145.11 | 41 | 0  | 0  | 31 | 30  | 102 | 96  | 240 | 75  | 221 | 7  |  |  |  |  |  |  |  |
| 145.21 | 35 | 9  | 0  | 23 | 0   | 39  | 68  | 76  | 51  | 188 | 14 |  |  |  |  |  |  |  |
| 145.31 | 48 | 0  | 33 | 15 | 81  | 71  | 68  | 138 | 65  | 0   | 24 |  |  |  |  |  |  |  |
| 145.41 | 58 | 0  | 0  | 8  | 77  | 78  | 138 | 52  | 77  | 155 | 0  |  |  |  |  |  |  |  |
| 145.51 | 72 | 0  | 0  | 24 | 25  | 45  | 93  | 89  | 56  | 0   | 50 |  |  |  |  |  |  |  |
| 145.61 | 55 | 19 | 0  | 8  | 112 | 77  | 140 | 120 | 96  | 125 | 27 |  |  |  |  |  |  |  |
| 145.71 | 41 | 0  | 0  | 22 | 67  | 76  | 61  | 77  | 115 | 113 | 18 |  |  |  |  |  |  |  |
| 145.81 | 55 | 12 | 0  | 24 | 65  | 40  | 101 | 79  | 83  | 225 | 0  |  |  |  |  |  |  |  |
| 145.91 | 32 | 25 | 11 | 13 | 82  | 39  | 179 | 102 | 58  | 46  | 0  |  |  |  |  |  |  |  |
| 146.00 | 52 | 8  | 0  | 8  | 90  | 43  | 62  | 165 | 86  | 89  | 11 |  |  |  |  |  |  |  |
| 146.10 | 34 | 0  | 0  | 26 | 51  | 59  | 147 | 69  | 70  | 254 | 0  |  |  |  |  |  |  |  |
| 146.20 | 47 | 0  | 0  | 7  | 108 | 76  | 195 | 42  | 82  | 148 | 10 |  |  |  |  |  |  |  |
| 146.31 | 58 | 0  | 7  | 0  | 85  | 82  | 96  | 55  | 83  | 154 | 17 |  |  |  |  |  |  |  |
| 146.41 | 57 | 0  | 0  | 25 | 86  | 61  | 89  | 166 | 79  | 179 | 0  |  |  |  |  |  |  |  |
| 146.50 | 22 | 0  | 0  | 0  | 100 | 50  | 68  | 139 | 65  | 237 | 20 |  |  |  |  |  |  |  |
| 146.61 | 58 | 11 | 0  | 21 | 136 | 121 | 267 | 92  | 67  | 80  | 8  |  |  |  |  |  |  |  |
| 146.70 | 34 | 0  | 0  | 21 | 84  | 112 | 50  | 174 | 94  | 112 | 18 |  |  |  |  |  |  |  |
| 146.81 | 34 | 0  | 0  | 35 | 27  | 126 | 70  | 29  | 71  | 129 | 16 |  |  |  |  |  |  |  |
| 146.91 | 36 | 7  | 0  | 28 | 21  | 41  | 78  | 59  | 77  | 263 | 21 |  |  |  |  |  |  |  |
| 147.01 | 65 | 5  | 18 | 14 | 103 | 85  | 14  | 0   | 92  | 328 | 4  |  |  |  |  |  |  |  |
| 147.11 | 63 | 0  | 0  | 18 | 64  | 65  | 124 | 86  | 80  | 272 | 0  |  |  |  |  |  |  |  |
| 147.20 | 38 | 26 | 0  | 31 | 78  | 96  | 90  | 30  | 78  | 144 | 0  |  |  |  |  |  |  |  |
| 147.31 | 19 | 0  | 0  | 0  | 122 | 102 | 207 | 54  | 68  | 223 | 13 |  |  |  |  |  |  |  |
| 147.40 | 52 | 0  | 0  | 15 | 74  | 85  | 162 | 87  | 76  | 256 | 18 |  |  |  |  |  |  |  |
| 147.51 | 34 | 0  | 0  | 19 | 71  | 49  | 52  | 72  | 72  | 195 | 13 |  |  |  |  |  |  |  |
| 147.61 | 46 | 0  | 0  | 30 | 82  | 41  | 148 | 129 | 86  | 353 | 0  |  |  |  |  |  |  |  |
| 147.71 | 55 | 11 | 0  | 30 | 84  | 82  | 0   | 16  | 61  | 115 | 33 |  |  |  |  |  |  |  |
| 147.81 | 36 | 7  | 0  | 13 | 51  | 64  | 59  | 71  | 56  | 153 | 0  |  |  |  |  |  |  |  |
| 147.91 | 58 | 0  | 0  | 87 | 73  | 68  | 95  | 140 | 58  | 306 | 0  |  |  |  |  |  |  |  |
| 148.01 | 41 | 0  | 4  | 0  | 74  | 86  | 81  | 25  | 61  | 180 | 20 |  |  |  |  |  |  |  |
| 148.11 | 34 | 0  | 0  | 0  | 57  | 114 | 161 | 120 | 77  | 197 | 18 |  |  |  |  |  |  |  |
| 148.21 | 58 | 4  | 0  | 0  | 79  | 86  | 25  | 89  | 72  | 205 | 0  |  |  |  |  |  |  |  |
| 148.31 | 61 | 17 | 5  | 19 | 62  | 50  | 126 | 14  | 97  | 0   | 0  |  |  |  |  |  |  |  |
| 148.41 | 59 | 17 | 0  | 0  | 89  | 53  | 134 | 219 | 70  | 100 | 7  |  |  |  |  |  |  |  |
| 148.51 | 42 | 16 | 0  | 24 | 58  | 32  | 109 | 118 | 76  | 132 | 0  |  |  |  |  |  |  |  |
| 148.60 | 76 | 13 | 0  | 12 | 47  | 60  | 42  | 209 | 66  | 130 | 18 |  |  |  |  |  |  |  |
| 148.70 | 59 | 0  | 0  | 34 | 43  | 47  | 104 | 167 | 88  | 74  | 0  |  |  |  |  |  |  |  |
| 148.80 | 48 | 14 | 0  | 15 | 48  | 78  | 129 | 59  | 58  | 32  | 8  |  |  |  |  |  |  |  |
| 148.91 | 46 | 0  | 0  | 11 | 84  | 25  | 154 | 248 | 68  | 167 | 0  |  |  |  |  |  |  |  |
| 149.00 | 65 | 13 | 8  | 0  | 54  | 64  | 142 | 218 | 86  | 0   | 0  |  |  |  |  |  |  |  |
| 149.11 | 37 | 11 | 0  | 7  | 65  | 0   | 132 | 164 | 74  | 16  | 24 |  |  |  |  |  |  |  |
| 149.21 | 44 | 19 | 8  | 0  | 58  | 55  | 47  | 115 | 71  | 0   | 17 |  |  |  |  |  |  |  |
| 149.30 | 42 | 0  | 0  | 4  | 15  | 28  | 49  | 66  | 67  | 29  | 0  |  |  |  |  |  |  |  |
| 149.40 | 66 | 7  | 0  | 0  | 87  | 42  | 61  | 180 | 58  | 0   | 20 |  |  |  |  |  |  |  |
| 149.51 | 74 | 17 | 0  | 36 | 63  | 44  | 61  | 180 | 70  | 57  | 10 |  |  |  |  |  |  |  |
| 149.60 | 75 | 7  | 0  | 24 | 31  | 18  | 101 | 45  | 73  | 310 | 0  |  |  |  |  |  |  |  |
| 149.70 | 57 | 5  | 0  | 0  | 76  | 68  | 27  | 85  | 45  | 40  | 29 |  |  |  |  |  |  |  |
| 149.81 | 42 | 0  | 0  | 17 | 0   | 50  | 40  | 64  | 96  | 258 | 0  |  |  |  |  |  |  |  |
| 149.90 | 31 | 0  | 0  | 12 | 69  | 86  | 89  | 267 | 78  | 123 | 17 |  |  |  |  |  |  |  |
| 150.00 | 59 | 0  | 0  | 30 | 128 | 76  | 0   | 131 | 74  | 212 | 10 |  |  |  |  |  |  |  |
| 150.11 | 45 | 0  | 0  | 0  | 86  | 66  | 102 | 143 | 108 | 180 | 0  |  |  |  |  |  |  |  |
| 150.21 | 49 | 9  | 0  | 27 | 94  | 77  | 77  | 85  | 90  | 41  | 12 |  |  |  |  |  |  |  |
| 150.31 | 60 | 0  | 0  | 5  | 114 | 81  | 130 | 130 | 76  | 316 | 0  |  |  |  |  |  |  |  |
| 150.40 | 29 | 0  | 0  | 34 | 71  | 65  | 0   | 94  | 71  | 101 | 15 |  |  |  |  |  |  |  |
| 150.51 | 48 | 0  | 0  | 5  | 92  | 88  | 146 | 137 | 71  | 228 | 0  |  |  |  |  |  |  |  |
| 150.60 | 41 | 0  | 0  | 0  | 64  | 68  | 62  | 127 | 87  | 424 | 26 |  |  |  |  |  |  |  |
| 150.70 | 25 | 0  | 0  | 0  | 42  | 35  | 126 | 127 | 82  | 123 | 0  |  |  |  |  |  |  |  |

|        |    |    |    |    |     |     |     |     |     |     |    |  |  |  |  |  |  |  |  |
|--------|----|----|----|----|-----|-----|-----|-----|-----|-----|----|--|--|--|--|--|--|--|--|
| 150.81 | 61 | 7  | 15 | 5  | 64  | 104 | 171 | 45  | 81  | 122 | 9  |  |  |  |  |  |  |  |  |
| 150.90 | 36 | 8  | 0  | 10 | 62  | 77  | 12  | 153 | 68  | 212 | 12 |  |  |  |  |  |  |  |  |
| 151.01 | 50 | 25 | 0  | 0  | 73  | 48  | 37  | 73  | 85  | 352 | 15 |  |  |  |  |  |  |  |  |
| 151.11 | 10 | 0  | 0  | 0  | 56  | 82  | 15  | 26  | 55  | 272 | 37 |  |  |  |  |  |  |  |  |
| 151.21 | 42 | 0  | 0  | 27 | 75  | 111 | 0   | 108 | 75  | 230 | 40 |  |  |  |  |  |  |  |  |
| 151.31 | 49 | 0  | 0  | 23 | 109 | 58  | 69  | 10  | 75  | 66  | 0  |  |  |  |  |  |  |  |  |
| 151.41 | 27 | 0  | 0  | 35 | 118 | 139 | 131 | 219 | 102 | 114 | 12 |  |  |  |  |  |  |  |  |
| 151.51 | 58 | 5  | 0  | 9  | 62  | 58  | 43  | 130 | 63  | 281 | 11 |  |  |  |  |  |  |  |  |
| 151.61 | 37 | 0  | 0  | 17 | 64  | 54  | 156 | 116 | 57  | 269 | 19 |  |  |  |  |  |  |  |  |
| 151.71 | 26 | 0  | 0  | 6  | 127 | 76  | 24  | 108 | 100 | 226 | 13 |  |  |  |  |  |  |  |  |
| 151.81 | 40 | 0  | 0  | 10 | 75  | 74  | 54  | 45  | 59  | 194 | 10 |  |  |  |  |  |  |  |  |
| 151.90 | 62 | 0  | 0  | 40 | 70  | 51  | 119 | 131 | 77  | 341 | 35 |  |  |  |  |  |  |  |  |
| 152.01 | 48 | 0  | 0  | 6  | 30  | 82  | 93  | 25  | 90  | 357 | 14 |  |  |  |  |  |  |  |  |
| 152.11 | 22 | 0  | 0  | 17 | 87  | 70  | 164 | 114 | 86  | 346 | 0  |  |  |  |  |  |  |  |  |
| 152.21 | 40 | 0  | 0  | 33 | 60  | 150 | 114 | 69  | 103 | 122 | 15 |  |  |  |  |  |  |  |  |
| 152.30 | 70 | 0  | 0  | 11 | 55  | 113 | 161 | 120 | 74  | 204 | 6  |  |  |  |  |  |  |  |  |
| 152.40 | 32 | 0  | 0  | 0  | 51  | 58  | 107 | 79  | 98  | 114 | 15 |  |  |  |  |  |  |  |  |
| 152.51 | 62 | 0  | 0  | 0  | 21  | 32  | 102 | 13  | 117 | 279 | 0  |  |  |  |  |  |  |  |  |
| 152.61 | 55 | 0  | 0  | 31 | 56  | 84  | 147 | 57  | 94  | 271 | 0  |  |  |  |  |  |  |  |  |
| 152.70 | 51 | 0  | 0  | 29 | 62  | 27  | 78  | 8   | 102 | 171 | 0  |  |  |  |  |  |  |  |  |
| 152.81 | 53 | 10 | 0  | 4  | 63  | 71  | 19  | 207 | 110 | 292 | 14 |  |  |  |  |  |  |  |  |
| 152.91 | 29 | 0  | 0  | 0  | 67  | 81  | 103 | 77  | 80  | 161 | 4  |  |  |  |  |  |  |  |  |
| 153.00 | 44 | 19 | 0  | 30 | 37  | 57  | 59  | 147 | 84  | 198 | 13 |  |  |  |  |  |  |  |  |
| 153.11 | 46 | 0  | 0  | 14 | 88  | 109 | 160 | 86  | 38  | 133 | 0  |  |  |  |  |  |  |  |  |
| 153.20 | 29 | 0  | 0  | 14 | 63  | 37  | 152 | 100 | 92  | 57  | 32 |  |  |  |  |  |  |  |  |
| 153.31 | 37 | 0  | 0  | 0  | 66  | 85  | 97  | 156 | 73  | 388 | 19 |  |  |  |  |  |  |  |  |
| 153.41 | 44 | 20 | 0  | 58 | 51  | 39  | 0   | 130 | 104 | 118 | 22 |  |  |  |  |  |  |  |  |
| 153.51 | 44 | 0  | 7  | 20 | 71  | 117 | 155 | 244 | 90  | 109 | 37 |  |  |  |  |  |  |  |  |
| 153.61 | 61 | 16 | 0  | 8  | 78  | 107 | 50  | 94  | 79  | 15  | 0  |  |  |  |  |  |  |  |  |
| 153.71 | 66 | 0  | 9  | 45 | 97  | 54  | 52  | 106 | 86  | 273 | 30 |  |  |  |  |  |  |  |  |
| 153.81 | 54 | 0  | 0  | 40 | 41  | 9   | 9   | 103 | 101 | 0   | 30 |  |  |  |  |  |  |  |  |
| 153.90 | 86 | 20 | 0  | 29 | 14  | 17  | 26  | 67  | 103 | 163 | 6  |  |  |  |  |  |  |  |  |
| 154.00 | 64 | 0  | 0  | 0  | 89  | 38  | 96  | 220 | 88  | 18  | 14 |  |  |  |  |  |  |  |  |
| 154.11 | 49 | 0  | 0  | 10 | 67  | 61  | 72  | 173 | 101 | 120 | 31 |  |  |  |  |  |  |  |  |
| 154.21 | 43 | 0  | 0  | 0  | 74  | 63  | 79  | 171 | 65  | 176 | 0  |  |  |  |  |  |  |  |  |
| 154.31 | 53 | 0  | 0  | 24 | 48  | 77  | 158 | 183 | 54  | 282 | 9  |  |  |  |  |  |  |  |  |
| 154.41 | 52 | 14 | 0  | 35 | 66  | 108 | 134 | 127 | 101 | 135 | 0  |  |  |  |  |  |  |  |  |
| 154.51 | 57 | 0  | 12 | 25 | 87  | 47  | 84  | 133 | 88  | 0   | 22 |  |  |  |  |  |  |  |  |
| 154.61 | 33 | 12 | 0  | 16 | 22  | 71  | 133 | 144 | 73  | 62  | 0  |  |  |  |  |  |  |  |  |
| 154.70 | 39 | 0  | 0  | 30 | 71  | 59  | 36  | 57  | 92  | 211 | 36 |  |  |  |  |  |  |  |  |
| 154.81 | 39 | 0  | 0  | 10 | 52  | 87  | 196 | 120 | 89  | 162 | 0  |  |  |  |  |  |  |  |  |
| 154.90 | 55 | 0  | 0  | 0  | 81  | 54  | 161 | 153 | 54  | 195 | 15 |  |  |  |  |  |  |  |  |
| 155.01 | 61 | 0  | 0  | 4  | 112 | 72  | 90  | 247 | 67  | 46  | 0  |  |  |  |  |  |  |  |  |
| 155.11 | 59 | 0  | 0  | 0  | 39  | 80  | 199 | 182 | 61  | 60  | 0  |  |  |  |  |  |  |  |  |
| 155.20 | 73 | 0  | 0  | 7  | 82  | 112 | 108 | 207 | 88  | 7   | 11 |  |  |  |  |  |  |  |  |
| 155.31 | 39 | 13 | 0  | 53 | 52  | 82  | 92  | 232 | 105 | 253 | 6  |  |  |  |  |  |  |  |  |
| 155.40 | 39 | 9  | 0  | 27 | 88  | 81  | 129 | 230 | 98  | 0   | 16 |  |  |  |  |  |  |  |  |
| 155.51 | 52 | 0  | 0  | 23 | 81  | 0   | 58  | 109 | 75  | 65  | 18 |  |  |  |  |  |  |  |  |
| 155.61 | 41 | 11 | 0  | 24 | 73  | 71  | 187 | 145 | 88  | 256 | 0  |  |  |  |  |  |  |  |  |
| 155.71 | 49 | 0  | 0  | 0  | 68  | 75  | 56  | 192 | 89  | 260 | 0  |  |  |  |  |  |  |  |  |
| 155.80 | 46 | 0  | 0  | 0  | 35  | 142 | 223 | 71  | 78  | 211 | 18 |  |  |  |  |  |  |  |  |
| 155.91 | 35 | 12 | 6  | 0  | 119 | 46  | 154 | 178 | 108 | 109 | 11 |  |  |  |  |  |  |  |  |
| 156.01 | 40 | 25 | 0  | 0  | 77  | 111 | 57  | 127 | 104 | 92  | 0  |  |  |  |  |  |  |  |  |
| 156.10 | 65 | 5  | 9  | 9  | 69  | 68  | 161 | 87  | 75  | 128 | 13 |  |  |  |  |  |  |  |  |
| 156.21 | 46 | 0  | 0  | 0  | 79  | 94  | 23  | 106 | 83  | 244 | 35 |  |  |  |  |  |  |  |  |
| 156.31 | 28 | 29 | 0  | 25 | 113 | 116 | 91  | 117 | 88  | 128 | 26 |  |  |  |  |  |  |  |  |
| 156.40 | 43 | 0  | 0  | 15 | 109 | 56  | 155 | 166 | 87  | 97  | 0  |  |  |  |  |  |  |  |  |
| 156.51 | 40 | 0  | 0  | 42 | 80  | 77  | 48  | 169 | 73  | 184 | 0  |  |  |  |  |  |  |  |  |

|        |    |    |    |    |     |     |     |     |     |     |    |  |  |  |  |  |  |  |
|--------|----|----|----|----|-----|-----|-----|-----|-----|-----|----|--|--|--|--|--|--|--|
| 156.61 | 33 | 0  | 0  | 7  | 45  | 71  | 137 | 156 | 84  | 123 | 0  |  |  |  |  |  |  |  |
| 156.70 | 36 | 0  | 0  | 0  | 66  | 75  | 69  | 119 | 77  | 151 | 21 |  |  |  |  |  |  |  |
| 156.81 | 45 | 0  | 0  | 0  | 107 | 126 | 160 | 130 | 83  | 83  | 14 |  |  |  |  |  |  |  |
| 156.91 | 80 | 0  | 0  | 7  | 74  | 112 | 123 | 43  | 78  | 396 | 8  |  |  |  |  |  |  |  |
| 157.01 | 28 | 7  | 0  | 19 | 74  | 97  | 93  | 91  | 85  | 63  | 40 |  |  |  |  |  |  |  |
| 157.11 | 63 | 0  | 0  | 0  | 122 | 97  | 153 | 98  | 37  | 42  | 31 |  |  |  |  |  |  |  |
| 157.21 | 50 | 10 | 0  | 27 | 106 | 95  | 44  | 160 | 92  | 270 | 23 |  |  |  |  |  |  |  |
| 157.31 | 51 | 0  | 0  | 10 | 56  | 87  | 98  | 4   | 80  | 157 | 5  |  |  |  |  |  |  |  |
| 157.40 | 57 | 0  | 0  | 26 | 34  | 105 | 68  | 232 | 92  | 225 | 8  |  |  |  |  |  |  |  |
| 157.50 | 40 | 0  | 7  | 0  | 68  | 87  | 26  | 172 | 88  | 62  | 18 |  |  |  |  |  |  |  |
| 157.61 | 63 | 0  | 0  | 14 | 55  | 141 | 38  | 96  | 102 | 206 | 0  |  |  |  |  |  |  |  |
| 157.70 | 47 | 12 | 0  | 0  | 42  | 43  | 51  | 97  | 90  | 105 | 0  |  |  |  |  |  |  |  |
| 157.80 | 42 | 0  | 9  | 39 | 49  | 63  | 91  | 84  | 91  | 197 | 21 |  |  |  |  |  |  |  |
| 157.90 | 55 | 7  | 0  | 0  | 104 | 86  | 170 | 136 | 83  | 201 | 19 |  |  |  |  |  |  |  |
| 158.01 | 50 | 9  | 7  | 0  | 75  | 110 | 104 | 72  | 93  | 160 | 0  |  |  |  |  |  |  |  |
| 158.11 | 39 | 15 | 0  | 0  | 59  | 118 | 87  | 149 | 114 | 239 | 28 |  |  |  |  |  |  |  |
| 158.21 | 43 | 8  | 0  | 49 | 72  | 105 | 94  | 271 | 110 | 125 | 8  |  |  |  |  |  |  |  |
| 158.31 | 50 | 7  | 0  | 36 | 85  | 135 | 73  | 148 | 76  | 191 | 0  |  |  |  |  |  |  |  |
| 158.41 | 52 | 11 | 0  | 20 | 20  | 149 | 170 | 130 | 110 | 282 | 11 |  |  |  |  |  |  |  |
| 158.50 | 53 | 19 | 8  | 18 | 67  | 85  | 173 | 86  | 76  | 280 | 0  |  |  |  |  |  |  |  |
| 158.61 | 44 | 11 | 0  | 26 | 44  | 121 | 119 | 80  | 81  | 124 | 10 |  |  |  |  |  |  |  |
| 158.71 | 25 | 0  | 0  | 0  | 44  | 121 | 189 | 137 | 109 | 187 | 36 |  |  |  |  |  |  |  |
| 158.81 | 40 | 0  | 9  | 39 | 104 | 68  | 172 | 149 | 103 | 201 | 0  |  |  |  |  |  |  |  |
| 158.91 | 20 | 0  | 0  | 38 | 54  | 102 | 158 | 168 | 72  | 0   | 25 |  |  |  |  |  |  |  |
| 159.00 | 54 | 19 | 0  | 16 | 66  | 86  | 89  | 109 | 72  | 0   | 26 |  |  |  |  |  |  |  |
| 159.11 | 39 | 11 | 0  | 22 | 58  | 62  | 45  | 106 | 87  | 86  | 21 |  |  |  |  |  |  |  |
| 159.20 | 46 | 0  | 0  | 29 | 22  | 47  | 40  | 218 | 78  | 306 | 7  |  |  |  |  |  |  |  |
| 159.30 | 77 | 35 | 13 | 34 | 84  | 78  | 37  | 134 | 84  | 0   | 0  |  |  |  |  |  |  |  |
| 159.41 | 46 | 0  | 0  | 0  | 67  | 94  | 117 | 175 | 107 | 194 | 27 |  |  |  |  |  |  |  |
| 159.51 | 68 | 13 | 0  | 45 | 49  | 91  | 53  | 87  | 79  | 165 | 28 |  |  |  |  |  |  |  |
| 159.61 | 54 | 0  | 0  | 0  | 54  | 97  | 50  | 138 | 82  | 245 | 0  |  |  |  |  |  |  |  |
| 159.71 | 25 | 0  | 0  | 29 | 77  | 115 | 82  | 121 | 111 | 48  | 7  |  |  |  |  |  |  |  |
| 159.81 | 32 | 19 | 0  | 12 | 64  | 89  | 101 | 0   | 81  | 276 | 17 |  |  |  |  |  |  |  |
| 159.91 | 38 | 0  | 0  | 26 | 51  | 130 | 113 | 147 | 94  | 162 | 6  |  |  |  |  |  |  |  |
| 160.00 | 54 | 0  | 0  | 21 | 53  | 79  | 33  | 155 | 75  | 0   | 0  |  |  |  |  |  |  |  |
| 160.11 | 27 | 0  | 0  | 0  | 67  | 82  | 58  | 156 | 84  | 200 | 17 |  |  |  |  |  |  |  |
| 160.20 | 48 | 19 | 0  | 45 | 62  | 85  | 216 | 209 | 55  | 157 | 22 |  |  |  |  |  |  |  |
| 160.31 | 31 | 7  | 0  | 0  | 75  | 104 | 62  | 204 | 106 | 198 | 32 |  |  |  |  |  |  |  |
| 160.40 | 34 | 8  | 0  | 0  | 50  | 103 | 0   | 154 | 66  | 122 | 6  |  |  |  |  |  |  |  |
| 160.51 | 27 | 0  | 0  | 0  | 101 | 80  | 105 | 169 | 82  | 159 | 0  |  |  |  |  |  |  |  |
| 160.61 | 10 | 0  | 0  | 25 | 45  | 44  | 140 | 182 | 84  | 0   | 20 |  |  |  |  |  |  |  |
| 160.71 | 15 | 0  | 10 | 17 | 88  | 79  | 218 | 100 | 99  | 29  | 26 |  |  |  |  |  |  |  |
| 160.80 | 54 | 5  | 0  | 17 | 24  | 113 | 217 | 56  | 121 | 80  | 0  |  |  |  |  |  |  |  |
| 160.91 | 35 | 8  | 0  | 0  | 26  | 159 | 71  | 67  | 92  | 85  | 0  |  |  |  |  |  |  |  |
| 161.00 | 48 | 0  | 0  | 24 | 71  | 103 | 103 | 186 | 75  | 174 | 0  |  |  |  |  |  |  |  |
| 161.11 | 47 | 0  | 0  | 16 | 92  | 73  | 93  | 149 | 87  | 94  | 27 |  |  |  |  |  |  |  |
| 161.21 | 58 | 6  | 0  | 0  | 80  | 42  | 19  | 82  | 101 | 198 | 0  |  |  |  |  |  |  |  |
| 161.30 | 37 | 10 | 0  | 7  | 47  | 132 | 53  | 121 | 83  | 158 | 23 |  |  |  |  |  |  |  |
| 161.41 | 38 | 0  | 6  | 12 | 87  | 130 | 173 | 127 | 101 | 86  | 10 |  |  |  |  |  |  |  |
| 161.50 | 35 | 20 | 0  | 11 | 98  | 86  | 65  | 145 | 98  | 109 | 0  |  |  |  |  |  |  |  |
| 161.61 | 42 | 13 | 0  | 9  | 38  | 102 | 170 | 189 | 98  | 83  | 39 |  |  |  |  |  |  |  |
| 161.71 | 26 | 0  | 0  | 0  | 69  | 92  | 16  | 158 | 105 | 244 | 22 |  |  |  |  |  |  |  |
| 161.81 | 59 | 10 | 0  | 35 | 132 | 72  | 113 | 238 | 136 | 31  | 0  |  |  |  |  |  |  |  |
| 161.91 | 37 | 7  | 0  | 0  | 90  | 99  | 157 | 124 | 122 | 208 | 16 |  |  |  |  |  |  |  |
| 162.01 | 67 | 0  | 0  | 17 | 43  | 118 | 61  | 181 | 130 | 270 | 35 |  |  |  |  |  |  |  |
| 162.10 | 41 | 35 | 0  | 0  | 63  | 139 | 125 | 169 | 97  | 131 | 9  |  |  |  |  |  |  |  |
| 162.21 | 62 | 0  | 0  | 26 | 100 | 111 | 39  | 163 | 99  | 56  | 12 |  |  |  |  |  |  |  |
| 162.30 | 35 | 21 | 0  | 28 | 97  | 80  | 44  | 103 | 111 | 71  | 0  |  |  |  |  |  |  |  |

|        |    |    |    |    |     |     |     |     |     |     |    |  |  |  |  |  |  |  |
|--------|----|----|----|----|-----|-----|-----|-----|-----|-----|----|--|--|--|--|--|--|--|
| 162.40 | 55 | 0  | 0  | 6  | 58  | 99  | 89  | 139 | 107 | 142 | 19 |  |  |  |  |  |  |  |
| 162.51 | 32 | 0  | 0  | 0  | 70  | 128 | 182 | 36  | 102 | 199 | 24 |  |  |  |  |  |  |  |
| 162.60 | 65 | 22 | 0  | 11 | 99  | 103 | 106 | 138 | 108 | 184 | 0  |  |  |  |  |  |  |  |
| 162.71 | 41 | 0  | 0  | 0  | 33  | 146 | 199 | 183 | 108 | 59  | 8  |  |  |  |  |  |  |  |
| 162.80 | 57 | 0  | 0  | 11 | 45  | 113 | 166 | 188 | 127 | 119 | 7  |  |  |  |  |  |  |  |
| 162.91 | 46 | 10 | 10 | 17 | 69  | 71  | 66  | 65  | 102 | 161 | 0  |  |  |  |  |  |  |  |
| 163.01 | 34 | 0  | 0  | 39 | 66  | 67  | 71  | 100 | 133 | 170 | 0  |  |  |  |  |  |  |  |
| 163.10 | 61 | 5  | 0  | 0  | 44  | 98  | 182 | 168 | 115 | 165 | 0  |  |  |  |  |  |  |  |
| 163.21 | 29 | 0  | 5  | 28 | 79  | 147 | 76  | 97  | 94  | 57  | 0  |  |  |  |  |  |  |  |
| 163.30 | 51 | 0  | 0  | 25 | 72  | 128 | 89  | 140 | 123 | 186 | 10 |  |  |  |  |  |  |  |
| 163.41 | 61 | 0  | 0  | 0  | 93  | 143 | 166 | 155 | 96  | 211 | 0  |  |  |  |  |  |  |  |
| 163.51 | 61 | 0  | 13 | 18 | 115 | 131 | 151 | 128 | 118 | 0   | 0  |  |  |  |  |  |  |  |
| 163.61 | 78 | 0  | 0  | 31 | 81  | 135 | 0   | 127 | 84  | 141 | 22 |  |  |  |  |  |  |  |
| 163.71 | 13 | 5  | 0  | 0  | 44  | 145 | 76  | 176 | 98  | 56  | 13 |  |  |  |  |  |  |  |
| 163.81 | 41 | 0  | 0  | 13 | 65  | 145 | 183 | 147 | 103 | 124 | 25 |  |  |  |  |  |  |  |
| 163.91 | 39 | 15 | 0  | 26 | 32  | 104 | 49  | 211 | 107 | 181 | 0  |  |  |  |  |  |  |  |
| 164.01 | 62 | 0  | 0  | 35 | 97  | 105 | 139 | 117 | 103 | 288 | 14 |  |  |  |  |  |  |  |
| 164.11 | 46 | 0  | 0  | 0  | 80  | 110 | 82  | 69  | 118 | 167 | 20 |  |  |  |  |  |  |  |
| 164.21 | 36 | 0  | 0  | 10 | 98  | 124 | 31  | 109 | 86  | 387 | 0  |  |  |  |  |  |  |  |
| 164.31 | 59 | 32 | 0  | 28 | 49  | 149 | 53  | 102 | 128 | 149 | 0  |  |  |  |  |  |  |  |
| 164.41 | 61 | 0  | 0  | 47 | 54  | 90  | 95  | 49  | 92  | 165 | 11 |  |  |  |  |  |  |  |
| 164.51 | 39 | 5  | 4  | 26 | 61  | 77  | 80  | 14  | 139 | 263 | 17 |  |  |  |  |  |  |  |
| 164.61 | 41 | 0  | 0  | 8  | 77  | 135 | 84  | 130 | 111 | 247 | 18 |  |  |  |  |  |  |  |
| 164.70 | 64 | 16 | 0  | 14 | 93  | 110 | 93  | 30  | 65  | 159 | 9  |  |  |  |  |  |  |  |
| 164.81 | 62 | 37 | 5  | 19 | 41  | 121 | 34  | 65  | 99  | 312 | 0  |  |  |  |  |  |  |  |
| 164.91 | 58 | 0  | 0  | 0  | 81  | 80  | 24  | 95  | 104 | 290 | 6  |  |  |  |  |  |  |  |
| 165.00 | 71 | 0  | 8  | 17 | 51  | 141 | 39  | 162 | 78  | 8   | 28 |  |  |  |  |  |  |  |
| 165.11 | 68 | 5  | 0  | 45 | 86  | 127 | 111 | 110 | 154 | 187 | 0  |  |  |  |  |  |  |  |
| 165.21 | 51 | 0  | 12 | 26 | 58  | 100 | 148 | 131 | 94  | 107 | 17 |  |  |  |  |  |  |  |
| 165.31 | 61 | 15 | 0  | 4  | 97  | 114 | 84  | 47  | 105 | 69  | 11 |  |  |  |  |  |  |  |
| 165.41 | 31 | 6  | 0  | 28 | 59  | 109 | 52  | 101 | 103 | 275 | 32 |  |  |  |  |  |  |  |
| 165.50 | 61 | 0  | 0  | 0  | 35  | 31  | 98  | 260 | 101 | 286 | 8  |  |  |  |  |  |  |  |
| 165.61 | 43 | 15 | 0  | 0  | 56  | 111 | 145 | 151 | 61  | 179 | 0  |  |  |  |  |  |  |  |
| 165.70 | 49 | 0  | 0  | 0  | 65  | 115 | 74  | 89  | 98  | 135 | 25 |  |  |  |  |  |  |  |
| 165.80 | 54 | 10 | 0  | 0  | 27  | 111 | 79  | 149 | 106 | 73  | 0  |  |  |  |  |  |  |  |
| 165.91 | 34 | 0  | 0  | 14 | 81  | 81  | 18  | 147 | 89  | 283 | 5  |  |  |  |  |  |  |  |
| 166.00 | 53 | 19 | 5  | 0  | 28  | 72  | 103 | 110 | 67  | 75  | 25 |  |  |  |  |  |  |  |
| 166.10 | 48 | 13 | 0  | 59 | 29  | 34  | 81  | 153 | 111 | 173 | 35 |  |  |  |  |  |  |  |
| 166.21 | 36 | 0  | 0  | 45 | 76  | 155 | 55  | 102 | 117 | 84  | 0  |  |  |  |  |  |  |  |
| 166.30 | 54 | 16 | 0  | 6  | 61  | 27  | 37  | 95  | 76  | 77  | 14 |  |  |  |  |  |  |  |
| 166.40 | 46 | 37 | 25 | 0  | 101 | 121 | 143 | 154 | 87  | 230 | 12 |  |  |  |  |  |  |  |
| 166.51 | 63 | 9  | 0  | 0  | 41  | 16  | 179 | 115 | 107 | 143 | 9  |  |  |  |  |  |  |  |
| 166.61 | 51 | 0  | 0  | 0  | 88  | 95  | 121 | 131 | 106 | 263 | 13 |  |  |  |  |  |  |  |
| 166.71 | 46 | 0  | 0  | 0  | 59  | 77  | 71  | 166 | 83  | 161 | 19 |  |  |  |  |  |  |  |
| 166.81 | 79 | 0  | 0  | 0  | 84  | 117 | 146 | 155 | 91  | 130 | 20 |  |  |  |  |  |  |  |
| 166.91 | 41 | 0  | 0  | 0  | 73  | 147 | 203 | 238 | 92  | 219 | 31 |  |  |  |  |  |  |  |
| 167.01 | 37 | 33 | 9  | 0  | 68  | 69  | 164 | 115 | 113 | 174 | 11 |  |  |  |  |  |  |  |
| 167.10 | 47 | 13 | 0  | 17 | 57  | 154 | 53  | 83  | 93  | 166 | 10 |  |  |  |  |  |  |  |
| 167.21 | 69 | 4  | 7  | 14 | 91  | 58  | 79  | 126 | 124 | 348 | 7  |  |  |  |  |  |  |  |
| 167.31 | 38 | 0  | 0  | 0  | 100 | 99  | 148 | 89  | 82  | 97  | 35 |  |  |  |  |  |  |  |
| 167.41 | 36 | 0  | 0  | 13 | 72  | 37  | 177 | 129 | 73  | 28  | 18 |  |  |  |  |  |  |  |
| 167.51 | 70 | 5  | 0  | 49 | 66  | 124 | 63  | 161 | 117 | 131 | 8  |  |  |  |  |  |  |  |
| 167.60 | 58 | 0  | 0  | 0  | 72  | 79  | 63  | 114 | 96  | 272 | 31 |  |  |  |  |  |  |  |
| 167.71 | 40 | 5  | 0  | 44 | 82  | 99  | 59  | 140 | 124 | 97  | 12 |  |  |  |  |  |  |  |
| 167.81 | 55 | 0  | 0  | 9  | 79  | 107 | 45  | 218 | 100 | 260 | 13 |  |  |  |  |  |  |  |
| 167.91 | 18 | 0  | 0  | 21 | 87  | 92  | 173 | 156 | 101 | 164 | 0  |  |  |  |  |  |  |  |
| 168.01 | 27 | 0  | 0  | 12 | 47  | 77  | 176 | 219 | 113 | 59  | 14 |  |  |  |  |  |  |  |
| 168.10 | 43 | 9  | 0  | 7  | 36  | 81  | 69  | 245 | 105 | 107 | 6  |  |  |  |  |  |  |  |

|        |    |    |    |    |     |     |     |     |     |     |    |  |  |  |  |  |  |  |
|--------|----|----|----|----|-----|-----|-----|-----|-----|-----|----|--|--|--|--|--|--|--|
| 168.21 | 49 | 12 | 0  | 16 | 52  | 105 | 162 | 66  | 105 | 159 | 10 |  |  |  |  |  |  |  |
| 168.31 | 49 | 7  | 0  | 0  | 50  | 122 | 103 | 201 | 107 | 76  | 24 |  |  |  |  |  |  |  |
| 168.41 | 35 | 13 | 0  | 0  | 116 | 125 | 22  | 193 | 120 | 168 | 8  |  |  |  |  |  |  |  |
| 168.50 | 49 | 20 | 23 | 8  | 79  | 91  | 103 | 97  | 97  | 165 | 0  |  |  |  |  |  |  |  |
| 168.61 | 49 | 0  | 0  | 0  | 46  | 50  | 144 | 100 | 154 | 139 | 0  |  |  |  |  |  |  |  |
| 168.70 | 76 | 9  | 0  | 0  | 114 | 51  | 9   | 96  | 101 | 0   | 6  |  |  |  |  |  |  |  |
| 168.81 | 46 | 0  | 0  | 0  | 68  | 111 | 43  | 120 | 116 | 213 | 4  |  |  |  |  |  |  |  |
| 168.91 | 46 | 0  | 0  | 32 | 75  | 99  | 32  | 116 | 98  | 150 | 10 |  |  |  |  |  |  |  |
| 169.00 | 57 | 10 | 0  | 0  | 77  | 119 | 41  | 0   | 114 | 122 | 4  |  |  |  |  |  |  |  |
| 169.11 | 43 | 0  | 0  | 26 | 54  | 84  | 78  | 95  | 93  | 152 | 0  |  |  |  |  |  |  |  |
| 169.21 | 41 | 6  | 0  | 16 | 92  | 125 | 114 | 108 | 96  | 74  | 5  |  |  |  |  |  |  |  |
| 169.30 | 38 | 0  | 0  | 11 | 108 | 112 | 32  | 99  | 158 | 115 | 0  |  |  |  |  |  |  |  |
| 169.41 | 17 | 0  | 0  | 0  | 76  | 62  | 0   | 138 | 84  | 528 | 19 |  |  |  |  |  |  |  |
| 169.51 | 45 | 0  | 0  | 0  | 95  | 85  | 72  | 131 | 116 | 141 | 25 |  |  |  |  |  |  |  |
| 169.61 | 46 | 0  | 0  | 0  | 97  | 124 | 62  | 75  | 127 | 19  | 39 |  |  |  |  |  |  |  |
| 169.71 | 77 | 0  | 0  | 0  | 89  | 112 | 114 | 101 | 101 | 185 | 23 |  |  |  |  |  |  |  |
| 169.81 | 48 | 8  | 0  | 17 | 115 | 107 | 160 | 84  | 76  | 100 | 14 |  |  |  |  |  |  |  |
| 169.91 | 46 | 0  | 0  | 0  | 54  | 106 | 81  | 138 | 122 | 34  | 7  |  |  |  |  |  |  |  |
| 170.01 | 40 | 0  | 0  | 24 | 97  | 183 | 77  | 243 | 121 | 134 | 37 |  |  |  |  |  |  |  |
| 170.11 | 57 | 0  | 0  | 19 | 68  | 108 | 237 | 298 | 125 | 440 | 0  |  |  |  |  |  |  |  |
| 170.21 | 62 | 0  | 0  | 35 | 65  | 81  | 131 | 62  | 113 | 231 | 9  |  |  |  |  |  |  |  |
| 170.30 | 53 | 30 | 23 | 0  | 34  | 110 | 214 | 133 | 123 | 0   | 10 |  |  |  |  |  |  |  |
| 170.41 | 66 | 12 | 0  | 33 | 61  | 76  | 83  | 135 | 126 | 109 | 8  |  |  |  |  |  |  |  |
| 170.50 | 44 | 26 | 6  | 9  | 74  | 140 | 4   | 186 | 126 | 0   | 6  |  |  |  |  |  |  |  |
| 170.61 | 69 | 0  | 0  | 0  | 71  | 101 | 125 | 176 | 139 | 295 | 15 |  |  |  |  |  |  |  |
| 170.71 | 44 | 12 | 9  | 0  | 43  | 0   | 69  | 43  | 112 | 100 | 4  |  |  |  |  |  |  |  |
| 170.80 | 22 | 0  | 0  | 0  | 69  | 79  | 152 | 123 | 116 | 67  | 22 |  |  |  |  |  |  |  |
| 170.90 | 43 | 0  | 0  | 62 | 87  | 78  | 175 | 122 | 121 | 42  | 15 |  |  |  |  |  |  |  |
| 171.00 | 37 | 22 | 0  | 7  | 0   | 109 | 183 | 105 | 101 | 123 | 0  |  |  |  |  |  |  |  |
| 171.11 | 70 | 0  | 15 | 0  | 80  | 61  | 144 | 200 | 127 | 52  | 0  |  |  |  |  |  |  |  |
| 171.21 | 22 | 0  | 0  | 14 | 29  | 82  | 102 | 149 | 94  | 154 | 0  |  |  |  |  |  |  |  |
| 171.31 | 56 | 0  | 0  | 7  | 51  | 82  | 199 | 272 | 139 | 179 | 5  |  |  |  |  |  |  |  |
| 171.41 | 26 | 5  | 26 | 0  | 0   | 96  | 109 | 136 | 105 | 88  | 0  |  |  |  |  |  |  |  |
| 171.50 | 44 | 0  | 0  | 0  | 14  | 5   | 55  | 174 | 99  | 48  | 20 |  |  |  |  |  |  |  |
| 171.60 | 48 | 5  | 0  | 28 | 67  | 113 | 134 | 183 | 127 | 20  | 28 |  |  |  |  |  |  |  |
| 171.71 | 65 | 0  | 0  | 6  | 51  | 107 | 122 | 191 | 145 | 60  | 7  |  |  |  |  |  |  |  |
| 171.80 | 72 | 12 | 0  | 21 | 68  | 62  | 52  | 154 | 103 | 40  | 0  |  |  |  |  |  |  |  |
| 171.91 | 34 | 0  | 0  | 33 | 28  | 108 | 127 | 240 | 132 | 187 | 0  |  |  |  |  |  |  |  |
| 172.00 | 57 | 0  | 0  | 10 | 64  | 173 | 36  | 208 | 155 | 173 | 16 |  |  |  |  |  |  |  |
| 172.10 | 43 | 8  | 0  | 12 | 70  | 142 | 130 | 162 | 125 | 243 | 27 |  |  |  |  |  |  |  |
| 172.20 | 42 | 0  | 0  | 0  | 54  | 91  | 167 | 169 | 127 | 119 | 0  |  |  |  |  |  |  |  |
| 172.31 | 65 | 25 | 0  | 16 | 83  | 21  | 77  | 228 | 91  | 158 | 10 |  |  |  |  |  |  |  |
| 172.41 | 67 | 16 | 0  | 31 | 51  | 69  | 249 | 191 | 142 | 242 | 24 |  |  |  |  |  |  |  |
| 172.51 | 53 | 11 | 21 | 0  | 70  | 109 | 24  | 164 | 120 | 24  | 0  |  |  |  |  |  |  |  |
| 172.60 | 71 | 0  | 0  | 31 | 37  | 93  | 92  | 196 | 143 | 363 | 14 |  |  |  |  |  |  |  |
| 172.71 | 62 | 0  | 11 | 0  | 92  | 70  | 80  | 182 | 109 | 379 | 0  |  |  |  |  |  |  |  |
| 172.80 | 31 | 9  | 0  | 6  | 39  | 10  | 115 | 189 | 98  | 222 | 18 |  |  |  |  |  |  |  |
| 172.91 | 44 | 10 | 0  | 0  | 120 | 106 | 15  | 107 | 141 | 87  | 12 |  |  |  |  |  |  |  |
| 173.01 | 62 | 0  | 0  | 33 | 61  | 60  | 0   | 124 | 159 | 263 | 0  |  |  |  |  |  |  |  |
| 173.10 | 52 | 0  | 0  | 58 | 68  | 74  | 174 | 0   | 112 | 184 | 12 |  |  |  |  |  |  |  |
| 173.21 | 29 | 7  | 0  | 12 | 112 | 69  | 83  | 243 | 125 | 170 | 0  |  |  |  |  |  |  |  |
| 173.30 | 61 | 0  | 0  | 36 | 67  | 39  | 111 | 257 | 126 | 362 | 0  |  |  |  |  |  |  |  |
| 173.40 | 27 | 0  | 0  | 40 | 58  | 137 | 0   | 160 | 128 | 282 | 0  |  |  |  |  |  |  |  |
| 173.51 | 55 | 0  | 0  | 18 | 33  | 122 | 110 | 96  | 167 | 343 | 21 |  |  |  |  |  |  |  |
| 173.60 | 31 | 12 | 0  | 36 | 93  | 128 | 76  | 113 | 109 | 99  | 5  |  |  |  |  |  |  |  |
| 173.71 | 29 | 0  | 0  | 28 | 30  | 108 | 59  | 106 | 140 | 159 | 0  |  |  |  |  |  |  |  |
| 173.81 | 31 | 0  | 0  | 22 | 48  | 116 | 148 | 161 | 130 | 47  | 0  |  |  |  |  |  |  |  |
| 173.90 | 64 | 0  | 0  | 0  | 105 | 105 | 131 | 146 | 118 | 210 | 10 |  |  |  |  |  |  |  |

|        |    |    |    |    |     |     |     |     |     |     |    |  |  |  |  |  |  |  |
|--------|----|----|----|----|-----|-----|-----|-----|-----|-----|----|--|--|--|--|--|--|--|
| 174.01 | 23 | 0  | 0  | 18 | 24  | 104 | 78  | 82  | 133 | 345 | 0  |  |  |  |  |  |  |  |
| 174.11 | 43 | 4  | 0  | 19 | 77  | 69  | 79  | 58  | 150 | 157 | 13 |  |  |  |  |  |  |  |
| 174.21 | 58 | 6  | 0  | 0  | 50  | 116 | 78  | 103 | 134 | 307 | 17 |  |  |  |  |  |  |  |
| 174.31 | 33 | 0  | 0  | 22 | 16  | 20  | 34  | 96  | 143 | 226 | 16 |  |  |  |  |  |  |  |
| 174.40 | 72 | 0  | 0  | 24 | 64  | 84  | 159 | 56  | 132 | 346 | 17 |  |  |  |  |  |  |  |
| 174.50 | 66 | 15 | 0  | 49 | 63  | 54  | 146 | 187 | 89  | 310 | 11 |  |  |  |  |  |  |  |
| 174.61 | 27 | 0  | 0  | 0  | 45  | 88  | 125 | 190 | 104 | 0   | 16 |  |  |  |  |  |  |  |
| 174.71 | 51 | 7  | 0  | 24 | 48  | 71  | 0   | 183 | 91  | 171 | 0  |  |  |  |  |  |  |  |
| 174.81 | 67 | 7  | 0  | 0  | 37  | 86  | 122 | 124 | 118 | 107 | 13 |  |  |  |  |  |  |  |
| 174.91 | 46 | 14 | 0  | 17 | 47  | 84  | 39  | 155 | 139 | 198 | 5  |  |  |  |  |  |  |  |
| 175.01 | 61 | 9  | 11 | 0  | 36  | 93  | 143 | 72  | 133 | 57  | 0  |  |  |  |  |  |  |  |
| 175.11 | 52 | 0  | 0  | 0  | 44  | 12  | 125 | 108 | 139 | 246 | 6  |  |  |  |  |  |  |  |
| 175.21 | 54 | 0  | 0  | 38 | 86  | 89  | 98  | 62  | 103 | 114 | 38 |  |  |  |  |  |  |  |
| 175.31 | 44 | 14 | 0  | 0  | 44  | 72  | 149 | 149 | 142 | 0   | 17 |  |  |  |  |  |  |  |
| 175.41 | 30 | 4  | 14 | 20 | 77  | 94  | 105 | 224 | 112 | 203 | 33 |  |  |  |  |  |  |  |
| 175.50 | 39 | 10 | 8  | 68 | 86  | 79  | 148 | 106 | 137 | 122 | 42 |  |  |  |  |  |  |  |
| 175.61 | 57 | 7  | 0  | 30 | 61  | 107 | 76  | 258 | 128 | 155 | 0  |  |  |  |  |  |  |  |
| 175.71 | 43 | 12 | 13 | 27 | 28  | 74  | 47  | 229 | 130 | 44  | 16 |  |  |  |  |  |  |  |
| 175.81 | 39 | 12 | 9  | 0  | 98  | 109 | 191 | 129 | 124 | 0   | 12 |  |  |  |  |  |  |  |
| 175.91 | 39 | 0  | 6  | 11 | 101 | 28  | 186 | 202 | 107 | 96  | 0  |  |  |  |  |  |  |  |
| 176.00 | 71 | 0  | 0  | 0  | 38  | 36  | 114 | 156 | 139 | 0   | 11 |  |  |  |  |  |  |  |
| 176.11 | 43 | 0  | 8  | 0  | 94  | 87  | 131 | 207 | 176 | 201 | 26 |  |  |  |  |  |  |  |
| 176.21 | 39 | 0  | 0  | 16 | 93  | 12  | 95  | 132 | 126 | 89  | 36 |  |  |  |  |  |  |  |
| 176.30 | 51 | 33 | 0  | 0  | 31  | 79  | 0   | 170 | 102 | 198 | 24 |  |  |  |  |  |  |  |
| 176.40 | 51 | 0  | 0  | 0  | 89  | 55  | 129 | 217 | 124 | 82  | 31 |  |  |  |  |  |  |  |
| 176.50 | 46 | 7  | 14 | 33 | 71  | 57  | 122 | 182 | 107 | 107 | 15 |  |  |  |  |  |  |  |
| 176.60 | 57 | 0  | 0  | 6  | 37  | 27  | 99  | 156 | 127 | 0   | 5  |  |  |  |  |  |  |  |
| 176.71 | 63 | 12 | 0  | 50 | 60  | 109 | 92  | 135 | 91  | 0   | 0  |  |  |  |  |  |  |  |
| 176.81 | 82 | 17 | 16 | 22 | 139 | 76  | 96  | 224 | 126 | 253 | 0  |  |  |  |  |  |  |  |
| 176.91 | 36 | 0  | 0  | 0  | 63  | 48  | 91  | 182 | 118 | 0   | 10 |  |  |  |  |  |  |  |
| 177.01 | 34 | 0  | 0  | 13 | 124 | 90  | 99  | 171 | 97  | 109 | 15 |  |  |  |  |  |  |  |
| 177.11 | 54 | 22 | 5  | 38 | 57  | 29  | 44  | 235 | 111 | 124 | 21 |  |  |  |  |  |  |  |
| 177.21 | 48 | 10 | 0  | 32 | 56  | 20  | 70  | 61  | 110 | 83  | 18 |  |  |  |  |  |  |  |
| 177.30 | 32 | 11 | 0  | 16 | 50  | 100 | 39  | 136 | 97  | 258 | 15 |  |  |  |  |  |  |  |
| 177.41 | 44 | 7  | 0  | 20 | 61  | 141 | 139 | 137 | 127 | 125 | 25 |  |  |  |  |  |  |  |
| 177.51 | 60 | 5  | 0  | 17 | 64  | 37  | 0   | 41  | 92  | 233 | 15 |  |  |  |  |  |  |  |
| 177.61 | 52 | 0  | 0  | 9  | 97  | 120 | 108 | 32  | 105 | 121 | 29 |  |  |  |  |  |  |  |
| 177.71 | 58 | 0  | 0  | 31 | 60  | 102 | 0   | 136 | 127 | 306 | 5  |  |  |  |  |  |  |  |
| 177.80 | 24 | 0  | 4  | 40 | 42  | 58  | 156 | 167 | 140 | 173 | 0  |  |  |  |  |  |  |  |
| 177.91 | 50 | 0  | 0  | 40 | 98  | 133 | 31  | 249 | 127 | 260 | 17 |  |  |  |  |  |  |  |
| 178.01 | 77 | 8  | 0  | 0  | 67  | 51  | 77  | 150 | 146 | 141 | 11 |  |  |  |  |  |  |  |
| 178.10 | 77 | 0  | 0  | 7  | 118 | 107 | 66  | 129 | 123 | 197 | 7  |  |  |  |  |  |  |  |
| 178.21 | 68 | 0  | 0  | 35 | 99  | 64  | 94  | 173 | 109 | 156 | 23 |  |  |  |  |  |  |  |
| 178.30 | 41 | 0  | 0  | 0  | 87  | 139 | 90  | 128 | 108 | 369 | 9  |  |  |  |  |  |  |  |
| 178.41 | 88 | 10 | 0  | 0  | 69  | 57  | 129 | 154 | 166 | 122 | 19 |  |  |  |  |  |  |  |
| 178.51 | 51 | 7  | 10 | 21 | 77  | 79  | 64  | 135 | 127 | 260 | 27 |  |  |  |  |  |  |  |
| 178.61 | 50 | 17 | 0  | 6  | 77  | 97  | 112 | 124 | 125 | 311 | 24 |  |  |  |  |  |  |  |
| 178.71 | 83 | 18 | 18 | 0  | 74  | 85  | 77  | 222 | 146 | 0   | 45 |  |  |  |  |  |  |  |
| 178.81 | 58 | 17 | 0  | 0  | 60  | 81  | 105 | 180 | 108 | 203 | 0  |  |  |  |  |  |  |  |
| 178.90 | 46 | 0  | 7  | 38 | 73  | 60  | 101 | 138 | 132 | 219 | 0  |  |  |  |  |  |  |  |
| 179.01 | 76 | 0  | 0  | 16 | 42  | 87  | 58  | 147 | 117 | 42  | 17 |  |  |  |  |  |  |  |
| 179.11 | 74 | 0  | 0  | 44 | 66  | 27  | 115 | 172 | 130 | 156 | 8  |  |  |  |  |  |  |  |
| 179.21 | 51 | 11 | 7  | 16 | 64  | 33  | 96  | 126 | 139 | 187 | 17 |  |  |  |  |  |  |  |
| 179.31 | 57 | 0  | 0  | 21 | 74  | 81  | 99  | 344 | 107 | 0   | 15 |  |  |  |  |  |  |  |
| 179.40 | 47 | 5  | 5  | 26 | 46  | 73  | 139 | 143 | 183 | 0   | 12 |  |  |  |  |  |  |  |
| 179.50 | 55 | 0  | 0  | 5  | 39  | 47  | 72  | 373 | 182 | 0   | 5  |  |  |  |  |  |  |  |
| 179.61 | 44 | 14 | 11 | 25 | 82  | 73  | 212 | 157 | 117 | 79  | 14 |  |  |  |  |  |  |  |
| 179.71 | 47 | 0  | 0  | 65 | 61  | 39  | 132 | 180 | 105 | 140 | 0  |  |  |  |  |  |  |  |

|        |    |    |    |    |     |     |     |     |     |     |    |  |  |  |  |  |  |  |
|--------|----|----|----|----|-----|-----|-----|-----|-----|-----|----|--|--|--|--|--|--|--|
| 179.81 | 45 | 10 | 0  | 34 | 95  | 16  | 248 | 225 | 114 | 104 | 0  |  |  |  |  |  |  |  |
| 179.90 | 46 | 19 | 4  | 0  | 65  | 53  | 152 | 208 | 110 | 0   | 16 |  |  |  |  |  |  |  |
| 180.01 | 45 | 18 | 0  | 0  | 69  | 68  | 135 | 228 | 120 | 0   | 23 |  |  |  |  |  |  |  |
| 180.11 | 45 | 5  | 0  | 15 | 51  | 66  | 83  | 206 | 103 | 0   | 16 |  |  |  |  |  |  |  |
| 180.20 | 39 | 8  | 18 | 0  | 96  | 98  | 48  | 208 | 105 | 8   | 0  |  |  |  |  |  |  |  |
| 180.31 | 36 | 20 | 6  | 0  | 91  | 63  | 91  | 36  | 138 | 247 | 0  |  |  |  |  |  |  |  |
| 180.40 | 55 | 10 | 0  | 0  | 130 | 60  | 32  | 89  | 139 | 304 | 5  |  |  |  |  |  |  |  |
| 180.51 | 44 | 10 | 0  | 36 | 60  | 69  | 54  | 88  | 92  | 133 | 0  |  |  |  |  |  |  |  |
| 180.61 | 25 | 5  | 0  | 25 | 71  | 33  | 81  | 81  | 125 | 158 | 19 |  |  |  |  |  |  |  |
| 180.70 | 40 | 0  | 0  | 0  | 88  | 120 | 122 | 131 | 124 | 335 | 9  |  |  |  |  |  |  |  |
| 180.81 | 52 | 0  | 0  | 0  | 63  | 60  | 121 | 114 | 159 | 200 | 0  |  |  |  |  |  |  |  |
| 180.91 | 49 | 6  | 0  | 0  | 48  | 77  | 14  | 0   | 119 | 334 | 25 |  |  |  |  |  |  |  |
| 181.00 | 67 | 6  | 0  | 20 | 85  | 112 | 39  | 133 | 103 | 341 | 21 |  |  |  |  |  |  |  |
| 181.11 | 35 | 13 | 0  | 0  | 29  | 124 | 170 | 213 | 111 | 230 | 6  |  |  |  |  |  |  |  |
| 181.20 | 13 | 6  | 0  | 23 | 78  | 122 | 54  | 57  | 109 | 50  | 18 |  |  |  |  |  |  |  |
| 181.30 | 56 | 0  | 0  | 12 | 46  | 41  | 170 | 142 | 118 | 68  | 23 |  |  |  |  |  |  |  |
| 181.41 | 55 | 0  | 0  | 0  | 84  | 77  | 150 | 98  | 133 | 196 | 19 |  |  |  |  |  |  |  |
| 181.51 | 45 | 0  | 0  | 34 | 86  | 107 | 75  | 107 | 90  | 223 | 13 |  |  |  |  |  |  |  |
| 181.60 | 58 | 0  | 0  | 19 | 114 | 84  | 69  | 248 | 142 | 209 | 0  |  |  |  |  |  |  |  |
| 181.71 | 14 | 0  | 0  | 0  | 34  | 76  | 109 | 35  | 128 | 247 | 16 |  |  |  |  |  |  |  |
| 181.81 | 21 | 11 | 0  | 13 | 72  | 72  | 192 | 96  | 109 | 110 | 10 |  |  |  |  |  |  |  |
| 181.90 | 31 | 5  | 0  | 9  | 110 | 75  | 181 | 138 | 144 | 209 | 0  |  |  |  |  |  |  |  |
| 182.01 | 47 | 28 | 0  | 19 | 80  | 66  | 77  | 201 | 117 | 125 | 0  |  |  |  |  |  |  |  |
| 182.11 | 58 | 0  | 9  | 17 | 86  | 61  | 89  | 138 | 145 | 255 | 0  |  |  |  |  |  |  |  |
| 182.21 | 56 | 14 | 0  | 33 | 74  | 82  | 52  | 161 | 135 | 140 | 0  |  |  |  |  |  |  |  |
| 182.31 | 43 | 0  | 0  | 0  | 42  | 83  | 65  | 144 | 111 | 82  | 8  |  |  |  |  |  |  |  |
| 182.40 | 45 | 14 | 0  | 24 | 55  | 56  | 103 | 183 | 109 | 119 | 5  |  |  |  |  |  |  |  |
| 182.51 | 63 | 13 | 0  | 0  | 93  | 53  | 157 | 125 | 134 | 32  | 0  |  |  |  |  |  |  |  |
| 182.61 | 66 | 6  | 0  | 46 | 59  | 156 | 139 | 39  | 135 | 227 | 12 |  |  |  |  |  |  |  |
| 182.71 | 97 | 14 | 0  | 0  | 99  | 113 | 59  | 163 | 125 | 0   | 14 |  |  |  |  |  |  |  |
| 182.81 | 26 | 7  | 0  | 18 | 108 | 136 | 196 | 241 | 133 | 0   | 34 |  |  |  |  |  |  |  |
| 182.90 | 67 | 21 | 0  | 51 | 31  | 76  | 166 | 220 | 128 | 0   | 13 |  |  |  |  |  |  |  |
| 183.01 | 47 | 0  | 0  | 11 | 80  | 100 | 78  | 238 | 119 | 0   | 34 |  |  |  |  |  |  |  |
| 183.11 | 79 | 28 | 8  | 23 | 61  | 47  | 139 | 239 | 123 | 20  | 21 |  |  |  |  |  |  |  |
| 183.20 | 64 | 32 | 7  | 0  | 48  | 42  | 177 | 209 | 140 | 0   | 5  |  |  |  |  |  |  |  |
| 183.31 | 78 | 0  | 0  | 28 | 79  | 33  | 127 | 176 | 134 | 0   | 7  |  |  |  |  |  |  |  |
| 183.41 | 54 | 0  | 0  | 0  | 70  | 68  | 161 | 117 | 102 | 118 | 23 |  |  |  |  |  |  |  |
| 183.51 | 58 | 12 | 0  | 34 | 23  | 57  | 149 | 138 | 90  | 51  | 19 |  |  |  |  |  |  |  |
| 183.61 | 49 | 11 | 0  | 14 | 93  | 95  | 19  | 84  | 141 | 0   | 26 |  |  |  |  |  |  |  |
| 183.70 | 22 | 0  | 0  | 24 | 70  | 186 | 0   | 142 | 140 | 146 | 17 |  |  |  |  |  |  |  |
| 183.81 | 41 | 11 | 0  | 0  | 90  | 45  | 61  | 64  | 116 | 480 | 45 |  |  |  |  |  |  |  |
| 183.91 | 78 | 19 | 0  | 19 | 95  | 156 | 70  | 102 | 116 | 421 | 0  |  |  |  |  |  |  |  |
| 184.01 | 25 | 0  | 0  | 4  | 56  | 98  | 124 | 0   | 122 | 296 | 8  |  |  |  |  |  |  |  |
| 184.11 | 48 | 0  | 0  | 20 | 72  | 81  | 43  | 21  | 107 | 210 | 0  |  |  |  |  |  |  |  |
| 184.20 | 32 | 0  | 0  | 47 | 81  | 133 | 78  | 24  | 122 | 466 | 0  |  |  |  |  |  |  |  |
| 184.30 | 34 | 0  | 0  | 23 | 92  | 108 | 119 | 96  | 113 | 285 | 0  |  |  |  |  |  |  |  |
| 184.41 | 31 | 4  | 0  | 17 | 74  | 108 | 0   | 52  | 122 | 184 | 15 |  |  |  |  |  |  |  |
| 184.51 | 23 | 0  | 0  | 37 | 83  | 59  | 0   | 105 | 160 | 180 | 24 |  |  |  |  |  |  |  |
| 184.61 | 31 | 0  | 0  | 39 | 35  | 77  | 94  | 20  | 140 | 220 | 9  |  |  |  |  |  |  |  |
| 184.70 | 45 | 0  | 0  | 31 | 35  | 64  | 89  | 65  | 103 | 51  | 10 |  |  |  |  |  |  |  |
| 184.81 | 48 | 0  | 0  | 18 | 47  | 70  | 63  | 73  | 107 | 13  | 0  |  |  |  |  |  |  |  |
| 184.90 | 63 | 0  | 0  | 5  | 38  | 81  | 107 | 95  | 150 | 136 | 9  |  |  |  |  |  |  |  |
| 185.01 | 34 | 8  | 0  | 9  | 50  | 61  | 0   | 72  | 127 | 80  | 20 |  |  |  |  |  |  |  |
| 185.11 | 52 | 6  | 5  | 0  | 53  | 64  | 106 | 96  | 112 | 296 | 0  |  |  |  |  |  |  |  |
| 185.20 | 58 | 0  | 0  | 16 | 70  | 83  | 115 | 77  | 156 | 331 | 11 |  |  |  |  |  |  |  |
| 185.31 | 63 | 0  | 0  | 0  | 74  | 32  | 49  | 93  | 151 | 234 | 17 |  |  |  |  |  |  |  |
| 185.40 | 38 | 0  | 0  | 0  | 83  | 56  | 41  | 113 | 158 | 312 | 0  |  |  |  |  |  |  |  |
| 185.50 | 38 | 0  | 0  | 15 | 56  | 65  | 62  | 184 | 137 | 249 | 0  |  |  |  |  |  |  |  |

|        |    |    |    |    |     |     |     |     |     |     |    |  |  |  |  |  |  |  |
|--------|----|----|----|----|-----|-----|-----|-----|-----|-----|----|--|--|--|--|--|--|--|
| 185.61 | 61 | 13 | 9  | 45 | 48  | 83  | 75  | 113 | 144 | 233 | 0  |  |  |  |  |  |  |  |
| 185.71 | 69 | 10 | 0  | 0  | 39  | 70  | 107 | 205 | 149 | 280 | 0  |  |  |  |  |  |  |  |
| 185.81 | 39 | 0  | 0  | 27 | 39  | 72  | 150 | 142 | 126 | 95  | 13 |  |  |  |  |  |  |  |
| 185.91 | 30 | 7  | 0  | 0  | 30  | 122 | 57  | 106 | 132 | 96  | 17 |  |  |  |  |  |  |  |
| 186.01 | 47 | 9  | 0  | 40 | 94  | 70  | 193 | 102 | 118 | 151 | 29 |  |  |  |  |  |  |  |
| 186.11 | 39 | 0  | 0  | 0  | 0   | 80  | 119 | 111 | 133 | 238 | 10 |  |  |  |  |  |  |  |
| 186.20 | 57 | 0  | 0  | 8  | 66  | 87  | 0   | 198 | 136 | 175 | 15 |  |  |  |  |  |  |  |
| 186.30 | 50 | 0  | 0  | 0  | 65  | 27  | 55  | 245 | 148 | 164 | 16 |  |  |  |  |  |  |  |
| 186.41 | 54 | 10 | 0  | 0  | 99  | 81  | 150 | 188 | 122 | 206 | 7  |  |  |  |  |  |  |  |
| 186.51 | 83 | 0  | 0  | 0  | 54  | 23  | 54  | 101 | 153 | 100 | 0  |  |  |  |  |  |  |  |
| 186.61 | 66 | 8  | 10 | 9  | 91  | 125 | 205 | 152 | 99  | 213 | 26 |  |  |  |  |  |  |  |
| 186.71 | 46 | 0  | 0  | 29 | 56  | 77  | 122 | 195 | 132 | 156 | 8  |  |  |  |  |  |  |  |
| 186.80 | 69 | 11 | 13 | 13 | 61  | 45  | 182 | 56  | 95  | 43  | 29 |  |  |  |  |  |  |  |
| 186.90 | 74 | 6  | 5  | 29 | 131 | 46  | 166 | 162 | 92  | 0   | 23 |  |  |  |  |  |  |  |
| 187.01 | 47 | 12 | 0  | 17 | 59  | 59  | 64  | 193 | 119 | 0   | 0  |  |  |  |  |  |  |  |
| 187.10 | 71 | 30 | 19 | 0  | 31  | 55  | 84  | 321 | 109 | 220 | 0  |  |  |  |  |  |  |  |
| 187.21 | 42 | 0  | 0  | 12 | 63  | 57  | 97  | 183 | 90  | 40  | 4  |  |  |  |  |  |  |  |
| 187.30 | 44 | 6  | 0  | 0  | 65  | 138 | 108 | 205 | 111 | 159 | 22 |  |  |  |  |  |  |  |
| 187.41 | 48 | 15 | 24 | 6  | 54  | 64  | 22  | 114 | 104 | 62  | 12 |  |  |  |  |  |  |  |
| 187.51 | 61 | 7  | 0  | 17 | 68  | 46  | 25  | 61  | 129 | 193 | 10 |  |  |  |  |  |  |  |
| 187.61 | 50 | 0  | 0  | 41 | 74  | 96  | 13  | 0   | 89  | 240 | 0  |  |  |  |  |  |  |  |
| 187.71 | 37 | 5  | 0  | 26 | 67  | 95  | 52  | 81  | 119 | 103 | 0  |  |  |  |  |  |  |  |
| 187.81 | 20 | 0  | 0  | 0  | 57  | 90  | 28  | 80  | 92  | 313 | 0  |  |  |  |  |  |  |  |
| 187.91 | 38 | 0  | 0  | 19 | 99  | 135 | 111 | 26  | 136 | 365 | 27 |  |  |  |  |  |  |  |
| 188.00 | 53 | 0  | 0  | 14 | 107 | 76  | 0   | 51  | 98  | 194 | 19 |  |  |  |  |  |  |  |
| 188.11 | 63 | 13 | 10 | 51 | 58  | 106 | 75  | 161 | 128 | 377 | 21 |  |  |  |  |  |  |  |
| 188.21 | 41 | 0  | 0  | 30 | 102 | 122 | 40  | 125 | 138 | 343 | 9  |  |  |  |  |  |  |  |
| 188.31 | 51 | 8  | 0  | 66 | 89  | 85  | 40  | 103 | 130 | 280 | 29 |  |  |  |  |  |  |  |
| 188.41 | 50 | 0  | 0  | 24 | 68  | 131 | 87  | 6   | 101 | 301 | 0  |  |  |  |  |  |  |  |
| 188.50 | 65 | 0  | 0  | 14 | 67  | 56  | 75  | 91  | 132 | 255 | 13 |  |  |  |  |  |  |  |
| 188.61 | 33 | 8  | 0  | 0  | 66  | 116 | 0   | 123 | 100 | 254 | 0  |  |  |  |  |  |  |  |
| 188.71 | 64 | 0  | 9  | 7  | 108 | 71  | 189 | 102 | 128 | 52  | 0  |  |  |  |  |  |  |  |
| 188.80 | 44 | 0  | 0  | 0  | 83  | 69  | 102 | 12  | 115 | 285 | 0  |  |  |  |  |  |  |  |
| 188.91 | 53 | 8  | 0  | 13 | 39  | 124 | 125 | 127 | 125 | 148 | 33 |  |  |  |  |  |  |  |
| 189.01 | 66 | 0  | 0  | 0  | 71  | 122 | 85  | 78  | 124 | 207 | 5  |  |  |  |  |  |  |  |
| 189.10 | 46 | 0  | 0  | 9  | 46  | 40  | 72  | 56  | 123 | 148 | 31 |  |  |  |  |  |  |  |
| 189.21 | 61 | 6  | 0  | 13 | 106 | 100 | 163 | 133 | 140 | 133 | 27 |  |  |  |  |  |  |  |
| 189.31 | 59 | 0  | 0  | 0  | 88  | 100 | 100 | 74  | 119 | 270 | 8  |  |  |  |  |  |  |  |
| 189.40 | 44 | 5  | 13 | 11 | 83  | 90  | 83  | 110 | 104 | 181 | 20 |  |  |  |  |  |  |  |
| 189.51 | 40 | 0  | 0  | 29 | 98  | 88  | 76  | 62  | 126 | 172 | 19 |  |  |  |  |  |  |  |
| 189.61 | 55 | 23 | 12 | 21 | 45  | 109 | 69  | 143 | 127 | 238 | 0  |  |  |  |  |  |  |  |
| 189.71 | 54 | 35 | 16 | 31 | 77  | 30  | 35  | 150 | 105 | 165 | 0  |  |  |  |  |  |  |  |
| 189.81 | 43 | 7  | 15 | 5  | 47  | 103 | 66  | 189 | 111 | 111 | 5  |  |  |  |  |  |  |  |
| 189.91 | 28 | 16 | 11 | 0  | 13  | 143 | 79  | 144 | 137 | 109 | 31 |  |  |  |  |  |  |  |
| 190.01 | 44 | 0  | 0  | 0  | 71  | 21  | 64  | 331 | 94  | 0   | 0  |  |  |  |  |  |  |  |
| 190.11 | 67 | 23 | 6  | 7  | 11  | 51  | 62  | 274 | 98  | 77  | 14 |  |  |  |  |  |  |  |
| 190.21 | 36 | 0  | 0  | 8  | 37  | 109 | 26  | 267 | 114 | 133 | 0  |  |  |  |  |  |  |  |
| 190.30 | 58 | 16 | 0  | 5  | 29  | 53  | 111 | 154 | 141 | 0   | 0  |  |  |  |  |  |  |  |
| 190.41 | 53 | 7  | 0  | 32 | 85  | 89  | 72  | 188 | 99  | 65  | 7  |  |  |  |  |  |  |  |
| 190.51 | 28 | 5  | 0  | 13 | 80  | 53  | 0   | 57  | 97  | 341 | 5  |  |  |  |  |  |  |  |
| 190.60 | 39 | 12 | 0  | 39 | 73  | 117 | 0   | 52  | 91  | 160 | 12 |  |  |  |  |  |  |  |
| 190.71 | 43 | 0  | 5  | 42 | 70  | 132 | 83  | 75  | 122 | 196 | 12 |  |  |  |  |  |  |  |
| 190.80 | 56 | 0  | 0  | 0  | 84  | 77  | 128 | 25  | 97  | 181 | 7  |  |  |  |  |  |  |  |
| 190.90 | 35 | 0  | 0  | 27 | 109 | 131 | 113 | 30  | 113 | 369 | 0  |  |  |  |  |  |  |  |
| 191.01 | 46 | 0  | 0  | 0  | 58  | 119 | 56  | 17  | 115 | 332 | 23 |  |  |  |  |  |  |  |
| 191.10 | 32 | 0  | 0  | 0  | 137 | 99  | 118 | 31  | 128 | 373 | 14 |  |  |  |  |  |  |  |
| 191.21 | 53 | 21 | 0  | 33 | 65  | 127 | 85  | 51  | 91  | 320 | 9  |  |  |  |  |  |  |  |
| 191.31 | 31 | 0  | 0  | 0  | 96  | 90  | 0   | 63  | 91  | 416 | 0  |  |  |  |  |  |  |  |

|        |    |    |    |    |     |     |     |     |     |     |    |  |  |  |  |  |  |  |
|--------|----|----|----|----|-----|-----|-----|-----|-----|-----|----|--|--|--|--|--|--|--|
| 191.41 | 31 | 0  | 0  | 0  | 22  | 100 | 150 | 0   | 112 | 286 | 4  |  |  |  |  |  |  |  |
| 191.51 | 61 | 18 | 0  | 30 | 60  | 98  | 136 | 30  | 122 | 326 | 0  |  |  |  |  |  |  |  |
| 191.61 | 29 | 0  | 0  | 0  | 84  | 115 | 93  | 38  | 134 | 353 | 0  |  |  |  |  |  |  |  |
| 191.71 | 48 | 0  | 0  | 17 | 0   | 73  | 137 | 66  | 96  | 293 | 0  |  |  |  |  |  |  |  |
| 191.81 | 45 | 0  | 0  | 34 | 51  | 105 | 119 | 86  | 137 | 176 | 15 |  |  |  |  |  |  |  |
| 191.90 | 45 | 5  | 0  | 13 | 153 | 114 | 84  | 71  | 116 | 240 | 32 |  |  |  |  |  |  |  |
| 192.01 | 40 | 20 | 8  | 31 | 117 | 156 | 24  | 0   | 100 | 146 | 8  |  |  |  |  |  |  |  |
| 192.11 | 61 | 9  | 0  | 7  | 104 | 98  | 123 | 151 | 104 | 293 | 6  |  |  |  |  |  |  |  |
| 192.21 | 63 | 0  | 0  | 0  | 42  | 61  | 91  | 226 | 97  | 133 | 17 |  |  |  |  |  |  |  |
| 192.31 | 57 | 0  | 0  | 0  | 63  | 100 | 81  | 120 | 135 | 204 | 0  |  |  |  |  |  |  |  |
| 192.41 | 46 | 6  | 0  | 10 | 65  | 71  | 194 | 169 | 95  | 46  | 0  |  |  |  |  |  |  |  |
| 192.51 | 33 | 7  | 0  | 52 | 78  | 78  | 131 | 129 | 128 | 247 | 24 |  |  |  |  |  |  |  |
| 192.60 | 62 | 12 | 0  | 41 | 41  | 62  | 86  | 140 | 105 | 47  | 0  |  |  |  |  |  |  |  |
| 192.71 | 67 | 0  | 20 | 0  | 102 | 69  | 109 | 194 | 82  | 144 | 12 |  |  |  |  |  |  |  |
| 192.81 | 67 | 0  | 0  | 0  | 103 | 64  | 25  | 121 | 103 | 130 | 22 |  |  |  |  |  |  |  |
| 192.91 | 39 | 6  | 0  | 0  | 95  | 87  | 158 | 34  | 84  | 49  | 12 |  |  |  |  |  |  |  |
| 193.01 | 47 | 0  | 0  | 0  | 19  | 91  | 116 | 112 | 102 | 137 | 0  |  |  |  |  |  |  |  |
| 193.10 | 38 | 19 | 5  | 49 | 80  | 53  | 119 | 147 | 94  | 0   | 0  |  |  |  |  |  |  |  |
| 193.21 | 76 | 28 | 0  | 0  | 29  | 127 | 151 | 257 | 120 | 0   | 0  |  |  |  |  |  |  |  |
| 193.31 | 62 | 28 | 12 | 10 | 44  | 71  | 73  | 304 | 105 | 8   | 0  |  |  |  |  |  |  |  |
| 193.40 | 76 | 22 | 16 | 7  | 66  | 95  | 163 | 153 | 104 | 0   | 15 |  |  |  |  |  |  |  |
| 193.51 | 42 | 7  | 15 | 12 | 47  | 69  | 104 | 165 | 79  | 0   | 10 |  |  |  |  |  |  |  |
| 193.60 | 64 | 19 | 4  | 0  | 71  | 94  | 0   | 170 | 73  | 0   | 17 |  |  |  |  |  |  |  |
| 193.70 | 70 | 0  | 0  | 12 | 72  | 56  | 70  | 283 | 101 | 0   | 0  |  |  |  |  |  |  |  |
| 193.81 | 44 | 0  | 10 | 0  | 25  | 56  | 37  | 31  | 101 | 123 | 0  |  |  |  |  |  |  |  |
| 193.91 | 57 | 0  | 0  | 19 | 110 | 103 | 142 | 5   | 115 | 451 | 19 |  |  |  |  |  |  |  |
| 194.01 | 59 | 0  | 0  | 0  | 118 | 143 | 79  | 150 | 92  | 103 | 8  |  |  |  |  |  |  |  |
| 194.11 | 35 | 0  | 0  | 15 | 60  | 100 | 105 | 85  | 105 | 390 | 0  |  |  |  |  |  |  |  |
| 194.21 | 19 | 8  | 0  | 21 | 156 | 109 | 13  | 122 | 99  | 162 | 0  |  |  |  |  |  |  |  |
| 194.31 | 51 | 20 | 0  | 40 | 86  | 79  | 19  | 32  | 113 | 428 | 10 |  |  |  |  |  |  |  |
| 194.41 | 65 | 0  | 0  | 0  | 89  | 106 | 46  | 0   | 121 | 465 | 11 |  |  |  |  |  |  |  |
| 194.50 | 14 | 0  | 0  | 48 | 95  | 118 | 0   | 42  | 79  | 103 | 29 |  |  |  |  |  |  |  |
| 194.61 | 18 | 0  | 0  | 25 | 95  | 109 | 0   | 36  | 82  | 198 | 34 |  |  |  |  |  |  |  |
| 194.70 | 16 | 0  | 0  | 29 | 57  | 82  | 38  | 125 | 97  | 173 | 0  |  |  |  |  |  |  |  |
| 194.80 | 50 | 9  | 0  | 30 | 98  | 77  | 48  | 84  | 75  | 328 | 0  |  |  |  |  |  |  |  |
| 194.90 | 40 | 16 | 0  | 14 | 39  | 107 | 6   | 54  | 76  | 233 | 13 |  |  |  |  |  |  |  |
| 195.00 | 58 | 0  | 0  | 16 | 52  | 49  | 59  | 94  | 87  | 342 | 17 |  |  |  |  |  |  |  |
| 195.10 | 79 | 0  | 0  | 55 | 81  | 121 | 59  | 138 | 91  | 145 | 13 |  |  |  |  |  |  |  |
| 195.21 | 59 | 0  | 0  | 0  | 92  | 134 | 211 | 131 | 103 | 118 | 12 |  |  |  |  |  |  |  |
| 195.30 | 43 | 0  | 0  | 0  | 63  | 67  | 190 | 175 | 52  | 200 | 0  |  |  |  |  |  |  |  |
| 195.40 | 43 | 0  | 0  | 7  | 51  | 86  | 143 | 131 | 82  | 370 | 10 |  |  |  |  |  |  |  |
| 195.50 | 38 | 0  | 0  | 70 | 26  | 84  | 236 | 124 | 108 | 240 | 0  |  |  |  |  |  |  |  |
| 195.60 | 17 | 0  | 0  | 0  | 59  | 116 | 107 | 167 | 118 | 214 | 0  |  |  |  |  |  |  |  |
| 195.70 | 61 | 10 | 0  | 8  | 65  | 98  | 147 | 159 | 76  | 0   | 22 |  |  |  |  |  |  |  |
| 195.81 | 55 | 23 | 0  | 17 | 68  | 47  | 133 | 126 | 79  | 0   | 16 |  |  |  |  |  |  |  |
| 195.90 | 65 | 0  | 9  | 0  | 0   | 60  | 118 | 260 | 89  | 0   | 0  |  |  |  |  |  |  |  |
| 196.01 | 41 | 6  | 4  | 6  | 17  | 71  | 116 | 228 | 74  | 56  | 0  |  |  |  |  |  |  |  |
| 196.10 | 78 | 0  | 0  | 0  | 58  | 51  | 174 | 360 | 86  | 7   | 0  |  |  |  |  |  |  |  |
| 196.21 | 33 | 18 | 10 | 10 | 13  | 51  | 74  | 133 | 91  | 132 | 7  |  |  |  |  |  |  |  |
| 196.30 | 64 | 29 | 7  | 0  | 62  | 32  | 23  | 156 | 82  | 254 | 18 |  |  |  |  |  |  |  |
| 196.41 | 67 | 0  | 0  | 0  | 138 | 51  | 104 | 0   | 57  | 137 | 4  |  |  |  |  |  |  |  |
| 196.50 | 61 | 0  | 0  | 51 | 67  | 88  | 9   | 19  | 69  | 147 | 21 |  |  |  |  |  |  |  |
| 196.60 | 12 | 0  | 0  | 0  | 76  | 79  | 40  | 104 | 74  | 294 | 0  |  |  |  |  |  |  |  |
| 196.70 | 57 | 0  | 0  | 27 | 86  | 112 | 80  | 92  | 88  | 204 | 10 |  |  |  |  |  |  |  |
| 196.81 | 48 | 0  | 0  | 25 | 73  | 105 | 58  | 115 | 88  | 389 | 12 |  |  |  |  |  |  |  |
| 196.91 | 45 | 18 | 0  | 0  | 30  | 104 | 125 | 79  | 66  | 61  | 0  |  |  |  |  |  |  |  |
| 197.00 | 72 | 22 | 23 | 0  | 85  | 71  | 175 | 108 | 74  | 191 | 21 |  |  |  |  |  |  |  |
| 197.11 | 32 | 0  | 0  | 0  | 96  | 104 | 108 | 125 | 83  | 243 | 0  |  |  |  |  |  |  |  |

|        |    |    |    |    |     |     |     |     |     |     |    |  |  |  |  |  |  |  |
|--------|----|----|----|----|-----|-----|-----|-----|-----|-----|----|--|--|--|--|--|--|--|
| 197.21 | 51 | 16 | 0  | 0  | 91  | 92  | 67  | 54  | 83  | 337 | 23 |  |  |  |  |  |  |  |
| 197.31 | 76 | 17 | 6  | 0  | 88  | 119 | 73  | 173 | 59  | 154 | 34 |  |  |  |  |  |  |  |
| 197.40 | 41 | 11 | 0  | 10 | 145 | 101 | 126 | 76  | 51  | 231 | 7  |  |  |  |  |  |  |  |
| 197.51 | 68 | 14 | 0  | 10 | 35  | 32  | 108 | 261 | 87  | 73  | 0  |  |  |  |  |  |  |  |
| 197.61 | 83 | 17 | 0  | 21 | 10  | 57  | 175 | 275 | 69  | 0   | 14 |  |  |  |  |  |  |  |
| 197.71 | 57 | 25 | 14 | 25 | 41  | 86  | 48  | 296 | 63  | 0   | 18 |  |  |  |  |  |  |  |
| 197.81 | 67 | 0  | 10 | 28 | 40  | 58  | 28  | 197 | 61  | 0   | 0  |  |  |  |  |  |  |  |
| 197.90 | 54 | 24 | 8  | 0  | 41  | 46  | 82  | 182 | 74  | 250 | 20 |  |  |  |  |  |  |  |
| 198.01 | 35 | 15 | 0  | 28 | 24  | 38  | 86  | 199 | 54  | 25  | 32 |  |  |  |  |  |  |  |
| 198.10 | 65 | 0  | 0  | 31 | 94  | 73  | 56  | 22  | 47  | 338 | 8  |  |  |  |  |  |  |  |
| 198.21 | 28 | 7  | 0  | 28 | 45  | 73  | 80  | 58  | 53  | 354 | 4  |  |  |  |  |  |  |  |
| 198.31 | 31 | 0  | 0  | 30 | 81  | 103 | 68  | 44  | 69  | 318 | 0  |  |  |  |  |  |  |  |
| 198.40 | 23 | 0  | 0  | 35 | 67  | 116 | 68  | 40  | 63  | 451 | 16 |  |  |  |  |  |  |  |
| 198.50 | 48 | 0  | 0  | 0  | 56  | 80  | 86  | 93  | 61  | 257 | 29 |  |  |  |  |  |  |  |
| 198.61 | 46 | 0  | 0  | 29 | 107 | 174 | 68  | 44  | 92  | 161 | 0  |  |  |  |  |  |  |  |
| 198.71 | 12 | 0  | 0  | 5  | 85  | 75  | 5   | 43  | 66  | 227 | 0  |  |  |  |  |  |  |  |
| 198.80 | 66 | 0  | 17 | 0  | 92  | 95  | 52  | 118 | 46  | 187 | 0  |  |  |  |  |  |  |  |
| 198.90 | 40 | 0  | 0  | 24 | 61  | 82  | 114 | 45  | 55  | 381 | 32 |  |  |  |  |  |  |  |
| 199.01 | 42 | 16 | 0  | 0  | 90  | 66  | 0   | 102 | 55  | 191 | 0  |  |  |  |  |  |  |  |
| 199.10 | 52 | 0  | 12 | 49 | 87  | 107 | 43  | 126 | 75  | 243 | 17 |  |  |  |  |  |  |  |
| 199.21 | 62 | 0  | 0  | 8  | 45  | 61  | 36  | 237 | 77  | 131 | 14 |  |  |  |  |  |  |  |
| 199.31 | 71 | 0  | 20 | 18 | 57  | 67  | 148 | 33  | 68  | 241 | 9  |  |  |  |  |  |  |  |
| 199.41 | 60 | 0  | 0  | 5  | 78  | 77  | 54  | 196 | 53  | 86  | 16 |  |  |  |  |  |  |  |
| 199.51 | 50 | 30 | 15 | 17 | 90  | 104 | 201 | 105 | 70  | 143 | 45 |  |  |  |  |  |  |  |
| 199.60 | 42 | 7  | 0  | 0  | 51  | 81  | 68  | 309 | 65  | 0   | 5  |  |  |  |  |  |  |  |
| 199.71 | 60 | 15 | 10 | 58 | 60  | 64  | 97  | 262 | 80  | 0   | 9  |  |  |  |  |  |  |  |
| 199.81 | 68 | 0  | 8  | 19 | 57  | 94  | 132 | 352 | 66  | 0   | 7  |  |  |  |  |  |  |  |
| 199.90 | 54 | 21 | 12 | 0  | 23  | 77  | 61  | 220 | 66  | 0   | 0  |  |  |  |  |  |  |  |
| 200.01 | 45 | 30 | 0  | 43 | 27  | 118 | 87  | 207 | 73  | 72  | 5  |  |  |  |  |  |  |  |
| 200.11 | 34 | 0  | 0  | 33 | 110 | 76  | 39  | 85  | 59  | 0   | 10 |  |  |  |  |  |  |  |
| 200.21 | 58 | 0  | 0  | 19 | 98  | 51  | 21  | 41  | 63  | 353 | 9  |  |  |  |  |  |  |  |
| 200.31 | 40 | 0  | 0  | 4  | 97  | 101 | 12  | 49  | 70  | 236 | 12 |  |  |  |  |  |  |  |
| 200.40 | 46 | 0  | 0  | 14 | 76  | 107 | 59  | 73  | 87  | 344 | 9  |  |  |  |  |  |  |  |
| 200.51 | 57 | 9  | 0  | 20 | 102 | 116 | 81  | 8   | 90  | 241 | 0  |  |  |  |  |  |  |  |
| 200.61 | 28 | 0  | 0  | 32 | 43  | 147 | 99  | 24  | 106 | 273 | 8  |  |  |  |  |  |  |  |
| 200.70 | 50 | 5  | 12 | 15 | 53  | 130 | 44  | 77  | 53  | 235 | 8  |  |  |  |  |  |  |  |
| 200.81 | 69 | 29 | 0  | 14 | 47  | 59  | 50  | 36  | 56  | 497 | 0  |  |  |  |  |  |  |  |
| 200.91 | 44 | 0  | 0  | 12 | 98  | 105 | 45  | 103 | 73  | 186 | 28 |  |  |  |  |  |  |  |
| 201.00 | 13 | 0  | 0  | 35 | 110 | 50  | 63  | 36  | 84  | 242 | 14 |  |  |  |  |  |  |  |
| 201.11 | 50 | 0  | 0  | 36 | 136 | 96  | 149 | 78  | 67  | 284 | 0  |  |  |  |  |  |  |  |
| 201.21 | 51 | 0  | 8  | 0  | 95  | 101 | 94  | 66  | 60  | 288 | 0  |  |  |  |  |  |  |  |
| 201.31 | 29 | 0  | 0  | 4  | 54  | 124 | 236 | 110 | 61  | 228 | 35 |  |  |  |  |  |  |  |
| 201.40 | 33 | 9  | 10 | 44 | 72  | 114 | 52  | 117 | 55  | 38  | 27 |  |  |  |  |  |  |  |
| 201.50 | 54 | 8  | 11 | 14 | 47  | 109 | 179 | 187 | 69  | 56  | 0  |  |  |  |  |  |  |  |
| 201.61 | 71 | 8  | 0  | 25 | 106 | 73  | 150 | 151 | 50  | 14  | 0  |  |  |  |  |  |  |  |
| 201.71 | 69 | 22 | 15 | 13 | 39  | 65  | 191 | 161 | 81  | 73  | 0  |  |  |  |  |  |  |  |
| 201.80 | 61 | 14 | 0  | 9  | 61  | 85  | 134 | 281 | 46  | 0   | 19 |  |  |  |  |  |  |  |
| 201.90 | 58 | 0  | 0  | 0  | 37  | 114 | 211 | 217 | 75  | 0   | 9  |  |  |  |  |  |  |  |
| 202.01 | 62 | 0  | 0  | 22 | 62  | 99  | 66  | 192 | 49  | 0   | 39 |  |  |  |  |  |  |  |
| 202.10 | 66 | 0  | 0  | 12 | 18  | 78  | 92  | 192 | 51  | 251 | 0  |  |  |  |  |  |  |  |
| 202.21 | 46 | 0  | 0  | 0  | 45  | 10  | 48  | 106 | 28  | 270 | 0  |  |  |  |  |  |  |  |
| 202.31 | 29 | 9  | 0  | 52 | 70  | 95  | 105 | 66  | 67  | 315 | 12 |  |  |  |  |  |  |  |
| 202.41 | 57 | 0  | 0  | 20 | 104 | 104 | 42  | 136 | 60  | 283 | 13 |  |  |  |  |  |  |  |
| 202.51 | 50 | 0  | 0  | 0  | 15  | 33  | 88  | 68  | 40  | 479 | 9  |  |  |  |  |  |  |  |
| 202.60 | 30 | 0  | 0  | 0  | 56  | 79  | 53  | 89  | 63  | 316 | 0  |  |  |  |  |  |  |  |
| 202.70 | 53 | 0  | 0  | 0  | 53  | 85  | 0   | 27  | 109 | 117 | 0  |  |  |  |  |  |  |  |
| 202.81 | 33 | 8  | 0  | 20 | 89  | 73  | 104 | 42  | 50  | 109 | 0  |  |  |  |  |  |  |  |
| 202.90 | 68 | 0  | 0  | 0  | 52  | 104 | 115 | 239 | 63  | 72  | 23 |  |  |  |  |  |  |  |

|        |    |    |    |    |     |     |     |     |     |     |    |  |  |  |  |  |  |  |
|--------|----|----|----|----|-----|-----|-----|-----|-----|-----|----|--|--|--|--|--|--|--|
| 203.00 | 57 | 11 | 18 | 32 | 33  | 69  | 137 | 203 | 56  | 0   | 18 |  |  |  |  |  |  |  |
| 203.11 | 50 | 29 | 0  | 19 | 0   | 77  | 165 | 224 | 60  | 0   | 0  |  |  |  |  |  |  |  |
| 203.21 | 60 | 0  | 0  | 0  | 119 | 87  | 45  | 57  | 79  | 152 | 8  |  |  |  |  |  |  |  |
| 203.30 | 35 | 0  | 0  | 0  | 34  | 85  | 241 | 54  | 70  | 229 | 9  |  |  |  |  |  |  |  |
| 203.41 | 19 | 6  | 0  | 13 | 59  | 41  | 130 | 76  | 67  | 313 | 0  |  |  |  |  |  |  |  |
| 203.51 | 48 | 0  | 9  | 34 | 117 | 110 | 30  | 152 | 71  | 423 | 0  |  |  |  |  |  |  |  |
| 203.60 | 41 | 0  | 0  | 29 | 48  | 89  | 147 | 87  | 70  | 248 | 28 |  |  |  |  |  |  |  |
| 203.70 | 54 | 8  | 0  | 29 | 102 | 71  | 133 | 104 | 76  | 451 | 26 |  |  |  |  |  |  |  |
| 203.80 | 16 | 0  | 0  | 35 | 31  | 68  | 75  | 35  | 80  | 287 | 9  |  |  |  |  |  |  |  |
| 203.91 | 48 | 4  | 0  | 44 | 49  | 114 | 22  | 21  | 34  | 403 | 15 |  |  |  |  |  |  |  |
| 204.00 | 25 | 0  | 0  | 12 | 89  | 82  | 110 | 86  | 71  | 244 | 11 |  |  |  |  |  |  |  |
| 204.11 | 36 | 0  | 0  | 22 | 95  | 99  | 194 | 0   | 89  | 395 | 0  |  |  |  |  |  |  |  |
| 204.20 | 59 | 17 | 0  | 0  | 95  | 129 | 53  | 135 | 48  | 111 | 22 |  |  |  |  |  |  |  |
| 204.31 | 62 | 18 | 0  | 0  | 65  | 70  | 115 | 142 | 60  | 272 | 0  |  |  |  |  |  |  |  |
| 204.40 | 20 | 0  | 0  | 26 | 54  | 67  | 52  | 142 | 44  | 216 | 51 |  |  |  |  |  |  |  |
| 204.51 | 58 | 7  | 0  | 8  | 53  | 5   | 54  | 142 | 71  | 0   | 11 |  |  |  |  |  |  |  |
| 204.60 | 56 | 0  | 0  | 0  | 44  | 119 | 127 | 125 | 75  | 81  | 5  |  |  |  |  |  |  |  |
| 204.71 | 54 | 13 | 14 | 7  | 0   | 0   | 116 | 213 | 68  | 0   | 17 |  |  |  |  |  |  |  |
| 204.81 | 39 | 6  | 0  | 0  | 0   | 0   | 122 | 213 | 59  | 0   | 26 |  |  |  |  |  |  |  |
| 204.90 | 47 | 11 | 0  | 0  | 55  | 90  | 179 | 269 | 51  | 0   | 48 |  |  |  |  |  |  |  |
| 205.00 | 51 | 16 | 11 | 17 | 0   | 52  | 113 | 210 | 55  | 0   | 0  |  |  |  |  |  |  |  |
| 205.11 | 76 | 34 | 33 | 0  | 86  | 39  | 0   | 197 | 90  | 0   | 7  |  |  |  |  |  |  |  |
| 205.21 | 43 | 7  | 0  | 25 | 72  | 56  | 57  | 235 | 47  | 15  | 0  |  |  |  |  |  |  |  |
| 205.31 | 32 | 0  | 0  | 0  | 87  | 103 | 58  | 9   | 50  | 109 | 0  |  |  |  |  |  |  |  |
| 205.41 | 33 | 0  | 0  | 17 | 74  | 109 | 23  | 0   | 17  | 253 | 17 |  |  |  |  |  |  |  |
| 205.50 | 34 | 0  | 0  | 0  | 60  | 59  | 0   | 57  | 72  | 347 | 20 |  |  |  |  |  |  |  |
| 205.61 | 39 | 14 | 5  | 0  | 103 | 68  | 29  | 8   | 55  | 213 | 0  |  |  |  |  |  |  |  |
| 205.70 | 21 | 0  | 0  | 0  | 120 | 123 | 151 | 0   | 58  | 196 | 0  |  |  |  |  |  |  |  |
| 205.80 | 27 | 0  | 0  | 26 | 65  | 64  | 55  | 0   | 70  | 377 | 0  |  |  |  |  |  |  |  |
| 205.91 | 34 | 0  | 0  | 41 | 115 | 99  | 174 | 9   | 47  | 219 | 0  |  |  |  |  |  |  |  |
| 206.01 | 29 | 0  | 0  | 0  | 75  | 72  | 124 | 39  | 67  | 296 | 22 |  |  |  |  |  |  |  |
| 206.11 | 32 | 0  | 0  | 0  | 80  | 116 | 77  | 106 | 60  | 377 | 18 |  |  |  |  |  |  |  |
| 206.21 | 28 | 0  | 0  | 0  | 78  | 72  | 89  | 55  | 85  | 218 | 11 |  |  |  |  |  |  |  |
| 206.31 | 33 | 0  | 5  | 27 | 124 | 76  | 104 | 101 | 34  | 132 | 19 |  |  |  |  |  |  |  |
| 206.41 | 56 | 0  | 0  | 0  | 25  | 150 | 0   | 58  | 88  | 56  | 28 |  |  |  |  |  |  |  |
| 206.51 | 60 | 18 | 0  | 7  | 93  | 140 | 77  | 0   | 87  | 416 | 16 |  |  |  |  |  |  |  |
| 206.61 | 49 | 0  | 13 | 10 | 46  | 57  | 46  | 64  | 79  | 295 | 0  |  |  |  |  |  |  |  |
| 206.71 | 66 | 0  | 0  | 27 | 122 | 58  | 107 | 222 | 58  | 170 | 5  |  |  |  |  |  |  |  |
| 206.80 | 55 | 9  | 8  | 9  | 15  | 60  | 174 | 249 | 56  | 31  | 0  |  |  |  |  |  |  |  |
| 206.90 | 34 | 30 | 0  | 11 | 0   | 34  | 89  | 231 | 56  | 0   | 0  |  |  |  |  |  |  |  |
| 207.00 | 59 | 12 | 9  | 9  | 23  | 56  | 93  | 329 | 62  | 0   | 0  |  |  |  |  |  |  |  |
| 207.10 | 49 | 0  | 0  | 0  | 65  | 52  | 172 | 283 | 62  | 27  | 0  |  |  |  |  |  |  |  |
| 207.21 | 51 | 6  | 0  | 0  | 99  | 62  | 51  | 59  | 59  | 245 | 7  |  |  |  |  |  |  |  |
| 207.31 | 13 | 14 | 0  | 24 | 61  | 47  | 0   | 0   | 55  | 297 | 19 |  |  |  |  |  |  |  |
| 207.41 | 61 | 0  | 0  | 19 | 70  | 109 | 139 | 122 | 73  | 269 | 8  |  |  |  |  |  |  |  |
| 207.51 | 18 | 0  | 0  | 17 | 74  | 82  | 193 | 115 | 61  | 174 | 0  |  |  |  |  |  |  |  |
| 207.60 | 37 | 0  | 0  | 19 | 82  | 70  | 0   | 190 | 50  | 328 | 0  |  |  |  |  |  |  |  |
| 207.70 | 36 | 0  | 0  | 22 | 124 | 77  | 109 | 162 | 55  | 345 | 0  |  |  |  |  |  |  |  |
| 207.81 | 46 | 9  | 0  | 32 | 143 | 60  | 110 | 171 | 51  | 171 | 25 |  |  |  |  |  |  |  |
| 207.90 | 40 | 5  | 7  | 0  | 124 | 102 | 85  | 43  | 55  | 111 | 19 |  |  |  |  |  |  |  |
| 208.00 | 41 | 0  | 0  | 0  | 58  | 63  | 103 | 45  | 59  | 239 | 35 |  |  |  |  |  |  |  |
| 208.10 | 60 | 4  | 0  | 25 | 30  | 101 | 141 | 103 | 72  | 0   | 8  |  |  |  |  |  |  |  |
| 208.21 | 55 | 17 | 23 | 56 | 119 | 54  | 125 | 137 | 99  | 177 | 8  |  |  |  |  |  |  |  |
| 208.31 | 63 | 29 | 10 | 18 | 23  | 48  | 154 | 293 | 106 | 49  | 18 |  |  |  |  |  |  |  |
| 208.40 | 49 | 18 | 0  | 38 | 47  | 28  | 256 | 228 | 67  | 0   | 23 |  |  |  |  |  |  |  |
| 208.51 | 53 | 0  | 0  | 0  | 150 | 82  | 177 | 356 | 61  | 0   | 0  |  |  |  |  |  |  |  |
| 208.61 | 37 | 9  | 0  | 0  | 17  | 67  | 106 | 161 | 43  | 16  | 35 |  |  |  |  |  |  |  |
| 208.70 | 56 | 0  | 0  | 18 | 63  | 73  | 151 | 56  | 57  | 119 | 22 |  |  |  |  |  |  |  |

|        |    |    |    |    |     |     |     |     |     |     |    |  |  |  |  |  |  |  |
|--------|----|----|----|----|-----|-----|-----|-----|-----|-----|----|--|--|--|--|--|--|--|
| 208.81 | 49 | 0  | 0  | 8  | 78  | 133 | 51  | 137 | 29  | 181 | 14 |  |  |  |  |  |  |  |
| 208.91 | 48 | 0  | 0  | 0  | 105 | 138 | 116 | 60  | 94  | 312 | 6  |  |  |  |  |  |  |  |
| 209.01 | 50 | 0  | 0  | 9  | 56  | 99  | 108 | 74  | 101 | 331 | 24 |  |  |  |  |  |  |  |
| 209.11 | 65 | 0  | 0  | 8  | 75  | 117 | 80  | 0   | 58  | 315 | 15 |  |  |  |  |  |  |  |
| 209.21 | 32 | 0  | 0  | 0  | 109 | 141 | 33  | 96  | 86  | 449 | 19 |  |  |  |  |  |  |  |
| 209.31 | 53 | 6  | 0  | 8  | 94  | 137 | 122 | 75  | 84  | 325 | 11 |  |  |  |  |  |  |  |
| 209.40 | 53 | 8  | 0  | 42 | 101 | 102 | 0   | 34  | 88  | 310 | 26 |  |  |  |  |  |  |  |
| 209.51 | 22 | 0  | 0  | 29 | 138 | 127 | 241 | 75  | 79  | 245 | 0  |  |  |  |  |  |  |  |
| 209.60 | 57 | 4  | 0  | 31 | 64  | 127 | 109 | 127 | 94  | 436 | 0  |  |  |  |  |  |  |  |
| 209.71 | 36 | 0  | 11 | 7  | 85  | 71  | 48  | 52  | 73  | 225 | 15 |  |  |  |  |  |  |  |
| 209.80 | 32 | 8  | 0  | 41 | 73  | 129 | 55  | 115 | 117 | 0   | 20 |  |  |  |  |  |  |  |
| 209.90 | 68 | 17 | 0  | 0  | 57  | 34  | 177 | 109 | 108 | 157 | 24 |  |  |  |  |  |  |  |
| 210.00 | 55 | 36 | 0  | 0  | 52  | 29  | 251 | 334 | 76  | 0   | 5  |  |  |  |  |  |  |  |
| 210.11 | 51 | 0  | 0  | 6  | 38  | 36  | 173 | 143 | 77  | 0   | 10 |  |  |  |  |  |  |  |
| 210.20 | 58 | 13 | 18 | 47 | 84  | 70  | 119 | 202 | 59  | 0   | 21 |  |  |  |  |  |  |  |
| 210.31 | 41 | 0  | 0  | 0  | 65  | 89  | 0   | 106 | 75  | 81  | 0  |  |  |  |  |  |  |  |
| 210.41 | 48 | 0  | 0  | 6  | 82  | 12  | 110 | 29  | 87  | 170 | 39 |  |  |  |  |  |  |  |
| 210.51 | 37 | 0  | 0  | 0  | 40  | 88  | 58  | 116 | 58  | 371 | 26 |  |  |  |  |  |  |  |
| 210.60 | 38 | 0  | 0  | 4  | 110 | 81  | 62  | 176 | 79  | 121 | 4  |  |  |  |  |  |  |  |
| 210.71 | 20 | 0  | 0  | 42 | 62  | 131 | 166 | 176 | 74  | 154 | 5  |  |  |  |  |  |  |  |
| 210.81 | 74 | 7  | 0  | 43 | 84  | 119 | 60  | 0   | 81  | 137 | 5  |  |  |  |  |  |  |  |
| 210.91 | 41 | 0  | 0  | 24 | 100 | 49  | 197 | 87  | 80  | 0   | 9  |  |  |  |  |  |  |  |
| 211.00 | 54 | 15 | 0  | 0  | 109 | 95  | 7   | 101 | 73  | 0   | 13 |  |  |  |  |  |  |  |
| 211.11 | 41 | 27 | 0  | 0  | 22  | 159 | 104 | 149 | 69  | 58  | 9  |  |  |  |  |  |  |  |
| 211.21 | 69 | 14 | 0  | 0  | 33  | 38  | 363 | 250 | 84  | 0   | 0  |  |  |  |  |  |  |  |
| 211.31 | 56 | 11 | 0  | 0  | 139 | 35  | 259 | 196 | 65  | 0   | 6  |  |  |  |  |  |  |  |
| 211.40 | 72 | 0  | 0  | 13 | 33  | 97  | 0   | 154 | 55  | 55  | 39 |  |  |  |  |  |  |  |
| 211.50 | 35 | 0  | 0  | 0  | 126 | 94  | 0   | 145 | 94  | 272 | 13 |  |  |  |  |  |  |  |
| 211.60 | 53 | 0  | 0  | 47 | 94  | 116 | 97  | 110 | 77  | 103 | 15 |  |  |  |  |  |  |  |
| 211.70 | 40 | 0  | 0  | 0  | 85  | 80  | 0   | 63  | 69  | 267 | 25 |  |  |  |  |  |  |  |
| 211.81 | 50 | 6  | 0  | 0  | 46  | 109 | 100 | 102 | 92  | 298 | 17 |  |  |  |  |  |  |  |
| 211.91 | 43 | 0  | 0  | 19 | 33  | 97  | 120 | 84  | 56  | 323 | 10 |  |  |  |  |  |  |  |
| 212.00 | 49 | 0  | 0  | 28 | 98  | 52  | 114 | 110 | 88  | 297 | 12 |  |  |  |  |  |  |  |
| 212.10 | 62 | 0  | 9  | 0  | 57  | 87  | 167 | 197 | 60  | 197 | 31 |  |  |  |  |  |  |  |
| 212.20 | 38 | 17 | 0  | 50 | 14  | 126 | 50  | 109 | 83  | 0   | 7  |  |  |  |  |  |  |  |
| 212.31 | 79 | 28 | 20 | 41 | 86  | 17  | 93  | 219 | 54  | 39  | 0  |  |  |  |  |  |  |  |
| 212.41 | 52 | 9  | 6  | 5  | 63  | 62  | 25  | 248 | 93  | 25  | 53 |  |  |  |  |  |  |  |
| 212.51 | 41 | 22 | 11 | 0  | 59  | 42  | 108 | 247 | 62  | 0   | 30 |  |  |  |  |  |  |  |
| 212.61 | 33 | 0  | 0  | 0  | 66  | 87  | 18  | 92  | 70  | 116 | 22 |  |  |  |  |  |  |  |
| 212.71 | 29 | 0  | 0  | 10 | 58  | 68  | 0   | 59  | 68  | 337 | 8  |  |  |  |  |  |  |  |
| 212.81 | 36 | 0  | 0  | 15 | 19  | 64  | 50  | 16  | 71  | 369 | 15 |  |  |  |  |  |  |  |
| 212.90 | 80 | 13 | 0  | 0  | 91  | 95  | 118 | 71  | 89  | 293 | 24 |  |  |  |  |  |  |  |
| 213.01 | 23 | 0  | 0  | 0  | 96  | 71  | 153 | 21  | 64  | 212 | 46 |  |  |  |  |  |  |  |
| 213.10 | 47 | 4  | 0  | 0  | 60  | 70  | 224 | 59  | 85  | 161 | 22 |  |  |  |  |  |  |  |
| 213.20 | 69 | 21 | 5  | 38 | 124 | 114 | 33  | 121 | 60  | 170 | 40 |  |  |  |  |  |  |  |
| 213.30 | 65 | 8  | 0  | 10 | 63  | 60  | 162 | 219 | 68  | 168 | 29 |  |  |  |  |  |  |  |
| 213.40 | 66 | 9  | 0  | 0  | 62  | 27  | 89  | 290 | 72  | 0   | 10 |  |  |  |  |  |  |  |
| 213.50 | 44 | 0  | 0  | 0  | 89  | 73  | 74  | 202 | 54  | 40  | 0  |  |  |  |  |  |  |  |
| 213.61 | 77 | 18 | 4  | 25 | 74  | 79  | 111 | 54  | 64  | 91  | 0  |  |  |  |  |  |  |  |
| 213.71 | 52 | 0  | 0  | 6  | 106 | 61  | 53  | 35  | 30  | 210 | 5  |  |  |  |  |  |  |  |
| 213.81 | 35 | 0  | 0  | 29 | 45  | 51  | 116 | 101 | 67  | 216 | 0  |  |  |  |  |  |  |  |
| 213.90 | 67 | 0  | 0  | 17 | 95  | 80  | 170 | 118 | 76  | 214 | 24 |  |  |  |  |  |  |  |
| 214.00 | 28 | 18 | 0  | 20 | 70  | 108 | 188 | 179 | 89  | 306 | 12 |  |  |  |  |  |  |  |
| 214.10 | 55 | 0  | 0  | 14 | 111 | 106 | 128 | 71  | 76  | 287 | 11 |  |  |  |  |  |  |  |
| 214.20 | 47 | 0  | 10 | 0  | 52  | 112 | 90  | 65  | 79  | 185 | 16 |  |  |  |  |  |  |  |
| 214.30 | 34 | 0  | 7  | 15 | 60  | 59  | 180 | 247 | 62  | 56  | 28 |  |  |  |  |  |  |  |
| 214.40 | 62 | 20 | 0  | 0  | 69  | 0   | 161 | 249 | 91  | 0   | 0  |  |  |  |  |  |  |  |
| 214.50 | 52 | 7  | 6  | 13 | 44  | 30  | 241 | 237 | 72  | 0   | 37 |  |  |  |  |  |  |  |

|        |    |    |    |    |     |     |     |     |     |     |    |  |  |  |  |  |  |  |
|--------|----|----|----|----|-----|-----|-----|-----|-----|-----|----|--|--|--|--|--|--|--|
| 214.61 | 63 | 22 | 9  | 23 | 64  | 42  | 105 | 171 | 64  | 0   | 14 |  |  |  |  |  |  |  |
| 214.71 | 42 | 0  | 0  | 17 | 27  | 21  | 23  | 128 | 39  | 89  | 0  |  |  |  |  |  |  |  |
| 214.81 | 43 | 16 | 0  | 0  | 119 | 103 | 116 | 69  | 61  | 280 | 14 |  |  |  |  |  |  |  |
| 214.91 | 46 | 0  | 0  | 15 | 51  | 82  | 27  | 102 | 53  | 358 | 0  |  |  |  |  |  |  |  |
| 215.00 | 27 | 0  | 0  | 9  | 68  | 103 | 71  | 32  | 69  | 297 | 14 |  |  |  |  |  |  |  |
| 215.10 | 37 | 0  | 0  | 12 | 96  | 73  | 102 | 7   | 83  | 240 | 27 |  |  |  |  |  |  |  |
| 215.20 | 27 | 0  | 0  | 0  | 90  | 78  | 65  | 30  | 65  | 79  | 26 |  |  |  |  |  |  |  |
| 215.31 | 76 | 0  | 0  | 0  | 31  | 89  | 126 | 237 | 72  | 0   | 10 |  |  |  |  |  |  |  |
| 215.40 | 57 | 6  | 0  | 11 | 118 | 89  | 158 | 175 | 44  | 57  | 0  |  |  |  |  |  |  |  |
| 215.50 | 39 | 0  | 0  | 0  | 68  | 321 | 57  | 76  | 63  | 19  | 8  |  |  |  |  |  |  |  |
| 215.60 | 61 | 0  | 0  | 16 | 59  | 100 | 179 | 0   | 56  | 0   | 26 |  |  |  |  |  |  |  |
| 215.71 | 63 | 8  | 0  | 23 | 70  | 132 | 149 | 123 | 72  | 124 | 13 |  |  |  |  |  |  |  |
| 215.81 | 76 | 0  | 14 | 0  | 86  | 98  | 104 | 227 | 70  | 0   | 45 |  |  |  |  |  |  |  |
| 215.91 | 86 | 17 | 0  | 0  | 23  | 34  | 198 | 137 | 50  | 0   | 17 |  |  |  |  |  |  |  |
| 216.01 | 65 | 4  | 0  | 0  | 83  | 115 | 94  | 112 | 41  | 200 | 0  |  |  |  |  |  |  |  |
| 216.10 | 9  | 0  | 0  | 13 | 62  | 72  | 154 | 41  | 52  | 378 | 37 |  |  |  |  |  |  |  |
| 216.21 | 54 | 0  | 0  | 37 | 96  | 54  | 72  | 96  | 50  | 180 | 26 |  |  |  |  |  |  |  |
| 216.31 | 32 | 0  | 0  | 0  | 14  | 118 | 60  | 51  | 84  | 286 | 32 |  |  |  |  |  |  |  |
| 216.41 | 51 | 0  | 0  | 0  | 76  | 119 | 169 | 37  | 94  | 286 | 27 |  |  |  |  |  |  |  |
| 216.51 | 0  | 0  | 0  | 27 | 71  | 58  | 236 | 135 | 82  | 166 | 20 |  |  |  |  |  |  |  |
| 216.61 | 63 | 10 | 0  | 46 | 74  | 97  | 77  | 148 | 80  | 276 | 21 |  |  |  |  |  |  |  |
| 216.71 | 48 | 22 | 19 | 20 | 42  | 92  | 248 | 193 | 90  | 41  | 21 |  |  |  |  |  |  |  |
| 216.81 | 32 | 18 | 0  | 21 | 26  | 105 | 136 | 281 | 86  | 0   | 14 |  |  |  |  |  |  |  |
| 216.90 | 55 | 5  | 0  | 61 | 55  | 94  | 84  | 154 | 78  | 0   | 33 |  |  |  |  |  |  |  |
| 217.00 | 73 | 0  | 0  | 40 | 80  | 82  | 96  | 97  | 88  | 239 | 25 |  |  |  |  |  |  |  |
| 217.10 | 58 | 7  | 0  | 20 | 31  | 85  | 99  | 12  | 56  | 285 | 42 |  |  |  |  |  |  |  |
| 217.20 | 55 | 0  | 0  | 4  | 111 | 76  | 37  | 0   | 59  | 166 | 42 |  |  |  |  |  |  |  |
| 217.30 | 46 | 0  | 0  | 19 | 143 | 124 | 238 | 136 | 106 | 93  | 34 |  |  |  |  |  |  |  |
| 217.40 | 51 | 23 | 0  | 0  | 66  | 108 | 55  | 177 | 119 | 0   | 22 |  |  |  |  |  |  |  |
| 217.51 | 45 | 0  | 0  | 0  | 47  | 60  | 98  | 163 | 94  | 0   | 39 |  |  |  |  |  |  |  |
| 217.61 | 42 | 0  | 0  | 7  | 55  | 77  | 89  | 236 | 74  | 0   | 0  |  |  |  |  |  |  |  |
| 217.70 | 34 | 0  | 0  | 35 | 102 | 150 | 137 | 58  | 105 | 240 | 24 |  |  |  |  |  |  |  |
| 217.80 | 51 | 6  | 0  | 0  | 87  | 135 | 86  | 9   | 104 | 281 | 22 |  |  |  |  |  |  |  |
| 217.91 | 59 | 0  | 0  | 24 | 80  | 116 | 72  | 95  | 109 | 246 | 35 |  |  |  |  |  |  |  |
| 218.01 | 23 | 9  | 0  | 5  | 80  | 150 | 140 | 0   | 141 | 172 | 26 |  |  |  |  |  |  |  |
| 218.11 | 49 | 33 | 19 | 19 | 113 | 132 | 129 | 62  | 164 | 118 | 9  |  |  |  |  |  |  |  |
| 218.21 | 78 | 15 | 8  | 19 | 39  | 148 | 64  | 178 | 167 | 0   | 14 |  |  |  |  |  |  |  |
| 218.30 | 52 | 0  | 0  | 5  | 50  | 87  | 231 | 305 | 170 | 0   | 37 |  |  |  |  |  |  |  |
| 218.41 | 50 | 4  | 0  | 60 | 80  | 183 | 92  | 173 | 125 | 0   | 7  |  |  |  |  |  |  |  |
| 218.51 | 46 | 0  | 0  | 6  | 46  | 101 | 74  | 0   | 81  | 161 | 0  |  |  |  |  |  |  |  |
| 218.60 | 33 | 0  | 0  | 17 | 58  | 95  | 0   | 0   | 28  | 476 | 21 |  |  |  |  |  |  |  |
| 218.71 | 23 | 0  | 0  | 32 | 82  | 66  | 42  | 0   | 41  | 646 | 14 |  |  |  |  |  |  |  |
| 218.81 | 0  | 0  | 0  | 0  | 46  | 91  | 0   | 0   | 23  | 628 | 16 |  |  |  |  |  |  |  |
| 218.90 | 26 | 0  | 0  | 6  | 34  | 63  | 0   | 0   | 34  | 595 | 11 |  |  |  |  |  |  |  |
| 219.00 | 10 | 0  | 0  | 0  | 64  | 52  | 0   | 0   | 15  | 424 | 0  |  |  |  |  |  |  |  |
| 219.11 | 0  | 0  | 0  | 8  | 51  | 89  | 0   | 0   | 37  | 528 | 6  |  |  |  |  |  |  |  |
| 219.21 | 0  | 0  | 0  | 34 | 34  | 80  | 31  | 0   | 38  | 686 | 0  |  |  |  |  |  |  |  |
| 219.31 | 9  | 0  | 0  | 0  | 71  | 78  | 0   | 0   | 33  | 690 | 0  |  |  |  |  |  |  |  |
| 219.41 | 28 | 0  | 0  | 19 | 65  | 81  | 10  | 0   | 33  | 721 | 13 |  |  |  |  |  |  |  |
| 219.50 | 13 | 0  | 0  | 0  | 67  | 63  | 24  | 0   | 24  | 694 | 0  |  |  |  |  |  |  |  |
| 219.60 | 0  | 0  | 0  | 14 | 74  | 93  | 0   | 0   | 27  | 519 | 0  |  |  |  |  |  |  |  |
| 219.71 | 0  | 0  | 0  | 12 | 87  | 49  | 0   | 20  | 38  | 579 | 0  |  |  |  |  |  |  |  |
| 219.81 | 0  | 0  | 0  | 20 | 46  | 90  | 0   | 0   | 32  | 643 | 0  |  |  |  |  |  |  |  |
| 219.90 | 0  | 0  | 0  | 15 | 79  | 78  | 0   | 0   | 28  | 580 | 0  |  |  |  |  |  |  |  |
| 220.01 | 15 | 0  | 0  | 15 | 53  | 101 | 5   | 0   | 38  | 714 | 0  |  |  |  |  |  |  |  |
| 220.10 | 22 | 0  | 0  | 0  | 41  | 102 | 6   | 0   | 30  | 727 | 0  |  |  |  |  |  |  |  |
| 220.20 | 37 | 0  | 0  | 13 | 62  | 75  | 0   | 0   | 43  | 766 | 0  |  |  |  |  |  |  |  |
| 220.30 | 15 | 0  | 0  | 16 | 59  | 49  | 11  | 0   | 32  | 647 | 6  |  |  |  |  |  |  |  |

|        |    |   |   |    |    |    |   |    |    |     |    |  |  |  |  |  |  |  |
|--------|----|---|---|----|----|----|---|----|----|-----|----|--|--|--|--|--|--|--|
| 220.41 | 8  | 0 | 0 | 49 | 68 | 76 | 0 | 0  | 14 | 628 | 0  |  |  |  |  |  |  |  |
| 220.51 | 6  | 0 | 0 | 0  | 95 | 62 | 0 | 0  | 17 | 698 | 11 |  |  |  |  |  |  |  |
| 220.61 | 7  | 0 | 0 | 54 | 67 | 75 | 0 | 15 | 22 | 634 | 0  |  |  |  |  |  |  |  |
| 220.71 | 0  | 0 | 0 | 21 | 49 | 83 | 0 | 0  | 26 | 604 | 0  |  |  |  |  |  |  |  |
| 220.81 | 18 | 0 | 0 | 37 | 62 | 47 | 0 | 0  | 22 | 696 | 0  |  |  |  |  |  |  |  |
| 220.90 | 15 | 0 | 0 | 34 | 87 | 60 | 6 | 0  | 26 | 811 | 0  |  |  |  |  |  |  |  |
| 221.01 | 29 | 0 | 0 | 14 | 70 | 52 | 0 | 0  | 38 | 533 | 0  |  |  |  |  |  |  |  |
| 221.11 | 29 | 0 | 0 | 30 | 53 | 81 | 0 | 0  | 47 | 772 | 5  |  |  |  |  |  |  |  |
| 221.21 | 26 | 0 | 0 | 9  | 75 | 64 | 0 | 0  | 20 | 700 | 0  |  |  |  |  |  |  |  |
| 221.31 | 0  | 0 | 0 | 15 | 63 | 71 | 0 | 0  | 43 | 453 | 0  |  |  |  |  |  |  |  |
| 221.40 | 59 | 0 | 0 | 14 | 73 | 95 | 0 | 0  | 32 | 670 | 12 |  |  |  |  |  |  |  |
| 221.51 | 9  | 0 | 0 | 25 | 77 | 30 | 8 | 0  | 25 | 628 | 0  |  |  |  |  |  |  |  |
| 221.61 | 0  | 0 | 0 | 27 | 76 | 74 | 0 | 0  | 10 | 496 | 0  |  |  |  |  |  |  |  |
| 221.70 | 0  | 0 | 0 | 22 | 61 | 77 | 0 | 0  | 10 | 539 | 12 |  |  |  |  |  |  |  |
| 221.81 | 27 | 0 | 0 | 48 | 84 | 39 | 0 | 0  | 50 | 567 | 18 |  |  |  |  |  |  |  |
| 221.91 | 17 | 0 | 0 | 24 | 77 | 77 | 0 | 0  | 47 | 625 | 17 |  |  |  |  |  |  |  |
| 222.01 | 0  | 0 | 0 | 11 | 71 | 70 | 0 | 0  | 32 | 492 | 8  |  |  |  |  |  |  |  |
