# Supplementary material for: Dendrochemical Challenge in Climate Science: Whether Chemical Elements in Wood Reflect the Fluctuations in Weather Parameters
Source: MDPI journal article supplement (doi:10.3390/plants11233240), 2022-11-25
Supplement: s1 [file s1]

[illegible]

|        |    |    |    |    |     |     |     |     |      |     |     |  |  |  |  |  |  |  |
|--------|----|----|----|----|-----|-----|-----|-----|------|-----|-----|--|--|--|--|--|--|--|
| 155.21 | 0  | 10 | 27 | 0  | 165 | 65  | 148 | 148 | 1852 | 440 | 870 |  |  |  |  |  |  |  |
| 155.31 | 11 | 18 | 34 | 10 | 162 | 92  | 320 | 151 | 1685 | 211 | 864 |  |  |  |  |  |  |  |
| 155.41 | 6  | 15 | 45 | 0  | 173 | 81  | 227 | 140 | 1662 | 0   | 855 |  |  |  |  |  |  |  |
| 155.5  | 14 | 24 | 52 | 16 | 183 | 89  | 264 | 153 | 1549 | 96  | 859 |  |  |  |  |  |  |  |
| 155.61 | 0  | 20 | 36 | 0  | 126 | 153 | 317 | 188 | 1647 | 388 | 863 |  |  |  |  |  |  |  |
| 155.71 | 12 | 25 | 31 | 0  | 164 | 162 | 274 | 232 | 1555 | 375 | 856 |  |  |  |  |  |  |  |
| 155.81 | 15 | 22 | 35 | 0  | 146 | 26  | 207 | 157 | 1680 | 245 | 781 |  |  |  |  |  |  |  |
| 155.91 | 14 | 14 | 44 | 0  | 177 | 124 | 219 | 21  | 1660 | 351 | 784 |  |  |  |  |  |  |  |
| 156    | 0  | 19 | 40 | 0  | 123 | 158 | 276 | 255 | 1749 | 303 | 785 |  |  |  |  |  |  |  |
| 156.11 | 12 | 4  | 26 | 0  | 209 | 158 | 214 | 115 | 1601 | 370 | 740 |  |  |  |  |  |  |  |
| 156.21 | 25 | 18 | 51 | 47 | 207 | 79  | 269 | 168 | 1717 | 466 | 817 |  |  |  |  |  |  |  |
| 156.3  | 0  | 0  | 41 | 0  | 208 | 144 | 223 | 148 | 1934 | 321 | 916 |  |  |  |  |  |  |  |
| 156.41 | 23 | 37 | 37 | 0  | 238 | 103 | 274 | 266 | 1769 | 59  | 950 |  |  |  |  |  |  |  |
| 156.5  | 0  | 7  | 11 | 0  | 172 | 42  | 331 | 292 | 1612 | 17  | 801 |  |  |  |  |  |  |  |
| 156.61 | 6  | 12 | 37 | 0  | 141 | 57  | 333 | 299 | 1412 | 0   | 739 |  |  |  |  |  |  |  |
| 156.71 | 9  | 16 | 30 | 0  | 141 | 116 | 304 | 138 | 1473 | 56  | 760 |  |  |  |  |  |  |  |
| 156.81 | 8  | 17 | 42 | 0  | 187 | 105 | 194 | 221 | 1556 | 140 | 785 |  |  |  |  |  |  |  |
| 156.9  | 13 | 16 | 39 | 13 | 215 | 115 | 177 | 44  | 1630 | 288 | 736 |  |  |  |  |  |  |  |
| 157.01 | 12 | 26 | 21 | 24 | 193 | 153 | 189 | 88  | 1736 | 395 | 721 |  |  |  |  |  |  |  |
| 157.1  | 7  | 19 | 32 | 0  | 231 | 128 | 125 | 196 | 1818 | 499 | 781 |  |  |  |  |  |  |  |
| 157.21 | 4  | 17 | 60 | 0  | 168 | 113 | 220 | 98  | 1999 | 339 | 787 |  |  |  |  |  |  |  |
| 157.3  | 9  | 19 | 26 | 0  | 210 | 193 | 198 | 114 | 2028 | 351 | 809 |  |  |  |  |  |  |  |
| 157.41 | 6  | 5  | 23 | 0  | 230 | 156 | 319 | 139 | 2059 | 313 | 848 |  |  |  |  |  |  |  |
| 157.51 | 0  | 0  | 67 | 0  | 205 | 125 | 248 | 192 | 2210 | 363 | 930 |  |  |  |  |  |  |  |
| 157.6  | 26 | 0  | 31 | 0  | 201 | 67  | 253 | 173 | 2176 | 0   | 965 |  |  |  |  |  |  |  |
| 157.71 | 12 | 15 | 28 | 0  | 185 | 62  | 351 | 317 | 1668 | 0   | 873 |  |  |  |  |  |  |  |
| 157.81 | 26 | 0  | 38 | 0  | 114 | 84  | 253 | 316 | 1391 | 0   | 803 |  |  |  |  |  |  |  |
| 157.91 | 0  | 19 | 46 | 0  | 176 | 0   | 339 | 177 | 1369 | 21  | 675 |  |  |  |  |  |  |  |
| 158    | 14 | 17 | 24 | 0  | 199 | 67  | 166 | 191 | 1437 | 132 | 551 |  |  |  |  |  |  |  |
| 158.11 | 6  | 5  | 19 | 0  | 190 | 86  | 166 | 67  | 1578 | 253 | 628 |  |  |  |  |  |  |  |
| 158.21 | 32 | 0  | 38 | 11 | 187 | 115 | 159 | 0   | 1602 | 196 | 682 |  |  |  |  |  |  |  |
| 158.3  | 10 | 18 | 43 | 0  | 149 | 117 | 120 | 94  | 1730 | 161 | 666 |  |  |  |  |  |  |  |
| 158.41 | 5  | 5  | 36 | 0  | 220 | 136 | 159 | 123 | 1951 | 365 | 779 |  |  |  |  |  |  |  |
| 158.51 | 0  | 5  | 46 | 0  | 200 | 135 | 138 | 0   | 1916 | 320 | 829 |  |  |  |  |  |  |  |
| 158.61 | 12 | 9  | 35 | 0  | 201 | 151 | 167 | 124 | 2214 | 178 | 871 |  |  |  |  |  |  |  |
| 158.71 | 26 | 19 | 43 | 0  | 197 | 106 | 235 | 84  | 2239 | 0   | 981 |  |  |  |  |  |  |  |
| 158.81 | 17 | 13 | 14 | 0  | 167 | 18  | 229 | 307 | 1765 | 107 | 837 |  |  |  |  |  |  |  |
| 158.91 | 33 | 17 | 42 | 0  | 174 | 86  | 264 | 147 | 1703 | 8   | 754 |  |  |  |  |  |  |  |
| 159    | 16 | 14 | 44 | 0  | 157 | 267 | 322 | 186 | 1713 | 0   | 758 |  |  |  |  |  |  |  |
| 159.11 | 23 | 32 | 39 | 0  | 216 | 223 | 59  | 63  | 1870 | 74  | 787 |  |  |  |  |  |  |  |
| 159.2  | 0  | 25 | 40 | 0  | 260 | 107 | 130 | 115 | 1916 | 109 | 789 |  |  |  |  |  |  |  |
| 159.31 | 13 | 24 | 58 | 0  | 236 | 97  | 174 | 56  | 2041 | 388 | 750 |  |  |  |  |  |  |  |
| 159.4  | 10 | 33 | 37 | 0  | 235 | 62  | 151 | 88  | 2132 | 49  | 840 |  |  |  |  |  |  |  |
| 159.51 | 0  | 0  | 23 | 0  | 110 | 60  | 222 | 322 | 1849 | 36  | 839 |  |  |  |  |  |  |  |
| 159.61 | 0  | 11 | 12 | 0  | 90  | 23  | 242 | 215 | 1442 | 90  | 674 |  |  |  |  |  |  |  |
| 159.71 | 0  | 31 | 34 | 0  | 189 | 21  | 217 | 225 | 1295 | 0   | 604 |  |  |  |  |  |  |  |
| 159.81 | 25 | 4  | 7  | 0  | 148 | 95  | 299 | 256 | 1345 | 0   | 601 |  |  |  |  |  |  |  |
| 159.91 | 5  | 17 | 23 | 0  | 158 | 62  | 240 | 284 | 1685 | 10  | 719 |  |  |  |  |  |  |  |
| 160.01 | 11 | 5  | 39 | 0  | 166 | 31  | 118 | 82  | 1958 | 218 | 816 |  |  |  |  |  |  |  |
| 160.11 | 14 | 33 | 53 | 0  | 216 | 55  | 95  | 61  | 1990 | 261 | 733 |  |  |  |  |  |  |  |
| 160.21 | 10 | 15 | 25 | 0  | 234 | 79  | 102 | 138 | 2042 | 336 | 686 |  |  |  |  |  |  |  |
| 160.31 | 0  | 7  | 34 | 0  | 182 | 128 | 153 | 125 | 2029 | 303 | 721 |  |  |  |  |  |  |  |
| 160.41 | 0  | 12 | 62 | 0  | 276 | 102 | 106 | 122 | 2134 | 172 | 775 |  |  |  |  |  |  |  |
| 160.51 | 4  | 12 | 31 | 0  | 245 | 113 | 122 | 71  | 2210 | 265 | 839 |  |  |  |  |  |  |  |
| 160.61 | 20 | 17 | 44 | 0  | 212 | 76  | 276 | 154 | 2304 | 0   | 860 |  |  |  |  |  |  |  |
| 160.7  | 19 | 0  | 31 | 51 | 209 | 37  | 279 | 399 | 1928 | 0   | 780 |  |  |  |  |  |  |  |
| 160.81 | 27 | 6  | 51 | 0  | 167 | 48  | 205 | 236 | 1513 | 0   | 728 |  |  |  |  |  |  |  |
| 160.91 | 19 | 32 | 51 | 0  | 216 | 24  | 222 | 247 | 1578 | 0   | 753 |  |  |  |  |  |  |  |

|        |    |    |    |    |     |     |     |     |      |     |     |  |  |  |  |  |  |  |
|--------|----|----|----|----|-----|-----|-----|-----|------|-----|-----|--|--|--|--|--|--|--|
| 161.01 | 16 | 12 | 27 | 30 | 226 | 115 | 146 | 118 | 1780 | 116 | 660 |  |  |  |  |  |  |  |
| 161.11 | 13 | 31 | 32 | 0  | 262 | 77  | 166 | 197 | 2036 | 129 | 688 |  |  |  |  |  |  |  |
| 161.21 | 29 | 9  | 30 | 0  | 206 | 98  | 121 | 121 | 2117 | 303 | 706 |  |  |  |  |  |  |  |
| 161.31 | 0  | 5  | 31 | 0  | 222 | 83  | 122 | 152 | 2118 | 442 | 746 |  |  |  |  |  |  |  |
| 161.41 | 17 | 0  | 48 | 0  | 286 | 60  | 98  | 183 | 2123 | 185 | 829 |  |  |  |  |  |  |  |
| 161.51 | 6  | 14 | 34 | 0  | 215 | 31  | 276 | 170 | 1876 | 125 | 804 |  |  |  |  |  |  |  |
| 161.61 | 12 | 29 | 36 | 0  | 156 | 105 | 192 | 271 | 1822 | 0   | 784 |  |  |  |  |  |  |  |
| 161.71 | 12 | 6  | 32 | 0  | 185 | 64  | 140 | 120 | 1806 | 221 | 754 |  |  |  |  |  |  |  |
| 161.81 | 0  | 11 | 31 | 0  | 214 | 169 | 145 | 112 | 1836 | 237 | 762 |  |  |  |  |  |  |  |
| 161.91 | 0  | 0  | 21 | 0  | 191 | 118 | 218 | 98  | 1843 | 414 | 634 |  |  |  |  |  |  |  |
| 162.01 | 15 | 20 | 42 | 0  | 261 | 66  | 45  | 109 | 1746 | 376 | 588 |  |  |  |  |  |  |  |
| 162.11 | 0  | 20 | 36 | 0  | 204 | 95  | 35  | 110 | 1866 | 368 | 652 |  |  |  |  |  |  |  |
| 162.21 | 18 | 0  | 17 | 0  | 215 | 85  | 159 | 265 | 2027 | 383 | 753 |  |  |  |  |  |  |  |
| 162.3  | 44 | 29 | 44 | 0  | 156 | 138 | 166 | 118 | 2357 | 294 | 864 |  |  |  |  |  |  |  |
| 162.41 | 0  | 0  | 17 | 0  | 267 | 110 | 221 | 281 | 2402 | 109 | 931 |  |  |  |  |  |  |  |
| 162.5  | 28 | 16 | 44 | 0  | 178 | 90  | 219 | 357 | 2204 | 0   | 798 |  |  |  |  |  |  |  |
| 162.61 | 0  | 16 | 40 | 0  | 180 | 27  | 298 | 283 | 1705 | 0   | 699 |  |  |  |  |  |  |  |
| 162.71 | 0  | 25 | 37 | 0  | 116 | 0   | 278 | 331 | 1703 | 0   | 725 |  |  |  |  |  |  |  |
| 162.81 | 23 | 15 | 35 | 0  | 217 | 109 | 167 | 181 | 1653 | 0   | 740 |  |  |  |  |  |  |  |
| 162.91 | 21 | 9  | 21 | 0  | 172 | 70  | 192 | 177 | 1780 | 221 | 697 |  |  |  |  |  |  |  |
| 163    | 0  | 5  | 20 | 0  | 196 | 78  | 157 | 191 | 1837 | 311 | 732 |  |  |  |  |  |  |  |
| 163.11 | 0  | 12 | 39 | 0  | 243 | 112 | 71  | 172 | 1978 | 343 | 719 |  |  |  |  |  |  |  |
| 163.21 | 0  | 28 | 33 | 0  | 156 | 91  | 173 | 218 | 2065 | 98  | 667 |  |  |  |  |  |  |  |
| 163.31 | 0  | 0  | 13 | 8  | 160 | 98  | 222 | 319 | 2124 | 443 | 646 |  |  |  |  |  |  |  |
| 163.4  | 0  | 0  | 37 | 0  | 205 | 83  | 91  | 94  | 2050 | 155 | 657 |  |  |  |  |  |  |  |
| 163.51 | 12 | 14 | 36 | 20 | 214 | 50  | 151 | 36  | 2121 | 270 | 732 |  |  |  |  |  |  |  |
| 163.61 | 0  | 8  | 20 | 0  | 235 | 93  | 60  | 172 | 2179 | 504 | 709 |  |  |  |  |  |  |  |
| 163.7  | 14 | 31 | 23 | 0  | 237 | 86  | 173 | 113 | 2245 | 402 | 750 |  |  |  |  |  |  |  |
| 163.81 | 0  | 0  | 28 | 0  | 240 | 55  | 170 | 294 | 2447 | 211 | 810 |  |  |  |  |  |  |  |
| 163.91 | 17 | 28 | 42 | 0  | 183 | 74  | 321 | 281 | 2248 | 0   | 801 |  |  |  |  |  |  |  |
| 164.01 | 15 | 10 | 38 | 0  | 205 | 55  | 255 | 339 | 1969 | 0   | 821 |  |  |  |  |  |  |  |
| 164.11 | 0  | 7  | 0  | 0  | 153 | 14  | 156 | 282 | 1679 | 0   | 648 |  |  |  |  |  |  |  |
| 164.21 | 0  | 16 | 21 | 0  | 236 | 78  | 261 | 232 | 1841 | 138 | 604 |  |  |  |  |  |  |  |
| 164.3  | 27 | 13 | 33 | 0  | 236 | 93  | 81  | 224 | 2047 | 115 | 639 |  |  |  |  |  |  |  |
| 164.41 | 0  | 18 | 44 | 0  | 220 | 105 | 55  | 173 | 2024 | 323 | 636 |  |  |  |  |  |  |  |
| 164.5  | 11 | 45 | 43 | 0  | 161 | 99  | 98  | 120 | 2247 | 209 | 625 |  |  |  |  |  |  |  |
| 164.61 | 19 | 16 | 40 | 0  | 200 | 109 | 112 | 172 | 2309 | 303 | 633 |  |  |  |  |  |  |  |
| 164.71 | 7  | 11 | 34 | 7  | 186 | 101 | 112 | 55  | 2170 | 310 | 680 |  |  |  |  |  |  |  |
| 164.8  | 7  | 5  | 38 | 0  | 230 | 109 | 141 | 134 | 2334 | 204 | 710 |  |  |  |  |  |  |  |
| 164.91 | 0  | 16 | 20 | 0  | 226 | 101 | 246 | 168 | 2331 | 259 | 754 |  |  |  |  |  |  |  |
| 165.01 | 10 | 7  | 0  | 0  | 139 | 47  | 234 | 228 | 1946 | 0   | 709 |  |  |  |  |  |  |  |
| 165.11 | 13 | 19 | 26 | 0  | 204 | 80  | 196 | 257 | 1632 | 0   | 673 |  |  |  |  |  |  |  |
| 165.21 | 21 | 0  | 44 | 0  | 141 | 23  | 193 | 169 | 1622 | 0   | 672 |  |  |  |  |  |  |  |
| 165.31 | 5  | 15 | 26 | 0  | 159 | 74  | 254 | 212 | 1642 | 251 | 596 |  |  |  |  |  |  |  |
| 165.41 | 6  | 0  | 13 | 0  | 201 | 63  | 126 | 109 | 1966 | 316 | 615 |  |  |  |  |  |  |  |
| 165.51 | 12 | 4  | 17 | 6  | 216 | 87  | 138 | 12  | 2083 | 418 | 581 |  |  |  |  |  |  |  |
| 165.61 | 0  | 8  | 48 | 0  | 208 | 95  | 86  | 127 | 2114 | 195 | 585 |  |  |  |  |  |  |  |
| 165.71 | 12 | 5  | 32 | 0  | 226 | 74  | 85  | 168 | 2332 | 259 | 704 |  |  |  |  |  |  |  |
| 165.8  | 11 | 45 | 30 | 0  | 235 | 47  | 289 | 340 | 2296 | 0   | 882 |  |  |  |  |  |  |  |
| 165.91 | 0  | 13 | 24 | 0  | 135 | 80  | 230 | 271 | 1908 | 0   | 804 |  |  |  |  |  |  |  |
| 166.01 | 0  | 6  | 29 | 0  | 145 | 60  | 205 | 278 | 1628 | 88  | 614 |  |  |  |  |  |  |  |
| 166.11 | 0  | 19 | 27 | 0  | 201 | 60  | 221 | 165 | 1564 | 137 | 573 |  |  |  |  |  |  |  |
| 166.21 | 10 | 10 | 49 | 0  | 204 | 88  | 180 | 220 | 1716 | 197 | 596 |  |  |  |  |  |  |  |
| 166.31 | 9  | 18 | 15 | 0  | 182 | 101 | 93  | 88  | 1778 | 386 | 567 |  |  |  |  |  |  |  |
| 166.41 | 24 | 9  | 40 | 0  | 179 | 139 | 151 | 35  | 1870 | 318 | 589 |  |  |  |  |  |  |  |
| 166.51 | 0  | 13 | 54 | 0  | 118 | 96  | 100 | 127 | 1967 | 327 | 584 |  |  |  |  |  |  |  |
| 166.61 | 8  | 0  | 44 | 9  | 204 | 107 | 24  | 88  | 2069 | 475 | 605 |  |  |  |  |  |  |  |
| 166.71 | 0  | 0  | 33 | 10 | 234 | 140 | 51  | 96  | 2094 | 428 | 635 |  |  |  |  |  |  |  |

|        |    |    |    |    |     |     |     |     |      |     |     |  |  |  |  |  |  |  |
|--------|----|----|----|----|-----|-----|-----|-----|------|-----|-----|--|--|--|--|--|--|--|
| 166.81 | 14 | 9  | 19 | 0  | 218 | 145 | 71  | 237 | 2227 | 552 | 610 |  |  |  |  |  |  |  |
| 166.91 | 20 | 17 | 35 | 0  | 192 | 182 | 113 | 256 | 2312 | 473 | 728 |  |  |  |  |  |  |  |
| 167.01 | 0  | 0  | 23 | 0  | 260 | 85  | 118 | 126 | 2484 | 290 | 748 |  |  |  |  |  |  |  |
| 167.11 | 0  | 35 | 33 | 18 | 241 | 98  | 173 | 320 | 2574 | 115 | 889 |  |  |  |  |  |  |  |
| 167.2  | 0  | 10 | 19 | 0  | 195 | 68  | 218 | 364 | 2310 | 0   | 900 |  |  |  |  |  |  |  |
| 167.31 | 0  | 12 | 36 | 0  | 175 | 82  | 281 | 177 | 1980 | 0   | 723 |  |  |  |  |  |  |  |
| 167.4  | 27 | 25 | 39 | 0  | 219 | 48  | 160 | 234 | 1791 | 158 | 574 |  |  |  |  |  |  |  |
| 167.51 | 11 | 17 | 46 | 0  | 160 | 126 | 134 | 131 | 2001 | 274 | 578 |  |  |  |  |  |  |  |
| 167.61 | 0  | 10 | 16 | 0  | 194 | 110 | 168 | 93  | 2105 | 459 | 613 |  |  |  |  |  |  |  |
| 167.7  | 0  | 6  | 33 | 0  | 168 | 138 | 120 | 130 | 2283 | 472 | 620 |  |  |  |  |  |  |  |
| 167.81 | 0  | 0  | 16 | 0  | 255 | 45  | 109 | 133 | 2582 | 398 | 675 |  |  |  |  |  |  |  |
| 167.9  | 5  | 15 | 28 | 0  | 210 | 89  | 238 | 213 | 2503 | 136 | 837 |  |  |  |  |  |  |  |
| 168.01 | 0  | 0  | 33 | 0  | 211 | 85  | 191 | 242 | 2311 | 0   | 836 |  |  |  |  |  |  |  |
| 168.1  | 0  | 0  | 29 | 0  | 174 | 99  | 209 | 191 | 2164 | 297 | 769 |  |  |  |  |  |  |  |
| 168.21 | 0  | 0  | 26 | 0  | 198 | 74  | 200 | 200 | 2288 | 125 | 780 |  |  |  |  |  |  |  |
| 168.31 | 24 | 11 | 20 | 0  | 296 | 75  | 162 | 62  | 2119 | 119 | 719 |  |  |  |  |  |  |  |
| 168.41 | 25 | 5  | 25 | 34 | 205 | 128 | 144 | 243 | 2173 | 348 | 672 |  |  |  |  |  |  |  |
| 168.5  | 16 | 13 | 49 | 0  | 260 | 84  | 95  | 154 | 2335 | 350 | 686 |  |  |  |  |  |  |  |
| 168.61 | 26 | 17 | 39 | 29 | 241 | 70  | 171 | 186 | 2330 | 438 | 694 |  |  |  |  |  |  |  |
| 168.71 | 14 | 9  | 17 | 0  | 235 | 43  | 177 | 147 | 2610 | 153 | 763 |  |  |  |  |  |  |  |
| 168.8  | 21 | 17 | 50 | 0  | 208 | 82  | 167 | 314 | 2127 | 145 | 783 |  |  |  |  |  |  |  |
| 168.91 | 19 | 6  | 39 | 0  | 228 | 70  | 227 | 289 | 1688 | 0   | 684 |  |  |  |  |  |  |  |
| 169.01 | 14 | 23 | 22 | 0  | 136 | 21  | 214 | 301 | 1643 | 0   | 672 |  |  |  |  |  |  |  |
| 169.1  | 0  | 27 | 17 | 0  | 186 | 53  | 140 | 199 | 1708 | 54  | 618 |  |  |  |  |  |  |  |
| 169.21 | 0  | 8  | 37 | 0  | 213 | 92  | 82  | 156 | 1807 | 160 | 602 |  |  |  |  |  |  |  |
| 169.3  | 0  | 17 | 16 | 0  | 248 | 96  | 102 | 99  | 1943 | 307 | 547 |  |  |  |  |  |  |  |
| 169.41 | 0  | 17 | 33 | 0  | 237 | 74  | 0   | 174 | 2338 | 251 | 570 |  |  |  |  |  |  |  |
| 169.51 | 0  | 0  | 44 | 0  | 240 | 76  | 43  | 173 | 2269 | 460 | 576 |  |  |  |  |  |  |  |
| 169.61 | 17 | 15 | 43 | 30 | 199 | 121 | 102 | 88  | 2360 | 406 | 554 |  |  |  |  |  |  |  |
| 169.7  | 0  | 0  | 27 | 0  | 269 | 65  | 14  | 13  | 2524 | 422 | 679 |  |  |  |  |  |  |  |
| 169.81 | 0  | 24 | 28 | 0  | 202 | 99  | 168 | 171 | 2535 | 113 | 797 |  |  |  |  |  |  |  |
| 169.91 | 0  | 6  | 22 | 0  | 175 | 13  | 170 | 234 | 2217 | 35  | 728 |  |  |  |  |  |  |  |
| 170.01 | 0  | 20 | 28 | 0  | 230 | 146 | 125 | 178 | 2097 | 0   | 633 |  |  |  |  |  |  |  |
| 170.11 | 0  | 0  | 36 | 0  | 208 | 107 | 104 | 156 | 2267 | 504 | 628 |  |  |  |  |  |  |  |
| 170.21 | 0  | 14 | 10 | 0  | 249 | 144 | 210 | 102 | 2404 | 254 | 632 |  |  |  |  |  |  |  |
| 170.31 | 10 | 5  | 25 | 0  | 182 | 110 | 287 | 178 | 2542 | 132 | 803 |  |  |  |  |  |  |  |
| 170.41 | 24 | 7  | 51 | 0  | 236 | 73  | 269 | 202 | 2560 | 0   | 913 |  |  |  |  |  |  |  |
| 170.5  | 4  | 15 | 20 | 0  | 259 | 58  | 180 | 234 | 2288 | 0   | 733 |  |  |  |  |  |  |  |
| 170.61 | 13 | 7  | 26 | 0  | 276 | 72  | 177 | 307 | 2281 | 317 | 660 |  |  |  |  |  |  |  |
| 170.7  | 22 | 0  | 19 | 0  | 259 | 124 | 69  | 5   | 2266 | 420 | 616 |  |  |  |  |  |  |  |
| 170.81 | 13 | 11 | 21 | 0  | 247 | 74  | 102 | 27  | 2286 | 432 | 532 |  |  |  |  |  |  |  |
| 170.9  | 14 | 16 | 16 | 0  | 247 | 137 | 120 | 54  | 2203 | 579 | 569 |  |  |  |  |  |  |  |
| 171.01 | 0  | 24 | 29 | 0  | 209 | 374 | 101 | 46  | 2414 | 471 | 652 |  |  |  |  |  |  |  |
| 171.11 | 0  | 0  | 40 | 0  | 228 | 267 | 177 | 154 | 2910 | 396 | 779 |  |  |  |  |  |  |  |
| 171.2  | 20 | 0  | 27 | 0  | 248 | 104 | 202 | 245 | 3130 | 190 | 894 |  |  |  |  |  |  |  |
| 171.31 | 22 | 7  | 21 | 0  | 273 | 99  | 115 | 289 | 3013 | 133 | 790 |  |  |  |  |  |  |  |
| 171.4  | 0  | 6  | 47 | 0  | 295 | 87  | 176 | 147 | 2828 | 272 | 673 |  |  |  |  |  |  |  |
| 171.51 | 0  | 0  | 40 | 0  | 302 | 167 | 200 | 121 | 2731 | 56  | 692 |  |  |  |  |  |  |  |
| 171.6  | 7  | 25 | 52 | 0  | 269 | 86  | 278 | 215 | 2738 | 75  | 799 |  |  |  |  |  |  |  |
| 171.71 | 0  | 17 | 32 | 0  | 246 | 59  | 215 | 204 | 2592 | 107 | 806 |  |  |  |  |  |  |  |
| 171.81 | 26 | 24 | 26 | 0  | 242 | 83  | 152 | 151 | 2502 | 40  | 688 |  |  |  |  |  |  |  |
| 171.91 | 14 | 0  | 40 | 0  | 267 | 121 | 156 | 167 | 2327 | 210 | 604 |  |  |  |  |  |  |  |
| 172.01 | 21 | 24 | 34 | 0  | 296 | 123 | 76  | 130 | 2075 | 335 | 477 |  |  |  |  |  |  |  |
| 172.11 | 12 | 0  | 37 | 0  | 178 | 114 | 193 | 117 | 1684 | 539 | 404 |  |  |  |  |  |  |  |
| 172.2  | 18 | 20 | 35 | 0  | 198 | 134 | 63  | 105 | 1757 | 572 | 441 |  |  |  |  |  |  |  |
| 172.31 | 0  | 11 | 33 | 0  | 222 | 104 | 111 | 226 | 2801 | 211 | 789 |  |  |  |  |  |  |  |
| 172.41 | 16 | 24 | 30 | 0  | 313 | 134 | 396 | 270 | 2875 | 58  | 892 |  |  |  |  |  |  |  |
| 172.51 | 18 | 10 | 25 | 0  | 259 | 84  | 237 | 419 | 2322 | 0   | 682 |  |  |  |  |  |  |  |

|        |    |    |    |    |     |     |     |     |      |     |     |  |  |  |  |  |  |  |  |
|--------|----|----|----|----|-----|-----|-----|-----|------|-----|-----|--|--|--|--|--|--|--|--|
| 172.61 | 0  | 15 | 18 | 0  | 227 | 143 | 227 | 318 | 2043 | 0   | 577 |  |  |  |  |  |  |  |  |
| 172.71 | 29 | 7  | 40 | 0  | 218 | 90  | 187 | 209 | 2171 | 236 | 572 |  |  |  |  |  |  |  |  |
| 172.81 | 0  | 0  | 37 | 0  | 280 | 58  | 45  | 110 | 2237 | 213 | 589 |  |  |  |  |  |  |  |  |
| 172.91 | 0  | 5  | 32 | 0  | 267 | 84  | 178 | 43  | 2288 | 363 | 604 |  |  |  |  |  |  |  |  |
| 173.01 | 0  | 0  | 28 | 0  | 292 | 100 | 158 | 68  | 2309 | 316 | 571 |  |  |  |  |  |  |  |  |
| 173.11 | 10 | 0  | 25 | 0  | 286 | 91  | 115 | 176 | 2467 | 477 | 585 |  |  |  |  |  |  |  |  |
| 173.21 | 0  | 10 | 17 | 0  | 266 | 159 | 190 | 114 | 2648 | 188 | 639 |  |  |  |  |  |  |  |  |
| 173.3  | 0  | 0  | 24 | 0  | 340 | 187 | 139 | 240 | 2680 | 382 | 670 |  |  |  |  |  |  |  |  |
| 173.41 | 0  | 0  | 31 | 0  | 303 | 119 | 175 | 236 | 2746 | 279 | 685 |  |  |  |  |  |  |  |  |
| 173.51 | 20 | 7  | 24 | 0  | 246 | 59  | 285 | 269 | 2821 | 258 | 810 |  |  |  |  |  |  |  |  |
| 173.61 | 5  | 0  | 33 | 0  | 347 | 70  | 178 | 351 | 2692 | 55  | 783 |  |  |  |  |  |  |  |  |
| 173.71 | 0  | 30 | 29 | 0  | 228 | 95  | 197 | 334 | 2346 | 0   | 740 |  |  |  |  |  |  |  |  |
| 173.81 | 32 | 8  | 42 | 0  | 261 | 52  | 246 | 135 | 2208 | 176 | 557 |  |  |  |  |  |  |  |  |
| 173.91 | 5  | 15 | 33 | 0  | 273 | 57  | 226 | 168 | 2410 | 357 | 623 |  |  |  |  |  |  |  |  |
| 174    | 12 | 8  | 41 | 13 | 278 | 99  | 201 | 160 | 2461 | 365 | 662 |  |  |  |  |  |  |  |  |
| 174.11 | 8  | 7  | 39 | 0  | 281 | 88  | 187 | 159 | 2489 | 338 | 703 |  |  |  |  |  |  |  |  |
| 174.21 | 20 | 23 | 41 | 0  | 267 | 107 | 98  | 63  | 2593 | 481 | 686 |  |  |  |  |  |  |  |  |
| 174.3  | 0  | 10 | 6  | 0  | 266 | 63  | 145 | 169 | 2729 | 373 | 677 |  |  |  |  |  |  |  |  |
| 174.41 | 14 | 7  | 41 | 0  | 280 | 156 | 89  | 91  | 2724 | 200 | 655 |  |  |  |  |  |  |  |  |
| 174.51 | 0  | 5  | 36 | 0  | 289 | 74  | 192 | 233 | 2901 | 384 | 701 |  |  |  |  |  |  |  |  |
| 174.6  | 0  | 21 | 42 | 13 | 293 | 40  | 186 | 264 | 2856 | 121 | 780 |  |  |  |  |  |  |  |  |
| 174.71 | 10 | 14 | 42 | 0  | 290 | 57  | 262 | 454 | 2531 | 0   | 752 |  |  |  |  |  |  |  |  |
| 174.8  | 0  | 11 | 8  | 0  | 291 | 89  | 232 | 207 | 2286 | 72  | 692 |  |  |  |  |  |  |  |  |
| 174.91 | 0  | 0  | 41 | 0  | 305 | 93  | 237 | 198 | 2327 | 176 | 606 |  |  |  |  |  |  |  |  |
| 175    | 14 | 7  | 9  | 0  | 301 | 21  | 207 | 195 | 2492 | 296 | 578 |  |  |  |  |  |  |  |  |
| 175.11 | 0  | 21 | 25 | 0  | 297 | 86  | 76  | 150 | 2615 | 179 | 595 |  |  |  |  |  |  |  |  |
| 175.21 | 0  | 0  | 12 | 0  | 325 | 39  | 158 | 195 | 2650 | 322 | 602 |  |  |  |  |  |  |  |  |
| 175.31 | 0  | 10 | 20 | 21 | 308 | 68  | 164 | 163 | 2727 | 409 | 553 |  |  |  |  |  |  |  |  |
| 175.41 | 12 | 19 | 11 | 0  | 365 | 107 | 100 | 217 | 2713 | 477 | 618 |  |  |  |  |  |  |  |  |
| 175.51 | 0  | 25 | 38 | 0  | 302 | 140 | 182 | 167 | 2703 | 528 | 616 |  |  |  |  |  |  |  |  |
| 175.61 | 8  | 0  | 27 | 0  | 269 | 148 | 117 | 198 | 2989 | 408 | 681 |  |  |  |  |  |  |  |  |
| 175.71 | 18 | 31 | 39 | 0  | 280 | 68  | 177 | 169 | 2980 | 105 | 695 |  |  |  |  |  |  |  |  |
| 175.8  | 0  | 7  | 20 | 0  | 328 | 23  | 184 | 292 | 2736 | 0   | 766 |  |  |  |  |  |  |  |  |
| 175.91 | 7  | 23 | 17 | 9  | 337 | 100 | 268 | 268 | 2447 | 76  | 748 |  |  |  |  |  |  |  |  |
| 176.01 | 12 | 20 | 47 | 0  | 284 | 49  | 279 | 338 | 2236 | 0   | 663 |  |  |  |  |  |  |  |  |
| 176.1  | 0  | 14 | 56 | 0  | 240 | 44  | 194 | 285 | 2196 | 77  | 633 |  |  |  |  |  |  |  |  |
| 176.21 | 0  | 0  | 39 | 0  | 294 | 60  | 211 | 231 | 2251 | 29  | 597 |  |  |  |  |  |  |  |  |
| 176.31 | 0  | 5  | 17 | 11 | 266 | 95  | 153 | 169 | 2340 | 313 | 566 |  |  |  |  |  |  |  |  |
| 176.41 | 32 | 5  | 15 | 0  | 299 | 69  | 67  | 228 | 2476 | 325 | 534 |  |  |  |  |  |  |  |  |
| 176.5  | 10 | 9  | 28 | 0  | 305 | 170 | 71  | 178 | 2641 | 383 | 594 |  |  |  |  |  |  |  |  |
| 176.61 | 25 | 22 | 38 | 0  | 334 | 100 | 84  | 108 | 2607 | 318 | 649 |  |  |  |  |  |  |  |  |
| 176.71 | 15 | 19 | 33 | 0  | 328 | 83  | 46  | 47  | 2753 | 384 | 664 |  |  |  |  |  |  |  |  |
| 176.81 | 0  | 0  | 16 | 6  | 381 | 174 | 35  | 88  | 2841 | 457 | 622 |  |  |  |  |  |  |  |  |
| 176.91 | 20 | 5  | 30 | 5  | 370 | 159 | 151 | 158 | 2905 | 429 | 643 |  |  |  |  |  |  |  |  |
| 177    | 0  | 23 | 63 | 22 | 371 | 111 | 204 | 146 | 3055 | 282 | 630 |  |  |  |  |  |  |  |  |
| 177.1  | 0  | 24 | 47 | 17 | 378 | 160 | 157 | 154 | 3349 | 302 | 743 |  |  |  |  |  |  |  |  |
| 177.21 | 0  | 0  | 15 | 0  | 349 | 79  | 221 | 245 | 3247 | 417 | 810 |  |  |  |  |  |  |  |  |
| 177.31 | 28 | 0  | 34 | 0  | 382 | 60  | 225 | 358 | 3204 | 162 | 732 |  |  |  |  |  |  |  |  |
| 177.41 | 10 | 28 | 14 | 0  | 326 | 68  | 197 | 271 | 2841 | 0   | 776 |  |  |  |  |  |  |  |  |
| 177.51 | 4  | 22 | 30 | 0  | 322 | 0   | 180 | 204 | 2452 | 0   | 725 |  |  |  |  |  |  |  |  |
| 177.6  | 0  | 6  | 38 | 4  | 350 | 76  | 186 | 222 | 2445 | 0   | 660 |  |  |  |  |  |  |  |  |
| 177.71 | 15 | 23 | 38 | 0  | 327 | 43  | 228 | 209 | 2268 | 166 | 562 |  |  |  |  |  |  |  |  |
| 177.81 | 10 | 0  | 27 | 0  | 291 | 82  | 172 | 171 | 2261 | 283 | 526 |  |  |  |  |  |  |  |  |
| 177.91 | 18 | 4  | 36 | 0  | 290 | 89  | 105 | 148 | 2297 | 300 | 554 |  |  |  |  |  |  |  |  |
| 178    | 0  | 12 | 28 | 0  | 317 | 70  | 67  | 177 | 2446 | 230 | 630 |  |  |  |  |  |  |  |  |
| 178.11 | 13 | 18 | 39 | 0  | 358 | 117 | 140 | 232 | 2646 | 476 | 686 |  |  |  |  |  |  |  |  |
| 178.21 | 7  | 8  | 43 | 0  | 337 | 137 | 8   | 157 | 2807 | 264 | 638 |  |  |  |  |  |  |  |  |
| 178.3  | 27 | 6  | 35 | 0  | 329 | 80  | 50  | 116 | 2595 | 536 | 587 |  |  |  |  |  |  |  |  |

|        |    |    |    |    |     |     |     |     |      |     |     |  |  |  |  |  |  |  |
|--------|----|----|----|----|-----|-----|-----|-----|------|-----|-----|--|--|--|--|--|--|--|
| 178.41 | 0  | 23 | 22 | 0  | 327 | 88  | 106 | 122 | 2725 | 442 | 572 |  |  |  |  |  |  |  |
| 178.5  | 10 | 0  | 33 | 0  | 360 | 92  | 119 | 131 | 2874 | 267 | 677 |  |  |  |  |  |  |  |
| 178.61 | 0  | 0  | 27 | 0  | 384 | 102 | 53  | 68  | 3011 | 292 | 624 |  |  |  |  |  |  |  |
| 178.71 | 0  | 14 | 28 | 18 | 359 | 103 | 113 | 164 | 2843 | 547 | 655 |  |  |  |  |  |  |  |
| 178.8  | 12 | 0  | 18 | 0  | 330 | 61  | 63  | 210 | 2908 | 354 | 659 |  |  |  |  |  |  |  |
| 178.91 | 0  | 9  | 57 | 0  | 415 | 156 | 113 | 124 | 3152 | 211 | 685 |  |  |  |  |  |  |  |
| 179.01 | 8  | 0  | 24 | 0  | 368 | 104 | 229 | 157 | 3042 | 218 | 789 |  |  |  |  |  |  |  |
| 179.11 | 20 | 14 | 30 | 0  | 328 | 108 | 262 | 346 | 2679 | 40  | 669 |  |  |  |  |  |  |  |
| 179.21 | 14 | 0  | 32 | 0  | 393 | 87  | 285 | 267 | 2477 | 0   | 633 |  |  |  |  |  |  |  |
| 179.31 | 40 | 32 | 37 | 0  | 356 | 30  | 202 | 299 | 2179 | 0   | 649 |  |  |  |  |  |  |  |
| 179.41 | 0  | 12 | 24 | 0  | 298 | 11  | 213 | 288 | 2080 | 65  | 652 |  |  |  |  |  |  |  |
| 179.51 | 18 | 12 | 39 | 18 | 343 | 57  | 246 | 230 | 2199 | 63  | 507 |  |  |  |  |  |  |  |
| 179.6  | 14 | 27 | 33 | 0  | 396 | 63  | 135 | 68  | 2382 | 145 | 554 |  |  |  |  |  |  |  |
| 179.71 | 0  | 6  | 25 | 0  | 342 | 75  | 103 | 206 | 2651 | 173 | 673 |  |  |  |  |  |  |  |
| 179.8  | 14 | 0  | 26 | 0  | 357 | 101 | 118 | 192 | 2858 | 279 | 731 |  |  |  |  |  |  |  |
| 179.91 | 8  | 30 | 15 | 0  | 351 | 90  | 126 | 101 | 2898 | 399 | 699 |  |  |  |  |  |  |  |
| 180.01 | 8  | 26 | 18 | 5  | 373 | 121 | 115 | 306 | 2947 | 230 | 717 |  |  |  |  |  |  |  |
| 180.11 | 0  | 0  | 27 | 0  | 372 | 132 | 45  | 21  | 2839 | 340 | 686 |  |  |  |  |  |  |  |
| 180.21 | 0  | 32 | 29 | 0  | 356 | 63  | 115 | 28  | 2956 | 361 | 647 |  |  |  |  |  |  |  |
| 180.31 | 13 | 21 | 38 | 0  | 428 | 48  | 171 | 195 | 3033 | 280 | 734 |  |  |  |  |  |  |  |
| 180.41 | 4  | 25 | 43 | 0  | 434 | 124 | 116 | 202 | 3020 | 178 | 774 |  |  |  |  |  |  |  |
| 180.51 | 0  | 0  | 33 | 0  | 319 | 118 | 202 | 274 | 2644 | 125 | 661 |  |  |  |  |  |  |  |
| 180.6  | 0  | 0  | 19 | 0  | 359 | 39  | 133 | 238 | 2394 | 0   | 650 |  |  |  |  |  |  |  |
| 180.71 | 0  | 24 | 26 | 0  | 328 | 42  | 149 | 247 | 2043 | 0   | 683 |  |  |  |  |  |  |  |
| 180.81 | 0  | 17 | 32 | 0  | 318 | 64  | 286 | 245 | 1941 | 28  | 568 |  |  |  |  |  |  |  |
| 180.91 | 18 | 38 | 38 | 0  | 302 | 63  | 120 | 209 | 1904 | 63  | 540 |  |  |  |  |  |  |  |
| 181.01 | 14 | 21 | 24 | 0  | 280 | 89  | 190 | 179 | 1943 | 357 | 545 |  |  |  |  |  |  |  |
| 181.11 | 8  | 10 | 25 | 0  | 300 | 50  | 35  | 169 | 2295 | 110 | 603 |  |  |  |  |  |  |  |
| 181.21 | 27 | 10 | 42 | 0  | 278 | 81  | 118 | 185 | 2379 | 289 | 653 |  |  |  |  |  |  |  |
| 181.31 | 5  | 0  | 13 | 0  | 360 | 134 | 81  | 164 | 2476 | 332 | 697 |  |  |  |  |  |  |  |
| 181.41 | 27 | 12 | 15 | 0  | 359 | 88  | 117 | 95  | 2656 | 315 | 684 |  |  |  |  |  |  |  |
| 181.51 | 0  | 32 | 33 | 0  | 401 | 121 | 98  | 115 | 2687 | 233 | 665 |  |  |  |  |  |  |  |
| 181.6  | 18 | 31 | 55 | 0  | 413 | 54  | 88  | 173 | 2747 | 233 | 616 |  |  |  |  |  |  |  |
| 181.71 | 0  | 0  | 53 | 17 | 431 | 118 | 88  | 171 | 2829 | 315 | 633 |  |  |  |  |  |  |  |
| 181.8  | 0  | 32 | 51 | 0  | 374 | 64  | 132 | 89  | 2983 | 392 | 645 |  |  |  |  |  |  |  |
| 181.91 | 11 | 0  | 53 | 25 | 360 | 55  | 112 | 282 | 2810 | 212 | 711 |  |  |  |  |  |  |  |
| 182    | 0  | 0  | 0  | 0  | 389 | 18  | 222 | 321 | 2466 | 116 | 663 |  |  |  |  |  |  |  |
| 182.11 | 0  | 6  | 18 | 0  | 320 | 133 | 198 | 271 | 2236 | 0   | 676 |  |  |  |  |  |  |  |
| 182.2  | 18 | 6  | 29 | 0  | 302 | 8   | 250 | 361 | 2039 | 0   | 666 |  |  |  |  |  |  |  |
| 182.31 | 5  | 12 | 36 | 0  | 290 | 59  | 210 | 301 | 2086 | 0   | 662 |  |  |  |  |  |  |  |
| 182.4  | 12 | 0  | 13 | 0  | 306 | 73  | 271 | 253 | 2118 | 82  | 690 |  |  |  |  |  |  |  |
| 182.51 | 39 | 18 | 58 | 0  | 320 | 80  | 108 | 315 | 2379 | 168 | 663 |  |  |  |  |  |  |  |
| 182.61 | 0  | 0  | 21 | 11 | 345 | 50  | 104 | 122 | 2296 | 220 | 649 |  |  |  |  |  |  |  |
| 182.71 | 8  | 20 | 39 | 0  | 312 | 113 | 52  | 132 | 2318 | 209 | 659 |  |  |  |  |  |  |  |
| 182.81 | 10 | 23 | 38 | 0  | 386 | 59  | 103 | 114 | 2588 | 381 | 602 |  |  |  |  |  |  |  |
| 182.91 | 11 | 21 | 40 | 17 | 321 | 81  | 72  | 106 | 2855 | 608 | 707 |  |  |  |  |  |  |  |
| 183.01 | 8  | 0  | 22 | 0  | 386 | 45  | 90  | 65  | 2941 | 332 | 708 |  |  |  |  |  |  |  |
| 183.1  | 0  | 13 | 27 | 0  | 408 | 22  | 102 | 17  | 3010 | 309 | 700 |  |  |  |  |  |  |  |
| 183.21 | 19 | 16 | 41 | 0  | 389 | 94  | 119 | 116 | 3206 | 366 | 726 |  |  |  |  |  |  |  |
| 183.31 | 25 | 21 | 24 | 0  | 425 | 38  | 167 | 258 | 3340 | 457 | 824 |  |  |  |  |  |  |  |
| 183.4  | 0  | 6  | 9  | 0  | 458 | 59  | 183 | 268 | 3176 | 233 | 813 |  |  |  |  |  |  |  |
| 183.51 | 0  | 10 | 38 | 0  | 366 | 57  | 252 | 283 | 2985 | 64  | 739 |  |  |  |  |  |  |  |
| 183.6  | 4  | 32 | 23 | 5  | 348 | 75  | 254 | 235 | 2868 | 131 | 752 |  |  |  |  |  |  |  |
| 183.71 | 0  | 0  | 8  | 0  | 432 | 101 | 255 | 198 | 2713 | 208 | 694 |  |  |  |  |  |  |  |
| 183.81 | 11 | 24 | 32 | 5  | 441 | 74  | 221 | 169 | 2763 | 375 | 684 |  |  |  |  |  |  |  |
| 183.91 | 11 | 8  | 19 | 0  | 390 | 93  | 177 | 193 | 2902 | 212 | 681 |  |  |  |  |  |  |  |
| 184.01 | 9  | 22 | 49 | 0  | 444 | 100 | 150 | 60  | 3021 | 347 | 692 |  |  |  |  |  |  |  |
| 184.11 | 0  | 22 | 26 | 15 | 402 | 97  | 79  | 162 | 3069 | 316 | 787 |  |  |  |  |  |  |  |

|        |    |    |    |    |     |     |     |     |      |     |     |  |  |  |  |  |  |  |
|--------|----|----|----|----|-----|-----|-----|-----|------|-----|-----|--|--|--|--|--|--|--|
| 184.21 | 0  | 0  | 37 | 0  | 411 | 64  | 172 | 219 | 2811 | 84  | 826 |  |  |  |  |  |  |  |
| 184.31 | 6  | 43 | 40 | 0  | 314 | 27  | 185 | 311 | 2436 | 75  | 769 |  |  |  |  |  |  |  |
| 184.41 | 15 | 27 | 34 | 0  | 333 | 43  | 266 | 288 | 2272 | 0   | 646 |  |  |  |  |  |  |  |
| 184.51 | 30 | 30 | 23 | 0  | 339 | 56  | 160 | 296 | 2144 | 265 | 727 |  |  |  |  |  |  |  |
| 184.61 | 11 | 17 | 15 | 25 | 352 | 83  | 198 | 310 | 2412 | 261 | 661 |  |  |  |  |  |  |  |
| 184.71 | 20 | 16 | 32 | 0  | 356 | 85  | 183 | 202 | 2526 | 275 | 775 |  |  |  |  |  |  |  |
| 184.81 | 15 | 0  | 30 | 0  | 357 | 71  | 137 | 126 | 2626 | 308 | 726 |  |  |  |  |  |  |  |
| 184.91 | 0  | 0  | 28 | 0  | 371 | 65  | 112 | 169 | 2589 | 276 | 705 |  |  |  |  |  |  |  |
| 185.01 | 0  | 0  | 46 | 0  | 319 | 130 | 107 | 146 | 2577 | 246 | 714 |  |  |  |  |  |  |  |
| 185.11 | 25 | 0  | 34 | 0  | 400 | 127 | 180 | 105 | 2671 | 333 | 700 |  |  |  |  |  |  |  |
| 185.21 | 24 | 12 | 48 | 0  | 415 | 118 | 118 | 109 | 2785 | 451 | 702 |  |  |  |  |  |  |  |
| 185.3  | 20 | 6  | 22 | 0  | 402 | 74  | 136 | 372 | 2823 | 309 | 718 |  |  |  |  |  |  |  |
| 185.41 | 17 | 27 | 39 | 0  | 408 | 138 | 94  | 232 | 2956 | 358 | 629 |  |  |  |  |  |  |  |
| 185.51 | 12 | 39 | 46 | 0  | 436 | 55  | 129 | 111 | 2986 | 465 | 708 |  |  |  |  |  |  |  |
| 185.61 | 0  | 0  | 18 | 0  | 431 | 80  | 179 | 185 | 3225 | 180 | 722 |  |  |  |  |  |  |  |
| 185.71 | 4  | 8  | 20 | 0  | 407 | 66  | 137 | 157 | 3057 | 231 | 777 |  |  |  |  |  |  |  |
| 185.81 | 10 | 35 | 26 | 0  | 376 | 65  | 302 | 357 | 2823 | 0   | 755 |  |  |  |  |  |  |  |
| 185.91 | 0  | 0  | 30 | 0  | 403 | 16  | 260 | 282 | 2289 | 17  | 647 |  |  |  |  |  |  |  |
| 186.01 | 4  | 19 | 32 | 0  | 370 | 88  | 257 | 272 | 2193 | 0   | 620 |  |  |  |  |  |  |  |
| 186.1  | 0  | 0  | 26 | 0  | 354 | 66  | 275 | 242 | 2065 | 119 | 620 |  |  |  |  |  |  |  |
| 186.21 | 22 | 7  | 34 | 27 | 338 | 118 | 257 | 258 | 2330 | 291 | 589 |  |  |  |  |  |  |  |
| 186.3  | 0  | 0  | 22 | 0  | 363 | 113 | 191 | 218 | 2411 | 400 | 624 |  |  |  |  |  |  |  |
| 186.41 | 13 | 0  | 16 | 0  | 394 | 165 | 131 | 97  | 2512 | 275 | 693 |  |  |  |  |  |  |  |
| 186.5  | 0  | 10 | 39 | 0  | 388 | 70  | 145 | 313 | 2601 | 237 | 692 |  |  |  |  |  |  |  |
| 186.61 | 18 | 10 | 48 | 0  | 337 | 134 | 197 | 168 | 2633 | 483 | 738 |  |  |  |  |  |  |  |
| 186.7  | 13 | 25 | 36 | 30 | 398 | 98  | 127 | 71  | 2828 | 270 | 666 |  |  |  |  |  |  |  |
| 186.81 | 16 | 24 | 35 | 0  | 407 | 62  | 101 | 84  | 2658 | 177 | 756 |  |  |  |  |  |  |  |
| 186.91 | 10 | 45 | 30 | 0  | 377 | 110 | 97  | 152 | 2771 | 321 | 725 |  |  |  |  |  |  |  |
| 187.01 | 23 | 21 | 30 | 0  | 344 | 91  | 84  | 108 | 2932 | 101 | 740 |  |  |  |  |  |  |  |
| 187.11 | 15 | 18 | 24 | 0  | 422 | 110 | 169 | 181 | 2984 | 35  | 844 |  |  |  |  |  |  |  |
| 187.21 | 11 | 0  | 35 | 0  | 413 | 99  | 201 | 278 | 2803 | 89  | 884 |  |  |  |  |  |  |  |
| 187.31 | 5  | 25 | 40 | 0  | 400 | 11  | 213 | 236 | 2654 | 0   | 795 |  |  |  |  |  |  |  |
| 187.41 | 9  | 18 | 38 | 0  | 376 | 83  | 102 | 363 | 2418 | 0   | 859 |  |  |  |  |  |  |  |
| 187.51 | 10 | 0  | 15 | 0  | 421 | 102 | 279 | 197 | 2475 | 104 | 797 |  |  |  |  |  |  |  |
| 187.61 | 0  | 14 | 31 | 0  | 316 | 59  | 138 | 143 | 2511 | 178 | 755 |  |  |  |  |  |  |  |
| 187.71 | 0  | 0  | 16 | 0  | 382 | 47  | 119 | 234 | 2607 | 69  | 736 |  |  |  |  |  |  |  |
| 187.81 | 16 | 6  | 22 | 0  | 377 | 57  | 197 | 146 | 2738 | 316 | 661 |  |  |  |  |  |  |  |
| 187.91 | 0  | 21 | 43 | 0  | 370 | 81  | 24  | 85  | 2696 | 489 | 735 |  |  |  |  |  |  |  |
| 188.01 | 18 | 8  | 55 | 0  | 379 | 94  | 220 | 62  | 2919 | 408 | 774 |  |  |  |  |  |  |  |
| 188.11 | 0  | 27 | 28 | 0  | 405 | 105 | 161 | 84  | 3026 | 377 | 844 |  |  |  |  |  |  |  |
| 188.21 | 0  | 9  | 21 | 0  | 375 | 58  | 225 | 219 | 2873 | 204 | 820 |  |  |  |  |  |  |  |
| 188.3  | 5  | 0  | 14 | 0  | 345 | 26  | 157 | 329 | 2853 | 0   | 808 |  |  |  |  |  |  |  |
| 188.41 | 14 | 8  | 14 | 0  | 408 | 18  | 244 | 312 | 2784 | 109 | 747 |  |  |  |  |  |  |  |
| 188.51 | 10 | 27 | 25 | 0  | 386 | 59  | 283 | 253 | 2556 | 230 | 648 |  |  |  |  |  |  |  |
| 188.61 | 5  | 23 | 49 | 0  | 360 | 23  | 187 | 242 | 2431 | 64  | 713 |  |  |  |  |  |  |  |
| 188.71 | 0  | 4  | 29 | 0  | 360 | 25  | 151 | 307 | 2589 | 68  | 778 |  |  |  |  |  |  |  |
| 188.81 | 12 | 15 | 28 | 0  | 350 | 99  | 248 | 227 | 2717 | 307 | 759 |  |  |  |  |  |  |  |
| 188.91 | 0  | 12 | 29 | 0  | 393 | 68  | 113 | 182 | 2812 | 73  | 668 |  |  |  |  |  |  |  |
| 189.01 | 0  | 0  | 34 | 0  | 376 | 61  | 159 | 255 | 2660 | 415 | 659 |  |  |  |  |  |  |  |
| 189.11 | 0  | 0  | 35 | 0  | 374 | 118 | 170 | 83  | 2502 | 425 | 720 |  |  |  |  |  |  |  |
| 189.21 | 7  | 0  | 52 | 0  | 377 | 106 | 96  | 74  | 2633 | 391 | 690 |  |  |  |  |  |  |  |
| 189.31 | 0  | 0  | 29 | 0  | 356 | 92  | 121 | 22  | 2617 | 398 | 753 |  |  |  |  |  |  |  |
| 189.41 | 7  | 22 | 48 | 0  | 398 | 83  | 83  | 107 | 2840 | 318 | 750 |  |  |  |  |  |  |  |
| 189.5  | 0  | 24 | 25 | 0  | 392 | 55  | 50  | 90  | 2983 | 333 | 728 |  |  |  |  |  |  |  |
| 189.61 | 8  | 0  | 20 | 0  | 368 | 110 | 130 | 227 | 3092 | 269 | 868 |  |  |  |  |  |  |  |
| 189.71 | 0  | 4  | 24 | 0  | 429 | 51  | 243 | 280 | 3088 | 0   | 795 |  |  |  |  |  |  |  |
| 189.81 | 21 | 9  | 32 | 0  | 391 | 23  | 279 | 228 | 2793 | 116 | 696 |  |  |  |  |  |  |  |
| 189.91 | 29 | 24 | 22 | 25 | 379 | 57  | 246 | 344 | 2442 | 0   | 592 |  |  |  |  |  |  |  |

|        |    |    |    |    |     |     |     |     |      |     |     |  |  |  |  |  |  |  |  |
|--------|----|----|----|----|-----|-----|-----|-----|------|-----|-----|--|--|--|--|--|--|--|--|
| 190.01 | 0  | 17 | 34 | 0  | 334 | 58  | 297 | 269 | 2232 | 0   | 561 |  |  |  |  |  |  |  |  |
| 190.11 | 30 | 8  | 24 | 0  | 344 | 84  | 54  | 209 | 2310 | 49  | 634 |  |  |  |  |  |  |  |  |
| 190.21 | 17 | 0  | 31 | 0  | 226 | 95  | 121 | 192 | 2409 | 210 | 716 |  |  |  |  |  |  |  |  |
| 190.31 | 0  | 0  | 47 | 0  | 376 | 97  | 135 | 116 | 2503 | 406 | 779 |  |  |  |  |  |  |  |  |
| 190.41 | 7  | 28 | 45 | 24 | 263 | 42  | 127 | 182 | 2478 | 389 | 662 |  |  |  |  |  |  |  |  |
| 190.51 | 0  | 19 | 40 | 0  | 345 | 56  | 134 | 178 | 2559 | 392 | 651 |  |  |  |  |  |  |  |  |
| 190.61 | 16 | 5  | 11 | 0  | 359 | 69  | 106 | 86  | 2574 | 485 | 662 |  |  |  |  |  |  |  |  |
| 190.71 | 0  | 4  | 30 | 0  | 363 | 77  | 166 | 103 | 2865 | 353 | 685 |  |  |  |  |  |  |  |  |
| 190.81 | 0  | 16 | 18 | 4  | 375 | 84  | 111 | 193 | 2853 | 434 | 710 |  |  |  |  |  |  |  |  |
| 190.9  | 10 | 8  | 40 | 0  | 365 | 58  | 127 | 227 | 3071 | 308 | 660 |  |  |  |  |  |  |  |  |
| 191.01 | 31 | 24 | 56 | 9  | 424 | 101 | 124 | 126 | 3066 | 330 | 640 |  |  |  |  |  |  |  |  |
| 191.11 | 23 | 7  | 32 | 0  | 411 | 124 | 143 | 83  | 3185 | 219 | 718 |  |  |  |  |  |  |  |  |
| 191.21 | 21 | 14 | 30 | 0  | 416 | 107 | 199 | 210 | 3307 | 329 | 659 |  |  |  |  |  |  |  |  |
| 191.3  | 0  | 15 | 33 | 0  | 532 | 64  | 183 | 293 | 3136 | 0   | 642 |  |  |  |  |  |  |  |  |
| 191.41 | 25 | 24 | 21 | 6  | 436 | 26  | 261 | 357 | 2833 | 122 | 625 |  |  |  |  |  |  |  |  |
| 191.51 | 6  | 19 | 14 | 0  | 411 | 122 | 282 | 212 | 2580 | 0   | 540 |  |  |  |  |  |  |  |  |
| 191.61 | 4  | 0  | 28 | 0  | 401 | 50  | 227 | 239 | 2517 | 104 | 558 |  |  |  |  |  |  |  |  |
| 191.7  | 0  | 12 | 31 | 0  | 368 | 95  | 128 | 221 | 2461 | 307 | 567 |  |  |  |  |  |  |  |  |
| 191.81 | 24 | 18 | 26 | 0  | 325 | 42  | 88  | 164 | 2562 | 185 | 458 |  |  |  |  |  |  |  |  |
| 191.91 | 26 | 9  | 30 | 40 | 359 | 89  | 137 | 193 | 2704 | 357 | 481 |  |  |  |  |  |  |  |  |
| 192    | 11 | 0  | 28 | 0  | 371 | 52  | 151 | 50  | 2676 | 303 | 499 |  |  |  |  |  |  |  |  |
| 192.11 | 8  | 5  | 32 | 0  | 392 | 84  | 100 | 61  | 2771 | 334 | 511 |  |  |  |  |  |  |  |  |
| 192.2  | 0  | 9  | 38 | 0  | 397 | 80  | 127 | 156 | 2886 | 292 | 503 |  |  |  |  |  |  |  |  |
| 192.31 | 33 | 0  | 30 | 0  | 473 | 88  | 171 | 37  | 2986 | 237 | 506 |  |  |  |  |  |  |  |  |
| 192.41 | 8  | 22 | 30 | 0  | 339 | 62  | 137 | 106 | 3039 | 278 | 555 |  |  |  |  |  |  |  |  |
| 192.51 | 14 | 23 | 25 | 0  | 466 | 146 | 126 | 171 | 3157 | 482 | 508 |  |  |  |  |  |  |  |  |
| 192.61 | 30 | 34 | 37 | 0  | 395 | 81  | 190 | 131 | 3171 | 268 | 564 |  |  |  |  |  |  |  |  |
| 192.71 | 0  | 0  | 37 | 0  | 430 | 36  | 222 | 253 | 2979 | 0   | 539 |  |  |  |  |  |  |  |  |
| 192.81 | 0  | 6  | 25 | 0  | 368 | 34  | 300 | 354 | 2835 | 0   | 518 |  |  |  |  |  |  |  |  |
| 192.91 | 9  | 10 | 34 | 0  | 392 | 33  | 263 | 325 | 2688 | 0   | 448 |  |  |  |  |  |  |  |  |
| 193    | 10 | 8  | 11 | 12 | 335 | 68  | 294 | 278 | 2569 | 0   | 505 |  |  |  |  |  |  |  |  |
| 193.11 | 0  | 0  | 0  | 0  | 363 | 0   | 222 | 321 | 2572 | 22  | 450 |  |  |  |  |  |  |  |  |
| 193.21 | 7  | 9  | 28 | 0  | 387 | 38  | 291 | 321 | 2644 | 0   | 454 |  |  |  |  |  |  |  |  |
| 193.31 | 0  | 0  | 15 | 0  | 395 | 54  | 205 | 181 | 2777 | 117 | 497 |  |  |  |  |  |  |  |  |
| 193.41 | 17 | 7  | 24 | 0  | 363 | 64  | 205 | 194 | 2704 | 179 | 486 |  |  |  |  |  |  |  |  |
| 193.51 | 7  | 0  | 40 | 0  | 419 | 122 | 101 | 234 | 2809 | 259 | 535 |  |  |  |  |  |  |  |  |
| 193.61 | 9  | 12 | 24 | 0  | 466 | 119 | 67  | 111 | 2871 | 211 | 510 |  |  |  |  |  |  |  |  |
| 193.71 | 12 | 5  | 9  | 0  | 452 | 144 | 137 | 150 | 3023 | 264 | 512 |  |  |  |  |  |  |  |  |
| 193.81 | 21 | 11 | 33 | 19 | 412 | 28  | 99  | 133 | 3026 | 320 | 506 |  |  |  |  |  |  |  |  |
| 193.91 | 0  | 0  | 9  | 0  | 395 | 125 | 151 | 102 | 3136 | 599 | 497 |  |  |  |  |  |  |  |  |
| 194.01 | 10 | 11 | 22 | 0  | 444 | 76  | 51  | 174 | 3059 | 285 | 566 |  |  |  |  |  |  |  |  |
| 194.11 | 0  | 20 | 20 | 0  | 437 | 107 | 139 | 295 | 3114 | 231 | 527 |  |  |  |  |  |  |  |  |
| 194.21 | 0  | 0  | 42 | 0  | 413 | 90  | 168 | 97  | 3206 | 332 | 532 |  |  |  |  |  |  |  |  |
| 194.3  | 0  | 9  | 21 | 0  | 392 | 98  | 133 | 153 | 3329 | 366 | 493 |  |  |  |  |  |  |  |  |
| 194.41 | 14 | 17 | 29 | 0  | 498 | 100 | 106 | 122 | 3349 | 404 | 543 |  |  |  |  |  |  |  |  |
| 194.51 | 14 | 5  | 20 | 0  | 457 | 87  | 107 | 150 | 3285 | 436 | 550 |  |  |  |  |  |  |  |  |
| 194.61 | 0  | 16 | 54 | 0  | 384 | 82  | 190 | 146 | 3603 | 291 | 584 |  |  |  |  |  |  |  |  |
| 194.71 | 0  | 0  | 26 | 0  | 481 | 82  | 96  | 165 | 3540 | 149 | 502 |  |  |  |  |  |  |  |  |
| 194.81 | 24 | 0  | 38 | 0  | 459 | 73  | 97  | 198 | 3673 | 235 | 581 |  |  |  |  |  |  |  |  |
| 194.91 | 0  | 0  | 13 | 0  | 488 | 118 | 192 | 311 | 3556 | 171 | 557 |  |  |  |  |  |  |  |  |
| 195.01 | 15 | 0  | 43 | 9  | 425 | 14  | 215 | 411 | 3147 | 0   | 536 |  |  |  |  |  |  |  |  |
| 195.11 | 5  | 0  | 13 | 0  | 459 | 91  | 308 | 362 | 2780 | 0   | 471 |  |  |  |  |  |  |  |  |
| 195.21 | 0  | 6  | 28 | 0  | 424 | 56  | 242 | 401 | 2589 | 60  | 473 |  |  |  |  |  |  |  |  |
| 195.31 | 0  | 10 | 4  | 0  | 434 | 27  | 260 | 426 | 2491 | 157 | 477 |  |  |  |  |  |  |  |  |
| 195.41 | 12 | 0  | 38 | 0  | 371 | 94  | 255 | 210 | 2728 | 127 | 523 |  |  |  |  |  |  |  |  |
| 195.5  | 4  | 15 | 0  | 0  | 420 | 50  | 118 | 218 | 2872 | 24  | 492 |  |  |  |  |  |  |  |  |
| 195.61 | 23 | 24 | 26 | 0  | 408 | 68  | 203 | 273 | 3071 | 107 | 474 |  |  |  |  |  |  |  |  |
| 195.7  | 23 | 23 | 24 | 0  | 431 | 72  | 222 | 218 | 2988 | 164 | 527 |  |  |  |  |  |  |  |  |

|        |    |    |    |    |     |     |     |     |      |     |     |  |  |  |  |  |  |  |
|--------|----|----|----|----|-----|-----|-----|-----|------|-----|-----|--|--|--|--|--|--|--|
| 195.81 | 23 | 0  | 29 | 0  | 441 | 109 | 170 | 105 | 3264 | 0   | 519 |  |  |  |  |  |  |  |
| 195.91 | 0  | 0  | 17 | 0  | 486 | 131 | 185 | 166 | 3321 | 224 | 524 |  |  |  |  |  |  |  |
| 196.01 | 17 | 7  | 17 | 0  | 450 | 70  | 117 | 385 | 3468 | 348 | 556 |  |  |  |  |  |  |  |
| 196.11 | 5  | 9  | 43 | 0  | 446 | 76  | 209 | 264 | 3571 | 351 | 541 |  |  |  |  |  |  |  |
| 196.21 | 31 | 31 | 29 | 20 | 469 | 91  | 273 | 253 | 3487 | 203 | 518 |  |  |  |  |  |  |  |
| 196.31 | 21 | 0  | 21 | 5  | 480 | 123 | 140 | 129 | 3635 | 285 | 545 |  |  |  |  |  |  |  |
| 196.41 | 0  | 0  | 22 | 0  | 494 | 89  | 283 | 226 | 3902 | 142 | 558 |  |  |  |  |  |  |  |
| 196.51 | 10 | 0  | 28 | 0  | 440 | 115 | 153 | 198 | 3725 | 422 | 559 |  |  |  |  |  |  |  |
| 196.6  | 27 | 15 | 9  | 0  | 505 | 129 | 175 | 223 | 3845 | 337 | 479 |  |  |  |  |  |  |  |
| 196.71 | 11 | 6  | 18 | 19 | 444 | 79  | 157 | 83  | 3764 | 200 | 548 |  |  |  |  |  |  |  |
| 196.81 | 31 | 29 | 40 | 0  | 515 | 88  | 190 | 120 | 3579 | 264 | 524 |  |  |  |  |  |  |  |
| 196.91 | 19 | 27 | 42 | 0  | 510 | 75  | 234 | 238 | 3692 | 400 | 584 |  |  |  |  |  |  |  |
| 197.01 | 0  | 9  | 34 | 0  | 487 | 68  | 156 | 189 | 3796 | 239 | 603 |  |  |  |  |  |  |  |
| 197.1  | 30 | 11 | 42 | 0  | 543 | 56  | 111 | 220 | 4114 | 82  | 622 |  |  |  |  |  |  |  |
| 197.21 | 0  | 20 | 37 | 0  | 536 | 123 | 226 | 250 | 3885 | 117 | 609 |  |  |  |  |  |  |  |
| 197.31 | 5  | 16 | 21 | 0  | 504 | 39  | 354 | 353 | 3484 | 95  | 472 |  |  |  |  |  |  |  |
| 197.41 | 0  | 25 | 48 | 0  | 504 | 11  | 320 | 288 | 3239 | 0   | 527 |  |  |  |  |  |  |  |
| 197.5  | 6  | 18 | 33 | 0  | 385 | 14  | 288 | 334 | 3120 | 0   | 540 |  |  |  |  |  |  |  |
| 197.6  | 27 | 8  | 36 | 0  | 480 | 25  | 285 | 328 | 2990 | 0   | 492 |  |  |  |  |  |  |  |
| 197.71 | 25 | 22 | 44 | 0  | 467 | 108 | 252 | 208 | 3138 | 0   | 505 |  |  |  |  |  |  |  |
| 197.81 | 0  | 18 | 27 | 0  | 461 | 40  | 205 | 188 | 3309 | 195 | 542 |  |  |  |  |  |  |  |
| 197.91 | 21 | 17 | 33 | 0  | 470 | 107 | 292 | 207 | 3395 | 139 | 555 |  |  |  |  |  |  |  |
| 198.01 | 5  | 24 | 43 | 8  | 395 | 52  | 283 | 212 | 3646 | 247 | 568 |  |  |  |  |  |  |  |
| 198.11 | 17 | 0  | 23 | 0  | 465 | 7   | 285 | 295 | 3833 | 158 | 593 |  |  |  |  |  |  |  |
| 198.21 | 23 | 0  | 40 | 0  | 510 | 86  | 253 | 86  | 3907 | 256 | 615 |  |  |  |  |  |  |  |
| 198.3  | 0  | 0  | 19 | 0  | 486 | 111 | 158 | 221 | 4108 | 352 | 614 |  |  |  |  |  |  |  |
| 198.41 | 5  | 25 | 14 | 8  | 589 | 137 | 178 | 132 | 3937 | 218 | 616 |  |  |  |  |  |  |  |
| 198.5  | 0  | 16 | 30 | 0  | 542 | 102 | 218 | 200 | 3965 | 450 | 687 |  |  |  |  |  |  |  |
| 198.61 | 0  | 0  | 19 | 0  | 543 | 32  | 154 | 142 | 4107 | 319 | 663 |  |  |  |  |  |  |  |
| 198.7  | 21 | 6  | 44 | 0  | 584 | 47  | 215 | 261 | 4352 | 357 | 719 |  |  |  |  |  |  |  |
| 198.81 | 0  | 0  | 0  | 0  | 633 | 76  | 214 | 293 | 4475 | 158 | 802 |  |  |  |  |  |  |  |
| 198.9  | 15 | 6  | 28 | 0  | 572 | 120 | 175 | 318 | 4635 | 250 | 817 |  |  |  |  |  |  |  |
| 199.01 | 17 | 0  | 57 | 4  | 629 | 77  | 285 | 221 | 4686 | 371 | 823 |  |  |  |  |  |  |  |
| 199.1  | 32 | 13 | 40 | 0  | 613 | 85  | 263 | 301 | 4884 | 303 | 846 |  |  |  |  |  |  |  |
| 199.21 | 8  | 8  | 49 | 0  | 656 | 66  | 136 | 162 | 5022 | 121 | 822 |  |  |  |  |  |  |  |
| 199.31 | 0  | 21 | 59 | 0  | 621 | 33  | 237 | 292 | 4976 | 187 | 859 |  |  |  |  |  |  |  |
| 199.4  | 26 | 15 | 44 | 17 | 653 | 76  | 281 | 285 | 4946 | 66  | 917 |  |  |  |  |  |  |  |
| 199.51 | 0  | 0  | 34 | 0  | 625 | 130 | 172 | 362 | 5049 | 59  | 880 |  |  |  |  |  |  |  |
| 199.61 | 8  | 5  | 51 | 0  | 635 | 0   | 278 | 377 | 5345 | 71  | 892 |  |  |  |  |  |  |  |
| 199.71 | 10 | 4  | 55 | 0  | 659 | 86  | 327 | 376 | 6444 | 114 | 764 |  |  |  |  |  |  |  |
| 199.81 | 33 | 0  | 78 | 0  | 746 | 0   | 306 | 418 | 7893 | 97  | 792 |  |  |  |  |  |  |  |
| 199.91 | 30 | 15 | 99 | 0  | 902 | 60  | 246 | 568 | 7731 | 166 | 750 |  |  |  |  |  |  |  |
| 200.01 | 8  | 0  | 67 | 0  | 774 | 110 | 241 | 423 | 5502 | 130 | 696 |  |  |  |  |  |  |  |
| 200.11 | 22 | 12 | 40 | 0  | 666 | 69  | 296 | 328 | 4318 | 98  | 598 |  |  |  |  |  |  |  |
| 200.2  | 17 | 25 | 48 | 0  | 605 | 77  | 310 | 359 | 3648 | 0   | 607 |  |  |  |  |  |  |  |
| 200.31 | 5  | 26 | 16 | 0  | 500 | 43  | 256 | 384 | 3296 | 21  | 467 |  |  |  |  |  |  |  |
| 200.4  | 0  | 6  | 7  | 0  | 422 | 62  | 172 | 375 | 3183 | 19  | 504 |  |  |  |  |  |  |  |
| 200.51 | 18 | 0  | 38 | 0  | 427 | 37  | 182 | 205 | 3269 | 116 | 501 |  |  |  |  |  |  |  |
| 200.61 | 7  | 20 | 32 | 0  | 421 | 89  | 191 | 262 | 3422 | 223 | 544 |  |  |  |  |  |  |  |
| 200.7  | 16 | 0  | 30 | 0  | 432 | 9   | 115 | 87  | 3481 | 79  | 496 |  |  |  |  |  |  |  |
| 200.81 | 0  | 0  | 16 | 0  | 408 | 67  | 145 | 184 | 3382 | 349 | 516 |  |  |  |  |  |  |  |
| 200.91 | 8  | 23 | 27 | 0  | 465 | 75  | 63  | 162 | 3691 | 158 | 545 |  |  |  |  |  |  |  |
| 201.01 | 16 | 0  | 19 | 0  | 464 | 91  | 131 | 240 | 4021 | 370 | 524 |  |  |  |  |  |  |  |
| 201.11 | 19 | 0  | 44 | 0  | 533 | 120 | 214 | 115 | 3834 | 351 | 538 |  |  |  |  |  |  |  |
| 201.21 | 6  | 13 | 43 | 0  | 438 | 147 | 174 | 174 | 3499 | 358 | 500 |  |  |  |  |  |  |  |
| 201.3  | 0  | 8  | 49 | 0  | 514 | 139 | 272 | 128 | 3433 | 498 | 491 |  |  |  |  |  |  |  |
| 201.41 | 0  | 9  | 7  | 14 | 417 | 133 | 118 | 120 | 3519 | 162 | 514 |  |  |  |  |  |  |  |
| 201.51 | 7  | 23 | 24 | 0  | 458 | 86  | 202 | 194 | 3632 | 388 | 481 |  |  |  |  |  |  |  |

|        |    |    |    |    |     |     |     |     |      |     |     |  |  |  |  |  |  |  |
|--------|----|----|----|----|-----|-----|-----|-----|------|-----|-----|--|--|--|--|--|--|--|
| 201.61 | 16 | 16 | 16 | 0  | 431 | 85  | 157 | 104 | 3469 | 201 | 515 |  |  |  |  |  |  |  |
| 201.7  | 0  | 8  | 43 | 0  | 461 | 63  | 83  | 151 | 3526 | 471 | 470 |  |  |  |  |  |  |  |
| 201.81 | 0  | 0  | 11 | 0  | 456 | 105 | 187 | 154 | 3526 | 251 | 478 |  |  |  |  |  |  |  |
| 201.9  | 0  | 16 | 30 | 0  | 436 | 118 | 173 | 47  | 3507 | 305 | 526 |  |  |  |  |  |  |  |
| 202.01 | 0  | 0  | 26 | 0  | 401 | 85  | 137 | 150 | 3678 | 460 | 527 |  |  |  |  |  |  |  |
| 202.11 | 15 | 12 | 40 | 0  | 483 | 45  | 33  | 189 | 3700 | 563 | 578 |  |  |  |  |  |  |  |
| 202.21 | 18 | 21 | 44 | 0  | 484 | 94  | 98  | 154 | 3793 | 470 | 611 |  |  |  |  |  |  |  |
| 202.31 | 7  | 16 | 43 | 0  | 521 | 123 | 72  | 154 | 3648 | 468 | 532 |  |  |  |  |  |  |  |
| 202.41 | 14 | 10 | 35 | 0  | 481 | 91  | 120 | 140 | 3878 | 449 | 543 |  |  |  |  |  |  |  |
| 202.51 | 0  | 0  | 9  | 0  | 489 | 110 | 172 | 184 | 3974 | 386 | 549 |  |  |  |  |  |  |  |
| 202.61 | 23 | 9  | 36 | 0  | 492 | 59  | 8   | 41  | 4135 | 292 | 642 |  |  |  |  |  |  |  |
| 202.71 | 11 | 6  | 31 | 0  | 512 | 110 | 121 | 109 | 4175 | 396 | 631 |  |  |  |  |  |  |  |
| 202.81 | 23 | 40 | 42 | 0  | 557 | 87  | 161 | 170 | 4314 | 506 | 642 |  |  |  |  |  |  |  |
| 202.91 | 9  | 10 | 23 | 0  | 533 | 160 | 72  | 142 | 4494 | 325 | 703 |  |  |  |  |  |  |  |
| 203.01 | 8  | 0  | 44 | 0  | 543 | 110 | 162 | 229 | 4513 | 417 | 603 |  |  |  |  |  |  |  |
| 203.11 | 13 | 10 | 19 | 0  | 584 | 69  | 100 | 70  | 4735 | 240 | 783 |  |  |  |  |  |  |  |
| 203.21 | 0  | 4  | 50 | 0  | 618 | 130 | 128 | 244 | 4815 | 292 | 752 |  |  |  |  |  |  |  |
| 203.31 | 4  | 0  | 24 | 0  | 634 | 56  | 93  | 223 | 4926 | 518 | 799 |  |  |  |  |  |  |  |
| 203.4  | 13 | 11 | 15 | 0  | 646 | 52  | 199 | 279 | 4692 | 239 | 723 |  |  |  |  |  |  |  |
| 203.51 | 0  | 6  | 32 | 0  | 583 | 100 | 54  | 189 | 4809 | 231 | 739 |  |  |  |  |  |  |  |
| 203.61 | 0  | 0  | 27 | 0  | 616 | 108 | 167 | 179 | 5030 | 17  | 760 |  |  |  |  |  |  |  |
| 203.7  | 0  | 19 | 43 | 0  | 592 | 0   | 268 | 301 | 4871 | 67  | 735 |  |  |  |  |  |  |  |
| 203.81 | 13 | 17 | 17 | 9  | 635 | 0   | 295 | 350 | 4233 | 109 | 671 |  |  |  |  |  |  |  |
| 203.9  | 8  | 6  | 20 | 0  | 594 | 15  | 247 | 359 | 3765 | 122 | 618 |  |  |  |  |  |  |  |
| 204.01 | 0  | 0  | 12 | 0  | 487 | 27  | 287 | 404 | 3452 | 72  | 532 |  |  |  |  |  |  |  |
| 204.11 | 0  | 12 | 32 | 0  | 493 | 27  | 278 | 351 | 3494 | 64  | 559 |  |  |  |  |  |  |  |
| 204.21 | 0  | 24 | 23 | 0  | 488 | 64  | 140 | 174 | 3472 | 243 | 541 |  |  |  |  |  |  |  |
| 204.31 | 13 | 0  | 18 | 0  | 471 | 74  | 206 | 264 | 3514 | 401 | 534 |  |  |  |  |  |  |  |
| 204.41 | 0  | 8  | 33 | 0  | 466 | 64  | 143 | 264 | 3726 | 160 | 513 |  |  |  |  |  |  |  |
| 204.51 | 0  | 4  | 25 | 16 | 505 | 126 | 102 | 225 | 3781 | 288 | 577 |  |  |  |  |  |  |  |
| 204.61 | 20 | 0  | 22 | 0  | 526 | 96  | 167 | 176 | 3745 | 252 | 563 |  |  |  |  |  |  |  |
| 204.71 | 10 | 9  | 27 | 0  | 515 | 93  | 159 | 74  | 3834 | 155 | 525 |  |  |  |  |  |  |  |
| 204.81 | 31 | 10 | 37 | 0  | 490 | 113 | 101 | 180 | 3937 | 445 | 559 |  |  |  |  |  |  |  |
| 204.9  | 0  | 7  | 38 | 0  | 541 | 43  | 140 | 101 | 4208 | 238 | 549 |  |  |  |  |  |  |  |
| 205.01 | 0  | 30 | 35 | 0  | 533 | 159 | 115 | 174 | 4476 | 181 | 551 |  |  |  |  |  |  |  |
| 205.1  | 16 | 14 | 33 | 0  | 549 | 99  | 165 | 221 | 4215 | 88  | 559 |  |  |  |  |  |  |  |
| 205.21 | 12 | 24 | 32 | 0  | 523 | 72  | 129 | 162 | 4027 | 355 | 566 |  |  |  |  |  |  |  |
| 205.3  | 0  | 0  | 25 | 0  | 499 | 105 | 212 | 242 | 4101 | 270 | 563 |  |  |  |  |  |  |  |
| 205.41 | 19 | 22 | 49 | 0  | 489 | 93  | 158 | 189 | 4154 | 372 | 583 |  |  |  |  |  |  |  |
| 205.51 | 24 | 26 | 38 | 0  | 486 | 93  | 183 | 126 | 3971 | 152 | 575 |  |  |  |  |  |  |  |
| 205.61 | 0  | 0  | 33 | 0  | 563 | 53  | 149 | 149 | 4066 | 466 | 597 |  |  |  |  |  |  |  |
| 205.71 | 0  | 22 | 31 | 0  | 596 | 45  | 136 | 155 | 4010 | 587 | 551 |  |  |  |  |  |  |  |
| 205.81 | 0  | 0  | 13 | 0  | 470 | 79  | 110 | 143 | 3922 | 192 | 569 |  |  |  |  |  |  |  |
| 205.91 | 0  | 14 | 25 | 4  | 534 | 89  | 145 | 35  | 3969 | 336 | 647 |  |  |  |  |  |  |  |
| 206    | 0  | 0  | 0  | 0  | 549 | 49  | 73  | 101 | 4125 | 383 | 629 |  |  |  |  |  |  |  |
| 206.11 | 0  | 5  | 52 | 0  | 513 | 77  | 71  | 269 | 4116 | 228 | 604 |  |  |  |  |  |  |  |
| 206.2  | 0  | 7  | 18 | 0  | 528 | 97  | 148 | 153 | 4192 | 394 | 621 |  |  |  |  |  |  |  |
| 206.31 | 13 | 6  | 56 | 0  | 567 | 113 | 69  | 125 | 4286 | 224 | 620 |  |  |  |  |  |  |  |
| 206.41 | 8  | 24 | 22 | 0  | 594 | 160 | 87  | 88  | 4471 | 305 | 623 |  |  |  |  |  |  |  |
| 206.5  | 32 | 10 | 50 | 9  | 612 | 125 | 103 | 250 | 4356 | 434 | 606 |  |  |  |  |  |  |  |
| 206.61 | 4  | 0  | 19 | 0  | 527 | 105 | 217 | 242 | 4556 | 416 | 667 |  |  |  |  |  |  |  |
| 206.7  | 13 | 16 | 38 | 18 | 602 | 117 | 168 | 193 | 4801 | 360 | 663 |  |  |  |  |  |  |  |
| 206.81 | 0  | 0  | 22 | 0  | 605 | 60  | 204 | 236 | 5069 | 571 | 789 |  |  |  |  |  |  |  |
| 206.91 | 10 | 0  | 27 | 0  | 643 | 60  | 233 | 198 | 5259 | 236 | 753 |  |  |  |  |  |  |  |
| 207.01 | 6  | 5  | 47 | 13 | 647 | 60  | 36  | 263 | 5346 | 70  | 806 |  |  |  |  |  |  |  |
| 207.11 | 19 | 19 | 40 | 0  | 712 | 113 | 253 | 311 | 4692 | 101 | 659 |  |  |  |  |  |  |  |
| 207.21 | 22 | 0  | 11 | 0  | 639 | 23  | 296 | 286 | 4495 | 146 | 680 |  |  |  |  |  |  |  |
| 207.31 | 0  | 19 | 5  | 0  | 593 | 37  | 202 | 354 | 4237 | 144 | 671 |  |  |  |  |  |  |  |

|        |    |    |    |    |     |     |     |     |      |     |     |  |  |  |  |  |  |  |
|--------|----|----|----|----|-----|-----|-----|-----|------|-----|-----|--|--|--|--|--|--|--|
| 207.4  | 15 | 0  | 17 | 0  | 578 | 23  | 175 | 254 | 3884 | 95  | 613 |  |  |  |  |  |  |  |
| 207.51 | 9  | 0  | 24 | 0  | 492 | 100 | 233 | 260 | 3809 | 232 | 636 |  |  |  |  |  |  |  |
| 207.6  | 9  | 0  | 32 | 0  | 516 | 33  | 266 | 136 | 4038 | 152 | 612 |  |  |  |  |  |  |  |
| 207.71 | 0  | 0  | 38 | 0  | 506 | 107 | 188 | 166 | 4166 | 483 | 628 |  |  |  |  |  |  |  |
| 207.81 | 0  | 7  | 35 | 0  | 548 | 78  | 100 | 160 | 4574 | 145 | 601 |  |  |  |  |  |  |  |
| 207.91 | 0  | 28 | 21 | 0  | 563 | 95  | 151 | 249 | 4687 | 231 | 602 |  |  |  |  |  |  |  |
| 208    | 0  | 11 | 34 | 0  | 566 | 65  | 160 | 214 | 4592 | 368 | 649 |  |  |  |  |  |  |  |
| 208.1  | 27 | 12 | 34 | 0  | 547 | 127 | 156 | 93  | 4413 | 337 | 671 |  |  |  |  |  |  |  |
| 208.21 | 13 | 10 | 26 | 0  | 546 | 107 | 142 | 305 | 4353 | 297 | 645 |  |  |  |  |  |  |  |
| 208.31 | 14 | 19 | 24 | 0  | 607 | 65  | 239 | 326 | 4369 | 421 | 686 |  |  |  |  |  |  |  |
| 208.4  | 13 | 15 | 33 | 0  | 511 | 85  | 218 | 264 | 4320 | 380 | 652 |  |  |  |  |  |  |  |
| 208.51 | 0  | 0  | 26 | 10 | 572 | 92  | 142 | 297 | 4243 | 288 | 645 |  |  |  |  |  |  |  |
| 208.61 | 11 | 12 | 23 | 0  | 623 | 93  | 106 | 149 | 4365 | 137 | 706 |  |  |  |  |  |  |  |
| 208.7  | 15 | 0  | 43 | 0  | 583 | 110 | 84  | 211 | 4586 | 256 | 785 |  |  |  |  |  |  |  |
| 208.81 | 19 | 0  | 18 | 0  | 599 | 51  | 125 | 299 | 4653 | 572 | 784 |  |  |  |  |  |  |  |
| 208.91 | 13 | 0  | 15 | 0  | 580 | 80  | 140 | 86  | 4811 | 262 | 805 |  |  |  |  |  |  |  |
| 209.01 | 0  | 0  | 45 | 5  | 591 | 68  | 192 | 95  | 4974 | 246 | 885 |  |  |  |  |  |  |  |
| 209.11 | 8  | 0  | 24 | 0  | 621 | 89  | 121 | 202 | 4904 | 213 | 873 |  |  |  |  |  |  |  |
| 209.21 | 23 | 0  | 16 | 0  | 584 | 105 | 159 | 239 | 4890 | 412 | 832 |  |  |  |  |  |  |  |
| 209.3  | 21 | 17 | 35 | 0  | 603 | 55  | 245 | 139 | 4824 | 364 | 856 |  |  |  |  |  |  |  |
| 209.41 | 24 | 11 | 26 | 0  | 614 | 43  | 159 | 186 | 4819 | 284 | 778 |  |  |  |  |  |  |  |
| 209.5  | 9  | 27 | 42 | 0  | 605 | 86  | 164 | 241 | 4931 | 374 | 830 |  |  |  |  |  |  |  |
| 209.61 | 5  | 0  | 46 | 12 | 532 | 37  | 234 | 238 | 5265 | 218 | 814 |  |  |  |  |  |  |  |
| 209.71 | 12 | 0  | 20 | 0  | 673 | 125 | 200 | 280 | 5425 | 240 | 802 |  |  |  |  |  |  |  |
| 209.81 | 12 | 6  | 36 | 0  | 658 | 66  | 144 | 348 | 5166 | 81  | 807 |  |  |  |  |  |  |  |
| 209.91 | 22 | 0  | 28 | 36 | 667 | 53  | 245 | 271 | 5281 | 325 | 813 |  |  |  |  |  |  |  |
| 210.01 | 27 | 21 | 47 | 0  | 582 | 70  | 191 | 206 | 5166 | 154 | 761 |  |  |  |  |  |  |  |
| 210.11 | 10 | 10 | 19 | 0  | 653 | 93  | 200 | 166 | 5161 | 261 | 746 |  |  |  |  |  |  |  |
| 210.21 | 0  | 16 | 38 | 65 | 592 | 47  | 101 | 140 | 5495 | 211 | 727 |  |  |  |  |  |  |  |
| 210.3  | 0  | 27 | 34 | 0  | 626 | 84  | 152 | 236 | 5456 | 142 | 699 |  |  |  |  |  |  |  |
| 210.41 | 0  | 0  | 49 | 0  | 605 | 87  | 164 | 165 | 5292 | 191 | 647 |  |  |  |  |  |  |  |
| 210.51 | 10 | 11 | 50 | 0  | 606 | 67  | 218 | 344 | 5405 | 232 | 696 |  |  |  |  |  |  |  |
| 210.61 | 4  | 0  | 37 | 0  | 649 | 66  | 187 | 316 | 5458 | 380 | 693 |  |  |  |  |  |  |  |
| 210.71 | 0  | 18 | 42 | 0  | 589 | 45  | 92  | 159 | 5114 | 242 | 704 |  |  |  |  |  |  |  |
| 210.8  | 0  | 9  | 36 | 0  | 614 | 86  | 174 | 101 | 5188 | 329 | 674 |  |  |  |  |  |  |  |
| 210.91 | 6  | 0  | 32 | 0  | 609 | 83  | 140 | 317 | 5300 | 192 | 681 |  |  |  |  |  |  |  |
| 211.01 | 31 | 12 | 33 | 0  | 592 | 86  | 274 | 279 | 5247 | 267 | 685 |  |  |  |  |  |  |  |
| 211.1  | 8  | 17 | 28 | 0  | 583 | 98  | 303 | 217 | 5170 | 290 | 620 |  |  |  |  |  |  |  |
| 211.21 | 6  | 0  | 28 | 0  | 595 | 122 | 219 | 263 | 5317 | 212 | 672 |  |  |  |  |  |  |  |
| 211.3  | 0  | 0  | 24 | 0  | 608 | 51  | 133 | 245 | 5723 | 345 | 633 |  |  |  |  |  |  |  |
| 211.41 | 8  | 0  | 46 | 0  | 616 | 86  | 152 | 267 | 5921 | 74  | 721 |  |  |  |  |  |  |  |
| 211.5  | 0  | 17 | 55 | 0  | 679 | 82  | 105 | 239 | 5834 | 339 | 678 |  |  |  |  |  |  |  |
| 211.61 | 0  | 0  | 26 | 0  | 658 | 74  | 178 | 215 | 5888 | 344 | 661 |  |  |  |  |  |  |  |
| 211.7  | 33 | 26 | 51 | 0  | 574 | 49  | 232 | 247 | 5907 | 371 | 622 |  |  |  |  |  |  |  |
| 211.81 | 6  | 0  | 6  | 0  | 589 | 104 | 160 | 325 | 5825 | 389 | 714 |  |  |  |  |  |  |  |
| 211.9  | 4  | 21 | 52 | 0  | 570 | 112 | 181 | 187 | 6109 | 475 | 729 |  |  |  |  |  |  |  |
| 212.01 | 14 | 0  | 25 | 0  | 566 | 120 | 56  | 294 | 5858 | 447 | 700 |  |  |  |  |  |  |  |
| 212.11 | 11 | 12 | 33 | 0  | 598 | 64  | 168 | 203 | 5716 | 611 | 659 |  |  |  |  |  |  |  |
| 212.21 | 16 | 0  | 50 | 0  | 566 | 122 | 129 | 191 | 5821 | 364 | 645 |  |  |  |  |  |  |  |
| 212.31 | 0  | 0  | 55 | 0  | 544 | 97  | 192 | 163 | 5620 | 345 | 700 |  |  |  |  |  |  |  |
| 212.41 | 32 | 16 | 53 | 0  | 668 | 104 | 87  | 146 | 5554 | 357 | 663 |  |  |  |  |  |  |  |
| 212.5  | 13 | 0  | 25 | 0  | 481 | 35  | 102 | 159 | 5638 | 376 | 705 |  |  |  |  |  |  |  |
| 212.61 | 34 | 10 | 19 | 0  | 577 | 68  | 94  | 140 | 5909 | 441 | 745 |  |  |  |  |  |  |  |
| 212.71 | 7  | 8  | 36 | 0  | 547 | 78  | 104 | 177 | 5781 | 416 | 777 |  |  |  |  |  |  |  |
| 212.81 | 38 | 19 | 42 | 0  | 633 | 95  | 164 | 181 | 5819 | 590 | 673 |  |  |  |  |  |  |  |
| 212.91 | 23 | 0  | 53 | 0  | 530 | 86  | 49  | 155 | 5948 | 482 | 754 |  |  |  |  |  |  |  |
| 213.01 | 13 | 22 | 51 | 0  | 596 | 147 | 128 | 245 | 5897 | 641 | 706 |  |  |  |  |  |  |  |
| 213.11 | 8  | 7  | 44 | 19 | 625 | 101 | 75  | 203 | 5810 | 371 | 689 |  |  |  |  |  |  |  |

|        |                                             |    |    |    |     |     |     |     |      |     |     |  |  |  |  |  |  |  |  |
|--------|---------------------------------------------|----|----|----|-----|-----|-----|-----|------|-----|-----|--|--|--|--|--|--|--|--|
| 213.2  | 11                                          | 10 | 44 | 0  | 559 | 134 | 171 | 231 | 6067 | 402 | 690 |  |  |  |  |  |  |  |  |
| 213.31 | 13                                          | 0  | 59 | 0  | 622 | 90  | 141 | 142 | 6286 | 566 | 760 |  |  |  |  |  |  |  |  |
| 213.4  | 33                                          | 16 | 28 | 15 | 572 | 112 | 132 | 291 | 6207 | 502 | 726 |  |  |  |  |  |  |  |  |
| 213.51 | 7                                           | 19 | 42 | 0  | 612 | 79  | 117 | 232 | 5817 | 361 | 741 |  |  |  |  |  |  |  |  |
| 213.61 | 8                                           | 14 | 46 | 0  | 606 | 116 | 139 | 173 | 6058 | 414 | 741 |  |  |  |  |  |  |  |  |
| 213.71 | 0                                           | 11 | 43 | 0  | 584 | 67  | 90  | 186 | 6236 | 529 | 729 |  |  |  |  |  |  |  |  |
| 213.8  | 12                                          | 6  | 46 | 0  | 643 | 122 | 132 | 183 | 6294 | 328 | 765 |  |  |  |  |  |  |  |  |
| 213.91 | 16                                          | 14 | 30 | 0  | 604 | 54  | 153 | 203 | 6399 | 419 | 762 |  |  |  |  |  |  |  |  |
| 214.01 | 17                                          | 16 | 49 | 0  | 604 | 50  | 188 | 240 | 6422 | 363 | 727 |  |  |  |  |  |  |  |  |
| 214.11 | 12                                          | 17 | 39 | 0  | 635 | 91  | 198 | 155 | 6202 | 291 | 751 |  |  |  |  |  |  |  |  |
| 214.2  | 10                                          | 11 | 24 | 0  | 691 | 104 | 193 | 215 | 6314 | 460 | 743 |  |  |  |  |  |  |  |  |
| 214.31 | 11                                          | 0  | 38 | 0  | 638 | 74  | 161 | 303 | 6849 | 508 | 739 |  |  |  |  |  |  |  |  |
| 214.4  | 11                                          | 0  | 44 | 0  | 654 | 80  | 200 | 275 | 7319 | 235 | 777 |  |  |  |  |  |  |  |  |
| 214.51 | 19                                          | 25 | 52 | 0  | 683 | 63  | 223 | 304 | 7168 | 23  | 749 |  |  |  |  |  |  |  |  |
| 214.61 | 23                                          | 5  | 84 | 0  | 664 | 107 | 301 | 327 | 6321 | 386 | 696 |  |  |  |  |  |  |  |  |
| 214.71 | 7                                           | 28 | 40 | 0  | 634 | 51  | 218 | 321 | 5503 | 281 | 621 |  |  |  |  |  |  |  |  |
| 214.81 | 18                                          | 25 | 51 | 0  | 597 | 99  | 232 | 355 | 5061 | 99  | 638 |  |  |  |  |  |  |  |  |
| 214.91 | 11                                          | 17 | 41 | 0  | 515 | 59  | 118 | 246 | 4926 | 146 | 678 |  |  |  |  |  |  |  |  |
| 215.01 | 6                                           | 12 | 46 | 17 | 529 | 99  | 168 | 181 | 5132 | 42  | 630 |  |  |  |  |  |  |  |  |
| 215.1  | 38                                          | 23 | 29 | 0  | 593 | 90  | 219 | 327 | 5007 | 0   | 633 |  |  |  |  |  |  |  |  |
| 215.21 | 0                                           | 0  | 25 | 0  | 542 | 131 | 201 | 252 | 4952 | 182 | 635 |  |  |  |  |  |  |  |  |
| 215.31 | 9                                           | 0  | 10 | 21 | 548 | 94  | 229 | 313 | 4747 | 164 | 649 |  |  |  |  |  |  |  |  |
| 215.41 | 27                                          | 0  | 50 | 28 | 501 | 51  | 253 | 301 | 4377 | 77  | 553 |  |  |  |  |  |  |  |  |
| 215.5  | 36                                          | 30 | 52 | 0  | 468 | 56  | 291 | 344 | 4454 | 110 | 574 |  |  |  |  |  |  |  |  |
| 215.61 | 0                                           | 0  | 20 | 0  | 554 | 105 | 257 | 384 | 4397 | 189 | 602 |  |  |  |  |  |  |  |  |
| 215.7  | 17                                          | 4  | 42 | 0  | 502 | 78  | 209 | 314 | 4278 | 0   | 555 |  |  |  |  |  |  |  |  |
| 215.81 | 0                                           | 0  | 33 | 0  | 437 | 41  | 276 | 292 | 4388 | 110 | 563 |  |  |  |  |  |  |  |  |
| 215.9  | 16                                          | 0  | 42 | 0  | 469 | 54  | 233 | 375 | 4369 | 178 | 622 |  |  |  |  |  |  |  |  |
| 216.01 | 0                                           | 10 | 37 | 0  | 420 | 144 | 316 | 346 | 4040 | 0   | 631 |  |  |  |  |  |  |  |  |
| 216.11 | 15                                          | 15 | 53 | 0  | 511 | 104 | 288 | 337 | 4248 | 31  | 576 |  |  |  |  |  |  |  |  |
| 216.21 | 24                                          | 8  | 40 | 0  | 483 | 24  | 236 | 332 | 4169 | 276 | 660 |  |  |  |  |  |  |  |  |
| 216.31 | 8                                           | 0  | 49 | 0  | 497 | 71  | 277 | 356 | 4181 | 65  | 711 |  |  |  |  |  |  |  |  |
| 216.41 | 26                                          | 11 | 34 | 0  | 450 | 90  | 244 | 288 | 4101 | 151 | 739 |  |  |  |  |  |  |  |  |
| 216.51 | 16                                          | 11 | 16 | 0  | 493 | 131 | 219 | 289 | 4141 | 134 | 641 |  |  |  |  |  |  |  |  |
| 216.61 | 7                                           | 0  | 34 | 0  | 430 | 39  | 133 | 298 | 4291 | 260 | 712 |  |  |  |  |  |  |  |  |
| 216.71 | 0                                           | 20 | 31 | 0  | 516 | 132 | 242 | 284 | 4160 | 200 | 725 |  |  |  |  |  |  |  |  |
| 216.81 | 10                                          | 8  | 52 | 0  | 592 | 121 | 258 | 287 | 4262 | 307 | 774 |  |  |  |  |  |  |  |  |
| 216.91 | 19                                          | 10 | 38 | 0  | 521 | 47  | 144 | 170 | 4277 | 171 | 679 |  |  |  |  |  |  |  |  |
| 217.01 | 13                                          | 0  | 40 | 0  | 500 | 134 | 180 | 223 | 4178 | 99  | 677 |  |  |  |  |  |  |  |  |
| 217.11 | 6                                           | 0  | 26 | 50 | 525 | 93  | 258 | 121 | 4130 | 357 | 695 |  |  |  |  |  |  |  |  |
| 217.21 | 0                                           | 11 | 39 | 7  | 479 | 102 | 183 | 154 | 3952 | 339 | 606 |  |  |  |  |  |  |  |  |
| 217.3  | 7                                           | 20 | 49 | 0  | 427 | 93  | 283 | 241 | 3868 | 248 | 589 |  |  |  |  |  |  |  |  |
| 217.41 | 0                                           | 20 | 33 | 0  | 423 | 121 | 330 | 194 | 3721 | 134 | 597 |  |  |  |  |  |  |  |  |
| 217.51 | 11                                          | 0  | 23 | 0  | 403 | 55  | 271 | 202 | 3627 | 77  | 557 |  |  |  |  |  |  |  |  |
| 217.61 | 0                                           | 12 | 35 | 0  | 501 | 90  | 188 | 160 | 3688 | 313 | 544 |  |  |  |  |  |  |  |  |
| 217.71 | 16                                          | 8  | 15 | 0  | 375 | 82  | 213 | 232 | 3726 | 341 | 576 |  |  |  |  |  |  |  |  |
| 217.8  | 10                                          | 11 | 25 | 0  | 361 | 76  | 157 | 165 | 3943 | 165 | 583 |  |  |  |  |  |  |  |  |
| 217.91 | 0                                           | 0  | 52 | 0  | 449 | 115 | 210 | 158 | 3930 | 71  | 572 |  |  |  |  |  |  |  |  |
|        |                                             |    |    |    |     |     |     |     |      |     |     |  |  |  |  |  |  |  |  |
|        |                                             |    |    |    |     |     |     |     |      |     |     |  |  |  |  |  |  |  |  |
|        | Scots pine #2. After extraction in alcohol. |    |    |    |     |     |     |     |      |     |     |  |  |  |  |  |  |  |  |
|        |                                             |    |    |    |     |     |     |     |      |     |     |  |  |  |  |  |  |  |  |
|        |                                             |    |    |    |     |     |     |     |      |     |     |  |  |  |  |  |  |  |  |
|        |                                             |    |    |    |     |     |     |     |      |     |     |  |  |  |  |  |  |  |  |
|        |                                             |    |    |    |     |     |     |     |      |     |     |  |  |  |  |  |  |  |  |
|        |                                             |    |    |    |     |     |     |     |      |     |     |  |  |  |  |  |  |  |  |
|        |                                             |    |    |    |     |     |     |     |      |     |     |  |  |  |  |  |  |  |  |
|        |                                             |    |    |    |     |     |     |     |      |     |     |  |  |  |  |  |  |  |  |
|        |                                             |    |    |    |     |     |     |     |      |     |     |  |  |  |  |  |  |  |  |
|        |                                             |    |    |    |     |     |     |     |      |     |     |  |  |  |  |  |  |  |  |
|        |                                             |    |    |    |     |     |     |     |      |     |     |  |  |  |  |  |  |  |  |
|        |                                             |    |    |    |     |     |     |     |      |     |     |  |  |  |  |  |  |  |  |
|        |                                             |    |    |    |     |     |     |     |      |     |     |  |  |  |  |  |  |  |  |
|        |                                             |    |    |    |     |     |     |     |      |     |     |  |  |  |  |  |  |  |  |
|        |                                             |    |    |    |     |     |     |     |      |     |     |  |  |  |  |  |  |  |  |
|        |                                             |    |    |    |     |     |     |     |      |     |     |  |  |  |  |  |  |  |  |
|        |                                             |    |    |    |     |     |     |     |      |     |     |  |  |  |  |  |  |  |  |
|        |                                             |    |    |    |     |     |     |     |      |     |     |  |  |  |  |  |  |  |  |
|        |                                             |    |    |    |     |     |     |     |      |     |     |  |  |  |  |  |  |  |  |
|        |                                             |    |    |    |     |     |     |     |      |     |     |  |  |  |  |  |  |  |  |
|        |                                             |    |    |    |     |     |     |     |      |     |     |  |  |  |  |  |  |  |  |
|        |                                             |    |    |    |     |     |     |     |      |     |     |  |  |  |  |  |  |  |  |
|        |                                             |    |    |    |     |     |     |     |      |     |     |  |  |  |  |  |  |  |  |
|        |                                             |    |    |    |     |     |     |     |      |     |     |  |  |  |  |  |  |  |  |
|        |                                             |    |    |    |     |     |     |     |      |     |     |  |  |  |  |  |  |  |  |
|        |                                             |    |    |    |     |     |     |     |      |     |     |  |  |  |  |  |  |  |  |
|        |                                             |    |    |    |     |     |     |     |      |     |     |  |  |  |  |  |  |  |  |
|        |                                             |    |    |    |     |     |     |     |      |     |     |  |  |  |  |  |  |  |  |
|        |                                             |    |    |    |     |     |     |     |      |     |     |  |  |  |  |  |  |  |  |
|        |                                             |    |    |    |     |     |     |     |      |     |     |  |  |  |  |  |  |  |  |
|        |                                             |    |    |    |     |     |     |     |      |     |     |  |  |  |  |  |  |  |  |
|        |                                             |    |    |    |     |     |     |     |      |     |     |  |  |  |  |  |  |  |  |
|        |                                             |    |    |    |     |     |     |     |      |     |     |  |  |  |  |  |  |  |  |
|        |                                             |    |    |    |     |     |     |     |      |     |     |  |  |  |  |  |  |  |  |
|        |                                             |    |    |    |     |     |     |     |      |     |     |  |  |  |  |  |  |  |  |
|        |                                             |    |    |    |     |     |     |     |      |     |     |  |  |  |  |  |  |  |  |
|        |                                             |    |    |    |     |     |     |     |      |     |     |  |  |  |  |  |  |  |  |
|        |                                             |    |    |    |     |     |     |     |      |     |     |  |  |  |  |  |  |  |  |
|        |                                             |    |    |    |     |     |     |     |      |     |     |  |  |  |  |  |  |  |  |
|        |                                             | </ |    |    |     |     |     |     |      |     |     |  |  |  |  |  |  |  |  |

| position (mm) | Al | P  | S  | Ti | Mn  | Fe  | Cu  | Zn  | Ca   | Sr  | K   |
|---------------|----|----|----|----|-----|-----|-----|-----|------|-----|-----|
| 20.01         | 57 | 0  | 15 | 0  | 632 | 275 | 236 | 638 | 4109 | 163 | 782 |
| 20.11         | 77 | 10 | 25 | 10 | 456 | 413 | 246 | 630 | 2510 | 28  | 613 |
| 20.21         | 55 | 19 | 0  | 0  | 270 | 94  | 101 | 344 | 913  | 0   | 328 |
| 20.31         | 60 | 27 | 15 | 0  | 137 | 26  | 11  | 274 | 294  | 327 | 175 |
| 20.41         | 50 | 0  | 0  | 0  | 90  | 120 | 170 | 144 | 243  | 306 | 118 |
| 20.50         | 49 | 0  | 0  | 31 | 149 | 60  | 135 | 106 | 243  | 145 | 106 |
| 20.60         | 41 | 21 | 0  | 6  | 154 | 98  | 157 | 150 | 260  | 97  | 87  |
| 20.71         | 39 | 33 | 0  | 0  | 118 | 62  | 98  | 186 | 260  | 226 | 119 |
| 20.81         | 51 | 32 | 8  | 8  | 108 | 24  | 244 | 183 | 177  | 0   | 109 |
| 20.91         | 57 | 0  | 0  | 0  | 138 | 0   | 214 | 349 | 179  | 0   | 97  |
| 21.01         | 72 | 30 | 14 | 20 | 88  | 8   | 149 | 230 | 156  | 60  | 61  |
| 21.11         | 57 | 9  | 0  | 11 | 146 | 79  | 173 | 237 | 168  | 98  | 76  |
| 21.21         | 31 | 0  | 8  | 0  | 120 | 113 | 114 | 111 | 240  | 135 | 86  |
| 21.31         | 57 | 12 | 0  | 51 | 154 | 90  | 158 | 264 | 254  | 369 | 32  |
| 21.41         | 54 | 5  | 0  | 11 | 209 | 108 | 35  | 171 | 254  | 314 | 61  |
| 21.51         | 52 | 11 | 18 | 17 | 183 | 147 | 45  | 94  | 323  | 155 | 98  |
| 21.61         | 47 | 0  | 0  | 32 | 138 | 169 | 64  | 122 | 270  | 367 | 114 |
| 21.71         | 81 | 0  | 0  | 51 | 152 | 95  | 101 | 149 | 291  | 237 | 83  |
| 21.81         | 74 | 0  | 11 | 0  | 131 | 115 | 59  | 207 | 281  | 144 | 80  |
| 21.91         | 55 | 0  | 0  | 11 | 187 | 83  | 222 | 254 | 253  | 130 | 77  |
| 22.01         | 37 | 0  | 0  | 33 | 108 | 37  | 93  | 228 | 229  | 52  | 76  |
| 22.10         | 60 | 12 | 0  | 18 | 189 | 72  | 176 | 297 | 216  | 0   | 83  |
| 22.20         | 41 | 0  | 0  | 23 | 163 | 105 | 69  | 183 | 239  | 223 | 83  |
| 22.31         | 35 | 0  | 0  | 36 | 156 | 59  | 21  | 151 | 253  | 206 | 99  |
| 22.41         | 62 | 13 | 0  | 14 | 171 | 101 | 88  | 88  | 282  | 311 | 70  |
| 22.51         | 72 | 0  | 0  | 27 | 151 | 159 | 159 | 240 | 274  | 112 | 108 |
| 22.61         | 51 | 8  | 0  | 34 | 194 | 116 | 164 | 153 | 329  | 294 | 68  |
| 22.71         | 17 | 7  | 0  | 19 | 196 | 166 | 92  | 194 | 266  | 235 | 65  |
| 22.81         | 78 | 10 | 17 | 25 | 141 | 49  | 156 | 222 | 302  | 286 | 88  |
| 22.91         | 44 | 12 | 9  | 0  | 242 | 38  | 212 | 372 | 305  | 147 | 93  |
| 23.01         | 61 | 21 | 11 | 0  | 116 | 48  | 178 | 322 | 227  | 0   | 78  |
| 23.11         | 47 | 7  | 0  | 11 | 184 | 55  | 224 | 408 | 192  | 0   | 60  |
| 23.21         | 56 | 0  | 7  | 0  | 180 | 66  | 213 | 168 | 181  | 6   | 71  |
| 23.31         | 52 | 0  | 0  | 10 | 169 | 33  | 78  | 222 | 270  | 262 | 62  |
| 23.41         | 57 | 0  | 0  | 7  | 204 | 165 | 186 | 153 | 268  | 249 | 42  |
| 23.50         | 59 | 0  | 6  | 24 | 183 | 105 | 174 | 108 | 322  | 312 | 91  |
| 23.61         | 78 | 17 | 6  | 34 | 174 | 134 | 143 | 96  | 325  | 384 | 69  |
| 23.71         | 57 | 11 | 0  | 30 | 177 | 143 | 225 | 146 | 305  | 178 | 68  |
| 23.81         | 37 | 18 | 0  | 41 | 172 | 111 | 129 | 205 | 325  | 184 | 49  |
| 23.91         | 57 | 0  | 0  | 9  | 158 | 66  | 200 | 155 | 327  | 424 | 61  |
| 24.01         | 36 | 0  | 0  | 0  | 219 | 79  | 167 | 318 | 316  | 188 | 74  |
| 24.11         | 65 | 20 | 5  | 0  | 158 | 54  | 213 | 349 | 299  | 0   | 87  |

|       |    |    |    |    |     |     |     |     |     |     |     |  |  |  |  |  |  |  |
|-------|----|----|----|----|-----|-----|-----|-----|-----|-----|-----|--|--|--|--|--|--|--|
| 25.10 | 45 | 20 | 0  | 11 | 171 | 85  | 280 | 181 | 351 | 167 | 85  |  |  |  |  |  |  |  |
| 25.20 | 53 | 6  | 13 | 46 | 158 | 47  | 170 | 400 | 309 | 0   | 98  |  |  |  |  |  |  |  |
| 25.30 | 44 | 0  | 0  | 0  | 201 | 26  | 382 | 348 | 195 | 0   | 51  |  |  |  |  |  |  |  |
| 25.40 | 51 | 17 | 0  | 0  | 160 | 58  | 222 | 295 | 200 | 89  | 54  |  |  |  |  |  |  |  |
| 25.51 | 60 | 0  | 0  | 0  | 186 | 15  | 188 | 175 | 248 | 143 | 80  |  |  |  |  |  |  |  |
| 25.60 | 43 | 0  | 0  | 9  | 175 | 146 | 195 | 232 | 280 | 86  | 37  |  |  |  |  |  |  |  |
| 25.71 | 41 | 0  | 0  | 32 | 160 | 134 | 195 | 152 | 284 | 282 | 71  |  |  |  |  |  |  |  |
| 25.81 | 31 | 0  | 0  | 12 | 145 | 125 | 131 | 105 | 288 | 107 | 54  |  |  |  |  |  |  |  |
| 25.91 | 50 | 22 | 22 | 44 | 166 | 120 | 217 | 262 | 280 | 0   | 85  |  |  |  |  |  |  |  |
| 26.00 | 54 | 10 | 10 | 0  | 206 | 13  | 188 | 251 | 233 | 0   | 56  |  |  |  |  |  |  |  |
| 26.10 | 40 | 0  | 0  | 0  | 134 | 0   | 125 | 251 | 198 | 0   | 92  |  |  |  |  |  |  |  |
| 26.21 | 39 | 20 | 6  | 0  | 186 | 27  | 132 | 320 | 134 | 0   | 43  |  |  |  |  |  |  |  |
| 26.30 | 55 | 5  | 14 | 0  | 206 | 36  | 172 | 307 | 227 | 192 | 62  |  |  |  |  |  |  |  |
| 26.41 | 52 | 15 | 6  | 37 | 145 | 17  | 169 | 204 | 219 | 112 | 42  |  |  |  |  |  |  |  |
| 26.51 | 58 | 0  | 0  | 38 | 191 | 78  | 235 | 227 | 274 | 300 | 78  |  |  |  |  |  |  |  |
| 26.61 | 63 | 0  | 0  | 12 | 145 | 98  | 127 | 231 | 340 | 253 | 59  |  |  |  |  |  |  |  |
| 26.71 | 59 | 5  | 0  | 29 | 175 | 79  | 102 | 155 | 249 | 316 | 57  |  |  |  |  |  |  |  |
| 26.81 | 38 | 0  | 0  | 25 | 190 | 95  | 198 | 295 | 318 | 182 | 55  |  |  |  |  |  |  |  |
| 26.91 | 87 | 5  | 0  | 0  | 190 | 91  | 165 | 146 | 346 | 312 | 46  |  |  |  |  |  |  |  |
| 27.00 | 44 | 26 | 12 | 0  | 209 | 104 | 176 | 379 | 313 | 244 | 88  |  |  |  |  |  |  |  |
| 27.11 | 52 | 0  | 11 | 0  | 228 | 104 | 234 | 364 | 292 | 46  | 56  |  |  |  |  |  |  |  |
| 27.21 | 64 | 48 | 5  | 0  | 217 | 14  | 188 | 199 | 230 | 0   | 83  |  |  |  |  |  |  |  |
| 27.30 | 52 | 0  | 0  | 0  | 111 | 58  | 133 | 310 | 236 | 0   | 60  |  |  |  |  |  |  |  |
| 27.40 | 49 | 0  | 0  | 0  | 163 | 50  | 227 | 90  | 216 | 43  | 83  |  |  |  |  |  |  |  |
| 27.51 | 40 | 0  | 0  | 0  | 211 | 44  | 99  | 120 | 272 | 362 | 51  |  |  |  |  |  |  |  |
| 27.61 | 43 | 0  | 0  | 0  | 174 | 109 | 108 | 190 | 308 | 293 | 47  |  |  |  |  |  |  |  |
| 27.70 | 54 | 7  | 0  | 7  | 164 | 183 | 182 | 215 | 317 | 392 | 55  |  |  |  |  |  |  |  |
| 27.80 | 69 | 0  | 0  | 36 | 202 | 122 | 264 | 122 | 337 | 388 | 60  |  |  |  |  |  |  |  |
| 27.90 | 61 | 0  | 0  | 0  | 138 | 120 | 166 | 283 | 291 | 183 | 71  |  |  |  |  |  |  |  |
| 28.00 | 54 | 23 | 34 | 39 | 154 | 64  | 236 | 322 | 286 | 0   | 79  |  |  |  |  |  |  |  |
| 28.11 | 43 | 0  | 0  | 0  | 216 | 35  | 195 | 220 | 256 | 224 | 73  |  |  |  |  |  |  |  |
| 28.21 | 67 | 11 | 0  | 11 | 142 | 87  | 163 | 256 | 283 | 188 | 46  |  |  |  |  |  |  |  |
| 28.31 | 54 | 0  | 0  | 26 | 195 | 78  | 203 | 134 | 273 | 311 | 31  |  |  |  |  |  |  |  |
| 28.41 | 30 | 21 | 0  | 33 | 182 | 103 | 204 | 108 | 280 | 149 | 84  |  |  |  |  |  |  |  |
| 28.51 | 59 | 0  | 0  | 0  | 217 | 90  | 103 | 208 | 312 | 44  | 47  |  |  |  |  |  |  |  |
| 28.61 | 53 | 0  | 0  | 41 | 170 | 124 | 137 | 54  | 277 | 281 | 112 |  |  |  |  |  |  |  |
| 28.71 | 26 | 0  | 0  | 24 | 228 | 210 | 251 | 251 | 275 | 136 | 89  |  |  |  |  |  |  |  |
| 28.80 | 67 | 21 | 0  | 5  | 167 | 69  | 219 | 239 | 346 | 82  | 59  |  |  |  |  |  |  |  |
| 28.90 | 58 | 10 | 0  | 0  | 177 | 80  | 253 | 406 | 286 | 67  | 89  |  |  |  |  |  |  |  |
| 29.00 | 55 | 0  | 21 | 0  | 156 | 22  | 386 | 157 | 236 | 74  | 81  |  |  |  |  |  |  |  |
| 29.10 | 54 | 18 | 0  | 0  | 172 | 66  | 186 | 270 | 212 | 68  | 76  |  |  |  |  |  |  |  |
| 29.21 | 66 | 36 | 0  | 13 | 153 | 31  | 227 | 289 | 267 | 0   | 51  |  |  |  |  |  |  |  |
| 29.30 | 32 | 16 | 0  | 0  | 205 | 63  | 163 | 240 | 242 | 89  | 89  |  |  |  |  |  |  |  |
| 29.41 | 58 | 0  | 0  | 22 | 191 | 92  | 113 | 202 | 263 | 107 | 78  |  |  |  |  |  |  |  |
| 29.51 | 50 | 0  | 0  | 17 | 173 | 126 | 170 | 134 | 293 | 113 | 66  |  |  |  |  |  |  |  |
| 29.61 | 27 | 0  | 0  | 32 | 156 | 171 | 107 | 59  | 285 | 315 | 45  |  |  |  |  |  |  |  |
| 29.70 | 42 | 7  | 7  | 0  | 208 | 219 | 197 | 245 | 324 | 328 | 64  |  |  |  |  |  |  |  |
| 29.81 | 42 | 0  | 0  | 0  | 195 | 144 | 108 | 118 | 303 | 275 | 53  |  |  |  |  |  |  |  |
| 29.90 | 47 | 4  | 0  | 0  | 209 | 109 | 179 | 41  | 354 | 265 | 88  |  |  |  |  |  |  |  |
| 30.01 | 14 | 9  | 9  | 0  | 222 | 180 | 130 | 304 | 373 | 219 | 65  |  |  |  |  |  |  |  |
| 30.11 | 47 | 8  | 0  | 0  | 194 | 168 | 345 | 208 | 446 | 299 | 55  |  |  |  |  |  |  |  |
| 30.20 | 64 | 0  | 0  | 40 | 189 | 61  | 228 | 199 | 340 | 134 | 70  |  |  |  |  |  |  |  |
| 30.30 | 70 | 26 | 19 | 20 | 178 | 58  | 292 | 306 | 356 | 159 | 94  |  |  |  |  |  |  |  |
| 30.41 | 51 | 9  | 6  | 12 | 210 | 0   | 127 | 374 | 270 | 0   | 86  |  |  |  |  |  |  |  |
| 30.51 | 37 | 20 | 0  | 42 | 230 | 69  | 251 | 373 | 266 | 126 | 70  |  |  |  |  |  |  |  |
| 30.61 | 50 | 0  | 0  | 14 | 166 | 8   | 186 | 430 | 241 | 0   | 77  |  |  |  |  |  |  |  |
| 30.71 | 48 | 10 | 0  | 47 | 203 | 75  | 224 | 133 | 244 | 148 | 37  |  |  |  |  |  |  |  |
| 30.81 | 44 | 29 | 18 | 0  | 138 | 95  | 162 | 215 | 356 | 33  | 90  |  |  |  |  |  |  |  |

|       |    |    |    |    |     |     |     |     |     |     |    |  |  |  |  |  |  |  |
|-------|----|----|----|----|-----|-----|-----|-----|-----|-----|----|--|--|--|--|--|--|--|
| 30.91 | 71 | 0  | 0  | 18 | 208 | 64  | 172 | 114 | 282 | 7   | 62 |  |  |  |  |  |  |  |
| 31.01 | 56 | 0  | 0  | 23 | 139 | 94  | 197 | 190 | 335 | 277 | 46 |  |  |  |  |  |  |  |
| 31.11 | 41 | 8  | 0  | 14 | 188 | 98  | 82  | 149 | 384 | 127 | 82 |  |  |  |  |  |  |  |
| 31.21 | 57 | 20 | 0  | 11 | 167 | 165 | 155 | 236 | 346 | 217 | 83 |  |  |  |  |  |  |  |
| 31.31 | 74 | 0  | 0  | 12 | 72  | 114 | 171 | 216 | 361 | 56  | 82 |  |  |  |  |  |  |  |
| 31.41 | 34 | 0  | 11 | 29 | 160 | 104 | 176 | 375 | 325 | 0   | 58 |  |  |  |  |  |  |  |
| 31.50 | 66 | 7  | 26 | 13 | 162 | 63  | 243 | 226 | 265 | 0   | 47 |  |  |  |  |  |  |  |
| 31.61 | 62 | 9  | 0  | 60 | 155 | 35  | 285 | 364 | 222 | 0   | 68 |  |  |  |  |  |  |  |
| 31.70 | 34 | 0  | 0  | 4  | 137 | 62  | 25  | 342 | 202 | 22  | 67 |  |  |  |  |  |  |  |
| 31.80 | 57 | 0  | 0  | 0  | 165 | 70  | 202 | 120 | 308 | 185 | 75 |  |  |  |  |  |  |  |
| 31.90 | 43 | 0  | 0  | 15 | 160 | 73  | 110 | 129 | 346 | 340 | 79 |  |  |  |  |  |  |  |
| 32.01 | 54 | 10 | 0  | 30 | 174 | 98  | 106 | 237 | 315 | 333 | 64 |  |  |  |  |  |  |  |
| 32.10 | 51 | 0  | 0  | 54 | 149 | 176 | 137 | 210 | 339 | 196 | 69 |  |  |  |  |  |  |  |
| 32.20 | 48 | 46 | 0  | 25 | 187 | 58  | 156 | 212 | 318 | 0   | 68 |  |  |  |  |  |  |  |
| 32.31 | 78 | 25 | 19 | 18 | 157 | 0   | 249 | 379 | 305 | 157 | 83 |  |  |  |  |  |  |  |
| 32.40 | 53 | 0  | 0  | 0  | 115 | 44  | 177 | 220 | 257 | 55  | 83 |  |  |  |  |  |  |  |
| 32.50 | 34 | 16 | 0  | 0  | 227 | 74  | 153 | 303 | 246 | 246 | 68 |  |  |  |  |  |  |  |
| 32.61 | 46 | 10 | 0  | 0  | 155 | 125 | 217 | 234 | 220 | 188 | 60 |  |  |  |  |  |  |  |
| 32.71 | 35 | 14 | 0  | 30 | 161 | 138 | 165 | 60  | 246 | 323 | 53 |  |  |  |  |  |  |  |
| 32.81 | 20 | 8  | 0  | 0  | 146 | 130 | 164 | 203 | 286 | 150 | 48 |  |  |  |  |  |  |  |
| 32.91 | 23 | 0  | 0  | 33 | 191 | 157 | 212 | 114 | 356 | 328 | 45 |  |  |  |  |  |  |  |
| 33.01 | 69 | 0  | 0  | 0  | 146 | 195 | 96  | 89  | 296 | 190 | 59 |  |  |  |  |  |  |  |
| 33.11 | 75 | 0  | 0  | 0  | 158 | 231 | 174 | 230 | 388 | 287 | 37 |  |  |  |  |  |  |  |
| 33.21 | 65 | 16 | 0  | 10 | 200 | 145 | 78  | 237 | 369 | 181 | 61 |  |  |  |  |  |  |  |
| 33.31 | 40 | 0  | 0  | 42 | 189 | 70  | 200 | 116 | 344 | 280 | 34 |  |  |  |  |  |  |  |
| 33.41 | 47 | 0  | 0  | 0  | 245 | 124 | 231 | 29  | 354 | 301 | 76 |  |  |  |  |  |  |  |
| 33.51 | 60 | 9  | 7  | 18 | 146 | 152 | 141 | 153 | 327 | 291 | 60 |  |  |  |  |  |  |  |
| 33.61 | 57 | 0  | 0  | 0  | 198 | 130 | 246 | 399 | 296 | 26  | 69 |  |  |  |  |  |  |  |
| 33.70 | 57 | 37 | 13 | 15 | 163 | 78  | 303 | 399 | 324 | 113 | 86 |  |  |  |  |  |  |  |
| 33.81 | 39 | 0  | 0  | 22 | 159 | 55  | 233 | 276 | 217 | 39  | 39 |  |  |  |  |  |  |  |
| 33.91 | 41 | 20 | 0  | 12 | 162 | 95  | 185 | 107 | 295 | 0   | 44 |  |  |  |  |  |  |  |
| 34.01 | 58 | 0  | 0  | 0  | 192 | 138 | 173 | 224 | 326 | 185 | 78 |  |  |  |  |  |  |  |
| 34.11 | 28 | 4  | 0  | 17 | 197 | 182 | 126 | 93  | 310 | 281 | 84 |  |  |  |  |  |  |  |
| 34.21 | 28 | 0  | 0  | 35 | 177 | 246 | 120 | 217 | 337 | 142 | 73 |  |  |  |  |  |  |  |
| 34.31 | 67 | 0  | 0  | 0  | 175 | 157 | 233 | 274 | 350 | 363 | 71 |  |  |  |  |  |  |  |
| 34.41 | 51 | 8  | 24 | 23 | 254 | 163 | 172 | 323 | 323 | 0   | 50 |  |  |  |  |  |  |  |
| 34.51 | 52 | 0  | 0  | 10 | 198 | 73  | 257 | 336 | 302 | 160 | 45 |  |  |  |  |  |  |  |
| 34.61 | 65 | 25 | 12 | 0  | 166 | 70  | 147 | 205 | 340 | 191 | 54 |  |  |  |  |  |  |  |
| 34.71 | 50 | 11 | 0  | 26 | 147 | 132 | 189 | 256 | 302 | 259 | 49 |  |  |  |  |  |  |  |
| 34.81 | 44 | 0  | 0  | 0  | 182 | 38  | 154 | 178 | 317 | 135 | 69 |  |  |  |  |  |  |  |
| 34.90 | 26 | 0  | 0  | 0  | 199 | 135 | 152 | 263 | 361 | 341 | 51 |  |  |  |  |  |  |  |
| 35.00 | 37 | 0  | 0  | 13 | 206 | 162 | 133 | 201 | 325 | 255 | 42 |  |  |  |  |  |  |  |
| 35.11 | 59 | 28 | 21 | 0  | 208 | 135 | 125 | 94  | 339 | 252 | 64 |  |  |  |  |  |  |  |
| 35.21 | 41 | 9  | 22 | 17 | 186 | 123 | 168 | 302 | 338 | 79  | 61 |  |  |  |  |  |  |  |
| 35.31 | 58 | 0  | 0  | 0  | 153 | 78  | 225 | 333 | 238 | 0   | 62 |  |  |  |  |  |  |  |
| 35.40 | 45 | 15 | 0  | 23 | 206 | 59  | 189 | 256 | 217 | 0   | 54 |  |  |  |  |  |  |  |
| 35.51 | 49 | 5  | 0  | 37 | 167 | 87  | 227 | 191 | 212 | 196 | 35 |  |  |  |  |  |  |  |
| 35.61 | 50 | 23 | 12 | 38 | 191 | 48  | 148 | 217 | 226 | 188 | 72 |  |  |  |  |  |  |  |
| 35.70 | 21 | 0  | 0  | 0  | 121 | 59  | 87  | 182 | 248 | 182 | 67 |  |  |  |  |  |  |  |
| 35.80 | 20 | 0  | 0  | 25 | 196 | 149 | 177 | 141 | 309 | 282 | 67 |  |  |  |  |  |  |  |
| 35.91 | 54 | 0  | 0  | 21 | 206 | 70  | 133 | 152 | 303 | 360 | 69 |  |  |  |  |  |  |  |
| 36.01 | 22 | 0  | 0  | 0  | 201 | 86  | 5   | 170 | 345 | 403 | 40 |  |  |  |  |  |  |  |
| 36.10 | 38 | 0  | 0  | 0  | 220 | 101 | 174 | 113 | 290 | 259 | 55 |  |  |  |  |  |  |  |
| 36.20 | 56 | 23 | 24 | 33 | 219 | 82  | 211 | 195 | 326 | 216 | 53 |  |  |  |  |  |  |  |
| 36.30 | 64 | 12 | 5  | 18 | 204 | 37  | 222 | 212 | 322 | 0   | 75 |  |  |  |  |  |  |  |
| 36.41 | 38 | 0  | 0  | 0  | 211 | 123 | 249 | 298 | 258 | 51  | 47 |  |  |  |  |  |  |  |
| 36.50 | 57 | 27 | 0  | 0  | 146 | 60  | 122 | 180 | 253 | 45  | 69 |  |  |  |  |  |  |  |
| 36.61 | 61 | 0  | 17 | 14 | 165 | 97  | 132 | 280 | 290 | 183 | 51 |  |  |  |  |  |  |  |

|       |    |    |    |    |     |     |     |     |     |     |     |  |  |  |  |  |  |  |
|-------|----|----|----|----|-----|-----|-----|-----|-----|-----|-----|--|--|--|--|--|--|--|
| 36.71 | 48 | 17 | 0  | 66 | 196 | 116 | 174 | 261 | 348 | 381 | 76  |  |  |  |  |  |  |  |
| 36.81 | 57 | 26 | 0  | 0  | 174 | 35  | 138 | 187 | 345 | 87  | 66  |  |  |  |  |  |  |  |
| 36.91 | 57 | 14 | 13 | 22 | 216 | 79  | 223 | 172 | 368 | 120 | 75  |  |  |  |  |  |  |  |
| 37.01 | 53 | 13 | 0  | 46 | 155 | 39  | 134 | 179 | 370 | 119 | 60  |  |  |  |  |  |  |  |
| 37.11 | 28 | 0  | 0  | 10 | 177 | 153 | 158 | 134 | 308 | 287 | 43  |  |  |  |  |  |  |  |
| 37.21 | 32 | 0  | 0  | 6  | 176 | 115 | 75  | 159 | 374 | 168 | 81  |  |  |  |  |  |  |  |
| 37.30 | 36 | 0  | 0  | 7  | 216 | 139 | 155 | 222 | 339 | 407 | 73  |  |  |  |  |  |  |  |
| 37.41 | 47 | 0  | 0  | 0  | 211 | 149 | 236 | 207 | 282 | 236 | 67  |  |  |  |  |  |  |  |
| 37.51 | 69 | 0  | 0  | 21 | 244 | 138 | 199 | 139 | 332 | 252 | 43  |  |  |  |  |  |  |  |
| 37.60 | 42 | 0  | 0  | 26 | 319 | 149 | 252 | 147 | 402 | 50  | 91  |  |  |  |  |  |  |  |
| 37.71 | 46 | 0  | 0  | 25 | 269 | 116 | 243 | 312 | 409 | 153 | 64  |  |  |  |  |  |  |  |
| 37.80 | 36 | 14 | 0  | 0  | 216 | 71  | 172 | 290 | 429 | 24  | 99  |  |  |  |  |  |  |  |
| 37.90 | 42 | 11 | 0  | 0  | 195 | 55  | 171 | 260 | 376 | 211 | 59  |  |  |  |  |  |  |  |
| 38.01 | 51 | 0  | 0  | 11 | 250 | 143 | 138 | 360 | 358 | 157 | 67  |  |  |  |  |  |  |  |
| 38.11 | 46 | 0  | 0  | 35 | 195 | 25  | 189 | 333 | 362 | 242 | 102 |  |  |  |  |  |  |  |
| 38.21 | 36 | 0  | 0  | 0  | 248 | 83  | 212 | 274 | 360 | 33  | 84  |  |  |  |  |  |  |  |
| 38.31 | 36 | 0  | 0  | 0  | 208 | 143 | 174 | 358 | 352 | 100 | 47  |  |  |  |  |  |  |  |
| 38.40 | 51 | 0  | 0  | 53 | 243 | 217 | 155 | 143 | 403 | 344 | 61  |  |  |  |  |  |  |  |
| 38.50 | 33 | 0  | 0  | 38 | 209 | 311 | 168 | 297 | 412 | 175 | 78  |  |  |  |  |  |  |  |
| 38.60 | 53 | 0  | 0  | 26 | 218 | 497 | 185 | 53  | 431 | 273 | 58  |  |  |  |  |  |  |  |
| 38.71 | 19 | 0  | 0  | 17 | 90  | 469 | 48  | 156 | 338 | 405 | 30  |  |  |  |  |  |  |  |
| 38.80 | 5  | 0  | 0  | 0  | 124 | 258 | 0   | 18  | 153 | 549 | 0   |  |  |  |  |  |  |  |
| 38.91 | 26 | 0  | 0  | 31 | 116 | 176 | 12  | 79  | 69  | 649 | 0   |  |  |  |  |  |  |  |
| 39.01 | 33 | 0  | 0  | 0  | 202 | 217 | 136 | 229 | 307 | 227 | 56  |  |  |  |  |  |  |  |
| 39.11 | 22 | 0  | 9  | 0  | 257 | 113 | 255 | 355 | 519 | 0   | 115 |  |  |  |  |  |  |  |
| 39.20 | 37 | 21 | 11 | 19 | 191 | 47  | 244 | 469 | 390 | 0   | 94  |  |  |  |  |  |  |  |
| 39.31 | 60 | 0  | 0  | 0  | 183 | 81  | 194 | 332 | 297 | 0   | 60  |  |  |  |  |  |  |  |
| 39.41 | 56 | 0  | 9  | 24 | 198 | 77  | 246 | 194 | 246 | 27  | 83  |  |  |  |  |  |  |  |
| 39.51 | 52 | 7  | 0  | 23 | 175 | 57  | 204 | 224 | 256 | 168 | 49  |  |  |  |  |  |  |  |
| 39.61 | 53 | 9  | 0  | 0  | 182 | 111 | 117 | 206 | 297 | 243 | 70  |  |  |  |  |  |  |  |
| 39.71 | 42 | 0  | 0  | 0  | 205 | 141 | 180 | 198 | 341 | 36  | 66  |  |  |  |  |  |  |  |
| 39.80 | 43 | 0  | 0  | 0  | 159 | 52  | 121 | 132 | 341 | 252 | 51  |  |  |  |  |  |  |  |
| 39.91 | 68 | 0  | 0  | 0  | 256 | 97  | 166 | 130 | 324 | 232 | 73  |  |  |  |  |  |  |  |
| 40.00 | 42 | 0  | 8  | 23 | 192 | 149 | 183 | 223 | 365 | 341 | 58  |  |  |  |  |  |  |  |
| 40.10 | 46 | 5  | 9  | 0  | 251 | 86  | 78  | 187 | 310 | 253 | 74  |  |  |  |  |  |  |  |
| 40.20 | 43 | 8  | 14 | 0  | 213 | 83  | 159 | 232 | 387 | 195 | 78  |  |  |  |  |  |  |  |
| 40.30 | 57 | 35 | 6  | 0  | 203 | 46  | 278 | 331 | 342 | 0   | 70  |  |  |  |  |  |  |  |
| 40.41 | 35 | 8  | 0  | 21 | 251 | 31  | 306 | 300 | 282 | 24  | 59  |  |  |  |  |  |  |  |
| 40.51 | 39 | 0  | 13 | 11 | 198 | 68  | 171 | 223 | 292 | 206 | 52  |  |  |  |  |  |  |  |
| 40.61 | 44 | 0  | 0  | 0  | 158 | 50  | 133 | 110 | 340 | 260 | 37  |  |  |  |  |  |  |  |
| 40.71 | 77 | 0  | 0  | 26 | 250 | 139 | 94  | 183 | 339 | 318 | 84  |  |  |  |  |  |  |  |
| 40.81 | 54 | 0  | 15 | 44 | 261 | 159 | 123 | 286 | 349 | 233 | 66  |  |  |  |  |  |  |  |
| 40.90 | 62 | 0  | 0  | 0  | 215 | 128 | 75  | 181 | 313 | 193 | 44  |  |  |  |  |  |  |  |
| 41.00 | 39 | 19 | 0  | 68 | 203 | 127 | 275 | 310 | 383 | 392 | 64  |  |  |  |  |  |  |  |
| 41.10 | 40 | 8  | 0  | 34 | 242 | 130 | 107 | 140 | 359 | 11  | 66  |  |  |  |  |  |  |  |
| 41.21 | 27 | 25 | 0  | 0  | 217 | 87  | 143 | 284 | 361 | 317 | 76  |  |  |  |  |  |  |  |
| 41.30 | 45 | 25 | 0  | 25 | 180 | 64  | 246 | 240 | 346 | 213 | 65  |  |  |  |  |  |  |  |
| 41.41 | 56 | 8  | 6  | 6  | 261 | 34  | 130 | 320 | 315 | 0   | 53  |  |  |  |  |  |  |  |
| 41.51 | 67 | 0  | 0  | 9  | 199 | 50  | 149 | 436 | 319 | 0   | 80  |  |  |  |  |  |  |  |
| 41.60 | 41 | 10 | 0  | 40 | 210 | 26  | 188 | 255 | 309 | 27  | 81  |  |  |  |  |  |  |  |
| 41.70 | 0  | 5  | 0  | 7  | 233 | 125 | 145 | 243 | 297 | 298 | 17  |  |  |  |  |  |  |  |
| 41.81 | 49 | 0  | 0  | 45 | 203 | 43  | 162 | 192 | 329 | 43  | 41  |  |  |  |  |  |  |  |
| 41.91 | 43 | 0  | 0  | 10 | 226 | 73  | 174 | 254 | 357 | 442 | 65  |  |  |  |  |  |  |  |
| 42.01 | 48 | 0  | 0  | 20 | 268 | 23  | 188 | 126 | 355 | 239 | 43  |  |  |  |  |  |  |  |
| 42.11 | 32 | 0  | 0  | 0  | 184 | 102 | 108 | 205 | 349 | 462 | 63  |  |  |  |  |  |  |  |
| 42.21 | 52 | 9  | 0  | 16 | 227 | 124 | 177 | 266 | 325 | 238 | 78  |  |  |  |  |  |  |  |
| 42.30 | 29 | 0  | 0  | 33 | 250 | 56  | 192 | 244 | 408 | 137 | 54  |  |  |  |  |  |  |  |
| 42.40 | 38 | 8  | 0  | 7  | 275 | 44  | 180 | 190 | 386 | 192 | 41  |  |  |  |  |  |  |  |

|       |    |    |    |    |     |     |     |     |     |     |     |  |  |  |  |  |  |  |  |
|-------|----|----|----|----|-----|-----|-----|-----|-----|-----|-----|--|--|--|--|--|--|--|--|
| 42.50 | 39 | 5  | 0  | 30 | 268 | 79  | 290 | 349 | 348 | 0   | 60  |  |  |  |  |  |  |  |  |
| 42.61 | 76 | 24 | 26 | 0  | 288 | 63  | 372 | 446 | 300 | 0   | 76  |  |  |  |  |  |  |  |  |
| 42.71 | 46 | 0  | 0  | 13 | 204 | 80  | 159 | 437 | 250 | 0   | 84  |  |  |  |  |  |  |  |  |
| 42.81 | 33 | 0  | 0  | 17 | 207 | 63  | 198 | 385 | 284 | 0   | 52  |  |  |  |  |  |  |  |  |
| 42.91 | 26 | 0  | 0  | 27 | 176 | 67  | 153 | 312 | 274 | 162 | 54  |  |  |  |  |  |  |  |  |
| 43.00 | 49 | 0  | 0  | 0  | 203 | 66  | 150 | 122 | 320 | 242 | 55  |  |  |  |  |  |  |  |  |
| 43.10 | 47 | 0  | 0  | 13 | 209 | 175 | 164 | 126 | 286 | 188 | 44  |  |  |  |  |  |  |  |  |
| 43.21 | 51 | 0  | 0  | 0  | 285 | 98  | 157 | 156 | 361 | 528 | 60  |  |  |  |  |  |  |  |  |
| 43.31 | 37 | 0  | 0  | 18 | 263 | 123 | 183 | 170 | 374 | 282 | 69  |  |  |  |  |  |  |  |  |
| 43.40 | 31 | 13 | 0  | 23 | 200 | 127 | 46  | 122 | 392 | 296 | 77  |  |  |  |  |  |  |  |  |
| 43.51 | 35 | 0  | 0  | 0  | 235 | 59  | 227 | 171 | 335 | 389 | 56  |  |  |  |  |  |  |  |  |
| 43.60 | 42 | 0  | 0  | 0  | 268 | 87  | 169 | 225 | 355 | 181 | 29  |  |  |  |  |  |  |  |  |
| 43.71 | 77 | 10 | 0  | 25 | 274 | 144 | 229 | 167 | 368 | 289 | 50  |  |  |  |  |  |  |  |  |
| 43.80 | 69 | 0  | 0  | 14 | 323 | 127 | 226 | 231 | 359 | 33  | 58  |  |  |  |  |  |  |  |  |
| 43.90 | 75 | 0  | 0  | 32 | 275 | 61  | 179 | 259 | 405 | 43  | 68  |  |  |  |  |  |  |  |  |
| 44.00 | 25 | 0  | 0  | 7  | 274 | 62  | 175 | 383 | 355 | 152 | 100 |  |  |  |  |  |  |  |  |
| 44.10 | 48 | 0  | 0  | 15 | 264 | 41  | 206 | 441 | 325 | 119 | 98  |  |  |  |  |  |  |  |  |
| 44.20 | 48 | 0  | 0  | 6  | 203 | 64  | 221 | 365 | 364 | 0   | 70  |  |  |  |  |  |  |  |  |
| 44.31 | 50 | 13 | 0  | 0  | 243 | 76  | 172 | 301 | 274 | 143 | 37  |  |  |  |  |  |  |  |  |
| 44.41 | 64 | 0  | 0  | 0  | 247 | 60  | 267 | 220 | 274 | 177 | 68  |  |  |  |  |  |  |  |  |
| 44.51 | 65 | 0  | 0  | 33 | 221 | 51  | 133 | 188 | 300 | 295 | 52  |  |  |  |  |  |  |  |  |
| 44.61 | 62 | 7  | 16 | 6  | 220 | 105 | 190 | 152 | 325 | 186 | 73  |  |  |  |  |  |  |  |  |
| 44.70 | 37 | 0  | 0  | 37 | 271 | 92  | 232 | 154 | 346 | 306 | 83  |  |  |  |  |  |  |  |  |
| 44.81 | 35 | 0  | 0  | 0  | 204 | 121 | 197 | 133 | 332 | 312 | 60  |  |  |  |  |  |  |  |  |
| 44.90 | 48 | 11 | 0  | 44 | 238 | 139 | 266 | 207 | 359 | 426 | 59  |  |  |  |  |  |  |  |  |
| 45.00 | 37 | 13 | 10 | 8  | 270 | 116 | 77  | 147 | 369 | 416 | 49  |  |  |  |  |  |  |  |  |
| 45.11 | 49 | 0  | 0  | 34 | 228 | 146 | 199 | 169 | 377 | 267 | 46  |  |  |  |  |  |  |  |  |
| 45.21 | 45 | 0  | 11 | 0  | 243 | 110 | 226 | 193 | 384 | 299 | 74  |  |  |  |  |  |  |  |  |
| 45.31 | 48 | 0  | 0  | 0  | 217 | 88  | 194 | 86  | 397 | 366 | 52  |  |  |  |  |  |  |  |  |
| 45.41 | 44 | 12 | 0  | 7  | 267 | 167 | 215 | 208 | 428 | 191 | 52  |  |  |  |  |  |  |  |  |
| 45.51 | 44 | 0  | 7  | 64 | 223 | 119 | 135 | 225 | 412 | 251 | 86  |  |  |  |  |  |  |  |  |
| 45.61 | 28 | 0  | 0  | 11 | 262 | 104 | 127 | 181 | 383 | 90  | 86  |  |  |  |  |  |  |  |  |
| 45.71 | 39 | 18 | 0  | 0  | 267 | 98  | 271 | 375 | 381 | 102 | 59  |  |  |  |  |  |  |  |  |
| 45.80 | 46 | 10 | 5  | 0  | 289 | 115 | 217 | 315 | 397 | 15  | 88  |  |  |  |  |  |  |  |  |
| 45.91 | 60 | 0  | 0  | 31 | 308 | 35  | 311 | 419 | 363 | 0   | 27  |  |  |  |  |  |  |  |  |
| 46.01 | 65 | 26 | 0  | 27 | 281 | 47  | 270 | 374 | 275 | 0   | 63  |  |  |  |  |  |  |  |  |
| 46.11 | 71 | 4  | 8  | 45 | 260 | 47  | 252 | 348 | 280 | 0   | 81  |  |  |  |  |  |  |  |  |
| 46.21 | 53 | 0  | 0  | 10 | 276 | 112 | 193 | 224 | 274 | 0   | 45  |  |  |  |  |  |  |  |  |
| 46.31 | 43 | 0  | 10 | 19 | 210 | 31  | 47  | 215 | 306 | 370 | 52  |  |  |  |  |  |  |  |  |
| 46.40 | 47 | 0  | 0  | 0  | 282 | 128 | 109 | 201 | 347 | 318 | 66  |  |  |  |  |  |  |  |  |
| 46.50 | 26 | 0  | 0  | 0  | 321 | 69  | 137 | 153 | 374 | 153 | 96  |  |  |  |  |  |  |  |  |
| 46.61 | 44 | 0  | 0  | 18 | 301 | 82  | 102 | 169 | 417 | 289 | 66  |  |  |  |  |  |  |  |  |
| 46.71 | 38 | 0  | 0  | 9  | 270 | 95  | 114 | 188 | 405 | 278 | 65  |  |  |  |  |  |  |  |  |
| 46.81 | 39 | 12 | 0  | 5  | 243 | 76  | 123 | 205 | 415 | 252 | 47  |  |  |  |  |  |  |  |  |
| 46.91 | 67 | 0  | 0  | 16 | 246 | 54  | 219 | 187 | 392 | 213 | 72  |  |  |  |  |  |  |  |  |
| 47.01 | 59 | 0  | 0  | 0  | 282 | 84  | 245 | 171 | 393 | 0   | 75  |  |  |  |  |  |  |  |  |
| 47.11 | 79 | 19 | 0  | 26 | 319 | 114 | 198 | 401 | 409 | 198 | 55  |  |  |  |  |  |  |  |  |
| 47.20 | 54 | 5  | 0  | 10 | 338 | 53  | 253 | 351 | 337 | 38  | 70  |  |  |  |  |  |  |  |  |
| 47.30 | 51 | 0  | 17 | 57 | 301 | 48  | 156 | 372 | 294 | 0   | 44  |  |  |  |  |  |  |  |  |
| 47.40 | 28 | 16 | 9  | 0  | 269 | 31  | 216 | 453 | 287 | 0   | 65  |  |  |  |  |  |  |  |  |
| 47.50 | 28 | 17 | 0  | 11 | 254 | 44  | 283 | 303 | 264 | 0   | 50  |  |  |  |  |  |  |  |  |
| 47.61 | 53 | 0  | 0  | 0  | 236 | 89  | 121 | 213 | 263 | 140 | 52  |  |  |  |  |  |  |  |  |
| 47.71 | 45 | 0  | 0  | 41 | 197 | 51  | 218 | 172 | 337 | 129 | 20  |  |  |  |  |  |  |  |  |
| 47.81 | 51 | 0  | 8  | 16 | 269 | 98  | 174 | 239 | 377 | 316 | 70  |  |  |  |  |  |  |  |  |
| 47.91 | 35 | 0  | 17 | 0  | 258 | 112 | 169 | 165 | 357 | 202 | 85  |  |  |  |  |  |  |  |  |
| 48.01 | 52 | 0  | 7  | 0  | 252 | 126 | 188 | 178 | 314 | 293 | 50  |  |  |  |  |  |  |  |  |
| 48.10 | 53 | 0  | 0  | 14 | 243 | 138 | 214 | 149 | 352 | 160 | 61  |  |  |  |  |  |  |  |  |
| 48.20 | 39 | 19 | 14 | 0  | 270 | 66  | 178 | 192 | 352 | 345 | 61  |  |  |  |  |  |  |  |  |

|       |    |    |    |    |     |     |     |     |     |     |     |  |  |  |  |  |  |  |
|-------|----|----|----|----|-----|-----|-----|-----|-----|-----|-----|--|--|--|--|--|--|--|
| 48.30 | 74 | 18 | 19 | 18 | 295 | 52  | 193 | 165 | 373 | 190 | 74  |  |  |  |  |  |  |  |
| 48.41 | 60 | 8  | 0  | 12 | 259 | 47  | 222 | 61  | 405 | 203 | 68  |  |  |  |  |  |  |  |
| 48.51 | 60 | 4  | 12 | 0  | 306 | 133 | 229 | 282 | 374 | 205 | 86  |  |  |  |  |  |  |  |
| 48.61 | 25 | 0  | 9  | 36 | 224 | 139 | 88  | 159 | 370 | 101 | 79  |  |  |  |  |  |  |  |
| 48.71 | 61 | 8  | 0  | 29 | 283 | 97  | 272 | 267 | 307 | 40  | 91  |  |  |  |  |  |  |  |
| 48.81 | 47 | 13 | 11 | 0  | 243 | 35  | 204 | 330 | 318 | 0   | 60  |  |  |  |  |  |  |  |
| 48.91 | 75 | 0  | 0  | 44 | 215 | 44  | 153 | 250 | 291 | 64  | 87  |  |  |  |  |  |  |  |
| 49.01 | 49 | 21 | 0  | 49 | 224 | 40  | 240 | 299 | 260 | 18  | 70  |  |  |  |  |  |  |  |
| 49.11 | 39 | 8  | 0  | 67 | 216 | 86  | 235 | 333 | 260 | 41  | 58  |  |  |  |  |  |  |  |
| 49.21 | 61 | 24 | 13 | 0  | 270 | 96  | 224 | 231 | 313 | 136 | 77  |  |  |  |  |  |  |  |
| 49.31 | 60 | 11 | 0  | 0  | 307 | 105 | 66  | 145 | 352 | 319 | 62  |  |  |  |  |  |  |  |
| 49.41 | 46 | 0  | 0  | 10 | 261 | 111 | 173 | 139 | 316 | 212 | 36  |  |  |  |  |  |  |  |
| 49.51 | 45 | 10 | 0  | 10 | 277 | 123 | 274 | 157 | 344 | 269 | 54  |  |  |  |  |  |  |  |
| 49.60 | 55 | 9  | 0  | 0  | 305 | 130 | 164 | 292 | 415 | 220 | 52  |  |  |  |  |  |  |  |
| 49.71 | 32 | 0  | 23 | 0  | 313 | 103 | 167 | 219 | 403 | 213 | 40  |  |  |  |  |  |  |  |
| 49.80 | 64 | 0  | 0  | 20 | 277 | 123 | 143 | 242 | 398 | 333 | 59  |  |  |  |  |  |  |  |
| 49.90 | 75 | 0  | 0  | 0  | 271 | 108 | 227 | 227 | 370 | 220 | 45  |  |  |  |  |  |  |  |
| 50.01 | 58 | 20 | 0  | 0  | 301 | 56  | 123 | 316 | 462 | 299 | 89  |  |  |  |  |  |  |  |
| 50.11 | 58 | 0  | 21 | 0  | 331 | 15  | 209 | 342 | 431 | 0   | 91  |  |  |  |  |  |  |  |
| 50.20 | 49 | 10 | 0  | 16 | 282 | 57  | 231 | 410 | 411 | 47  | 47  |  |  |  |  |  |  |  |
| 50.30 | 56 | 21 | 22 | 0  | 323 | 62  | 189 | 225 | 373 | 36  | 59  |  |  |  |  |  |  |  |
| 50.41 | 59 | 16 | 0  | 31 | 362 | 71  | 174 | 213 | 353 | 88  | 37  |  |  |  |  |  |  |  |
| 50.50 | 48 | 27 | 0  | 20 | 295 | 101 | 153 | 181 | 371 | 209 | 89  |  |  |  |  |  |  |  |
| 50.61 | 66 | 10 | 0  | 0  | 306 | 50  | 89  | 186 | 348 | 107 | 100 |  |  |  |  |  |  |  |
| 50.70 | 43 | 13 | 0  | 19 | 312 | 47  | 200 | 264 | 383 | 205 | 70  |  |  |  |  |  |  |  |
| 50.81 | 52 | 23 | 12 | 0  | 330 | 136 | 230 | 187 | 407 | 199 | 42  |  |  |  |  |  |  |  |
| 50.91 | 49 | 0  | 25 | 47 | 321 | 57  | 235 | 373 | 385 | 0   | 70  |  |  |  |  |  |  |  |
| 51.01 | 60 | 0  | 0  | 10 | 327 | 63  | 314 | 367 | 324 | 0   | 87  |  |  |  |  |  |  |  |
| 51.11 | 55 | 0  | 20 | 17 | 240 | 79  | 239 | 374 | 298 | 29  | 89  |  |  |  |  |  |  |  |
| 51.21 | 46 | 13 | 0  | 30 | 227 | 61  | 113 | 292 | 299 | 84  | 50  |  |  |  |  |  |  |  |
| 51.31 | 34 | 0  | 0  | 52 | 279 | 85  | 177 | 234 | 308 | 255 | 67  |  |  |  |  |  |  |  |
| 51.40 | 51 | 0  | 0  | 5  | 303 | 81  | 166 | 175 | 351 | 242 | 62  |  |  |  |  |  |  |  |
| 51.51 | 24 | 6  | 0  | 28 | 260 | 104 | 275 | 331 | 358 | 42  | 82  |  |  |  |  |  |  |  |
| 51.60 | 10 | 0  | 0  | 47 | 249 | 101 | 160 | 159 | 379 | 189 | 41  |  |  |  |  |  |  |  |
| 51.71 | 35 | 0  | 0  | 19 | 241 | 122 | 169 | 217 | 389 | 455 | 62  |  |  |  |  |  |  |  |
| 51.81 | 41 | 0  | 13 | 40 | 281 | 121 | 208 | 198 | 393 | 166 | 89  |  |  |  |  |  |  |  |
| 51.91 | 40 | 0  | 0  | 7  | 273 | 101 | 254 | 255 | 373 | 353 | 89  |  |  |  |  |  |  |  |
| 52.00 | 27 | 0  | 0  | 15 | 251 | 146 | 119 | 234 | 406 | 314 | 85  |  |  |  |  |  |  |  |
| 52.10 | 36 | 0  | 0  | 0  | 336 | 117 | 184 | 220 | 440 | 316 | 39  |  |  |  |  |  |  |  |
| 52.21 | 49 | 0  | 6  | 0  | 260 | 47  | 69  | 102 | 336 | 168 | 56  |  |  |  |  |  |  |  |
| 52.30 | 76 | 5  | 15 | 0  | 295 | 82  | 166 | 197 | 421 | 132 | 76  |  |  |  |  |  |  |  |
| 52.40 | 64 | 26 | 6  | 42 | 322 | 24  | 67  | 192 | 372 | 0   | 100 |  |  |  |  |  |  |  |
| 52.51 | 57 | 5  | 22 | 23 | 342 | 51  | 229 | 312 | 386 | 0   | 103 |  |  |  |  |  |  |  |
| 52.61 | 62 | 29 | 4  | 42 | 348 | 31  | 304 | 303 | 338 | 0   | 86  |  |  |  |  |  |  |  |
| 52.71 | 62 | 7  | 0  | 20 | 288 | 21  | 159 | 330 | 285 | 35  | 50  |  |  |  |  |  |  |  |
| 52.80 | 55 | 26 | 20 | 0  | 270 | 51  | 192 | 156 | 283 | 0   | 92  |  |  |  |  |  |  |  |
| 52.91 | 62 | 0  | 0  | 21 | 311 | 62  | 189 | 234 | 332 | 159 | 60  |  |  |  |  |  |  |  |
| 53.01 | 43 | 0  | 21 | 40 | 271 | 57  | 169 | 169 | 301 | 204 | 70  |  |  |  |  |  |  |  |
| 53.11 | 42 | 0  | 0  | 6  | 292 | 53  | 188 | 133 | 335 | 265 | 77  |  |  |  |  |  |  |  |
| 53.20 | 26 | 6  | 0  | 16 | 308 | 72  | 241 | 317 | 354 | 374 | 41  |  |  |  |  |  |  |  |
| 53.31 | 45 | 6  | 21 | 0  | 293 | 101 | 150 | 298 | 399 | 91  | 80  |  |  |  |  |  |  |  |
| 53.40 | 33 | 0  | 0  | 29 | 354 | 61  | 169 | 191 | 420 | 59  | 37  |  |  |  |  |  |  |  |
| 53.50 | 49 | 0  | 0  | 22 | 298 | 21  | 157 | 207 | 392 | 287 | 34  |  |  |  |  |  |  |  |
| 53.60 | 44 | 4  | 10 | 19 | 302 | 75  | 304 | 283 | 405 | 230 | 81  |  |  |  |  |  |  |  |
| 53.71 | 24 | 16 | 0  | 23 | 317 | 99  | 117 | 200 | 416 | 120 | 70  |  |  |  |  |  |  |  |
| 53.81 | 37 | 0  | 22 | 18 | 329 | 57  | 194 | 323 | 425 | 223 | 108 |  |  |  |  |  |  |  |
| 53.90 | 37 | 16 | 9  | 0  | 393 | 44  | 245 | 318 | 395 | 0   | 82  |  |  |  |  |  |  |  |
| 54.00 | 55 | 14 | 0  | 0  | 363 | 60  | 302 | 467 | 332 | 0   | 86  |  |  |  |  |  |  |  |

|       |    |    |    |    |     |     |     |     |     |     |     |  |  |  |  |  |  |  |
|-------|----|----|----|----|-----|-----|-----|-----|-----|-----|-----|--|--|--|--|--|--|--|
| 54.11 | 68 | 11 | 0  | 29 | 258 | 61  | 325 | 322 | 330 | 0   | 56  |  |  |  |  |  |  |  |
| 54.21 | 29 | 0  | 4  | 74 | 292 | 24  | 158 | 239 | 337 | 152 | 62  |  |  |  |  |  |  |  |
| 54.31 | 51 | 9  | 0  | 0  | 320 | 72  | 189 | 240 | 322 | 138 | 68  |  |  |  |  |  |  |  |
| 54.40 | 28 | 0  | 5  | 0  | 339 | 103 | 171 | 185 | 390 | 142 | 60  |  |  |  |  |  |  |  |
| 54.51 | 30 | 0  | 0  | 0  | 347 | 145 | 265 | 312 | 404 | 360 | 55  |  |  |  |  |  |  |  |
| 54.60 | 50 | 12 | 0  | 20 | 310 | 67  | 195 | 220 | 408 | 370 | 51  |  |  |  |  |  |  |  |
| 54.71 | 64 | 8  | 0  | 0  | 297 | 71  | 206 | 200 | 385 | 179 | 49  |  |  |  |  |  |  |  |
| 54.81 | 62 | 5  | 0  | 50 | 326 | 72  | 231 | 526 | 396 | 180 | 91  |  |  |  |  |  |  |  |
| 54.91 | 55 | 23 | 0  | 7  | 334 | 71  | 165 | 764 | 434 | 0   | 70  |  |  |  |  |  |  |  |
| 55.01 | 71 | 34 | 11 | 0  | 332 | 47  | 151 | 830 | 439 | 158 | 75  |  |  |  |  |  |  |  |
| 55.11 | 26 | 9  | 0  | 0  | 340 | 93  | 335 | 625 | 359 | 0   | 70  |  |  |  |  |  |  |  |
| 55.21 | 58 | 28 | 24 | 34 | 326 | 103 | 211 | 440 | 305 | 0   | 95  |  |  |  |  |  |  |  |
| 55.31 | 32 | 0  | 0  | 0  | 323 | 105 | 284 | 341 | 318 | 170 | 46  |  |  |  |  |  |  |  |
| 55.41 | 54 | 26 | 0  | 0  | 295 | 35  | 158 | 269 | 401 | 0   | 64  |  |  |  |  |  |  |  |
| 55.50 | 26 | 9  | 5  | 0  | 309 | 70  | 257 | 263 | 418 | 306 | 93  |  |  |  |  |  |  |  |
| 55.60 | 58 | 6  | 14 | 39 | 277 | 64  | 188 | 234 | 364 | 155 | 104 |  |  |  |  |  |  |  |
| 55.70 | 50 | 14 | 0  | 34 | 302 | 52  | 109 | 164 | 389 | 434 | 67  |  |  |  |  |  |  |  |
| 55.81 | 69 | 28 | 11 | 30 | 328 | 122 | 184 | 109 | 351 | 171 | 71  |  |  |  |  |  |  |  |
| 55.90 | 77 | 15 | 0  | 0  | 310 | 101 | 325 | 207 | 414 | 107 | 75  |  |  |  |  |  |  |  |
| 56.00 | 21 | 0  | 0  | 27 | 304 | 68  | 87  | 252 | 398 | 168 | 63  |  |  |  |  |  |  |  |
| 56.10 | 43 | 12 | 0  | 7  | 286 | 88  | 276 | 221 | 432 | 340 | 98  |  |  |  |  |  |  |  |
| 56.21 | 45 | 7  | 0  | 6  | 294 | 78  | 177 | 340 | 383 | 355 | 57  |  |  |  |  |  |  |  |
| 56.31 | 37 | 5  | 0  | 0  | 381 | 107 | 295 | 241 | 399 | 211 | 91  |  |  |  |  |  |  |  |
| 56.41 | 62 | 25 | 5  | 24 | 369 | 128 | 291 | 344 | 459 | 144 | 92  |  |  |  |  |  |  |  |
| 56.51 | 40 | 19 | 17 | 34 | 296 | 38  | 253 | 291 | 393 | 27  | 76  |  |  |  |  |  |  |  |
| 56.61 | 72 | 17 | 0  | 18 | 305 | 0   | 379 | 449 | 397 | 0   | 86  |  |  |  |  |  |  |  |
| 56.70 | 63 | 6  | 26 | 5  | 279 | 0   | 300 | 382 | 264 | 0   | 91  |  |  |  |  |  |  |  |
| 56.81 | 53 | 6  | 0  | 0  | 272 | 88  | 213 | 280 | 282 | 212 | 56  |  |  |  |  |  |  |  |
| 56.90 | 61 | 5  | 9  | 25 | 250 | 44  | 203 | 290 | 329 | 204 | 61  |  |  |  |  |  |  |  |
| 57.00 | 63 | 9  | 0  | 0  | 316 | 128 | 244 | 141 | 347 | 209 | 96  |  |  |  |  |  |  |  |
| 57.11 | 48 | 21 | 0  | 0  | 250 | 61  | 183 | 101 | 359 | 304 | 79  |  |  |  |  |  |  |  |
| 57.21 | 50 | 0  | 0  | 38 | 278 | 72  | 256 | 209 | 335 | 68  | 43  |  |  |  |  |  |  |  |
| 57.31 | 62 | 0  | 0  | 17 | 316 | 93  | 156 | 225 | 369 | 66  | 65  |  |  |  |  |  |  |  |
| 57.41 | 31 | 0  | 0  | 0  | 318 | 51  | 159 | 173 | 353 | 175 | 118 |  |  |  |  |  |  |  |
| 57.51 | 18 | 0  | 0  | 48 | 291 | 105 | 230 | 257 | 387 | 298 | 87  |  |  |  |  |  |  |  |
| 57.61 | 29 | 0  | 0  | 34 | 352 | 114 | 265 | 275 | 404 | 282 | 74  |  |  |  |  |  |  |  |
| 57.71 | 58 | 0  | 0  | 70 | 340 | 133 | 192 | 272 | 421 | 196 | 72  |  |  |  |  |  |  |  |
| 57.81 | 28 | 0  | 0  | 0  | 352 | 146 | 178 | 258 | 411 | 250 | 48  |  |  |  |  |  |  |  |
| 57.91 | 45 | 0  | 0  | 0  | 329 | 83  | 217 | 273 | 448 | 121 | 92  |  |  |  |  |  |  |  |
| 58.01 | 58 | 0  | 9  | 11 | 413 | 88  | 155 | 259 | 448 | 0   | 104 |  |  |  |  |  |  |  |
| 58.11 | 54 | 0  | 22 | 0  | 352 | 35  | 382 | 395 | 432 | 0   | 86  |  |  |  |  |  |  |  |
| 58.21 | 55 | 6  | 12 | 0  | 339 | 56  | 212 | 344 | 323 | 0   | 92  |  |  |  |  |  |  |  |
| 58.31 | 31 | 5  | 0  | 10 | 315 | 36  | 233 | 276 | 353 | 160 | 72  |  |  |  |  |  |  |  |
| 58.40 | 52 | 39 | 0  | 17 | 271 | 108 | 231 | 249 | 406 | 130 | 53  |  |  |  |  |  |  |  |
| 58.51 | 74 | 0  | 16 | 9  | 258 | 62  | 197 | 208 | 369 | 67  | 60  |  |  |  |  |  |  |  |
| 58.61 | 50 | 0  | 0  | 36 | 290 | 113 | 90  | 241 | 370 | 165 | 56  |  |  |  |  |  |  |  |
| 58.71 | 26 | 0  | 0  | 13 | 274 | 78  | 214 | 263 | 406 | 339 | 42  |  |  |  |  |  |  |  |
| 58.81 | 32 | 8  | 0  | 0  | 289 | 89  | 193 | 197 | 355 | 254 | 63  |  |  |  |  |  |  |  |
| 58.91 | 42 | 16 | 0  | 0  | 299 | 108 | 132 | 216 | 400 | 259 | 60  |  |  |  |  |  |  |  |
| 59.01 | 54 | 0  | 0  | 0  | 310 | 94  | 85  | 117 | 398 | 143 | 116 |  |  |  |  |  |  |  |
| 59.11 | 12 | 0  | 0  | 9  | 396 | 74  | 163 | 220 | 428 | 151 | 67  |  |  |  |  |  |  |  |
| 59.20 | 27 | 0  | 0  | 42 | 313 | 107 | 204 | 176 | 447 | 210 | 65  |  |  |  |  |  |  |  |
| 59.30 | 38 | 14 | 0  | 34 | 309 | 103 | 195 | 279 | 468 | 98  | 69  |  |  |  |  |  |  |  |
| 59.41 | 56 | 0  | 0  | 0  | 337 | 44  | 328 | 389 | 476 | 0   | 61  |  |  |  |  |  |  |  |
| 59.50 | 64 | 26 | 15 | 0  | 344 | 34  | 345 | 532 | 418 | 0   | 75  |  |  |  |  |  |  |  |
| 59.61 | 50 | 30 | 8  | 0  | 402 | 42  | 302 | 333 | 363 | 0   | 54  |  |  |  |  |  |  |  |
| 59.71 | 53 | 0  | 0  | 6  | 406 | 59  | 270 | 329 | 375 | 0   | 85  |  |  |  |  |  |  |  |
| 59.81 | 60 | 0  | 0  | 32 | 268 | 90  | 242 | 364 | 341 | 0   | 81  |  |  |  |  |  |  |  |

|       |    |    |    |    |     |     |     |     |     |     |     |  |  |  |  |  |  |  |
|-------|----|----|----|----|-----|-----|-----|-----|-----|-----|-----|--|--|--|--|--|--|--|
| 59.91 | 54 | 0  | 0  | 12 | 370 | 39  | 228 | 301 | 351 | 0   | 52  |  |  |  |  |  |  |  |
| 60.01 | 46 | 6  | 4  | 13 | 355 | 99  | 218 | 255 | 427 | 0   | 38  |  |  |  |  |  |  |  |
| 60.11 | 60 | 9  | 0  | 0  | 348 | 32  | 277 | 294 | 382 | 199 | 67  |  |  |  |  |  |  |  |
| 60.21 | 47 | 0  | 0  | 0  | 353 | 38  | 205 | 286 | 356 | 221 | 42  |  |  |  |  |  |  |  |
| 60.30 | 47 | 0  | 7  | 21 | 278 | 57  | 133 | 321 | 385 | 104 | 41  |  |  |  |  |  |  |  |
| 60.40 | 71 | 13 | 0  | 0  | 356 | 67  | 168 | 293 | 408 | 282 | 85  |  |  |  |  |  |  |  |
| 60.51 | 23 | 0  | 0  | 0  | 358 | 89  | 258 | 176 | 456 | 465 | 52  |  |  |  |  |  |  |  |
| 60.61 | 29 | 0  | 0  | 10 | 313 | 97  | 90  | 157 | 436 | 234 | 63  |  |  |  |  |  |  |  |
| 60.71 | 42 | 7  | 0  | 21 | 366 | 75  | 223 | 215 | 418 | 278 | 69  |  |  |  |  |  |  |  |
| 60.80 | 40 | 0  | 0  | 35 | 337 | 78  | 79  | 141 | 437 | 326 | 100 |  |  |  |  |  |  |  |
| 60.90 | 36 | 0  | 0  | 0  | 312 | 51  | 193 | 184 | 462 | 279 | 53  |  |  |  |  |  |  |  |
| 61.00 | 33 | 0  | 0  | 33 | 357 | 63  | 235 | 249 | 431 | 104 | 48  |  |  |  |  |  |  |  |
| 61.10 | 56 | 5  | 0  | 9  | 366 | 21  | 172 | 108 | 431 | 339 | 62  |  |  |  |  |  |  |  |
| 61.20 | 42 | 0  | 0  | 27 | 385 | 126 | 217 | 177 | 466 | 435 | 74  |  |  |  |  |  |  |  |
| 61.31 | 33 | 0  | 0  | 0  | 374 | 53  | 77  | 202 | 452 | 311 | 63  |  |  |  |  |  |  |  |
| 61.41 | 66 | 7  | 0  | 70 | 358 | 80  | 268 | 147 | 507 | 242 | 70  |  |  |  |  |  |  |  |
| 61.50 | 24 | 0  | 0  | 0  | 368 | 97  | 193 | 285 | 491 | 156 | 44  |  |  |  |  |  |  |  |
| 61.60 | 78 | 24 | 23 | 40 | 357 | 79  | 295 | 337 | 512 | 0   | 95  |  |  |  |  |  |  |  |
| 61.71 | 75 | 0  | 0  | 0  | 410 | 0   | 259 | 532 | 465 | 144 | 81  |  |  |  |  |  |  |  |
| 61.81 | 82 | 0  | 0  | 0  | 358 | 36  | 316 | 448 | 448 | 0   | 65  |  |  |  |  |  |  |  |
| 61.91 | 77 | 21 | 17 | 0  | 391 | 45  | 226 | 443 | 393 | 0   | 50  |  |  |  |  |  |  |  |
| 62.01 | 82 | 0  | 12 | 38 | 356 | 69  | 259 | 432 | 381 | 0   | 63  |  |  |  |  |  |  |  |
| 62.11 | 80 | 32 | 11 | 0  | 379 | 44  | 215 | 266 | 363 | 213 | 63  |  |  |  |  |  |  |  |
| 62.21 | 44 | 10 | 0  | 5  | 330 | 85  | 113 | 326 | 394 | 161 | 72  |  |  |  |  |  |  |  |
| 62.31 | 45 | 20 | 0  | 12 | 331 | 66  | 174 | 313 | 388 | 0   | 58  |  |  |  |  |  |  |  |
| 62.41 | 52 | 24 | 0  | 38 | 348 | 79  | 251 | 355 | 457 | 0   | 97  |  |  |  |  |  |  |  |
| 62.50 | 53 | 0  | 0  | 15 | 351 | 52  | 130 | 384 | 467 | 149 | 52  |  |  |  |  |  |  |  |
| 62.61 | 55 | 8  | 6  | 13 | 433 | 74  | 276 | 332 | 411 | 36  | 65  |  |  |  |  |  |  |  |
| 62.71 | 70 | 17 | 0  | 25 | 319 | 65  | 140 | 206 | 550 | 31  | 82  |  |  |  |  |  |  |  |
| 62.81 | 45 | 9  | 15 | 20 | 418 | 99  | 211 | 275 | 506 | 144 | 103 |  |  |  |  |  |  |  |
| 62.91 | 86 | 0  | 0  | 0  | 361 | 0   | 190 | 264 | 502 | 149 | 58  |  |  |  |  |  |  |  |
| 63.01 | 41 | 0  | 0  | 10 | 434 | 70  | 260 | 336 | 546 | 0   | 81  |  |  |  |  |  |  |  |
| 63.10 | 59 | 15 | 7  | 19 | 399 | 14  | 162 | 299 | 505 | 160 | 32  |  |  |  |  |  |  |  |
| 63.21 | 50 | 31 | 0  | 0  | 394 | 29  | 186 | 335 | 504 | 120 | 100 |  |  |  |  |  |  |  |
| 63.31 | 37 | 10 | 0  | 12 | 415 | 59  | 232 | 296 | 494 | 71  | 74  |  |  |  |  |  |  |  |
| 63.40 | 36 | 16 | 0  | 0  | 439 | 123 | 350 | 345 | 494 | 302 | 69  |  |  |  |  |  |  |  |
| 63.51 | 6  | 17 | 0  | 0  | 377 | 95  | 227 | 152 | 493 | 98  | 73  |  |  |  |  |  |  |  |
| 63.61 | 53 | 0  | 12 | 18 | 410 | 76  | 263 | 364 | 533 | 96  | 70  |  |  |  |  |  |  |  |
| 63.71 | 66 | 34 | 0  | 19 | 389 | 78  | 339 | 170 | 575 | 196 | 81  |  |  |  |  |  |  |  |
| 63.81 | 62 | 20 | 0  | 19 | 426 | 80  | 324 | 316 | 550 | 141 | 60  |  |  |  |  |  |  |  |
| 63.91 | 43 | 9  | 0  | 0  | 465 | 60  | 209 | 358 | 575 | 156 | 108 |  |  |  |  |  |  |  |
| 64.00 | 52 | 0  | 0  | 0  | 393 | 31  | 258 | 350 | 519 | 202 | 90  |  |  |  |  |  |  |  |
| 64.10 | 44 | 27 | 19 | 30 | 448 | 52  | 369 | 346 | 524 | 0   | 53  |  |  |  |  |  |  |  |
| 64.21 | 54 | 10 | 12 | 0  | 470 | 70  | 226 | 393 | 517 | 87  | 94  |  |  |  |  |  |  |  |
| 64.31 | 71 | 16 | 36 | 16 | 401 | 0   | 273 | 381 | 455 | 63  | 93  |  |  |  |  |  |  |  |
| 64.41 | 66 | 17 | 16 | 18 | 405 | 18  | 306 | 282 | 439 | 53  | 69  |  |  |  |  |  |  |  |
| 64.51 | 83 | 28 | 26 | 28 | 363 | 42  | 159 | 299 | 423 | 242 | 65  |  |  |  |  |  |  |  |
| 64.61 | 59 | 11 | 0  | 32 | 384 | 47  | 187 | 336 | 466 | 167 | 83  |  |  |  |  |  |  |  |
| 64.70 | 40 | 8  | 15 | 0  | 375 | 125 | 241 | 356 | 508 | 237 | 61  |  |  |  |  |  |  |  |
| 64.81 | 27 | 0  | 0  | 46 | 359 | 82  | 313 | 284 | 551 | 155 | 78  |  |  |  |  |  |  |  |
| 64.90 | 28 | 0  | 0  | 8  | 396 | 117 | 162 | 278 | 524 | 115 | 83  |  |  |  |  |  |  |  |
| 65.00 | 39 | 0  | 4  | 0  | 435 | 49  | 229 | 291 | 581 | 0   | 85  |  |  |  |  |  |  |  |
| 65.11 | 68 | 0  | 0  | 17 | 387 | 92  | 144 | 366 | 563 | 64  | 89  |  |  |  |  |  |  |  |
| 65.21 | 52 | 0  | 5  | 23 | 478 | 84  | 243 | 438 | 574 | 104 | 103 |  |  |  |  |  |  |  |
| 65.31 | 63 | 0  | 0  | 20 | 421 | 93  | 346 | 342 | 511 | 250 | 85  |  |  |  |  |  |  |  |
| 65.41 | 55 | 0  | 0  | 5  | 396 | 133 | 293 | 329 | 549 | 88  | 85  |  |  |  |  |  |  |  |
| 65.51 | 61 | 19 | 14 | 39 | 488 | 114 | 210 | 334 | 635 | 105 | 115 |  |  |  |  |  |  |  |
| 65.61 | 14 | 0  | 0  | 16 | 485 | 72  | 329 | 354 | 634 | 57  | 113 |  |  |  |  |  |  |  |

|       |    |    |    |    |     |     |     |     |      |     |     |  |  |  |  |  |  |  |
|-------|----|----|----|----|-----|-----|-----|-----|------|-----|-----|--|--|--|--|--|--|--|
| 65.70 | 48 | 13 | 7  | 14 | 434 | 41  | 294 | 271 | 660  | 0   | 132 |  |  |  |  |  |  |  |
| 65.80 | 35 | 6  | 12 | 6  | 502 | 86  | 237 | 425 | 607  | 227 | 132 |  |  |  |  |  |  |  |
| 65.91 | 51 | 12 | 0  | 0  | 535 | 81  | 249 | 438 | 699  | 88  | 144 |  |  |  |  |  |  |  |
| 66.00 | 53 | 15 | 0  | 8  | 504 | 58  | 215 | 370 | 672  | 82  | 142 |  |  |  |  |  |  |  |
| 66.10 | 50 | 0  | 0  | 0  | 549 | 27  | 356 | 273 | 685  | 0   | 124 |  |  |  |  |  |  |  |
| 66.21 | 58 | 7  | 0  | 12 | 566 | 75  | 304 | 372 | 646  | 0   | 146 |  |  |  |  |  |  |  |
| 66.30 | 61 | 0  | 0  | 16 | 575 | 84  | 330 | 361 | 753  | 55  | 151 |  |  |  |  |  |  |  |
| 66.40 | 68 | 13 | 0  | 21 | 551 | 22  | 371 | 432 | 787  | 100 | 139 |  |  |  |  |  |  |  |
| 66.51 | 55 | 51 | 28 | 0  | 690 | 50  | 271 | 378 | 1027 | 238 | 132 |  |  |  |  |  |  |  |
| 66.61 | 48 | 9  | 0  | 0  | 701 | 48  | 286 | 605 | 1108 | 239 | 148 |  |  |  |  |  |  |  |
| 66.71 | 58 | 13 | 21 | 49 | 625 | 86  | 276 | 462 | 1005 | 138 | 143 |  |  |  |  |  |  |  |
| 66.81 | 43 | 0  | 0  | 6  | 498 | 82  | 310 | 457 | 756  | 61  | 120 |  |  |  |  |  |  |  |
| 66.91 | 49 | 13 | 6  | 0  | 483 | 144 | 392 | 318 | 655  | 0   | 89  |  |  |  |  |  |  |  |
| 67.01 | 25 | 27 | 0  | 0  | 386 | 56  | 305 | 399 | 506  | 247 | 69  |  |  |  |  |  |  |  |
| 67.11 | 57 | 10 | 0  | 0  | 407 | 35  | 293 | 316 | 516  | 0   | 74  |  |  |  |  |  |  |  |
| 67.20 | 66 | 0  | 0  | 32 | 379 | 30  | 250 | 350 | 527  | 159 | 59  |  |  |  |  |  |  |  |
| 67.30 | 53 | 0  | 19 | 14 | 392 | 68  | 109 | 431 | 496  | 140 | 86  |  |  |  |  |  |  |  |
| 67.40 | 61 | 9  | 0  | 15 | 368 | 127 | 216 | 212 | 517  | 370 | 86  |  |  |  |  |  |  |  |
| 67.51 | 38 | 0  | 8  | 0  | 382 | 75  | 192 | 256 | 550  | 96  | 83  |  |  |  |  |  |  |  |
| 67.61 | 33 | 0  | 0  | 0  | 383 | 126 | 150 | 208 | 555  | 220 | 104 |  |  |  |  |  |  |  |
| 67.71 | 51 | 0  | 0  | 0  | 406 | 121 | 161 | 299 | 568  | 344 | 84  |  |  |  |  |  |  |  |
| 67.81 | 61 | 8  | 0  | 0  | 404 | 117 | 179 | 209 | 590  | 270 | 82  |  |  |  |  |  |  |  |
| 67.90 | 22 | 0  | 0  | 19 | 405 | 84  | 156 | 219 | 615  | 281 | 91  |  |  |  |  |  |  |  |
| 68.00 | 49 | 0  | 0  | 0  | 363 | 112 | 193 | 194 | 522  | 174 | 92  |  |  |  |  |  |  |  |
| 68.11 | 50 | 0  | 0  | 18 | 339 | 146 | 112 | 288 | 471  | 245 | 93  |  |  |  |  |  |  |  |
| 68.21 | 45 | 0  | 12 | 13 | 403 | 153 | 228 | 199 | 525  | 311 | 84  |  |  |  |  |  |  |  |
| 68.31 | 48 | 0  | 0  | 18 | 364 | 50  | 199 | 199 | 486  | 236 | 85  |  |  |  |  |  |  |  |
| 68.40 | 42 | 0  | 0  | 24 | 346 | 98  | 105 | 179 | 525  | 140 | 77  |  |  |  |  |  |  |  |
| 68.51 | 68 | 0  | 0  | 41 | 328 | 132 | 219 | 181 | 483  | 399 | 90  |  |  |  |  |  |  |  |
| 68.61 | 62 | 24 | 0  | 0  | 356 | 118 | 187 | 251 | 592  | 330 | 91  |  |  |  |  |  |  |  |
| 68.71 | 30 | 17 | 0  | 0  | 392 | 113 | 184 | 117 | 531  | 402 | 66  |  |  |  |  |  |  |  |
| 68.81 | 55 | 0  | 0  | 22 | 353 | 93  | 136 | 136 | 570  | 355 | 97  |  |  |  |  |  |  |  |
| 68.90 | 55 | 6  | 6  | 61 | 367 | 90  | 191 | 174 | 543  | 328 | 86  |  |  |  |  |  |  |  |
| 69.00 | 21 | 0  | 0  | 24 | 366 | 171 | 124 | 190 | 587  | 281 | 81  |  |  |  |  |  |  |  |
| 69.11 | 54 | 0  | 0  | 19 | 422 | 118 | 250 | 80  | 550  | 234 | 67  |  |  |  |  |  |  |  |
| 69.21 | 37 | 0  | 0  | 7  | 401 | 80  | 150 | 203 | 552  | 440 | 101 |  |  |  |  |  |  |  |
| 69.31 | 50 | 0  | 0  | 0  | 396 | 98  | 187 | 293 | 634  | 424 | 86  |  |  |  |  |  |  |  |
| 69.41 | 54 | 0  | 0  | 26 | 451 | 139 | 175 | 243 | 595  | 226 | 91  |  |  |  |  |  |  |  |
| 69.50 | 49 | 0  | 0  | 31 | 433 | 102 | 215 | 177 | 605  | 277 | 77  |  |  |  |  |  |  |  |
| 69.61 | 32 | 0  | 13 | 37 | 441 | 65  | 159 | 262 | 648  | 253 | 113 |  |  |  |  |  |  |  |
| 69.70 | 53 | 0  | 0  | 8  | 392 | 90  | 300 | 191 | 641  | 150 | 108 |  |  |  |  |  |  |  |
| 69.80 | 57 | 0  | 0  | 0  | 462 | 145 | 177 | 191 | 635  | 182 | 114 |  |  |  |  |  |  |  |
| 69.91 | 35 | 0  | 0  | 21 | 453 | 139 | 286 | 312 | 715  | 250 | 165 |  |  |  |  |  |  |  |
| 70.01 | 56 | 6  | 6  | 0  | 458 | 110 | 170 | 290 | 758  | 219 | 129 |  |  |  |  |  |  |  |
| 70.11 | 35 | 10 | 0  | 20 | 487 | 117 | 288 | 425 | 742  | 234 | 140 |  |  |  |  |  |  |  |
| 70.21 | 60 | 12 | 0  | 0  | 486 | 83  | 269 | 371 | 721  | 128 | 100 |  |  |  |  |  |  |  |
| 70.31 | 52 | 24 | 12 | 10 | 487 | 72  | 179 | 402 | 786  | 138 | 122 |  |  |  |  |  |  |  |
| 70.41 | 74 | 5  | 0  | 13 | 572 | 26  | 121 | 300 | 808  | 0   | 126 |  |  |  |  |  |  |  |
| 70.51 | 61 | 19 | 0  | 0  | 521 | 59  | 293 | 438 | 698  | 0   | 101 |  |  |  |  |  |  |  |
| 70.61 | 65 | 13 | 0  | 64 | 455 | 47  | 286 | 486 | 559  | 40  | 94  |  |  |  |  |  |  |  |
| 70.71 | 23 | 0  | 0  | 14 | 467 | 15  | 272 | 383 | 547  | 25  | 111 |  |  |  |  |  |  |  |
| 70.81 | 39 | 10 | 0  | 0  | 413 | 43  | 227 | 302 | 514  | 271 | 73  |  |  |  |  |  |  |  |
| 70.91 | 97 | 49 | 28 | 0  | 438 | 80  | 329 | 255 | 533  | 189 | 97  |  |  |  |  |  |  |  |
| 71.01 | 34 | 0  | 23 | 23 | 381 | 42  | 205 | 283 | 517  | 147 | 92  |  |  |  |  |  |  |  |
| 71.11 | 41 | 0  | 0  | 11 | 471 | 43  | 266 | 205 | 568  | 35  | 106 |  |  |  |  |  |  |  |
| 71.21 | 63 | 10 | 0  | 35 | 412 | 92  | 108 | 190 | 568  | 220 | 92  |  |  |  |  |  |  |  |
| 71.31 | 44 | 0  | 0  | 0  | 374 | 71  | 121 | 220 | 502  | 148 | 73  |  |  |  |  |  |  |  |
| 71.41 | 60 | 6  | 0  | 0  | 397 | 84  | 243 | 241 | 567  | 189 | 107 |  |  |  |  |  |  |  |

|       |    |    |    |    |     |     |     |     |     |     |     |  |  |  |  |  |  |  |
|-------|----|----|----|----|-----|-----|-----|-----|-----|-----|-----|--|--|--|--|--|--|--|
| 71.51 | 61 | 0  | 0  | 8  | 365 | 61  | 193 | 246 | 567 | 356 | 96  |  |  |  |  |  |  |  |
| 71.61 | 26 | 0  | 0  | 30 | 406 | 145 | 242 | 204 | 593 | 258 | 89  |  |  |  |  |  |  |  |
| 71.70 | 40 | 0  | 0  | 0  | 417 | 77  | 242 | 318 | 704 | 173 | 101 |  |  |  |  |  |  |  |
| 71.80 | 81 | 17 | 28 | 26 | 427 | 131 | 256 | 347 | 725 | 169 | 73  |  |  |  |  |  |  |  |
| 71.91 | 53 | 0  | 0  | 16 | 427 | 100 | 259 | 281 | 611 | 26  | 111 |  |  |  |  |  |  |  |
| 72.01 | 55 | 10 | 0  | 35 | 435 | 56  | 239 | 399 | 614 | 299 | 112 |  |  |  |  |  |  |  |
| 72.11 | 46 | 16 | 24 | 6  | 395 | 109 | 245 | 245 | 603 | 218 | 88  |  |  |  |  |  |  |  |
| 72.21 | 57 | 13 | 0  | 39 | 424 | 52  | 174 | 249 | 602 | 150 | 106 |  |  |  |  |  |  |  |
| 72.30 | 38 | 0  | 0  | 13 | 362 | 117 | 200 | 208 | 585 | 308 | 92  |  |  |  |  |  |  |  |
| 72.41 | 36 | 0  | 0  | 31 | 425 | 92  | 225 | 187 | 565 | 50  | 97  |  |  |  |  |  |  |  |
| 72.51 | 65 | 0  | 0  | 36 | 494 | 58  | 238 | 134 | 571 | 92  | 82  |  |  |  |  |  |  |  |
| 72.61 | 65 | 0  | 9  | 12 | 410 | 64  | 265 | 160 | 563 | 412 | 107 |  |  |  |  |  |  |  |
| 72.70 | 64 | 0  | 0  | 30 | 426 | 96  | 213 | 199 | 602 | 460 | 100 |  |  |  |  |  |  |  |
| 72.80 | 36 | 7  | 7  | 27 | 400 | 207 | 131 | 255 | 624 | 421 | 118 |  |  |  |  |  |  |  |
| 72.91 | 73 | 5  | 0  | 8  | 434 | 138 | 249 | 274 | 615 | 243 | 114 |  |  |  |  |  |  |  |
| 73.01 | 33 | 6  | 0  | 0  | 470 | 43  | 185 | 271 | 637 | 407 | 100 |  |  |  |  |  |  |  |
| 73.11 | 40 | 5  | 0  | 40 | 453 | 77  | 248 | 371 | 615 | 264 | 104 |  |  |  |  |  |  |  |
| 73.21 | 57 | 0  | 0  | 8  | 439 | 80  | 255 | 214 | 679 | 214 | 120 |  |  |  |  |  |  |  |
| 73.31 | 67 | 8  | 0  | 15 | 427 | 141 | 242 | 283 | 632 | 244 | 103 |  |  |  |  |  |  |  |
| 73.40 | 48 | 0  | 0  | 12 | 500 | 131 | 130 | 211 | 656 | 118 | 95  |  |  |  |  |  |  |  |
| 73.51 | 42 | 0  | 4  | 0  | 498 | 155 | 144 | 218 | 755 | 43  | 92  |  |  |  |  |  |  |  |
| 73.61 | 43 | 0  | 0  | 26 | 465 | 88  | 224 | 312 | 777 | 53  | 145 |  |  |  |  |  |  |  |
| 73.71 | 51 | 0  | 12 | 24 | 530 | 71  | 235 | 368 | 802 | 77  | 148 |  |  |  |  |  |  |  |
| 73.81 | 76 | 16 | 0  | 0  | 511 | 82  | 362 | 408 | 764 | 49  | 115 |  |  |  |  |  |  |  |
| 73.91 | 58 | 11 | 0  | 14 | 512 | 60  | 237 | 487 | 665 | 42  | 103 |  |  |  |  |  |  |  |
| 74.01 | 54 | 23 | 0  | 13 | 482 | 73  | 291 | 393 | 581 | 136 | 102 |  |  |  |  |  |  |  |
| 74.11 | 53 | 20 | 17 | 19 | 498 | 52  | 249 | 243 | 585 | 0   | 101 |  |  |  |  |  |  |  |
| 74.21 | 51 | 0  | 0  | 27 | 423 | 26  | 269 | 282 | 526 | 214 | 93  |  |  |  |  |  |  |  |
| 74.30 | 63 | 15 | 23 | 15 | 448 | 60  | 315 | 320 | 572 | 213 | 69  |  |  |  |  |  |  |  |
| 74.41 | 16 | 0  | 0  | 0  | 433 | 148 | 298 | 357 | 589 | 0   | 87  |  |  |  |  |  |  |  |
| 74.51 | 23 | 0  | 0  | 15 | 436 | 78  | 206 | 190 | 629 | 209 | 106 |  |  |  |  |  |  |  |
| 74.60 | 42 | 0  | 12 | 34 | 434 | 75  | 234 | 294 | 724 | 249 | 97  |  |  |  |  |  |  |  |
| 74.70 | 61 | 12 | 16 | 18 | 428 | 73  | 351 | 341 | 701 | 234 | 117 |  |  |  |  |  |  |  |
| 74.81 | 60 | 17 | 5  | 0  | 511 | 125 | 231 | 234 | 639 | 206 | 92  |  |  |  |  |  |  |  |
| 74.91 | 52 | 4  | 6  | 45 | 415 | 75  | 249 | 231 | 642 | 80  | 111 |  |  |  |  |  |  |  |
| 75.00 | 22 | 11 | 0  | 59 | 459 | 70  | 346 | 290 | 634 | 86  | 108 |  |  |  |  |  |  |  |
| 75.11 | 50 | 11 | 21 | 18 | 408 | 112 | 161 | 296 | 679 | 306 | 100 |  |  |  |  |  |  |  |
| 75.21 | 31 | 5  | 15 | 0  | 425 | 108 | 343 | 300 | 649 | 282 | 86  |  |  |  |  |  |  |  |
| 75.31 | 36 | 17 | 0  | 24 | 474 | 104 | 222 | 227 | 723 | 280 | 78  |  |  |  |  |  |  |  |
| 75.41 | 67 | 0  | 0  | 24 | 412 | 123 | 293 | 296 | 687 | 361 | 112 |  |  |  |  |  |  |  |
| 75.51 | 63 | 9  | 0  | 29 | 454 | 103 | 231 | 343 | 624 | 234 | 108 |  |  |  |  |  |  |  |
| 75.61 | 26 | 20 | 16 | 10 | 467 | 95  | 219 | 303 | 642 | 193 | 96  |  |  |  |  |  |  |  |
| 75.70 | 34 | 0  | 0  | 28 | 494 | 52  | 288 | 232 | 717 | 177 | 125 |  |  |  |  |  |  |  |
| 75.80 | 52 | 0  | 0  | 40 | 528 | 98  | 158 | 339 | 715 | 244 | 115 |  |  |  |  |  |  |  |
| 75.91 | 44 | 10 | 0  | 12 | 441 | 44  | 269 | 328 | 711 | 11  | 125 |  |  |  |  |  |  |  |
| 76.00 | 60 | 5  | 0  | 0  | 519 | 81  | 302 | 322 | 682 | 0   | 152 |  |  |  |  |  |  |  |
| 76.11 | 26 | 0  | 7  | 0  | 516 | 88  | 287 | 274 | 708 | 251 | 110 |  |  |  |  |  |  |  |
| 76.20 | 68 | 0  | 0  | 13 | 484 | 67  | 231 | 319 | 735 | 293 | 162 |  |  |  |  |  |  |  |
| 76.31 | 38 | 0  | 0  | 28 | 522 | 68  | 273 | 317 | 743 | 285 | 137 |  |  |  |  |  |  |  |
| 76.41 | 26 | 0  | 6  | 5  | 548 | 38  | 245 | 302 | 801 | 116 | 117 |  |  |  |  |  |  |  |
| 76.51 | 79 | 0  | 0  | 0  | 520 | 22  | 178 | 300 | 778 | 280 | 111 |  |  |  |  |  |  |  |
| 76.61 | 34 | 0  | 0  | 28 | 563 | 82  | 283 | 241 | 804 | 21  | 106 |  |  |  |  |  |  |  |
| 76.71 | 72 | 14 | 17 | 39 | 497 | 42  | 236 | 303 | 771 | 90  | 118 |  |  |  |  |  |  |  |
| 76.81 | 50 | 0  | 0  | 21 | 450 | 96  | 260 | 255 | 767 | 104 | 130 |  |  |  |  |  |  |  |
| 76.91 | 19 | 0  | 0  | 11 | 539 | 62  | 223 | 410 | 861 | 176 | 95  |  |  |  |  |  |  |  |
| 77.01 | 63 | 15 | 0  | 10 | 543 | 26  | 371 | 299 | 835 | 531 | 129 |  |  |  |  |  |  |  |
| 77.11 | 47 | 0  | 4  | 0  | 496 | 62  | 251 | 353 | 786 | 92  | 112 |  |  |  |  |  |  |  |
| 77.21 | 41 | 5  | 0  | 0  | 546 | 54  | 229 | 246 | 852 | 104 | 129 |  |  |  |  |  |  |  |

|       |    |    |    |    |     |     |     |     |      |     |     |  |  |  |  |  |  |  |  |
|-------|----|----|----|----|-----|-----|-----|-----|------|-----|-----|--|--|--|--|--|--|--|--|
| 77.31 | 56 | 0  | 16 | 19 | 564 | 21  | 282 | 255 | 813  | 359 | 117 |  |  |  |  |  |  |  |  |
| 77.41 | 41 | 11 | 0  | 0  | 500 | 69  | 254 | 299 | 884  | 0   | 135 |  |  |  |  |  |  |  |  |
| 77.50 | 38 | 0  | 0  | 28 | 534 | 12  | 250 | 149 | 783  | 107 | 117 |  |  |  |  |  |  |  |  |
| 77.60 | 42 | 7  | 0  | 0  | 460 | 7   | 195 | 394 | 796  | 203 | 112 |  |  |  |  |  |  |  |  |
| 77.71 | 42 | 34 | 0  | 26 | 487 | 34  | 247 | 318 | 856  | 242 | 106 |  |  |  |  |  |  |  |  |
| 77.81 | 66 | 35 | 0  | 0  | 569 | 54  | 210 | 325 | 790  | 145 | 121 |  |  |  |  |  |  |  |  |
| 77.91 | 35 | 8  | 0  | 21 | 463 | 96  | 269 | 253 | 811  | 212 | 115 |  |  |  |  |  |  |  |  |
| 78.01 | 63 | 0  | 0  | 31 | 565 | 79  | 246 | 365 | 842  | 230 | 105 |  |  |  |  |  |  |  |  |
| 78.11 | 60 | 0  | 0  | 0  | 575 | 95  | 274 | 247 | 886  | 138 | 128 |  |  |  |  |  |  |  |  |
| 78.20 | 31 | 0  | 0  | 25 | 511 | 125 | 216 | 332 | 914  | 203 | 114 |  |  |  |  |  |  |  |  |
| 78.30 | 58 | 0  | 0  | 0  | 547 | 33  | 247 | 269 | 933  | 271 | 93  |  |  |  |  |  |  |  |  |
| 78.40 | 43 | 7  | 0  | 23 | 562 | 123 | 260 | 283 | 898  | 209 | 138 |  |  |  |  |  |  |  |  |
| 78.50 | 33 | 0  | 0  | 0  | 496 | 90  | 253 | 255 | 860  | 510 | 151 |  |  |  |  |  |  |  |  |
| 78.61 | 49 | 0  | 0  | 21 | 548 | 57  | 179 | 294 | 892  | 306 | 110 |  |  |  |  |  |  |  |  |
| 78.71 | 53 | 0  | 0  | 0  | 468 | 144 | 198 | 234 | 954  | 228 | 142 |  |  |  |  |  |  |  |  |
| 78.81 | 55 | 0  | 0  | 31 | 495 | 150 | 210 | 244 | 875  | 223 | 141 |  |  |  |  |  |  |  |  |
| 78.91 | 37 | 9  | 0  | 39 | 455 | 98  | 210 | 312 | 837  | 382 | 156 |  |  |  |  |  |  |  |  |
| 79.00 | 33 | 0  | 8  | 17 | 442 | 67  | 141 | 259 | 954  | 337 | 116 |  |  |  |  |  |  |  |  |
| 79.11 | 42 | 0  | 0  | 0  | 471 | 104 | 132 | 220 | 827  | 389 | 125 |  |  |  |  |  |  |  |  |
| 79.21 | 38 | 5  | 7  | 6  | 501 | 155 | 190 | 349 | 861  | 465 | 151 |  |  |  |  |  |  |  |  |
| 79.31 | 53 | 9  | 0  | 34 | 469 | 103 | 195 | 258 | 916  | 283 | 121 |  |  |  |  |  |  |  |  |
| 79.40 | 32 | 0  | 0  | 0  | 439 | 55  | 156 | 254 | 929  | 200 | 149 |  |  |  |  |  |  |  |  |
| 79.50 | 37 | 0  | 0  | 37 | 445 | 80  | 240 | 265 | 897  | 380 | 131 |  |  |  |  |  |  |  |  |
| 79.60 | 8  | 0  | 0  | 26 | 455 | 58  | 183 | 250 | 882  | 191 | 144 |  |  |  |  |  |  |  |  |
| 79.71 | 34 | 0  | 0  | 23 | 437 | 131 | 227 | 260 | 903  | 437 | 121 |  |  |  |  |  |  |  |  |
| 79.81 | 48 | 0  | 0  | 9  | 449 | 120 | 175 | 245 | 891  | 286 | 141 |  |  |  |  |  |  |  |  |
| 79.91 | 47 | 0  | 19 | 13 | 507 | 102 | 145 | 222 | 871  | 375 | 132 |  |  |  |  |  |  |  |  |
| 80.01 | 53 | 0  | 0  | 14 | 465 | 144 | 302 | 290 | 931  | 167 | 136 |  |  |  |  |  |  |  |  |
| 80.11 | 55 | 0  | 30 | 22 | 424 | 99  | 183 | 249 | 947  | 209 | 137 |  |  |  |  |  |  |  |  |
| 80.21 | 39 | 0  | 0  | 6  | 521 | 63  | 261 | 313 | 893  | 245 | 128 |  |  |  |  |  |  |  |  |
| 80.31 | 57 | 5  | 6  | 17 | 487 | 55  | 196 | 252 | 862  | 305 | 132 |  |  |  |  |  |  |  |  |
| 80.41 | 44 | 0  | 0  | 15 | 511 | 81  | 153 | 324 | 944  | 250 | 120 |  |  |  |  |  |  |  |  |
| 80.51 | 41 | 0  | 7  | 8  | 468 | 56  | 219 | 305 | 1012 | 436 | 133 |  |  |  |  |  |  |  |  |
| 80.61 | 61 | 18 | 28 | 0  | 462 | 42  | 239 | 273 | 970  | 347 | 111 |  |  |  |  |  |  |  |  |
| 80.71 | 16 | 15 | 0  | 9  | 524 | 125 | 248 | 346 | 891  | 302 | 124 |  |  |  |  |  |  |  |  |
| 80.80 | 34 | 0  | 0  | 31 | 516 | 104 | 125 | 368 | 959  | 308 | 138 |  |  |  |  |  |  |  |  |
| 80.90 | 80 | 0  | 0  | 30 | 523 | 99  | 222 | 290 | 974  | 342 | 153 |  |  |  |  |  |  |  |  |
| 81.01 | 57 | 0  | 0  | 31 | 667 | 133 | 130 | 194 | 1071 | 237 | 134 |  |  |  |  |  |  |  |  |
| 81.11 | 24 | 4  | 0  | 12 | 570 | 118 | 176 | 261 | 1194 | 370 | 157 |  |  |  |  |  |  |  |  |
| 81.21 | 55 | 0  | 5  | 40 | 604 | 81  | 261 | 340 | 1147 | 399 | 135 |  |  |  |  |  |  |  |  |
| 81.30 | 17 | 10 | 9  | 42 | 518 | 97  | 227 | 270 | 1104 | 38  | 124 |  |  |  |  |  |  |  |  |
| 81.40 | 60 | 15 | 8  | 0  | 491 | 114 | 291 | 227 | 969  | 140 | 91  |  |  |  |  |  |  |  |  |
| 81.51 | 49 | 0  | 7  | 24 | 501 | 80  | 252 | 435 | 861  | 364 | 127 |  |  |  |  |  |  |  |  |
| 81.61 | 52 | 0  | 16 | 20 | 469 | 56  | 171 | 244 | 817  | 44  | 103 |  |  |  |  |  |  |  |  |
| 81.71 | 62 | 9  | 7  | 21 | 418 | 129 | 188 | 316 | 824  | 228 | 115 |  |  |  |  |  |  |  |  |
| 81.80 | 37 | 0  | 0  | 16 | 504 | 55  | 224 | 248 | 836  | 87  | 103 |  |  |  |  |  |  |  |  |
| 81.91 | 17 | 0  | 0  | 0  | 525 | 80  | 270 | 254 | 771  | 448 | 100 |  |  |  |  |  |  |  |  |
| 82.01 | 49 | 0  | 9  | 43 | 479 | 71  | 272 | 357 | 851  | 192 | 126 |  |  |  |  |  |  |  |  |
| 82.11 | 53 | 20 | 16 | 19 | 527 | 118 | 311 | 257 | 847  | 273 | 119 |  |  |  |  |  |  |  |  |
| 82.20 | 60 | 0  | 0  | 30 | 501 | 111 | 320 | 312 | 813  | 308 | 105 |  |  |  |  |  |  |  |  |
| 82.30 | 54 | 9  | 5  | 33 | 494 | 12  | 261 | 310 | 809  | 406 | 119 |  |  |  |  |  |  |  |  |
| 82.40 | 51 | 8  | 0  | 0  | 440 | 112 | 307 | 263 | 833  | 0   | 137 |  |  |  |  |  |  |  |  |
| 82.51 | 41 | 0  | 0  | 42 | 539 | 152 | 262 | 426 | 855  | 337 | 107 |  |  |  |  |  |  |  |  |
| 82.61 | 42 | 0  | 11 | 28 | 510 | 124 | 272 | 332 | 825  | 159 | 148 |  |  |  |  |  |  |  |  |
| 82.70 | 59 | 0  | 0  | 0  | 492 | 83  | 204 | 295 | 744  | 265 | 106 |  |  |  |  |  |  |  |  |
| 82.81 | 77 | 0  | 0  | 0  | 458 | 88  | 232 | 309 | 764  | 253 | 94  |  |  |  |  |  |  |  |  |
| 82.91 | 33 | 7  | 0  | 0  | 453 | 69  | 266 | 354 | 754  | 38  | 124 |  |  |  |  |  |  |  |  |
| 83.01 | 42 | 4  | 0  | 0  | 445 | 55  | 243 | 247 | 708  | 226 | 97  |  |  |  |  |  |  |  |  |

|       |    |    |    |    |     |     |     |     |     |     |     |  |  |  |  |  |  |  |
|-------|----|----|----|----|-----|-----|-----|-----|-----|-----|-----|--|--|--|--|--|--|--|
| 83.11 | 47 | 0  | 0  | 21 | 435 | 91  | 192 | 198 | 690 | 33  | 129 |  |  |  |  |  |  |  |
| 83.21 | 54 | 11 | 0  | 32 | 510 | 52  | 223 | 318 | 690 | 7   | 123 |  |  |  |  |  |  |  |
| 83.30 | 52 | 0  | 0  | 26 | 465 | 141 | 192 | 250 | 690 | 285 | 144 |  |  |  |  |  |  |  |
| 83.40 | 58 | 0  | 5  | 13 | 497 | 69  | 236 | 260 | 765 | 97  | 140 |  |  |  |  |  |  |  |
| 83.51 | 41 | 0  | 7  | 30 | 519 | 134 | 243 | 333 | 772 | 380 | 155 |  |  |  |  |  |  |  |
| 83.61 | 71 | 22 | 5  | 21 | 433 | 63  | 208 | 268 | 724 | 150 | 173 |  |  |  |  |  |  |  |
| 83.71 | 52 | 22 | 0  | 0  | 364 | 124 | 141 | 294 | 796 | 270 | 134 |  |  |  |  |  |  |  |
| 83.81 | 29 | 6  | 0  | 36 | 448 | 91  | 257 | 340 | 712 | 0   | 118 |  |  |  |  |  |  |  |
| 83.91 | 49 | 0  | 9  | 0  | 427 | 140 | 200 | 260 | 727 | 68  | 108 |  |  |  |  |  |  |  |
| 84.01 | 45 | 0  | 0  | 29 | 413 | 73  | 256 | 278 | 668 | 222 | 140 |  |  |  |  |  |  |  |
| 84.11 | 42 | 0  | 0  | 0  | 414 | 61  | 193 | 278 | 674 | 186 | 96  |  |  |  |  |  |  |  |
| 84.20 | 64 | 11 | 0  | 22 | 388 | 97  | 220 | 211 | 668 | 194 | 119 |  |  |  |  |  |  |  |
| 84.30 | 49 | 19 | 7  | 50 | 458 | 106 | 316 | 311 | 690 | 360 | 119 |  |  |  |  |  |  |  |
| 84.40 | 30 | 0  | 0  | 12 | 420 | 148 | 289 | 165 | 655 | 93  | 107 |  |  |  |  |  |  |  |
| 84.51 | 53 | 15 | 9  | 0  | 413 | 131 | 209 | 198 | 657 | 248 | 74  |  |  |  |  |  |  |  |
| 84.61 | 31 | 0  | 0  | 0  | 410 | 95  | 321 | 224 | 681 | 148 | 119 |  |  |  |  |  |  |  |
| 84.71 | 49 | 0  | 0  | 0  | 384 | 40  | 202 | 360 | 687 | 315 | 99  |  |  |  |  |  |  |  |
| 84.81 | 52 | 0  | 0  | 8  | 361 | 74  | 289 | 320 | 637 | 97  | 83  |  |  |  |  |  |  |  |
| 84.91 | 44 | 0  | 0  | 29 | 450 | 95  | 261 | 330 | 746 | 268 | 130 |  |  |  |  |  |  |  |
| 85.00 | 48 | 0  | 0  | 37 | 373 | 68  | 354 | 229 | 757 | 215 | 113 |  |  |  |  |  |  |  |
| 85.11 | 48 | 0  | 0  | 5  | 381 | 106 | 217 | 293 | 818 | 237 | 99  |  |  |  |  |  |  |  |
| 85.21 | 82 | 17 | 13 | 40 | 398 | 81  | 324 | 370 | 689 | 15  | 55  |  |  |  |  |  |  |  |
| 85.31 | 73 | 0  | 0  | 22 | 411 | 149 | 281 | 259 | 652 | 33  | 91  |  |  |  |  |  |  |  |
| 85.41 | 24 | 16 | 10 | 0  | 417 | 127 | 199 | 301 | 704 | 80  | 108 |  |  |  |  |  |  |  |
| 85.50 | 65 | 9  | 19 | 30 | 425 | 110 | 336 | 324 | 659 | 268 | 118 |  |  |  |  |  |  |  |
| 85.60 | 58 | 5  | 0  | 0  | 449 | 106 | 323 | 395 | 635 | 84  | 102 |  |  |  |  |  |  |  |
| 85.71 | 46 | 11 | 0  | 16 | 431 | 72  | 348 | 298 | 680 | 58  | 118 |  |  |  |  |  |  |  |
| 85.81 | 40 | 17 | 8  | 0  | 491 | 75  | 249 | 272 | 648 | 207 | 84  |  |  |  |  |  |  |  |
| 85.91 | 49 | 14 | 7  | 5  | 407 | 48  | 374 | 271 | 706 | 189 | 135 |  |  |  |  |  |  |  |
| 86.01 | 48 | 34 | 5  | 8  | 413 | 136 | 223 | 265 | 634 | 206 | 85  |  |  |  |  |  |  |  |
| 86.11 | 50 | 0  | 0  | 0  | 469 | 83  | 249 | 141 | 617 | 134 | 100 |  |  |  |  |  |  |  |
| 86.20 | 49 | 0  | 11 | 16 | 349 | 123 | 121 | 224 | 635 | 160 | 68  |  |  |  |  |  |  |  |
| 86.30 | 50 | 0  | 0  | 68 | 347 | 96  | 282 | 338 | 631 | 242 | 87  |  |  |  |  |  |  |  |
| 86.40 | 23 | 0  | 9  | 0  | 392 | 254 | 199 | 187 | 654 | 347 | 78  |  |  |  |  |  |  |  |
| 86.51 | 42 | 7  | 0  | 0  | 323 | 422 | 212 | 139 | 690 | 232 | 101 |  |  |  |  |  |  |  |
| 86.60 | 20 | 0  | 0  | 0  | 172 | 421 | 107 | 44  | 508 | 564 | 73  |  |  |  |  |  |  |  |
| 86.70 | 7  | 0  | 0  | 22 | 143 | 220 | 74  | 0   | 223 | 496 | 29  |  |  |  |  |  |  |  |
| 86.81 | 28 | 0  | 0  | 47 | 60  | 63  | 0   | 0   | 47  | 688 | 12  |  |  |  |  |  |  |  |
| 86.90 | 23 | 0  | 0  | 5  | 49  | 102 | 65  | 0   | 23  | 680 | 0   |  |  |  |  |  |  |  |
| 87.01 | 23 | 0  | 0  | 0  | 65  | 59  | 88  | 0   | 26  | 731 | 0   |  |  |  |  |  |  |  |
| 87.11 | 36 | 0  | 0  | 45 | 74  | 69  | 103 | 21  | 28  | 528 | 0   |  |  |  |  |  |  |  |
| 87.21 | 23 | 0  | 0  | 42 | 92  | 54  | 95  | 0   | 24  | 684 | 0   |  |  |  |  |  |  |  |
| 87.31 | 23 | 0  | 0  | 37 | 59  | 88  | 117 | 86  | 37  | 658 | 0   |  |  |  |  |  |  |  |
| 87.41 | 29 | 0  | 0  | 8  | 41  | 78  | 40  | 6   | 15  | 867 | 0   |  |  |  |  |  |  |  |
| 87.51 | 27 | 0  | 0  | 19 | 37  | 72  | 22  | 0   | 13  | 576 | 0   |  |  |  |  |  |  |  |
| 87.60 | 10 | 0  | 0  | 5  | 88  | 67  | 42  | 59  | 30  | 565 | 0   |  |  |  |  |  |  |  |
| 87.70 | 13 | 0  | 0  | 14 | 62  | 67  | 66  | 0   | 52  | 541 | 0   |  |  |  |  |  |  |  |
| 87.80 | 0  | 0  | 0  | 0  | 59  | 99  | 57  | 0   | 56  | 688 | 0   |  |  |  |  |  |  |  |
| 87.91 | 21 | 0  | 0  | 25 | 84  | 89  | 66  | 26  | 57  | 760 | 0   |  |  |  |  |  |  |  |
| 88.00 | 0  | 0  | 0  | 21 | 54  | 98  | 11  | 60  | 26  | 643 | 16  |  |  |  |  |  |  |  |
| 88.10 | 16 | 0  | 0  | 0  | 55  | 78  | 0   | 15  | 32  | 622 | 0   |  |  |  |  |  |  |  |
| 88.20 | 21 | 0  | 0  | 12 | 74  | 40  | 0   | 0   | 19  | 632 | 0   |  |  |  |  |  |  |  |
| 88.31 | 13 | 0  | 0  | 19 | 64  | 94  | 73  | 61  | 41  | 656 | 0   |  |  |  |  |  |  |  |
| 88.40 | 22 | 0  | 0  | 7  | 57  | 104 | 65  | 43  | 52  | 696 | 0   |  |  |  |  |  |  |  |
| 88.50 | 17 | 0  | 0  | 33 | 35  | 27  | 60  | 32  | 15  | 611 | 0   |  |  |  |  |  |  |  |
| 88.60 | 19 | 0  | 0  | 14 | 50  | 65  | 24  | 141 | 20  | 706 | 0   |  |  |  |  |  |  |  |
| 88.71 | 25 | 0  | 0  | 34 | 86  | 78  | 58  | 34  | 58  | 643 | 18  |  |  |  |  |  |  |  |
| 88.81 | 18 | 0  | 0  | 22 | 74  | 41  | 45  | 66  | 47  | 566 | 12  |  |  |  |  |  |  |  |

[illegible]

[illegible]

|       |    |    |   |    |     |     |     |     |    |     |    |  |  |  |  |  |  |  |
|-------|----|----|---|----|-----|-----|-----|-----|----|-----|----|--|--|--|--|--|--|--|
| 25.01 | 15 | 0  | 0 | 0  | 76  | 99  | 67  | 14  | 5  | 415 | 0  |  |  |  |  |  |  |  |
| 25.11 | 24 | 0  | 0 | 0  | 56  | 81  | 47  | 46  | 18 | 197 | 10 |  |  |  |  |  |  |  |
| 25.21 | 41 | 0  | 0 | 28 | 82  | 52  | 112 | 0   | 43 | 509 | 0  |  |  |  |  |  |  |  |
| 25.30 | 23 | 13 | 0 | 0  | 83  | 69  | 55  | 80  | 30 | 240 | 0  |  |  |  |  |  |  |  |
| 25.40 | 51 | 0  | 0 | 0  | 52  | 13  | 178 | 79  | 42 | 241 | 5  |  |  |  |  |  |  |  |
| 25.50 | 26 | 0  | 0 | 0  | 81  | 25  | 61  | 58  | 27 | 177 | 0  |  |  |  |  |  |  |  |
| 25.61 | 49 | 0  | 0 | 32 | 85  | 4   | 104 | 95  | 36 | 326 | 21 |  |  |  |  |  |  |  |
| 25.70 | 48 | 0  | 0 | 0  | 81  | 0   | 16  | 88  | 38 | 174 | 16 |  |  |  |  |  |  |  |
| 25.81 | 56 | 0  | 0 | 0  | 96  | 65  | 23  | 15  | 50 | 266 | 8  |  |  |  |  |  |  |  |
| 25.91 | 26 | 0  | 0 | 11 | 81  | 27  | 66  | 15  | 31 | 438 | 0  |  |  |  |  |  |  |  |
| 26.00 | 22 | 0  | 0 | 13 | 63  | 99  | 53  | 0   | 38 | 420 | 10 |  |  |  |  |  |  |  |
| 26.11 | 19 | 0  | 0 | 21 | 64  | 38  | 56  | 37  | 34 | 320 | 4  |  |  |  |  |  |  |  |
| 26.21 | 28 | 0  | 0 | 14 | 88  | 52  | 81  | 0   | 28 | 420 | 0  |  |  |  |  |  |  |  |
| 26.31 | 38 | 0  | 0 | 0  | 74  | 32  | 119 | 14  | 44 | 362 | 26 |  |  |  |  |  |  |  |
| 26.41 | 41 | 0  | 0 | 10 | 77  | 60  | 89  | 76  | 32 | 348 | 27 |  |  |  |  |  |  |  |
| 26.50 | 30 | 0  | 0 | 28 | 80  | 0   | 41  | 112 | 17 | 194 | 14 |  |  |  |  |  |  |  |
| 26.61 | 38 | 0  | 0 | 8  | 54  | 12  | 84  | 175 | 20 | 146 | 0  |  |  |  |  |  |  |  |
| 26.70 | 40 | 0  | 0 | 0  | 87  | 33  | 70  | 118 | 17 | 271 | 0  |  |  |  |  |  |  |  |
| 26.81 | 36 | 0  | 0 | 16 | 46  | 52  | 48  | 64  | 32 | 294 | 0  |  |  |  |  |  |  |  |
| 26.91 | 60 | 0  | 0 | 24 | 72  | 63  | 36  | 27  | 16 | 540 | 0  |  |  |  |  |  |  |  |
| 27.01 | 56 | 0  | 0 | 9  | 76  | 63  | 77  | 19  | 39 | 401 | 7  |  |  |  |  |  |  |  |
| 27.11 | 32 | 0  | 0 | 0  | 57  | 59  | 0   | 47  | 28 | 266 | 0  |  |  |  |  |  |  |  |
| 27.20 | 68 | 0  | 0 | 36 | 87  | 65  | 33  | 0   | 37 | 258 | 11 |  |  |  |  |  |  |  |
| 27.30 | 52 | 0  | 0 | 0  | 71  | 17  | 52  | 159 | 44 | 146 | 0  |  |  |  |  |  |  |  |
| 27.41 | 46 | 0  | 0 | 0  | 70  | 0   | 0   | 48  | 45 | 155 | 5  |  |  |  |  |  |  |  |
| 27.50 | 54 | 0  | 0 | 32 | 89  | 55  | 27  | 99  | 21 | 135 | 0  |  |  |  |  |  |  |  |
| 27.61 | 40 | 0  | 0 | 0  | 79  | 34  | 15  | 100 | 30 | 251 | 17 |  |  |  |  |  |  |  |
| 27.70 | 17 | 0  | 0 | 0  | 85  | 13  | 28  | 12  | 30 | 0   | 0  |  |  |  |  |  |  |  |
| 27.81 | 56 | 0  | 0 | 0  | 109 | 61  | 0   | 31  | 40 | 417 | 0  |  |  |  |  |  |  |  |
| 27.90 | 48 | 0  | 0 | 23 | 50  | 59  | 73  | 0   | 23 | 347 | 0  |  |  |  |  |  |  |  |
| 28.00 | 23 | 0  | 0 | 28 | 91  | 93  | 66  | 0   | 30 | 356 | 25 |  |  |  |  |  |  |  |
| 28.11 | 32 | 0  | 0 | 10 | 100 | 91  | 0   | 0   | 40 | 359 | 0  |  |  |  |  |  |  |  |
| 28.21 | 44 | 0  | 0 | 22 | 93  | 69  | 33  | 35  | 51 | 403 | 4  |  |  |  |  |  |  |  |
| 28.31 | 8  | 0  | 0 | 6  | 93  | 58  | 116 | 0   | 15 | 413 | 0  |  |  |  |  |  |  |  |
| 28.41 | 33 | 0  | 0 | 17 | 87  | 29  | 88  | 109 | 18 | 13  | 0  |  |  |  |  |  |  |  |
| 28.51 | 29 | 0  | 0 | 27 | 132 | 0   | 0   | 157 | 31 | 92  | 33 |  |  |  |  |  |  |  |
| 28.61 | 41 | 0  | 0 | 20 | 96  | 41  | 102 | 33  | 17 | 220 | 0  |  |  |  |  |  |  |  |
| 28.71 | 24 | 0  | 0 | 19 | 70  | 49  | 0   | 57  | 43 | 327 | 12 |  |  |  |  |  |  |  |
| 28.81 | 38 | 0  | 0 | 16 | 63  | 94  | 9   | 0   | 35 | 190 | 0  |  |  |  |  |  |  |  |
| 28.90 | 38 | 0  | 0 | 0  | 101 | 53  | 85  | 106 | 37 | 492 | 15 |  |  |  |  |  |  |  |
| 29.01 | 49 | 0  | 0 | 0  | 77  | 97  | 0   | 131 | 62 | 390 | 26 |  |  |  |  |  |  |  |
| 29.11 | 47 | 0  | 0 | 0  | 99  | 104 | 140 | 8   | 41 | 383 | 22 |  |  |  |  |  |  |  |
| 29.20 | 49 | 0  | 0 | 21 | 74  | 46  | 95  | 37  | 31 | 180 | 0  |  |  |  |  |  |  |  |
| 29.31 | 55 | 0  | 0 | 20 | 75  | 74  | 67  | 49  | 47 | 341 | 23 |  |  |  |  |  |  |  |
| 29.41 | 50 | 0  | 0 | 10 | 72  | 33  | 27  | 52  | 40 | 235 | 7  |  |  |  |  |  |  |  |
| 29.51 | 34 | 0  | 0 | 0  | 72  | 49  | 0   | 7   | 31 | 311 | 0  |  |  |  |  |  |  |  |
| 29.61 | 29 | 0  | 0 | 16 | 89  | 70  | 110 | 57  | 32 | 375 | 13 |  |  |  |  |  |  |  |
| 29.71 | 15 | 0  | 0 | 0  | 90  | 79  | 130 | 0   | 31 | 497 | 9  |  |  |  |  |  |  |  |
| 29.81 | 49 | 0  | 0 | 16 | 83  | 79  | 71  | 59  | 24 | 276 | 18 |  |  |  |  |  |  |  |
| 29.90 | 31 | 0  | 0 | 0  | 69  | 55  | 0   | 0   | 27 | 306 | 0  |  |  |  |  |  |  |  |
| 30.00 | 42 | 0  | 0 | 0  | 110 | 81  | 0   | 43  | 38 | 470 | 11 |  |  |  |  |  |  |  |
| 30.10 | 29 | 0  | 0 | 29 | 86  | 47  | 0   | 103 | 26 | 331 | 0  |  |  |  |  |  |  |  |
| 30.21 | 64 | 0  | 0 | 25 | 85  | 70  | 0   | 184 | 25 | 61  | 0  |  |  |  |  |  |  |  |
| 30.31 | 43 | 0  | 0 | 0  | 110 | 33  | 56  | 37  | 40 | 130 | 0  |  |  |  |  |  |  |  |
| 30.41 | 36 | 0  | 0 | 0  | 87  | 61  | 66  | 214 | 31 | 241 | 0  |  |  |  |  |  |  |  |
| 30.51 | 41 | 0  | 0 | 16 | 84  | 21  | 15  | 112 | 28 | 290 | 14 |  |  |  |  |  |  |  |
| 30.61 | 49 | 0  | 0 | 17 | 79  | 107 | 47  | 23  | 31 | 347 | 18 |  |  |  |  |  |  |  |
| 30.71 | 49 | 0  | 0 | 0  | 90  | 86  | 73  | 0   | 30 | 416 | 0  |  |  |  |  |  |  |  |

|       |    |    |   |    |     |     |     |     |    |     |    |  |  |  |  |  |  |  |
|-------|----|----|---|----|-----|-----|-----|-----|----|-----|----|--|--|--|--|--|--|--|
| 30.80 | 24 | 0  | 0 | 13 | 84  | 101 | 0   | 0   | 42 | 342 | 11 |  |  |  |  |  |  |  |
| 30.91 | 21 | 0  | 0 | 43 | 123 | 95  | 23  | 0   | 24 | 190 | 22 |  |  |  |  |  |  |  |
| 31.01 | 19 | 0  | 0 | 15 | 75  | 71  | 0   | 51  | 46 | 572 | 10 |  |  |  |  |  |  |  |
| 31.11 | 22 | 0  | 0 | 0  | 96  | 58  | 0   | 0   | 32 | 519 | 0  |  |  |  |  |  |  |  |
| 31.21 | 35 | 0  | 0 | 22 | 92  | 97  | 96  | 46  | 46 | 506 | 10 |  |  |  |  |  |  |  |
| 31.31 | 26 | 0  | 0 | 27 | 99  | 66  | 0   | 43  | 34 | 305 | 25 |  |  |  |  |  |  |  |
| 31.40 | 29 | 0  | 0 | 31 | 106 | 106 | 0   | 18  | 33 | 374 | 11 |  |  |  |  |  |  |  |
| 31.50 | 19 | 0  | 0 | 23 | 69  | 23  | 66  | 99  | 30 | 152 | 7  |  |  |  |  |  |  |  |
| 31.60 | 34 | 0  | 0 | 14 | 84  | 48  | 0   | 0   | 24 | 293 | 18 |  |  |  |  |  |  |  |
| 31.70 | 40 | 0  | 6 | 9  | 93  | 28  | 0   | 94  | 25 | 198 | 19 |  |  |  |  |  |  |  |
| 31.80 | 42 | 6  | 0 | 33 | 104 | 71  | 0   | 103 | 6  | 0   | 8  |  |  |  |  |  |  |  |
| 31.90 | 12 | 0  | 0 | 32 | 66  | 73  | 63  | 29  | 30 | 208 | 0  |  |  |  |  |  |  |  |
| 32.00 | 25 | 0  | 0 | 5  | 86  | 90  | 0   | 55  | 33 | 291 | 31 |  |  |  |  |  |  |  |
| 32.11 | 46 | 0  | 0 | 7  | 97  | 77  | 0   | 0   | 32 | 274 | 4  |  |  |  |  |  |  |  |
| 32.21 | 50 | 0  | 0 | 25 | 92  | 83  | 99  | 90  | 53 | 265 | 9  |  |  |  |  |  |  |  |
| 32.31 | 28 | 0  | 0 | 6  | 45  | 49  | 5   | 0   | 33 | 245 | 23 |  |  |  |  |  |  |  |
| 32.41 | 39 | 0  | 0 | 29 | 91  | 17  | 0   | 0   | 28 | 258 | 21 |  |  |  |  |  |  |  |
| 32.50 | 29 | 0  | 0 | 0  | 106 | 64  | 16  | 99  | 31 | 195 | 6  |  |  |  |  |  |  |  |
| 32.60 | 47 | 0  | 0 | 27 | 97  | 54  | 26  | 61  | 41 | 237 | 0  |  |  |  |  |  |  |  |
| 32.71 | 55 | 0  | 0 | 0  | 71  | 29  | 88  | 116 | 0  | 312 | 17 |  |  |  |  |  |  |  |
| 32.81 | 27 | 8  | 0 | 0  | 90  | 57  | 73  | 32  | 31 | 205 | 0  |  |  |  |  |  |  |  |
| 32.91 | 54 | 0  | 0 | 0  | 121 | 42  | 0   | 49  | 11 | 342 | 17 |  |  |  |  |  |  |  |
| 33.01 | 33 | 0  | 0 | 41 | 101 | 89  | 0   | 39  | 41 | 275 | 0  |  |  |  |  |  |  |  |
| 33.11 | 31 | 0  | 0 | 0  | 58  | 65  | 17  | 6   | 63 | 252 | 9  |  |  |  |  |  |  |  |
| 33.21 | 40 | 0  | 0 | 22 | 79  | 83  | 67  | 23  | 0  | 317 | 0  |  |  |  |  |  |  |  |
| 33.31 | 34 | 0  | 0 | 46 | 42  | 125 | 0   | 39  | 9  | 254 | 0  |  |  |  |  |  |  |  |
| 33.40 | 29 | 0  | 0 | 32 | 97  | 117 | 69  | 49  | 31 | 108 | 0  |  |  |  |  |  |  |  |
| 33.51 | 27 | 0  | 0 | 19 | 61  | 43  | 43  | 37  | 31 | 239 | 31 |  |  |  |  |  |  |  |
| 33.61 | 49 | 0  | 0 | 15 | 69  | 51  | 0   | 97  | 53 | 174 | 7  |  |  |  |  |  |  |  |
| 33.71 | 45 | 0  | 0 | 8  | 73  | 42  | 0   | 0   | 30 | 194 | 0  |  |  |  |  |  |  |  |
| 33.81 | 21 | 0  | 0 | 19 | 97  | 43  | 33  | 30  | 33 | 415 | 0  |  |  |  |  |  |  |  |
| 33.91 | 39 | 0  | 0 | 8  | 96  | 79  | 35  | 0   | 29 | 526 | 0  |  |  |  |  |  |  |  |
| 34.01 | 33 | 0  | 0 | 27 | 93  | 81  | 31  | 99  | 47 | 469 | 6  |  |  |  |  |  |  |  |
| 34.11 | 44 | 0  | 0 | 44 | 91  | 59  | 7   | 65  | 27 | 431 | 5  |  |  |  |  |  |  |  |
| 34.21 | 23 | 0  | 0 | 24 | 87  | 104 | 25  | 41  | 30 | 376 | 28 |  |  |  |  |  |  |  |
| 34.31 | 25 | 0  | 0 | 0  | 103 | 110 | 73  | 32  | 11 | 533 | 0  |  |  |  |  |  |  |  |
| 34.41 | 20 | 0  | 0 | 27 | 69  | 104 | 118 | 0   | 45 | 467 | 0  |  |  |  |  |  |  |  |
| 34.51 | 29 | 0  | 0 | 16 | 95  | 97  | 22  | 0   | 32 | 395 | 5  |  |  |  |  |  |  |  |
| 34.60 | 22 | 0  | 0 | 0  | 92  | 76  | 86  | 20  | 33 | 286 | 0  |  |  |  |  |  |  |  |
| 34.70 | 68 | 0  | 0 | 0  | 77  | 15  | 0   | 67  | 46 | 305 | 12 |  |  |  |  |  |  |  |
| 34.80 | 39 | 26 | 0 | 0  | 96  | 38  | 67  | 54  | 39 | 146 | 0  |  |  |  |  |  |  |  |
| 34.91 | 35 | 0  | 0 | 21 | 58  | 38  | 83  | 26  | 33 | 211 | 9  |  |  |  |  |  |  |  |
| 35.01 | 39 | 0  | 0 | 0  | 58  | 72  | 73  | 11  | 31 | 249 | 7  |  |  |  |  |  |  |  |
| 35.11 | 54 | 0  | 0 | 26 | 54  | 112 | 0   | 67  | 39 | 292 | 0  |  |  |  |  |  |  |  |
| 35.21 | 32 | 0  | 0 | 0  | 81  | 60  | 65  | 7   | 20 | 478 | 0  |  |  |  |  |  |  |  |
| 35.30 | 46 | 0  | 0 | 12 | 98  | 77  | 0   | 0   | 42 | 351 | 0  |  |  |  |  |  |  |  |
| 35.41 | 26 | 0  | 0 | 15 | 67  | 58  | 0   | 78  | 13 | 226 | 0  |  |  |  |  |  |  |  |
| 35.50 | 30 | 0  | 0 | 6  | 43  | 31  | 43  | 47  | 27 | 139 | 18 |  |  |  |  |  |  |  |
| 35.61 | 47 | 0  | 0 | 30 | 75  | 51  | 73  | 12  | 31 | 119 | 0  |  |  |  |  |  |  |  |
| 35.71 | 53 | 0  | 0 | 0  | 75  | 101 | 120 | 49  | 38 | 181 | 17 |  |  |  |  |  |  |  |
| 35.81 | 60 | 0  | 0 | 0  | 56  | 66  | 128 | 97  | 16 | 354 | 4  |  |  |  |  |  |  |  |
| 35.90 | 27 | 0  | 0 | 0  | 107 | 66  | 20  | 0   | 37 | 408 | 5  |  |  |  |  |  |  |  |
| 36.00 | 29 | 0  | 0 | 0  | 103 | 86  | 0   | 24  | 23 | 293 | 0  |  |  |  |  |  |  |  |
| 36.11 | 59 | 0  | 0 | 19 | 80  | 65  | 120 | 6   | 54 | 356 | 8  |  |  |  |  |  |  |  |
| 36.21 | 20 | 0  | 0 | 13 | 17  | 75  | 56  | 94  | 30 | 300 | 0  |  |  |  |  |  |  |  |
| 36.30 | 41 | 0  | 0 | 8  | 44  | 29  | 13  | 40  | 18 | 449 | 11 |  |  |  |  |  |  |  |
| 36.40 | 43 | 0  | 0 | 42 | 122 | 101 | 197 | 158 | 9  | 237 | 16 |  |  |  |  |  |  |  |
| 36.51 | 55 | 12 | 0 | 0  | 63  | 25  | 0   | 109 | 40 | 125 | 14 |  |  |  |  |  |  |  |

|       |    |    |   |    |     |     |     |     |    |     |    |  |  |  |  |  |  |  |
|-------|----|----|---|----|-----|-----|-----|-----|----|-----|----|--|--|--|--|--|--|--|
| 36.61 | 25 | 0  | 0 | 0  | 87  | 31  | 72  | 74  | 14 | 26  | 33 |  |  |  |  |  |  |  |
| 36.70 | 29 | 0  | 0 | 19 | 82  | 107 | 47  | 0   | 37 | 117 | 22 |  |  |  |  |  |  |  |
| 36.80 | 39 | 0  | 0 | 47 | 92  | 88  | 12  | 0   | 56 | 574 | 7  |  |  |  |  |  |  |  |
| 36.91 | 29 | 0  | 0 | 6  | 88  | 89  | 5   | 40  | 55 | 457 | 0  |  |  |  |  |  |  |  |
| 37.00 | 32 | 0  | 0 | 19 | 63  | 42  | 41  | 43  | 46 | 389 | 10 |  |  |  |  |  |  |  |
| 37.10 | 28 | 0  | 0 | 0  | 69  | 100 | 101 | 0   | 33 | 287 | 15 |  |  |  |  |  |  |  |
| 37.21 | 46 | 0  | 0 | 5  | 93  | 92  | 46  | 123 | 46 | 423 | 0  |  |  |  |  |  |  |  |
| 37.31 | 19 | 0  | 0 | 0  | 59  | 59  | 98  | 7   | 46 | 369 | 4  |  |  |  |  |  |  |  |
| 37.40 | 27 | 0  | 0 | 0  | 74  | 68  | 0   | 44  | 31 | 318 | 17 |  |  |  |  |  |  |  |
| 37.51 | 30 | 0  | 0 | 34 | 86  | 86  | 76  | 0   | 63 | 350 | 0  |  |  |  |  |  |  |  |
| 37.61 | 9  | 0  | 0 | 39 | 73  | 111 | 76  | 11  | 55 | 592 | 29 |  |  |  |  |  |  |  |
| 37.70 | 0  | 0  | 0 | 23 | 82  | 138 | 28  | 0   | 19 | 346 | 0  |  |  |  |  |  |  |  |
| 37.80 | 35 | 0  | 0 | 11 | 78  | 104 | 0   | 53  | 20 | 505 | 4  |  |  |  |  |  |  |  |
| 37.91 | 20 | 0  | 0 | 24 | 78  | 57  | 29  | 62  | 9  | 357 | 0  |  |  |  |  |  |  |  |
| 38.00 | 15 | 0  | 0 | 27 | 49  | 44  | 132 | 0   | 43 | 534 | 24 |  |  |  |  |  |  |  |
| 38.11 | 34 | 0  | 0 | 25 | 72  | 71  | 7   | 13  | 36 | 432 | 23 |  |  |  |  |  |  |  |
| 38.21 | 34 | 0  | 0 | 43 | 83  | 87  | 58  | 0   | 0  | 509 | 8  |  |  |  |  |  |  |  |
| 38.31 | 23 | 0  | 0 | 26 | 47  | 73  | 0   | 0   | 36 | 554 | 0  |  |  |  |  |  |  |  |
| 38.41 | 0  | 0  | 0 | 27 | 90  | 123 | 0   | 0   | 41 | 578 | 5  |  |  |  |  |  |  |  |
| 38.51 | 24 | 0  | 0 | 0  | 65  | 91  | 20  | 9   | 46 | 570 | 0  |  |  |  |  |  |  |  |
| 38.61 | 41 | 0  | 0 | 7  | 70  | 87  | 14  | 0   | 28 | 382 | 16 |  |  |  |  |  |  |  |
| 38.70 | 38 | 0  | 0 | 0  | 82  | 92  | 31  | 0   | 33 | 217 | 0  |  |  |  |  |  |  |  |
| 38.81 | 20 | 0  | 0 | 0  | 71  | 84  | 0   | 0   | 40 | 339 | 11 |  |  |  |  |  |  |  |
| 38.91 | 34 | 0  | 0 | 0  | 50  | 88  | 44  | 25  | 27 | 161 | 0  |  |  |  |  |  |  |  |
| 39.01 | 41 | 0  | 0 | 11 | 53  | 74  | 0   | 0   | 58 | 238 | 0  |  |  |  |  |  |  |  |
| 39.11 | 24 | 0  | 0 | 12 | 84  | 56  | 90  | 0   | 19 | 535 | 4  |  |  |  |  |  |  |  |
| 39.21 | 42 | 0  | 0 | 0  | 95  | 47  | 0   | 15  | 26 | 307 | 11 |  |  |  |  |  |  |  |
| 39.31 | 0  | 0  | 0 | 31 | 69  | 79  | 13  | 18  | 34 | 391 | 9  |  |  |  |  |  |  |  |
| 39.41 | 30 | 0  | 0 | 7  | 79  | 95  | 0   | 0   | 28 | 673 | 0  |  |  |  |  |  |  |  |
| 39.51 | 0  | 0  | 0 | 20 | 75  | 128 | 57  | 30  | 41 | 268 | 14 |  |  |  |  |  |  |  |
| 39.61 | 7  | 0  | 0 | 29 | 72  | 133 | 0   | 0   | 45 | 395 | 0  |  |  |  |  |  |  |  |
| 39.70 | 5  | 0  | 0 | 5  | 62  | 133 | 48  | 0   | 38 | 454 | 4  |  |  |  |  |  |  |  |
| 39.81 | 39 | 0  | 0 | 16 | 57  | 149 | 0   | 21  | 50 | 411 | 0  |  |  |  |  |  |  |  |
| 39.90 | 11 | 0  | 0 | 32 | 67  | 115 | 32  | 58  | 37 | 393 | 18 |  |  |  |  |  |  |  |
| 40.01 | 26 | 0  | 0 | 33 | 81  | 41  | 88  | 61  | 65 | 331 | 34 |  |  |  |  |  |  |  |
| 40.11 | 45 | 0  | 0 | 6  | 62  | 69  | 80  | 205 | 68 | 173 | 0  |  |  |  |  |  |  |  |
| 40.21 | 44 | 0  | 0 | 0  | 36  | 17  | 120 | 145 | 48 | 184 | 0  |  |  |  |  |  |  |  |
| 40.31 | 24 | 0  | 0 | 0  | 113 | 91  | 18  | 95  | 48 | 218 | 17 |  |  |  |  |  |  |  |
| 40.41 | 60 | 0  | 0 | 20 | 84  | 83  | 0   | 55  | 27 | 333 | 0  |  |  |  |  |  |  |  |
| 40.51 | 39 | 0  | 0 | 17 | 82  | 67  | 29  | 62  | 38 | 307 | 0  |  |  |  |  |  |  |  |
| 40.60 | 7  | 0  | 0 | 0  | 106 | 102 | 0   | 17  | 41 | 154 | 0  |  |  |  |  |  |  |  |
| 40.71 | 30 | 0  | 0 | 0  | 67  | 24  | 0   | 71  | 16 | 289 | 0  |  |  |  |  |  |  |  |
| 40.81 | 24 | 0  | 0 | 16 | 44  | 98  | 0   | 56  | 33 | 222 | 0  |  |  |  |  |  |  |  |
| 40.90 | 17 | 0  | 0 | 11 | 71  | 53  | 27  | 7   | 40 | 219 | 6  |  |  |  |  |  |  |  |
| 41.01 | 45 | 0  | 0 | 20 | 58  | 57  | 38  | 0   | 40 | 284 | 0  |  |  |  |  |  |  |  |
| 41.11 | 65 | 0  | 0 | 48 | 73  | 44  | 0   | 61  | 38 | 323 | 0  |  |  |  |  |  |  |  |
| 41.20 | 56 | 0  | 0 | 19 | 59  | 39  | 0   | 146 | 34 | 130 | 23 |  |  |  |  |  |  |  |
| 41.31 | 37 | 0  | 0 | 28 | 101 | 49  | 88  | 42  | 28 | 151 | 5  |  |  |  |  |  |  |  |
| 41.41 | 65 | 12 | 0 | 0  | 95  | 64  | 70  | 110 | 23 | 163 | 0  |  |  |  |  |  |  |  |
| 41.50 | 31 | 0  | 0 | 9  | 87  | 63  | 96  | 0   | 50 | 258 | 0  |  |  |  |  |  |  |  |
| 41.61 | 36 | 0  | 0 | 0  | 57  | 78  | 106 | 71  | 25 | 442 | 0  |  |  |  |  |  |  |  |
| 41.71 | 21 | 0  | 0 | 19 | 73  | 96  | 0   | 0   | 38 | 308 | 0  |  |  |  |  |  |  |  |
| 41.81 | 26 | 0  | 0 | 11 | 78  | 100 | 18  | 124 | 25 | 525 | 0  |  |  |  |  |  |  |  |
| 41.91 | 8  | 0  | 0 | 24 | 80  | 100 | 83  | 54  | 35 | 399 | 23 |  |  |  |  |  |  |  |
| 42.01 | 14 | 0  | 0 | 48 | 87  | 41  | 21  | 36  | 55 | 135 | 8  |  |  |  |  |  |  |  |
| 42.11 | 12 | 0  | 0 | 62 | 82  | 75  | 78  | 0   | 49 | 496 | 15 |  |  |  |  |  |  |  |
| 42.20 | 36 | 0  | 0 | 14 | 111 | 44  | 0   | 83  | 38 | 65  | 0  |  |  |  |  |  |  |  |
| 42.31 | 67 | 4  | 0 | 0  | 85  | 86  | 20  | 127 | 28 | 10  | 15 |  |  |  |  |  |  |  |

|       |    |    |   |    |     |     |     |     |     |     |    |  |  |  |  |  |  |  |
|-------|----|----|---|----|-----|-----|-----|-----|-----|-----|----|--|--|--|--|--|--|--|
| 42.40 | 0  | 0  | 0 | 0  | 47  | 28  | 70  | 124 | 13  | 0   | 0  |  |  |  |  |  |  |  |
| 42.50 | 29 | 0  | 0 | 7  | 74  | 67  | 45  | 166 | 48  | 259 | 0  |  |  |  |  |  |  |  |
| 42.60 | 5  | 0  | 0 | 8  | 95  | 60  | 93  | 102 | 17  | 425 | 43 |  |  |  |  |  |  |  |
| 42.70 | 25 | 0  | 0 | 17 | 80  | 93  | 110 | 48  | 27  | 477 | 11 |  |  |  |  |  |  |  |
| 42.81 | 37 | 0  | 0 | 0  | 72  | 69  | 0   | 0   | 25  | 249 | 0  |  |  |  |  |  |  |  |
| 42.91 | 12 | 0  | 0 | 0  | 58  | 57  | 0   | 0   | 49  | 197 | 9  |  |  |  |  |  |  |  |
| 43.00 | 11 | 0  | 0 | 0  | 105 | 48  | 65  | 82  | 16  | 526 | 6  |  |  |  |  |  |  |  |
| 43.10 | 17 | 0  | 0 | 10 | 91  | 65  | 76  | 17  | 86  | 393 | 0  |  |  |  |  |  |  |  |
| 43.21 | 49 | 0  | 0 | 29 | 86  | 116 | 103 | 0   | 171 | 332 | 12 |  |  |  |  |  |  |  |
| 43.30 | 29 | 5  | 0 | 0  | 102 | 90  | 103 | 81  | 142 | 228 | 0  |  |  |  |  |  |  |  |
| 43.41 | 38 | 0  | 0 | 18 | 85  | 57  | 47  | 93  | 51  | 105 | 16 |  |  |  |  |  |  |  |
| 43.50 | 27 | 0  | 0 | 0  | 78  | 31  | 0   | 188 | 34  | 15  | 0  |  |  |  |  |  |  |  |
| 43.61 | 49 | 0  | 0 | 0  | 93  | 13  | 0   | 28  | 26  | 0   | 21 |  |  |  |  |  |  |  |
| 43.71 | 45 | 0  | 0 | 0  | 81  | 25  | 99  | 67  | 38  | 265 | 0  |  |  |  |  |  |  |  |
| 43.80 | 44 | 0  | 0 | 12 | 93  | 88  | 40  | 62  | 24  | 0   | 0  |  |  |  |  |  |  |  |
| 43.90 | 62 | 0  | 0 | 20 | 59  | 83  | 122 | 31  | 43  | 442 | 7  |  |  |  |  |  |  |  |
| 44.01 | 24 | 0  | 0 | 36 | 75  | 55  | 50  | 0   | 34  | 262 | 0  |  |  |  |  |  |  |  |
| 44.10 | 17 | 0  | 0 | 0  | 92  | 36  | 31  | 0   | 35  | 445 | 0  |  |  |  |  |  |  |  |
| 44.20 | 32 | 0  | 0 | 39 | 111 | 91  | 37  | 11  | 51  | 292 | 17 |  |  |  |  |  |  |  |
| 44.31 | 26 | 0  | 0 | 23 | 56  | 130 | 67  | 0   | 44  | 210 | 4  |  |  |  |  |  |  |  |
| 44.41 | 48 | 0  | 0 | 15 | 64  | 81  | 81  | 13  | 36  | 289 | 0  |  |  |  |  |  |  |  |
| 44.51 | 29 | 0  | 0 | 12 | 86  | 119 | 68  | 77  | 17  | 400 | 0  |  |  |  |  |  |  |  |
| 44.60 | 21 | 0  | 0 | 0  | 71  | 76  | 0   | 0   | 16  | 351 | 12 |  |  |  |  |  |  |  |
| 44.70 | 25 | 0  | 0 | 6  | 84  | 98  | 0   | 0   | 37  | 249 | 7  |  |  |  |  |  |  |  |
| 44.81 | 17 | 0  | 0 | 0  | 128 | 43  | 0   | 97  | 37  | 187 | 0  |  |  |  |  |  |  |  |
| 44.90 | 42 | 0  | 0 | 46 | 89  | 65  | 141 | 134 | 27  | 223 | 13 |  |  |  |  |  |  |  |
| 45.01 | 55 | 0  | 0 | 13 | 45  | 16  | 96  | 156 | 9   | 152 | 6  |  |  |  |  |  |  |  |
| 45.10 | 47 | 0  | 0 | 0  | 59  | 69  | 151 | 107 | 36  | 237 | 0  |  |  |  |  |  |  |  |
| 45.21 | 17 | 0  | 0 | 22 | 70  | 62  | 97  | 0   | 50  | 30  | 0  |  |  |  |  |  |  |  |
| 45.31 | 10 | 0  | 0 | 15 | 63  | 28  | 24  | 0   | 40  | 468 | 12 |  |  |  |  |  |  |  |
| 45.41 | 13 | 0  | 0 | 24 | 74  | 82  | 0   | 52  | 40  | 293 | 0  |  |  |  |  |  |  |  |
| 45.51 | 39 | 0  | 0 | 6  | 109 | 66  | 14  | 0   | 20  | 204 | 0  |  |  |  |  |  |  |  |
| 45.60 | 30 | 0  | 0 | 24 | 114 | 20  | 83  | 4   | 15  | 422 | 0  |  |  |  |  |  |  |  |
| 45.71 | 36 | 4  | 0 | 0  | 114 | 74  | 90  | 51  | 49  | 333 | 12 |  |  |  |  |  |  |  |
| 45.81 | 20 | 0  | 0 | 34 | 96  | 51  | 81  | 46  | 51  | 503 | 18 |  |  |  |  |  |  |  |
| 45.91 | 10 | 0  | 0 | 26 | 109 | 69  | 77  | 0   | 34  | 363 | 18 |  |  |  |  |  |  |  |
| 46.01 | 0  | 0  | 0 | 11 | 56  | 129 | 0   | 75  | 25  | 459 | 0  |  |  |  |  |  |  |  |
| 46.11 | 12 | 0  | 0 | 25 | 70  | 47  | 71  | 0   | 36  | 314 | 0  |  |  |  |  |  |  |  |
| 46.20 | 42 | 0  | 0 | 9  | 91  | 141 | 69  | 0   | 62  | 310 | 14 |  |  |  |  |  |  |  |
| 46.31 | 50 | 0  | 0 | 29 | 91  | 94  | 89  | 56  | 34  | 137 | 6  |  |  |  |  |  |  |  |
| 46.40 | 34 | 5  | 0 | 24 | 63  | 72  | 0   | 55  | 38  | 491 | 14 |  |  |  |  |  |  |  |
| 46.51 | 54 | 0  | 0 | 17 | 85  | 64  | 128 | 108 | 50  | 258 | 18 |  |  |  |  |  |  |  |
| 46.61 | 20 | 0  | 0 | 0  | 100 | 71  | 109 | 122 | 34  | 190 | 5  |  |  |  |  |  |  |  |
| 46.71 | 59 | 6  | 0 | 0  | 111 | 77  | 58  | 148 | 48  | 80  | 0  |  |  |  |  |  |  |  |
| 46.81 | 45 | 0  | 0 | 24 | 69  | 7   | 0   | 115 | 35  | 58  | 0  |  |  |  |  |  |  |  |
| 46.90 | 71 | 19 | 0 | 20 | 69  | 62  | 104 | 50  | 21  | 193 | 5  |  |  |  |  |  |  |  |
| 47.01 | 51 | 0  | 0 | 7  | 70  | 18  | 0   | 58  | 42  | 124 | 5  |  |  |  |  |  |  |  |
| 47.10 | 38 | 0  | 0 | 19 | 87  | 59  | 96  | 17  | 6   | 486 | 0  |  |  |  |  |  |  |  |
| 47.21 | 37 | 0  | 0 | 19 | 104 | 53  | 6   | 0   | 46  | 288 | 0  |  |  |  |  |  |  |  |
| 47.31 | 32 | 0  | 0 | 13 | 90  | 57  | 19  | 12  | 23  | 283 | 5  |  |  |  |  |  |  |  |
| 47.41 | 14 | 0  | 0 | 27 | 50  | 54  | 38  | 0   | 16  | 371 | 25 |  |  |  |  |  |  |  |
| 47.51 | 32 | 0  | 0 | 8  | 47  | 56  | 0   | 78  | 47  | 151 | 17 |  |  |  |  |  |  |  |
| 47.61 | 36 | 0  | 0 | 23 | 89  | 73  | 45  | 56  | 41  | 419 | 0  |  |  |  |  |  |  |  |
| 47.70 | 20 | 0  | 0 | 10 | 89  | 75  | 0   | 0   | 30  | 357 | 5  |  |  |  |  |  |  |  |
| 47.81 | 38 | 0  | 0 | 24 | 96  | 49  | 47  | 0   | 18  | 321 | 29 |  |  |  |  |  |  |  |
| 47.90 | 53 | 0  | 0 | 16 | 69  | 24  | 38  | 57  | 43  | 295 | 20 |  |  |  |  |  |  |  |
| 48.00 | 26 | 0  | 0 | 0  | 84  | 38  | 102 | 123 | 28  | 299 | 13 |  |  |  |  |  |  |  |
| 48.11 | 42 | 0  | 0 | 13 | 121 | 8   | 52  | 82  | 50  | 124 | 0  |  |  |  |  |  |  |  |

|       |    |    |   |    |     |     |     |     |    |     |    |  |  |  |  |  |  |  |
|-------|----|----|---|----|-----|-----|-----|-----|----|-----|----|--|--|--|--|--|--|--|
| 48.20 | 61 | 0  | 0 | 5  | 79  | 52  | 131 | 202 | 16 | 231 | 0  |  |  |  |  |  |  |  |
| 48.31 | 52 | 0  | 0 | 18 | 63  | 69  | 20  | 44  | 36 | 276 | 0  |  |  |  |  |  |  |  |
| 48.41 | 45 | 0  | 0 | 9  | 89  | 70  | 64  | 0   | 29 | 331 | 26 |  |  |  |  |  |  |  |
| 48.51 | 54 | 0  | 0 | 17 | 100 | 42  | 0   | 109 | 36 | 315 | 27 |  |  |  |  |  |  |  |
| 48.61 | 40 | 19 | 0 | 0  | 94  | 93  | 9   | 0   | 31 | 347 | 0  |  |  |  |  |  |  |  |
| 48.71 | 38 | 0  | 0 | 0  | 70  | 114 | 103 | 0   | 43 | 332 | 16 |  |  |  |  |  |  |  |
| 48.81 | 20 | 0  | 0 | 22 | 88  | 73  | 52  | 0   | 28 | 424 | 9  |  |  |  |  |  |  |  |
| 48.91 | 37 | 0  | 0 | 38 | 74  | 68  | 33  | 64  | 31 | 194 | 0  |  |  |  |  |  |  |  |
| 49.00 | 53 | 0  | 0 | 19 | 86  | 55  | 78  | 11  | 27 | 354 | 0  |  |  |  |  |  |  |  |
| 49.11 | 36 | 0  | 0 | 33 | 73  | 49  | 89  | 0   | 32 | 275 | 11 |  |  |  |  |  |  |  |
| 49.20 | 34 | 0  | 0 | 0  | 92  | 49  | 11  | 99  | 17 | 473 | 18 |  |  |  |  |  |  |  |
| 49.31 | 31 | 0  | 0 | 40 | 80  | 83  | 49  | 0   | 15 | 472 | 11 |  |  |  |  |  |  |  |
| 49.41 | 27 | 0  | 0 | 36 | 99  | 56  | 113 | 90  | 35 | 280 | 19 |  |  |  |  |  |  |  |
| 49.51 | 54 | 14 | 0 | 30 | 93  | 41  | 36  | 78  | 33 | 280 | 10 |  |  |  |  |  |  |  |
| 49.61 | 44 | 0  | 0 | 12 | 28  | 45  | 0   | 91  | 18 | 0   | 0  |  |  |  |  |  |  |  |
| 49.71 | 32 | 0  | 0 | 13 | 65  | 35  | 84  | 70  | 46 | 129 | 16 |  |  |  |  |  |  |  |
| 49.80 | 17 | 0  | 0 | 16 | 91  | 69  | 109 | 85  | 13 | 34  | 24 |  |  |  |  |  |  |  |
| 49.90 | 37 | 0  | 0 | 6  | 37  | 34  | 78  | 24  | 21 | 194 | 0  |  |  |  |  |  |  |  |
| 50.01 | 11 | 0  | 0 | 24 | 58  | 54  | 6   | 88  | 50 | 271 | 5  |  |  |  |  |  |  |  |
| 50.10 | 27 | 0  | 0 | 25 | 60  | 72  | 0   | 25  | 18 | 161 | 15 |  |  |  |  |  |  |  |
| 50.20 | 58 | 0  | 0 | 18 | 96  | 57  | 20  | 50  | 0  | 256 | 0  |  |  |  |  |  |  |  |
| 50.31 | 34 | 0  | 0 | 43 | 75  | 65  | 26  | 15  | 44 | 119 | 22 |  |  |  |  |  |  |  |
| 50.41 | 43 | 0  | 0 | 25 | 95  | 93  | 41  | 65  | 51 | 341 | 0  |  |  |  |  |  |  |  |
| 50.50 | 31 | 0  | 0 | 5  | 80  | 46  | 0   | 71  | 21 | 393 | 0  |  |  |  |  |  |  |  |
| 50.61 | 51 | 0  | 0 | 10 | 68  | 22  | 43  | 36  | 21 | 350 | 0  |  |  |  |  |  |  |  |
| 50.70 | 38 | 0  | 0 | 0  | 81  | 113 | 74  | 37  | 36 | 223 | 8  |  |  |  |  |  |  |  |
| 50.81 | 51 | 0  | 0 | 42 | 58  | 50  | 66  | 33  | 47 | 444 | 0  |  |  |  |  |  |  |  |
| 50.91 | 56 | 0  | 0 | 0  | 101 | 13  | 0   | 45  | 63 | 253 | 15 |  |  |  |  |  |  |  |
| 51.00 | 67 | 0  | 0 | 25 | 100 | 71  | 55  | 123 | 34 | 392 | 0  |  |  |  |  |  |  |  |
| 51.11 | 0  | 0  | 0 | 7  | 83  | 57  | 117 | 116 | 42 | 175 | 15 |  |  |  |  |  |  |  |
| 51.21 | 11 | 0  | 0 | 20 | 107 | 78  | 0   | 83  | 57 | 246 | 10 |  |  |  |  |  |  |  |
| 51.31 | 26 | 0  | 0 | 0  | 69  | 63  | 124 | 31  | 52 | 355 | 27 |  |  |  |  |  |  |  |
| 51.41 | 8  | 0  | 0 | 0  | 81  | 93  | 15  | 99  | 37 | 383 | 0  |  |  |  |  |  |  |  |
| 51.51 | 34 | 0  | 0 | 0  | 58  | 70  | 7   | 17  | 60 | 435 | 15 |  |  |  |  |  |  |  |
| 51.61 | 49 | 0  | 0 | 0  | 65  | 22  | 79  | 94  | 39 | 183 | 20 |  |  |  |  |  |  |  |
| 51.71 | 56 | 4  | 0 | 11 | 67  | 62  | 104 | 172 | 34 | 186 | 0  |  |  |  |  |  |  |  |
| 51.80 | 58 | 0  | 0 | 37 | 64  | 63  | 57  | 76  | 28 | 183 | 0  |  |  |  |  |  |  |  |
| 51.91 | 38 | 0  | 0 | 0  | 61  | 54  | 0   | 175 | 19 | 195 | 0  |  |  |  |  |  |  |  |
| 52.01 | 37 | 13 | 0 | 0  | 49  | 36  | 8   | 173 | 37 | 150 | 4  |  |  |  |  |  |  |  |
| 52.11 | 26 | 0  | 0 | 21 | 83  | 76  | 34  | 60  | 34 | 423 | 5  |  |  |  |  |  |  |  |
| 52.21 | 31 | 0  | 0 | 0  | 91  | 62  | 0   | 51  | 50 | 373 | 17 |  |  |  |  |  |  |  |
| 52.31 | 17 | 0  | 0 | 0  | 102 | 60  | 0   | 39  | 29 | 224 | 0  |  |  |  |  |  |  |  |
| 52.41 | 15 | 0  | 0 | 0  | 74  | 62  | 22  | 0   | 53 | 347 | 0  |  |  |  |  |  |  |  |
| 52.51 | 50 | 0  | 0 | 7  | 115 | 48  | 35  | 0   | 29 | 391 | 0  |  |  |  |  |  |  |  |
| 52.60 | 36 | 0  | 0 | 0  | 51  | 70  | 72  | 39  | 55 | 203 | 10 |  |  |  |  |  |  |  |
| 52.71 | 35 | 0  | 0 | 10 | 49  | 79  | 83  | 41  | 51 | 221 | 0  |  |  |  |  |  |  |  |
| 52.80 | 19 | 0  | 0 | 8  | 75  | 83  | 36  | 0   | 23 | 36  | 0  |  |  |  |  |  |  |  |
| 52.90 | 25 | 0  | 5 | 0  | 112 | 81  | 73  | 0   | 20 | 261 | 19 |  |  |  |  |  |  |  |
| 53.01 | 37 | 0  | 0 | 22 | 140 | 33  | 140 | 38  | 54 | 443 | 0  |  |  |  |  |  |  |  |
| 53.10 | 42 | 0  | 0 | 0  | 90  | 0   | 63  | 34  | 64 | 329 | 19 |  |  |  |  |  |  |  |
| 53.21 | 34 | 0  | 0 | 5  | 98  | 44  | 48  | 122 | 56 | 111 | 0  |  |  |  |  |  |  |  |
| 53.31 | 37 | 11 | 0 | 40 | 56  | 28  | 0   | 94  | 44 | 29  | 25 |  |  |  |  |  |  |  |
| 53.40 | 25 | 0  | 0 | 0  | 69  | 36  | 32  | 91  | 57 | 194 | 0  |  |  |  |  |  |  |  |
| 53.51 | 13 | 0  | 0 | 25 | 51  | 63  | 53  | 60  | 11 | 438 | 8  |  |  |  |  |  |  |  |
| 53.60 | 31 | 0  | 0 | 13 | 48  | 79  | 89  | 39  | 23 | 482 | 7  |  |  |  |  |  |  |  |
| 53.70 | 27 | 0  | 0 | 27 | 81  | 21  | 0   | 15  | 39 | 312 | 7  |  |  |  |  |  |  |  |
| 53.81 | 45 | 0  | 0 | 0  | 86  | 37  | 41  | 50  | 39 | 435 | 8  |  |  |  |  |  |  |  |
| 53.90 | 28 | 0  | 0 | 0  | 91  | 60  | 103 | 79  | 44 | 494 | 7  |  |  |  |  |  |  |  |

|       |    |    |   |    |     |     |     |     |    |     |    |  |  |  |  |  |  |  |
|-------|----|----|---|----|-----|-----|-----|-----|----|-----|----|--|--|--|--|--|--|--|
| 54.00 | 46 | 0  | 0 | 0  | 72  | 79  | 76  | 108 | 28 | 292 | 8  |  |  |  |  |  |  |  |
| 54.10 | 34 | 0  | 0 | 32 | 83  | 54  | 35  | 68  | 43 | 303 | 0  |  |  |  |  |  |  |  |
| 54.20 | 43 | 0  | 0 | 23 | 91  | 61  | 39  | 17  | 39 | 364 | 18 |  |  |  |  |  |  |  |
| 54.31 | 32 | 0  | 0 | 0  | 126 | 58  | 75  | 0   | 36 | 314 | 9  |  |  |  |  |  |  |  |
| 54.41 | 36 | 0  | 0 | 25 | 71  | 73  | 33  | 9   | 7  | 146 | 0  |  |  |  |  |  |  |  |
| 54.50 | 16 | 0  | 0 | 0  | 46  | 37  | 90  | 97  | 50 | 334 | 0  |  |  |  |  |  |  |  |
| 54.61 | 44 | 0  | 0 | 16 | 81  | 57  | 110 | 72  | 41 | 208 | 0  |  |  |  |  |  |  |  |
| 54.70 | 51 | 0  | 4 | 48 | 117 | 49  | 75  | 275 | 42 | 115 | 11 |  |  |  |  |  |  |  |
| 54.81 | 22 | 0  | 0 | 0  | 83  | 68  | 42  | 626 | 44 | 50  | 0  |  |  |  |  |  |  |  |
| 54.91 | 41 | 0  | 0 | 0  | 82  | 23  | 38  | 712 | 35 | 30  | 0  |  |  |  |  |  |  |  |
| 55.00 | 13 | 0  | 0 | 33 | 71  | 23  | 4   | 290 | 23 | 233 | 0  |  |  |  |  |  |  |  |
| 55.10 | 24 | 0  | 0 | 21 | 90  | 87  | 0   | 0   | 42 | 424 | 0  |  |  |  |  |  |  |  |
| 55.20 | 37 | 0  | 0 | 0  | 80  | 44  | 83  | 20  | 32 | 301 | 0  |  |  |  |  |  |  |  |
| 55.31 | 48 | 0  | 0 | 30 | 70  | 26  | 0   | 20  | 26 | 336 | 7  |  |  |  |  |  |  |  |
| 55.41 | 25 | 0  | 0 | 42 | 83  | 46  | 83  | 0   | 22 | 323 | 0  |  |  |  |  |  |  |  |
| 55.50 | 28 | 0  | 0 | 38 | 63  | 71  | 5   | 124 | 21 | 277 | 13 |  |  |  |  |  |  |  |
| 55.61 | 51 | 0  | 0 | 6  | 95  | 60  | 75  | 0   | 53 | 127 | 8  |  |  |  |  |  |  |  |
| 55.71 | 42 | 0  | 4 | 0  | 47  | 34  | 58  | 89  | 42 | 104 | 6  |  |  |  |  |  |  |  |
| 55.80 | 32 | 9  | 0 | 14 | 81  | 31  | 135 | 66  | 20 | 61  | 0  |  |  |  |  |  |  |  |
| 55.91 | 40 | 0  | 0 | 19 | 84  | 75  | 51  | 122 | 37 | 215 | 16 |  |  |  |  |  |  |  |
| 56.01 | 45 | 0  | 0 | 0  | 92  | 83  | 135 | 74  | 41 | 211 | 0  |  |  |  |  |  |  |  |
| 56.11 | 36 | 0  | 0 | 0  | 91  | 13  | 37  | 92  | 22 | 221 | 0  |  |  |  |  |  |  |  |
| 56.21 | 31 | 0  | 0 | 26 | 64  | 52  | 0   | 16  | 46 | 242 | 0  |  |  |  |  |  |  |  |
| 56.30 | 40 | 0  | 0 | 0  | 59  | 77  | 78  | 107 | 17 | 411 | 6  |  |  |  |  |  |  |  |
| 56.41 | 53 | 0  | 0 | 6  | 69  | 51  | 0   | 60  | 43 | 328 | 0  |  |  |  |  |  |  |  |
| 56.51 | 34 | 0  | 0 | 16 | 62  | 90  | 112 | 0   | 51 | 361 | 20 |  |  |  |  |  |  |  |
| 56.60 | 24 | 0  | 0 | 0  | 46  | 90  | 94  | 0   | 33 | 450 | 19 |  |  |  |  |  |  |  |
| 56.71 | 38 | 0  | 0 | 0  | 77  | 86  | 12  | 0   | 32 | 290 | 0  |  |  |  |  |  |  |  |
| 56.81 | 42 | 0  | 0 | 29 | 52  | 44  | 99  | 77  | 35 | 268 | 19 |  |  |  |  |  |  |  |
| 56.90 | 50 | 0  | 0 | 30 | 107 | 55  | 87  | 4   | 48 | 295 | 17 |  |  |  |  |  |  |  |
| 57.00 | 39 | 0  | 0 | 14 | 85  | 67  | 103 | 98  | 23 | 173 | 9  |  |  |  |  |  |  |  |
| 57.11 | 6  | 0  | 0 | 19 | 66  | 76  | 152 | 166 | 41 | 120 | 0  |  |  |  |  |  |  |  |
| 57.21 | 34 | 5  | 0 | 38 | 87  | 94  | 127 | 266 | 45 | 134 | 0  |  |  |  |  |  |  |  |
| 57.31 | 63 | 0  | 0 | 33 | 85  | 62  | 119 | 52  | 33 | 0   | 0  |  |  |  |  |  |  |  |
| 57.41 | 56 | 0  | 0 | 0  | 50  | 9   | 33  | 58  | 28 | 346 | 28 |  |  |  |  |  |  |  |
| 57.51 | 61 | 0  | 0 | 30 | 33  | 75  | 12  | 82  | 48 | 58  | 14 |  |  |  |  |  |  |  |
| 57.61 | 21 | 6  | 0 | 11 | 70  | 80  | 64  | 63  | 0  | 334 | 23 |  |  |  |  |  |  |  |
| 57.70 | 37 | 0  | 0 | 0  | 86  | 36  | 39  | 81  | 22 | 282 | 0  |  |  |  |  |  |  |  |
| 57.81 | 28 | 0  | 0 | 0  | 134 | 52  | 7   | 34  | 32 | 568 | 25 |  |  |  |  |  |  |  |
| 57.91 | 47 | 5  | 0 | 0  | 94  | 66  | 104 | 65  | 41 | 325 | 0  |  |  |  |  |  |  |  |
| 58.00 | 26 | 0  | 0 | 27 | 96  | 65  | 138 | 71  | 31 | 393 | 7  |  |  |  |  |  |  |  |
| 58.11 | 27 | 0  | 0 | 24 | 68  | 78  | 82  | 110 | 29 | 197 | 11 |  |  |  |  |  |  |  |
| 58.20 | 42 | 0  | 0 | 0  | 69  | 41  | 0   | 0   | 28 | 229 | 0  |  |  |  |  |  |  |  |
| 58.31 | 48 | 0  | 0 | 15 | 75  | 68  | 69  | 61  | 22 | 216 | 18 |  |  |  |  |  |  |  |
| 58.40 | 28 | 0  | 0 | 21 | 71  | 72  | 94  | 78  | 57 | 471 | 0  |  |  |  |  |  |  |  |
| 58.50 | 36 | 0  | 0 | 51 | 68  | 80  | 86  | 0   | 58 | 265 | 14 |  |  |  |  |  |  |  |
| 58.61 | 24 | 0  | 0 | 30 | 133 | 10  | 95  | 33  | 61 | 212 | 0  |  |  |  |  |  |  |  |
| 58.71 | 32 | 0  | 0 | 7  | 101 | 78  | 0   | 115 | 37 | 67  | 6  |  |  |  |  |  |  |  |
| 58.81 | 26 | 0  | 0 | 59 | 55  | 48  | 83  | 0   | 27 | 166 | 11 |  |  |  |  |  |  |  |
| 58.91 | 48 | 20 | 0 | 0  | 86  | 48  | 45  | 24  | 71 | 374 | 0  |  |  |  |  |  |  |  |
| 59.00 | 45 | 0  | 0 | 7  | 75  | 0   | 18  | 72  | 32 | 258 | 13 |  |  |  |  |  |  |  |
| 59.11 | 32 | 0  | 0 | 0  | 85  | 56  | 13  | 53  | 64 | 256 | 11 |  |  |  |  |  |  |  |
| 59.21 | 32 | 0  | 0 | 24 | 71  | 84  | 34  | 0   | 39 | 362 | 0  |  |  |  |  |  |  |  |
| 59.30 | 41 | 0  | 0 | 0  | 74  | 70  | 0   | 40  | 36 | 308 | 10 |  |  |  |  |  |  |  |
| 59.41 | 28 | 0  | 0 | 15 | 86  | 35  | 28  | 0   | 46 | 424 | 0  |  |  |  |  |  |  |  |
| 59.50 | 58 | 0  | 0 | 37 | 49  | 101 | 45  | 11  | 43 | 383 | 0  |  |  |  |  |  |  |  |
| 59.61 | 40 | 0  | 0 | 16 | 63  | 55  | 54  | 119 | 56 | 345 | 15 |  |  |  |  |  |  |  |
| 59.71 | 20 | 0  | 0 | 0  | 117 | 84  | 77  | 31  | 33 | 280 | 20 |  |  |  |  |  |  |  |

|       |    |    |   |    |     |     |     |     |    |     |    |  |  |  |  |  |  |  |
|-------|----|----|---|----|-----|-----|-----|-----|----|-----|----|--|--|--|--|--|--|--|
| 59.81 | 9  | 0  | 0 | 20 | 78  | 70  | 0   | 38  | 50 | 400 | 0  |  |  |  |  |  |  |  |
| 59.91 | 34 | 0  | 0 | 0  | 79  | 27  | 90  | 10  | 46 | 124 | 0  |  |  |  |  |  |  |  |
| 60.01 | 22 | 10 | 5 | 0  | 76  | 80  | 85  | 124 | 52 | 261 | 24 |  |  |  |  |  |  |  |
| 60.11 | 36 | 0  | 0 | 6  | 79  | 69  | 143 | 145 | 43 | 105 | 26 |  |  |  |  |  |  |  |
| 60.20 | 38 | 18 | 0 | 44 | 55  | 50  | 32  | 108 | 63 | 49  | 8  |  |  |  |  |  |  |  |
| 60.31 | 28 | 0  | 0 | 0  | 59  | 12  | 0   | 96  | 49 | 128 | 7  |  |  |  |  |  |  |  |
| 60.41 | 59 | 9  | 0 | 5  | 71  | 53  | 24  | 119 | 26 | 153 | 20 |  |  |  |  |  |  |  |
| 60.50 | 32 | 0  | 0 | 19 | 69  | 72  | 96  | 158 | 0  | 242 | 0  |  |  |  |  |  |  |  |
| 60.61 | 37 | 0  | 0 | 0  | 74  | 93  | 0   | 73  | 44 | 177 | 18 |  |  |  |  |  |  |  |
| 60.70 | 41 | 0  | 0 | 0  | 104 | 11  | 17  | 59  | 36 | 103 | 7  |  |  |  |  |  |  |  |
| 60.80 | 41 | 0  | 0 | 17 | 85  | 109 | 144 | 101 | 29 | 129 | 5  |  |  |  |  |  |  |  |
| 60.91 | 44 | 0  | 0 | 0  | 71  | 82  | 60  | 62  | 36 | 249 | 0  |  |  |  |  |  |  |  |
| 61.01 | 42 | 0  | 0 | 16 | 104 | 30  | 21  | 45  | 26 | 414 | 0  |  |  |  |  |  |  |  |
| 61.11 | 22 | 0  | 0 | 0  | 86  | 92  | 132 | 146 | 21 | 341 | 0  |  |  |  |  |  |  |  |
| 61.21 | 13 | 0  | 0 | 0  | 65  | 104 | 0   | 33  | 21 | 522 | 6  |  |  |  |  |  |  |  |
| 61.30 | 38 | 0  | 0 | 17 | 61  | 86  | 37  | 118 | 39 | 466 | 0  |  |  |  |  |  |  |  |
| 61.41 | 37 | 0  | 0 | 14 | 52  | 71  | 69  | 49  | 55 | 219 | 29 |  |  |  |  |  |  |  |
| 61.51 | 37 | 0  | 0 | 25 | 91  | 122 | 55  | 53  | 68 | 221 | 19 |  |  |  |  |  |  |  |
| 61.61 | 0  | 0  | 0 | 5  | 102 | 50  | 0   | 86  | 68 | 249 | 0  |  |  |  |  |  |  |  |
| 61.71 | 25 | 0  | 0 | 0  | 115 | 38  | 81  | 98  | 29 | 254 | 15 |  |  |  |  |  |  |  |
| 61.80 | 41 | 0  | 0 | 19 | 89  | 84  | 76  | 0   | 39 | 177 | 0  |  |  |  |  |  |  |  |
| 61.91 | 58 | 0  | 0 | 15 | 91  | 33  | 46  | 93  | 49 | 294 | 0  |  |  |  |  |  |  |  |
| 62.00 | 52 | 0  | 0 | 7  | 108 | 55  | 0   | 66  | 40 | 469 | 35 |  |  |  |  |  |  |  |
| 62.11 | 35 | 0  | 0 | 33 | 106 | 57  | 49  | 150 | 48 | 140 | 0  |  |  |  |  |  |  |  |
| 62.21 | 41 | 0  | 0 | 50 | 94  | 56  | 53  | 105 | 53 | 155 | 15 |  |  |  |  |  |  |  |
| 62.30 | 56 | 6  | 0 | 24 | 68  | 22  | 173 | 148 | 43 | 98  | 7  |  |  |  |  |  |  |  |
| 62.41 | 39 | 0  | 0 | 12 | 59  | 0   | 63  | 119 | 37 | 229 | 23 |  |  |  |  |  |  |  |
| 62.51 | 28 | 0  | 0 | 25 | 94  | 13  | 60  | 185 | 48 | 98  | 26 |  |  |  |  |  |  |  |
| 62.60 | 56 | 0  | 0 | 17 | 95  | 39  | 131 | 113 | 39 | 315 | 7  |  |  |  |  |  |  |  |
| 62.71 | 51 | 0  | 0 | 41 | 120 | 22  | 71  | 135 | 38 | 144 | 11 |  |  |  |  |  |  |  |
| 62.80 | 14 | 0  | 0 | 4  | 69  | 41  | 0   | 157 | 35 | 177 | 0  |  |  |  |  |  |  |  |
| 62.91 | 35 | 0  | 0 | 6  | 78  | 26  | 79  | 141 | 49 | 0   | 23 |  |  |  |  |  |  |  |
| 63.01 | 23 | 9  | 0 | 0  | 78  | 88  | 55  | 127 | 54 | 143 | 0  |  |  |  |  |  |  |  |
| 63.11 | 77 | 0  | 0 | 0  | 70  | 24  | 68  | 55  | 70 | 341 | 16 |  |  |  |  |  |  |  |
| 63.21 | 19 | 5  | 0 | 35 | 65  | 54  | 15  | 58  | 27 | 297 | 15 |  |  |  |  |  |  |  |
| 63.30 | 53 | 0  | 0 | 43 | 63  | 59  | 67  | 137 | 27 | 470 | 0  |  |  |  |  |  |  |  |
| 63.41 | 48 | 0  | 0 | 0  | 75  | 14  | 94  | 131 | 25 | 104 | 0  |  |  |  |  |  |  |  |
| 63.51 | 44 | 22 | 0 | 0  | 84  | 29  | 70  | 37  | 43 | 310 | 22 |  |  |  |  |  |  |  |
| 63.61 | 46 | 0  | 0 | 38 | 97  | 107 | 0   | 25  | 39 | 326 | 13 |  |  |  |  |  |  |  |
| 63.71 | 40 | 0  | 0 | 0  | 52  | 69  | 0   | 69  | 45 | 357 | 9  |  |  |  |  |  |  |  |
| 63.81 | 35 | 5  | 0 | 21 | 76  | 48  | 124 | 41  | 42 | 250 | 17 |  |  |  |  |  |  |  |
| 63.90 | 41 | 0  | 0 | 24 | 61  | 65  | 120 | 14  | 44 | 219 | 8  |  |  |  |  |  |  |  |
| 64.01 | 33 | 0  | 0 | 23 | 62  | 46  | 111 | 30  | 44 | 310 | 0  |  |  |  |  |  |  |  |
| 64.11 | 44 | 0  | 0 | 25 | 109 | 66  | 35  | 107 | 16 | 334 | 9  |  |  |  |  |  |  |  |
| 64.21 | 37 | 0  | 0 | 60 | 81  | 72  | 0   | 43  | 48 | 102 | 4  |  |  |  |  |  |  |  |
| 64.31 | 53 | 7  | 0 | 15 | 41  | 63  | 0   | 23  | 47 | 282 | 19 |  |  |  |  |  |  |  |
| 64.40 | 15 | 0  | 0 | 6  | 32  | 48  | 17  | 63  | 19 | 373 | 20 |  |  |  |  |  |  |  |
| 64.50 | 40 | 0  | 0 | 25 | 70  | 102 | 85  | 188 | 54 | 308 | 37 |  |  |  |  |  |  |  |
| 64.61 | 51 | 0  | 0 | 11 | 91  | 97  | 146 | 193 | 57 | 145 | 5  |  |  |  |  |  |  |  |
| 64.70 | 39 | 0  | 0 | 15 | 48  | 52  | 34  | 247 | 38 | 108 | 0  |  |  |  |  |  |  |  |
| 64.80 | 20 | 0  | 0 | 31 | 61  | 35  | 60  | 151 | 56 | 91  | 6  |  |  |  |  |  |  |  |
| 64.91 | 31 | 0  | 0 | 6  | 75  | 48  | 185 | 242 | 51 | 189 | 15 |  |  |  |  |  |  |  |
| 65.01 | 24 | 0  | 0 | 0  | 40  | 22  | 96  | 149 | 38 | 206 | 0  |  |  |  |  |  |  |  |
| 65.10 | 39 | 0  | 0 | 35 | 77  | 56  | 44  | 17  | 39 | 287 | 23 |  |  |  |  |  |  |  |
| 65.21 | 40 | 0  | 0 | 0  | 75  | 33  | 83  | 40  | 66 | 299 | 0  |  |  |  |  |  |  |  |
| 65.30 | 34 | 0  | 0 | 18 | 91  | 184 | 115 | 162 | 42 | 340 | 10 |  |  |  |  |  |  |  |
| 65.40 | 44 | 0  | 0 | 0  | 117 | 111 | 67  | 74  | 49 | 500 | 0  |  |  |  |  |  |  |  |
| 65.51 | 53 | 0  | 0 | 13 | 88  | 80  | 10  | 78  | 62 | 112 | 17 |  |  |  |  |  |  |  |

|       |    |    |    |    |     |     |     |     |     |     |    |  |  |  |  |  |  |  |
|-------|----|----|----|----|-----|-----|-----|-----|-----|-----|----|--|--|--|--|--|--|--|
| 65.61 | 33 | 0  | 0  | 0  | 108 | 64  | 121 | 16  | 59  | 151 | 11 |  |  |  |  |  |  |  |
| 65.71 | 48 | 6  | 0  | 27 | 80  | 70  | 26  | 79  | 65  | 283 | 0  |  |  |  |  |  |  |  |
| 65.81 | 40 | 5  | 0  | 41 | 76  | 115 | 11  | 58  | 61  | 253 | 24 |  |  |  |  |  |  |  |
| 65.90 | 22 | 0  | 0  | 20 | 66  | 73  | 0   | 55  | 41  | 111 | 0  |  |  |  |  |  |  |  |
| 66.01 | 61 | 0  | 0  | 22 | 86  | 57  | 65  | 79  | 46  | 298 | 10 |  |  |  |  |  |  |  |
| 66.10 | 27 | 12 | 0  | 32 | 99  | 57  | 23  | 8   | 37  | 294 | 0  |  |  |  |  |  |  |  |
| 66.20 | 36 | 0  | 0  | 32 | 55  | 93  | 80  | 0   | 66  | 453 | 20 |  |  |  |  |  |  |  |
| 66.31 | 43 | 0  | 0  | 6  | 56  | 0   | 54  | 106 | 71  | 348 | 5  |  |  |  |  |  |  |  |
| 66.40 | 41 | 0  | 0  | 4  | 63  | 111 | 9   | 21  | 52  | 188 | 5  |  |  |  |  |  |  |  |
| 66.50 | 29 | 0  | 0  | 0  | 49  | 114 | 35  | 43  | 76  | 231 | 16 |  |  |  |  |  |  |  |
| 66.61 | 42 | 19 | 0  | 5  | 78  | 51  | 54  | 25  | 74  | 208 | 37 |  |  |  |  |  |  |  |
| 66.70 | 55 | 0  | 0  | 21 | 53  | 54  | 110 | 0   | 45  | 341 | 0  |  |  |  |  |  |  |  |
| 66.81 | 50 | 0  | 0  | 22 | 53  | 50  | 62  | 133 | 42  | 441 | 0  |  |  |  |  |  |  |  |
| 66.91 | 64 | 0  | 0  | 24 | 76  | 68  | 81  | 175 | 63  | 221 | 6  |  |  |  |  |  |  |  |
| 67.00 | 27 | 0  | 0  | 0  | 121 | 62  | 27  | 91  | 87  | 114 | 16 |  |  |  |  |  |  |  |
| 67.11 | 34 | 8  | 0  | 11 | 62  | 76  | 52  | 113 | 34  | 367 | 31 |  |  |  |  |  |  |  |
| 67.21 | 45 | 0  | 0  | 0  | 43  | 59  | 89  | 148 | 63  | 197 | 12 |  |  |  |  |  |  |  |
| 67.31 | 64 | 0  | 0  | 21 | 55  | 27  | 50  | 143 | 66  | 185 | 5  |  |  |  |  |  |  |  |
| 67.41 | 26 | 5  | 0  | 31 | 84  | 33  | 109 | 138 | 96  | 19  | 6  |  |  |  |  |  |  |  |
| 67.50 | 50 | 5  | 0  | 17 | 90  | 54  | 95  | 169 | 87  | 109 | 11 |  |  |  |  |  |  |  |
| 67.61 | 37 | 0  | 0  | 0  | 70  | 67  | 61  | 99  | 64  | 197 | 0  |  |  |  |  |  |  |  |
| 67.71 | 57 | 0  | 0  | 24 | 62  | 108 | 8   | 134 | 84  | 146 | 13 |  |  |  |  |  |  |  |
| 67.80 | 24 | 0  | 28 | 10 | 74  | 78  | 88  | 87  | 101 | 245 | 19 |  |  |  |  |  |  |  |
| 67.91 | 30 | 11 | 0  | 0  | 50  | 78  | 0   | 103 | 75  | 176 | 0  |  |  |  |  |  |  |  |
| 68.01 | 25 | 0  | 0  | 0  | 66  | 85  | 76  | 80  | 65  | 344 | 0  |  |  |  |  |  |  |  |
| 68.11 | 56 | 0  | 0  | 33 | 108 | 84  | 66  | 73  | 54  | 141 | 20 |  |  |  |  |  |  |  |
| 68.20 | 32 | 0  | 0  | 41 | 107 | 83  | 50  | 135 | 35  | 466 | 0  |  |  |  |  |  |  |  |
| 68.30 | 25 | 0  | 0  | 34 | 67  | 63  | 0   | 44  | 43  | 238 | 0  |  |  |  |  |  |  |  |
| 68.41 | 30 | 0  | 0  | 0  | 71  | 65  | 36  | 56  | 26  | 276 | 20 |  |  |  |  |  |  |  |
| 68.51 | 23 | 0  | 0  | 11 | 86  | 106 | 35  | 65  | 74  | 382 | 14 |  |  |  |  |  |  |  |
| 68.60 | 64 | 0  | 0  | 0  | 80  | 70  | 86  | 0   | 42  | 359 | 16 |  |  |  |  |  |  |  |
| 68.71 | 30 | 0  | 0  | 0  | 91  | 104 | 13  | 66  | 58  | 181 | 7  |  |  |  |  |  |  |  |
| 68.80 | 50 | 0  | 0  | 41 | 97  | 80  | 9   | 62  | 54  | 421 | 23 |  |  |  |  |  |  |  |
| 68.91 | 28 | 0  | 0  | 0  | 74  | 69  | 104 | 0   | 60  | 322 | 34 |  |  |  |  |  |  |  |
| 69.01 | 32 | 0  | 0  | 11 | 110 | 61  | 81  | 35  | 113 | 217 | 25 |  |  |  |  |  |  |  |
| 69.10 | 48 | 0  | 0  | 25 | 65  | 110 | 57  | 31  | 64  | 324 | 13 |  |  |  |  |  |  |  |
| 69.21 | 36 | 5  | 0  | 0  | 91  | 110 | 74  | 64  | 59  | 392 | 7  |  |  |  |  |  |  |  |
| 69.30 | 9  | 0  | 0  | 0  | 58  | 98  | 90  | 48  | 56  | 409 | 0  |  |  |  |  |  |  |  |
| 69.40 | 20 | 0  | 0  | 0  | 121 | 44  | 15  | 108 | 72  | 335 | 15 |  |  |  |  |  |  |  |
| 69.50 | 36 | 0  | 0  | 0  | 65  | 114 | 9   | 87  | 67  | 453 | 12 |  |  |  |  |  |  |  |
| 69.60 | 14 | 0  | 0  | 33 | 102 | 137 | 36  | 61  | 82  | 325 | 9  |  |  |  |  |  |  |  |
| 69.71 | 30 | 0  | 0  | 29 | 75  | 167 | 64  | 188 | 87  | 448 | 20 |  |  |  |  |  |  |  |
| 69.80 | 37 | 0  | 0  | 0  | 107 | 120 | 37  | 125 | 70  | 366 | 7  |  |  |  |  |  |  |  |
| 69.91 | 49 | 0  | 0  | 0  | 74  | 106 | 65  | 53  | 34  | 368 | 0  |  |  |  |  |  |  |  |
| 70.01 | 62 | 0  | 0  | 25 | 61  | 44  | 107 | 183 | 72  | 377 | 33 |  |  |  |  |  |  |  |
| 70.11 | 52 | 0  | 0  | 18 | 85  | 110 | 85  | 157 | 66  | 256 | 40 |  |  |  |  |  |  |  |
| 70.20 | 17 | 5  | 0  | 23 | 93  | 100 | 55  | 72  | 94  | 292 | 10 |  |  |  |  |  |  |  |
| 70.30 | 32 | 0  | 0  | 21 | 89  | 61  | 66  | 79  | 63  | 207 | 25 |  |  |  |  |  |  |  |
| 70.41 | 24 | 0  | 0  | 24 | 101 | 100 | 85  | 36  | 109 | 447 | 40 |  |  |  |  |  |  |  |
| 70.51 | 25 | 0  | 0  | 0  | 64  | 109 | 123 | 51  | 69  | 460 | 0  |  |  |  |  |  |  |  |
| 70.61 | 38 | 0  | 0  | 12 | 79  | 97  | 102 | 145 | 50  | 463 | 9  |  |  |  |  |  |  |  |
| 70.71 | 50 | 0  | 0  | 28 | 58  | 41  | 141 | 91  | 54  | 358 | 13 |  |  |  |  |  |  |  |
| 70.80 | 33 | 0  | 0  | 0  | 77  | 67  | 81  | 121 | 54  | 295 | 13 |  |  |  |  |  |  |  |
| 70.91 | 43 | 9  | 0  | 14 | 78  | 86  | 140 | 168 | 83  | 116 | 18 |  |  |  |  |  |  |  |
| 71.01 | 56 | 0  | 0  | 15 | 61  | 40  | 166 | 176 | 55  | 216 | 0  |  |  |  |  |  |  |  |
| 71.10 | 31 | 0  | 0  | 0  | 23  | 51  | 53  | 116 | 45  | 198 | 9  |  |  |  |  |  |  |  |
| 71.21 | 13 | 0  | 0  | 17 | 35  | 118 | 10  | 103 | 66  | 273 | 33 |  |  |  |  |  |  |  |
| 71.30 | 21 | 0  | 0  | 29 | 70  | 58  | 42  | 79  | 47  | 312 | 18 |  |  |  |  |  |  |  |

|       |    |    |   |    |     |     |     |     |    |     |    |  |  |  |  |  |  |  |
|-------|----|----|---|----|-----|-----|-----|-----|----|-----|----|--|--|--|--|--|--|--|
| 71.41 | 32 | 0  | 0 | 19 | 88  | 10  | 0   | 107 | 33 | 293 | 15 |  |  |  |  |  |  |  |
| 71.51 | 38 | 0  | 0 | 18 | 83  | 62  | 50  | 82  | 40 | 278 | 0  |  |  |  |  |  |  |  |
| 71.60 | 33 | 0  | 0 | 22 | 73  | 88  | 31  | 94  | 46 | 395 | 0  |  |  |  |  |  |  |  |
| 71.71 | 17 | 0  | 0 | 0  | 57  | 107 | 92  | 149 | 58 | 201 | 12 |  |  |  |  |  |  |  |
| 71.81 | 38 | 21 | 0 | 0  | 73  | 94  | 0   | 73  | 73 | 206 | 18 |  |  |  |  |  |  |  |
| 71.90 | 62 | 0  | 0 | 0  | 58  | 64  | 0   | 105 | 41 | 275 | 0  |  |  |  |  |  |  |  |
| 72.01 | 58 | 0  | 0 | 33 | 58  | 57  | 0   | 32  | 60 | 263 | 13 |  |  |  |  |  |  |  |
| 72.10 | 50 | 0  | 0 | 28 | 46  | 64  | 27  | 0   | 35 | 327 | 17 |  |  |  |  |  |  |  |
| 72.21 | 28 | 0  | 5 | 8  | 116 | 138 | 60  | 62  | 62 | 388 | 16 |  |  |  |  |  |  |  |
| 72.30 | 29 | 0  | 0 | 0  | 108 | 63  | 143 | 25  | 78 | 526 | 38 |  |  |  |  |  |  |  |
| 72.41 | 70 | 0  | 0 | 8  | 55  | 58  | 45  | 144 | 58 | 284 | 8  |  |  |  |  |  |  |  |
| 72.51 | 35 | 0  | 0 | 21 | 83  | 77  | 20  | 138 | 41 | 75  | 21 |  |  |  |  |  |  |  |
| 72.60 | 29 | 6  | 0 | 47 | 73  | 63  | 42  | 86  | 53 | 503 | 18 |  |  |  |  |  |  |  |
| 72.71 | 51 | 0  | 0 | 6  | 139 | 67  | 17  | 39  | 46 | 278 | 11 |  |  |  |  |  |  |  |
| 72.81 | 23 | 0  | 0 | 12 | 60  | 59  | 89  | 109 | 34 | 411 | 0  |  |  |  |  |  |  |  |
| 72.91 | 0  | 0  | 0 | 20 | 87  | 120 | 82  | 24  | 55 | 371 | 0  |  |  |  |  |  |  |  |
| 73.01 | 30 | 0  | 0 | 20 | 27  | 96  | 10  | 65  | 36 | 357 | 0  |  |  |  |  |  |  |  |
| 73.11 | 79 | 0  | 0 | 0  | 76  | 49  | 0   | 0   | 49 | 521 | 14 |  |  |  |  |  |  |  |
| 73.21 | 56 | 0  | 0 | 0  | 87  | 31  | 63  | 118 | 43 | 338 | 0  |  |  |  |  |  |  |  |
| 73.30 | 41 | 0  | 0 | 5  | 71  | 76  | 18  | 51  | 44 | 388 | 0  |  |  |  |  |  |  |  |
| 73.40 | 30 | 0  | 0 | 0  | 49  | 83  | 150 | 11  | 52 | 286 | 13 |  |  |  |  |  |  |  |
| 73.51 | 33 | 0  | 0 | 12 | 110 | 59  | 69  | 114 | 42 | 344 | 13 |  |  |  |  |  |  |  |
| 73.61 | 60 | 11 | 0 | 0  | 83  | 84  | 74  | 52  | 62 | 426 | 0  |  |  |  |  |  |  |  |
| 73.70 | 15 | 0  | 0 | 9  | 28  | 70  | 63  | 137 | 65 | 420 | 0  |  |  |  |  |  |  |  |
| 73.81 | 35 | 0  | 0 | 38 | 69  | 115 | 0   | 35  | 31 | 425 | 0  |  |  |  |  |  |  |  |
| 73.90 | 33 | 0  | 0 | 0  | 42  | 76  | 38  | 6   | 82 | 359 | 27 |  |  |  |  |  |  |  |
| 74.01 | 33 | 0  | 0 | 7  | 49  | 27  | 94  | 123 | 42 | 327 | 14 |  |  |  |  |  |  |  |
| 74.11 | 39 | 0  | 0 | 21 | 71  | 60  | 33  | 126 | 37 | 215 | 7  |  |  |  |  |  |  |  |
| 74.21 | 48 | 0  | 0 | 0  | 75  | 86  | 183 | 154 | 44 | 269 | 0  |  |  |  |  |  |  |  |
| 74.31 | 34 | 0  | 0 | 0  | 61  | 60  | 136 | 88  | 41 | 217 | 9  |  |  |  |  |  |  |  |
| 74.40 | 40 | 0  | 0 | 0  | 106 | 93  | 125 | 121 | 62 | 324 | 9  |  |  |  |  |  |  |  |
| 74.50 | 43 | 0  | 0 | 16 | 104 | 53  | 139 | 178 | 29 | 145 | 0  |  |  |  |  |  |  |  |
| 74.61 | 72 | 0  | 0 | 21 | 85  | 60  | 16  | 119 | 54 | 235 | 7  |  |  |  |  |  |  |  |
| 74.71 | 68 | 0  | 0 | 0  | 74  | 11  | 167 | 53  | 25 | 223 | 0  |  |  |  |  |  |  |  |
| 74.80 | 34 | 0  | 0 | 0  | 78  | 90  | 97  | 22  | 31 | 153 | 8  |  |  |  |  |  |  |  |
| 74.91 | 47 | 0  | 0 | 0  | 80  | 41  | 110 | 5   | 47 | 256 | 0  |  |  |  |  |  |  |  |
| 75.01 | 52 | 0  | 0 | 26 | 84  | 48  | 125 | 82  | 52 | 275 | 0  |  |  |  |  |  |  |  |
| 75.10 | 45 | 0  | 0 | 30 | 38  | 48  | 45  | 41  | 44 | 350 | 21 |  |  |  |  |  |  |  |
| 75.21 | 44 | 9  | 0 | 31 | 106 | 62  | 5   | 42  | 56 | 389 | 10 |  |  |  |  |  |  |  |
| 75.30 | 36 | 0  | 0 | 58 | 61  | 50  | 119 | 131 | 40 | 298 | 0  |  |  |  |  |  |  |  |
| 75.41 | 10 | 0  | 0 | 12 | 68  | 166 | 20  | 0   | 38 | 217 | 6  |  |  |  |  |  |  |  |
| 75.51 | 44 | 0  | 0 | 0  | 52  | 112 | 64  | 89  | 39 | 212 | 8  |  |  |  |  |  |  |  |
| 75.60 | 43 | 20 | 0 | 30 | 58  | 65  | 116 | 6   | 32 | 388 | 38 |  |  |  |  |  |  |  |
| 75.71 | 31 | 0  | 0 | 37 | 88  | 79  | 116 | 121 | 48 | 357 | 19 |  |  |  |  |  |  |  |
| 75.81 | 34 | 0  | 0 | 0  | 42  | 67  | 50  | 76  | 45 | 238 | 27 |  |  |  |  |  |  |  |
| 75.91 | 32 | 0  | 0 | 0  | 116 | 72  | 34  | 40  | 28 | 372 | 5  |  |  |  |  |  |  |  |
| 76.01 | 22 | 0  | 0 | 0  | 46  | 78  | 80  | 0   | 41 | 267 | 11 |  |  |  |  |  |  |  |
| 76.10 | 29 | 0  | 0 | 0  | 70  | 65  | 0   | 121 | 60 | 194 | 10 |  |  |  |  |  |  |  |
| 76.21 | 32 | 0  | 0 | 28 | 59  | 65  | 62  | 73  | 55 | 160 | 0  |  |  |  |  |  |  |  |
| 76.30 | 42 | 0  | 0 | 0  | 54  | 71  | 178 | 17  | 54 | 326 | 0  |  |  |  |  |  |  |  |
| 76.40 | 42 | 0  | 0 | 45 | 91  | 29  | 129 | 91  | 59 | 305 | 0  |  |  |  |  |  |  |  |
| 76.51 | 51 | 0  | 0 | 42 | 62  | 72  | 118 | 72  | 48 | 244 | 0  |  |  |  |  |  |  |  |
| 76.60 | 49 | 0  | 0 | 35 | 51  | 121 | 194 | 53  | 40 | 132 | 0  |  |  |  |  |  |  |  |
| 76.71 | 16 | 0  | 0 | 0  | 66  | 107 | 131 | 58  | 63 | 227 | 0  |  |  |  |  |  |  |  |
| 76.81 | 20 | 0  | 0 | 0  | 87  | 62  | 164 | 104 | 78 | 259 | 25 |  |  |  |  |  |  |  |
| 76.90 | 24 | 0  | 0 | 21 | 65  | 98  | 103 | 84  | 48 | 338 | 0  |  |  |  |  |  |  |  |
| 77.01 | 41 | 0  | 0 | 0  | 109 | 87  | 0   | 18  | 48 | 243 | 15 |  |  |  |  |  |  |  |
| 77.11 | 47 | 0  | 0 | 43 | 66  | 141 | 14  | 114 | 15 | 318 | 11 |  |  |  |  |  |  |  |

|       |    |   |    |    |     |     |     |     |    |     |    |  |  |  |  |  |  |  |
|-------|----|---|----|----|-----|-----|-----|-----|----|-----|----|--|--|--|--|--|--|--|
| 77.21 | 30 | 8 | 0  | 0  | 76  | 39  | 97  | 0   | 47 | 142 | 0  |  |  |  |  |  |  |  |
| 77.31 | 34 | 0 | 0  | 0  | 75  | 76  | 122 | 81  | 40 | 319 | 0  |  |  |  |  |  |  |  |
| 77.41 | 50 | 0 | 0  | 5  | 84  | 76  | 119 | 0   | 55 | 470 | 0  |  |  |  |  |  |  |  |
| 77.51 | 47 | 0 | 0  | 18 | 82  | 67  | 81  | 0   | 43 | 356 | 5  |  |  |  |  |  |  |  |
| 77.61 | 28 | 0 | 0  | 46 | 79  | 62  | 60  | 38  | 46 | 509 | 0  |  |  |  |  |  |  |  |
| 77.70 | 48 | 0 | 0  | 49 | 75  | 81  | 108 | 85  | 56 | 304 | 31 |  |  |  |  |  |  |  |
| 77.81 | 64 | 0 | 0  | 0  | 93  | 84  | 106 | 191 | 40 | 382 | 8  |  |  |  |  |  |  |  |
| 77.91 | 48 | 0 | 0  | 15 | 66  | 113 | 124 | 136 | 75 | 336 | 0  |  |  |  |  |  |  |  |
| 78.01 | 41 | 0 | 0  | 5  | 54  | 80  | 107 | 49  | 48 | 417 | 0  |  |  |  |  |  |  |  |
| 78.11 | 33 | 0 | 0  | 0  | 41  | 92  | 84  | 117 | 70 | 298 | 7  |  |  |  |  |  |  |  |
| 78.21 | 49 | 0 | 0  | 0  | 116 | 63  | 85  | 180 | 60 | 251 | 21 |  |  |  |  |  |  |  |
| 78.31 | 51 | 0 | 0  | 57 | 38  | 79  | 83  | 140 | 39 | 460 | 0  |  |  |  |  |  |  |  |
| 78.41 | 40 | 0 | 0  | 10 | 89  | 58  | 94  | 0   | 64 | 235 | 11 |  |  |  |  |  |  |  |
| 78.51 | 5  | 0 | 0  | 0  | 67  | 110 | 50  | 109 | 41 | 286 | 6  |  |  |  |  |  |  |  |
| 78.61 | 37 | 0 | 0  | 0  | 110 | 56  | 82  | 23  | 40 | 442 | 15 |  |  |  |  |  |  |  |
| 78.71 | 0  | 0 | 0  | 24 | 87  | 63  | 6   | 0   | 69 | 336 | 8  |  |  |  |  |  |  |  |
| 78.81 | 44 | 0 | 5  | 18 | 89  | 65  | 115 | 49  | 47 | 307 | 34 |  |  |  |  |  |  |  |
| 78.91 | 46 | 0 | 0  | 25 | 44  | 100 | 42  | 27  | 48 | 416 | 21 |  |  |  |  |  |  |  |
| 79.00 | 9  | 0 | 0  | 47 | 52  | 77  | 160 | 41  | 50 | 374 | 19 |  |  |  |  |  |  |  |
| 79.11 | 48 | 0 | 0  | 0  | 73  | 127 | 28  | 95  | 76 | 390 | 0  |  |  |  |  |  |  |  |
| 79.20 | 27 | 0 | 0  | 38 | 83  | 112 | 54  | 9   | 63 | 438 | 0  |  |  |  |  |  |  |  |
| 79.31 | 12 | 0 | 0  | 19 | 33  | 80  | 68  | 59  | 72 | 415 | 0  |  |  |  |  |  |  |  |
| 79.41 | 47 | 0 | 0  | 61 | 82  | 111 | 102 | 63  | 48 | 180 | 0  |  |  |  |  |  |  |  |
| 79.50 | 40 | 0 | 0  | 6  | 104 | 66  | 54  | 53  | 50 | 292 | 14 |  |  |  |  |  |  |  |
| 79.61 | 18 | 0 | 0  | 47 | 103 | 89  | 13  | 68  | 48 | 343 | 22 |  |  |  |  |  |  |  |
| 79.71 | 39 | 0 | 0  | 0  | 69  | 47  | 69  | 0   | 61 | 91  | 11 |  |  |  |  |  |  |  |
| 79.81 | 18 | 0 | 0  | 0  | 107 | 95  | 50  | 0   | 52 | 368 | 5  |  |  |  |  |  |  |  |
| 79.91 | 46 | 0 | 0  | 38 | 75  | 115 | 18  | 47  | 44 | 464 | 13 |  |  |  |  |  |  |  |
| 80.01 | 30 | 0 | 0  | 0  | 60  | 83  | 71  | 61  | 59 | 349 | 37 |  |  |  |  |  |  |  |
| 80.11 | 48 | 0 | 0  | 0  | 9   | 16  | 149 | 30  | 49 | 319 | 0  |  |  |  |  |  |  |  |
| 80.21 | 36 | 0 | 0  | 27 | 59  | 78  | 0   | 95  | 49 | 363 | 0  |  |  |  |  |  |  |  |
| 80.31 | 39 | 0 | 0  | 5  | 60  | 61  | 28  | 0   | 49 | 366 | 14 |  |  |  |  |  |  |  |
| 80.40 | 45 | 0 | 0  | 46 | 51  | 50  | 129 | 11  | 57 | 333 | 0  |  |  |  |  |  |  |  |
| 80.50 | 34 | 0 | 0  | 0  | 86  | 62  | 76  | 43  | 84 | 438 | 13 |  |  |  |  |  |  |  |
| 80.61 | 34 | 0 | 0  | 14 | 82  | 86  | 154 | 0   | 49 | 276 | 11 |  |  |  |  |  |  |  |
| 80.70 | 36 | 0 | 0  | 47 | 98  | 81  | 108 | 109 | 51 | 519 | 8  |  |  |  |  |  |  |  |
| 80.81 | 17 | 0 | 0  | 28 | 67  | 39  | 118 | 102 | 57 | 480 | 17 |  |  |  |  |  |  |  |
| 80.91 | 47 | 0 | 0  | 8  | 33  | 35  | 58  | 60  | 49 | 387 | 6  |  |  |  |  |  |  |  |
| 81.00 | 31 | 0 | 0  | 35 | 119 | 80  | 46  | 162 | 41 | 247 | 0  |  |  |  |  |  |  |  |
| 81.11 | 42 | 0 | 0  | 14 | 67  | 31  | 51  | 0   | 40 | 195 | 19 |  |  |  |  |  |  |  |
| 81.21 | 48 | 0 | 0  | 0  | 64  | 106 | 169 | 28  | 52 | 367 | 14 |  |  |  |  |  |  |  |
| 81.31 | 38 | 0 | 0  | 25 | 78  | 82  | 43  | 85  | 95 | 407 | 6  |  |  |  |  |  |  |  |
| 81.40 | 65 | 0 | 11 | 0  | 58  | 72  | 57  | 12  | 45 | 231 | 18 |  |  |  |  |  |  |  |
| 81.50 | 15 | 0 | 0  | 11 | 69  | 75  | 58  | 68  | 31 | 278 | 0  |  |  |  |  |  |  |  |
| 81.60 | 45 | 0 | 0  | 31 | 77  | 32  | 74  | 101 | 57 | 399 | 13 |  |  |  |  |  |  |  |
| 81.71 | 36 | 0 | 0  | 45 | 43  | 78  | 97  | 110 | 58 | 180 | 12 |  |  |  |  |  |  |  |
| 81.80 | 15 | 0 | 6  | 8  | 89  | 85  | 115 | 36  | 51 | 334 | 20 |  |  |  |  |  |  |  |
| 81.90 | 57 | 0 | 0  | 15 | 65  | 98  | 95  | 26  | 35 | 403 | 5  |  |  |  |  |  |  |  |
| 82.00 | 26 | 0 | 0  | 20 | 49  | 109 | 71  | 114 | 77 | 200 | 11 |  |  |  |  |  |  |  |
| 82.11 | 42 | 0 | 0  | 41 | 102 | 95  | 71  | 61  | 26 | 374 | 23 |  |  |  |  |  |  |  |
| 82.21 | 61 | 0 | 0  | 5  | 35  | 18  | 85  | 26  | 53 | 336 | 21 |  |  |  |  |  |  |  |
| 82.31 | 60 | 0 | 0  | 11 | 78  | 52  | 45  | 63  | 75 | 124 | 0  |  |  |  |  |  |  |  |
| 82.40 | 25 | 0 | 0  | 0  | 82  | 56  | 71  | 60  | 61 | 194 | 0  |  |  |  |  |  |  |  |
| 82.51 | 45 | 0 | 0  | 0  | 81  | 69  | 92  | 134 | 45 | 159 | 0  |  |  |  |  |  |  |  |
| 82.61 | 22 | 0 | 0  | 21 | 78  | 127 | 0   | 25  | 49 | 207 | 0  |  |  |  |  |  |  |  |
| 82.70 | 49 | 0 | 0  | 7  | 61  | 79  | 133 | 146 | 53 | 226 | 5  |  |  |  |  |  |  |  |
| 82.81 | 38 | 0 | 0  | 10 | 67  | 131 | 55  | 34  | 57 | 414 | 45 |  |  |  |  |  |  |  |
| 82.91 | 35 | 0 | 0  | 42 | 16  | 96  | 155 | 0   | 48 | 230 | 7  |  |  |  |  |  |  |  |

|       |    |   |   |    |     |     |     |     |     |     |    |  |  |  |  |  |  |  |
|-------|----|---|---|----|-----|-----|-----|-----|-----|-----|----|--|--|--|--|--|--|--|
| 83.01 | 45 | 0 | 0 | 44 | 46  | 48  | 147 | 95  | 18  | 246 | 0  |  |  |  |  |  |  |  |
| 83.10 | 34 | 0 | 0 | 43 | 66  | 91  | 111 | 92  | 47  | 294 | 0  |  |  |  |  |  |  |  |
| 83.20 | 30 | 0 | 0 | 38 | 75  | 45  | 85  | 92  | 43  | 173 | 7  |  |  |  |  |  |  |  |
| 83.31 | 15 | 0 | 0 | 0  | 76  | 35  | 59  | 63  | 50  | 264 | 0  |  |  |  |  |  |  |  |
| 83.41 | 22 | 0 | 0 | 8  | 68  | 102 | 120 | 39  | 35  | 469 | 0  |  |  |  |  |  |  |  |
| 83.50 | 41 | 0 | 0 | 19 | 54  | 54  | 74  | 121 | 35  | 242 | 11 |  |  |  |  |  |  |  |
| 83.61 | 64 | 0 | 0 | 12 | 126 | 70  | 69  | 70  | 45  | 272 | 0  |  |  |  |  |  |  |  |
| 83.71 | 52 | 0 | 0 | 42 | 103 | 79  | 132 | 90  | 81  | 119 | 25 |  |  |  |  |  |  |  |
| 83.81 | 37 | 0 | 0 | 0  | 80  | 31  | 0   | 76  | 48  | 297 | 5  |  |  |  |  |  |  |  |
| 83.91 | 26 | 0 | 0 | 0  | 86  | 111 | 119 | 69  | 15  | 365 | 8  |  |  |  |  |  |  |  |
| 84.01 | 46 | 0 | 0 | 0  | 82  | 69  | 78  | 30  | 40  | 375 | 8  |  |  |  |  |  |  |  |
| 84.11 | 37 | 8 | 0 | 36 | 101 | 78  | 131 | 72  | 39  | 228 | 0  |  |  |  |  |  |  |  |
| 84.20 | 22 | 0 | 0 | 15 | 97  | 82  | 191 | 74  | 31  | 280 | 14 |  |  |  |  |  |  |  |
| 84.31 | 30 | 0 | 0 | 17 | 93  | 63  | 0   | 81  | 34  | 353 | 8  |  |  |  |  |  |  |  |
| 84.41 | 15 | 0 | 0 | 31 | 82  | 77  | 219 | 11  | 58  | 358 | 10 |  |  |  |  |  |  |  |
| 84.51 | 28 | 0 | 0 | 0  | 111 | 114 | 189 | 126 | 36  | 329 | 0  |  |  |  |  |  |  |  |
| 84.61 | 32 | 0 | 4 | 0  | 93  | 102 | 177 | 31  | 42  | 339 | 0  |  |  |  |  |  |  |  |
| 84.71 | 53 | 0 | 0 | 0  | 69  | 54  | 143 | 96  | 41  | 344 | 0  |  |  |  |  |  |  |  |
| 84.81 | 19 | 0 | 0 | 6  | 68  | 111 | 11  | 20  | 41  | 378 | 0  |  |  |  |  |  |  |  |
| 84.91 | 30 | 0 | 0 | 6  | 81  | 64  | 59  | 71  | 53  | 323 | 18 |  |  |  |  |  |  |  |
| 85.00 | 33 | 0 | 0 | 38 | 115 | 89  | 64  | 54  | 53  | 262 | 28 |  |  |  |  |  |  |  |
| 85.11 | 6  | 0 | 0 | 36 | 58  | 96  | 73  | 63  | 73  | 204 | 9  |  |  |  |  |  |  |  |
| 85.21 | 24 | 0 | 0 | 13 | 84  | 28  | 110 | 79  | 54  | 229 | 10 |  |  |  |  |  |  |  |
| 85.31 | 63 | 0 | 0 | 29 | 107 | 39  | 110 | 58  | 24  | 210 | 19 |  |  |  |  |  |  |  |
| 85.41 | 34 | 7 | 0 | 10 | 50  | 59  | 71  | 34  | 44  | 139 | 0  |  |  |  |  |  |  |  |
| 85.51 | 41 | 0 | 0 | 0  | 77  | 123 | 137 | 49  | 62  | 260 | 28 |  |  |  |  |  |  |  |
| 85.60 | 42 | 0 | 0 | 7  | 63  | 30  | 59  | 65  | 64  | 100 | 20 |  |  |  |  |  |  |  |
| 85.71 | 44 | 0 | 0 | 24 | 123 | 64  | 188 | 89  | 61  | 245 | 25 |  |  |  |  |  |  |  |
| 85.80 | 52 | 0 | 0 | 15 | 44  | 81  | 126 | 126 | 54  | 237 | 19 |  |  |  |  |  |  |  |
| 85.91 | 36 | 0 | 0 | 0  | 76  | 79  | 164 | 61  | 35  | 283 | 4  |  |  |  |  |  |  |  |
| 86.01 | 26 | 0 | 0 | 0  | 53  | 87  | 109 | 179 | 38  | 278 | 0  |  |  |  |  |  |  |  |
| 86.11 | 15 | 0 | 0 | 42 | 61  | 51  | 66  | 77  | 70  | 225 | 0  |  |  |  |  |  |  |  |
| 86.21 | 16 | 0 | 0 | 0  | 61  | 91  | 40  | 92  | 50  | 287 | 0  |  |  |  |  |  |  |  |
| 86.31 | 54 | 0 | 0 | 0  | 61  | 78  | 131 | 0   | 56  | 236 | 7  |  |  |  |  |  |  |  |
| 86.40 | 27 | 0 | 0 | 31 | 137 | 89  | 35  | 59  | 34  | 413 | 15 |  |  |  |  |  |  |  |
| 86.51 | 31 | 0 | 0 | 9  | 70  | 94  | 106 | 82  | 75  | 497 | 16 |  |  |  |  |  |  |  |
| 86.61 | 39 | 0 | 0 | 19 | 94  | 106 | 61  | 107 | 47  | 230 | 0  |  |  |  |  |  |  |  |
| 86.71 | 46 | 0 | 0 | 19 | 107 | 201 | 109 | 97  | 114 | 253 | 0  |  |  |  |  |  |  |  |
| 86.81 | 0  | 0 | 0 | 16 | 82  | 137 | 72  | 41  | 81  | 655 | 5  |  |  |  |  |  |  |  |
| 86.90 | 16 | 0 | 0 | 21 | 65  | 97  | 66  | 0   | 0   | 623 | 0  |  |  |  |  |  |  |  |
| 87.00 | 9  | 0 | 0 | 30 | 67  | 74  | 0   | 0   | 9   | 723 | 6  |  |  |  |  |  |  |  |
| 87.11 | 12 | 0 | 0 | 22 | 93  | 73  | 81  | 17  | 56  | 633 | 0  |  |  |  |  |  |  |  |
| 87.21 | 7  | 0 | 0 | 37 | 84  | 49  | 46  | 0   | 19  | 722 | 0  |  |  |  |  |  |  |  |
| 87.30 | 15 | 0 | 0 | 87 | 42  | 79  | 0   | 60  | 40  | 640 | 5  |  |  |  |  |  |  |  |
| 87.40 | 14 | 0 | 0 | 5  | 51  | 61  | 46  | 0   | 27  | 670 | 0  |  |  |  |  |  |  |  |
| 87.51 | 0  | 0 | 0 | 7  | 62  | 51  | 0   | 22  | 26  | 600 | 0  |  |  |  |  |  |  |  |
| 87.61 | 21 | 0 | 0 | 40 | 85  | 85  | 53  | 0   | 29  | 691 | 5  |  |  |  |  |  |  |  |
| 87.71 | 0  | 0 | 0 | 7  | 70  | 92  | 0   | 0   | 57  | 739 | 0  |  |  |  |  |  |  |  |
| 87.81 | 14 | 0 | 0 | 29 | 69  | 96  | 0   | 50  | 20  | 576 | 12 |  |  |  |  |  |  |  |
| 87.91 | 0  | 0 | 0 | 17 | 54  | 90  | 53  | 0   | 35  | 724 | 0  |  |  |  |  |  |  |  |
| 88.01 | 4  | 0 | 0 | 6  | 64  | 38  | 0   | 0   | 34  | 538 | 35 |  |  |  |  |  |  |  |
| 88.11 | 36 | 0 | 0 | 0  | 47  | 76  | 24  | 0   | 41  | 668 | 0  |  |  |  |  |  |  |  |
| 88.21 | 15 | 0 | 0 | 21 | 54  | 97  | 91  | 15  | 24  | 768 | 0  |  |  |  |  |  |  |  |
| 88.31 | 0  | 0 | 0 | 37 | 57  | 56  | 0   | 5   | 27  | 557 | 0  |  |  |  |  |  |  |  |
| 88.40 | 18 | 0 | 0 | 31 | 69  | 76  | 15  | 0   | 38  | 684 | 0  |  |  |  |  |  |  |  |
| 88.51 | 38 | 0 | 0 | 28 | 74  | 71  | 86  | 98  | 31  | 487 | 0  |  |  |  |  |  |  |  |
| 88.61 | 15 | 0 | 0 | 5  | 61  | 75  | 62  | 0   | 43  | 621 | 0  |  |  |  |  |  |  |  |
| 88.70 | 15 | 0 | 0 | 17 | 76  | 69  | 0   | 28  | 29  | 619 | 22 |  |  |  |  |  |  |  |

|       |    |   |    |    |    |     |     |     |      |     |    |  |  |  |  |  |  |  |
|-------|----|---|----|----|----|-----|-----|-----|------|-----|----|--|--|--|--|--|--|--|
| 88.81 | 36 | 0 | 0  | 26 | 44 | 33  | 0   | 0   | 50   | 567 | 36 |  |  |  |  |  |  |  |
| 88.90 | 5  | 0 | 0  | 9  | 67 | 34  | 0   | 0   | 15   | 671 | 0  |  |  |  |  |  |  |  |
| 89.01 | 21 | 0 | 0  | 0  | 62 | 72  | 0   | 29  | 11   | 661 | 0  |  |  |  |  |  |  |  |
| 89.11 | 0  | 0 | 0  | 0  | 54 | 23  | 40  | 45  | 64   | 533 | 0  |  |  |  |  |  |  |  |
| 89.20 | 13 | 0 | 0  | 51 | 68 | 75  | 41  | 43  | 45   | 717 | 0  |  |  |  |  |  |  |  |
| 89.31 | 0  | 0 | 0  | 0  | 96 | 60  | 54  | 81  | 109  | 415 | 14 |  |  |  |  |  |  |  |
| 89.40 | 37 | 0 | 0  | 36 | 54 | 74  | 71  | 0   | 948  | 525 | 0  |  |  |  |  |  |  |  |
| 89.50 | 8  | 0 | 0  | 0  | 62 | 132 | 19  | 0   | 1442 | 478 | 16 |  |  |  |  |  |  |  |
| 89.61 | 0  | 0 | 0  | 0  | 90 | 94  | 18  | 126 | 1430 | 465 | 20 |  |  |  |  |  |  |  |
| 89.71 | 15 | 0 | 0  | 0  | 51 | 121 | 46  | 79  | 1158 | 453 | 33 |  |  |  |  |  |  |  |
| 89.81 | 34 | 0 | 0  | 22 | 89 | 99  | 28  | 61  | 697  | 358 | 6  |  |  |  |  |  |  |  |
| 89.91 | 35 | 0 | 0  | 0  | 78 | 117 | 171 | 0   | 556  | 316 | 0  |  |  |  |  |  |  |  |
| 90.00 | 25 | 0 | 0  | 13 | 86 | 89  | 10  | 5   | 318  | 354 | 14 |  |  |  |  |  |  |  |
| 90.11 | 27 | 0 | 0  | 49 | 84 | 64  | 84  | 126 | 180  | 489 | 13 |  |  |  |  |  |  |  |
| 90.20 | 15 | 0 | 0  | 17 | 60 | 89  | 0   | 135 | 175  | 239 | 14 |  |  |  |  |  |  |  |
| 90.31 | 42 | 0 | 0  | 13 | 62 | 243 | 0   | 82  | 352  | 288 | 12 |  |  |  |  |  |  |  |
| 90.41 | 36 | 0 | 0  | 17 | 60 | 191 | 49  | 53  | 480  | 373 | 11 |  |  |  |  |  |  |  |
| 90.50 | 44 | 0 | 0  | 5  | 68 | 91  | 0   | 21  | 519  | 257 | 0  |  |  |  |  |  |  |  |
| 90.61 | 18 | 0 | 0  | 0  | 52 | 65  | 90  | 156 | 478  | 162 | 19 |  |  |  |  |  |  |  |
| 90.71 | 24 | 0 | 0  | 0  | 85 | 116 | 132 | 57  | 396  | 245 | 0  |  |  |  |  |  |  |  |
| 90.80 | 42 | 0 | 0  | 0  | 64 | 84  | 157 | 103 | 316  | 439 | 28 |  |  |  |  |  |  |  |
| 90.91 | 15 | 0 | 0  | 22 | 67 | 90  | 38  | 81  | 257  | 315 | 26 |  |  |  |  |  |  |  |
| 91.00 | 55 | 0 | 0  | 18 | 73 | 86  | 16  | 32  | 312  | 389 | 0  |  |  |  |  |  |  |  |
| 91.10 | 42 | 0 | 0  | 33 | 83 | 97  | 47  | 83  | 388  | 315 | 12 |  |  |  |  |  |  |  |
| 91.21 | 55 | 0 | 0  | 16 | 59 | 154 | 54  | 88  | 498  | 204 | 5  |  |  |  |  |  |  |  |
| 91.30 | 31 | 0 | 9  | 28 | 78 | 90  | 72  | 180 | 467  | 208 | 21 |  |  |  |  |  |  |  |
| 91.41 | 51 | 0 | 5  | 11 | 24 | 46  | 147 | 167 | 400  | 130 | 11 |  |  |  |  |  |  |  |
| 91.51 | 43 | 7 | 0  | 39 | 50 | 98  | 104 | 142 | 381  | 115 | 7  |  |  |  |  |  |  |  |
| 91.60 | 32 | 0 | 11 | 0  | 47 | 108 | 111 | 167 | 352  | 50  | 0  |  |  |  |  |  |  |  |
| 91.71 | 49 | 0 | 0  | 16 | 63 | 86  | 154 | 146 | 185  | 29  | 0  |  |  |  |  |  |  |  |
| 91.81 | 26 | 9 | 0  | 30 | 4  | 84  | 93  | 132 | 82   | 7   | 13 |  |  |  |  |  |  |  |
